# Supplementary material for: Does size matter? A proteomics-informed comparison of the effects of polystyrene beads of different sizes on macrophages
Source: Royal Society of Chemistry journal article supplement (doi:10.1039/d2en00214k), 2022-01-01
Supplement: d2en00214k1.pdf [file d2en00214k1.pdf]

Fig. S1: size determination of the beads

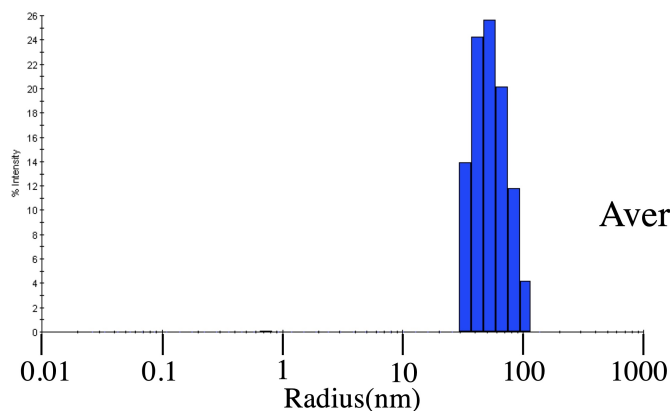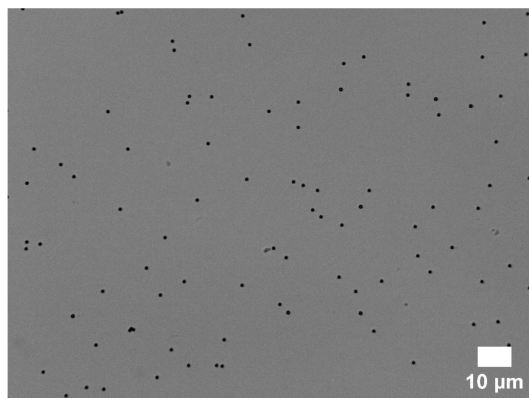

Optical microscopy  
(1 and 10  $\mu\text{m}$  beads)

Average diameter :  $1.09 \pm 0.16$   $\mu\text{m}$   
Number of measurements = 144

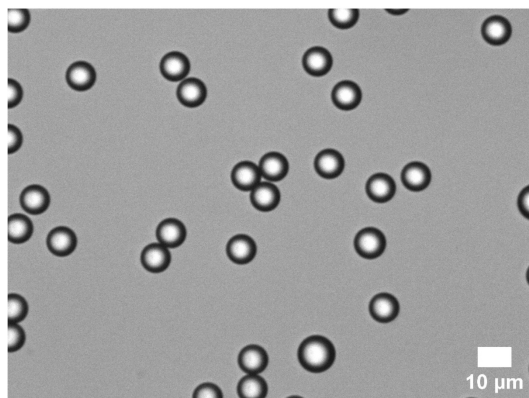

Average diameter:  $9.61 \pm 1.21$   $\mu\text{m}$   
Number of measurements = 144
