# Supplementary material for: Does size matter? A proteomics-informed comparison of the effects of polystyrene beads of different sizes on macrophages
Source: Royal Society of Chemistry journal article supplement (doi:10.1039/d2en00214k), 2022-01-01
Supplement: d2en00214k3.pdf [file d2en00214k3.pdf]

Supplementary Table 1. List of proteins detected and quantified by the proteomic screen

| acc name | gene name | UniProt description                                                 | protein_set_score | coverage | MW (Da) | #peptides | ab PS10 a  | ab PS10 b  | ab PS10 d  | ab PS10 e  | ab PS1 a   | ab PS1 b   | ab PS1 c   | ab PS1 d   | ab PS1 e    | ab PS1 a.b | ab PS1 a.c | ab PS1 a.d | ab PS1 a.e |            |            |             |            |            |            |
|----------|-----------|---------------------------------------------------------------------|-------------------|----------|---------|-----------|------------|------------|------------|------------|------------|------------|------------|------------|-------------|------------|------------|------------|------------|------------|------------|-------------|------------|------------|------------|
| P58742   | Aaas      | Aladin                                                              | 195.6             | 8.24     | 59431   | 4         | 18564.5452 | 14188.3231 | 16001.3734 | 42442.7092 | 42347.4131 | 5421.66248 | 28524.1431 | 33127.1072 | 34083.0709  | 20876.2188 | 28762.2307 | 16494.913  | 29977.192  | 41759.0925 | 31515.7146 | 21625.1329  | 14095.9808 | 11794.8825 | 31992.5581 |
| Q9D280   | Aaacs     | Acetylacetyl-CoA synthetase                                         | 118.49            | 4.17     | 75200   | 3         | 10735.4207 | 47456.7698 | 4137.0687  | 11599.6369 | 28765.9182 | 71955.812  | 69030.3845 | 59098.0748 | 63565.0013  | 47968.9943 | 51568.5075 | 53677.6182 | 53147.6846 | 45304.4125 | 55626.9791 | 44468.1738  | 55646.3328 | 56315.4448 | 49031.8081 |
| Q8BQ27   | Aar       | Adenylyl-RNA ligase, cytoplasmic                                    | 1526.94           | 40.19    | 106069  | 26        | 24075.327  | 25394.128  | 28734.838  | 16411.61   | 13830.901  | 42274.009  | 44151.022  | 4276.912   | 42344.62    | 42338.48   | 48537.349  | 38185.451  | 43909.319  | 26250.432  | 48348.81   | 41308.397   | 38214.536  | 32151.31   | 33004.64   |
| Q3HT09   | Aarsd1    | Alanyl-tRNA editing protein Aarsd1                                  | 286.5             | 16.26    | 44971   | 5         | 95285.7661 | 25988.5102 | 26079.7747 | 10990.5737 | 14391.7872 | 36916.6102 | 60060.5465 | 60277.6617 | 62292.6717  | 11737.1061 | 31343.9388 | 40859.790  | 79292.3418 | 43016.1874 | 61344.1001 | 42401.0213  | 35396.2566 | 42495.1917 | 40895.1748 |
| Q61102   | Abec7     | ATP-binding cassette sub-family B member 7, mitochondrial           | 168.81            | 5.32     | 82581   | 3         | 0.04731231 | 27342.1951 | 27968.5511 | 47116.497  | 16755.8092 | 40508.9701 | 29720.0687 | 23299.7227 | 28412.9185  | 18198.8363 | 26822.3086 | 18354.0655 | 10027.1928 | 22339.7724 | 38167.2268 | 23356.6225  | 22021.1626 | 20769.4665 | 26952.699  |
| B2R2X1   | Abec3     | Canicular-specific organic anion transporter 2                      | 198.57            | 3.81     | 169124  | 1         | 0.04731231 | 19077.2427 | 23498.2522 | 55966.8766 | 45317.4169 | 13577.9138 | 10409.4344 | 11157.3798 | 11893.0967  | 14048.2327 | 18314.6201 | 21463.6947 | 14086.7722 | 24097.5845 | 31912.447  | 12699.8255  | 21550.3855 | 8160.58356 | 20315.077  |
| P55096   | Abcd3     | ATP-binding cassette sub-family D member 3                          | 62.71             | 2.58     | 75475   | 1         | 0.04731231 | 9074.37903 | 1140.68387 | 4826.32639 | 2153.72197 | 549.82757  | 622.822868 | 732.978308 | 557.45403   | 746.11786  | 1724.88533 | 2031.07999 | 3499.65622 | 1425.61211 | 13978.0020 | 11029.82595 | 1484.3102  | 1640.79    | 6731.4     |
| Q8BQ27   | Abcd1     | ATP-binding cassette sub-family E member 1                          | 1526.94           | 40.19    | 106069  | 26        | 24075.327  | 25394.128  | 28734.838  | 16411.61   | 13830.901  | 42274.009  | 44151.022  | 4276.912   | 42344.62    | 42338.48   | 48537.349  | 38185.451  | 43909.319  | 26250.432  | 48348.81   | 41308.397   | 38214.536  | 32151.31   | 33004.64   |
| Q6P546   | Abcf1     | ATP-binding cassette sub-family F member 1                          | 414.04            | 13.62    | 94945   | 8         | 86690.934  | 115927.041 | 85438.4239 | 79068.2004 | 69949.8473 | 142231.738 | 160778.734 | 146047.493 | 133395.997  | 160874.529 | 14736.2366 | 149496.948 | 163927.529 | 134055.148 | 150625.946 | 161257.261  | 131365.863 | 150598.21  | 132479.056 |
| Q9JLE6   | Abcf2     | ATP-binding cassette sub-family F member 2                          | 124.97            | 5.57     | 71782   | 3         | 0.04731231 | 16258.005  | 18013.2759 | 5113.6297  | 9899.5344  | 28257.1855 | 26173.8343 | 40210.6143 | 28065.1294  | 27299.4647 | 26250.7612 | 24674.8292 | 28531.265  | 25824.407  | 25045.4593 | 30118.0647  | 22512.2845 | 26581.7907 | 26710.74   |
| Q6AVY7   | Abhd12    | Monooxygenylipase ABHD12                                            | 475.06            | 31.41    | 42560   | 10        | 200610.105 | 175839.2   | 155691.590 | 292007.412 | 267553.776 | 273565.61  | 230157.106 | 263337.089 | 298339.926  | 108139.106 | 156667.823 | 139416.458 | 120230.707 | 169376.605 | 163975.921 | 167976.659  | 136371.249 | 140566.222 | 183397.761 |
| Q6QD61   | Abhd14b   | Protein ABHD14b                                                     | 72.93             | 10       | 22618   | 2         | 0.04731231 | 3498.9702  | 25966.9200 | 10.0251027 | 4076.58324 | 4729.31411 | 3501.34041 | 3113.04566 | 4664.57913  | 3949.01841 | 4055.07858 | 3605.91583 | 6072.91497 | 3591.6628  | 4315.86973 | 3792.78149  | 3706.87791 | 3173.16702 |            |
| Q8CB39   | Abi1      | Abi1 interactor 1                                                   | 99.73             | 6.44     | 52288   | 2         | 2089.15924 | 27262.9013 | 27888.6165 | 14342.3101 | 20524.1777 | 39911.3834 | 34437.462  | 42899.1297 | 36484.3596  | 42330.3299 | 35349.1561 | 35290.7962 | 33810.4241 | 31102.1753 | 33967.2573 | 29453.314   | 31081.8496 | 31637.761  | 29882.8541 |
| Q4MKM4   | Abracl    | Costs family protein ABRACL                                         | 312.09            | 51.85    | 9030    | 6         | 27951.7549 | 65577.9422 | 71265.9113 | 17616.3736 | 38455.8877 | 57571.7005 | 61357.4240 | 94682.0544 | 70060.8713  | 17149.4618 | 87511.6077 | 82035.9374 | 80208.2388 | 88239.0221 | 66426.4924 | 65137.3971  | 82734.5683 |            |            |
| Q3TC21   | Abra2a2   | BRIC complex subunit Abra2a2                                        | 218.47            | 14.7     | 46943   | 4         | 18777.0203 | 14186.0304 | 17786.4109 | 0.02587718 | 11240.723  | 11599.5593 | 25957.9625 | 20929.1136 | 21671.932   | 14616.4752 | 25663.8908 | 31406.1087 | 21385.9759 | 28588.4626 | 16668.1495 | 31619.205   | 18188.3949 | 24884.0776 | 17230.0589 |
| Q921H8   | Acala1    | 3-ketocetyl-CoA thiolase A, peroxisomal                             | 994.73            | 60.14    | 43933   | 15        | 318066.844 | 324803.614 | 335800.938 | 134949.012 | 140218.645 | 233690.592 | 247636.153 | 204080.015 | 263555.348  | 259031.424 | 328313.374 | 289095.919 | 227933.506 | 22507.262  | 33045.376  | 297674.833  | 264684.619 | 236693.138 | 332656.314 |
| Q8WB71   | Aca2      | 3-ketocetyl-CoA thiolase, mitochondrial                             | 76.16             | 6.05     | 41950   | 1         | 0.04731231 | 8229.259   | 10145.1519 | 12326.6097 | 3755.23868 | 5687.2913  | 4925.32669 | 6034.59392 | 6010.414829 | 28533.0633 | 11195.1392 | 6271.74508 | 7399.79028 | 6879.8647  | 8798.2939  | 5926.12585  | 6037.5899  | 6070.78217 |            |
| P11497   | Aca3      | Acetyl-CoA carboxylase 1                                            | 179.64            | 2.6      | 265194  | 4         | 0.04731231 | 2979.5179  | 8479.7565  | 8182.4968  | 11148.5808 | 21692.0012 | 14910.8711 | 16341.3209 | 12152.116   | 22344.1147 | 24547.977  | 15113.1926 | 5101.7836  | 13243.9596 | 19400.7666 | 19256.63075 | 10907.0086 | 14377.2819 | 16093.5752 |
| E9Q42Z   | Aca4      | Acetyl-CoA carboxylase 2                                            | 63.4              | 1.35     | 275750  | 1         | 0.04731231 | 5898.3305  | 0.03207024 | 0.02587718 | 5097.73914 | 7457.33865 | 6154.2345  | 4864.1348  | 2029.8782   | 6253.21009 | 6388.47734 | 5793.0212  | 6294.06481 | 6453.56994 | 8198.52409 | 5202.25262  | 0.03396139 | 5376.54373 | 6097.09876 |
| Q9D7B6   | Aca8      | Isobutyryl-CoA dehydrogenase, mitochondrial                         | 94.39             | 6.54     | 45020   | 2         | 0.04731231 | 7232.17439 | 8876.45935 | 7328.13822 | 0.0251027  | 7976.38443 | 9257.40033 | 11177.4278 | 12659.8006  | 8482.40451 | 6573.1247  | 8494.08181 | 4836.35003 | 3589.46215 | 5231.7695  | 6755.31     | 6310.09704 | 6875.53608 | 6511.93864 |
| Q8JZNS   | Aca9      | Acyl-CoA dehydrogenase family member 9, mitochondrial               | 411.4             | 13.6     | 68722   | 8         | 28245.372  | 73349.412  | 54811.0822 | 7850.2439  | 32681.0816 | 68711.4002 | 69429.6698 | 80823.7622 | 77306.3977  | 56800.9891 | 71481.7136 | 62052.2469 | 64007.971  | 5905.2224  | 68831.1872 | 81423.1854  | 57784.8432 | 61155.4784 | 68804.0028 |
| PS1174   | Acad1     | Long-chain specific acyl-CoA dehydrogenase, mitochondrial           | 1052.21           | 40.47    | 47908   | 18        | 381749.419 | 514596.902 | 520996.879 | 289203.335 | 237433.11  | 635647.074 | 636908.361 | 660418.197 | 681624.588  | 368842.2   | 399162.088 | 360882.998 | 374874.648 | 331621.287 | 429130.189 | 433379.339  | 433541.536 | 365514.532 | 382395.575 |
| P45952   | Acadm     | Medium-chain specific acyl-CoA dehydrogenase, mitochondrial         | 522.56            | 31.12    | 46481   | 11        | 188548.351 | 265181.376 | 233655.511 | 193179.604 | 110211.462 | 272729.196 | 286435.095 | 277085.028 | 305342.802  | 209514.32  | 195412.389 | 209331.305 | 199150.891 | 179572.689 | 230031.767 | 219730.238  | 197228.995 | 203317.227 | 198957.771 |
| Q07417   | Acads     | Short-chain specific acyl-CoA dehydrogenase, mitochondrial          | 395               | 21.84    | 44890   | 7         | 30035.957  | 98336.1056 | 99463.3212 | 69629.1033 | 65709.315  | 94201.8457 | 88386.9405 | 82645.4462 | 88703.2304  | 63853.2483 | 65236.5511 | 58007.3111 | 58995.5957 | 45574.0705 | 52035.2225 | 79732.3428  | 76897.4039 | 78377.2597 | 73509.9183 |
| P70584   | Acadb5    | Short branched chain specific acyl-CoA dehydrogenase, mitochondrial | 217.51            | 10.19    | 47824   | 4         | 69970.8106 | 61940.9624 | 66004.6487 | 54920.9872 | 36596.2983 | 51333.2039 | 59354.9538 | 86081.2156 | 40471.2879  | 53329.6699 | 51883.3751 | 42312.3777 | 43788.2321 | 39091.9497 | 54993.2276 | 47186.7604  | 55087.1416 | 48888.6623 | 57509.4143 |
| P50544   | Acadv1    | Very long-chain specific acyl-CoA dehydrogenase, mitochondrial      | 330.04            | 12.65    | 70875   | 5         | 49789.3104 | 61940.9624 | 66004.6487 | 54920.9872 | 36596.2983 | 51333.2039 | 59354.9538 | 86081.2156 | 40471.2879  | 53329.6699 | 51883.3751 | 42312.3777 | 43788.2321 | 39091.9497 | 54993.2276 | 47186.7604  | 55087.1416 | 48888.6623 | 57509.4143 |
| Q8QZT1   | Acad1     | Acetyl-CoA acetyltransferase, mitochondrial                         | 761.55            | 38.44    | 44816   | 11        | 717283.077 | 528427.184 | 444019.813 | 269002.157 | 214628.4   | 375058.033 | 411104.387 | 403181.183 | 407252.916  | 462380.093 | 536358.002 | 492759.818 | 469231.367 | 335690.953 | 497378.718 | 525763.645  | 374314.709 | 449873.75  | 530733.594 |
| Q8QAY6   | Acad2     | Acetyl-CoA acetyltransferase, cytosolic                             | 1029.67           | 27.46    | 41298   | 6         | 62736.6636 | 96616.2193 | 84855.1313 | 37601.1693 | 43216.4635 | 86587.7774 | 104302.071 | 96214.1202 | 92366.054   | 152860.865 | 127342.862 | 102873.788 | 119589.826 | 102883.017 | 126178.286 | 136065.336  | 101858.268 | 110797.487 | 84399.4296 |
| Q8BMP6   | Achd3     | Golgi resident protein GCP60                                        | 395.69            | 20.76    | 60181   | 7         | 1060.16915 | 1609.5929  | 54021.3798 | 13266.7654 | 12151.1484 | 73322.0686 | 66714.4748 | 73017.7374 | 68037.1162  | 50019.0131 | 60173.5708 | 55510.0027 | 5102.1188  | 52228.9599 | 39693.2987 | 64742.6879  | 58754.6022 | 47697.0017 | 53971.197  |
| Q9JIX8   | Acin1     | Acidic chromatin condensation inducer in the nucleus                | 615.89            | 9.64     | 150719  | 11        | 68789.7698 | 75280.0719 | 56890.6454 | 100998.898 | 97350.1867 | 52613.1662 | 60801.3223 | 75023.7613 | 71404.877   | 59761.7102 | 57027.7934 | 65851.0902 | 61562.8198 | 72622.7823 | 61223.8974 | 83175.3783  | 52758.6342 | 70272.0591 | 65811.6875 |
| Q9V192   | Acy       | ATP citrate lyase                                                   | 1852.34           | 31.35    | 119728  | 28        | 318984.97  | 486199.786 | 397203.476 | 25455.933  | 226859.607 | 611296.144 | 727472.676 | 672071.02  | 599952.103  | 693116.128 | 568550.15  | 561898.461 | 618771.879 | 459034.554 | 519573.146 | 660608.914  | 528009.083 | 557756.182 | 522045.423 |
| Q9V190   | Acyl1     | Cytoplasmic acylase                                                 | 242.46            | 7.76     | 98126   | 5         | 7935.63827 | 76861.8857 | 46285.1728 | 50493.2179 | 47907.3184 | 65958.7865 | 91869.052  |            |             |            |            |            |            |            |            |             |            |            |            |



|        |        |                                                                         |        |       |        |    |            |            |             |            |            |            |            |            |             |             |            |            |             |            |             |            |            |            |            |            |  |  |  |
|--------|--------|-------------------------------------------------------------------------|--------|-------|--------|----|------------|------------|-------------|------------|------------|------------|------------|------------|-------------|-------------|------------|------------|-------------|------------|-------------|------------|------------|------------|------------|------------|--|--|--|
| QBWV1  | Arhg20 | Rho GTPase-activating protein 25                                        | 332.92 | 13.12 | 73383  | 6  | 24642.370  | 46590.7204 | 35181.1406  | 9435.56884 | 16138.2572 | 82320.0223 | 92194.4260 | 97658.0095 | 83848.0105  | 71011.0706  | 50487.5313 | 59201.3486 | 70384.2877  | 64687.2379 | 58406.9177  | 74065.9367 | 47783.1635 | 58006.1404 | 55888.0575 | 18298.0343 |  |  |  |
| G6V0N3 | Arhg30 | Rho GTPase-activating protein 30                                        | 118.31 | 2.54  | 120114 | 3  | 40731.231  | 41139.9453 | 119224.4142 | 56688.2434 | 14808.4833 | 17890.4383 | 14770.5787 | 13789.8615 | 16564.5244  | 13877.4146  | 13978.0616 | 17358.1999 | 17032.0099  | 17839.7407 | 14427.1305  | 17363.9327 | 12644.8032 | 13839.7482 | 12588.0543 |            |  |  |  |
| Q3TBTD | Arhg45 | Rho GTPase-activating protein 45                                        | 175.73 | 3.94  | 122902 | 3  | 52620.730  | 4863.8171  | 2846.4759   | 10599.951  | 4171.99754 | 4569.03835 | 3680.10265 | 12623.3101 | 7012.8193   | 16079.2201  | 13241.6085 | 7007.98782 | 13808.9321  | 8324.43132 | 6791.13007  | 18213.1927 | 4487.7243  | 13033.422  | 7926.3801  |            |  |  |  |
| Q5X173 | Arhg4  | Rho GDP-dissociation inhibitor 1                                        | 873.93 | 71.08 | 123407 | 13 | 21520.6328 | 1375.6557  | 671129.479  | 538665.709 | 640905.261 | 171955.627 | 163366.914 | 1068189.15 | 162594.9415 | 711029.25   | 1749865.61 | 1743099.91 | 1611637.18  | 1584516.41 | 166392.967  | 149555.75  | 1459888.01 | 1510248.95 |            |            |  |  |  |
| Q61599 | Arhgdb | Rho GDP-dissociation inhibitor 2                                        | 747.94 | 73    | 122851 | 13 | 1139847.77 | 1051223.03 | 949977.734  | 400744.107 | 549015.791 | 1139984.67 | 1783791.74 | 97361.984  | 1053661.21  | 1315665.60  | 1136999.18 | 1117225.8  | 1128034.25  | 958939.915 | 737974.237  | 1210744.88 | 1086229.97 | 1141580.97 | 1189845.87 |            |  |  |  |
| Q61210 | Arhgf1 | Rho guanine nucleotide exchange factor 1                                | 525.33 | 12.83 | 120805 | 9  | 92539.4178 | 58703.243  | 59897.436   | 63072.706  | 57888.3983 | 21326.2223 | 83771.8411 | 7877.7339  | 86396.4752  | 69385.0405  | 88221.1335 | 92447.2508 | 85451.4755  | 9238.1567  | 97761.5872  | 93007.7691 | 68436.5099 | 8446.7886  | 89245.3066 |            |  |  |  |
| Q5FV42 | Arhgf2 | Rho guanine nucleotide exchange factor 2                                | 452.36 | 11.37 | 118140 | 8  | 52964.3469 | 61537.5617 | 65110.8669  | 52981.7835 | 60658.0971 | 7007.4478  | 78140.678  | 85736.5982 | 72348.1662  | 94153.719   | 90207.0716 | 82136.1213 | 87791.1203  | 80277.1469 | 6734.1291   | 87975.3766 | 72919.904  | 83793.57   | 76230.7337 |            |  |  |  |
| Q5O543 | Arhgf7 | Rho guanine nucleotide exchange factor 7                                | 46.31  | 3.1   | 73140  | 1  | 40731.231  | 2552.8551  | 64107.9759  | 5879.3671  | 56573.6134 | 3085.00214 | 9737.12012 | 5180.4879  | 8341.558    | 138.77759   | 9503500.71 | 7475.39072 | 5156.31773  | 5277.57939 | 4034888.12  | 5936.45454 | 5630.77113 | 5801.89764 | 7237.36987 |            |  |  |  |
| AZBH40 | Arid1a | AT-rich interactive domain-containing protein 1A                        | 249.23 | 1.01  | 242902 | 2  | 21354.390  | 19584.8798 | 94620.7230  | 23834.971  | 32086.0793 | 6235.0954  | 9732.8809  | 427.8146   | 21862.4395  | 202594.7767 | 754.454433 | 27627.7093 | 6524.78836  | 29507.1406 | 621257.5512 | 27594.6723 | 24976.1175 | 24895.4467 | 768.623924 |            |  |  |  |
| EQ7E2E | Arid2  | AT-rich interactive domain-containing protein 2                         | 49.8   | 4.09  | 195988 | 1  | 40731.231  | 9659.1047  | 7420.83315  | 0.02587718 | 11475.6196 | 9838.67236 | 7820.45053 | 6175.43944 | 6685.3493   | 9665.16642  | 6608.65676 | 11070.862  | 11701.2945  | 6465.59494 | 6817.33315  | 8391.16603 | 9503.55105 | 7664.89923 | 9810.48907 |            |  |  |  |
| P61211 | Arl1   | ADP-ribosylation factor-like protein 1                                  | 127.04 | 18.78 | 20412  | 2  | 40731.231  | 5715.6012  | 4240.0053   | 2682.558   | 21307.3497 | 78717.3497 | 48284.2180 | 52403.9042 | 38609.1898  | 42224.8194  | 57785.6183 | 28105.3796 | 46873.6478  | 60665.6351 | 57726.6652  | 45574.6035 | 41427.0285 | 48493.632  |            |            |  |  |  |
| O08697 | Arl2   | ADP-ribosylation factor-like protein 2                                  | 120.24 | 15.22 | 20836  | 3  | 58116.975  | 18271.1717 | 14399.5984  | 0.02587718 | 6534.89660 | 27640.1902 | 18925.6556 | 24276.6598 | 21960.8847  | 23083.2325  | 22507.8648 | 25367.6446 | 21187.9235  | 16508.0715 | 21151.5393  | 21291.9505 | 14091.2039 | 21864.3227 | 17736.6586 |            |  |  |  |
| P79796 | Arl3   | ADP-ribosylation factor-like protein 3                                  | 191.8  | 25.82 | 20457  | 4  | 5905.5818  | 12783.2021 | 24573.6212  | 2141.30007 | 12229.768  | 28757.5426 | 31856.6624 | 2272.94426 | 2772.94407  | 32271.3734  | 39490.0216 | 34952.5548 | 81910.3718  | 22308.6553 | 25503.7977  | 37106.883  | 22274.7076 | 30645.9199 | 11733.6871 |            |  |  |  |
| Q8RS59 | Arlp5  | PEA1 family protein 3                                                   | 78.42  | 19.68 | 21558  | 2  | 40731.231  | 7278.25267 | 3708.1394   | 8647.8987  | 4176.467   | 7341.41285 | 13315.7655 | 9489.59492 | 9617.48222  | 8592.01577  | 7327.62968 | 5300.12075 | 6572.3153   | 6451.17163 | 7376.40397  | 10702.9978 | 4752.08271 | 7043.04577 | 7543.09467 |            |  |  |  |
| Q8VEH3 | Arl8a  | ADP-ribosylation factor-like protein 8A                                 | 300.78 | 44.09 | 21390  | 7  | 198240.657 | 11153.2416 | 40241.2323  | 72803.871  | 55553.955  | 134020.577 | 14589.454  | 16984.91   | 155612.997  | 76938.8152  | 84877.3734 | 82671.2103 | 82208.4093  | 74502.0524 | 89301.0779  | 115508.009 | 96364.8611 | 70895.6438 | 98507.8638 |            |  |  |  |
| Q66HA6 | Arl8b  | ADP-ribosylation factor-like protein 8B                                 | 614.67 | 62.2  | 21539  | 12 | 28082.832  | 11230.3308 | 131822.922  | 142398.613 | 136423.269 | 28198.915  | 214594.958 | 217881.419 | 265687.983  | 139091.308  | 168272.43  | 163835.275 | 1484828.016 | 148428.81  | 158651.951  | 129919.05  | 129919.05  | 185668.287 |            |            |  |  |  |
| Q8BNU0 | Arlm6  | Armadillo repeat-containing protein 6                                   | 90.76  | 4.49  | 50683  | 1  | 40731.231  | 2886.17245 | 5353.65079  | 0.02587718 | 4592.8603  | 4780.57545 | 5266.47808 | 6145.68279 | 6698.05668  | 7322.74979  | 4566.35227 | 9420.81699 | 5213.29632  | 7297.71352 | 7111.74808  | 6974.22161 | 5620.52906 | 5874.87173 | 6014.75015 |            |  |  |  |
| Q9P9D4 | Arlpca | Actin-related protein 2/3 complex subunit A                             | 167.98 | 9.46  | 41999  | 3  | 13725.355  | 86584.9971 | 103335.338  | 72801.2854 | 70602.8131 | 92878.7446 | 90396.5225 | 72451.0326 | 89954.4028  | 98808.8817  | 104053.167 | 106270.358 | 94834.8656  | 136548.078 | 109088.583  | 103074.173 | 96444.7468 | 91528.1198 | 87313.2124 |            |  |  |  |
| Q9W372 | Arlpb  | Actin-related protein 2/3 complex subunit 1B                            | 943.68 | 56.18 | 41064  | 16 | 986173.68  | 851056.548 | 863359.273  | 601961.659 | 637679.619 | 1136623.67 | 1329979.49 | 1017858.4  | 1001461.35  | 964438.771  | 913894.57  | 947225.529 | 99127.426   | 112174.79  | 990697.052  | 918417.151 | 811873.64  | 986946.469 | 747981.668 |            |  |  |  |
| Q9CVB6 | Arlpc  | Actin-related protein 2/3 complex subunit 2                             | 913.72 | 46.33 | 41064  | 15 | 253902.042 | 408777.093 | 346917.7    | 233574.452 | 216464.082 | 500041.566 | 723991.672 | 589926.604 | 649920.404  | 439773.433  | 433433.311 | 396928.569 | 508423.316  | 460818.896 | 58774.917   | 418301.227 | 432443.559 | 411766.275 |            |            |  |  |  |
| Q9JW76 | Arlpd  | Actin-related protein 2/3 complex subunit 3                             | 372.7  | 44.38 | 20525  | 7  | 290887.987 | 387307.034 | 336888.667  | 253077.236 | 275752.554 | 412720.033 | 409381.723 | 443357.283 | 36715.576   | 583068.032  | 525755.182 | 508411.581 | 538476.509  | 373233.967 | 492574.065  | 486824.979 | 381132.526 | 47802.713  | 366864.851 |            |  |  |  |
| P59999 | Arlpe  | Actin-related protein 2/3 complex subunit 4                             | 556.58 | 51.79 | 19667  | 4  | 1838321.93 | 1889575.75 | 153132.172  | 1015966.97 | 1023576.72 | 2244637.3  | 2012650.84 | 1958177.07 | 189252.51   | 1944838.76  | 1807507.78 | 1950254.35 | 1853969.83  | 177149.01  | 1946259.78  | 1821546.79 | 1585118.07 | 916482.84  | 1561043.14 |            |  |  |  |
| Q4KL78 | Arlpf  | Actin-related protein 2/3 complex subunit 5                             | 202.59 | 16.56 | 19626  | 3  | 28730.765  | 341857.062 | 303205.2609 | 215699.931 | 382419.932 | 392114.537 | 420620.236 | 377345.494 | 307925.62   | 187620.466  | 180476.918 | 405699.172 | 1689325.21  | 457845.953 | 330308.395  | 354565.918 | 366302.70  | 407455.327 | 350997.603 |            |  |  |  |
| P29066 | Arlb   | Beta-actinin-1                                                          | 217.49 | 11.96 | 46720  | 10 | 87330.596  | 97273.0531 | 79509.761   | 34787.9088 | 58436.5284 | 95919.459  | 103489.788 | 96109.3231 | 86074.574   | 137449.57   | 115224.748 | 113459.717 | 124417.15   | 119634.726 | 108539.906  | 109716.49  | 103028.179 | 115861.557 | 101576.575 |            |  |  |  |
| P29067 | Arlb   | Beta-actinin-2                                                          | 50.74  | 23.17 | 46720  | 10 | 254131.452 | 27621.988  | 228387.198  | 131753.672 | 158529.948 | 281062.141 | 281015.285 | 1074075.76 | 225395.501  | 371627.429  | 317856.469 | 313989.805 | 381435.006  | 320484.22  | 305314.928  | 341080.045 | 282098.3   | 326097.323 | 294526.764 |            |  |  |  |
| P50429 | Arsb   | Arylsulfatase B                                                         | 51.87  | 15.54 | 59647  | 8  | 215479.207 | 43465.501  | 309574.965  | 230201.108 | 256917.442 | 335431.022 | 356161.762 | 289798.143 | 312556.294  | 309422.56   | 235553.927 | 248806.412 | 308991.767  | 264783.721 | 316490.343  | 363499.012 | 293270.645 | 323590.019 | 322991.203 |            |  |  |  |
| Q91WU5 | As3mt  | Arsenite methyltransferase                                              | 146.66 | 13.3  | 41794  | 3  | 40731.231  | 20565.0059 | 12403.5753  | 5177.50665 | 3996.03464 | 9159.4678  | 19086.6043 | 16249.4184 | 19156.2949  | 12654.4909  | 19350.4336 | 16666.498  | 17473.1997  | 20094.6659 | 16509.7877  | 9986.66259 | 11132.526  | 10520.532  | 14940.1944 |            |  |  |  |
| Q9W454 | Asa1l  | Arif-GAP with SH3 domain, ANK repeat and PH domain-containing protein 1 | 788.35 | 36.29 | 44670  | 13 | 207130.012 | 123531.377 | 118333.377  | 101221.334 | 80118.9468 | 152011.993 | 187516.055 | 156093.292 | 197976.402  | 125863.217  | 135272.971 | 35559.297  | 127903.689  | 128519.502 | 130073.737  | 133317.081 | 123401.021 | 110429.592 | 146459.838 |            |  |  |  |
| Q1AA06 | Asp1   | Arg-GAP with SH3 domain, ANK repeat and PH domain-containing protein 1  | 158.6  | 5.42  | 127088 | 3  | 11780.2132 | 6796.6596  | 9582.86146  | 18096.6878 | 15787.407  | 21925.3    | 29330.0371 | 28487.956  | 34570.0815  | 27127.9387  | 22528.8882 | 27336.0245 | 26756.3732  | 34882.535  | 22359.481   | 21064.3411 | 19169.2295 | 24196.954  | 31942.0313 |            |  |  |  |
| Q91Y10 | Asl    | Argininosuccinate lyase                                                 | 446.52 | 23.28 | 51739  | 9  | 76320.837  | 34501.8877 | 30573.1316  | 15470.1348 | 12943.1408 | 70859.608  | 134558.409 | 78304.2312 | 107859.564  | 11696.1874  | 49149.2237 | 54219.2271 | 70147.441   | 54112.0399 | 31739.3039  | 59305.5956 | 85174.0574 | 50790.807  | 48392.4407 |            |  |  |  |
| OS4984 | Asna1  | ATPase Aa1                                                              | 230.76 | 14.08 | 38823  | 5  | 103070.841 | 85708.5255 | 72289.2332  | 28112.1522 | 44328.0831 | 123626.396 | 13347.615  | 122135.455 | 108136.96   | 61799.1319  | 114908.673 | 108825.132 | 110029.617  | 113133.098 | 117302.948  | 124783.987 | 91161.0256 | 91079.608  | 1302       |            |  |  |  |

|        |         |                                                                            |        |       |        |    |             |            |             |             |             |             |             |             |            |             |             |            |            |            |            |            |            |            |            |            |
|--------|---------|----------------------------------------------------------------------------|--------|-------|--------|----|-------------|------------|-------------|-------------|-------------|-------------|-------------|-------------|------------|-------------|-------------|------------|------------|------------|------------|------------|------------|------------|------------|------------|
| Q6PTQ1 | Baham2  | BRISC and BRCA1-A complex member 2                                         | 156.94 | 10.18 | 43559  | 3  | 30569.149   | 13554.858  | 10820.8174  | 6019.24447  | 6617.29577  | 30258.5679  | 20316.122   | 28940.8959  | 29164.0548 | 14475.7349  | 21509.7595  | 23005.1437 | 13603.569  | 15437.9839 | 10393.3483 | 21631.6388 | 19281.2299 | 17479.5426 | 14305.2592 |            |
| Q9Z1R2 | Bag6    | Large proline-rich protein BAG6                                            | 117.64 | 5.2   | 21037  | 3  | 5869.0303   | 12811.2886 | 17186.8097  | 32995.859   | 15977.1933  | 16527.7194  | 19750.0582  | 21723.9339  | 17818.8636 | 13116.3765  | 19695.6544  | 17012.2365 | 15408.52   | 18543.3692 | 11272.298  | 18630.7157 | 19363.8475 | 15477.7395 | 10212.3821 |            |
| OS4962 | Ban1f   | Barricade autoinhibitory factor                                            | 195.52 | 66.67 | 10103  | 4  | 65865.2241  | 40524.0957 | 49171.7207  | 77182.2341  | 93021.7396  | 36738.7671  | 43606.0755  | 50282.8721  | 53036.5428 | 57423.1289  | 66027.1976  | 66432.545  | 75309.367  | 103859.471 | 70833.9398 | 71809.2105 | 47518.4133 | 68795.4135 | 66918.606  |            |
| Q9X1X3 | Basp1   | Brain-to-soluble protein 1                                                 | 834.73 | 78.32 | 10202  | 12 | 548429.251  | 285846.646 | 425319.51   | 597165.478  | 412027.348  | 584938.833  | 591330.589  | 524030.861  | 660078.951 | 32759.269   | 332402.964  | 503850.218 | 330096.807 | 425713.68  | 276647.602 | 34829.552  | 460006.831 | 288704.677 | 466950.492 |            |
| Q9Z713 | Bax     | Apoptosis regulator BAX                                                    | 356.61 | 40.62 | 21395  | 5  | 147327.686  | 1221.9453  | 103995.824  | 81708.6514  | 90010.1888  | 138977.568  | 186190.501  | 169890.344  | 174366.946 | 197519.013  | 192590.194  | 201376.602 | 160442.253 | 100423.251 | 100321.529 | 162525.943 | 166903.833 | 122785.242 | 168872.585 | 183062.197 |
| Q9Z277 | Baz1b   | Tyrosine-protein kinase BAZ1B                                              | 354.54 | 1.83  | 170651 | 2  | 0.47321321  | 4988.5859  | 5947.2593   | 0.02378711  | 3858.2174   | 0.03665204  | 4607.07612  | 0.03837823  | 0.0327065  | 2665.73384  | 4005.68903  | 4867.06734 | 7986.47003 | 0.03042376 | 4409.1032  | 0.03808805 | 4841.64058 | 4645.3827  | 3245.3509  |            |
| OS3855 | Bca2    | Branched-chain-amino-acid aminotransferase, mitochondrial                  | 344.26 | 17.56 | 44127  | 6  | 103640.441  | 22136.146  | 199095.797  | 98470.0009  | 66156.957   | 181329.536  | 18891.1448  | 219492.963  | 180055.249 | 148332.693  | 3151674.982 | 138749.713 | 142800.656 | 79861.1874 | 143598.205 | 173731.385 | 154722.99  | 146812.292 | 141724.724 |            |
| Q9CW13 | Bcep    | BRCA2 and CDKN1A interacting protein, mitochondrial                        | 37.34  | 3.8   | 35942  | 1  | 103650.5227 | 4609.1923  | 5433.7811   | 4157.90213  | 0.02510227  | 0.03665204  | 5681.43695  | 3959.58668  | 27.37631   | 0.033949434 | 4242.3615   | 0.03548508 | 7054.91648 | 6981.40515 | 0.03488812 | 4432.59511 | 5105.42103 | 0.03434898 | 4533.72211 |            |
| B57538 | Bckdhb  | 2-oxoisovalerate dehydrogenase subunit beta, mitochondrial                 | 69.84  | 2.82  | 42823  | 1  | 2182.0688   | 10108.4588 | 0.03070204  | 0.02587718  | 1722.25872  | 14273.2731  | 13657.1095  | 14337.3059  | 19589.8238 | 10873.3204  | 10170.7538  | 12091.9981 | 8919.87016 | 6137.70999 | 16045.0235 | 13217.9569 | 7956.69898 | 8870.16691 | 13708.8504 |            |
| OS5028 | Bckdk   | [3-methyl]-2-oxobutanate dehydrogenase [liponamide]] kinase, mitochondrial | 112.5  | 7.28  | 46588  | 2  | 19009.8243  | 30245.5928 | 32181.9413  | 27973.0397  | 15981.23    | 21678.5827  | 16460.527   | 12300.8846  | 26594.5905 | 24943.0508  | 24339.0213  | 34211.9176 | 27745.1106 | 24009.8391 | 37525.9875 | 27901.1713 | 23380.8724 | 31497.7873 | 24752.2475 |            |
| P53563 | Bcl2l1  | Bcl-2-like protein 1                                                       | 131.51 | 14.16 | 26158  | 2  | 18007.9232  | 11515.6418 | 13044.139   | 12419.2181  | 9344.32393  | 16648.0766  | 17750.9788  | 19276.6705  | 19022.5171 | 15999.5761  | 18721.0124  | 17711.6327 | 12928.3349 | 17101.8569 | 15852.9841 | 17452.2888 | 14231.5504 | 12812.7255 | 17963.9059 |            |
| P59017 | Bcl2l13 | Bcl-2-like protein 13                                                      | 41.92  | 4.65  | 46719  | 1  | 11221.3522  | 1188.12776 | 1127.2075   | 18499.9888  | 13529.0741  | 11347.1285  | 0.03877705  | 1604.64784  | 16781.7693 | 2700.162    | 0.03500571  | 12137.7236 | 1230.05765 | 0.03502376 | 14497.5685 | 1855.9059  | 10762.1102 | 5983.8047  | 11430.4719 |            |
| Q8K019 | Bclaf1  | Bcl-2-associated transcription factor 1                                    | 121.98 | 2.61  | 106002 | 2  | 0.47321321  | 7120.6449  | 20223.2509  | 37938.7112  | 36975.8917  | 12622.0711  | 9196.61788  | 11471.1574  | 12410.1746 | 11998.0277  | 1188.0316   | 13978.3202 | 9697.7265  | 13624.1962 | 11141.1785 | 13652.1194 | 12814.7599 | 12726.0041 | 16018.3797 |            |
| Q9CZ95 | Bcs1l   | Mitochondrial chaperone BCS1                                               | 65.91  | 4.55  | 47406  | 1  | 0.68221231  | 1778.95276 | 4241.1663   | 6929.16538  | 3688.7221   | 4285.7767   | 3189.6731   | 2557.0827   | 2996.25931 | 1774.7124   | 1962.69137  | 2109.73667 | 0.03620746 | 3199.12667 | 2570.3472  | 1983.08493 | 2526.61401 | 1937.48391 | 2390.73561 |            |
| Q80539 | Bcl2    | Myc box-dependent-interacting protein 1                                    | 257.22 | 14.12 | 64470  | 5  | 4626.51017  | 128748.016 | 13792.8433  | 49560.3607  | 69032.324   | 162823.9294 | 127138.763  | 161101.728  | 166049.217 | 17170.111   | 158700.12   | 15249.975  | 163740.843 | 136678.769 | 147612.118 | 166628.342 | 161775.904 | 166657.657 | 16022.1631 |            |
| B2Z6Q9 | Bcl2ip  | Bridging integrator 2                                                      | 201.39 | 9.2   | 52554  | 4  | 0.6822.4409 | 4065.6454  | 2401.1877   | 26388.3454  | 40097.0955  | 36108.9306  | 21599.3743  | 40141.9139  | 38297.2911 | 50166.368   | 48549.922   | 62873.6266 | 60688.6218 | 52189.2877 | 40531.9525 | 55734.2367 | 51243.6506 | 49939.5738 | 44441.9195 |            |
| OT2021 | Brc5    | Baculoviral IAP repeat-containing protein 5                                | 39.52  | 10    | 16298  | 1  | 0.47321321  | 2347.79399 | 2963.76317  | 9228.6331   | 2645.09561  | 0.03665204  | 0.03877705  | 0.03837823  | 1920.72048 | 2321.2776   | 2534.43004  | 2790.95411 | 2546.43428 | 3869.34283 | 0.03488812 | 3002.09497 | 1883.27086 | 2707.145   | 2953.4312  |            |
| OS8738 | Brc6    | Baculoviral IAP repeat-containing protein 6                                | 111.77 | 0.8   | 53200  | 3  | 0.47321321  | 11654.4632 | 1161.7553   | 10275.4336  | 19210.9476  | 18698.1189  | 13220.8056  | 13652.9516  | 17371.2311 | 16970.3956  | 20363.6814  | 16295.1943 | 14180.0687 | 18805.7847 | 18254.4144 | 16377.5786 | 15634.5784 | 11949.614  | 19343.7826 |            |
| Q8R016 | Blmh    | Bleomycin hydrolase                                                        | 445.03 | 25.71 | 52511  | 9  | 1.7423.798  | 11702.1164 | 40005.691   | 17067.3504  | 26945.831   | 72160.137   | 146965.99   | 132929.549  | 74545.1272 | 111236.916  | 102038.956  | 84300.3849 | 97136.6917 | 83662.2991 | 105626.411 | 102693.454 | 74194.7906 | 62745.0763 | 37781.1276 |            |
| Q9CY64 | Bhva    | Biriverdin reductase A                                                     | 357.3  | 18.64 | 33525  | 7  | 261829.2165 | 222924.076 | 199252.7481 | 4681.9859   | 3922.109332 | 1732        | 315639.348  | 325806.616  | 3126.953   | 182939.971  | 344686.342  | 333665.702 | 293438.825 | 351205.24  | 294304.416 | 277584.366 | 318724.8   | 137344.865 | 208382.297 | 27788.588  |
| Q9Z3D2 | Bhvb    | Flavin reductase (NADPH)                                                   | 862.01 | 69.42 | 22197  | 11 | 442573.729  | 177758.028 | 217023.835  | 178006.3328 | 83700.4341  | 308173.1782 | 310551.184  | 259975.795  | 28511.211  | 255945.182  | 260950.353  | 238035.417 | 234789.063 | 237933.698 | 268411.737 | 229167.656 | 246247.826 | 221301.702 | 20618.367  |            |
| OS4940 | Bnip2   | BCL2 adenovirus E1B 19 kDa protein-interacting protein                     | 69.71  | 6.72  | 37549  | 2  | 0.47321321  | 7371.2483  | 6895.3949   | 39071.5252  | 4484.1034   | 10234.7078  | 111661.6103 | 40655.8069  | 4881.17806 | 11406.9256  | 12365.949   | 10800.1063 | 19024.1715 | 12582.6759 | 10906.2169 | 12663.0827 | 6777.4202  | 10387.845  | 10822.7991 |            |
| Q9D8S9 | Bola1   | Bola-like protein 1                                                        | 105.43 | 17.52 | 14379  | 3  | 0.47321321  | 19419.8674 | 16792.3404  | 9048.46622  | 5809.36816  | 7216.24826  | 15223.4176  | 18996.1598  | 21079.7615 | 30932.6555  | 19939.96    | 19607.4886 | 34683.0104 | 24794.2378 | 19937.4565 | 27210.6518 | 22347.5167 | 18279.629  | 28489.1023 |            |
| Q8B522 | Bola2   | Bola-like protein 2                                                        | 91.62  | 20.93 | 10215  | 2  | 5690.30273  | 33764.9609 | 28909.6692  | 7255.25177  | 13916.6201  | 24775.6834  | 23100.348   | 24935.0215  | 24240.8801 | 4072.2771   | 33421.4924  | 31845.1086 | 34084.2204 | 41560.5691 | 28978.0442 | 31784.8665 | 21808.9845 | 37344.5532 | 22523.3895 |            |
| P97452 | Bop1    | Ribosome biogenesis protein BOP1                                           | 197.89 | 6.42  | 82546  | 4  | 0.47321321  | 33719.6238 | 32530.6412  | 95854.4005  | 88039.761   | 39191.2887  | 34237.8349  | 349033.9988 | 29843.4826 | 29632.8815  | 53092.7634  | 34172.6833 | 36102.9811 | 52627.6189 | 32771.9269 | 37607.9895 | 38261.3497 | 37615.2798 | 42536.8121 |            |
| Q8R164 | Bph1    | Valsalvacyclovir hydrolase                                                 | 82.81  | 7.9   | 23851  | 2  | 0.47321321  | 34419.2239 | 105622.4973 | 4810.69313  | 2183.84842  | 16699.8233  | 24685.9411  | 1116029.379 | 13444.682  | 10700.7459  | 7199.78566  | 10127.4899 | 9290.12551 | 11241.512  | 11564.3399 | 11462.2866 | 9263.7516  | 10632.6117 | 12007.0826 |            |
| Q9Z811 | Bpnl    | 3(2',5'-bisphosphosphate nucleoside)1                                      | 407.94 | 30.19 | 33196  | 7  | 4626.51017  | 128748.016 | 13792.8433  | 49560.3607  | 69032.324   | 162823.9294 | 127138.763  | 161101.728  | 166049.217 | 17170.111   | 158700.12   | 15249.975  | 163740.843 | 136678.769 | 147612.118 | 166628.342 | 161775.904 | 166657.657 | 16022.1631 |            |
| P46732 | Brc3    | Lysine-specific demethylase BRCC36                                         | 128.43 | 8.25  | 8330   | 2  | 0.47321321  | 10387.7649 | 6997.2322   | 0.02587718  | 0.02510227  | 10081.4168  | 13953.8278  | 13198.609   | 12911.1396 | 2637.75409  | 8231.36483  | 8856.55592 | 6734.32524 | 5929.8206  | 7160.52831 | 8460.70858 | 8418.05272 | 11782.3435 | 6229.16161 |            |
| Q6MG49 | Brd2    | Bromodomain-containing protein 2                                           | 108.11 | 4.26  | 38040  | 3  | 0.47321321  | 24389.3234 | 24932.4906  | 4244.1964   | 23672.3993  | 24337.1725  | 15218.5839  | 13262.3733  | 21529.7465 | 23397.5162  | 23047.3384  | 26927.8378 | 13866.607  | 31513.3543 | 23084.5026 | 31000.3289 | 22786.3608 | 21236.1941 | 26753.8539 |            |
| Q9ESU6 | Brd4    | Bromodomain-containing protein 4                                           | 86.07  | 1.5   | 155895 | 2  | 8584.85431  | 9837.0791  | 20505.0206  | 26695.4299  | 18870.3502  | 20391.7403  | 16006.1278  | 5475.16374  | 14626.3808 | 11759.739   | 17420.511   | 19257.6569 | 8255.13296 | 25420.488  | 17287.0788 | 21968.6275 | 16133.9177 | 13973.9175 | 16833.5126 |            |
| Q4Q0T6 | Brx1    | Ribosome biogenesis protein BRX1 homolog                                   | 199.78 | 13.07 | 41115  | 5  | 11818.0101  | 7907.7624  | 84085.8153  | 11581.7394  | 108382.244  | 45784.8861  | 48666.2434  | 53665.2949  | 54012.5519 | 5739.927    | 63825.0292  | 58770.564  | 61333.0739 | 5640.0621  | 55618.5797 | 84416.2678 | 52946.7081 | 68408.2103 | 62494.2726 |            |
| Q4V8K5 | Brox    | BROX domain-containing protein BROX                                        | 163.76 | 9.25  | 46192  | 3  | 0.47321321  | 26129.9374 | 13097.0596  | 0.02587718  | 0.02587718  | 39911.9829  | 56228.4689  | 45813.69    | 38987.6269 | 6098.5995   | 39364.7963  | 32914.5975 | 46951.0038 | 32189.1291 | 34954.8396 | 42431.7917 | 24637.3589 | 32989.7268 | 34167.0861 |            |
| P18572 | Bsg     | Basin                                                                      | 160.59 | 8.74  | 42445  |    |             |            |             |             |             |             |             |             |            |             |             |            |            |            |            |            |            |            |            |            |



|        |         |                                                                         |         |       |        |    |             |             |             |            |            |            |            |            |             |             |             |            |            |            |            |             |            |            |             |
|--------|---------|-------------------------------------------------------------------------|---------|-------|--------|----|-------------|-------------|-------------|------------|------------|------------|------------|------------|-------------|-------------|-------------|------------|------------|------------|------------|-------------|------------|------------|-------------|
| QSU2U0 | Ctpx    | ATP-dependent Clp protease ATP-binding subunit clpX-like, mitochondrial | 125     | 5.53  | 69208  | 3  | 612208.959  | 32656.9776  | 33504.4526  | 18054.2721 | 20260.4532 | 36066.9613 | 24537.0406 | 27927.7058 | 25949.0815  | 26346.446   | 29955.0261  | 20605.6489 | 9971.73767 | 33339.6072 | 33755.8897 | 36693.2325  | 27774.1707 | 26282.8217 | 26840.7402  |
| O0885S | Cita    | Citruhrin light chain A                                                 | 169.2   | 10.44 | 25604  | 4  | 160220.978  | 124089.385  | 117824.282  | 49465.702  | 47206.8717 | 145978.102 | 138743.442 | 150598.489 | 120041.522  | 138350.661  | 253053.5808 | 11966.187  | 130337.371 | 99827.7889 | 110490.676 | 145893.477  | 155002.882 | 134818.87  | 2112682.903 |
| O068D5 | Clec    | Citruhrin heavy chain 1                                                 | 4125.47 | 48.42 | 191557 | 66 | 1692370.43  | 1874883.39  | 1649234.68  | 1244737.82 | 1359879.46 | 2839099.04 | 2751414.03 | 2734587.3  | 2776992.92  | 2254584.97  | 236441.44   | 2143508.82 | 2145428.02 | 2321805.51 | 2250942.22 | 2398034.64  | 1827837.94 | 1979405.37 | 1174660.61  |
| QSS5V9 | Cluh    | Clustered mitochondria protein homolog                                  | 186.59  | 3.88  | 184008 | 4  | 773.82026   | 2001.8568   | 6654.2423   | 3836.18588 | 0.02510227 | 14058.7008 | 16682.1849 | 18464.4124 | 14305.1251  | 18974.3498  | 11842.8428  | 11796.484  | 20903.6427 | 15047.2986 | 20781.5208 | 15198.9417  | 7909.60139 | 10491.1671 | 1941.7621   |
| Q508K3 | Clyd    | Clydomycin A lyase, mitochondrial                                       | 80      | 13.02 | 3723   | 2  | 0.04731231  | 4071.4173   | 3684.89581  | 2860.82741 | 2463.90654 | 3772.66244 | 3734.34593 | 2081.87196 | 5856.37713  | 2787.18485  | 1534.87735  | 5302.68313 | 3884.01629 | 3206.66204 | 3509.02662 | 3889.89131  | 2879.67286 | 2899.1024  | 3885.40698  |
| O99PK2 | Cmas    | N-acetylmuraminic acid cytidylyltransferase                             | 283.52  | 15.51 | 48058  | 5  | 8443.9219   | 68598.7288  | 60384.812   | 8802.6357  | 52904.7098 | 76502.4508 | 62180.7902 | 63908.4697 | 72572.0348  | 14136.9947  | 81554.5968  | 69907.0175 | 80510.7681 | 60981.6667 | 64637.3382 | 47610.422   | 70438.7229 | 69147.0354 | 637838.3098 |
| Q4K473 | Cmpk1   | UMP-CMP kinase                                                          | 380.87  | 47.45 | 22169  | 8  | 0.11884.007 | 103958.529  | 84696.4708  | 72181.5398 | 64449.0304 | 12312.263  | 150728.11  | 115782.178 | 1101694.112 | 187427.525  | 186188.351  | 153817.801 | 150654.35  | 182793.99  | 152469.888 | 169226.271  | 99044.0411 | 140005.07  | 137967.862  |
| Q9C266 | Cnmf6   | CKLF-like MARVEL transmembrane domain-containing protein 6              | 52.11   | 6.01  | 19824  | 1  | 6321.33996  | 5561.64847  | 5425.54344  | 9687.36737 | 8203.48148 | 5294.12443 | 4724.77887 | 4242.3742  | 5043.60557  | 5005.73937  | 4263.40588  | 6668.36255 | 5441.71498 | 0.03502376 | 7254.46126 | 6624.43833  | 4798.91716 | 3854.47814 | 4883.70259  |
| Q5U2Z5 | Cnmr1   | Cap-specific mRNA (nucleoside-2'-O)-methyltransferase 1                 | 66.09   | 1.79  | 95169  | 2  | 0.04731231  | 12290.401   | 11813.8473  | 41914.3529 | 32487.8757 | 22915.7449 | 21924.3998 | 14532.7481 | 15015.8724  | 16033.7541  | 11428.2476  | 9192.02933 | 14362.7638 | 13765.6183 | 18940.8469 | 20808.7136  |            |            |             |
| P53996 | Cnbp    | Cellular nucleic acid-binding protein                                   | 330.92  | 43.26 | 19592  | 6  | 119473.039  | 169193.453  | 138278.055  | 69000.7307 | 91826.4134 | 167493.559 | 184064.668 | 176901.153 | 172906.644  | 195258.605  | 203677.832  | 249538.958 | 147676.371 | 142690.5   | 189067.511 | 226269.498  | 206602.779 | 184933.772 | 242665.205  |
| Q9D1A2 | Cndp2   | Cytosolic non-specific dipeptidase 2                                    | 63.925  | 35.37 | 52767  | 13 | 2.25731.927 | 289912.558  | 263695.304  | 118110.448 | 106798.374 | 506349.29  | 550766.65  | 512948.11  | 525888.605  | 4953970.970 | 41267.432   | 390511.662 | 425194.222 | 317779.45  | 323263.759 | 370982.856  | 317154.55  | 347718.53  | 351064.256  |
| Q6Z008 | Cnot1   | CCR4-NOT transcription complex subunit 1                                | 124.51  | 1.22  | 266808 | 3  | 0.04731231  | 12866.681   | 11260.1444  | 7146.5070  | 5473.53838 | 25167.5431 | 25987.4404 | 22487.3274 | 23775.1285  | 20656.462   | 21689.0785  | 20831.7296 | 20165.3456 | 16706.41   | 20170.0012 | 21399.9254  | 16618.273  | 11260.9917 | 17636.695   |
| Q8K0V4 | Cnot3   | CCR4-NOT transcription complex subunit 3                                | 47.01   | 2.53  | 81946  | 1  | 0.04731231  | 10311.1494  | 3123.31167  | 0.02587718 | 0.03665024 | 6369.92526 | 7076.94673 | 6534.22147 | 5810.930    | 967.96002   | 0.03545808  | 5069.5527  | 4386.32651 | 5287.20934 | 4915.89241 | 2030.93464  | 0.03434898 | 5558.5137  |             |
| P13223 | Cnp     | 2',3'-cyclic-nucleotide 3'-phosphodiesterase                            | 70.8    | 2.62  | 47268  | 1  | 0.04731231  | 6434.85488  | 7270.69201  | 8656.81662 | 6462.52534 | 8461.36967 | 5730.13841 | 5506.28446 | 9885.5441   | 7605.97092  | 5913.30531  | 6277.56914 | 3797.88109 | 5338.7446  | 7776.37659 | 5775.18861  | 6071.29058 | 3420.35283 | 710.27611   |
| Q9XK70 | Cnp2    | Protein capony homolog 2                                                | 164.08  | 15.38 | 20767  | 2  | 0.04731231  | 22775.902   | 209292.4729 | 0.02587718 | 12160.856  | 32349.7494 | 28018.2916 | 32246.8618 | 18315.4648  | 25451.5477  | 30159.6695  | 15206.8485 | 25811.0485 | 30374.202  | 261.13     | 8514.23117  | 4416.216   | 23154.8129 | 25877.4608  |
| O9DAU1 | Cnp3    | Protein capony homolog 3                                                | 245.03  | 10.87 | 30538  | 3  | 0.04731231  | 23956.2396  | 63249.6277  | 5802.9255  | 13990.792  | 60365.4335 | 35678.7255 | 13990.792  | 10040.8401  | 14136.9947  | 10064.8003  | 11599.2184 | 31755.7208 | 35496.7918 | 25183.7467 | 28361.5322  | 28012.9442 |            |             |
| Q9D8L7 | Coas    | Bifunctional coenzyme A synthase                                        | 248.51  | 14.03 | 62023  | 5  | 18004.9366  | 40951.7939  | 45488.1442  | 27071.2975 | 21581.7693 | 69839.3732 | 56646.0158 | 54291.6473 | 62529.744   | 56167.2009  | 36711.5564  | 5338.6331  | 53231.9032 | 62725.602  | 58328.4187 | 51121.064   | 5083.0245  | 95970.7108 | 43149.0615  |
| Q5U7L3 | Coil    | Coilin                                                                  | 49.94   | 1.75  | 61917  | 3  | 0.04731231  | 2399.2333   | 2131.7294   | 6055.2921  | 5101.1545  | 3506.7214  | 3666.50819 | 2647.6259  | 5499.80134  | 4688.8411   | 3621.38758  | 3959.9497  | 2489.05827 | 5887.30933 | 5541.2582  | 3484.81543  | 3917.90119 | 2100.51478 | 4195.43688  |
| Q8K408 | Colec12 | Collecitin-12                                                           | 588.97  | 14.96 | 81304  | 10 | 90002.1219  | 171636.308  | 195536.641  | 242041.73  | 251125.06  | 197205.227 | 199822.806 | 192077.99  | 209808.882  | 137943.054  | 122708.81   | 199350.459 | 174943.269 | 156097.976 | 182756.372 | 216896.03   | 173487.03  | 174231.952 | 225271.84   |
| Q8K297 | Colgal1 | Procollagen galactosyltransferase 1                                     | 564.14  | 21.07 | 71061  | 11 | 23491.971   | 24336.808   | 21607.4199  | 115746.099 | 93862.589  | 223455.446 | 209774.549 | 173104.946 | 223994.236  | 211391.042  | 185283.654  | 208521.762 | 19512.273  | 282509.731 | 220872.765 | 1906443.406 | 197256.161 | 190909.437 |             |
| Q3J2V7 | Comm10  | COMM domain-containing protein 10                                       | 42.59   | 5.94  | 22812  | 1  | 0.04731231  | 3465.20865  | 0.03700274  | 0.02587718 | 0.02510227 | 5333.89902 | 5598.5479  | 4976.18769 | 4209.89229  | 6152.73217  | 4458.3035   | 4002.87968 | 5302.19759 | 5099.20722 | 0.03488812 | 2546.97118  | 3968.41502 | 4591.6994  | 5862.41836  |
| Q88YX6 | Comm2   | COMM domain-containing protein 2                                        | 61.63   | 2.84  | 22848  | 2  | 0.04731231  | 27384.8303  | 30631.4498  | 57932.954  | 16367.4489 | 33064.1756 | 30570.0236 | 31114.433  | 39940.9936  | 28973.278   | 28130.8152  | 23406.2806 | 30993.0194 | 2077.9     | 1904.53    | 33196.8557  | 32529.058  | 33465.7029 | 21504.1305  |
| Q83289 | Comm3   | COMM domain-containing protein 3                                        | 75.8    | 12.31 | 20337  | 2  | 0.04731231  | 4969.0969   | 4557.47181  | 4877.29853 | 5941.91515 | 3883.97925 | 5830.98179 | 5398.4228  | 5489.5178   | 6023.42988  | 7419.46466  | 36753.6553 | 7007.20899 | 4732.72259 | 6688.32151 | 5581.76675  | 6560.36424 | 4334.74363 |             |
| P35444 | Comp    | Cartilage oligomeric matrix protein                                     | 38.6    | 1.06  | 82664  | 1  | 0.04731231  | 20915.4628  | 15248.9758  | 0.02587718 | 8024.71328 | 28354.1847 | 28236.7949 | 44564.7034 | 36268.7493  | 20516.1791  | 28136.1582  | 24179.4798 | 28165.9409 | 27243.066  | 25235.6127 | 20160.469   | 18996.7035 | 25589.4296 | 39784.3455  |
| O88587 | Cont    | Catechol O-methyltransferase                                            | 107.45  | 14.34 | 24986  | 2  | 7337.433    | 17075.14578 | 25270.2069  | 27492.536  | 21945.2988 | 30603.9414 | 24710.9919 | 27110.0237 | 33172.0032  | 33777.1944  | 24710.9919  | 34060.937  | 30045.0133 | 34474.6749 | 25330.2642 | 19851.2999  | 24169.2883 | 26452.5445 | 28046.4494  |
| Q8B1G7 | Contd1  | Catechol O-methyltransferase domain-containing protein 1                | 238.91  | 26.34 | 28961  | 4  | 0.04731231  | 30754.333   | 10756.2233  | 23063.0255 | 69958.6336 | 47621.4386 | 19446.6871 | 27441.3911 | 29395.8481  | 17303.5264  | 19272.4641  | 18620.5529 | 16112.6692 | 22038.1017 | 19001.0746 | 32266.7304  | 28587.4144 | 8429.95035 | 3831.06216  |
| Q8C1E6 | Copa    | Coatomer subunit alpha                                                  | 1255.51 | 23.2  | 138432 | 23 | 12636.933   | 105437.15   | 230653.978  | 175302.699 | 194221.259 | 354979.272 | 395356.134 | 296655.118 | 389797.15   | 386832.236  | 321479.175  | 302255.47  | 377599.515 | 307443.472 | 322625.716 | 336719.345  | 292362.11  | 321919.528 | 285236.065  |
| P23514 | Coph1   | Coatomer subunit beta                                                   | 65.77   | 1.27  | 107011 | 13 | 3064.39261  | 151552.166  | 92620.7047  | 115961.022 | 87233.6016 | 194272.072 | 200146.247 | 220487.177 | 180139.48   | 157282.186  | 121042.548  | 186071.515 | 168362.69  | 150691.112 | 152825.99  | 169999.974  | 166141.352 | 129436.22  | 169682.488  |
| O5142  | Coph2   | Coatomer subunit beta'                                                  | 80.77   | 26.52 | 102551 | 15 | 10064.127   | 219624.834  | 197948.307  | 87472.0885 | 109534.835 | 231453.54  | 222349.531 | 231676.295 | 288548.024  | 235887.47   | 233384.63   | 255902.014 | 190222.383 | 254227.253 | 284300.025 | 203531.001  | 201612.759 | 206255.358 |             |
| O89079 | Cope    | Coatomer subunit epsilon                                                | 321.85  | 21.75 | 34567  | 4  | 9894.95738  | 7197.56256  | 7102.77927  | 0.02587718 | 5380.94182 | 17497.7412 | 15747.1866 | 12400.6392 | 16046.2699  | 13045.7644  | 16875.3452  | 12637.0553 | 2174.01859 | 10576.7609 | 13309.9201 | 10430.9136  | 8333.0134  | 4937.55789 | 5868.91381  |
| Q4AEF8 | Copp1   | Coatomer subunit gamma-1                                                | 709.58  | 20.02 | 97614  | 12 | 152791.04   | 91457.6022  | 81699.8063  | 40441.4294 | 51466.2901 | 177621.577 | 176286.254 | 189715.253 | 20107.3388  | 135745.784  | 157461.25   | 167674.02  | 139519.101 | 116844.443 | 159381.888 | 174483.583  | 98763.4181 | 148668.666 | 150651.819  |
| P91203 | Copp2   | Coatomer subunit gamma-2                                                | 486.4   | 11.14 | 97681  | 8  | 121617.559  | 125654.957  | 992372.7027 | 70287.8896 | 74316.7453 | 219404.367 | 173513.41  | 204051.73  | 208835.152  | 136669.007  | 187233.691  | 165541.394 | 162535.805 | 239479.279 | 151614.972 | 181447.658  | 111309.774 | 175607.92  | 151530.638  |
| O88543 | Copp3   | COP9 signalosome complex subunit 2                                      | 73.66   | 2.93  | 51597  | 1  | 0.04731231  | 8293.57266  | 0.03700274  | 0.02587718 | 0.02510227 | 13629.3802 | 11719.6629 | 8197.8259  | 11719.6629  | 10607       |             |            |            |            |            |             |            |            |             |

|        |        |                                                    |         |       |        |    |             |             |             |             |            |            |            |            |            |            |             |            |            |            |            |             |            |            |            |           |
|--------|--------|----------------------------------------------------|---------|-------|--------|----|-------------|-------------|-------------|-------------|------------|------------|------------|------------|------------|------------|-------------|------------|------------|------------|------------|-------------|------------|------------|------------|-----------|
| Q91W50 | Csd1   | Cold shock domain-containing protein E1            | 1036.8  | 29.82 | 88791  | 18 | 260788.105  | 122193.381  | 237276.517  | 172501.072  | 174844.001 | 303189.171 | 295346.838 | 321346.663 | 272782.955 | 345303.694 | 284108.518  | 326320.129 | 333280.239 | 314772.124 | 283109.684 | 361945.172  | 313500.731 | 319673.822 | 313085.609 |           |
| Q9ERK4 | Cse11  | Exor-skp2                                          | 802.11  | 18.54 | 110455 | 15 | 69818.43712 | 12660.394   | 101157.774  | 120948.474  | 71322.9859 | 191734.08  | 315604.823 | 321910.483 | 257570.23  | 127731.356 | 51484.534   | 34222.691  | 149586.278 | 138293.715 | 119097.148 | 156901.522  | 151045.803 | 127372.872 | 114163.607 |           |
| P09581 | Csk    | Yeast protein kinase-stimulating factor 1 receptor | 539.56  | 14.84 | 109179 | 11 | 47860.9382  | 158218.356  | 184622.364  | 203475.789  | 221817.063 | 158117.091 | 117374.814 | 129897.778 | 152479.084 | 116500.546 | 84561.5345  | 141191.17  | 124358.629 | 132328.66  | 157015.426 | 152875.692  | 146667.382 | 154265.334 | 160999.125 |           |
| P41241 | Csk1   | Tyrosine-protein kinase CSK                        | 210.22  | 11.56 | 50716  | 6  | 85881.1394  | 5137.9061   | 64795.951   | 32341.48    | 40572.0272 | 83722.460  | 158729.724 | 118823.700 | 70127.880  | 71731.6281 | 11529.7949  | 20561.5046 | 77407.2999 | 58997.2371 | 69500.0561 | 74447.4803  | 64409.4691 | 69007.5923 |            |           |
| Q04686 | Csk1d  | Casein kinase I isoform delta                      | 86.58   | 6.75  | 47316  | 2  | 0.04731231  | 10296.1653  | 92020.13026 | 11162.4897  | 14219.184  | 4667.16386 | 11495.4596 | 10501.382  | 4961.29576 | 12439.5418 | 12877.466   | 12965.197  | 12206.5477 | 13102.3663 | 12147.8765 | 16787.3322  | 11706.5159 | 12379.944  | 15042.3098 |           |
| P19139 | Csk2a1 | Casein kinase II subunit alpha                     | 214.33  | 19.18 | 45073  | 5  | 105325.281  | 73899.2607  | 89748.2529  | 107143.243  | 59821.3759 | 80653.8018 | 141.3422   | 6788.17348 | 73438.9508 | 84623.31   | 92209.94    | 62962.3129 | 59704.9058 | 64594.3723 | 87081.0769 | 62808.1294  | 68453.6169 | 57944.3061 | 75946.2062 |           |
| Csk2b2 | Csk2b  | Casein kinase II subunit beta                      | 45.6    | 4.27  | 41515  | 1  | 0.04731231  | 2105.4035   | 551.18529   | 3927.76204  | 2007.0879  | 101.248198 | 1208.43799 | 669.886578 | 563.78274  | 209.911318 | 1373.949488 | 631.969098 | 1989.42299 | 0.0352762  | 1571.5688  | 758.74055   | 206.82075  | 149.0474   | 95859.59   |           |
| P67871 | Csk2b  | Casein kinase II subunit beta                      | 171.69  | 20.93 | 24942  | 4  | 72197.2323  | 64713.9658  | 67781.683   | 52275.7278  | 53156.800  | 51675.7657 | 62062.4782 | 47900.6291 | 59899.8019 | 78306.9601 | 55622.8059  | 63252.31   | 63435.3923 | 54549.1496 | 72185.5057 | 52750.0003  | 60814.7721 | 61170.8241 | 48707.0184 |           |
| P97315 | Cerp1  | Cysteine and glycine-rich protein 1                | 260.59  | 41.97 | 20583  | 6  | 82439.3904  | 51315.0034  | 51613.5035  | 26952.8657  | 37611.3651 | 56038.6831 | 52906.7337 | 48837.2177 | 70317.2868 | 6066.1399  | 61805.885   | 65894.4332 | 60218.305  | 55429.8002 | 38232.6172 | 68341.1131  | 45493.283  | 62607.3271 | 59510.3936 |           |
| P14241 | Cat3   | Cystatin-C                                         | 118.42  | 17.14 | 15437  | 2  | 0.04731231  | 21093.3999  | 11604.8879  | 7044.3156   | 5408.11666 | 15981.9036 | 20503.2333 | 18181.6927 | 7863.30523 | 17731.5861 | 19418.4267  | 5829.82172 | 15314.641  | 22719.8065 | 13193.6522 | 10353.7708  | 4244.13955 | 15465.1678 | 17030.5434 |           |
| Q62426 | Catb   | Cystatin-B                                         | 245.11  | 66.33 | 11046  | 4  | 1.68960.343 | 11095.7667  | 215013.45   | 82006.872   | 63834.236  | 279237.327 | 242776.767 | 239576.637 | 204681.9   | 349666.588 | 272.956     | 219256.5   | 281615.938 | 304422.602 | 336002.59  | 165690.672  | 140712.244 | 256620.46  | 95801.2665 |           |
| Q8BI05 | Catf2  | Cleavage stimulation factor subunit 2              | 199.91  | 12.24 | 61341  | 0  | 43414.939   | 5277.05862  | 931.61559   | 19730.3157  | 20310.2368 | 2315.0746  | 6811.19968 | 1161.9968  | 1161.9968  | 17157.6265 | 16571.1507  | 8155.32701 | 12489.1153 | 13538.1828 | 16250.677  | 11808.5077  | 9979.30002 | 15367.4027 | 62397.9392 |           |
| P09917 | Catf3  | Cleavage stimulation factor subunit 3              | 244.03  | 9.34  | 82877  | 7  | 23349.0505  | 24692.4716  | 23359.7150  | 23574.3055  | 30430.2260 | 2615.1264  | 2801.6754  | 22786.044  | 26546.255  | 53636.257  | 57.127      | 19289.2809 | 2653.6517  | 58888.1037 | 27789.2337 | 30294.7742  | 32641.048  | 28228.9265 | 28926.3586 |           |
| Q9R511 | Ctpe2  | Cytoplasmic reticulum export factor CTAGES         | 59.11   | 1.8   | 87718  | 1  | 0.04731231  | 4093.2764   | 4565.46091  | 4388.03982  | 4340.93444 | 0.03665024 | 6622.80865 | 9124.26485 | 6490.33304 | 4212.20097 | 4396.42997  | 5532.18111 | 3004.24267 | 4917.73648 | 5012.4338  | 6055.88124  | 6304.65728 | 4803.39935 | 5697.44173 |           |
| Q88712 | Ctbp1  | C-terminal-binding protein 1                       | 228.09  | 13.83 | 47745  | 5  | 43442.9245  | 86236.5945  | 86420.2367  | 50122.7495  | 60435.692  | 94069.0344 | 106181.943 | 102335.242 | 96016.748  | 93728.9490 | 97200.6731  | 88852.8211 | 99843.29   | 38010.8186 | 41483.4257 | 121181.35   | 83968.097  | 85448.0235 | 96048.2541 |           |
| P56546 | Ctbp2  | C-terminal-binding protein 2                       | 208.41  | 16.4  | 48957  | 7  | 5189.271    | 113524.858  | 118214.712  | 116762.6511 | 77610.2197 | 123631.207 | 131365.051 | 112606.37  | 111085.114 | 117322.766 | 116727.876  | 117053.482 | 132271.888 | 80649.8175 | 86387.754  | 137794.216  | 131640.351 | 114645.346 | 127371.447 |           |
| Q9VCN5 | Ctn    | Cystathionine gamma-lyase                          | 407.83  | 22.61 | 43567  | 6  | 55253.5272  | 95454.4141  | 71551.4479  | 34611.7208  | 45652.6357 | 165300.958 | 154726.218 | 124683.8   | 143337.916 | 114004.595 | 134617.944  | 88185.0213 | 112243.033 | 98401.6388 | 116101.994 | 98103.4259  | 79154.0278 | 89790.5851 | 79468.471  |           |
| P64824 | Cnmb1  | Beta-catenin-like protein 1                        | 89.81   | 2.84  | 64948  | 2  | 17759.7066  | 21457.735   | 12764.0913  | 17287.5749  | 11568.9821 | 28865.5678 | 27254.8975 | 21882.8782 | 18333.4891 | 22608.4228 | 10601.8176  | 17048.2231 | 19320.7920 | 14703.9811 | 14046.6975 | 20035.9233  | 20590.1108 | 13996.0426 | 24760.7137 |           |
| P30999 | Cnmd1  | Catenin delta1                                     | 200.81  | 6.18  | 104925 | 5  | 0.04731231  | 18658.5138  | 8128.8478   | 5561.3707   | 8582.93367 | 12542.0372 | 22666.0551 | 18658.7208 | 17458.0115 | 22200.877  | 18959.7577  | 51053.541  | 19513.204  | 2451.2459  | 40537.8529 | 25934.0786  | 16671.6836 | 14821.8285 | 14555.667  |           |
| P70698 | Cps1   | GTP synthase-1                                     | 300.54  | 13.54 | 66682  | 6  | 26875.1695  | 42401.9643  | 315430.7908 | 26784.0597  | 33754.7688 | 15129.9298 | 44038.9147 | 45645.4382 | 39902.0057 | 57999.4060 | 62655.6769  | 64077.7597 | 7632.0532  | 65128.3093 | 94284.1463 | 33539.2456  | 56344.8414 | 77489.5885 | 47811.9797 |           |
| P16675 | Csa    | Lysosomal protective protein                       | 1182.56 | 38.61 | 53844  | 19 | 97399.749   | 1317556.87  | 150296.11   | 1111506.97  | 995334.253 | 156995.13  | 1436583.9  | 1282838.64 | 1384459.12 | 1106684.1  | 1166238.19  | 1191929.16 | 1184740.46 | 108444.46  | 108264.784 | 1285203.88  | 133946.68  | 1122599.6  | 1160295.95 |           |
| P10605 | Csb    | Cathepsin B                                        | 1457.13 | 63.72 | 37280  | 21 | 49441.256   | 425383.263  | 473219.537  | 328905.235  | 266790.265 | 107496.84  | 1305461.32 | 112022.46  | 1130842.4  | 498882.132 | 586521.624  | 83765.144  | 62734.609  | 60838.287  | 556693.446 | 651447.834  | 592345.258 | 576604.53  | 60411.8432 |           |
| P97821 | Csd    | Dipeptidyl peptidase 1                             | 372.14  | 11.04 | 52376  | 5  | 62799.1081  | 193281.149  | 185465.667  | 97635.5459  | 94974.620  | 112875.805 | 135798.072 | 12920.564  | 122357.931 | 17014.564  | 135759.013  | 132697.794 | 163215.944 | 157100.093 | 142484.698 | 205553.011  | 188637.12  | 184178.232 | 211590.583 |           |
| P18242 | Csd    | Cathepsin D                                        | 1911.02 | 69.27 | 44954  | 30 | 24811.7574  | 226549.922  | 219426.349  | 1306699.7   | 1019315.46 | 1868152.74 | 425196.124 | 393046.594 | 386644.178 | 2454913.29 | 2609947.65  | 2180340.69 | 261063.63  | 2279856    | 1201142.7  | 2845294.94  | 1970797.99 | 261508.49  | 27548.918  |           |
| P06797 | Csl    | Cathepsin L1                                       | 90.76   | 9.58  | 37547  | 2  | 0.04731231  | 10331.1494  | 3732.36392  | 0.02587718  | 0.02510227 | 5510.36412 | 4656.17745 | 4922.7638  | 0.03727605 | 0.03074934 | 0.03500571  | 0.03545808 | 7430.6261  | 5391.27319 | 0.03488812 | 4680.37327  | 0.03396139 | 0.03434898 | 0.03500218 |           |
| O70370 | Cst    | Cathepsin S                                        | 1140.0  | 39.12 | 38475  | 8  | 901562.881  | 182758.931  | 17170.44    | 98998.9788  | 100306.801 | 188812.067 | 253432.812 | 200376.602 | 263025.462 | 157288.106 | 139770.338  | 150033.608 | 151995.269 | 161351.085 | 187016.456 | 1758285.805 | 126807.944 | 135761.563 | 159736.734 |           |
| Q9W107 | Cts    | cathepsin Z                                        | 758.66  | 53.92 | 33996  | 13 | 28156.817   | 123711.64   | 13720.78    | 16275.316   | 94270.570  | 16798.32   | 12325.417  | 84773.86   | 161018.76  | 104187.66  | 104187.66   | 104187.66  | 104187.66  | 104187.66  | 104187.66  | 104187.66   | 104187.66  | 104187.66  | 104187.66  | 104187.66 |
| Q9W107 | Ctsh   | C-terminal-like protein                            | 71.75   | 2.1   | 69841  | 1  | 0.04731231  | 4006.1278   | 0.037788    | 0.037788    | 0.037788   | 0.037788   | 0.037788   | 0.037788   | 0.037788   | 0.037788   | 0.037788    | 0.037788   | 0.037788   | 0.037788   | 0.037788   | 0.037788    | 0.037788   | 0.037788   | 0.037788   |           |
| Q9XCX9 | Cued2  | CUE domain-containing protein 2                    | 47.29   | 3.17  | 81852  | 1  | 0.04731231  | 5357.17664  | 2334.93002  | 402.40955   | 25041.021  | 6865.53702 | 3362.52378 | 8823.39020 | 7130.41609 | 3102.002   | 2017.054    | 9026.4231  | 15910.195  | 9172.6808  | 6607.8067  | 7371.28519  | 6752.40407 | 8041.61671 | 7968.31616 |           |
| Q9W726 | Cul1   | Cullin-1                                           | 158.66  | 6.1   | 31962  | 4  | 48124.8588  | 24897.1599  | 2441210.96  | 20485.908   | 39724.4328 | 73668.8847 | 28847.4620 | 7100.4625  | 1110.568   | 28180.552  | 24841.82    | 27555.9287 | 3414.8942  | 28251.4729 | 25110.477  | 25607.2832  | 19712.3995 | 30929.8257 | 13472.566  |           |
| Q9D4H8 | Cul2   | Cullin-2                                           | 49.27   | 1.74  | 86877  | 1  | 685.537937  | 1395.82591  | 0.03702004  | 0.02587718  | 0.02510227 | 4743.29501 | 4687.38041 | 4281.58927 | 5922.94491 | 2533.67988 | 0.03500571  | 2566.07543 | 2624.69197 | 2394.73955 | 1708.75134 | 3067.05166  | 2517.29823 | 1736.06251 | 407.18606  |           |
| BSD34  | Cul3   | Cullin-3                                           | 174.39  | 9.51  | 88329  | 4  | 0.04731231  | 7396.15357  | 9672.58432  | 0.02587718  | 864.004698 | 14272.5571 | 15701.1277 | 14326.2939 | 23417.682  | 12967.427  | 911327.3947 | 13749.2112 | 10112.1593 | 11175.1945 | 4171.69877 | 9964.73077  | 13872.6581 | 10808.627  | 11874.854  |           |
| Q3TCH7 | Cul4a  | Cullin-4a                                          | 145.64  | 3.82  | 87753  | 3  | 39306.3497  | 4071.314807 | 28066.6723  | 27610.2661  | 49471.9454 | 43539.631  | 41198.3453 | 34273.3151 | 44273.9478 | 9473.1777  | 35743.2529  | 39747.3420 | 36544.6668 | 30918.2962 | 31581.7578 | 38279.9614  | 36341.0115 | 40278.7196 | 39350.2384 |           |
| Q34432 | Cul4b  | Cullin-4B                                          | 138.72  | 3.2   | 106909 | 4  | 3195.1649   | 42401.9643  | 315430.7908 | 26784.0597  | 33754.7688 | 15129.9298 | 44038.9147 | 45645.4382 | 39902.0057 | 57999.4060 | 62655.6769  | 64077.7597 | 7632.0532  | 65128.3093 | 94284.1463 | 33539.2456  | 56344.8414 | 77489.5885 | 47811.9797 |           |
| Q9D335 | Cul5   | Cullin-5                                           | 161.96  | 23.3  | 90974  | 2  | 5161.96209  | 7183.30495  | 1171.92584  | 8860.0021   | 32974.8863 | 16615.2316 | 8940.8258  | 13178.1209 | 4427.9138  | 11933.4778 | 10093.8207  | 8909.29936 | 6546.88785 | 4010.9707  | 7259.25484 | 8216.83012  | 5735.05804 | 5537.67999 | 3279.23912 |           |
| Q6MGD0 | Cuta   | Protein Cuta                                       | 41.44   | 7.91  | 18659  | 1  | 0.04731231  | 7186.42266  | 4814.70676  | 0.02587718  | 0.02510227 |            |            |            |            |            |             |            |            |            |            |             |            |            |            |           |

|        |        |                                                           |         |       |        |    |             |            |             |             |             |             |            |            |            |             |             |            |            |             |            |             |            |             |            |
|--------|--------|-----------------------------------------------------------|---------|-------|--------|----|-------------|------------|-------------|-------------|-------------|-------------|------------|------------|------------|-------------|-------------|------------|------------|-------------|------------|-------------|------------|-------------|------------|
| Q81047 | Dds42  | ATP-dependent RNA helicase DDX42                          | 329.58  | 8.29  | 101965 | 7  | 20211.2664  | 8956.2488  | 43848.3983  | 48001.199   | 52532.5978  | 40909.8387  | 40913.3149 | 58507.402  | 48028.0952 | 44550.8172  | 55266.9778  | 50233.8574 | 41758.3351 | 55411.8415  | 57922.4187 | 46907.5116  | 50863.1921 | 42804.1368  |            |
| P56925 | Ddx46  | Probable ATP-dependent RNA helicase DDX46                 | 518.01  | 12.21 | 117448 | 12 | 289252.885  | 81635.0737 | 74835.4684  | 111356.229  | 91537.2854  | 96903.427   | 95062.2388 | 10191.347  | 9475.0361  | 114270.731  | 103250.538  | 96181.9172 | 101204.79  | 90993.4734  | 74048.4268 | 104145.285  | 95546.4766 | 110688.864  | 104910.839 |
| Q9CWX9 | Ddx47  | Probable ATP-dependent RNA helicase DDX47                 | 292.8   | 11.65 | 50639  | 5  | 13774.9819  | 53944.5274 | 36702.2432  | 54717.6249  | 56512.885   | 36532.3148  | 42869.7623 | 38083.5739 | 45284.113  | 50808.067   | 59296.6035  | 56073.9062 | 48049.2666 | 59359.0069  | 50510.2477 | 52342.7438  | 43043.6735 | 43984.7311  | 51177.2549 |
| Q4FEZ3 | Ddx49  | Probable ATP-dependent RNA helicase DDX49                 | 56.8    | 2.08  | 50494  | 1  | 26749.7145  | 10181.6771 | 9459.7155   | 6453.2008   | 6709.897    | 10998.48    | 10112.9487 | 9755.45053 | 9607.45671 | 8771.0678   | 9079.47265  | 11137.6938 | 11097.7229 | 8866.25999  | 10317.6466 | 8793.7738   | 7761.2899  | 9493.7231   | 28666.9828 |
| Q61656 | Ddx5   | Probable ATP-dependent RNA helicase DDX5                  | 1979.67 | 53.58 | 69290  | 35 | 2409494.05  | 2022091.19 | 2054484.24  | 2122748.33  | 1990284.12  | 2149797.05  | 2179906.64 | 2254402.54 | 228416.71  | 252214.78   | 2012719.91  | 217569.675 | 2375189.3  | 2318169.48  | 217569.675 | 2551240.61  | 2102574.43 | 2430345.35  | 2338426.88 |
| Q99499 | Ddx50  | ATP-dependent RNA helicase DDX50                          | 62.71   | 2.59  | 82175  | 2  | 4388.24938  | 17544.8944 | 13953.6892  | 20337.0132  | 226608.1259 | 135664.4311 | 13244.3363 | 4609.5398  | 79255.3984 | 18823.7924  | 17693.7851  | 16999.2244 | 14336.7962 | 16660.5333  | 16869.5333 | 14538.1228  | 15764.7895 | 16873.3538  | 15105.2922 |
| Q8K101 | Ddx52  | Probable ATP-dependent RNA helicase DDX52                 | 36.85   | 2.24  | 67474  | 1  | 0.04731231  | 8318.60277 | 6177.45508  | 1186.1567   | 8082.92012  | 10922.602   | 10765.5908 | 9745.4248  | 11353.4111 | 8777.10524  | 14725.5648  | 10464.2669 | 9838.1563  | 9907.1399   | 11003.121  | 8201.86199  | 9688.13343 | 12306.7332  |            |
| Q8K410 | Ddx54  | ATP-dependent RNA helicase DDX54                          | 265.75  | 8.35  | 97748  | 6  | 0.04731231  | 51103.7135 | 38439.964   | 53244.8485  | 46627.58428 | 42555.6882  | 44747.6525 | 36315.0168 | 39952.7667 | 47752.0126  | 38004.1485  | 35175.5397 | 45913.3975 | 40227.9893  | 40384.5283 | 44317.207   | 37600.3816 | 51596.9208  | 34544.6657 |
| Q9D044 | Ddx56  | Probable ATP-dependent RNA helicase DDX56                 | 105.90  | 9.89  | 61212  | 4  | 7626.996321 | 4141.7057  | 26482.8048  | 60649.1068  | 56607.57847 | 40556.225   | 32679.2303 | 36473.5189 | 39479.8797 | 39634.654   | 42986.2001  | 43820.260  | 36794.6204 | 43165.1785  | 49577.5007 | 43419.0005  | 41060.494  | 49663.9315  | 40138.4932 |
| P54823 | Ddx6   | ATP-dependent RNA helicase DDX6                           | 665.64  | 33.54 | 54192  | 11 | 8057.9538   | 11793.768  | 91548.6126  | 63281.8271  | 71832.2293  | 121453.156  | 145965.358 | 149999.481 | 121399.903 | 162892.656  | 150097.73   | 158795.92  | 152316.448 | 147748.678  | 150218.261 | 180720.538  | 115866.424 | 148697.948  | 153248.09  |
| Q9CQ62 | Dceer1 | 2,4-dienoyl-CoA reductase, mitochondrial                  | 110.5   | 2.25  | 36214  | 2  | 0.04731231  | 28370.97   | 16428.6232  | 16737.901   | 13446.2282  | 26874.5416  | 31275.724  | 30703.6027 | 25952.783  | 26189.668   | 19754.0768  | 24984.7127 | 20574.2589 | 21110.5148  | 28965.6917 | 25120.3418  | 22999.1295 | 24421.268   | 23679.2513 |
| Q90905 | Degs1  | Sphingolipid delta(4)-desaturase DES1                     | 43.48   | 5.57  | 38241  | 1  | 0.04731231  | 7189.0666  | 12436.348   | 11125.3276  | 10519.1973  | 3936.89673  | 3626.03697 | 3978.05467 | 5578.93514 | 4926.43645  | 7285.0707   | 5273.48659 | 7772.42111 | 7351.6594   | 8571.61716 | 5516.4688   | 4551.6935  | 5067.4732   | 6390.12789 |
| Q6AAX3 | Dek    | Protein DEK                                               | 210.5   | 10.38 | 42892  | 4  | 61196.1787  | 8281.7459  | 7650.23362  | 94511.98813 | 136643.4659 | 76823.3573  | 68523.9451 | 98813.3645 | 4099.5398  | 10653.448   | 10653.448   | 9603.8439  | 91688.5988 | 94975.8758  | 11008.922  | 8561.2431   | 10244.916  | 18222.6199  |            |
| Q9CQ16 | Dendr  | Density-regulated protein                                 | 159.59  | 17.68 | 22166  | 2  | 0.04731231  | 8588.23709 | 9447.73142  | 10713.1666  | 9782.72901  | 9735.71158  | 13145.3348 | 9923.67499 | 10521.801  | 12327.8080  | 11923.1853  | 14460.316  | 10497.8022 | 8306.6114   | 9279.26167 | 9479.17713  | 14000.3907 | 10596.2563  | 10258.0159 |
| Q91Y13 | Dera   | Deoxyribose-phosphate aldolase                            | 254.4   | 20.75 | 34975  | 5  | 17328.2373  | 4670.8493  | 39168.8398  | 8122.1496   | 20581.1661  | 51401.7777  | 61207.9443 | 52737.5125 | 48609.9156 | 49146.1988  | 44611.4808  | 56897.866  | 54525.5596 | 50164.148   | 43138.052  | 95585.8763  | 55505.5714 | 43082.9973  | 54191.2626 |
| O85650 | Dgkz   | Diacetylglycerol kinase zeta                              | 147.96  | 7.32  | 104050 | 6  | 0.04731231  | 20315.0434 | 25154.3589  | 15813.8468  | 21978.7773  | 30997.2672  | 31911.5681 | 32037.6977 | 29197.5115 | 29191.4299  | 33022.4974  | 29158.9819 | 29014.5671 | 32748.0974  | 34844.5495 | 32988.1084  | 26877.3736 | 29199.9246  | 23529.2676 |
| Q8B186 | Dgkyl  | D-glutamylase kinase, mitochondrial                       | 146.82  | 6     | 66366  | 3  | 5763.7208   | 2628.9252  | 21190.7012  | 15979.6645  | 4580.88967  | 11991.2564  | 14798.4444 | 16286.3152 | 16231.0373 | 19539.047   | 20428.9626  | 19821.7109 | 17122.9513 | 16132.6495  | 25096.1998 | 16230.3835  | 20866.2673 | 28906.6489  | 23478.671  |
| Q9XQ60 | Dgkuc  | Deoxyguanosine kinase, mitochondrial                      | 39.78   | 3.25  | 32281  | 1  | 0.04731231  | 16342.1247 | 16773.7273  | 14457.3527  | 8683.45571  | 20598.1566  | 14238.2097 | 16745.3848 | 18902.48   | 11325.2872  | 11489.41    | 16109.3398 | 11555.4355 | 12598.5492  | 10543.3205 | 10199.3406  | 10691.7836 | 12478.803   | 11099.7451 |
| O8B445 | Dher7  | 7-dehydrocholesterol reductase                            | 138.28  | 5.1   | 53919  | 2  | 8123.32339  | 27807.6759 | 240822.7115 | 43597.5134  | 37621.2617  | 21140.8389  | 14459.866  | 16438.0176 | 19452.8577 | 17412.2435  | 33123.2023  | 22628.1534 | 14238.5143 | 22602.6783  | 27345.0576 | 26230.1536  | 19356.395  | 18878.504   | 16971.3632 |
| O8B458 | Dhdh   | Trans-1,2-dihydrobenzene-1,2-diol dehydrogenase           | 57.41   | 3.6   | 36301  | 1  | 0.04731231  | 6109.98125 | 5440.16959  | 6025.87718  | 4642.55265  | 14855.4356  | 7022.96681 | 8741.04188 | 8596.9322  | 5432.80409  | 6926.94947  | 5853.9692  | 5717.69343 | 9625.15544  | 9255.28994 | 7340.37037  | 5306.58676 | 6040.11749  | 5740.258   |
| P00375 | Dhfr   | Dihydroorotate dehydrogenase (quinone), mitochondrial     | 233.1   | 33.69 | 42106  | 5  | 4421.32281  | 31790.9229 | 21616.1642  | 4592.80674  | 3427.0007   | 28572.9182  | 43729.6551 | 37638.6963 | 18217.4994 | 52063.9947  | 33554.6191  | 27539.1682 | 31127.3923 | 21578.4477  | 46647.8535 | 35196.4438  | 29775.148  | 35091.8224  | 33765.9326 |
| O35445 | Dhohd  | Dihydroxyacetone dehydrogenase (quinone), mitochondrial   | 167.87  | 9.62  | 42700  | 3  | 12280.9224  | 23106.522  | 27664.8685  | 38504.684   | 16050.1294  | 11997.5084  | 18817.8446 | 19697.5947 | 27947.7364 | 20629.9949  | 13754.4269  | 20910.3277 | 17410.3265 | 18972.0863  | 20925.6125 | 21194.9045  | 14357.6937 | 16930.562   | 15494.6387 |
| Q99104 | Dhrs1  | Dehydrogenase/reductase SDR family member 1               | 287.44  | 28.12 | 34005  | 6  | 18552.0429  | 31934.5294 | 42440.6601  | 42420.5292  | 40200.5373  | 61652.7525  | 39160.5534 | 62975.8163 | 58803.8524 | 27076.3981  | 44473.6384  | 40678.2612 | 36075.1918 | 40008.8105  | 43659.3674 | 41517.112   | 42240.7074 | 30762.3842  | 48982.116  |
| Q99182 | Dhrs1  | Dehydrogenase/reductase SDR family member 4               | 400.76  | 36.2  | 29885  | 8  | 58661.0311  | 89248.6594 | 80572.7243  | 33070.2041  | 41154.8643  | 77467.8242  | 79635.3626 | 70634.2838 | 69129.8105 | 81605.8147  | 69580.2004  | 72795.3687 | 78474.9945 | 60822.0583  | 94501.7806 | 78833.9506  | 75526.7393 | 81574.5755  | 83270.4342 |
| Q99147 | Dhrs7b | Dehydrogenase/reductase SDR family member 7B              | 231.71  | 17.03 | 34987  | 4  | 0.04731231  | 25826.7465 | 29808.9731  | 39923.6917  | 31061.003   | 38237.6908  | 2710.6267  | 29283.1344 | 37306.8656 | 26063.2645  | 29410.9085  | 24327.3689 | 18432.0061 | 36156.5511  | 33992.1782 | 30553.6015  | 23234.8809 | 19712.4195  | 28561.292  |
| Q58N86 | Dhrs9  | Dehydrogenase/reductase SDR family member 9               | 55.21   | 3.76  | 35242  | 1  | 0.04731231  | 4324.40801 | 6233.0449   | 6025.87718  | 11188.1668  | 15783.7598  | 1930.6127  | 11884.3798 | 13895.7123 | 5325.552468 | 9948.6354   | 71.1099248 | 7571.71464 | 10356.7077  | 6758.48247 | 0.035808005 | 0.03396139 | 6630.89026  | 0.03500218 |
| O35286 | Dhxs15 | Pre-mRNA-splicing factor ATP-dependent RNA helicase DHX15 | 129.57  | 30.31 | 91007  | 23 | 295026.727  | 408122.185 | 389265.618  | 519994.131  | 539106.92   | 423227.216  | 426768.191 | 416027.145 | 418107.248 | 513623.661  | 440649.171  | 467891.365 | 476141.742 | 420717.05   | 452751.855 | 487626.085  | 434295.343 | 4148683.887 | 389320.232 |
| Q5B180 | Dhx30  | ATP-dependent RNA helicase DHX30                          | 110.67  | 2.36  | 13997  | 3  | 0.04731231  | 12783.1933 | 12953.6557  | 6481.0666   | 12866.3929  | 12891.7686  | 15767.1818 | 11834.5314 | 14848.7071 | 13612.8790  | 146407.8543 | 15778.405  | 10895.778  | 18621.949   | 16521.6106 | 15162.8246  | 9019.2946  | 11552.853   | 14349.3651 |
| D4A228 | Dhx36  | ATP-dependent DNA/RNA helicase DHX36                      | 220.64  | 6.4   | 118348 | 4  | 0.04731231  | 23634.9369 | 148371.1178 | 6269.9302   | 12259.8737  | 23561.7863  | 22609.2297 | 19242.364  | 23833.1194 | 26033.2986  | 21131.6115  | 21676.4609 | 19041.5677 | 23367.9277  | 16020.0175 | 23510.9362  | 20297.291  | 16338.9577  | 27019.564  |
| Q6PD53 | Dhx57  | Putative ATP-dependent RNA helicase DHX57                 | 44.62   | 0.79  | 155762 | 1  | 21856.2285  | 3268.78576 | 3941.92865  | 6025877.118 | 1025310227  | 6174.50653  | 5275.76945 | 7108.78685 | 6229.3168  | 3385.9922   | 5154.23197  | 4972.97335 | 5351.01883 | 3998.87489  | 5423.04311 | 4712.83419  | 3559.31801 | 4696.50602  | 4138.88438 |
| Q70133 | Dhx9   | ATP-dependent RNA helicase A                              | 2133.99 | 27.17 | 149475 | 37 | 913302.591  | 902547.36  | 807842.366  | 1400022.54  | 114854.515  | 747649.536  | 686164.441 | 764916.278 | 7486.114   | 93838.538   | 657324.586  | 724579.308 | 799825.338 | 7314409.501 | 817253.96  | 869066.623  | 751063.6   | 948482.042  | 788378.385 |
| F1M775 | Diah1  | Protein diaphanous homolog 1                              | 115.93  | 2.69  | 140409 | 2  | 396.41908   | 5700.18297 | 5059.41491  | 70131.2514  | 6461.53844  | 9458.92093  | 5579.24894 | 6242.8208  | 11044.3338 | 634.84566   | 6992.97468  | 5094.82734 | 5214.19825 | 10500.6602  | 5731.47033 | 6271.20256  | 5617.65456 | 1437.52708  | 5900.56566 |
| Q8C9B9 | Dibd1  | Death-inducible oligomer 1                                | 92.65   | 1.37  | 47176  | 2  |             |            |             |             |             |             |            |            |            |             |             |            |            |             |            |             |            |             |            |



|        |         |                                                                  |         |       |        |    |            |            |             |            |            |             |            |             |             |            |             |            |            |             |            |            |            |            |             |
|--------|---------|------------------------------------------------------------------|---------|-------|--------|----|------------|------------|-------------|------------|------------|-------------|------------|-------------|-------------|------------|-------------|------------|------------|-------------|------------|------------|------------|------------|-------------|
| Q8RIQ8 | Dync1l1 | Cytoplasmic dynein 1 light intermediate chain 1                  | 437.14  | 22.18 | 56614  | 7  | 14588.0618 | 54420.5354 | 56953.2161  | 36021.0558 | 33899.7027 | 9131.6997   | 73894.9817 | 84001.8786  | 77428.8021  | 41690.524  | 80070.4949  | 75365.7824 | 77192.662  | 82300.6101  | 77470.7161 | 62949.2504 | 62437.6213 | 69638.2087 | 67995.6923  |
| Q62968 | Dync1l2 | Cytoplasmic dynein 1 light intermediate chain 2                  | 284.19  | 13.08 | 54745  | 5  | 14748.9368 | 36012.9227 | 29416.7661  | 20701.4124 | 21094.4339 | 41029.2706  | 49455.9616 | 50040.8096  | 48327.2384  | 71690.574  | 52105.0838  | 41000.4244 | 44254.5933 | 40940.9461  | 38477.766  | 32895.6282 | 36238.6519 | 38347.96   | 31148.5627  |
| P63167 | Dynll1  | Dynem light chain 1, cytoplasmic                                 | 36.26   | 12.36 | 10366  | 1  | 0.04731231 | 2184.9034  | 2133.4079   | 16352.807  | 22735.3442 | 22044.7253  | 31656.8717 | 26785.7496  | 14878.7615  | 29710.5558 | 23273.3692  | 23239.2091 | 35326.96   | 35420.5156  | 20767.7481 | 35967.0316 | 26927.8467 | 31021.734  | 28960.3891  |
| P02920 | Dynrlb1 | Dynem light chain rod-type 1                                     | 100.25  | 26.04 | 10990  | 2  | 0.04731231 | 9295.3227  | 6173.07945  | 6853.09863 | 6704.52842 | 11400.3065  | 15448.848  | 13690.7929  | 14787.1465  | 11458.2221 | 15728.9061  | 12433.1137 | 11492.6569 | 16336.7133  | 9778.7362  | 10542.834  | 8234.16454 | 8998.77431 | 11953.1438  |
| P51807 | Dynhl1  | Dynem light chain Fceta-type 1                                   | 61.35   | 15.93 | 12483  | 1  | 0.04731231 | 1328.81166 | 0.030770204 | 0.02587718 | 0.02510227 | 1946.45666  | 3265.22212 | 1830.83322  | 1082.4372   | 2779.4183  | 4766.68485  | 2160.69333 | 5290.78899 | 8545.3704   | 2603.44033 | 3226.39337 | 0.03396139 | 4012.7446  | 2848.3011   |
| P09193 | Ebn1    | Protein RNA-processing protein EBP2                              | 147.95  | 10.46 | 34703  | 3  | 59534.4993 | 5119.7066  | 36807.11726 | 69745.602  | 60598.6106 | 29462.4997  | 26635.3297 | 31746.5967  | 34392.9428  | 43244.0154 | 38641.7534  | 38062.7669 | 88002.6056 | 30231.4452  | 37556.4797 | 56873.2359 | 36837.1874 | 44562.2466 | 61433.4911  |
| O35459 | Ech1    | Elongation factor 1, diacylglycerol-CoA isomerase, mitochondrial | 213.73  | 10.4  | 36118  | 3  | 36152.13   | 52728.8704 | 59783.3268  | 43333.3371 | 35490.1027 | 58055.628   | 64527.9421 | 62651.7457  | 70919.9459  | 46726.239  | 61238.6544  | 46759.2684 | 48434.17   | 35279.7464  | 36617.1388 | 63921.6905 | 44572.4327 | 41813.9658 | 58729.0131  |
| P14604 | Echs1   | Enoyl-CoA hydratase, mitochondrial                               | 225.57  | 22.41 | 31516  | 4  | 25104.3637 | 34016.5179 | 24620.8605  | 33958.9365 | 10504.4144 | 61840.2185  | 56581.2166 | 46073.2296  | 49425.1498  | 48522.9452 | 10585.1606  | 50476.6402 | 56042.5346 | 46985.6276  | 42569.7677 | 47654.1293 | 46537.0395 | 50916.6474 | 44554.8541  |
| P42125 | Eci1    | Enoyl-CoA delta isomerase 1, mitochondrial                       | 527.1   | 41.87 | 32250  | 8  | 132046.53  | 152673.438 | 138420.098  | 105896.429 | 58650.5504 | 141302.439  | 156004.887 | 133917.841  | 166581.871  | 140644.465 | 131725.493  | 116892.024 | 137662.935 | 1206609.029 | 112372.559 | 141215.161 | 105969.617 | 136026.78  | 134169.259  |
| Q5X1C0 | Eci2    | Enoyl-CoA delta isomerase 2, mitochondrial                       | 69.63   | 2.3   | 43021  | 1  | 16840.1414 | 5213.6107  | 10575.0122  | 80877.822  | 105898.427 | 7443.47002  | 8046.55551 | 7920.8194   | 9426.86607  | 6277.12739 | 10332.7471  | 7596.08825 | 6948.58312 | 6018.41309  | 9312.87847 | 7946.50466 | 7443.24626 | 6598.12511 | 83169.522   |
| Q6P915 | Ecpas   | Proteasome adapter and scaffolding protein ECM29                 | 95.38   | 0.98  | 203703 | 2  | 25972.3763 | 14416.2236 | 12451.58171 | 2357.12961 | 0.02510227 | 3114.5846   | 25719.7818 | 29842.8637  | 28630.3719  | 23985.3521 | 20976.0712  | 16132.2778 | 16226.897  | 15930.1444  | 17450.0239 | 24651.5066 | 10964.7038 | 18093.537  | 19834.2447  |
| Q3ZAV8 | Ecd4    | Enhancer of mRNA-metabolism protein 4                            | 254.96  | 5.12  | 125396 | 4  | 0.04731231 | 23431.8089 | 27675.1567  | 8258.9565  | 20844.0214 | 45142.0685  | 39066.0343 | 35892.3597  | 44479.1647  | 29939.367  | 45247.9647  | 40331.0335 | 27847.3176 | 42117.7987  | 50530.1383 | 36229.5249 | 24664.6958 | 30456.9833 | 36246.6765  |
| P69736 | Edf1    | Endothelial differentiation-related factor 1                     | 104.07  | 16.89 | 16369  | 2  | 94336.5332 | 32997.6916 | 42252.28    | 21814.7959 | 38766.6686 | 37878.2433  | 38221.4508 | 33948.6581  | 30574.4884  | 33986.5282 | 36010.7243  | 31950.3814 | 37699.9006 | 31785.2526  | 31971.213  | 26367.3407 | 31665.6521 | 31723.3637 | 37407.37    |
| Q81B16 | Eed1    | Early endosome antigen 1                                         | 586.06  | 10.84 | 160915 | 12 | 59736.7298 | 115325.271 | 102767.781  | 84816.2163 | 78336.3091 | 194407.33   | 204629.358 | 199077.22   | 180488.185  | 187177.927 | 152863.251  | 171239.631 | 149372.491 | 143008.798  | 131086.007 | 134161.607 | 153913.571 | 156210.483 | 143188.266  |
| Q92126 | Eef1    | Polycomb target protein EED                                      | 90.1    | 6.58  | 10918  | 2  | 19529.499  | 4657.77928 | 5251.87888  | 6729.94187 | 11648.0259 | 5395.8568   | 940.97989  | 6432.07249  | 13798.442   | 5730.1058  | 6682.38595  | 7788.73376 | 14384.4904 | 4915.82744  | 11910.997  | 5160.67895 | 11418.9798 | 9609.30256 | 14561.6841  |
| O10126 | Eef1a1  | Elongation factor 1-alpha 1                                      | 2187.86 | 65.58 | 50114  | 32 | 25730804.8 | 19486717.1 | 19168700.7  | 11686624   | 15767993   | 20441472.2  | 20982994.2 | 18596411.7  | 19393894.4  | 22946346.8 | 19359647.7  | 20087865   | 22084848.8 | 2212026.6   | 21137564.8 | 21988363.9 | 22220935.1 | 22051478.9 | 2048962.1   |
| O70251 | Eef1b   | Elongation factor 1-beta                                         | 362.5   | 28.89 | 24694  | 5  | 1233231.67 | 4213.1163  | 4455789.316 | 220561.004 | 238671.455 | 41344.628   | 426333.996 | 455583.93   | 392227.141  | 611989.855 | 516026.293  | 555743.577 | 578725.267 | 522529.102  | 505567.17  | 60109.982  | 541792.985 | 548974.338 | 449007.957  |
| P57776 | Eef1d   | Elongation factor 1-delta                                        | 1088.8  | 56.94 | 31233  | 16 | 909210.738 | 974664.46  | 831348.655  | 396511.299 | 561632.191 | 970626.935  | 1226647.1  | 1101988.21  | 954745.868  | 1410551.4  | 1378459.22  | 1189638.7  | 1380676.3  | 1400988.57  | 1153015.86 | 1420398.62 | 120328.34  | 1289332.93 | 123809.34   |
| Q9D80  | Eef1g   | Elongation factor 1-gamma                                        | 1473.49 | 69.57 | 59061  | 24 | 1938319.26 | 2099997.9  | 1925514.18  | 1148887.6  | 1386548.61 | 2410999.18  | 2280072.44 | 2338422.38  | 21110189.24 | 28021.729  | 2554420.25  | 2449137.17 | 2815200.61 | 2799005.02  | 2201470.02 | 2886951.08 | 2582071.59 | 268341.18  | 2348189.63  |
| P58252 | Eef2    | Elongation factor 2                                              | 3752.25 | 10.9  | 95314  | 58 | 7298593.9  | 581651.29  | 1451943.79  | 2794788.71 | 304185.83  | 780789.95   | 6679164.97 | 677551.76   | 658862.45   | 1187651.6  | 14749227.76 | 7431223.9  | 5757576.93 | 312323.9    | 7303275.33 | 321855.75  | 819005.78  | 1576080.59 | 661665.21   |
| Q9JHW4 | Eefec   | Senescence-specific elongation factor                            | 237.89  | 12.69 | 63539  | 2  | 11153.298  | 67438.6704 | 54200.1692  | 33867.991  | 29641.5324 | 77129.0936  | 59210.5819 | 74787.8952  | 62857.7080  | 86191.571  | 73355.9366  | 69195.6912 | 72510.617  | 65069.9776  | 67651.759  | 73654.6382 | 747330.207 | 77467.5794 | 49250.984   |
| Q4FZY0 | Eefh2   | EF-hand domain-containing protein D2                             | 113.68  | 59    | 26579  | 18 | 100822.42  | 119424.75  | 97669.892   | 448472.913 | 648335.031 | 1306710.26  | 1743490.91 | 1340977.64  | 120006.8    | 1403644.47 | 1238917.56  | 1034790.46 | 919504.628 | 97920.091   | 1261605.35 | 763031.35  | 1148590.24 | 101278.47  | 101278.47   |
| O88810 | Eefh2L  | 116 kDa U5 small nuclear ribonucleoprotein component             | 933.4   | 25.23 | 10361  | 19 | 156252.87  | 66984.544  | 616638.142  | 52912.1201 | 54572.254  | 726131.083  | 671526.071 | 59744.482   | 552381.345  | 81126.765  | 798441.48   | 631115.467 | 790054.465 | 761183.343  | 709022.63  | 797255.27  | 804852.402 | 800874.05  | 661381.51   |
| Q9NM57 | Eefh11  | E1f domain-binding protein 1-like protein 1                      | 59.99   | 0.99  | 184834 | 1  | 0.04731231 | 4437.5001  | 60421.93795 | 5947.2075  | 5917.2074  | 8324.10728  | 63233.8334 | 35418.1051  | 8245        | 2101.67193 | 13555.1785  | 8487.407   | 9493.58222 | 6596.93543  | 7714.0086  | 7006.9611  | 80252.3504 | 60578.8291 | 61623.3911  |
| Q64126 | Ehd1    | E1f domain-containing protein 1                                  | 685.35  | 13.32 | 60703  | 13 | 87833.9243 | 86457.8667 | 73637.3442  | 3673.1642  | 62920.8105 | 170029.389  | 219631.114 | 230031.683  | 188514.55   | 142465.838 | 156926.118  | 128706.992 | 142645.788 | 116481.895  | 130543.357 | 164807.524 | 123399.688 | 152225.952 | 147524.323  |
| Q8R491 | Ehd3    | E1f domain-containing protein 3                                  | 345.1   | 33.08 | 60661  | 7  | 58944.8754 | 6139.12445 | 54133.304   | 34039.269  | 6160.4318  | 141802.522  | 175534.857 | 170585.891  | 133699.635  | 118403.587 | 133906.891  | 108964.448 | 113802.28  | 99408.5195  | 103101.18  | 138267.669 | 9361.282   | 101479.535 | 125405.876  |
| Q9EQP2 | Ehd4    | E1f domain-containing protein 4                                  | 849.75  | 35.86 | 61481  | 17 | 114583.578 | 200243.756 | 153797.982  | 112671.347 | 133306.22  | 349785.53   | 382373.848 | 386847.803  | 376891.907  | 317170.58  | 306027.201  | 293872.016 | 313245.166 | 267426.574  | 274527.224 | 305839.996 | 226669.901 | 297976.62  | 279829.983  |
| Q3DW34 | Ehmt1   | Histone-lysine N-methyltransferase EHMT1                         | 52.54   | 11.66 | 141999 | 1  | 7167.1415  | 10627.2489 | 3404.24034  | 5862.35798 | 61167.9326 | 67557.9212  | 67033.5019 | 188480.985  | 3167.5816   | 23380.9607 | 35457.9013  | 37393.5577 | 26536.0689 | 25194.7147  | 11494.3859 | 31403.7385 | 3431.7733  | 22975.5107 | 63532.3061  |
| P48023 | Eif1    | Eukaryotic translation initiation factor 1                       | 121.94  | 15.13 | 12747  | 2  | 0.04731231 | 11694.4143 | 159853.004  | 10022.8795 | 2728.63082 | 5368.53174  | 4780.399   | 6011.85657  | 5254.53035  | 11890.7374 | 12751.3099  | 9571.68118 | 12877.958  | 30985.139   | 12622.202  | 16679.7762 | 12881.4568 | 16144.967  | 14541.526   |
| Q8BM5  | Eif1ax  | Eukaryotic translation initiation factor 1A, X-chromosomal       | 257.75  | 36.81 | 16460  | 5  | 30953.1949 | 45666.1185 | 26257.6877  | 20597.0321 | 21414.96   | 27769.2655  | 59162.5726 | 52267.2531  | 45011.6132  | 60874.6344 | 40054.8712  | 55531.9089 | 64397.5864 | 43498.0217  | 54446.8172 | 53163.5224 | 44526.1672 | 53163.5224 | 44526.1672  |
| Q8JW16 | Eif2a   | Eukaryotic translation initiation factor 2A                      | 833.1   | 38.73 | 64403  | 17 | 152126.172 | 25573.2611 | 264320.582  | 323095.948 | 295173.803 | 308476.132  | 307325.67  | 313096.667  | 281106.852  | 33989.249  | 27180.5143  | 286859.826 | 350763.773 | 310165.921  | 298067.611 | 285298.172 | 288308.751 | 304780.413 | 327393.071  |
| Q03963 | Eif2ak2 | Interferon-induced, double-stranded RNA-activated protein kinase | 382.11  | 19.81 | 58280  | 6  | 12003.5977 | 22220.2163 | 19751.4525  | 19025.369  | 14637.893  | 192113.8894 | 37177.0073 | 38119.94719 | 34184.1719  | 32210.5403 | 32112.0492  | 26306.9424 | 32019.5038 | 44010.64177 | 28883.9422 | 34743.5293 | 30438.3525 | 33240.7428 | 350047.1372 |
| Q991C8 | Eif2b1  | Translation initiation factor eIF-2B subunit alpha               | 98.49   | 5.57  | 33816  | 1  | 0.04731231 | 2663.67789 | 1830.56775  | 0.02587718 | 1820.46344 | 4237.77867  | 6169.64121 | 5992.25319  | 6380.93201  | 4465.68973 | 6517.25843  | 3972.08842 | 5237.62557 | 8032.3326   | 5338.7482  | 5809.59336 | 4371.04663 | 4047.26232 | 5298.72856  |
| Q01749 | Eif2b2  | Translation initiation factor eIF-2B subunit delta               | 211.27  | 9.92  | 37624  | 4  | 12347.7362 | 30266.6013 | 64266.0688  | 19459.6652 | 27518.1282 | 61081.5769  | 5515.2517  | 62244.3612  | 52755.374   | 75408.9046 | 7880.83598  | 74669.2044 | 79066.5611 | 80252.3504  | 60578.8291 | 61623.3911 | 68525.2964 | 71817.2824 | 62804.0244  |
| P88101 | Eif2c1  | Eukaryotic translation initiation factor 2 subunit 1             | 875.77  | 56.19 | 36108  | 15 | 47763.351  | 52550.2354 | 66440.575   | 26282.451  | 32018.82   | 727978.328  | 810457.038 | 728704.127  | 640602.379  | 311830     | 357619.491  | 80661.899  | 821692.763 | 655999.414  | 539645.505 | 620197.126 |            |            |             |

|        |         |                                                                         |         |       |        |    |            |             |            |            |             |             |             |            |            |             |             |            |            |            |            |             |             |            |            |
|--------|---------|-------------------------------------------------------------------------|---------|-------|--------|----|------------|-------------|------------|------------|-------------|-------------|-------------|------------|------------|-------------|-------------|------------|------------|------------|------------|-------------|-------------|------------|------------|
| P48193 | EpH41   | Protein 4.1                                                             | 214.64  | 8.16  | 95911  | 6  | 43360.4522 | 57525.2818  | 45138.3882 | 34870.1768 | 40461.7216  | 66460.4022  | 60277.4211  | 60969.6133 | 84006.695  | 59230.9055  | 59725.5372  | 57409.058  | 58141.7889 | 51185.1608 | 41090.8646 | 61737.3983  | 49133.8843  | 60104.7001 | 48257.8179 |
| O70318 | EpH412  | Band 4.1-like protein 2                                                 | 480.88  | 13.46 | 109940 | 10 | 113879.748 | 7342.0024   | 9550.866   | 107948.586 | 51455.532   | 104910.871  | 90971.327   | 149681.18  | 104038.316 | 66215.5074  | 79838.2145  | 95379.0754 | 84511.4393 | 73047.3754 | 76514.7467 | 83782.7398  | 89097.4637  | 78286.0116 | 75806.145  |
| Q8CCG7 | Eprs    | Bifunctional glutamate/proline-rRNA ligase                              | 2295.82 | 34.06 | 170079 | 37 | 966482.863 | 748043.68   | 752998.963 | 612806.475 | 661720.66   | 1222662.58  | 1112557.27  | 1180801.71 | 1055982.87 | 1068431.41  | 942032.227  | 1023321.88 | 1008333.54 | 89504.219  | 926184.447 | 930730.787  | 961814.119  | 951203.467 | 851341.244 |
| P42561 | Eps15   | Epidermal growth factor receptor substrate 15                           | 51.17   | 1.23  | 94476  | 1  | 0.04731231 | 3735.35933  | 0.03070204 | 0.02587774 | 1424.39242  | 3914.10174  | 5460.51128  | 4767.29651 | 3480.68182 | 3923.42821  | 5461.0398   | 4835.56053 | 716.13641  | 5084.82611 | 6988.56859 | 2705.399    | 0.03396139  | 3696.07128 | 4639.52758 |
| Q60902 | Eps15l1 | Epidermal growth factor receptor substrate 15-like 1                    | 40.21   | 0.88  | 99309  | 1  | 0.04731231 | 4212.00139  | 0.03070204 | 0.02587774 | 1424.39242  | 3914.10174  | 5460.51128  | 4767.29651 | 3480.68182 | 3923.42821  | 5461.0398   | 4835.56053 | 716.13641  | 5084.82611 | 6988.56859 | 2705.399    | 0.03396139  | 3696.07128 | 4639.52758 |
| Q9EQH2 | Erln1   | Endoplasmic reticulum aminopeptidase 1                                  | 290.12  | 7.96  | 106599 | 6  | 122366.93  | 921.5756    | 4560.10055 | 41496.023  | 10025.1127  | 90322.76465 | 7160.76007  | 6322.82997 | 8200.89364 | 4899.65035  | 3291.47929  | 6739.19483 | 5947.95613 | 5406.5344  | 6330.83473 | 3989.30654  | 6283.64128  | 6357.56169 |            |
| Q80172 | Erbin   | Erbin                                                                   | 48.17   | 0.86  | 157248 | 1  | 0.04731231 | 5893.1881   | 3503.4695  | 10786.9874 | 10362.2477  | 6125.57498  | 6179.44094  | 5992.87367 | 6222.46364 | 4466.7174   | 5096.0782   | 5720.36157 | 5037.68398 | 7135.83964 | 6319.28287 | 5063.21583  | 4802.12753  | 5651.57071 | 6642.29796 |
| Q9DC16 | Ergic1  | Endoplasmic reticulum-Golgi intermediate compartment protein 1          | 136.17  | 1.0   | 32562  | 3  | 30088.0864 | 39481.1889  | 56157.6268 | 64310.6327 | 69066.0847  | 69137.0515  | 5279.4266   | 40908.8787 | 5929.82601 | 3818.991    | 5406.07021  | 39530.2438 | 42025.7887 | 46494.9578 | 43014.3296 | 46373.8425  | 42862.481   | 43190.8831 | 15338.371  |
| P84089 | Erh     | Enhancer of rudimentary homolog                                         | 209.68  | 41.35 | 12259  | 3  | 62900.5516 | 75007.9562  | 96051.9182 | 260698.801 | 158963.464  | 59226.2228  | 37689.4607  | 40177.9898 | 49381.4854 | 70003.5853  | 46431.8577  | 58814.7049 | 73097.942  | 115374.19  | 98408.884  | 22746.859   | 36952.6137  | 76544.6814 | 47153.276  |
| Q8VEH8 | Erlec1  | Endoplasmic reticulum lectin 1                                          | 38.11   | 1.66  | 54906  | 1  | 0.04731231 | 5696.91045  | 4009.72074 | 2910.77075 | 3744.27142  | 5654.50088  | 4193.37046  | 4623.23805 | 5198.66777 | 3564.24345  | 3963.60721  | 4424.98417 | 2710.90103 | 3112.0963  | 0.03488812 | 4348.3095   | 2972.03001  | 4104.79326 | 5565.361   |
| BSDH2  | Erln2   | Erln-2                                                                  | 170.79  | 14.45 | 37710  | 4  | 20521.0469 | 45939.4244  | 57461.6849 | 65537.748  | 88629.3192  | 59017.9121  | 39084.8855  | 46117.549  | 52339.8574 | 19915.8095  | 23427.1027  | 34998.8432 | 32382.7956 | 35177.8223 | 43396.0537 | 38222.6151  | 43077.8387  | 36914.713  | 38634.9439 |
| Q9UW00 | Ermp1   | Endoplasmic reticulum metalloproteinase 1                               | 79.44   | 1.5   | 100148 | 1  | 0.04731231 | 10331.1494  | 0.03070204 | 0.02587774 | 1424.39242  | 3914.10174  | 5460.51128  | 4767.29651 | 3480.68182 | 3923.42821  | 5461.0398   | 4835.56053 | 716.13641  | 5084.82611 | 6988.56859 | 2705.399    | 0.03396139  | 3696.07128 | 4639.52758 |
| QR8180 | Ero1a   | ER01-like protein alpha                                                 | 441.6   | 17.89 | 54084  | 8  | 23735.3909 | 76972.4293  | 36945.176  | 14413.909  | 14492.9006  | 66691.851   | 39564.9712  | 96469.3973 | 72655.5033 | 86669.7525  | 100421.1448 | 63750.1769 | 90833.579  | 62923.5786 | 70912.1983 | 99536.5743  | 68422.9678  | 72639.0745 | 87323.2493 |
| QR829E | Ero1b   | ER01-like protein beta                                                  | 173.28  | 8.99  | 53518  | 4  | 13746.8992 | 32682.9598  | 14640.2842 | 2721.76058 | 4858.38749  | 21993.1104  | 39968.9016  | 43140.9387 | 32512.5916 | 3901.5912   | 23326.9884  | 25158.6457 | 42514.2771 | 30058.1409 | 24300.1923 | 43396.1048  | 28036.1871  | 31488.1804 | 39041.7832 |
| P57759 | Erp29   | Endoplasmic reticulum resident protein 29                               | 459.01  | 45.04 | 28823  | 8  | 32193.9161 | 451751.529  | 34077.541  | 95869.6675 | 85792.1226  | 323582.34   | 333540.703  | 286715.815 | 299982.388 | 386307.417  | 332645.771  | 316447.501 | 300053.376 | 290310.827 | 391341.782 | 356076.071  | 277366.426  | 345691.665 | 32857.077  |
| Q9D1Q6 | Erp44   | Endoplasmic reticulum resident protein 44                               | 40.22   | 56.07 | 46853  | 1  | 0.04731231 | 8127.90658  | 7227.56199 | 5057.04468 | 6831.58177  | 7413.35269  | 90855.54667 | 6834.0839  | 7840.6819  | 95290.6139  | 6595.03854  | 9908.00128 | 7767.8233  | 12853.635  | 9094.61297 | 10517.9339  | 9468.85949  | 7188.70812 | 8301.26274 |
| Q9R0P3 | Esd     | S-formylglutathione hydrolase                                           | 950.34  | 68.44 | 31320  | 14 | 485942.65  | 417525.588  | 419964.707 | 271543.504 | 355420.557  | 806776.236  | 76163.191   | 784749.99  | 776601.392 | 6159696.031 | 651153.36   | 596963.188 | 682824.69  | 653787.663 | 51336.968  | 576890.371  | 512159.976  | 511964.03  | 544837.023 |
| Q3V1V3 | EsF1    | ESF1 homolog                                                            | 48.98   | 1.42  | 98048  | 1  | 0.04731231 | 17344.1719  | 17015.7957 | 12344.8132 | 11311.1017  | 23388.8003  | 26149.6425  | 25621.9872 | 26555.7785 | 24499.2557  | 20954.2174  | 14878.8491 | 22875.1436 | 22587.6479 | 25793.9448 | 25474.8701  | 140530.7906 | 25948.1146 | 21911.4859 |
| Q1U7R1 | Esyt1   | Extended synaptotagmin-1                                                | 712.54  | 16.94 | 121554 | 12 | 96180.6130 | 13343.9707  | 82104.9048 | 145821.285 | 128101.629  | 115632.0207 | 98936.3153  | 112753.329 | 139408.919 | 7059.2523   | 110167.354  | 68800.1253 | 99471.3171 | 98768.6154 | 96131.2174 | 70930.3501  | 72913.0064  | 97104.8859 |            |
| Q3TZT7 | Esyt2   | Extended synaptotagmin-2                                                | 47.57   | 1.78  | 94139  | 1  | 0.04731231 | 15313.10871 | 4402.15248 | 6607.9505  | 45403.4503  | 5743.59138  | 4025.03055  | 4850.93039 | 6211.2025  | 28274.9397  | 987.98568   | 5280.66366 | 2839.82874 | 5436.1255  | 4841.79854 | 5081.46781  | 0.03396139  | 3262.59433 | 5127.48881 |
| Q9U5Q7 | Esyt1   | Eukaryotic pyroglutamate release factor subunit 1                       | 304.23  | 22.43 | 90321  | 6  | 146979.314 | 11615.76    | 128881.792 | 6107.9683  | 138089.2129 | 178076.791  | 155828.618  | 153893.682 | 144683.687 | 262.94379   | 184905.462  | 197898.309 | 218142.646 | 184304.504 | 200459.512 | 195787.217  | 141951.334  | 189069.166 | 167941.183 |
| Q9YLCS | EtfA    | Electron transfer flavoprotein subunit alpha, mitochondrial             | 1106.02 | 67.87 | 35009  | 18 | 38593.945  | 41702.874   | 449498.101 | 303752.004 | 179076.055  | 402754.588  | 424159.496  | 423944.728 | 427342.533 | 396893.844  | 454393.601  | 440355.99  | 382855.714 | 386664.144 | 472847.588 | 422663.603  | 409500.813  | 334331.976 | 522688.177 |
| Q9DCW4 | EtfB    | Electron transfer flavoprotein subunit beta                             | 778.22  | 49.41 | 27623  | 13 | 848943.907 | 411972.814  | 594186.541 | 368747.386 | 273671.174  | 625838.958  | 634674.666  | 96010.922  | 596999.322 | 589608.764  | 584492.949  | 544532.386 | 576559.083 | 492490.855 | 632127.882 | 660303.533  | 518930.824  | 568837.426 | 59008.706  |
| Q921G7 | EtfH    | Electron transfer flavoprotein-ubiquinone oxidoreductase, mitochondrial | 250.76  | 10.55 | 68091  | 5  | 0.04731231 | 61971.1212  | 65355.9843 | 8101.9562  | 81369.6611  | 65423.4571  | 63319.6214  | 62898.1723 | 66824.4583 | 40510.154   | 34047.8889  | 43094.2328 | 48229.444  | 40150.3190 | 49268.3352 | 55921.9251  | 53178.8427  | 51212.7059 | 54958.9856 |
| Q9DCM0 | EthE1   | Persulfide dioxygenase ETHE1, mitochondrial                             | 311.54  | 29.92 | 27739  | 5  | 50302.1752 | 105449.668  | 92380.7836 | 33327.260  | 25628.5439  | 85141.4125  | 19945.014   | 117589.543 | 103210.217 | 84008.956   | 97969.8052  | 65462.6868 | 85467.7145 | 64637.9156 | 103365.623 | 95250.3647  | 88128.5538  | 76712.8282 | 82715.6847 |
| P97360 | Etv6    | Transcription factor ETV6                                               | 50.2    | 1.44  | 56046  | 1  | 0.04731231 | 5445.41131  | 5237.9455  | 3322.8007  | 3422.5819   | 9373.64665  | 8625.20256  | 9030.31794 | 9872.44038 | 7625.02504  | 7033.58572  | 10132.9853 | 9963.62282 | 7262.76189 | 11835.8433 | 5531.42558  | 8571.89374  | 9179.39204 |            |
| Q61545 | Ewsr1   | RNA-binding protein EWS                                                 | 219.7   | 10.38 | 68462  | 4  | 39825.493  | 73186.2473  | 94672.456  | 63381.7389 | 63736.0623  | 87055.4095  | 74109.2321  | 68994.9912 | 70926.1588 | 91725.3083  | 82088.9239  | 81653.6255 | 80993.0402 | 83800.225  | 80048.0587 | 80351.026   | 84905.8983  | 77894.8025 | 82736.5722 |
| Q9D4H1 | Exoc2   | Exocyst complex component 2                                             | 116.22  | 2.92  | 103599 | 3  | 8990.14792 | 7942.31994  | 12706.0701 | 11467.1288 | 10552.69149 | 13165.0352  | 13309.7654  | 25300.4657 | 29783.3395 | 16193.2958  | 13163.2153  | 9918.58405 | 9864.19534 | 3921.47412 | 12759.777  | 22383.711   | 14660.8902  | 9181.4477  | 18464.3753 |
| Q62825 | Exoc3   | Exocyst complex component 3                                             | 39.4    | 1.46  | 86497  | 1  | 0.04731231 | 2251.7577   | 1061.29877 | 3076.1136  | 6089.20926  | 8004.32052  | 6109.79367  | 5085.13928 | 5860.681   | 5661.34032  | 5327.94446  | 4380.6398  | 5024.13677 | 4052.8684  | 3599.24818 | 5010.28011  | 2430.9266   | 3809.09523 | 3205.83858 |
| O53582 | Exoc4   | Exocyst complex component 4                                             | 109.49  | 3.38  | 110545 | 4  | 0.04731231 | 1880.3468   | 1718.94252 | 3171.5408  | 2451.53246  | 3240.61066  | 4002.79365  | 4070.86187 | 6178.53477 | 3398.89732  | 3389.66713  | 3353.74084 | 2732.32993 | 4980.93039 | 3005.20724 | 3433.25259  | 2935.81341  | 2257.98328 | 3501.08916 |
| Q8U4A6 | Exoc5   | Exosome complex component CSL4                                          | 37.13   | 5.64  | 21424  | 1  | 0.04731231 | 3273.37289  | 2860.76444 | 0.02587774 | 1424.39242  | 3914.10174  | 5460.51128  | 4767.29651 | 3480.68182 | 3923.42821  | 5461.0398   | 4835.56053 | 716.13641  | 5084.82611 | 6988.56859 | 2705.399    | 0.03396139  | 3696.07128 | 4639.52758 |
| Q8VBV3 | Exoc6   | Exosome complex component RR4                                           | 416.99  | 31.74 | 32632  | 6  | 1758.34349 | 8679.5962   | 67806.9797 | 92947.9137 | 91444.4671  | 61093.11    | 59884.9855  | 48214.6508 | 7128.28    | 80426.376   | 70344.2471  | 78337.3201 | 7162.814   | 76255.0217 | 74025.4442 | 76657.97275 | 76937.565   | 78613.8464 |            |
| Q92119 | Exoc7   | Exosome complex component RR41                                          | 152.92  | 10.61 | 26250  | 2  | 10055.3336 | 18778.9968  | 21061.5799 | 34985.9173 | 24222.0110  |             |             |            |            |             |             |            |            |            |            |             |             |            |            |

|         |          |                                                            |         |       |        |    |             |             |             |             |            |            |            |            |            |             |             |            |             |            |             |            |             |            |            |            |
|---------|----------|------------------------------------------------------------|---------|-------|--------|----|-------------|-------------|-------------|-------------|------------|------------|------------|------------|------------|-------------|-------------|------------|-------------|------------|-------------|------------|-------------|------------|------------|------------|
| P84817  | Fkx1     | Mitochondrial fission 1 protein                            | 96.02   | 15.79 | 16995  | 2  | 17295.1851  | 6076.28833  | 9919.88922  | 2744.61608  | 3389.61262 | 7827.60059 | 9984.81965 | 8659.25192 | 10649.9249 | 8769.48792  | 11318.4519  | 10523.4913 | 8816.65283  | 14744.4236 | 10851.1677  | 10262.5595 | 8629.58343  | 10743.0222 | 11435.3759 |            |
| Q6P906  | Fkbp15   | K506-binding protein 15                                    | 50.05   | 11.15 | 132961 | 1  | 0.03665204  | 3336.9158   | 3123.38551  | 0.02587718  | 3024.10671 | 0.03665204 | 3336.9158  | 3123.38551 | 0.02587718 | 3024.10671  | 0.03665204  | 3336.9158  | 3123.38551  | 0.02587718 | 3024.10671  | 0.03665204 | 3336.9158   | 3123.38551 | 0.02587718 | 3024.10671 |
| P26883  | Fkbp1a   | Peptidyl-prolyl cis-trans isomerase FKBP1A                 | 252.59  | 25    | 11923  | 3  | 302460.874  | 269748.552  | 266988.282  | 112821.473  | 1441.14917 | 2671.99104 | 258398.984 | 248180.404 | 240131.534 | 276225.466  | 291106.439  | 251469.366 | 286797.932  | 273098.433 | 222601.975  | 283008.707 | 280450.731  | 28172.804  | 214576.847 |            |
| P45878  | Fkbp2    | Peptidyl-prolyl cis-trans isomerase FKBP2                  | 268.95  | 25.71 | 11534  | 3  | 91057.1984  | 88127.3088  | 101105.371  | 36160.7645  | 31053.3782 | 106649.521 | 109041.732 | 98399.6113 | 11978.2733 | 89225.722   | 111779.049  | 82772.913  | 103564.521  | 121190.797 | 95519.8945  | 110596.848 | 81585.4679  | 114184.219 | 108322.086 |            |
| Q62446  | Fkbp3    | Peptidyl-prolyl cis-trans isomerase FKBP3                  | 120.44  | 15.62 | 25148  | 3  | 36908.5824  | 20423.1242  | 22239.5175  | 22338.0359  | 40322.7113 | 5555.5569  | 5791.1439  | 52989.4609 | 61858.101  | 803031.0914 | 7004.840    | 67084.69   | 61941.2959  | 45452.7381 | 19564.3675  | 11747.6307 | 16731.5682  | 88803.431  | 53767.5594 |            |
| P30416  | Fkbp4    | Peptidyl-prolyl cis-trans isomerase FKBP4                  | 1182.28 | 61.57 | 51572  | 21 | 81127.956   | 577656.627  | 52015.598   | 20325.358   | 278997.599 | 67956.64   | 739126.368 | 774249.487 | 655247.477 | 805000.001  | 676095.766  | 684925.016 | 793046.577  | 590852.901 | 660342.511  | 808749.328 | 747799.229  | 744105.619 | 668376.257 |            |
| Q64378  | Fkbp5    | Peptidyl-prolyl cis-trans isomerase FKBP5                  | 520.51  | 25.44 | 50966  | 10 | 209323.081  | 170892.78   | 197724.566  | 11591.672   | 118154.302 | 100486.765 | 249056.428 | 153119.833 | 224624.116 | 27618.759   | 246441.66   | 251010.61  | 363885.017  | 232982.932 | 2317051.366 | 264922.199 | 247601.336  | 244618.928 | 23304.144  |            |
| Q53465  | Fkbp8    | Peptidyl-prolyl cis-trans isomerase FKBP8                  | 333.75  | 15.17 | 43529  | 5  | 61500.4146  | 80005.2799  | 554131.048  | 84244.5052  | 74674.746  | 54597.046  | 57041.4421 | 77071.2564 | 60241.004  | 43542.405   | 58441.1736  | 61162.73   | 54430.4109  | 63528.643  | 61774.6588  | 69698.8631 | 55695.8146  | 57142.1175 | 59353.3851 |            |
| Q9J28   | Flii     | Protein flightless-1 homolog                               | 579.02  | 10.46 | 144803 | 11 | 91204.7004  | 82805.5712  | 84496.5622  | 11631.425   | 117895.41  | 153442.843 | 160665.687 | 147198.314 | 138229.926 | 10931.197   | 511847.1262 | 163414.654 | 132389.137  | 152588.664 | 63819.8399  | 127518.49  | 116192.725  | 138495.064 | 136071.137 |            |
| QB81TMs | Flia     | Filamin-1                                                  | 4874.93 | 41.48 | 281222 | 76 | 591047.911  | 835972.708  | 868562.593  | 649157.316  | 679201.736 | 237777.711 | 2529272.68 | 245474.974 | 2122992.58 | 1431826.79  | 1320513.29  | 1426824.04 | 150419.16   | 1468779.73 | 1148350.55  | 130471.12  | 1246747.45  | 1253881.62 | 126739.42  |            |
| QO0817  | Fln      | Filinin-1                                                  | 182.81  | 13.08 | 47513  | 4  | 91021.7998  | 2229.6496   | 179330.062  | 37845.6763  | 32466.6295 | 41097.1468 | 32340.7582 | 38370.0292 | 43999.5635 | 20671.2601  | 200663.0392 | 15881.2589 | 17044.8077  | 19291.0302 | 32503.2993  | 22437.0082 | 22016.149   | 20796.9027 | 17174.7921 |            |
| Q60634  | Fln2     | Filinin-2                                                  | 107.5   | 5.14  | 47038  | 2  | 28160.692   | 15927.1507  | 13673.8937  | 11725.0304  | 8888.1921  | 14182.640  | 15128.2347 | 11397.9215 | 17254.3066 | 9808.63644  | 12671.068   | 10934.7927 | 7671.78274  | 5777.09988 | 12803.6139  | 14959.7903 | 7104.28512  | 9466.82214 | 8026.2948  |            |
| Q9J216  | Fmn1     | Formin-like protein 1                                      | 559.86  | 11.97 | 122060 | 11 | 55555.5662  | 155861.201  | 183087.631  | 183100.251  | 185528.368 | 239396.778 | 177205.955 | 199720.152 | 227712.822 | 170520.607  | 203988.402  | 193335.102 | 163846.044  | 198931.902 | 208670.816  | 198574.516 | 203048.465  | 181048.559 | 208418.931 |            |
| Q9ZP74  | Fmn2     | Formin-like protein 3                                      | 295.62  | 6.32  | 117169 | 5  | 0.04731231  | 56278.3349  | 665757.1638 | 92462.9586  | 90211.9797 | 88323.4776 | 55339.1295 | 42260.1831 | 94929.2483 | 53225.569   | 77249.8751  | 72710.5796 | 57008.0745  | 81674.6829 | 89277.7727  | 75724.4664 | 69262.1962  | 61901.9075 | 71002.6029 |            |
| P15922  | Fmr1     | Synaptic functional regulator FMR1                         | 186.6   | 6.03  | 61899  | 3  | 106687.011  | 66914.5858  | 81021.4678  | 53767.7001  | 71688.2741 | 99218.1177 | 94497.2249 | 11920.896  | 94688.579  | 100631.586  | 108436.424  | 96924.2396 | 106295.261  | 83341.5252 | 72943.47    | 95962.8492 | 100447.292  | 100748.374 | 93245.817  |            |
| Q80T10  | Fmr2     | Formin-binding protein 4                                   | 434.16  | 17.05 | 31434  | 8  | 492.4484    | 4831.7781   | 35584.4733  | 20652.5712  | 34281.2603 | 51154.5123 | 104796.633 | 79578.7436 | 55834.5728 | 100875.645  | 74555.514   | 60964.3586 | 5874.5701   | 74943.0716 | 48995.1264  | 85662.6134 | 60509.3616  | 74792.9346 | 73013.4913 |            |
| P97376  | Frg1     | Formin FRG1                                                | 73.39   | 5.04  | 29127  | 1  | 0.04731231  | 14908.9084  | 17191.4574  | 14205.4975  | 12922.6706 | 20426.5991 | 18244.1902 | 17701.3687 | 18455.776  | 18842.3344  | 24222.2968  | 20104.6685 | 18206.3963  | 18946.5585 | 22144.804   | 23792.3808 | 15372.8515  | 21590.994  | 18765.1486 |            |
| P09528  | Fhl1     | Feritin heavy chain                                        | 51.69   | 3.85  | 21067  | 1  | 1.28033.665 | 10231.2067  | 97636.6422  | 47032.2927  | 59824.3827 | 106694.106 | 12382.765  | 106499.721 | 100683.91  | 142609.118  | 147899.144  | 107678.853 | 136573.434  | 134154.125 | 133651.383  | 137884.932 | 115078.223  | 142569.611 | 125589.915 |            |
| P29391  | Fhl1     | Feritin light chain 1                                      | 538.2   | 49.18 | 20802  | 9  | 150298.781  | 235584.587  | 249672.738  | 158185.273  | 154331.662 | 301820.405 | 347687.89  | 314729.987 | 238627.402 | 356032.52   | 427842.928  | 360153.909 | 343201.157  | 315492.528 | 257065.439  | 375391.166 | 309395.241  | 329935.272 | 326064.885 |            |
| QB8G1W  | Fto      | Formaldehyde-tetrahydrofolate-dependent dioxygenase FTO    | 40.29   | 2.79  | 58067  | 1  | 6884.92141  | 3471.74575  | 3456.19312  | 0.02587718  | 0.02587718 | 6388.94706 | 4361.50718 | 3996.93734 | 5331.81953 | 5136.2239   | 5235.30948  | 7364.02523 | 3476.84773  | 7063.04531 | 5038.54477  | 4065.5869  | 5609.06437  | 6860.93021 | 4055.47332 |            |
| Q9R1T2  | Ftsj3    | pre-mRNA processing protein FTSJ3                          | 109.71  | 4.1   | 94767  | 2  | 0.04731231  | 10681.5066  | 2339.24491  | 35564.6189  | 29214.3169 | 9357.37852 | 7033.17088 | 10097.573  | 10943.6583 | 8661.72728  | 12416.2967  | 9947.28967 | 15422.9763  | 9168.81228 | 1154.0081   | 10904.6111 | 11108.9941  | 13772.2166 |            |            |
| Q32P3X  | Fuhp1    | Fur upstream element-binding protein 1                     | 712.51  | 27.39 | 67197  | 14 | 315314.377  | 61955.7514  | 25476.7575  | 185537.7    | 268253.256 | 308018.151 | 30678.587  | 305958.58  | 255497.609 | 385693.966  | 335612.729  | 309394.987 | 356651.287  | 341971.93  | 272978.982  | 374432.033 | 323823.329  | 326504.633 | 294364.291 |            |
| Q8R2K1  | Fuon     | Fucose mutarotase                                          | 76.27   | 7.84  | 16805  | 1  | 1.6030.9116 | 21955.81515 | 10527.7472  | 6586.9044   | 2912.59268 | 9960.91006 | 12788.9409 | 8490.77685 | 10.9107    | 9289.20627  | 13255.4654  | 13157.7582 | 13188.989   | 14549.6466 | 11055.381   | 11790.9293 | 9446.02895  | 12246.2367 | 11704.0348 |            |
| P65859  | Fus      | RNA-binding protein FUS                                    | 51.49   | 23.36 | 52673  | 8  | 408454.879  | 312200.164  | 345667.438  | 374047.57   | 309488.273 | 305761.871 | 32107.342  | 280735.296 | 309564.821 | 411531.649  | 340183.039  | 38016.794  | 356343.488  | 386584.694 | 322447.961  | 353128.399 | 393270.802  | 322919.156 | 319309.597 |            |
| Q61584  | Fxr1     | FXR nuclear receptor transcriptional activator             | 818.29  | 27.33 | 76214  | 14 | 23231.254   | 212957.12   | 24974.688   | 17448.016   | 24214.219  | 5953       | 283052.871 | 30105.544  | 337153.314 | 26671.965   | 306153.858  | 30340.530  | 309950.801  | 292946.683 | 268300.352  | 275812.694 | 312770.154  | 262053.762 | 302445.64  | 308360.956 |
| P97808  | Fxyd1    | FXN domain-containing ion transport regulator 5            | 97.78   | 14.04 | 19454  | 2  | 9225.25298  | 5807.8252   | 82476.9669  | 79765.858   | 84624.7636 | 77325.9665 | 10833.3864 | 6996.91679 | 13769.7171 | 10265.6659  | 42844.904   | 44712.7966 | 32515.4123  | 39890.3079 | 42022.6234  | 48725.6126 | 48744.067   | 44225.8609 | 51642.3801 |            |
| O35601  | Fyb1     | FN-binding protein 1                                       | 14.22   | 6.00  | 90055  | 4  | 14700.0013  | 37707.1003  | 31121.917   | 18632.2296  | 28734.1669 | 25423.403  | 31106.222  | 33881.2247 | 32766.594  | 33978.6029  | 44949.2469  | 34352.438  | 44444.5603  | 3268.8459  | 29195.7242  | 32395.1657 | 30670.0668  | 31635.8617 | 31001.0361 |            |
| Q7T104  | Fynd1    | UAP56-interacting factor                                   | 39.66   | 4.1   | 35642  | 1  | 0.04731231  | 10331.1494  | 0.0311974   | 27844.37062 | 9735.32793 | 4165.2577  | 1341.1796  | 0.03873263 | 0.0327065  | 1179.58453  | 0.03500571  | 0.03548508 | 0.03267074  | 0.03203276 | 7572.52372  | 6403.48958 | 4751.91833  | 0.03434898 | 5467.13816 |            |
| P97855  | G3bp1    | Ras GTPase-activating protein-binding protein 1            | 810.68  | 40.22 | 51829  | 15 | 363870.545  | 408388.778  | 405106.119  | 179343.706  | 190991.965 | 405679.596 | 41523.706  | 354992.13  | 382340.074 | 59744.655   | 432960.062  | 516120.167 | 304466.948  | 471990.335 | 495952.422  | 554772.178 | 570058.98   | 530403.492 | 517952.583 |            |
| P97379  | G3bp2    | Ras GTPase-activating protein-binding protein 2            | 349.52  | 11.83 | 54088  | 5  | 44765.7424  | 167196.884  | 16662.058   | 89604.001   | 83690.1526 | 178811.147 | 16519.496  | 153256.978 | 164059.598 | 267332.497  | 533680.055  | 246424.249 | 187172.557  | 153181.424 | 189802.203  | 195635.379 | 242460.52   | 221494.039 | 180003.267 |            |
| Q6NSQ9  | G6pc3    | Ras GTPase- $\alpha$ -phosphatase 3                        | 118.59  | 9.54  | 38782  | 2  | 0.04731231  | 2910.1362   | 36673.00541 | 7107.5106   | 8261.59637 | 3943.86998 | 895.083729 | 3191.43315 | 5316.67103 | 2694.68851  | 1350.73771  | 5755.19399 | 8681.33669  | 3534.57255 | 2689.99012  | 4435.58559 | 2977.1845   | 1845.78896 | 4102.96664 |            |
| Q00612  | G6pdx    | Glucose-6-phosphate 1-dehydrogenase X                      | 1594.54 | 58.83 | 59263  | 31 | 13162.6011  | 111939.228  | 99589.848   | 563940.626  | 487916.363 | 1609656.69 | 1786756.98 | 138661.56  | 161203.04  | 1609008.84  | 143016.615  | 1368601.31 | 1460260.261 | 172204.407 | 1179424.242 | 1355458.96 | 1344899.636 | 1344353.54 | 125437.37  |            |
| P70699  | Gaa      | Lysosomal alpha-L-glucosidase                              | 769.46  | 20.25 | 106248 | 12 | 56745.0188  | 83957.5632  | 9767.5987   | 75449.6533  | 55683.3114 | 107426.763 | 90797.5997 | 75449.6533 | 103775.449 | 53970.6104  | 893614.694  | 97938.8731 | 80437.2638  | 99739.1613 | 85731.4386  | 105687.841 | 89590.2434  | 91136.2896 | 88864.4041 |            |
| P60517  | Gabarap  | Gamma-aminobutyric acid receptor-associated protein 1      | 186.33  | 21.37 | 13918  | 3  | 17671.9362  | 45966.4884  | 53467.1876  | 13389.6642  | 44196.7197 | 46190.8866 | 75337.3571 | 72824.2939 | 64118.0265 | 67079.8209  | 45951.7869  | 61250.4552 | 67851.1051  | 57101.2481 | 47641.6416  | 83179.2633 | 69600.7233  | 61691.0565 | 55886.9479 |            |
| P60521  | Gabarap2 | Gamma-aminobutyric acid receptor-associated protein-like 2 | 179.61  | 36.75 | 13667  | 4  | 0.04731231  | 53673.629   | 49069.9831  | 9708.68562  | 41203.6255 | 52012.4181 | 81496.0256 | 68345.0222 | 54479.3189 | 80943.8427  | 52221.67008 | 518        |             |            |             |            |             |            |            |            |

|        |        |                                                                      |          |       |        |    |            |             |            |            |             |             |            |            |            |            |            |            |            |            |            |            |            |            |             |           |
|--------|--------|----------------------------------------------------------------------|----------|-------|--------|----|------------|-------------|------------|------------|-------------|-------------|------------|------------|------------|------------|------------|------------|------------|------------|------------|------------|------------|------------|-------------|-----------|
| Q9CQM9 | Glxr3  | Glutaredoxin-3                                                       | 479.38   | 30.56 | 37778  | 8  | 40481.2801 | 52039.0598  | 60986.34   | 44895.4682 | 33385.0145  | 64263.8803  | 92590.9803 | 78046.6749 | 88064.1785 | 95314.4922 | 29783.3518 | 87181.3184 | 93500.1862 | 114857.808 | 58803.6865 | 75472.1854 | 46922.6966 | 78264.4576 | 607379.9633 |           |
| LQ80Y2 | Glxr5  | Glutaredoxin-related protein 5, mitochondrial                        | 90.76    | 17.76 | 6290   | 14 | 40471.3121 | 12967.6023  | 11360.5934 | 4190.8434  | 5044.79418  | 10728.8688  | 1314.7773  | 11943.6024 | 12743.8098 | 18173.927  | 14921.9714 | 14637.9901 | 15008.3072 | 20897.6624 | 17801.8826 | 15980.7227 | 13012.8237 | 13504.8857 | 14739.9647  |           |
| D3ZP73 | Gls    | Glutamine-kinase isoform, mitochondrial                              | 902.96   | 26.11 | 73964  | 14 | 144422.914 | 11871.9797  | 129380.82  | 11840.7164 | 60946.586   | 119240.948  | 150934.424 | 156911.9   | 154566.604 | 111073.793 | 105048.825 | 121715.014 | 124533.964 | 117987.409 | 148898.53  | 139395.399 | 101545.425 | 119423.375 | 158979.314  |           |
| B0BNM9 | GLTP   | Glycolipid transfer protein                                          | 40.52    | 7.18  | 23704  | 6  | 40471.3121 | 9758.9783   | 13993.1168 | 11350.9375 | 6666.39545  | 11892.9467  | 10733.2447 | 6339.66845 | 8504.6091  | 11288.1110 | 11108.2110 | 11108.2110 | 10802.024  | 10294.3729 | 12538.7618 | 9734.12137 | 6157.4359  | 8595.7536  | 6666.39545  |           |
| P10H60 | Glu1   | Glutamate dehydrogenase 1, mitochondrial                             | 14335.04 | 47.13 | 61416  | 24 | 10845.9133 | 8481.78416  | 828042.603 | 599417     | 41067.95    | 800213.085  | 840177.09  | 901679.965 | 897333.63  | 632252.74  | 266839.057 | 614927.507 | 728312.125 | 639816.804 | 834543.397 | 806810.87  | 647718.96  | 747054.548 | 803491.557  |           |
| Q5RKH0 | Gly1   | Putative oxidoreductase G-LYR1                                       | 32.86    | 12.62 | 60421  | 6  | 40471.3121 | 43052.605   | 39574.3602 | 5423.5081  | 57544.5868  | 19155.0149  | 22487.3509 | 33613.0236 | 40294.8771 | 44742.4416 | 26668.8352 | 39540.1189 | 35557.2395 | 27079.3983 | 36688.5722 | 37258.5757 | 13146.8004 | 35026.0355 | 43455.5062  |           |
| Q5RKH2 | Gly2   | Putative oxidoreductase G-LYR2                                       | 127.7    | 6.72  | 61852  | 2  | 40471.3121 | 7082.255917 | 10233.323  | 10235.8771 | 1264.8893   | 5131.935    | 9365.31017 | 1754.1809  | 11643.8488 | 9075.07519 | 10413.6814 | 4473.13599 | 9173.9128  | 13447.1093 | 7102.4307  | 10233.323  | 10235.8771 | 1264.8893  | 5131.935    |           |
| Q63228 | Gmbh   | Glia maturation factor beta                                          | 271.63   | 35.21 | 16736  | 4  | 11657.508  | 114908.227  | 127942.323 | 68342.4141 | 77315.4374  | 129213.843  | 98236.8174 | 107651.896 | 94182.389  | 159975.552 | 149508.770 | 144433.588 | 161526.105 | 123758.476 | 147627.434 | 153701.898 | 161827.678 | 147083.975 | 114067.55   |           |
| Q9ERL7 | Gmgf   | Glia maturation factor gamma                                         | 142.72   | 28.17 | 16736  | 3  | 141750.078 | 145320.699  | 150655.75  | 97986.774  | 14215.946   | 94961.8128  | 111561.826 | 12331.9387 | 183963.466 | 140371.959 | 156822.784 | 175596.959 | 143273.333 | 170043     | 17984.728  | 178054.005 | 171890.175 | 137070.531 | 137070.531  |           |
| Q6PGG2 | Gmp    | GEM-interacting protein                                              | 94.61    | 1.03  | 107545 | 2  | 40471.3121 | 3471.84189  | 2911.59903 | 2515.49647 | 2021.48192  | 6628.22271  | 5923.57172 | 6798.722   | 10521.7381 | 5668.46635 | 6214.47343 | 7360.51364 | 5150.79319 | 7787.65606 | 3672.50033 | 1974.23517 | 4892.26954 | 4379.16434 | 8311.13616  |           |
| Q5X1C1 | Gmpa   | Mannose-1-phosphate guanylyltransferase alpha                        | 137.98   | 10    | 46191  | 3  | 28461.3707 | 20312.4346  | 18583.785  | 7702.7667  | 16077.0423  | 28660.7727  | 24032.2772 | 26335.5781 | 21822.832  | 29550.163  | 29186.8963 | 28066.857  | 26003.1618 | 29522.3338 | 25688.9678 | 20914.9085 | 21331.8583 | 21400.3231 | 21400.3231  |           |
| Q9B1Z7 | Gmpbb  | Mannose-1-phosphate guanylyltransferase beta                         | 110.21   | 5     | 39917  | 1  | 40471.3121 | 6744.83129  | 9157.57778 | 14650.5797 | 0202510227  | 10735.508   | 10589.7211 | 7610.13556 | 11399.0474 | 10159.805  | 14875.1552 | 13399.8694 | 8601.50746 | 9078.31281 | 10600.2382 | 8761.82269 | 8348.97525 | 7629.52837 | 8706.7241   |           |
| Q9DZC1 | Gmpr   | GMP reductase-1                                                      | 63.55    | 6.38  | 37482  | 1  | 15880.7643 | 5598.87364  | 5832.27643 | 6642.19312 | 6327.7195   | 8377.298    | 6124.29377 | 7410.9844  | 11944.1159 | 8037.92186 | 9398.14283 | 10520.3045 | 7436.18558 | 12584.9335 | 8373.0214  | 7707.59511 | 9516.50936 | 7085.65207 | 9070.74429  |           |
| Q31HK7 | Gmps   | GMP synthase [glutamine-hydrolyzing]                                 | 10871.14 | 43.43 | 76723  | 20 | 101446.758 | 21569.2402  | 176937.906 | 10118.427  | 114998.311  | 247913.668  | 263552.555 | 239345.306 | 266698.533 | 329516.379 | 274895.786 | 309290.784 | 320533.451 | 302030.322 | 260285.369 | 297437.906 | 281464.563 | 277230.45  | 280618.139  |           |
| P27601 | Gna13  | Guanine nucleotide-binding protein subunit alpha-13                  | 45.3     | 2.65  | 40555  | 1  | 40471.3121 | 52929.2401  | 1071.07894 | 020512027  | 6194.4067   | 9161.5567   | 6232.32453 | 6993.6929  | 4481.4522  | 5851.30725 | 3185.37684 | 4326.22454 | 2698.77315 | 4883.85467 | 5817.37284 | 3291.26366 | 4204.15816 | 5601.84254 | 5601.84254  |           |
| P08752 | Gna2   | Guanine nucleotide-binding protein G(i) subunit alpha-2              | 1241.68  | 57.18 | 40489  | 17 | 595671.885 | 311368.212  | 352271.354 | 43501.525  | 389586.454  | 450653.247  | 467600.691 | 451008.654 | 485011.871 | 310938.26  | 378759.573 | 343511.198 | 304185.842 | 300889.405 | 410428.236 | 430142.388 | 319711.284 | 324504.286 | 438177.956  |           |
| Q9DC51 | Gna3   | Guanine nucleotide-binding protein G(i) subunit alpha                | 323.62   | 18.36 | 40538  | 5  | 130658.54  | 73252.2254  | 27988.3339 | 125010.273 | 102338.824  | 90697.8723  | 106262.793 | 106883.158 | 105830.111 | 70291.497  | 84101.2269 | 67934.5227 | 69248.2696 | 62233.5584 | 111903.393 | 104639.963 | 76691.2668 | 72158.2476 | 97464.9388  |           |
| P21279 | Gnaq   | Guanine nucleotide-binding protein G(q) subunit alpha                | 174.62   | 8.91  | 42158  | 3  | 9633.8445  | 21939.3229  | 28933.2774 | 59085.2274 | 34078.1454  | 39168.7672  | 19683.6069 | 28697.019  | 37932.2458 | 17635.639  | 23108.6276 | 25620.1601 | 19643.2814 | 21730.5734 | 26090.2583 | 22215.7856 | 26194.465  | 21056.492  | 25917.9552  |           |
| P20394 | Gnas   | Guanine nucleotide-binding protein G(s) subunit alpha isoforms short | 140.01   | 8.38  | 45604  | 2  | 40471.3121 | 030311494   | 030307204  | 7396.62943 | 4971.61404  | 4059.03991  | 3836.36933 | 603837823  | 6948.61876 | 4134.62642 | 4116.63281 | 3750.57576 | 6411.68213 | 2141.04636 | 3085.39548 | 5171.0357  | 5171.0357  | 5171.0357  | 5171.0357   |           |
| P54311 | Gnb1   | Guanine nucleotide-binding protein G(i)(S)(G)(T) subunit beta-1      | 561.43   | 31.76 | 37377  | 9  | 346571.601 | 237630.259  | 222452.891 | 339617.054 | 226432.617  | 256893.912  | 282260.164 | 311591.703 | 262931.138 | 172191.107 | 217074.305 | 193038.495 | 205290.753 | 195865.814 | 219857.152 | 301947.226 | 209279.548 | 207432.339 | 218084.451  |           |
| P54313 | Gnb2   | Guanine nucleotide-binding protein G(i)(S)(G)(T) subunit beta-2      | 1122.22  | 60.29 | 37331  | 16 | 570351.375 | 422817.587  | 445320.505 | 601929.778 | 511299.278  | 529175.426  | 491088.456 | 547382.481 | 518643.64  | 324899.388 | 415052.403 | 367070.078 | 355651.454 | 365831.064 | 436569.872 | 500067.648 | 398490.327 | 390518.737 | 443263.773  |           |
| Q9DAS9 | Gng12  | Guanine nucleotide-binding protein G(i)(S)(G)(O) subunit gamma-12    | 57.15    | 15.28 | 7997   | 1  | 8671.67099 | 5270.94687  | 7242.28315 | 10660.9817 | 9134.98689  | 8015.31504  | 6301.44557 | 8360.38929 | 6239.12724 | 6221.05687 | 4933.56703 | 7406.42635 | 6726.40345 | 6135.15168 | 2790.30931 | 5845.48124 | 8727.00795 | 7148.17409 | 6401.94166  |           |
| P63213 | Gng2   | Guanine nucleotide-binding protein G(i)(S)(G)(O) subunit gamma-2     | 57.2     | 16.9  | 7850   | 1  | 40471.3121 | 8725.31196  | 17629.0111 | 54817.4008 | 24868.64819 | 19439.62891 | 12441.7737 | 17891.576  | 13981.221  | 9618.75747 | 12717.769  | 12379.0425 | 8013.75633 | 11553.7007 | 8391.11246 | 11519.0639 | 14172.9957 | 11159.3243 | 11783.108   |           |
| P36916 | Gnl1   | Guanine nucleotide-binding protein-like 1                            | 138.93   | 5.27  | 68771  | 3  | 40471.3121 | 9167.57309  | 8454.27197 | 4966.45267 | 5772.49719  | 9968.86078  | 5379.41392 | 3871.4457  | 2942.0362  | 1611.3986  | 13933.9743 | 12261.4833 | 4299.80559 | 17756.2517 | 5976.2767  | 13986.7206 | 7897.20287 | 4308.53545 | 11739.037   |           |
| Q991H1 | Gnl2   | Nucleolar GTP-binding protein 2                                      | 193.41   | 6.73  | 83345  | 4  | 4943.39457 | 30949.8718  | 28112.9658 | 45995.808  | 41930.0569  | 29829.4052  | 29449.984  | 35769.4703 | 29822.8254 | 38643.297  | 33543.763  | 34238.7151 | 30003.6983 | 39080.0635 | 31321.837  | 38529.6213 | 41140.0316 | 42191.6541 | 80017.8292  |           |
| Q8C111 | Gnl3   | Guanine nucleotide-binding protein-like 3                            | 420.96   | 25.65 | 60786  | 7  | 40471.3121 | 43113.7108  | 49614.691  | 59353.3804 | 99922.9749  | 40147.4109  | 36836.7164 | 45576.8573 | 59044.7174 | 48619.1372 | 43804.395  | 52348.7603 | 37640.0783 | 76831.2991 | 50138.2095 | 61644.6729 | 48122.4335 | 37362.8955 | 60773.291   |           |
| Q89858 | Gnpd1  | Glucosamine-6-phosphate isomerase 1                                  | 43.28    | 9.69  | 32549  | 1  | 40471.3121 | 030311494   | 030307204  | 020587718  | 020510227   | 1367.69996  | 3113.5922  | 4327.808   | 5858.5804  | 6409.7217  | 5132       | 7467.076   | 030545808  | 507.23627  | 030502376  | 1844.40474 | 2202.63071 | 2773.35453 | 910.44044   | 7288.0506 |
| Q9JK38 | Gnpat1 | Glucosamine-6-phosphate N-acetyltransferase                          | 68.79    | 5.98  | 20791  | 1  | 40471.3121 | 2434.90806  | 030702024  | 025877818  | 1050.06348  | 982.186932  | 3476.97197 | 1995.8194  | 2240.9888  | 3823.24202 | 4912.38577 | 1518.6211  | 3012.04791 | 2935.12139 | 2116.97109 | 4589.36106 | 030396139  | 1952.48359 | 030500218   |           |
| Q8R8F4 | Gns    | N-acetylglucosamine-6-sulfatase                                      | 365.02   | 17.83 | 61175  | 7  | 68237.8718 | 46935.6995  | 36402.1951 | 14543.784  | 16774.8257  | 54326.5444  | 49974.2176 | 43491.7871 | 44134.1689 | 34648.2884 | 32663.5862 | 30945.4042 | 37074.3232 | 28334.7311 | 33501.3481 | 29722.3193 | 35034.2303 | 31780.9975 | 32304.8251  |           |
| Q3ZU82 | Golga5 | Golgin subfamily A member 5                                          | 80.75    | 3.16  | 82334  | 2  | 40471.3121 | 5024.68235  | 6087.47443 | 020587718  | 020510227   | 7206.11612  | 030877705  | 030837823  | 9477.69622 | 030794034  | 6228.06159 | 4911.22754 | 030502746  | 030502376  | 5385.26189 | 7466.50312 | 2564.2923  | 030344898  | 6307.8004   |           |
| Q8BXA1 | Golm4  | Golgi integral membrane protein 4                                    | 34.73    | 1.53  | 76785  | 1  | 12237.3783 | 030311494   | 030307204  | 020587718  | 020510227   | 6195.68121  | 7046.83378 | 8257.95731 | 6462.37656 | 5399.53168 | 5035.37695 | 030545808  | 5055.04546 | 6372.34784 | 5043.4537  | 030380805  | 030396139  | 030344898  | 6458.54123  |           |
| Q9CRA5 | Golph3 | Golgi phosphoprotein 3                                               | 13.14    | 1.04  | 33752  | 2  | 40471.3121 | 2235.60953  | 2474.7439  | 3208.10759 | 1686.92526  | 2713.36451  | 3601.09883 | 2778.53347 | 3173.01943 | 2933.9234  | 4039.5454  | 3362.35662 | 3046.30994 | 5227.63088 | 2978.96439 | 3894.18688 | 2451.09848 | 2183.99986 | 2862.03456  |           |
| Q9C860 | Golphb | Vesicle transport protein GOT1B                                      | 151.02   | 10.87 | 15422  | 2  | 35         |             |            |            |             |             |            |            |            |            |            |            |            |            |            |            |            |            |             |           |

|        |        |                                                           |           |           |             |            |             |             |             |            |             |             |             |            |            |             |            |             |            |            |            |            |            |            |             |
|--------|--------|-----------------------------------------------------------|-----------|-----------|-------------|------------|-------------|-------------|-------------|------------|-------------|-------------|-------------|------------|------------|-------------|------------|-------------|------------|------------|------------|------------|------------|------------|-------------|
| A9UMV8 | H2afj  | Histone H2A J                                             | 646.79    | 58.91     | 14045       | 8          | 5777519.91  | 25340486.6  | 23829087.4  | 40958735   | 40960195.9  | 5397077.47  | 4169990.61  | 8841259.27 | 10242364.1 | 4811521.25  | 1442627.2  | 14080381.5  | 11779961.7 | 15707691   | 16654442.1 | 2277692.57 | 17796334.6 | 16499831.2 | 16494253.2  |
| P27661 | H2afx  | Histone H2A X                                             | 530.51    | 52.45     | 15246       | 7          | 9732735.31  | 22154290.4  | 21476228.4  | 35995822   | 36488113.6  | 3420342.58  | 3179985.77  | 7541537.73 | 8917465.79 | 45110828.08 | 1277618.14 | 12598747.8  | 10459333.6 | 13954637.8 | 14371773.1 | 5629696.56 | 16173062.9 | 14410392.9 | 14483522.3  |
| Q9Z0Q8 | H2afy  | Core histone macro-H2A J                                  | 453.21    | 32.53     | 39735       | 7          | 12879.75    | 219331.938  | 973335.747  | 15936.419  | 156117.042  | 87446.9149  | 72991.8399  | 8205909.94 | 87252.256  | 7362.0044   | 82657.1015 | 37645.2303  | 50115.3187 | 45201.1143 | 97545.9699 | 123251.153 | 82075.4203 | 96744.2618 | 102816.659  |
| PC0C86 | H2afz  | Histone H2A Z                                             | 53242.618 | 21997.793 | 712189908.6 | 32391610.7 | 34781210.6  | 3087844.6   | 2863204.55  | 6856707.94 | 8035903.95  | 4764484.05  | 10326933.5  | 11898428.6 | 6601759.9  | 13345418.2  | 14134494.8 | 443842.925  | 14562004.2 | 1428785.61 | 1428785.61 | 1428785.61 | 1428785.61 | 1428785.61 | 1428785.61  |
| P02301 | H3f3c  | Histone H3.3 C                                            | 574.81    | 54.41     | 15315       | 9          | 14038063.5  | 8296765.08  | 10198275.5  | 27443259.2 | 18108141.5  | 7440085.32  | 3668870.74  | 5902070.19 | 6150249.29 | 4680571.68  | 5647486.32 | 5496964.96  | 4601920.99 | 5729227.4  | 5220555.44 | 6692958.12 | 7064231.9  | 5900215.46 | 6330130.26  |
| Q8K2C9 | H3ac3  | Very-long-chain (3R)-3-hydroxy-lysine-CoA dehydrogenase 3 | 39.76     | 2.21      | 43131       | 1          | 0.04731231  | 15978.1958  | 212328.57   | 36376.851  | 21250.578   | 0.03665024  | 0.03877705  | 0.03838723 | 0.03877705 | 0.03799434  | 0.564726   | 0.03548508  | 0.0362760  | 0.5661381  | 13261.8171 | 0.03308805 | 1088.79123 | 0.03348998 | 1923.41099  |
| Q8C1H7 | H3ac1  | 2-Hydroxyacyl-CoA lyase 1                                 | 35.49     | 1.38      | 63616       | 1          | 0.04731231  | 0.0311494   | 0.03070204  | 0.02587718 | 0.02510227  | 4508.56088  | 3239.80938  | 3494.36862 | 341.38034  | 3891.87791  | 6745.3803  | 2420.98701  | 2296.27182 | 0.03502376 | 3446.09141 | 0.03308805 | 0.03396139 | 2687.11582 | 0.03500218  |
| Q61425 | H3ad   | Hydroxyacyl-coenzyme A dehydrogenase, mitochondrial       | 204.51    | 12.1      | 34464       | 4          | 1.57064.395 | 148669.709  | 115356.529  | 81991.7808 | 500064.66   | 125639.846  | 125639.846  | 125639.846 | 125639.846 | 125639.846  | 125639.846 | 125639.846  | 125639.846 | 125639.846 | 125639.846 | 125639.846 | 125639.846 | 125639.846 | 125639.846  |
| Q8BMS1 | H3adh  | Trifunctional enzyme subunit alpha, mitochondrial         | 1267.31   | 39.19     | 82670       | 19         | 176139.668  | 202245.551  | 223100.627  | 324835.822 | 233901.421  | 252088.79   | 218404.828  | 241161.754 | 301944.632 | 162847.692  | 210651.879 | 237389.3    | 179074.848 | 211968.462 | 276251.499 | 229960.611 | 177662.99  | 180168.538 | 217408.768  |
| Q9PKB8 | H3ahg  | Trifunctional enzyme subunit beta, mitochondrial          | 437.77    | 25.26     | 51386       | 9          | 52471.6932  | 121819.612  | 125700.383  | 160770.366 | 92129.9249  | 133029.225  | 149233.993  | 1401.374   | 130070.437 | 105245.696  | 104703.442 | 95123.8836  | 1101.28011 | 103784.931 | 139816.86  | 139861.807 | 121890.105 | 103390.498 | 12970.786   |
| Q61035 | H3ars  | Histidine-tyrosine ligase, cytoplasmic                    | 569.23    | 20.46     | 34084       | 12         | 81555.67389 | 14502.763   | 18599.1207  | 5762.88881 | 4459.23246  | 28845.5822  | 30928.3495  | 2511.3619  | 262902.596 | 1919.3282   | 21898.5614 | 17122.8159  | 19387.9781 | 24723.3146 | 17722.498  | 22932.2265 | 20403.3269 | 7631.37566 | 13982.9143  |
| Q8B71  | H3at1  | Histone acetyltransferase type B catalytic subunit        | 346.34    | 15.62     | 49278       | 5          | 7925.60073  | 39271.489   | 28585.4338  | 6169.71714 | 8197.4744   | 47782.0308  | 55787.6249  | 51165.2077 | 52084.1078 | 12948.4783  | 53518.8133 | 349615.9286 | 61251.6322 | 82703.0344 | 44675.3112 | 46630.1347 | 54889.1201 | 50521.6867 | 54889.5627  |
| Q8BF72 | H3aus4 | HAUS augmin-like complex subunit 4                        | 40.47     | 7.16      | 42197       | 1          | 0.04731231  | 1426.20715  | 0.03070204  | 0.02587718 | 0.02510227  | 32320.70165 | 1617.7356   | 1617.7356  | 2126.1054  | 1920.97496  | 2865.22762 | 2726.53836  | 2082.8777  | 0.03396139 | 2238.80521 | 2711.8815  |            |            |             |
| Q69Z57 | H3bs1  | HBS1-like protein                                         | 101.36    | 2.79      | 75100       | 2          | 0.04731231  | 9292.67943  | 9154.95383  | 0.02587718 | 0.02510227  | 6217.1514   | 12282.6441  | 9343.78339 | 3538.90445 | 10887.7964  | 12300.366  | 12727.3878  | 6781.63834 | 13915.2122 | 12399.9877 | 11235.6327 | 12472.0971 | 10562.4692 | 15465.59393 |
| P53025 | Hccc   | Cytochrome c-type heme lyase                              | 49.37     | 4.78      | 30978       | 1          | 0.04731231  | 2918.71151  | 10080.11395 | 15219.155  | 11078.0068  | 0.03665024  | 9525.17783  | 10561.7089 | 11088.9307 | 5436.17583  | 7651.62657 | 8529.30108  | 7438.39152 | 5954.82202 | 6203.38415 | 8064.95011 | 9685.88699 | 9229.78715 | 12355.1891  |
| Q61191 | Hctf1  | Host cell factor 1                                        | 581.15    | 8.9       | 210437      | 12         | 72765.0155  | 135164.578  | 167037.466  | 239022.687 | 189276.576  | 133459.416  | 138389.465  | 119368.912 | 128007.904 | 179082.729  | 182800.498 | 160939.67   | 160895.154 | 183975.631 | 181620.345 | 161458.938 | 127240.168 | 161254.219 | 141075.46   |
| Q91035 | Hars   | Histidine-tyrosine ligase, cytoplasmic                    | 569.23    | 20.46     | 34084       | 12         | 81555.67389 | 14502.763   | 18599.1207  | 5762.88881 | 4459.23246  | 28845.5822  | 30928.3495  | 2511.3619  | 262902.596 | 1919.3282   | 21898.5614 | 17122.8159  | 19387.9781 | 24723.3146 | 17722.498  | 22932.2265 | 20403.3269 | 7631.37566 | 13982.9143  |
| Q8B71  | Hat1   | Histone acetyltransferase type B catalytic subunit        | 346.34    | 15.62     | 49278       | 5          | 7925.60073  | 39271.489   | 28585.4338  | 6169.71714 | 8197.4744   | 47782.0308  | 55787.6249  | 51165.2077 | 52084.1078 | 12948.4783  | 53518.8133 | 349615.9286 | 61251.6322 | 82703.0344 | 44675.3112 | 46630.1347 | 54889.1201 | 50521.6867 | 54889.5627  |
| Q8BF72 | H3aus4 | HAUS augmin-like complex subunit 4                        | 40.47     | 7.16      | 42197       | 1          | 0.04731231  | 1426.20715  | 0.03070204  | 0.02587718 | 0.02510227  | 32320.70165 | 1617.7356   | 1617.7356  | 2126.1054  | 1920.97496  | 2865.22762 | 2726.53836  | 2082.8777  | 0.03396139 | 2238.80521 | 2711.8815  |            |            |             |
| Q69Z57 | H3bs1  | HBS1-like protein                                         | 101.36    | 2.79      | 75100       | 2          | 0.04731231  | 9292.67943  | 9154.95383  | 0.02587718 | 0.02510227  | 6217.1514   | 12282.6441  | 9343.78339 | 3538.90445 | 10887.7964  | 12300.366  | 12727.3878  | 6781.63834 | 13915.2122 | 12399.9877 | 11235.6327 | 12472.0971 | 10562.4692 | 15465.59393 |
| P53025 | Hccc   | Cytochrome c-type heme lyase                              | 49.37     | 4.78      | 30978       | 1          | 0.04731231  | 2918.71151  | 10080.11395 | 15219.155  | 11078.0068  | 0.03665024  | 9525.17783  | 10561.7089 | 11088.9307 | 5436.17583  | 7651.62657 | 8529.30108  | 7438.39152 | 5954.82202 | 6203.38415 | 8064.95011 | 9685.88699 | 9229.78715 | 12355.1891  |
| Q61191 | Hctf1  | Host cell factor 1                                        | 581.15    | 8.9       | 210437      | 12         | 72765.0155  | 135164.578  | 167037.466  | 239022.687 | 189276.576  | 133459.416  | 138389.465  | 119368.912 | 128007.904 | 179082.729  | 182800.498 | 160939.67   | 160895.154 | 183975.631 | 181620.345 | 161458.938 | 127240.168 | 161254.219 | 141075.46   |
| P49710 | Hct1   | Hematopoietic lineage cell-specific protein               | 647.11    | 24.69     | 54240       | 11         | 116482.446  | 246087.724  | 287146.11   | 117888.588 | 172335.506  | 246073.736  | 267172.294  | 244250.656 | 240049.949 | 307548.16   | 277582.82  | 204399.109  | 273649.283 | 257660.64  | 243001.234 | 272524.619 | 287360.243 | 277164.483 | 238655.49   |
| O01916 | Hdc1   | Histone deacetylase 1                                     | 526.76    | 28.63     | 45075       | 9          | 111433.69   | 150661.4796 | 96859.2458  | 78826.7    | 60093.5052  | 95974.0678  | 110189.856  | 97179.5769 | 11569.3111 | 125899.445  | 19155.6907 | 92493.9757  | 103802.467 | 96723.7465 | 109937.699 | 118977.989 | 110453.466 | 112276.949 | 10412.366   |
| P70288 | Hdc2   | Histone deacetylase 2                                     | 406.17    | 19.06     | 55302       | 7          | 34819.3798  | 79453.4691  | 90073.6177  | 140203.492 | 89338.2961  | 90915.4923  | 89219.8329  | 81493.6753 | 92856.1118 | 103318.8151 | 82232.8324 | 82855.6012  | 94029.8289 | 95248.1953 | 110177.79  | 100463.066 | 90928.667  | 103762.366 | 90197.5147  |
| O88895 | Hdc3   | Histone deacetylase 3                                     | 40.77     | 4.01      | 48865       | 4          | 0.04731231  | 2504.32036  | 0.03070204  | 0.02587718 | 0.02510227  | 3443.0479   | 3502.89214  | 2089.68335 | 2899.82632 | 6732.45854  | 3218.45874 | 3350.53425  | 3591.24663 | 2663.48338 | 3344.99575 | 3059.14969 | 2388.3604  | 3289.7513  | 2734.95479  |
| P51859 | Hdgf   | Hepatoma-derived growth factor                            | 430.74    | 49.37     | 26269       | 8          | 86787.8534  | 18345.715   | 179573.982  | 11621.6611 | 119559.2131 | 220150.126  | 2440543.471 | 219166.21  | 200830.017 | 237054.04   | 209601.34  | 215860.485  | 196186.948 | 196008.186 | 181738.127 | 211512     | 210165.227 | 193551.125 | 207603.275  |
| Q3UM90 | Hdgf2  | Hepatoma-derived growth factor-related protein 2          | 64.16     | 1.35      | 74291       | 1          | 18841.7819  | 12394.0741  | 18075.0236  | 1470.5454  | 13420.6666  | 5206.38761  | 0.03877705  | 0.03838723 | 1222.92    | 16538.0612  | 2632.1638  | 16538.0612  | 3571.7101  | 15791.7506 | 16773.205  | 15390.8814 | 18650.4992 | 21042.5928 | 14324.179   |
| Q91WM2 | Hdh5   | Haloacid dehalogenase-like hydrolase domain-containing 5  | 139.97    | 7.16      | 46306       | 2          | 0.04731231  | 2529.22881  | 12820.0401  | 9472.15888 | 0.02510227  | 2009.40015  | 8173.42776  | 10063.792  | 0.03727065 | 1754.87826  | 2001.14461 | 3645.35552  | 2251.32279 | 0.03502376 | 2212.79942 | 0.03308805 | 0.03396139 | 0.03348998 | 3290.16144  |
| Q8VD73 | Hdhlp  | Virgin                                                    | 1815.6    | 30.21     | 141743      | 31         | 281375.468  | 287427.927  | 340403.85   | 261630.027 | 304708.323  | 436165.059  | 46706.8007  | 45238.8007 | 43800.69   | 47821.972   | 42272.188  | 445013.884  | 46788.962  | 466472.061 | 438960.127 | 438610.96  | 436065.778 | 465000.075 | 46208.439   |
| Q8BQM4 | Hctar3 | HEAT repeat-containing protein 3                          | 196.51    | 3.22      | 74305       | 4          | 0.04731231  | 3509.3296   | 14319.393   | 18350.8870 | 10188.0309  | 44075.6841  | 33215.6366  | 33342.8772 | 38437.2399 | 35760.366   | 42519.6068 | 42068.7054  | 36630.3494 | 31833.6291 | 24979.7716 | 39116.7748 | 41244.6369 | 34967.1613 | 49131.6236  |
| Q69Z82 | Hctd1  | E3 ubiquitin-protein ligase HECTD1                        | 56.9      | 0.65      | 290806      | 1          | 0.04731231  | 1891.02396  | 266.55478   | 4051.6992  | 2066.88016  | 2686.83968  | 2325.0306   | 2600.21758 | 3603.70296 | 2379.5549   | 3238.19709 | 3531.6089   | 2306.96515 | 5322.22489 | 2582.98193 | 4632.55106 | 3415.65233 | 2649.4613  | 3344.6528   |
| Q6N6V4 | Hctb   | DNA helicase B                                            | 41.27     | 0.74      | 121471      | 1          | 0.04731231  | 4869.70929  | 0.03070204  | 0.02587718 | 0.02510227  | 6035.76651  | 6119.9108   | 5259.76189 | 4660.4388  | 8452.38161  | 6475.71384 | 5475.31734  | 5202.44259 | 5327.73343 | 4515.56483 | 6628.17629 | 0.03396139 | 5383.60619 | 4736.28726  |
| Q60848 | Hctc   | Lymphocyte-specific helicase                              | 667.77    | 9.87      | 95126       | 6          | 7905.54131  | 3249.3791   | 32790.1123  | 49362.9437 | 35773.8871  | 38162.4983  | 34676.8157  | 45066.1366 | 34097.773  | 39958.9895  | 34048.9062 | 46379.9024  | 40601.5048 | 45406.9445 | 35059.0113 | 48548.6143 | 44240.8634 | 43805.0086 | 44890.7087  |
| EQ9A05 | Hctd2  | Helicase with zinc finger domain 2                        | 52.48     | 1.22      | 331563      | 1          | 0.04731231  | 1790.1196   | 2264.10767  | 5025.04876 | 3852.13634  | 1231.9313   | 2332.33755  | 2139.7185  | 3600.4339  | 2525.89922  | 3231.32624 | 3029.66932  | 241.58776  | 5127.4791  | 2991.5941  | 5095.2981  | 6036.91929 | 6036.91929 | 6036.91929  |
| P29416 | Hctb   |                                                           |           |           |             |            |             |             |             |            |             |             |             |            |            |             |            |             |            |            |            |            |            |            |             |

|         |          |                                                          |         |       |       |    |            |            |             |            |            |             |            |             |            |            |             |            |            |             |            |             |             |            |            |             |
|---------|----------|----------------------------------------------------------|---------|-------|-------|----|------------|------------|-------------|------------|------------|-------------|------------|-------------|------------|------------|-------------|------------|------------|-------------|------------|-------------|-------------|------------|------------|-------------|
| Q8VDM6  | Hnmpu1   | Heterogeneous nuclear ribonucleoprotein U-like protein 1 | 548.72  | 17.11 | 96002 | 11 | 61608.2808 | 97805.4169 | 73862.0524  | 109115.498 | 131106.697 | 116560.927  | 116522.542 | 141671.693  | 133681.034 | 145814.077 | 104102.446  | 128386.185 | 124354.285 | 108141.082  | 93052.3971 | 120020.906  | 100986.717  | 117662.26  | 106989.584 |             |
| Q00P19  | Hnmpu2   | Heterogeneous nuclear ribonucleoprotein U-like protein 2 | 689.28  | 17.58 | 84940 | 12 | 159410.648 | 137632.507 | 106689.575  | 210037.959 | 92691.2    | 97828.927   | 100008.055 | 105510.158  | 115743.051 | 156978.243 | 148055.864  | 140970.878 | 152121.018 | 131566.881  | 101048.144 | 148455.298  | 124059.337  | 145932.332 | 121278.337 |             |
| Q8UBJ6  | Hnmp3    | Hetero nuclear homolog 3                                 | 81.27   | 3.62  | 83218 | 2  | 0.04731231 | 0.03111494 | 4713.61926  | 0.02587718 | 0.02510227 | 4378.76059  | 7938.94459 | 8819.76043  | 7898.40057 | 635.92746  | 6512.58081  | 0.03458008 | 5018.7243  | 6113.08075  | 0.03488812 | 0.03808805  | 3323.81004  | 0.03434898 | 5678.04947 |             |
| Q3TE48  | Hlbp3    | Heterochromatin protein 1-binding protein 3              | 565.51  | 29.6  | 60687 | 13 | 51821.7758 | 116425.095 | 126199.506  | 210387.977 | 195386.255 | 98639.074   | 93706.77   | 116972.728  | 112404.365 | 104275.105 | 119254.377  | 111552.019 | 110348.903 | 115984.173  | 117625.934 | 126877.821  | 125927.655  | 118402.008 | 121599.578 |             |
| P62748  | Hlbp1    | Hippocalcin-like protein 1                               | 58.64   | 16.58 | 22338 | 4  | 0.04731231 | 0.04744785 | 2118.65018  | 0.02577718 | 0.02577718 | 3199.53258  | 8240.53074 | 81056.93948 | 414.80678  | 801.10785  | 66808.07806 | 974.259639 | 5755.90425 | 10486.833   | 15457.0062 | 9201.33493  | 3380.4213   | 701.9913   | 780.980    | 85528       |
| Q8CFE2  | Hlpl1    | Histone PARylation factor 1                              | 112.24  | 7.8   | 39291 | 2  | 0.04731231 | 13594.5178 | 85533.2683  | 2210.9274  | 12046.7928 | 21069.6733  | 26743.7748 | 23750.5458  | 21875.0917 | 23798.7585 | 245823.2109 | 20879.6447 | 21474.5961 | 10717.6948  | 21733.604  | 23564.5191  | 15142.798   | 18696.542  | 22388.8729 |             |
| P00493  | Hpr1     | Hypoxanthine-guanine phosphoribosyltransferase           | 416.45  | 40.83 | 24573 | 6  | 269284.762 | 182375.657 | 195933.714  | 68028.4462 | 95841.465  | 181491.2    | 261918.478 | 235050.863  | 187506.752 | 289937.354 | 215013.117  | 204624.493 | 265835.984 | 200160.775  | 228754.757 | 225251.602  | 192640.013  | 211444.781 | 191009.546 |             |
| P20171  | Hras     | GTPase H-Ras                                             | 171.62  | 20.11 | 21298 | 3  | 87538.6762 | 88619.6086 | 10300.3129  | 171818.76  | 108181.588 | 119316.5066 | 4478314729 | 50882.3863  | 71171.6564 | 62801.2023 | 60606.0514  | 63022.5548 | 45295.2275 | 73347.0273  | 66853.3417 | 75458.2646  | 68883.6686  | 64457.8206 |            |             |
| Q3TC93  | Hlsbp3   | HCLSI-binding protein 3                                  | 64.99   | 7.09  | 43691 | 2  | 0.04731231 | 5099.3619  | 1538.7489   | 1914.23067 | 5720.08886 | 3979.5604   | 12373.3398 | 19088.3407  | 14273.3398 | 10988.460  | 6584.75163  | 10309.9119 | 11976.1783 | 9237.70837  | 6016.10072 | 7902.39338  | 7565.40215  | 6978.91467 | 917.619    |             |
| Q8RH47  | Hls21    | Hexan sulfate 2-O-sulfotransferase 1                     | 46.6    | 2.53  | 41813 | 1  | 0.04731231 | 16727.0537 | 15695.3864  | 17031.2873 | 16126.7651 | 11185.1778  | 15315.9604 | 11660.986   | 19584.2206 | 12437.1324 | 12754.188   | 15414.7149 | 12250.6194 | 14221.1708  | 16893.2443 | 16808.6341  | 14777.5116  | 13281.4428 | 2022.1035  |             |
| O87506  | Hsd17b10 | 3-hydroxyacyl-CoA dehydrogenase type-2                   | 612.07  | 50.19 | 27419 | 8  | 138642.721 | 165377.267 | 186319.066  | 19135.215  | 133802.68  | 164400.589  | 165321.866 | 200114.034  | 12723.9789 | 179429.205 | 151677.852  | 140352.416 | 153202.964 | 195237.179  | 197909.597 | 190240.454  | 16031.166   | 193738.143 |            |             |
| O00826  | Hsd17b11 | Estradiol 17-beta-dehydrogenase 11                       | 108.06  | 11.74 | 32881 | 2  | 8383.90341 | 8486.99083 | 9281.58806  | 81031.9181 | 7106.40723 | 10568.9466  | 10464.003  | 10703.4505  | 13450.3074 | 7349.72272 | 9549.9484   | 9957.96805 | 6598.50838 | 10230.9538  | 15374.5633 | 9696.19386  | 7606.19572  | 7816.26988 | 10192.6779 |             |
| O75053  | Hsd17b12 | Very-long-chain 3-oxoacyl-CoA reductase                  | 551.98  | 32.69 | 34742 | 11 | 312645.581 | 145241.083 | 166653.86   | 141939.358 | 184085.452 | 200888.062  | 214668.143 | 210353.311  | 217348.767 | 184804.395 | 196449.608  | 180877.651 | 176619.711 | 199813.798  | 20293.448  | 187290.993  | 157538.898  | 137878.99  | 162718.056 |             |
| P51660  | P51660   | Peroxylon multifunctional enzyme type 2                  | 710.06  | 23.13 | 79482 | 13 | 284472.153 | 233644.404 | 224860.545  | 97624.3798 | 111962.011 | 254109.813  | 266455.732 | 218448.23   | 269224.237 | 215452.876 | 214037.209  | 206244.733 | 202651.931 | 261610.699  | 233975.262 | 225805.431  | 193443.011  | 169922.613 |            |             |
| O88736  | Hsd17b7  | 3-keto-steroid 17-beta-dehydrogenase                     | 98.95   | 5.09  | 37317 | 1  | 6340.9651  | 4268.65237 | 4492.19326  | 5983.32728 | 3412.94229 | 5992.18132  | 6016.03444 | 10902.3445  | 6632.90595 | 4678.429   | 6515.26556  | 7284.74096 | 6052.08183 | 6132.10128  | 6987.91444 | 9147.49215  | 6014.68221  | 5746.99493 | 5542.24818 |             |
| P50171  | Hsd17B8  | Estradiol 17-reductase                                   | 156.19  | 15.06 | 26578 | 1  | 85497.9977 | 33907.5534 | 52901.2812  | 47245.278  | 35753.1304 | 66618.8297  | 59055.4661 | 64737.6635  | 65379.6335 | 45249.2260 | 54144.4431  | 88347.7517 | 41065.1278 | 46185.8862  | 47615.7285 | 47061.1793  | 42879.7928  | 36594.4659 | 46300.7454 |             |
| Q2TPA8  | Hsd12    | Hydroxysteroid dehydrogenase-like protein 2              | 36.84   | 2.86  | 54208 | 1  | 0.04731231 | 0.03111494 | 2085.22779  | 0.02587718 | 0.02510227 | 3181.13954  | 2172.45453 | 2762.99775  | 2662.24223 | 891.220709 | 2074.04819  | 2055.60037 | 2027.64866 | 2470.54667  | 3044.77037 | 1897.5626   | 0.03396139  | 2101.9254  | 2442.80152 |             |
| O70701  | Hsp90aa1 | Heat shock protein HSP 90-alpha                          | 310.37  | 53.07 | 84788 | 50 | 3904139.6  | 2884474.1  | 2333150.9   | 201408.96  | 958120.941 | 3241972.62  | 3845474.76 | 3948781.71  | 3111391.97 | 4155438.97 | 3345893.61  | 3187405.65 | 43311.1573 | 334073.73   | 3022763.08 | 4030094.59  | 3556079.86  | 3680802.44 | 303800.84  |             |
| P11499  | Hsp90ab1 | Heat shock protein HSP 90-beta                           | 4353.79 | 70.03 | 83281 | 63 | 83168.086  | 57134.4038 | 603416.636  | 2973832.08 | 254588.864 | 7873309.309 | 892015.39  | 7291455.39  | 7921455.39 | 76.9830458 | 97.7866809  | 8464294.4  | 960389.529 | 8262540.9   | 7612847.41 | 9748025.83  | 8506075.3   | 8837664.08 | 7592044.28 |             |
| O8113   | Hsp90b1  | Endoplasmic                                              | 2302.32 | 40.71 | 92476 | 35 | 3480465.67 | 3559979.54 | 3101952.92  | 101999.41  | 1121471.75 | 2625639.76  | 2663545.54 | 260994.94   | 2622045    | 2858490.39 | 2592727.08  | 2505799.47 | 2522340    | 2398366.48  | 2661134.85 | 3096567.57  | 3349964.12  | 2927953.58 | 2737718.4  |             |
| O99M31  | Hsp44    | Heat shock 70 kDa protein 14                             | 198.91  | 18.01 | 54650 | 4  | 0.04731231 | 21142.3401 | 141151.4111 | 22953.3273 | 18247.5445 | 26885.8482  | 28649.2864 | 331107.4471 | 34236.9658 | 3373.3549  | 331107.4471 | 34236.9658 | 3373.3549  | 331107.4471 | 34236.9658 | 3373.3549   | 331107.4471 | 34236.9658 | 3373.3549  | 331107.4471 |
| Q61316  | Hsp4     | Heat shock 70 kDa protein 4                              | 2312.93 | 56.84 | 94133 | 39 | 53084.195  | 71228.6675 | 44074.7898  | 350403.843 | 725300.882 | 892973.363  | 798163.279 | 811479.479  | 936623.234 | 8694727.31 | 840707.318  | 87006.721  | 86708.733  | 862051.57   | 743989.648 | 768883.601  | 768115.412  |            |            |             |
| O60761  | Hsp45    | Heat shock reticulum chaperone BiP                       | 3023.68 | 61.16 | 72347 | 44 | 9581.394   | 1072.66371 | 7051.97376  | 349102.716 | 3314933.95 | 7545484.41  | 822843.11  | 1795580.81  | 731223.82  | 6952518.8  | 8674627.47  | 6599021.35 | 6597644.73 | 6196540.59  | 750191952  | 7538821.08  | 6801268.44  | 6627458.73 | 7215012.54 |             |
| P63017  | Hsp47    | Heat shock cognate 71 kDa protein                        | 3083.27 | 94.21 | 89834 | 27 | 12480.913  | 12480.913  | 12480.913   | 12480.913  | 12480.913  | 12480.913   | 12480.913  | 12480.913   | 12480.913  | 12480.913  | 12480.913   | 12480.913  | 12480.913  | 12480.913   | 12480.913  | 12480.913   | 12480.913   | 12480.913  | 12480.913  | 12480.913   |
| P38647  | Hsp9     | Stress-70 protein, mitochondrial                         | 1980.74 | 51.99 | 37467 | 60 | 219257.88  | 16521.5815 | 1729492.63  | 1450621.23 | 1022720.83 | 1763245.83  | 1673097.87 | 1699315.38  | 1829428.52 | 148616.614 | 1374041.3   | 157433.41  | 149334.41  | 1378938.17  | 1935831.1  | 1813213.89  | 1668951.48  | 1535791.69 | 1649028.3  |             |
| O99P31  | Hsp19    | Hsp70-binding protein                                    | 459.18  | 32.21 | 33610 | 9  | 7827.855   | 6139.4481  | 44369.8187  | 20677.0588 | 21599.5244 | 58540.7031  | 94612.5188 | 72573.8738  | 90576.0385 | 90660.633  | 8019.93071  | 85455.1127 | 93022.1304 | 79814.2381  | 65992.9514 | 106230.244  | 63311.8638  | 64557.406  | 89048.6818 |             |
| P64038  | Hspd1    | 60 kDa heat shock protein, mitochondrial                 | 3390.70 | 65.79 | 60955 | 47 | 8496260.18 | 613219.297 | 694261.88   | 4426625.72 | 3834588.66 | 664651.46   | 6688014.41 | 7135425.41  | 6988362.47 | 6208081.61 | 6052940.89  | 5935044.13 | 6093487.49 | 5136445.27  | 7315302.52 | 7086834.21  | 6593689.91  | 6141927.34 | 6446293.87 |             |
| Q64433  | Hspe1    | 10 kDa heat shock protein, mitochondrial                 | 469.99  | 68.73 | 10963 | 8  | 1163260.84 | 712940.295 | 758288.77   | 472636.508 | 315602.433 | 659441.287  | 594047.956 | 582146.599  | 615600.247 | 637896.811 | 65081.13    | 548491.443 | 627216.401 | 453770.067  | 439394.693 | 685182.949  | 593380.401  | 596310.121 | 59577.716  |             |
| Q61699  | Hsp1     | Heat shock protein 105 kDa                               | 570.99  | 15.27 | 96407 | 10 | 24326.709  | 146420.3   | 1286596.974 | 85515.5019 | 50436.0772 | 182822.314  | 199235.056 | 215444.412  | 171734.39  | 189482.515 | 182858.119  | 199996.715 | 201908.994 | 167830.481  | 187131.796 | 189352.527  | 178281.223  | 182725.94  | 185600.881 |             |
| O92269  | Huap2    | Oxidoreductase HTHATP2                                   | 77.88   | 11.16 | 26870 | 2  | 7855.39162 | 2125.4315  | 23543.6375  | 14602.146  | 16018.2684 | 39395.229   | 26075.9151 | 34779.4533  | 40529.2582 | 15177.7498 | 246390.0181 | 2334.3808  | 17825.3931 | 12954.6446  | 20487.6073 | 20415.4161  | 19008.8299  | 23202.6391 | 25655.5007 |             |
| Q8BC03  | Huaf1    | HIV Tat-specific factor 1 homolog                        | 40.98   | 1.98  | 86240 | 1  | 0.04731231 | 6903.5077  | 6817.93769  | 12521.1687 | 11096.4718 | 0.03665024  | 0.03877785 | 10594.3028  | 14355.3799 | 9962.79596 | 4729.68171  | 11405.1243 | 8033.26473 | 11566.215   | 0.03488812 | 4.137.98093 | 7258.09845  | 9331.56134 | 0.03500218 |             |
| O9JY15  | Hua2     | Serine protease HTRA2, mitochondrial                     | 173.32  | 17.47 | 49348 | 4  | 5941.3229  | 43222.1231 | 44888.6792  | 25889.147  | 38340.3852 | 58024.3832  | 50654.4737 | 45699.9129  | 68125.9867 | 36165.9203 | 56672.777   | 33966.5655 | 35884.4328 | 38464.3238  | 54026.1157 | 47105.5614  | 32131.6588  | 44626.596  | 39687.6651 |             |
| Q7TMYS8 | Huwei1   | E3 ubiquitin-protein ligase HUWE1                        | 395.84  |       |       |    |            |            |             |            |            |             |            |             |            |            |             |            |            |             |            |             |             |            |            |             |

|        |        |                                                       |         |       |        |    |             |             |             |            |             |            |            |            |             |            |            |            |            |            |            |            |            |            |            |            |
|--------|--------|-------------------------------------------------------|---------|-------|--------|----|-------------|-------------|-------------|------------|-------------|------------|------------|------------|-------------|------------|------------|------------|------------|------------|------------|------------|------------|------------|------------|------------|
| E9Q1P8 | Hf2bp2 | Interferon regulatory factor 2-binding protein 2      | 45.21   | 3.16  | 59292  | 1  | 0.04731231  | 8134.2685   | 13079.5768  | 13930.0914 | 11175.4334  | 13027.4674 | 9301.52494 | 8770.14467 | 10489.8438  | 14102.9442 | 13769.3852 | 12368.693  | 11936.3386 | 12994.6025 | 12844.9422 | 12742.1152 | 13200.2779 | 12015.3837 | 13102.7368 |            |
| P56447 | Irf5   | Interferon regulatory factor 5                        | 205.02  | 14.08 | 59600  | 4  | 0.04731231  | 24244.1053  | 14551.8742  | 10467.2554 | 14710.7963  | 10425.9696 | 32496.8328 | 38665.3574 | 41475.8894  | 41739.157  | 36275.9913 | 42631.8683 | 39180.6968 | 47329.6792 | 34921.9401 | 46191.515  | 32922.836  | 31015.8883 | 32656.3963 |            |
| Q9DCB8 | Iscat2 | Iron-sulfur cluster assembly 2 homolog, mitochondrial | 99.04   | 20.78 | 16718  | 2  | 0.04731231  | 4915.78969  | 5918.88141  | 0.02587781 | 0.02510227  | 6968.0968  | 9132.19098 | 10261.7147 | 10492.7544  | 7514.16269 | 0.03500571 | 4868.73883 | 8586.31098 | 6779.20263 | 6172.32659 | 8472.69749 | 3887.85113 | 3033.39688 | 6851.76501 |            |
| Q6I7R3 | Isoy1  | Isochortansin domain-containing protein 1             | 115.24  | 8.42  | 32002  | 2  | 18433.8669  | 17120.4964  | 14013.31009 | 5308.03717 | 14667.5514  | 40733.3841 | 32245.516  | 34600.3085 | 37661.5311  | 42218.2819 | 40759.8962 | 37775.0379 | 27662.7162 | 33502.3299 | 18786.2379 | 38172.0532 | 28176.2651 | 29240.2971 | 35869.3165 |            |
| Q332A2 | Isoy2  | Isochortansin domain-containing protein 2A            | 332.84  | 14.63 | 32002  | 1  | 33750.4489  | 27751.0477  | 14013.31009 | 5308.03717 | 14667.5514  | 40733.3841 | 32245.516  | 34600.3085 | 37661.5311  | 42218.2819 | 40759.8962 | 37775.0379 | 27662.7162 | 33502.3299 | 18786.2379 | 38172.0532 | 28176.2651 | 29240.2971 | 35869.3165 |            |
| Q69ZQ2 | Isvl   | Pre-mRNA-splicing factor ISV1 homolog                 | 54.78   | 4.91  | 32889  | 1  | 0.04731231  | 2396.01578  | 3000.03720  | 3010.46964 | 0.03665024  | 2225.27511 | 0.03837823 | 2279.57165 | 3103.979434 | 4.03500571 | 0.03548808 | 4603.82625 | 0.03502376 | 0.03488812 | 2563.51322 | 0.03396139 | 0.03434898 | 0.03500218 |            |            |
| Q9JH19 | Istaa1 | Inostol-3-phosphate synthase 1                        | 818.03  | 29.62 | 60932  | 14 | 26948.547   | 31290.235   | 259560.17   | 119053.928 | 144228.569  | 352330.486 | 427973.660 | 369430.549 | 50799.549   | 42618.678  | 41234.014  | 390989.388 | 395646.29  | 357816.996 | 363569.894 | 425421.984 | 347225.204 | 348771.189 | 363734.259 |            |
| Q60651 | Itna1  | Integrin alpha-4                                      | 51.55   | 14.4  | 115966 | 1  | 0.04731231  | 1938.79178  | 3478.34879  | 5309.09968 | 4411.35371  | 3171.61725 | 1821.24276 | 3398.53305 | 2104.1884   | 2123.04744 | 3390.34545 | 2657.21624 | 3774.68077 | 2338.21646 | 2180.52383 | 4661.63029 | 2175.89917 | 2291.49538 |            |            |
| P11638 | Itna5  | Integrin alpha-5                                      | 291.85  | 7.22  | 115043 | 6  | 36019.2497  | 22996.6553  | 81233.19785 | 102588.320 | 11278.58456 | 106790.487 | 91677.8513 | 91381.7388 | 82523.2415  | 6415.8276  | 60606.519  | 51665.9307 | 53900.6269 | 49293.5536 | 59140.056  | 72556.5551 | 61690.8698 | 38513.5607 | 57086.6235 |            |
| Q61739 | Itna6  | Integrin alpha-6                                      | 40.62   | 0.73  | 112519 | 1  | 0.04731231  | 7296.1355   | 21231.1373  | 24498.5055 | 35765.3975  | 15292.8792 | 8674.65025 | 7881.47807 | 911.24750   | 12772.4002 | 12174.1566 | 9934.9625  | 11865.4106 | 15200.7953 | 15595.2666 | 19344.1374 | 16624.2618 | 15756.6974 | 17349.0893 |            |
| P24063 | Itnal  | Integrin alpha-1                                      | 61.08   | 0.95  | 128238 | 1  | 18163.9355  | 27347.4787  | 31397.2126  | 34664.6689 | 37856.4919  | 16158.5925 | 15258.3759 | 17992.0724 | 19489.6179  | 18993.9533 | 18357.9332 | 18990.5623 | 22807.1031 | 16996.3449 | 23555.4159 | 23082.1149 | 21644.5053 | 23167.616  | 22874.5117 |            |
| P05555 | Itnam  | Integrin alpha-M                                      | 1525.94 | 24.02 | 127481 | 25 | 915458.14   | 608072.938  | 763651.28   | 965147.288 | 9835210.501 | 843285.469 | 775123.775 | 845606.869 | 823152.362  | 637083.25  | 603359.999 | 60980.358  | 56709.719  | 56704.516  | 72274.025  | 718565.368 | 650919.781 | 596257.636 | 71730.5884 |            |
| P09055 | Ihgl1  | Integrin beta-1                                       | 839.8   | 24.69 | 182321 | 15 | 305008.679  | 28124.932   | 350838.428  | 490644.179 | 462020.95   | 31045.661  | 215163.92  | 281008.894 | 308314.57   | 62744.966  | 283463.885 | 281958.474 | 26084.284  | 292925.981 | 315788.174 | 288521.247 | 251363.64  | 314418.644 |            |            |
| P11835 | Ihgl2  | Integrin beta-2                                       | 1272.66 | 32.43 | 85026  | 20 | 277231.5    | 122603.659  | 287017.952  | 338315.871 | 403782.843  | 354643.702 | 323955.093 | 353751.784 | 347327.431  | 226849.345 | 314884.87  | 201241.633 | 23078.606  | 262624.33  | 27398.923  | 257934.509 | 218601.966 | 198289.395 | 247863.816 |            |
| Q61703 | Iht2   | Inter-alpha-trypsin inhibitor heavy chain H2          | 136.59  | 4.44  | 105928 | 3  | 2669.1221   | 52403.1996  | 25510.014   | 10228.2258 | 22068.92038 | 45547.6583 | 31346.9142 | 27011.6239 | 44400.6449  | 20095.8292 | 0.03500571 | 21108.8368 | 10380.5549 | 35731.0714 | 14960.0727 | 23976.8507 | 24454.8134 | 28619.415  | 29876.0418 |            |
| Q61704 | Iht3   | Inter-alpha-trypsin inhibitor heavy chain H3          | 125.95  | 24.7  | 99358  | 3  | 15230.5647  | 23293.9171  | 24522.4184  | 13880.4832 | 18045.887   | 27209.676  | 13367.2159 | 16605.7972 | 17778.1897  | 20817.9152 | 31006.3782 | 19517.8062 | 15932.4047 | 27631.5786 | 29213.1552 | 34931.0748 | 44102.7934 | 29159.1906 | 36464.0299 |            |
| Q9D892 | Iipa   | Inosine triphosphatase                                | 69.4    | 5.56  | 21897  | 1  | 23284.7543  | 16586.0778  | 11646.0906  | 0.02587781 | 9445.07503  | 19937.9598 | 21630.8409 | 24127.7906 | 2523.0357   | 31991.575  | 22632.5085 | 26240.6957 | 30122.9747 | 17213.5137 | 22424.1905 | 21079.5716 | 17939.3476 | 19875.9401 | 12678.1445 |            |
| P70227 | Ipr3   | Inositol 1,4,5-trisphosphate receptor type 3          | 80.84   | 0.9   | 304725 | 2  | 0.04731231  | 6384.1463   | 12439.9354  | 20258.4996 | 17743.4894  | 11398.4743 | 7673.54192 | 10374.9970 | 790.2468    | 41439.7394 | 11655.2848 | 8712.33072 | 6716.40965 | 4910.97637 | 12251.0656 | 10089.3781 | 5691.36071 | 9282.50996 | 8675.07394 |            |
| Q9Z0R6 | Irs2   | Insulin receptor and BTB domain-containing protein 2  | 44.16   | 0.72  | 188908 | 1  | 0.04731231  | 9884.71406  | 14040.8221  | 0.02587781 | 10062.5791  | 21274.9903 | 19169.7805 | 14404.9832 | 20409.4512  | 13481.7222 | 16673.1108 | 17108.831  | 15811.9511 | 18443.9945 | 16695.4037 | 13749.3262 | 20222.3459 | 17491.0753 | 17505.5884 |            |
| Q9JH15 | Isvd   | Inositol-1-CoA dehydrogenase, mitochondrial           | 323.11  | 16.75 | 46325  | 2  | 78730.8796  | 103241.1443 | 91622.0936  | 68645.714  | 6144.4588   | 95240.8432 | 10430.9492 | 7329.6288  | 109264.771  | 62744.966  | 75953.4813 | 60345.2665 | 89840.8145 | 68318.166  | 71442.2222 | 63484.7385 | 70459.5401 | 65212.4151 |            |            |
| P97825 | Jpt1   | Jupiter microtubule associated homolog 1              | 120.6   | 27.27 | 16081  | 2  | 0.04731231  | 12888.8545  | 15234.2391  | 8884.3797  | 0.02510227  | 8580.26927 | 21275.7183 | 14411.8084 | 17409.5597  | 19275.704  | 21048.253  | 17943.9851 | 22229.4175 | 1743.7322  | 13767.7613 | 19248.1723 | 17182.7802 | 18800.521  | 18546.2067 |            |
| Q6P624 | Jpt2   | Jupiter microtubule associated homolog 2              | 162.14  | 21.58 | 20020  | 3  | 33804.422   | 7601.889    | 70579.3785  | 65390.8886 | 79216.3759  | 84621.6257 | 73711.2317 | 70674.3063 | 65302.8666  | 11006.8117 | 8670.867   | 7924.0872  | 84535.237  | 99013.5585 | 98980.8231 | 76619.7861 | 88591.527  | 88569.466  | 89559.03   | 71695.4185 |
| Q92257 | Jup    | Junction plakoglobin                                  | 267.31  | 10.34 | 81801  | 6  | 17123.92531 | 30065.3508  | 25630.1459  | 22038.4881 | 24395.8498  | 31856.603  | 63740.9583 | 30780.2616 | 23481.6679  | 26175.5848 | 30473.4016 | 23571.489  | 24941.9517 | 23089.327  | 39785.9354 | 34934.9573 | 25763.506  | 25006.3534 | 22972.43   |            |
| Q99M11 | Kars   | Lysine-tRNA ligase                                    | 76.38   | 29.92 | 67860  | 15 | 31630.0085  | 21605.8572  | 74304.7399  | 141094.313 | 141591.91   | 338789.745 | 343185.138 | 323079.042 | 335092.759  | 35490.145  | 289187.78  | 393098.62  | 312876.776 | 268680.119 | 303040.711 | 336178.114 | 296055.977 | 324351.192 | 27254.37   |            |
| Q55VQ0 | Kar7   | Histone acetyltransferase KAT7                        | 98.56   | 5.22  | 70641  | 2  | 0.04731231  | 2171.96697  | 13765.2055  | 18650.5452 | 11586.5427  | 6696.25581 | 11246.7789 | 13465.8245 | 814.3082    | 14707.3859 | 15267.6054 | 15005.481  | 6762.86765 | 15299.8294 | 12877.5496 | 15769.3018 | 15609.9147 | 15468.3947 | 14843.3619 |            |
| Q9Y3H4 | Kchc3  | Kelch repeat and BTB domain-containing protein 3      | 37.84   | 1.15  | 69551  | 1  | 0.04731231  | 40311.1494  | 26084.1687  | 4175.5227  | 0.02510227  | 0.04662524 | 0.03877781 | 66573.6236 | 40972.602   | 46200.208  | 1434.65141 | 587.992451 | 0.03620746 | 2124.8004  | 15776.0164 | 1601.65277 | 1601.65277 | 1601.65277 | 1601.65277 |            |
| Q62482 | Kcnab2 | Voltage-gated potassium channel subunit beta-2        | 22.07   | 22.62 | 70641  | 5  | 0.04731231  | 19894.5377  | 60303.2865  | 458.14982  | 4833.4078   | 2338.6     | 9982.4845  | 28262.608  | 4824.5876   | 1747.2499  | 19974.8852 | 23369.1693 | 24409.7579 | 13599.0875 | 19336.5329 | 21846.5119 | 23179.547  | 22585.665  |            |            |
| Q6VGW3 | Kctd12 | KBTBD-pot domain-containing protein KCTD12            | 561.19  | 4.22  | 35892  | 9  | 15502.307   | 148527.933  | 151890.356  | 76508.881  | 90103.983   | 217138.594 | 23769.424  | 175555.316 | 21614.542   | 218407.564 | 188269.668 | 210016.089 | 203450.943 | 189063.341 | 185770.27  | 182488.528 | 185384.4   | 171463.836 | 15425.948  |            |
| Q9JH17 | Kdel1  | KDEL motif-containing protein 1                       | 219.32  | 8.96  | 57985  | 4  | 0.04731231  | 8310.45345  | 3900.44891  | 37481.6727 | 6858.03282  | 4385.77453 | 47763.8707 | 8720.07067 | 8159.07917  | 9658.9198  | 6451.62759 | 7447.30615 | 7499.37331 | 7110.69765 | 8138.70893 | 9416.74321 | 8687.3385  | 7417.9943  | 7903.36337 |            |
| Q569A6 | Kdelr1 | ER lumen protein-retaining receptor 1                 | 111.71  | 14.62 | 24546  | 2  | 3629.74237  | 10550.780   | 12140.5014  | 26469.2455 | 18891.7166  | 8253.9986  | 4032.28515 | 4102.54538 | 6697.5577   | 457.8164   | 2127.2326  | 6728.65901 | 4888.6339  | 6668.02459 | 9584.58281 | 7083.51782 | 5657.62559 | 4947.46706 | 7991.05748 |            |
| Q6Z08X | Kdm1a  | Lysine-specific histone demethylase 1A                | 152.49  | 5.04  | 92831  | 4  | 0.04731231  | 26150.7416  | 21640.591   | 43552.9438 | 34211.8149  | 23291.9306 | 15885.2451 | 23550.3924 | 24768.887   | 46207.5191 | 19371.6415 | 26657.933  | 25489.1708 | 22959.3997 | 30984.1505 | 21141.943  | 25685.3903 | 25194.948  | 19758.5863 |            |
| P59997 | Kdm2a  | Lysine-specific demethylase 2A                        | 56.13   | 0.86  | 126801 | 1  | 0.04731231  | 2500.05784  | 2224.15784  | 5584.3621  | 1236.18514  | 2003.13369 | 2994.3962  | 2735.6499  | 2008.7881   | 4598.86332 | 4824.76649 | 3850.24949 | 5147.91253 | 0.03502376 | 0.03488812 | 4802.5582  | 4509.35761 | 5533.21124 | 3960.9349  |            |
| Q6GV12 | Kds2   | 3-ketodihydroxyisovalerate reductase                  | 48.72   | 4.52  | 35956  | 1  | 0.04731231  | 0.03311494  | 2325.14428  | 1928.0757  | 3631.3      |            |            |            |             |            |            |            |            |            |            |            |            |            |            |            |

|         |         |                                                         |  |         |       |        |     |             |             |             |             |             |            |            |            |            |             |            |            |            |            |            |            |             |            |            |           |
|---------|---------|---------------------------------------------------------|--|---------|-------|--------|-----|-------------|-------------|-------------|-------------|-------------|------------|------------|------------|------------|-------------|------------|------------|------------|------------|------------|------------|-------------|------------|------------|-----------|
| P21619  | Lmbh2   | Lamin-B2                                                |  | 520.9   | 15.94 | 67318  | 9   | 243663.389  | 172519.282  | 191980.988  | 198389.072  | 262085.849  | 172240.424 | 217956.972 | 219381.915 | 226922.666 | 173720.093  | 153176.92  | 174297.802 | 189908.103 | 144626.90  | 144231.25  | 186013.462 | 188179.592  | 183281.758 | 182734.703 |           |
| QC8129  | Lmp2p   | Lucy1-cystinyl aminopeptidase                           |  | 396.61  | 7.51  | 117304 | 8   | 8692.68357  | 96471.5115  | 103210.182  | 127980.184  | 119985.826  | 139497.847 | 104851.842 | 123280.047 | 136842.922 | 78968.584   | 98558.3036 | 89965.4778 | 7662.2498  | 83195.6162 | 94755.426  | 102662.316 | 84613.202   | 85937.5309 | 104573.935 |           |
| QC8CK3  | Lomp1   | Lyon phosphatase homolog, mitochondrial                 |  | 799.73  | 24.34 | 105843 | 14  | 230423.062  | 21673.344   | 198965.2    | 278893.239  | 302172.399  | 302319.442 | 256831.336 | 327636.088 | 321895.593 | 205762.118  | 238199.164 | 205237.599 | 181341.164 | 226638.849 | 234378.077 | 233909.084 | 201882.826  | 175696.884 | 218240.69  |           |
| Q1HA00  | Lpea1   | Lysophosphatidylcholine acyltransferase 1               |  | 577.23  | 5.99  | 50762  | 1   | 0.473121231 | 21063.6483  | 331193.913  | 21841.4964  | 17523.2553  | 16208.6071 | 12565.2387 | 4367.01557 | 21959.47   | 10373.489   | 10382.8921 | 11927.9026 | 2228.40311 | 2468.18842 | 7830.55784 | 10912.7415 | 11974.2897  | 11968.4726 | 10170.819  |           |
| QB8V16  | Lpea2   | Lysophosphatidylcholine acyltransferase 2               |  | 121.97  | 8.64  | 60254  | 3   | 2956.84462  | 24883.43    | 24206.2066  | 46693.2653  | 44382.4703  | 34459.5188 | 20379.9961 | 32822.077  | 39950.7758 | 20610.126   | 21753.4932 | 27934.7119 | 20223.0828 | 18834.1498 | 30540.1053 | 28350.6343 | 29101.2629  | 27093.636  | 24943.5957 |           |
| Q6N7V1  | Lpea4   | Lysophosphatidyl acyltransferase LPCAT4                 |  | 70.92   | 6.11  | 57143  | 2   | 0.07121231  | 7258.48892  | 8463.256    | 25234.14    | 17095.9348  | 1297.54386 | 4778.5221  | 7993.8693  | 1459.1756  | 5503.85897  | 4060.58252 | 12716.1723 | 16.112.179 | 11387.9268 | 8887.09446 | 8232.85485 | 11784.1362  | 14742.5528 | 21239.7144 |           |
| Q9N469  | Lpsa    | Lysenin                                                 |  | 263.87  | 17.88 | 43478  | 6   | 14742.5528  | 21239.7144  | 23019.0549  | 93524.85438 | 7836.63737  | 44364.2726 | 42012.77   | 53122.8238 | 41768.5587 | 35611.4823  | 33790.387  | 52495.2597 | 38719.8248 | 27199.8056 | 32097.461  | 35445.93   | 3812.4333   | 32304.1297 | 17241.9878 |           |
| Q60664  | Lmp     | Lymphoid-restricted limonene                            |  | 164.63  | 6.12  | 59588  | 3   | 18446.7167  | 11841.7829  | 14930.3159  | 25585.6626  | 28438.5667  | 12455.7396 | 11681.7143 | 15114.7658 | 11775.4441 | 10441.4557  | 16127.1135 | 16615.8495 | 13758.1115 | 16763.2065 | 13215.7866 | 17528.04   | 14848.719   | 15766.2507 | 20612.2333 |           |
| Q91ZX7  | Lrp1    | Prolov-domain lipoprotein receptor-related protein 1    |  | 645.88  | 32.48 | 504742 | 109 | 328483.776  | 23227.38.34 | 310081.798  | 4166165.63  | 3821067.98  | 3140323.93 | 2677716.53 | 2862203.83 | 3062203.95 | 2092788.72  | 2304494.57 | 2387293.46 | 2134651.67 | 2433580.9  | 2307447.86 | 2667620    | 2437851.44  | 2227472.62 | 2633394.46 |           |
| P25502  | Lrpap1  | Alpha-2-macroglobulin receptor-associated protein       |  | 260.70  | 15.28 | 42153  | 6   | 88485.3378  | 88294.1937  | 71124       | 56855.4007  | 5009.734    | 110830.397 | 148220.628 | 149716.327 | 139846.281 | 8725.4923   | 4978.5712  | 71427.828  | 83391.4248 | 76895.9617 | 70611.3841 | 96443.3775 | 79513.3223  | 71952.1451 | 75401.1126 |           |
| QP68B6  | Lrrpc   | Lucine-rich PRR motif-containing protein, mitochondrial |  | 1213.73 | 19.76 | 156615 | 20  | 55298.5668  | 19720.3377  | 121619.369  | 131492.779  | 109804.672  | 158557.535 | 20207.412  | 220052.556 | 226693.917 | 128486.899  | 111009.728 | 11812.414  | 112423.111 | 152801.241 | 156350.982 | 166388.369 | 115809.225  | 99493.682  | 155806.435 |           |
| QC9CR8  | Lrrc40  | Lucine-rich repeat-containing protein 40                |  | 137.78  | 4.32  | 68076  | 2   | 0.473121231 | 14794.4271  | 11527.6138  | 6483.3714   | 13672.2981  | 19120.482  | 19067.621  | 18837.7866 | 23594.763  | 21906.742   | 15578.572  | 28098.1249 | 19738.575  | 16919.9028 | 19837.5851 | 22615.6053 | 13765.2023  | 16936.3821 | 18974.3193 |           |
| QC81C9  | Lrrc41  | Lucine-rich repeat-containing protein 41                |  | 151.35  | 6.07  | 68180  | 3   | 0.473121231 | 2286.51186  | 2841.69817  | 4675.4877   | 4154.00739  | 4218.3527  | 3507.03942 | 4868.87333 | 8752.83354 | 3043.4861   | 5748.52542 | 7426.7511  | 3427.62431 | 10669.4294 | 4501.93143 | 7252.71968 | 7199.53085  | 4006.10571 | 8550.74849 |           |
| QC505F5 | Lrrc42  | Lucine-rich repeat-containing protein 42                |  | 210.41  | 12.39 | 63900  | 5   | 25627.2299  | 21564.1927  | 22364.0384  | 9694.4427   | 16528.8067  | 25556.6266 | 30897.7127 | 24852.8266 | 28947.3284 | 30259.9842  | 30574.7897 | 28045.1949 | 26835.0022 | 42351.7077 | 30583.3557 | 33006.0812 | 24042.9434  | 28883.1685 | 92001.9236 |           |
| QC3UG9  | Lrrc58  | Lucine-rich repeat-containing protein 58                |  | 61.05   | 6.01  | 40139  | 2   | 40787.5327  | 35686.8459  | 28764.2635  | 28781.361   | 44375.1686  | 26792.2276 | 12776.7213 | 19282.5063 | 9961.71208 | 33587.106   | 48054.977  | 24889.6254 | 38160.5335 | 45169.4396 | 27762.4546 | 42665.9665 | 26659.287   | 31070.276  | 29709.3133 |           |
| QC92208 | Lrrc59  | Lucine-rich repeat-containing protein 59                |  | 315.59  | 36.81 | 34877  | 7   | 109855.328  | 127031.925  | 107982.937  | 77579.9858  | 89670.6681  | 145740.379 | 245815.377 | 198919.319 | 228002.956 | 157274.660  | 192410.826 | 157916.276 | 183874.202 | 159904.193 | 19894.139  | 228207.018 | 134746.494  | 134992.738 | 196869.299 |           |
| QC3U239 | Lrrrip1 | Lucine-rich repeat Thrighless-interacting protein 1     |  | 647.42  | 24.69 | 79249  | 12  | 55482.4834  | 79233.0544  | 43302.491   | 55420.8502  | 15165.0389  | 23107.997  | 14601.919  | 149293.608 | 147180.26  | 11752.550   | 12196.145  | 133155.542 | 122853.395 | 118834.625 | 84643.8624 | 116981.974 | 119677.212  | 11362.751  | 127089.812 |           |
| QC3ML5  | Lsg1    | Large subunit G1Phase 1 homolog                         |  | 43.9    | 2.17  | 73457  | 1   | 0.473121231 | 2198.96623  | 2084.20669  | 0.02587718  | 14556.07389 | 4448.49426 | 2694.82195 | 4233.58289 | 3608.25256 | 3757.05862  | 3863.74919 | 3016.96585 | 5157.58525 | 3087.19589 | 3313.67058 | 4875.95718 | 2519.27121  | 3779.37193 | 3093.94063 |           |
| QC9D0R8 | Lsm12   | Protein LSM12 homolog                                   |  | 71.61   | 6.67  | 21701  | 1   | 27355.016   | 16145.2209  | 25695.4463  | 7694.67867  | 11379.7651  | 30366.0332 | 19942.5039 | 24870.6228 | 20266.544  | 29292.7587  | 20827.3342 | 29770.7024 | 23004.1984 | 21562.9453 | 2326.4491  | 24359.291  | 29310.1255  | 20924.9967 | 21152.9403 |           |
| QC35900 | Lsm2    | U6 snRNA-associated Sm-like protein Lsm2                |  | 120.7   | 20    | 10835  | 1   | 16038.9516  | 15201.2479  | 12955.6869  | 0.02587718  | 12298.2965  | 18815.0986 | 18438.6619 | 13846.9229 | 17396.2039 | 20839.0523  | 27039.9259 | 26949.2034 | 20264.7666 | 25292.5603 | 15200.5534 | 14763.5751 | 18334.9149  | 23675.4909 | 20095.2229 |           |
| P62311  | Lsm3    | U6 snRNA-associated Sm-like protein Lsm3                |  | 81.27   | 32.35 | 11845  | 2   | 0.473121231 | 81939.8524  | 67608.8766  | 53127.2294  | 43323.6429  | 75863.5197 | 83643.6636 | 68846.2419 | 49523.9199 | 9217.6477   | 81083.6729 | 69963.3453 | 8595.6325  | 81165.9715 | 18399.4458 | 91905.0441 | 71912.7721  | 77718.0684 | 68121.4814 |           |
| QC9XAS5 | Lsm4    | U6 snRNA-associated Sm-like protein Lsm4                |  | 76.15   | 5.84  | 15076  | 2   | 1533.4481   | 16294.085   | 9508.45891  | 14925.6028  | 11754.0979  | 10303.3825 | 10110.7408 | 8722.6845  | 6323.14831 | 14131.1747  | 14270.2152 | 15308.4802 | 12866.411  | 11946.7704 | 15821.4847 | 68183.8875 | 67725.13012 | 69905.1354 | 6001.601   |           |
| P62322  | Lsm5    | U6 snRNA-associated Sm-like protein Lsm5                |  | 68.41   | 20.88 | 9937   | 1   | 0.473121231 | 10844.1562  | 6039.4716   | 15216.0443  | 11789.5846  | 8473.97039 | 5126.79403 | 0.03837823 | 5814.81103 | 6824.41106  | 12245.6503 | 9175.12513 | 10764.2115 | 11986.0811 | 12301.7134 | 12109.8226 | 8378.8490   | 12128.5174 | 11335.9016 |           |
| QC9W44  | Lsm6    | U6 snRNA-associated Sm-like protein Lsm6                |  | 137.64  | 46.25 | 9128   | 4   | 65893.5701  | 72051.177   | 88486.8769  | 86994.3588  | 10207.54    | 84187.2419 | 79956.9789 | 288853.626 | 30243.951  | 51218.796   | 56839.9876 | 50241.9837 | 74449.7496 | 85795.4075 | 73560.7007 | 75589.4962 | 54109.953   | 80899.6856 | 80933.2885 | 38851.319 |
| QC9W07  | Lsm7    | U6 snRNA-associated Sm-like protein Lsm7                |  | 97.23   | 15.53 | 11636  | 2   | 37106.6492  | 52585.1626  | 40816.507   | 35723.8209  | 41938.5383  | 46094.9174 | 43315.2718 | 40938.2866 | 34936.6229 | 60887.9521  | 61162.3904 | 48786.9918 | 63254.871  | 48204.6779 | 47139.3748 | 52115.1029 | 53388.2529  | 58821.1816 | 53383.3126 |           |
| QC9MCA8 | Lsm8    | U6 snRNA-associated Sm-like protein Lsm8                |  | 68.22   | 64.58 | 10403  | 5   | 17861.979   | 105968.601  | 171335.268  | 114543.393  | 10607.8445  | 41733.055  | 91907.3252 | 85962.1882 | 110905.007 | 97026.271   | 104107.56  | 106827.175 | 100586.342 | 99894.6907 | 106283.586 | 119272.654 | 104303.434  | 10348.559  | 10348.559  |           |
| P19973  | Lsp1    | Luciferoyl-specific protein 1                           |  | 730.87  | 4.12  | 83714  | 10  | 516064.988  | 43417.7188  | 465622.718  | 310185.46   | 286431.938  | 497447.023 | 473655.961 | 501876.758 | 481356.85  | 468457.982  | 522303.376 | 468226.338 | 424960.538 | 516014.892 | 342215.921 | 432372.024 | 425846.429  | 416906.965 | 441482.197 |           |
| QC8LN5  | Lsu     | Lamosterol synthase                                     |  | 50.39   | 1.64  | 36141  | 1   | 0.473121231 | 28457.7244  | 5312.11907  | 0.02587718  | 3299.5753   | 7161.06217 | 6107.12891 | 6424.00941 | 9155.70871 | 5422.50391  | 6376.36484 | 7552.47109 | 3660.50817 | 0.03502376 | 7628.79599 | 6991.37799 | 5275.23887  | 521.28888  | 6273.85887 |           |
| P24527  | Ltsh4   | Leukotiene A-4 hydrolase                                |  | 376.51  | 15.06 | 69051  | 7   | 14718.7325  | 8709.1727   | 92904.5297  | 18378.8548  | 50666.8065  | 69950.8104 | 109106.615 | 93623.2317 | 133288.91  | 94647.21206 | 10020.0742 | 66564.187  | 82232.1433 | 47586.99   | 70023.371  | 62033.2821 | 79720.6226  | 102323.068 | 82446.972  |           |
| QC6FR7  | Ltv1    | Protein LTV1 homolog                                    |  | 57.63   | 2.55  | 63652  | 1   | 0.473121231 | 5180.7625   | 68179.97227 | 0.02587718  | 0.02510227  | 8661.99068 | 6341.99551 | 7413.51136 | 7337.01157 | 6457.91666  | 5660.32592 | 6654.74948 | 5628.67177 | 5312.13524 | 7623.12894 | 0.03808805 | 0.03396139  | 6266.51093 | 3947.7523  |           |
| P17897  | Luc71   | Putative RNA-binding protein Luc7-like 1                |  | 135.46  | 12.84 | 43934  | 3   | 32355.4415  | 30852.5172  | 25.24898    | 6795        | 1673.4512   | 15151.1732 | 23100.5635 | 24660.3708 | 288853.626 | 30243.951   | 51218.796  | 56839.9876 | 50241.9837 | 74449.7496 | 85795.4075 | 73560.7007 | 75589.4962  | 54109.953  | 80899.6856 |           |
| QC7MC4  | Luc72   | Putative RNA-binding protein Luc7-like 2                |  | 347.62  | 20.41 | 46583  | 7   | 14161.6504  | 67856.0663  | 61969.1659  | 34805.4994  | 46307.5257  | 55933.0663 | 61683.0117 | 28714.9305 | 66255.2291 | 102026.966  | 91656.2985 | 88790.5921 | 98855.863  | 62084.727  | 72677.3809 | 45529.6549 | 87756.9483  | 87997.3494 | 78831.1776 |           |
| QC5UF2  | Luc73   | RNA-binding protein Luc7-like 2                         |  | 482.02  | 21.76 | 51450  | 7   | 38157.3642  | 35405.9402  | 12127.6479  | 25279.5221  | 43384.8025  | 30106.467  | 46553.306  | 41834.6041 | 46146.2577 | 63221.1037  | 63221.1037 | 63221.1037 | 63221.1037 | 63221.1037 | 63221.1037 | 63221.1037 | 63221.1037  | 63221.1037 | 63221.1037 |           |
| P70202  | Lxn     | Latexin                                                 |  | 127.05  | 9.46  | 25492  | 2   | 27540.092   | 26886.9912  | 8964.61364  | 10945.7173  | 7406.28823  | 27693.0285 | 41810.0096 | 31890.6282 | 29087.2524 | 36908.0453  | 31056.7301 | 22250.9658 | 40746.5076 | 39445.0505 | 29539.501  | 36514.79   | 11776.9306  | 26548.5863 | 15229.5763 |           |
| QC8818  | Ly86    | Lymphocyte antigen 86                                   |  | 87.11   | 12.35 | 17811  | 2   | 0.473121231 | 28447.9141  | 3647.2736   | 34729.2032  | 41342.1712  |            |            |            |            |             |            |            |            |            |            |            |             |            |            |           |



|        |         |                                                                       |         |       |        |    |             |             |             |             |               |            |            |             |             |             |             |             |             |            |            |            |            |            |            |
|--------|---------|-----------------------------------------------------------------------|---------|-------|--------|----|-------------|-------------|-------------|-------------|---------------|------------|------------|-------------|-------------|-------------|-------------|-------------|-------------|------------|------------|------------|------------|------------|------------|
| Q3ULD5 | Mccc2   | Methylcrotonyl-CoA carboxylase beta chain, mitochondrial              | 88.17   | 4.26  | 61379  | 2  | 0.04731231  | 8283.00229  | 15628.5856  | 5406.5613   | 5944.83683    | 14436.9541 | 11304.6802 | 11797.0946  | 15250.3905  | 10083.9202  | 13605.2828  | 12172.7162  | 11944.4638  | 12833.7613 | 10842.2789 | 11328.4892 | 10188.791  | 4118.65238 | 11048.2614 |
| P97287 | Mcl1    | Induced myeloid leukemia cell differentiation protein Mcl-1 homolog   | 50.22   | 3.93  | 35217  | 1  | 0.04731231  | 03111494    | 0303700204  | 020587718   | 020510227     | 03665024   | 3993.35609 | 3205.84012  | 5784.17     | 030379434   | 2702.80266  | 4079.76379  | 4831.68325  | 7672.66586 | 03038812   | 5612.46563 | 4125.24858 | 4486.94939 | 5413.91404 |
| P97310 | Mcm2    | DNA replication licensing factor CM2                                  | 15054   | 35.95 | 102078 | 25 | 1.91276.275 | 428541.677  | 365846.842  | 368959.93   | 352308.08     | 465578.76  | 49670.387  | 480226.906  | 43814.19    | 505893.412  | 406954.428  | 394733.832  | 476380.639  | 418072.546 | 318764.718 | 427547.792 | 423370.916 | 46119.696  | 46156.956  |
| P25206 | Mcm3    | DNA replication licensing factor CM3                                  | 1298.34 | 33.5  | 91546  | 20 | 723515.181  | 748301.934  | 629375.557  | 487022.151  | 506993.637    | 658765.603 | 606740.357 | 744642.453  | 638008.447  | 829498.987  | 69845.51    | 723692.468  | 939363.177  | 744522.679 | 662571.746 | 699560.881 | 737653.132 | 327516.316 | 713351.91  |
| P49717 | Mcm4    | DNA replication licensing factor CM4                                  | 1020.22 | 25.87 | 96736  | 17 | 120255.182  | 271127.124  | 218089.923  | 227608.282  | 247466.17     | 254467.216 | 236760.999 | 234400.219  | 336011.281  | 281337.659  | 286707.02   | 304369.468  | 267066.798  | 288320.225 | 282081.149 | 285431.304 | 320294.763 | 204689.273 | 27412.108  |
| P49718 | Mcm5    | DNA replication licensing factor CM5                                  | 1088.75 | 30.97 | 82342  | 22 | 338633.125  | 688860.31   | 790752.562  | 665424.361  | 525317.49     | 842770.939 | 770223.132 | 794021.807  | 749898.942  | 91921.994   | 681254.767  | 761938.615  | 821878.156  | 68015.698  | 762554.756 | 784779.051 | 767613.529 | 806653.366 | 74461.378  |
| P97311 | Mcm6    | DNA replication licensing factor CM6                                  | 1179.58 | 31.06 | 92867  | 20 | 335410.815  | 40596.163   | 37962.294   | 3103.05698  | 022510227     | 195120305  | 5262.97591 | 5431.5531   | 7512.44751  | 6855.27427  | 9179.26257  | 4042.2846   | 5108.3671   | 7726.57671 | 003488812  | 1792.32857 | 6381.041   | 4092.92337 | 3444.39787 |
| Q61881 | Mcm7    | DNA replication licensing factor CM7                                  | 972.8   | 33.52 | 81211  | 19 | 256893.947  | 344877.14   | 340466.664  | 369250.93   | 324605.086    | 389017.377 | 343881.806 | 560476.764  | 373622.19   | 400226.63   | 388881.005  | 389924.192  | 396840.738  | 371508.731 | 332194.97  | 389277.686 | 366119.283 | 376528.877 | 405788.618 |
| Q8R3C0 | Mcmhp   | Mni-chromosome maintenance complex-binding protein                    | 370.98  | 17.85 | 82899  | 7  | 15220.1498  | 32683.8337  | 44964.329   | 22075.704   | 27690.0819    | 52449.2775 | 33961.888  | 57578.1577  | 57365.7304  | 68653.2314  | 65955.8323  | 59191.4381  | 65558.5778  | 72227.2239 | 59158.0539 | 68819.3561 | 51229.3232 | 59200.938  | 62981.2449 |
| B0BN27 | Mcrip1  | Mink-regulated co-repressor-interacting protein 1                     | 49.34   | 11.34 | 11101  | 1  | 0.04731231  | 1512.49697  | 4804.95352  | 020587718   | 024254541     | 7811.02772 | 5853.43197 | 4910.23137  | 6390.7672   | 7485.81541  | 5420.88636  | 5396.15772  | 6451.77945  | 5903.12979 | 6328.73755 | 6034.35986 | 3011.22467 | 5408.37991 | 4672.00907 |
| Q4G099 | Mct51   | Malg-Nipr-T-cell-activated sequence 1                                 | 121.98  | 10.44 | 20550  | 1  | 0.04731231  | 03111494    | 0298.4778   | 020587718   | 02510227      | 4215.52711 | 8131.75697 | 6757.78145  | 5506.25382  | 3783.82349  | 7474.77512  | 4904.01519  | 7754.84238  | 030502376  | 4137.35246 | 6413.95656 | 3158.16662 | 4727.70727 | 4001.43734 |
| Q9P5V9 | Mdc1    | Mediator of DNA damage checkpoint protein 1                           | 189.53  | 3.75  | 184670 | 3  | 352.61908   | 4819.55226  | 261.16855   | 10971.9421  | 10333.9409    | 6297.02589 | 41036.6643 | 6942.08332  | 8129.26621  | 11723.9637  | 10645.5787  | 6536.68401  | 9049.33103  | 11810.9667 | 6944.54728 | 7814.42008 | 10107.168  | 10716.0733 | 12314.9137 |
| P61152 | Mdi1    | Malate dehydrogenase, cytoplasmic                                     | 504.53  | 44.61 | 36159  | 9  | 375.68476   | 264759.644  | 243984.352  | 89900.474   | 119747.254    | 492337.833 | 420989.782 | 39239.590   | 41076.549   | 59269.7123  | 92599.945   | 263150.233  | 307786.674  | 254726.122 | 275555.995 | 294378.351 | 346057.612 | 295767.652 | 282142.98  |
| P08249 | Mdh2    | Malate dehydrogenase, mitochondrial                                   | 1885.96 | 83.73 | 35611  | 29 | 3774433.83  | 3359505.84  | 2911.766    | 1171256.11  | 111807.78     | 2855259.56 | 2863648.78 | 2772844.17  | 280394.978  | 24251179.65 | 2675072.68  | 2319838.15  | 24494493.1  | 216924.517 | 2948086.31 | 2381096.18 | 2453225.08 | 250013.875 | 26710.619  |
| Q9D967 | Mdp1    | Magnesium-dependent phosphatase 1                                     | 67.25   | 14.02 | 18582  | 1  | 0.04731231  | 876.75939   | 030370204   | 3103.05698  | 022510227     | 195120305  | 5262.97591 | 5431.5531   | 7512.44751  | 6855.27427  | 9179.26257  | 4042.2846   | 5108.3671   | 7726.57671 | 003488812  | 1792.32857 | 6381.041   | 4092.92337 | 3444.39787 |
| P06801 | Mel1    | NAD-dependent malic enzyme                                            | 94.39   | 31.5  | 63954  | 1  | 0.04731231  | 7808.35315  | 6496.55035  | 020587718   | 4676.23711    | 10665.192  | 11395.455  | 6628.3164   | 1243.5053   | 11075.5064  | 11095.0466  | 9649.0307   | 8801.89509  | 030488812  | 7861.70696 | 8516.25452 | 8567.0001  | 030500218  | 26712.108  |
| Q99KE1 | Me2     | NAD-dependent malic enzyme, mitochondrial                             | 730.34  | 31.24 | 65799  | 11 | 36076.953   | 10933.759   | 99607.828   | 38635.7681  | 37847.1947    | 78682.1051 | 108764.049 | 96672.1015  | 104938.284  | 9545.3198   | 91734.1862  | 68635.2319  | 88446.8464  | 69887.9867 | 102931.152 | 104986.688 | 83878.5323 | 88782.5026 | 101745.732 |
| Q9DC53 | Meer    | Enoyl-[acyl-carrier-protein] reductase, mitochondrial                 | 153.24  | 14.48 | 40343  | 2  | 0.04731231  | 31298.3491  | 3928.87804  | 1619.21796  | 02510227      | 401.22887  | 3488.5537  | 2788.55166  | 1846.01613  | 9121.762    | 2152.56605  | 4052.79136  | 18686.81659 | 3356.06133 | 3853.53557 | 4712.24173 | 3397.87728 | 1868.83695 | 2786.96013 |
| Q4Q0R9 | Memo1   | Protein MEMO1                                                         | 49.26   | 4.71  | 37679  | 1  | 0.04731231  | 4556.10638  | 030370204   | 4296.2196   | 7296.02510227 | 5203.31192 | 11228.6484 | 7469.48947  | 7147.61034  | 6764.90474  | 7567.16271  | 3977.73246  | 7324.00237  | 1319.88134 | 6944.81941 | 10154.8465 | 6668.89537 | 6162.45859 | 5097.1863  |
| Q9HEK7 | Mesd    | LKP chaperone MESP                                                    | 215.57  | 26.34 | 22507  | 5  | 80342.9699  | 158777.383  | 179085.099  | 95771.7909  | 125710.311    | 160809.918 | 162831.301 | 143256.474  | 161435.884  | 198084.77   | 152864.056  | 146997.377  | 141874.36   | 143331.271 | 148969.062 | 127972.021 | 167878.106 | 145597.42  | 173355.695 |
| Q9H948 | Menp1   | Methionine aminopeptidase 1                                           | 107.39  | 5.44  | 32221  | 6  | 5869.04819  | 61224.5687  | 91818.673   | 39087.8622  | 30351.8509    | 60118.1247 | 72773.6367 | 44751.8137  | 72944.9057  | 73803.3533  | 7007.9092   | 66148.4599  | 58002.1569  | 5018.50141 | 63608.782  | 5936.3496  | 6628.0452  | 3229.0793  | 69040.4558 |
| O08663 | Metap2  | Methionine aminopeptidase 2                                           | 107.39  | 5.44  | 32222  | 2  | 0.04731231  | 1608.41735  | 2108.44730  | 020587718   | 1093.22608    | 1027.5748  | 9470.90782 | 5140.2036   | 2866.2575   | 6977.4665   | 3908.0968   | 3524.06688  | 8364.28639  | 7496.71803 | 5288.42013 | 6820.51787 | 030396139  | 4843.17599 | 4575.47831 |
| Q9Y120 | Mettl1  | MtRNA (guanine-N7)-methyltransferase                                  | 51.03   | 5.6   | 30603  | 1  | 0.04731231  | 3170.72468  | 905.83043   | 020587718   | 02510227      | 1323.68889 | 2048.495   | 2448.70972  | 0372805.661 | 3614.33259  | 3035.62826  | 2666.03282  | 3586.174    | 5732.11238 | 2397.0729  | 3793.38401 | 3396.08073 | 2883.51603 | 2878.26839 |
| Q9Y1R5 | Mettl3  | MtRNA (guanine-N7)-methyltransferase                                  | 87.05   | 3.01  | 78757  | 2  | 6238.71562  | 2815.83432  | 5184.92867  | 3471.00542  | 02510227      | 12310.6289 | 10316.2229 | 965.41097   | 1071.00626  | 9423.1813   | 10841.5102  | 9253.29086  | 634.27945   | 8225.92625 | 10034.5088 | 7634.19869 | 5350.74132 | 5217.83099 | 9486.60951 |
| COHKD8 | Mifap8  | Mitofibrillar-associated protein 1A                                   | 146.5   | 9.7   | 51943  | 3  | 22181.916   | 2508.9756   | 27645.3067  | 42527.4149  | 48633.5585    | 13915.8061 | 14533.6417 | 15784.9864  | 19029.068   | 23097.0089  | 28684.9272  | 20488.7193  | 23104.8099  | 2421.2628  | 15303.203  | 24328.6294 | 23113.9743 | 24367.0138 | 25814.3172 |
| P21956 | Mifg8   | Lactadherin                                                           | 112.39  | 6.7   | 51254  | 3  | 77.18.24254 | 2596.9709   | 20236.61128 | 22390.9773  | 16309.2681    | 24378.5116 | 21772.1421 | 117670.8855 | 2047.5267   | 11226.4707  | 92862.921   | 20611.7013  | 18493.5895  | 17995.9106 | 26181.7111 | 33035.4661 | 29048.7629 | 24084.5899 | 25253.6429 |
| Q9Q326 | Mgat2   | Alpha-1,6-mannosylglycoprotein 2-beta-N-acetylglucosaminyltransferase | 53.26   | 2.94  | 51110  | 1  | 0.04731231  | 12854.58261 | 2648.24802  | 8921.78033  | 02510227      | 4098.31994 | 2583.03798 | 1268.62451  | 3154.52541  | 2241.22356  | 030500711   | 2740.92525  | 1859.2387   | 1104.72238 | 2004.94453 | 030380805  | 3381.98115 | 030348898  | 2801.78831 |
| Q9CPU4 | Mgat3   | N-mannan glucosylase S-transferase 3                                  | 181.54  | 24.84 | 16958  | 2  | 11422.3794  | 11884.0411  | 14788.5696  | 29548.2988  | 5561.77066    | 8958.29418 | 7505.76534 | 1216.7399   | 3556.8204   | 11077.4726  | 11831.8477  | 7089.11116  | 18571.5591  | 13595.5394 | 7834.56695 | 5113.97169 | 7990.9014  | 7900.9014  | 5804.7833  |
| QB8184 | Mia3    | Transport and Golgi organization protein 1 homolog                    | 103.06  | 1.35  | 213675 | 2  | 73407.9267  | 12008.2897  | 46597.8424  | 35612.3655  | 9885.93917    | 98031.5113 | 14701.3841 | 14481.7671  | 71778.6377  | 11109.1433  | 115300.0041 | 14322.7514  | 13568.9762  | 102401.896 | 15134.6672 | 17013.237  | 12697.4264 | 15954.3533 | 14973.8413 |
| Q8R404 | Mic13   | MICOS complex subunit MIC13                                           | 72.83   | 33.61 | 13373  | 2  | 0.04731231  | 40578.14569 | 49886.6061  | 35065.57198 | 38259.2798    | 76125.5277 | 66244.5939 | 66127.3744  | 6484.97024  | 44287.9581  | 49364.0639  | 48641.8309  | 48644.3444  | 52916.2848 | 55757.2644 | 59439.0989 | 65304.2044 | 50684.8952 | 66805.2857 |
| Q3YN34 | Micall2 | MICAL-like protein 2                                                  | 85.46   | 5.27  | 108288 | 1  | 0.04731231  | 14180.0777  | 1798.1872   | 11739.8552  | 16030.9199    | 19649.7654 | 16445.674  | 18082.7309  | 4081.3557   | 18954.6675  | 19687.7277  | 14577.9341  | 19415.9303  | 15504.0519 | 17053.6676 | 14041.9219 | 18080.2661 | 17463.9125 | 11779.039  |
| P30904 | Mif1    | Micrograph migration inhibitory factor                                | 183.07  | 17.39 | 12477  | 3  | 493403.005  | 40754.487   | 411236.579  | 162408.74   | 128657.82     | 408014.876 | 434639.346 | 375456.978  | 3420008.874 | 62919.944   | 55216.7630  | 447527.9162 | 580425.03   | 523661.999 | 545276.656 | 368847.277 | 483308.117 | 327364.691 | 1173764.91 |
| Q5BJQ2 | Mindy1  | Ubiquitin carboxyl-terminal hydrolase MINDY-1                         | 4.8     | 2.07  | 52729  | 1  | 3578.68694  | 15788.0641  | 11559.6754  | 404.43334   |               |            |            |             |             |             |             |             |             |            |            |            |            |            |            |

|         |         |                                                                                  |          |       |        |    |             |             |            |            |             |            |            |            |            |              |            |            |             |            |            |            |            |            |            |
|---------|---------|----------------------------------------------------------------------------------|----------|-------|--------|----|-------------|-------------|------------|------------|-------------|------------|------------|------------|------------|--------------|------------|------------|-------------|------------|------------|------------|------------|------------|------------|
| Q9CQV5  | Mrp24   | 28S ribosomal protein S24, mitochondrial                                         | 41.99    | 4.79  | 18901  | 1  | 0.4731231   | 7833.67741  | 4789.67927 | 7441.0883  | 0.0366204   | 8512.71243 | 8852.83901 | 7475.67679 | 7716.52319 | 6665.17242   | 7078.15387 | 5399.45591 | 6039.06498  | 9950.26912 | 10233.1686 | 4582.69825 | 7492.05567 | 6724.20779 |            |
| Q9K808  | Mrp25   | 28S ribosomal protein S25, mitochondrial                                         | 37.52    | 7.6   | 19775  | 1  | 1.0738.4598 | 8944.9771   | 7252.9647  | 7483.8877  | 7424.6199   | 10036.9857 | 9315.69911 | 7960.99393 | 9697.9474  | 7151.92717   | 12237.2652 | 11710.6609 | 7655.506    | 13364.9469 | 7574.29202 | 10965.8577 | 3022.6773  | 7171.22329 | 133646.911 |
| Q80Z53  | Mrp26   | 28S ribosomal protein S26, mitochondrial                                         | 83.84    | 10    | 23444  | 2  | 0.04731231  | 1573.7673   | 12825.4062 | 23885.7794 | 19290.194   | 14890.1927 | 12520.7401 | 20554.0575 | 21284.8712 | 20556.6081   | 18668.3375 | 17749.3346 | 10948.6206  | 741.67639  | 16650.7829 | 14372.0668 | 20331.5071 | 13588.398  | 20295.3891 |
| Q8BK72  | Mrp27   | 28S ribosomal protein S27, mitochondrial                                         | 146.92   | 9.16  | 47779  | 3  | 0.04731231  | 24567.1971  | 18598.8117 | 18858.2209 | 5457.2357   | 24995.9177 | 22830.7034 | 25779.9064 | 23932.4172 | 33814.9166   | 16068.7637 | 13731.755  | 421.80097   | 5672.40229 | 17451.6952 | 18194.6996 | 20413.1078 | 18933.404  | 22137.6789 |
| Q9CY16  | Mrp28   | 28S ribosomal protein S28, mitochondrial                                         | 206.94   | 24.73 | 20520  | 4  | 0.04731231  | 46646.5444  | 6547.1121  | 47709.5082 | 40740.3442  | 57585.2131 | 40501.4618 | 49307.7204 | 57464.8517 | 41924.6717   | 52337.2065 | 50140.2006 | 49787.1976  | 35814.0646 | 55021.2927 | 74749.4029 | 51298.6511 | 46214.9289 | 59709.731  |
| Q9D0G0  | Mrp30   | 28S ribosomal protein S30, mitochondrial                                         | 146.17   | 7.69  | 49939  | 3  | 44605.5773  | 28397.2425  | 2817.0314  | 32247.5685 | 33828.7923  | 20060.9422 | 15741.2359 | 23672.4602 | 28082.9393 | 22425.9441   | 25112.8827 | 19944.5747 | 24976.7443  | 30491.9248 | 11736.0075 | 21749.4075 | 21298.6511 | 46214.9289 | 59709.731  |
| Q9J9V9  | Mrp34   | 28S ribosomal protein S34, mitochondrial                                         | 151.62   | 13.76 | 58277  | 4  | 42358.3478  | 46638.8318  | 30296.7601 | 52390.8176 | 371155.8989 | 33123.2    | 26919.6343 | 34599.1502 | 27281.7882 | 40780.8753   | 13747.6486 | 26147.5878 | 30299.7766  | 40270.7625 | 42393.4984 | 29869.8431 | 47061.9386 | 26733.6235 |            |
| Q8JBL4  | Mrp35   | 28S ribosomal protein S35, mitochondrial                                         | 35.98    | 4.06  | 15975  | 1  | 0.04731231  | 6820.99725  | 7296.1379  | 7897.0511  | 6130.81955  | 0.0366204  | 5369.9187  | 2610.85584 | 407.2184   | 3044.2868    | 0.03500571 | 7649.03992 | 0.03620746  | 7194.73725 | 894.98484  | 8966.70248 | 7016.74115 | 5352.3471  | 5968.2193  |
| P58064  | Mrp36   | 28S ribosomal protein S6, mitochondrial                                          | 47.5     | 8     | 14309  | 1  | 0.04731231  | 3820.2575   | 4666.1933  | 0.02587718 | 6907.6905   | 7888.08375 | 2853.64267 | 2739.28149 | 437.20741  | 0.03794436   | 402.18651  | 4753.02689 | 4155.21923  | 7240.68084 | 6574.30702 | 5781.43505 | 4348.4616  | 4547.93566 | 4882.04089 |
| Q5I0K8  | Mrp7    | 28S ribosomal protein S7, mitochondrial                                          | 43.34    | 4.96  | 28197  | 1  | 11836.8589  | 9295.36699  | 7873.32227 | 4409.8796  | 8843.90152  | 12067.4511 | 8039.873   | 13278.9147 | 8867.02254 | 6157.28493   | 0.03500571 | 7626.92029 | 6347.73839  | 0.03502376 | 5746.06456 | 11685.016  | 6265.26903 | 8375.26247 | 5719.90454 |
| Q9D0H8  | Mrt4    | mRNA turnover protein 4, homolog                                                 | 337.57   | 30.96 | 27546  | 1  | 123239.866  | 150087.8811 | 104590.661 | 194960.289 | 141836.486  | 115959.701 | 106020.821 | 112660.872 | 116842.685 | 105454.159   | 149851.332 | 125434.708 | 19421.842   | 126393.761 | 152269.211 | 161943.475 | 110734.332 | 148057.185 | 134899.540 |
| P43247  | Msh2    | DNA mismatch repair protein Msh2                                                 | 690.67   | 13.48 | 104151 | 11 | 104881.608  | 57546.1368  | 46916.1722 | 34078.4122 | 47100.4625  | 8772.11144 | 95574.2964 | 108832.101 | 100673.874 | 91879.0586   | 42040.9407 | 82549.3853 | 80320.24436 | 90401.8432 | 68813.3288 | 76855.0957 | 78008.7479 | 75280.9737 | 87460.1121 |
| P54276  | Msh6    | DNA mismatch repair protein Msh6                                                 | 104.05   | 2.5   | 151084 | 2  | 0.04731231  | 4344.07683  | 11825.1031 | 16850.3721 | 5316.19604  | 18973.4494 | 18919.5605 | 23554.4317 | 21105.1663 | 18609.4865   | 19929.2127 | 7285.90665 | 18465.8811  | 17102.5295 | 18658.8811 | 22378.553  | 25551.4718 | 9446.6887  | 20733.6235 |
| P26041  | Mso1    | Moesin                                                                           | 3455.891 | 67.94 | 67667  | 55 | 5440207.71  | 50963.56    | 4902222.26 | 2719554.81 | 2902355.42  | 6513879.96 | 6659071.63 | 589324.112 | 5885282.35 | 646601.179   | 5210446.51 | 5476113.91 | 8838445.66  | 5003045.02 | 5274093.46 | 5077311.07 | 4760028.72 | 5108390.08 | 47801.0624 |
| P30204  | Msr1    | Macrophage scavenger receptor types 1 and II                                     | 326.42   | 13.76 | 50170  | 6  | 19155.857   | 90047.8628  | 92923.8891 | 12519.325  | 11094.136   | 78329.801  | 144266.225 | 144902.34  | 108833.32  | 110781.821   | 7877.965   | 81742.5721 | 125731.625  | 84212.7588 | 112115.765 | 158085.232 | 101475.575 | 98876.998  | 87806.4807 |
| Q12DWD2 | Mst1    | Protein mistah homolog 1                                                         | 135.72   | 3.22  | 61230  | 2  | 0.04731231  | 6039.3528   | 8156.9688  | 8131.7104  | 19096.861   | 11887.495  | 8145.58409 | 9783.96268 | 13304.7321 | 971919.13009 | 7899.949   | 14142.3493 | 10396.2105  | 14915.2837 | 10169.9183 | 12345.5924 | 11879.4548 | 13489.7334 | 11300.4172 |
| P02802  | Mt1     | Metallothionein-1                                                                | 108.88   | 5.74  | 6018   | 2  | 24772.9897  | 16344.9622  | 20009.9099 | 5924.6228  | 10213.2115  | 20572.6068 | 20823.6603 | 21087.5798 | 26639.1569 | 36007.9659   | 48268.5502 | 49376.5622 | 40708.5793  | 32858.1254 | 22985.8369 | 32903.3936 | 40541.0291 | 37770.7382 | 45776.6863 |
| P01798  | Mt2     | Metallothionein-2                                                                | 66.51    | 19.67 | 10175  | 1  | 12727.9494  | 8606.55211  | 11457.9665 | 5012.5121  | 10901.095   | 13083.7661 | 12152.5764 | 16508.427  | 15545.7026 | 14268.3915   | 24445.6748 | 18222.5283 | 14683.8916  | 13666.8769 | 18108.3901 | 14906.7155 | 16641.6019 | 20472.4427 |            |
| Q8K480  | Mta1    | Metastasis-associated protein MTA1                                               | 219.03   | 8.53  | 80798  | 4  | 13028.9363  | 17797.7308  | 17408.8872 | 18223.8647 | 24134.6341  | 7179.26011 | 12526.4616 | 7752.38751 | 16645.674  | 14981.2473   | 13374.5019 | 14143.4673 | 14758.5306  | 11511.1319 | 16702.4553 | 20616.4663 | 18043.7384 | 12383.0788 | 20998.2482 |
| Q9R190  | Mta2    | Metastasis-associated protein MTA2                                               | 365.05   | 19.76 | 75030  | 11 | 52380.3382  | 14704.3911  | 16850.1237 | 22671.5411 | 23436.6594  | 141140.058 | 121397.167 | 15712.1642 | 181380.677 | 186563.944   | 182866.545 | 185846.748 | 17855.971   | 188330.991 | 215168.49  | 169579.823 | 201987.527 | 158432.176 |            |
| Q9Z4K8  | Mta3    | Metastasis-associated protein MTA3                                               | 182.6    | 7.28  | 67077  | 3  | 13028.9362  | 11610.1836  | 13722.6065 | 12540.4536 | 18773.1218  | 7179.26011 | 10104.9019 | 4901.3881  | 12945.9309 | 14981.2473   | 9456.35399 | 11492.8164 | 10994.3552  | 7446.50813 | 13083.0416 | 17117.9936 | 18043.7384 | 9143.46081 | 17708.0848 |
| Q9C0C5  | Mtap    | Methyl-5'-thiodenosine phosphorylase                                             | 475.25   | 35.34 | 31062  | 6  | 58993.2285  | 17011.114   | 135542.934 | 54894.1528 | 174575.172  | 106939.403 | 188273.546 | 167006.527 | 174220.491 | 244575.387   | 236641.953 | 237683.478 | 21721.868   | 195489.729 | 220866.272 | 227700.028 | 187788.086 | 193812.168 | 164398.07  |
| Q79175  | Mth1    | Sin3-related carrier homolog 1                                                   | 207.68   | 10.5  | 41665  | 4  | 15932.2618  | 61141.0016  | 66593.2533 | 94134.8064 | 91951.1654  | 98928.092  | 72541.3765 | 4025.8473  | 94738.494  | 35425.4458   | 68033.1001 | 67955.0086 | 54790.9648  | 65950.6195 | 81564.1657 | 74364.9374 | 50616.5536 | 59847.2845 | 68897.6023 |
| Q791V5  | Mth2    | Mitochondrial carrier homolog 2                                                  | 403.88   | 44.22 | 33499  | 9  | 75117.3602  | 113650.173  | 142488.376 | 163409.229 | 197361.617  | 189958.468 | 162820.056 | 176808.922 | 17985.29   | 85458.9329   | 148774.849 | 106416.577 | 106414.962  | 143109.991 | 157411.302 | 134009.664 | 111679.741 | 118473.78  | 136093.714 |
| P00405  | Mtc2    | Cytochrome c oxidase subunit 2                                                   | 629.18   | 27.25 | 25976  | 11 | 450538.348  | 321695.48   | 419587.041 | 381769.224 | 396260.896  | 479436.462 | 456569.879 | 558909.46  | 502469.65  | 527273.665   | 352730.834 | 354683.046 | 287415.016  | 358084.258 | 421705.194 | 407387.371 | 344251.783 | 38013.263  | 419150.90  |
| Q80WJ7  | Mdh     | Protein LYRIC                                                                    | 398.5    | 18.89 | 63846  | 7  | 101940.438  | 124795.985  | 14219.148  | 145153.343 | 124933.973  | 107694.93  | 103584.424 | 12694.029  | 118833.879 | 105437.085   | 103208.068 | 187084.411 | 96739.260   | 102999.045 | 116768.013 | 125487.321 | 124298.926 | 113141.781 | 118284.192 |
| Q922D8  | Mthfd1  | C-1-tetrahydrofolate synthase, cytoplasmic                                       | 1267.38  | 30.89 | 101200 | 25 | 203154.775  | 294696.265  | 263311.61  | 136060.922 | 149890.762  | 304425.56  | 334600.052 | 332296.915 | 39055.339  | 522969.37    | 338175.578 | 354693.116 | 411305.474  | 358846.625 | 38762.407  | 402510.197 | 281703.176 | 326388.533 | 292328.600 |
| Q3V3R1  | Mthfd12 | C1-tetrahydrofolate synthase, mitochondrial                                      | 838.71   | 20.78 | 105729 | 14 | 194931.010  | 189002.703  | 172830.25  | 19291.409  | 110443.567  | 179372.633 | 155887.67  | 191890.304 | 21492.558  | 154782.745   | 202790.297 | 207644.103 | 173341.866  | 202617.555 | 282157.326 | 208699.369 | 149068.86  | 181517.371 | 197464.806 |
| P18155  | Mthfd2  | Bifunctional methyl-tetrahydrofolate dehydrogenase/cyclohydrolase, mitochondrial | 328.75   | 28.77 | 37863  | 7  | 53556.056   | 22670.245   | 20353.944  | 94510.4686 | 1079796.084 | 177828.486 | 160403.974 | 173271.159 | 156511.619 | 169943.245   | 167142.831 | 148059.078 | 167420.662  | 107963.164 | 108761.05  | 197581.282 | 129977.13  | 186683.217 | 192437.826 |
| P03921  | Mmd5    | NADH-ubiquinone oxidoreductase chain 5                                           | 138.49   | 5.44  | 68475  | 2  | 8083.0341   | 9612.29214  | 13842.7363 | 27120.668  | 16257.0867  | 7300.85314 | 9803.48845 | 8352.46956 | 18159.21   | 7017.41963   | 9767.44095 | 10863.3768 | 8057.93107  | 21721.511  | 12898.9173 | 13489.3977 | 11830.1556 | 9092.20578 | 11054.9435 |
| P62774  | Mpn     | Myotrophin                                                                       | 239.8    | 35.59 | 12861  | 3  | 0.04731231  | 50656.0765  | 78901.9279 | 53492.5412 | 39396.664   | 68147.6666 | 92794.9745 | 72485.6093 | 62799.022  | 122423.175   | 119667.392 | 7728.219   | 124909.567  | 80708.3948 | 5513.2238  | 11178.539  | 61290.312  | 9206.7624  | 23345.8223 |
| Q9CZU3  | Mtnx    | Exosome RNA helicase MTRR                                                        | 404.17   | 9.33  | 117636 | 8  | 9674.6167   | 95141.4645  | 70379.8121 | 81485.7234 | 72343.1296  | 84846.5064 | 91229.8608 | 72433.8753 | 84813.5273 | 94747.3003   | 84409.8897 | 87147.4027 | 86182.3322  | 74178.4766 | 56470.0724 | 77384.6243 | 83252.1654 | 89503.0688 | 81429.3108 |
| Q8R154  | Mts1    | Nucleoside RNA suppressor protein 1                                              | 241.07   | 8.83  | 82408  | 5  | 0.04731231  | 24638.7576  | 36131.122  | 26795.4907 | 38066.1429  | 44503.9329 | 36428.9006 | 58099.3983 | 47806.791  | 43929.4575   | 3816.4126  | 54295.2714 | 43968.2511  | 49938.3017 | 44849.3053 | 47526.3439 | 41876.3994 | 39510.1921 | 44497.5604 |
| P47802  | Mtx1    | Metaxin-1                                                                        | 76.79    | 7.26  | 35624  | 2  | 0.04731231  | 9199.3862   | 22276.4916 | 32583.5578 | 33061.9113  | 24452.3138 | 18530.0195 | 21242.2346 | 22462.3345 | 17340.8257   | 19634.355  | 22011.5374 | 18459.9289  | 13176.035  | 17552.1904 | 22156.6276 | 20031.5813 | 17058.6151 | 21462.1431 |
| O88441  | Mtx2    | Metaxin-2                                                                        | 93.85    | 18.63 | 29758  | 2  | 0.04731231  | 17556.58063 | 7578.64069 | 11257.141  | 21328.2065  | 7642.8369  | 10854.2085 | 13458.5783 | 10423.8188 | 6577.979     | 13290.6771 | 11804.9084 | 10849.0807  | 23162.5069 | 31833.7178 | 13642.8796 | 10725.4893 | 8453.5021  | 145        |

|        |         |                                                                              |          |       |        |    |             |             |             |            |             |            |            |             |            |             |            |            |            |            |            |            |            |            |             |
|--------|---------|------------------------------------------------------------------------------|----------|-------|--------|----|-------------|-------------|-------------|------------|-------------|------------|------------|-------------|------------|-------------|------------|------------|------------|------------|------------|------------|------------|------------|-------------|
| Q70145 | Ncf2    | Neutrophil cytosol factor 2                                                  | 518.48   | 29.14 | 59485  | 11 | 118320.967  | 3022441.802 | 241652.179  | 163430.345 | 150176.976  | 386553.304 | 367018.367 | 347427.627  | 325000.549 | 357697.681  | 358199.355 | 424086.952 | 352940.674 | 409888.613 | 364754.52  | 404931.149 | 307369.274 | 350259.05  | 373069.349  |
| P97360 | Ncf4    | Neutrophil cytosol factor 4                                                  | 670.34   | 50.74 | 38707  | 11 | 204699.182  | 187984.825  | 196551.728  | 174193.985 | 196485.722  | 222161.298 | 269272.566 | 244666.498  | 241263.406 | 259703.341  | 394949.896 | 266357.168 | 269800.167 | 209121.888 | 215330.086 | 276871.714 | 231406.394 | 232752.966 | 213932.632  |
| Q8K1X4 | Nckap1  | Nck-associated protein 1-like                                                | 521.71   | 11.11 | 128905 | 10 | 36713.6083  | 51360.4701  | 62344.6096  | 64276.635  | 67449.4985  | 110142.325 | 94044.7258 | 91055.3799  | 120609.21  | 73617.5373  | 65332.7512 | 68052.3986 | 63582.1968 | 72744.5092 | 67065.9964 | 71533.5864 | 66813.7457 | 58993.2486 | 599949.649  |
| P09405 | Ncl     | Nucleolin                                                                    | 2666.021 | 42.15 | 76723  | 40 | 6134896.32  | 4564538.25  | 400228.717  | 683804.297 | 5381979.75  | 2021046.09 | 3029297.83 | 2361481.64  | 2210480.84 | 4663475.48  | 9257213.01 | 4369663.58 | 4532046.1  | 452704.29  | 3833431.87 | 4720704.89 | 4054452.63 | 4622364.07 | 4417469.80  |
| QX51A1 | Ncln    | Nicalin                                                                      | 188.83   | 6.22  | 62992  | 3  | 18558.387   | 44710.1992  | 48151.1735  | 62937.3112 | 47313.5306  | 61955.5293 | 35448.1349 | 48332.7982  | 46379.4080 | 31794.1723  | 30456.3997 | 33223.3154 | 29631.653  | 28782.7047 | 37000.3892 | 38109.1674 | 34804.4985 | 32653.9377 | 40280.3527  |
| Q91W39 | Ncoa5   | Nucleo receptor coactivator 5                                                | 90.55    | 3.8   | 65319  | 2  | 0.04731231  | 11819.1613  | 16760.505   | 18375.579  | 0.03837823  | 12204.3317 | 12357.597  | 0.03837823  | 0.03727065 | 14579.3712  | 11011.0135 | 12376.3941 | 2701.60766 | 9406.30507 | 12840.4242 | 0.03808085 | 14759.6534 | 0.03434898 | 12447.7951  |
| P57116 | Nco2    | Nucleolin 2                                                                  | 165.31   | 6.36  | 78492  | 10 | 94866.5021  | 28513.138   | 11276.327   | 11245.65   | 160794.599  | 105857.794 | 92046.5059 | 94520.7329  | 66632.202  | 86366.8238  | 106075.499 | 71501.0823 | 97678.9075 | 10097.8909 | 59767.1308 | 157305.351 | 844.3762   | 124759.95  | 9384.0126   |
| Q8VBC1 | Ndc1    | Nucleoporin NDC1                                                             | 90.29    | 2.67  | 78460  | 2  | 4549.7395   | 12597.0028  | 14401.877   | 23105.0177 | 18260.9963  | 9668.30483 | 7599.2521  | 8810.65174  | 8636.61506 | 1680.9124   | 10672.9477 | 9572.64299 | 8830.96274 | 10479.8787 | 15039.5239 | 5402.23581 | 7788.47549 | 10751.447  | 8930.1031   |
| Q78P86 | Ndc12   | Nucleo distribution protein nudE-like 1                                      | 55.16    | 3.48  | 35349  | 1  | 0.04731231  | 2682.61817  | 3640.48878  | 5025778.71 | 1014.058486 | 5489.73407 | 4574.22656 | 9447.26778  | 5412.98346 | 5566.81019  | 6659.00834 | 5792.82831 | 4576.31999 | 5313.26161 | 5786.86186 | 6174.13042 | 0.03639196 | 1126.67    | 6397.49643  |
| Q62433 | Ndrp1   | Protein NDRG1                                                                | 343.89   | 26.14 | 43009  | 5  | 67669.283   | 31991.1227  | 63674.1382  | 30553.9999 | 35881.9254  | 101965.264 | 91057.3086 | 98849.2219  | 87586.305  | 76378.6168  | 82109.2722 | 74237.8211 | 73396.066  | 78608.807  | 58098.2836 | 67977.5246 | 60585.6813 | 63087.1278 | 53320.4598  |
| Q91LC3 | Ndufa10 | NADH dehydrogenase [ubiquinone] 1 alpha subcomplex subunit 10, mitochondrial | 337.17   | 19.44 | 40603  | 6  | 82758.712   | 41397.515   | 43998.5121  | 35688.281  | 58644.428   | 41905.826  | 41957.801  | 45318.4408  | 61244.705  | 28193.092   | 32876.842  | 74227.827  | 19389.657  | 39906.7557 | 34665.5757 | 41771.683  | 42249.2572 | 34722.983  | 44241.2538  |
| Q9DB84 | Ndufa11 | NADH dehydrogenase [ubiquinone] 1 alpha subcomplex subunit 11                | 115.65   | 26.24 | 14982  | 2  | 35831.2483  | 5841.68782  | 13341.8249  | 2494.35099 | 6711.92179  | 6634.70174 | 3408.70884 | 5644.83418  | 6157.6878  | 3106.50818  | 4814.14226 | 13699.0657 | 3216.23338 | 5421.75857 | 5508.86789 | 5903.2106  | 5283.36838 | 4825.86891 | 26852.95509 |
| Q7TMF3 | Ndufa12 | NADH dehydrogenase [ubiquinone] 1 alpha subcomplex subunit 12                | 119.76   | 17.93 | 17086  | 2  | 6759.21188  | 12672.3953  | 13051.5789  | 8483.11759 | 13297.3785  | 12575.736  | 12886.9986 | 14527.4096  | 9983.73049 | 6776.28826  | 15294.7041 | 15116.3661 | 10020.4378 | 14286.8458 | 16255.9147 | 14541.8205 | 7591.85756 | 7381.13473 | 14826.7971  |
| Q9ERS2 | Ndufa13 | NADH dehydrogenase [ubiquinone] 1 alpha subcomplex subunit 13                | 147.52   | 13.89 | 16860  | 3  | 78108.4092  | 67148.7957  | 68266.6217  | 60575.9472 | 58273.5896  | 58512.6977 | 52199.0219 | 70945.3346  | 65453.257  | 52249.9156  | 51413.4716 | 54179.0398 | 45393.499  | 53867.7228 | 59523.0273 | 63821.6808 | 50453.6578 | 55702.2811 | 70114.1556  |
| Q9CQ75 | Ndufa2  | NADH dehydrogenase [ubiquinone] 1 alpha subcomplex subunit 2                 | 75.5     | 14.14 | 10916  | 1  | 28407.139   | 24122.4925  | 27299.809   | 24710.1198 | 22659.1969  | 14835.5931 | 11425.7845 | 15282.1755  | 13809.7377 | 21666.402   | 19057.2482 | 19840.5191 | 18928.5259 | 17543.1573 | 22607.7826 | 23098.7308 | 22180.0552 | 21173.3934 | 22648.19    |
| Q62425 | Ndufa4  | Cytochrome c oxidase subunit NDUF4A                                          | 359.61   | 68.29 | 9327   | 6  | 67.023.0073 | 92534.3198  | 1153560.86  | 120349.365 | 114553.921  | 121780.080 | 114542.576 | 152125.534  | 126095.311 | 94940.607   | 105025.967 | 123488.467 | 87223.523  | 131867.607 | 133207.58  | 137971.887 | 107800.951 | 11039.2549 | 120049.006  |
| Q9CQZ5 | Ndufa6  | NADH dehydrogenase [ubiquinone] 1 alpha subcomplex subunit 6                 | 164.73   | 25.19 | 15283  | 3  | 4137.66585  | 44769.4031  | 78378.7364  | 79685.5862 | 85886.959   | 57631.3054 | 69331.1019 | 90648.0238  | 63882.5523 | 50610.1982  | 40235.06   | 34192.0723 | 47559.2755 | 46682.3656 | 57033.4624 | 47969.3792 | 33552.7836 | 66792.2581 | 42001.3924  |
| Q9DCJ5 | Ndufa8  | NADH dehydrogenase [ubiquinone] 1 alpha subcomplex subunit 8                 | 98.04    | 18.02 | 19992  | 2  | 18249.247   | 7781.24177  | 8420.59552  | 6105.45601 | 8467.51733  | 10687.3119 | 14329.6527 | 11045.2056  | 11208.6035 | 12516.0923  | 11363.8926 | 8017.93974 | 11405.3075 | 11759.2595 | 12816.08   | 12365.0744 | 7131.7716  | 8385.42015 | 13847.967   |
| Q9DC69 | Ndufa9  | NADH dehydrogenase [ubiquinone] 1 alpha subcomplex subunit 9, mitochondrial  | 36.92    | 23.61 | 42525  | 6  | 55894.2129  | 54413.8846  | 63855.9519  | 52406.672  | 83836.3357  | 49096.0999 | 45569.9757 | 54070.8142  | 7892.9453  | 32077.6735  | 46578.1027 | 53549.1915 | 35684.0969 | 62849.97   | 58413.6984 | 57419.0995 | 56482.4792 | 50827.4005 | 55510.5105  |
| Q9CQZ6 | Ndufb3  | NADH dehydrogenase [ubiquinone] 1 beta subcomplex subunit 3                  | 41.01    | 10.58 | 11692  | 1  | 0.04731231  | 10031.11494 | 18242.672   | 15372.259  | 10257.7979  | 18506.7532 | 19099.6166 | 226348.8478 | 1731.7667  | 15270.964   | 14298.5741 | 12100.1413 | 14525.6351 | 11019.0508 | 10202.4286 | 19533.9991 | 12781.1986 | 10851.0583 | 14902.4106  |
| Q9CQ7C | Ndufb4  | NADH dehydrogenase [ubiquinone] 1 beta subcomplex subunit 4                  | 122.11   | 37.98 | 15081  | 3  | 0.04731231  | 34343.6721  | 39722.4707  | 57988.9859 | 37101.425   | 43477.8958 | 35417.9421 | 43044.4024  | 48711.4476 | 149252.6989 | 38939.9758 | 33538.4934 | 28631.1322 | 32862.8047 | 33932.3538 | 34581.8004 | 34582.5758 | 28916.3562 | 41060.0919  |
| Q9CQH3 | Ndufb5  | NADH dehydrogenase [ubiquinone] 1 beta subcomplex subunit 5, mitochondrial   | 66.67    | 5.82  | 21710  | 1  | 0.04731231  | 23633.0137  | 19818.9529  | 13152.14   | 15121.5542  | 22449.4196 | 25644.8913 | 37060.0535  | 29053.2609 | 23539.6403  | 20120.4157 | 24288.848  | 22809.5561 | 18576.9899 | 27031.5072 | 34152.229  | 21463.765  | 26466.3655 | 29204.1268  |
| Q9CQ54 | Ndufb2  | NADH dehydrogenase [ubiquinone] 1 subunit C2                                 | 37.52    | 10.83 | 14164  | 1  | 0.04731231  | 962.626057  | 5288.87379  | 7369.12768 | 8571.9423   | 6809.42441 | 5685.51746 | 6440.62136  | 5025.83679 | 5460.6431   | 4802.01226 | 5184.88749 | 6050.39076 | 8316.97284 | 5646.86887 | 7499.91814 | 5486.73392 | 5704.40219 | 8273.0821   |
| Q91VD9 | Ndufs1  | NADH-ubiquinone oxidoreductase 75 kDa subunit, mitochondrial                 | 703.16   | 25.45 | 79777  | 15 | 279441.269  | 211565.053  | 253276.968  | 217180.901 | 231794.262  | 203847.899 | 177319.862 | 200269.459  | 911920.402 | 187943.606  | 189190.703 | 172396.681 | 174897.25  | 150102.835 | 212987.977 | 229619.075 | 185744.119 | 191054.967 | 191146.754  |
| Q91WD5 | Ndufs2  | NADH dehydrogenase [ubiquinone] iron-sulfur protein 2, mitochondrial         | 338.61   | 16.41 | 52626  | 5  | 56440.1024  | 38061.9352  | 34261.8257  | 27607.6519 | 27308.1634  | 19149.8514 | 30126.4546 | 36549.6276  | 44467.0098 | 27835.2895  | 15221.6484 | 21876.7569 | 25897.2063 | 7622.3192  | 32541.8397 | 25586.8419 | 24580.6413 | 18159.9293 | 33137.4509  |
| Q9DC7C | Ndufs3  | NADH dehydrogenase [ubiquinone] iron-sulfur protein 3, mitochondrial         | 389.09   | 30.42 | 30149  | 7  | 152440.681  | 92123.5636  | 100127.9151 | 99840.0359 | 95121.557   | 103624.64  | 97415.0334 | 104951.553  | 125838.33  | 77575.1228  | 96945.3106 | 99984.5834 | 71047.8483 | 9469.0642  | 117422.082 | 118209.086 | 87001.8083 | 86679.8811 | 111021.222  |
| Q91D70 | Ndufs7  | NADH dehydrogenase [ubiquinone] iron-sulfur protein 7, mitochondrial         | 164.59   | 6.25  | 24683  | 2  | 1748.69438  | 16082.1392  | 22145.5569  | 18884.8391 | 28124.8125  | 19549.6095 | 22207.972  | 22499.5557  | 24616.8234 | 22879.903   | 22396.8784 | 22169.317  | 21629.4599 | 22203.6285 | 22726.5985 | 27424.44   | 19455.4009 | 22475.6966 | 23427.1474  |
| Q91Y70 | Ndufv1  | NADH dehydrogenase [ubiquinone] flavoprotein 1, mitochondrial                | 609.27   | 31.47 | 50834  | 9  | 119997.207  | 111664.705  | 108465.772  | 144611.527 | 144345.446  | 126877.996 | 86365.2892 | 111284.47   | 124683.647 | 65712.0468  | 89674.1616 | 86859.3147 | 65656.7609 | 69966.0546 | 86836.3367 | 99746.9917 | 96253.5187 | 82006.4616 | 110372.754  |
| Q9CR95 | Ncap1   | Adaptin ear-binding coat-associated protein 1                                | 132.55   | 17.45 | 29639  | 1  | 0.04731231  | 22070.2286  | 19923.2609  | 15592.6081 | 11661.5314  | 35665.9645 | 25790.7971 | 22949.9887  | 24455.6138 | 27355.4984  | 28063.1317 | 23504.8698 | 25907.4061 | 32340.9133 | 22830.7231 | 30753.1947 | 17889.3289 | 27584.0041 | 26736.6430  |
| Q9D1J1 | Ncap2   | Adaptin ear-binding coat-associated protein 2                                | 264.57   | 26.32 | 28594  | 4  | 13846.3303  | 15789.294   | 21336.6869  | 11614.3197 | 9441.1064   | 17652.8749 | 14124.4203 | 10329.1859  | 22929.1688 | 21569.1988  | 16183.1349 | 22658.6562 | 16211.5366 | 23883.0639 | 16469.5783 | 17541.5694 | 20447.7846 | 17474.2024 | 17904.202   |
| P22955 | Ncd8    | NEDD8                                                                        | 173.17   | 41.98 | 8972   | 3  | 38210.4129  | 30289.5007  | 24763.6789  | 8776.8136  | 9264.6242   | 26141.5965 | 42359.0984 | 31257.3199  | 18297.5388 | 47609.4932  | 32093.3978 | 30595.8097 | 28480.8553 | 40866.1441 | 47692.116  | 44980.8722 | 22338.9987 | 45439.8399 | 40963.1662  |
| P16884 | Nefh    | Nucleofilament heavy polypeptide                                             | 82.43    | 15.9  | 115378 | 2  | 215178.348  | 121764.85   | 35040.8488  | 25656.9284 | 46109.3998  | 135373.97  | 520379.944 | 300887.458  | 820758.198 | 227680.953  | 32891.3025 | 107594.454 | 232256.043 | 181437.336 | 175852.414 | 249179.039 | 78922.063  | 159213.163 | 173856.76   |
| DZ3B65 | Nek7    | Serine/threonine-protein kinase Nek7                                         | 60.98    | 7.95  | 34529  | 2  | 5452.31517  | 14547.7767  | 11176.7050  | 0.02587718 | 10691.0239  | 23600.1042 | 25455.8094 | 19415.9378  | 18484.6605 | 21781.7368  | 25513.012  | 18798.6677 | 6658.13193 | 17409.21   | 12479.6667 | 22820.1429 | 19538.5469 | 18915.7873 | 19037.4545  |
| Q8K1R7 | Nek9    | Serine/threonine-protein kinase Nek9                                         | 179.81   | 5.39  | 107143 | 4  | 2667.39261  | 23097.5781  | 26323.2661  | 15204.5394 | 20735.7192  | 51040.7912 | 37750.2316 | 45362.8348  | 27342.1442 | 45455.5209  | 36097.81   | 46224.0996 | 35573.5217 | 36684.6721 | 34513.0251 | 52176.4667 | 20124.3015 | 36385.8344 | 28234.5183  |
| Q8BG30 | Nelfa   | Negative elongation factor A                                                 | 126.8    | 4.53  | 57585  | 2  | 4200.1      |             |             |            |             |            |            |             |            |             |            |            |            |            |            |            |            |            |             |

|        |        |                                                                  |         |       |        |    |            |           |           |           |           |            |           |           |           |           |           |           |           |            |           |            |           |           |            |
|--------|--------|------------------------------------------------------------------|---------|-------|--------|----|------------|-----------|-----------|-----------|-----------|------------|-----------|-----------|-----------|-----------|-----------|-----------|-----------|------------|-----------|------------|-----------|-----------|------------|
| Q5604  | Npe1   | NPC intracellular cholesterol transporter 1                      | 57.72   | 0.94  | 142885 | 1  | 0.04731231 | 520782825 | 69202888  | 940282913 | 86812818  | 174155304  | 189208606 | 172283234 | 214874444 | 67191258  | 129927859 | 766101323 | 733559564 | 1055092865 | 927687061 | 104363089  | 716683622 | 520602723 | 9913754092 |
| Q6420  | Npe2   | NPC intracellular cholesterol transporter 2                      | 125.65  | 24.83 | 160420 | 3  | 0.07757716 | 557037853 | 809928086 | 245972839 | 296326431 | 88614255   | 12886556  | 137764539 | 105649432 | 243391964 | 74566629  | 520054667 | 100950188 | 220974189  | 777854942 | 311101017  | 254210074 | 869784339 | 163877554  |
| Q6NSR8 | Npep11 | Probable aminopeptidase NPEP11                                   | 286.72  | 11.83 | 55940  | 5  | 0.67588487 | 490665948 | 33183386  | 376191324 | 945548067 | 58730886   | 928882292 | 587921667 | 840632746 | 485659081 | 635555247 | 612371343 | 664603072 | 929671851  | 525320266 | 800603856  | 293569837 | 625235039 | 518332395  |
| Q11011 | Npepps | Puromycin-sensitive aminopeptidase                               | 553.2   | 11.3  | 103325 | 10 | 3.96929537 | 115762287 | 11494432  | 658661683 | 48348483  | 202729328  | 147207096 | 142070665 | 17036665  | 147668162 | 191425581 | 183608029 | 167353443 | 153729949  | 11853019  | 149436341  | 138476846 | 12908285  | 163818714  |
| Q60670 | Nplc4  | Nuclear pore localization protein 4                              | 96.97   | 5.26  | 68017  | 2  | 3.79242533 | 694015286 | 824958241 | 61127433  | 935157773 | 102905857  | 128039077 | 119763906 | 15806437  | 115203509 | 13919144  | 159642985 | 837758111 | 121981817  | 148955199 | 8604010745 | 120328577 | 736731374 | 133347722  |
| P13084 | Nplm1  | Nucleophosmin                                                    | 1367.38 | 54.45 | 32560  | 20 | 246478581  | 19542514  | 174331544 | 264609355 | 271252384 | 155442837  | 182401909 | 178791759 | 55687874  | 271929049 | 198459983 | 189029256 | 233486431 | 202730104  | 18520991  | 24087315   | 232456047 | 233833616 | 189708460  |
| Q0C190 | Nplm3  | Nucleophosmin-3                                                  | 196.37  | 21.4  | 19023  | 3  | 855417416  | 476341677 | 436176687 | 83270404  | 608288729 | 112324121  | 846303535 | 253003673 | 319234188 | 607633788 | 607674908 | 494583566 | 499883966 | 616503273  | 729483776 | 545232513  | 49185633  | 505217166 | 484802131  |
| P97300 | Np1n   | Neurospatin                                                      | 130.73  | 8.56  | 44373  | 3  | 236340389  | 662204544 | 806887959 | 816852261 | 744394452 | 576993283  | 604747513 | 591173665 | 622603937 | 599698667 | 52545648  | 519291963 | 541863409 | 557611776  | 699035085 | 78026165   | 716410987 | 598823205 | 631973977  |
| Q8B1G1 | Nrd1   | Nardilysin                                                       | 339.35  | 7.24  | 142831 | 6  | 108687468  | 442544448 | 883793943 | 95094891  | 145102197 | 225914527  | 620947549 | 491703803 | 524013540 | 511763962 | 71183901  | 623775098 | 34649555  | 565670788  | 685399708 | 53619102   | 789634684 | 628874215 |            |
| P97333 | Nrp1   | Neuropilin-1                                                     | 110.54  | 3.79  | 103000 | 3  | 537747927  | 792374423 | 725456151 | 173953437 | 694141779 | 642724026  | 816379651 | 128939877 | 105453316 | 115567086 | 105886632 | 926341415 | 765684128 | 86295652   | 980522402 | 16197372   | 131183895 | 119180827 | 135336329  |
| O53276 | Nrp2   | Neuropilin-2                                                     | 35.25   | 1.08  | 103897 | 1  | 0.04731231 | 03111494  | 030702004 | 676875997 | 643774433 | 447742229  | 557062507 | 378330373 | 443073360 | 113633544 | 030500571 | 403539652 | 369710034 | 548747296  | 030488812 | 407382172  | 43525623  | 308043026 | 491792703  |
| Q8YCR4 | Nsa2   | Ribosome biogenesis protein NSA2 homolog                         | 86.56   | 10.38 | 30036  | 2  | 28395501   | 75933067  | 756830953 | 318924666 | 116133945 | 957117835  | 512015183 | 416348468 | 638069211 | 55693212  | 521220202 | 503503988 | 319574049 | 49455788   | 710754549 | 117161208  | 63315856  | 475907868 | 61861894   |
| Q8BVC7 | Nsd2   | Histone-lysine-N-methyltransferase NSD2                          | 42.89   | 0.95  | 152253 | 1  | 0.04731231 | 593737155 | 54730653  | 103592776 | 810728331 | 030665024  | 510287558 | 287572878 | 30703378  | 40912304  | 525878964 | 030545808 | 030267024 | 030502376  | 534040291 | 467746849  | 36001542  | 635344391 | 030502818  |
| Q9R110 | Nsdh   | Sterol-4-alpha-carboxylate 3-dehydrogenase, deacetylating        | 96.75   | 8.29  | 40866  | 2  | 23894774   | 189771679 | 194254526 | 132314317 | 699471618 | 219742081  | 22163061  | 221414653 | 258275931 | 217493323 | 32660588  | 211030194 | 177094952 | 257870345  | 31841622  | 348779468  | 212626922 | 2169585   | 326947281  |
| P44640 | Nsf    | Vesicle-fusing ATPase                                            | 1002.63 | 26.75 | 81626  | 17 | 209491715  | 229771619 | 171802641 | 207564260 | 215742439 | 227796114  | 275603928 | 265543373 | 277675567 | 260074911 | 260407484 | 213358953 | 231858141 | 224129834  | 233911989 | 260025543  | 196827486 | 248603905 | 325243238  |
| Q9CZ44 | Nsf1c  | NSFL1 cofactor p47                                               | 104.82  | 54.32 | 40710  | 17 | 445876507  | 501685352 | 437433858 | 177068008 | 232565044 | 48426364   | 615984681 | 480301784 | 460776405 | 594935884 | 478406185 | 490713639 | 535900529 | 458774745  | 472005565 | 494907148  | 452494899 | 511232431 | 411990580  |
| Q1HFZ0 | Nsf2   | RNA (cytosine-34-C(5))-methyltransferase                         | 493     | 18.49 | 85452  | 10 | 218022492  | 349372985 | 394272092 | 303030074 | 151227323 | 470277447  | 636819251 | 752563908 | 642514927 | 821874759 | 673992081 | 776759028 | 749898181 | 628915082  | 689519306 | 872244423  | 651593888 | 628340531 | 63051097   |
| Q9JM14 | Nsf5c  | 5'(3')-deoxynucleotidase, cytosolic type                         | 235.2   | 20    | 23076  | 4  | 110224400  | 186297199 | 238004498 | 21686408  | 218186892 | 258331756  | 272020877 | 256766434 | 332515739 | 35271181  | 383218888 | 34902293  | 323068797 | 406698841  | 373841367 | 317308458  | 267501850 | 298414215 | 342614803  |
| Q3V114 | Nsf6c  | Cytosolic purine 5'-nucleotidase                                 | 252.59  | 10.18 | 64809  | 5  | 727964285  | 372919492 | 319601555 | 650011272 | 133510081 | 429612741  | 450026077 | 379695383 | 493108868 | 561349231 | 391020741 | 44894466  | 488640295 | 455466543  | 490941564 | 469353987  | 352511664 | 576309894 | 490050873  |
| Q3UFY7 | Nsf3c  | 7-methylguanine phosphate-specific 5'-nucleotidase               | 74.92   | 6.67  | 34425  | 2  | 0.04731231 | 893035886 | 990597989 | 44543554  | 526257445 | 951634489  | 123501466 | 030387823 | 105875524 | 121481805 | 165353217 | 104013093 | 162435727 | 128865007  | 143701571 | 154013795  | 122352587 | 104294009 | 136277745  |
| Q6Q0N3 | Nsf5   | 5'-nucleotidase domain-containing protein                        | 99.06   | 3.8   | 63653  | 2  | 0.04731231 | 151924713 | 128143121 | 198075460 | 217983107 | 218930410  | 219567766 | 122501110 | 258883629 | 158174626 | 152941352 | 144024687 | 123459368 | 127765335  | 155164643 | 139784412  | 136964325 | 951164876 | 210507793  |
| Q5BJX0 | Ntm1   | N-terminal Xaa-Pro-Lys-N-methyltransferase 1                     | 53.32   | 2.14  | 25464  | 1  | 0.04731231 | 456873666 | 263119135 | 319979269 | 121672649 | 4458993259 | 448020718 | 350177925 | 681105236 | 660595678 | 599599661 | 462329175 | 858412045 | 393023581  | 677651304 | 412235129  | 564861876 | 673975803 |            |
| Q9R060 | Nubp1  | Cytosolic Fe-S cluster assembly factor NUBP1                     | 42.26   | 5.62  | 34085  | 1  | 0.04731231 | 03111494  | 030702004 | 986073761 | 102510227 | 030665024  | 853646017 | 030372605 | 681016539 | 702639508 | 836513585 | 030520760 | 030502376 | 991415677  | 74957416  | 030396139  | 60344898  | 891873027 |            |
| Q82819 | Nub1   | Nucleobindin-1                                                   | 304.41  | 13.94 | 53409  | 5  | 510579007  | 515983205 | 52671653  | 278627285 | 232003673 | 546766432  | 48382153  | 522094794 | 592390559 | 431738945 | 507194441 | 402765965 | 404637897 | 465157137  | 41051188  | 48358294   | 481345238 | 397917293 | 475259737  |
| P81117 | Nucb2  | Nucleobindin-2                                                   | 94.36   | 5.95  | 50304  | 2  | 187016428  | 101614115 | 806650233 | 030257718 | 102510227 | 030665024  | 182334706 | 182258448 | 144825759 | 118487512 | 131392802 | 960887121 | 157213842 | 138764363  | 115548868 | 142886672  | 802403745 | 112470624 | 133082952  |
| Q80XU3 | Nucks1 | Nuclear ubiquitin casein and cyclin-dependent kinase substrate 1 | 103.66  | 10.26 | 26313  | 2  | 552529648  | 417863685 | 402225448 | 284892313 | 306725154 | 417938816  | 402129379 | 429119999 | 268842580 | 588025602 | 463010763 | 507398765 | 517030883 | 395401707  | 307600859 | 429323876  | 510421959 | 4583782   | 38695397   |
| O53685 | Nude   | Nuclear migration protein nudC                                   | 992.58  | 54.22 | 38358  | 19 | 739599832  | 618264664 | 541921347 | 254542567 | 329511048 | 627487192  | 885675312 | 781439657 | 582109188 | 922039310 | 762710753 | 733989069 | 869698152 | 146054312  | 665841023 | 860147164  | 743058359 | 557538192 | 594498363  |
| Q6P1P5 | Nudc1  | NuA domain-containing protein 1                                  | 179.93  | 12.03 | 66705  | 5  | 107233327  | 38946045  | 419689079 | 490439296 | 683085798 | 533838545  | 464352299 | 476601129 | 462846930 | 642364228 | 452652881 | 527622502 | 605933871 | 456636775  | 420727995 | 510599004  | 619542107 | 556869707 | 34069885   |
| Q5M423 | Nudc2  | NuA domain-containing protein 2                                  | 356.7   | 43.95 | 17674  | 6  | 422896012  | 55416942  | 675769849 | 249753154 | 364242451 | 76676848   | 716542012 | 60044402  | 628986466 | 863497145 | 850813517 | 848708522 | 820021393 | 73927224   | 69791902  | 740282247  | 750452092 | 86605732  | 810630917  |
| Q8R1N4 | Nudc3  | NuA domain-containing protein 3                                  | 40.24   | 3.31  | 40890  | 1  | 0.04731231 | 143644200 | 158148144 | 708549151 | 495121668 | 262229325  | 171252795 | 116470573 | 145661164 | 647261260 | 122038665 | 153820148 | 148184731 | 17176797   | 188947923 | 162491363  | 168752471 | 212941022 | 162370733  |
| Q6P3D0 | Nud16  | Bis(snoRNA)-deacetylase                                          | 115.72  | 11.79 | 21825  | 2  | 0.04731231 | 983181347 | 405239463 | 262892736 | 333917960 | 100395362  | 872643158 | 719921314 | 500926999 | 705508083 | 141310948 | 100476958 | 125429326 | 104763424  | 107864612 | 131525219  | 666313195 | 112533053 | 810948396  |
| P56380 | Nud2   | Bis(S-nucleosyl)-tetraphosphates [asymmetrical]                  | 58.76   | 5.44  | 16989  | 2  | 0.04731231 | 127114134 | 819950757 | 265947322 | 551174166 | 182092519  | 155930732 | 153758167 | 112205760 | 241990228 | 148582848 | 854180183 | 118232401 | 107558101  | 145761596 | 117369751  | 757957423 | 109949748 | 113134794  |
| Q4KM65 | Nud21  | Cleavage and polyadenylation specificity factor subunit 5        | 384.5   | 36.12 | 26240  | 7  | 881052589  | 142014424 | 12203631  | 110618665 | 126709984 | 136311208  | 132002129 | 124239676 | 144290126 | 161044577 | 177440407 | 143624614 | 164868609 | 155557559  | 14255341  | 160556956  | 139414639 | 174637974 | 156461658  |
| Q566C7 | Nud3   | Diphosphorylated polyphosphate phosphohydrolase 1                | 62.93   | 8.33  | 19096  | 1  | 0.04731231 | 445682497 | 451671939 | 567605551 | 102510227 | 030665024  | 796663564 | 500234208 | 498829127 | 303579443 | 404009804 | 281071082 | 831570611 | 662874159  | 5487699   | 568578283  | 5         |           |            |

|        |          |                                                                   |          |       |        |     |             |             |             |             |             |            |             |             |             |             |            |            |            |            |            |            |            |            |             |            |
|--------|----------|-------------------------------------------------------------------|----------|-------|--------|-----|-------------|-------------|-------------|-------------|-------------|------------|-------------|-------------|-------------|-------------|------------|------------|------------|------------|------------|------------|------------|------------|-------------|------------|
| P5080  | Pa2g4    | Proliferation-associated protein 2G4                              | 1172.82  | 61.17 | 43699  | 20  | 732551.9    | 686129.608  | 561609.901  | 368333.144  | 486336.025  | 663906.239 | 901098.632  | 702011.828  | 710234.958  | 914911.386  | 675788.626 | 685980.036 | 845086.621 | 566276.725 | 766319.045 | 790128.616 | 681688.161 | 757005.105 | 625295.802  |            |
| P2931  | Pabp1    | Polyadenylate-binding protein 1                                   | 1989.39  | 60.22 | 70741  | 33  | 1798737.23  | 1979986.94  | 174081.713  | 991131.808  | 1062627.772 | 1981876.37 | 1988844.27  | 1932329.448 | 1838181.31  | 2320810.85  | 2056453.38 | 2013289.45 | 2154466.65 | 2149435.63 | 2407873.88 | 2443372.06 | 1951061.4  | 2330842.62 | 2101678.43  |            |
| Q8CC6  | Pabp1    | Polyadenylate-binding protein 1                                   | 294.72   | 28.48 | 32297  | 4   | 72637.154   | 78282.871   | 160926.287  | 203847.788  | 144392.788  | 127030.324 | 114456.592  | 995366.642  | 1029644.71  | 153024.755  | 117694.505 | 118335.699 | 122553.325 | 105593.9   | 146237.77  | 138636.105 | 98979.816  | 123697.342 | 119986.112  |            |
| Q9QY17 | Pacsin2  | Protein kinase C and casein kinase substrate in neurons 2 protein | 1624.127 | 8.4   | 55978  | 4   | 10224.1307  | 38284.832   | 229293.5148 | 2426.05297  | 11425.7525  | 47529.0526 | 68055.7682  | 59033.616   | 25935.1609  | 72526.8888  | 26951.7772 | 51249.9543 | 61461.3253 | 21355.1078 | 36210.5852 | 49162.5444 | 51022.978  | 53449.7822 | 21059.4824  |            |
| Q4V886 | Par1     | RNA polymerase II-associated factor 1 homolog                     | 70.45    | 2.62  | 60546  | 1   | 1970.54751  | 5735.37833  | 3971.24818  | 7579.61578  | 5883.62181  | 0.03665024 | 0.03877705  | 0.03837823  | 0.03727605  | 0.03794434  | 0.03500571 | 5419.67529 | 4984.04317 | 0.03502736 | 6416.98269 | 6200.45821 | 7958.72341 | 5523.68464 | 0.03500218  |            |
| P63004 | Pafla1h1 | Platelet-activating factor acetylhydrolase IB subunit alpha       | 395.36   | 22.68 | 46670  | 8   | 114566.541  | 138939.518  | 129059.938  | 4021.1475   | 40084.3152  | 127530.514 | 132746.745  | 126149.194  | 157372.262  | 145851.093  | 129520.326 | 156029.867 | 118990.375 | 124816.43  | 108804.725 | 135624.378 | 164587.058 | 138786.768 | 114776.536  |            |
| O35264 | Pafla1b2 | Platelet-activating factor acetylhydrolase IB subunit alpha       | 801.13   | 12.23 | 25581  | 2   | 81551.1134  | 73134.5198  | 57214.9173  | 37609.4888  | 15463.9805  | 79515.4363 | 6427.8041   | 47786.983   | 54472.1907  | 48895.9593  | 112064.007 | 53582.586  | 92893.4601 | 107518.155 | 60440.8907 | 58678.3801 | 57044.2443 | 54663.6135 |             |            |
| O35263 | Pafla1b3 | Platelet-activating factor acetylhydrolase IB subunit gamma       | 65.54    | 3.88  | 25863  | 1   | 12112.5367  | 14953.4027  | 12504.6275  | 8306.57944  | 5790.3242   | 26360.0205 | 21877.5211  | 17280.7001  | 21089.7944  | 18129.6001  | 23869.3651 | 19921.3014 | 16308.7393 | 22983.3451 | 23248.6446 | 15859.4574 | 12029.3339 | 13564.73   | 14420.6995  |            |
| Q9DCL9 | Paics    | Multifunctional protein ADE2                                      | 593.84   | 32.71 | 47006  | 12  | 79856.8831  | 245448.511  | 271314.322  | 237519.175  | 26058.237   | 397563.071 | 342135.249  | 404776.374  | 360190.294  | 345597.61   | 329856.18  | 328061.65  | 27316.827  | 326009.767 | 375373.654 | 358331.835 | 285159.341 | 316534.257 | 295447.602  |            |
| Q9DCE5 | Pak1ip1  | p21-activated protein kinase-interacting protein 1                | 305.75   | 15.97 | 42116  | 6   | 13841.9894  | 75686.1064  | 86541.6248  | 6480.3376   | 93171.6189  | 85438.9941 | 66196.1614  | 68131.1382  | 68659.6652  | 88551.521   | 85021.7844 | 76461.9335 | 91133.1867 | 117.25     | 906.95233  | 7945       | 99485.7077 | 87941.9105 | 90328.5846  | 66647.0637 |
| Q8C1N4 | Pak2     | Serine/threonine-protein kinase PAK 2                             | 936.55   | 36.45 | 57930  | 14  | 38152.7662  | 175644.327  | 181964.228  | 115514.744  | 111210.349  | 215839.802 | 217904.992  | 220660.227  | 170137.006  | 2351.0765   | 2565.49296 | 2407.0767  | 2985.8769  | 6260.87243 | 3159.48793 | 3667.2486  | 1198.17662 | 1661.06717 | 2920.33174  |            |
| Q61036 | Pak3     | Serine/threonine-protein kinase PAK 3                             | 417.75   | 13.95 | 62398  | 7   | 14041.7879  | 88587.428   | 90419.2152  | 68025.1598  | 57920.476   | 112217.828 | 102220.053  | 94892.7331  | 67796.8216  | 121345.507  | 11043.609  | 91982.8652 | 112703.891 | 89232.1283 | 95779.9157 | 106988.024 | 124371.96  | 98458.4307 | 95444.7704  |            |
| Q8C0L6 | Paox     | Perioxin-N(1)-acetyl-spermine/spermidine oxidase                  | 82.37    | 3.17  | 55447  | 1   | 40473.2321  | 7694.19149  | 4768.06812  | 1025778.711 | 5015.10962  | 15094.4491 | 7340.1659   | 8851.4423   | 10556.6199  | 10785.3927  | 9897.47402 | 9929.48316 | 9475.78361 | 10730.141  | 13080.3924 | 10929.0527 | 8357.01357 | 10821.5096 | 9525.19047  |            |
| Q61183 | Papola   | Poly(A) polymerase alpha                                          | 94.89    | 2.84  | 82309  | 2   | 0.04731231  | 0.03111494  | 4480.21287  | 2297.79207  | 4424.17545  | 9035.75621 | 7632.30252  | 6711.102    | 6948.42364  | 5041.90849  | 6099.24043 | 5544.28278 | 10884.8015 | 0.03502736 | 5895.89864 | 5312.1313  | 6842.28897 | 7138.93473 | 7749.59459  |            |
| Q60967 | Paps1    | Bifunctional 3'-phosphoadenosine 5'-phosphosulfate synthase 1     | 370.69   | 16.67 | 70074  | 6   | 17723.0881  | 28716.0541  | 32306.0907  | 33775.3217  | 4366.89244  | 36728.3584 | 31751.722   | 27148.1474  | 32660.224   | 21258.361   | 12952.236  | 2191.8094  | 27236.3212 | 34093.3274 | 34293.4895 | 27163.0014 | 15726.6655 | 20547.8727 | 17639.2574  |            |
| Q991X0 | Parf7    | Protein/nucleic acid deglycase DJ-1                               | 862.06   | 85.71 | 20291  | 14  | 850246.251  | 729243.284  | 776149.23   | 246058.231  | 499465.114  | 702625.521 | 141303.949  | 629349.099  | 519251.972  | 1010660.98  | 1031668.89 | 918954.544 | 1002646.86 | 940766.225 | 876595.216 | 936957.982 | 617697.910 |            |             |            |
| P19110 | Parp1    | Poly [ADP-ribose] polymerase 1                                    | 976.93   | 25.77 | 113100 | 18  | 178634.328  | 174549.735  | 164965.416  | 148925.343  | 173837.5    | 210839.866 | 259778.974  | 21475.064   | 217363.619  | 360625.511  | 248444.245 | 289343.602 | 277931.558 | 266863.31  | 245116.292 | 225405.681 | 233515.84  | 232892.339 | 256220.255  |            |
| O88554 | Parp2    | Poly [ADP-ribose] polymerase 2                                    | 36.22    | 2.33  | 63117  | 10  | 0.04731231  | 3323.53811  | 3035.55965  | 0.02587718  | 2594.09708  | 6334.9664  | 2007.40601  | 1966.30564  | 2345.3064   | 2355.49296  | 0.03500571 | 2407.0767  | 2985.8769  | 6260.87243 | 3159.48793 | 3667.2486  | 1198.17662 | 1661.06717 | 2920.33174  |            |
| Q9D0B6 | Pbd1     | Protein PBD1                                                      | 153.66   | 19.19 | 22223  | 3   | 0.04731231  | 12628.0888  | 15245.6764  | 18201.6611  | 6798.54972  | 24752.9877 | 33355.3471  | 27415.9142  | 29030.9591  | 27798.4125  | 21291.1903 | 16686.5785 | 28465.999  | 23424.1081 | 42642.4911 | 22070.5083 | 3515.4022  | 12723.2962 | 14478.10231 |            |
| Q9J7H8 | Pbk      | Lymphokine-activated killer T-cell-originated protein kinase      | 54.25    | 3.94  | 36745  | 1   | 0.04731231  | 7065.5270   | 8119.30692  | 2211.2061   | 9607.76453  | 7355.58165 | 30229.57411 | 7745.1394   | 59562.64833 | 10319.7886  | 8817.44474 | 12505.8703 | 7554.24852 | 9501.00257 | 9516.56946 | 7419.84641 | 7247.67485 | 6046.04131 | 6918.71348  |            |
| Q8B5Q9 | Pbrm1    | Protein polybromo-1                                               | 45.3     | 0.61  | 187188 | 1   | 0.04731231  | 4087.02211  | 3668.57231  | 16090.6567  | 7718.8966   | 2713.97437 | 2236.41902  | 2103.41366  | 2996.65766  | 4487.30545  | 0.03500571 | 3753.49965 | 4779.578   | 2580.73763 | 3735.88088 | 0.03808805 | 5472.58227 | 5999.21144 | 3835.70423  |            |
| A2V21D | Pbxip1   | Pre-B-cell leukemia transcription factor-interacting protein 1    | 61.13    | 2.49  | 80276  | 1   | 0.04731231  | 2047.00131  | 2604.28239  | 2605.47523  | 2091.82203  | 3352.78057 | 4234.00062  | 1904.47526  | 1905.10429  | 4142.51111  | 2408.94782 | 4429.20068 | 3888.84855 | 4554.85202 | 3135.18527 | 2725.91225 | 6635.23081 |            |             |            |
| P60335 | Pcbp1    | Poly(C)-binding protein 1                                         | 1292.53  | 65.73 | 37498  | 17  | 1666228.257 | 9220.8033   | 1189677.73  | 73574.6733  | 809662.752  | 1453131.47 | 126320.208  | 1270334.48  | 12835447.47 | 1450900.03  | 127092.59  | 125859.117 | 128256.598 | 1137915.15 | 1433113.68 | 1447487.9  | 1335476.33 | 1292574.3  | 1343056.83  |            |
| Q61990 | Pcbp2    | Poly(C)-binding protein 2                                         | 955.25   | 46.96 | 38222  | 13  | 1051893.51  | 7210.385    | 107035.268  | 64435.685   | 714812.266  | 1070358.46 | 910439.869  | 9600.548    | 942844.182  | 991369.238  | 853460.509 | 912751.255 | 91672.011  | 817800.571 | 1056256.54 | 1045654.53 | 1134620.94 | 963787.423 | 1014077.28  |            |
| P14882 | Pcca     | Propionyl-CoA carboxylase alpha chain, mitochondrial              | 41.72    | 2.04  | 81623  | 1   | 9251.50186  | 3482.99209  | 6659.02644  | 4672.45593  | 0.02510227  | 0.03665024 | 5136.39387  | 0.03837823  | 6090.42321  | 0.03794434  | 1303.72242 | 0.03545808 | 0.03620746 | 0.03502736 | 3465.70918 | 0.03808805 | 5608.8893  | 0.03434898 | 0.03500218  |            |
| P07633 | Pccb     | Propionyl-CoA carboxylase beta chain, mitochondrial               | 94.66    | 2.96  | 58626  | 1   | 0.04731231  | 8895.73924  | 8024.35274  | 8164.57284  | 0.02510227  | 7733.08825 | 6586.81249  | 8742.8516   | 6999.799    | 5491.15528  | 5959.25172 | 6060.88641 | 6629.9971  | 5628.54606 | 7629.65075 | 9278.52759 | 5998.84194 | 6997.96273 | 6706.62794  |            |
| Q8BHQ4 | Pck2     | Phosphoenolpyruvate carboxykinase (GTP), mitochondrial            | 791.3    | 35.94 | 70528  | 14  | 2744334.69  | 294673.116  | 262832.006  | 16399.889   | 124941.002  | 306019.925 | 276980.746  | 266502.978  | 291307.587  | 227467.193  | 245204.944 | 228225.515 | 218502.186 | 228167.36  | 283601.903 | 279286.401 | 253607.684 | 236885.046 | 250222.911  |            |
| Q9CQX4 | Pek1     | PCNA-associated factor                                            | 42.71    | 14.55 | 11993  | 4   | 8097.57295  | 4130.90028  | 6035.26377  | 7315.43977  | 8600.84995  | 4883.21554 | 5386.85543  | 6105.08885  | 4455.00936  | 4928.27104  | 7038.38838 | 10599.2696 | 7273.44842 | 8584.47507 | 7182.24878 | 6877.66251 | 7095.01638 | 6677.25675 | 6765.21037  |            |
| P17918 | Pena     | Proteolytic nuclear actin regulator                               | 1734.93  | 66.67 | 28785  | 22  | 999126.846  | 1288987.251 | 1109563.61  | 173905.951  | 874632.498  | 1555404.41 | 1706229.859 | 1577480.66  | 1419372.46  | 1479030.732 | 1549054.77 | 1660044.41 | 1718951.19 | 1381776.08 | 1515955.81 | 1645890.61 | 1389133.69 | 1380145.04 | 136480.514  |            |
| Q6P8H4 | Pemp     | PEST interfering signal-containing nuclear protein                | 174.26   | 35.96 | 18963  | 5   | 116625.589  | 104042.695  | 113541.863  | 94053.167   | 99788.4267  | 103543.021 | 162166.886  | 105878.08   | 1129420.34  | 117533.457  | 10111.659  | 105713.905 | 105148.32  | 88539.287  | 108256.356 | 126962.068 | 107224.952 | 100826.758 |             |            |
| Q9CQV9 | Peyo1    | Prolyl-4-hydroxylase                                              | 375.63   | 21.98 | 56495  | 6   | 1800.68518  | 62951.6387  | 60567.6755  | 77100.887   | 64984.7568  | 64392.715  | 63406.4772  | 64429.08    | 8953.5037   | 49254.352   | 66102.4917 | 65805.5608 | 81388.4896 | 57223.5117 | 66627.5574 | 56155.2286 | 45347.3084 | 50135.642  | 61681.9639  |            |
| Q8C7K6 | Peyox11  | Prolyl-4-hydroxylase                                              | 45.75    | 4.85  | 54875  | 1   | 0.04731231  | 5044.1928   | 4427.82288  | 4441.72882  | 3182.591    | 574.022414 | 1172.88758  | 675.87148   | 2154.72148  | 2073.28434  | 2572.39905 | 2301.05484 | 2315.29305 | 4370.80048 | 4142.98637 | 3763.33864 | 6205.3282  | 2625.09988 | 3590.19591  |            |
| Q9Z2E4 | Pcy2     | Ethanolamine-phosphate cytidylyltransferase                       | 127.31   | 7.18  | 45255  | 3</ |             |             |             |             |             |            |             |             |             |             |            |            |            |            |            |            |            |            |             |            |

|        |         |                                                                                    |          |       |            |           |            |            |             |             |             |            |            |             |             |             |             |             |             |             |             |             |             |             |             |             |             |
|--------|---------|------------------------------------------------------------------------------------|----------|-------|------------|-----------|------------|------------|-------------|-------------|-------------|------------|------------|-------------|-------------|-------------|-------------|-------------|-------------|-------------|-------------|-------------|-------------|-------------|-------------|-------------|-------------|
| Q9DCD0 | Pgd     | 6-phosphogluconate dehydrogenase, decarboxylating                                  | 1873.08  | 56.52 | 53247      | 26        | 1685896.42 | 1793660.45 | 1688480.39  | 823828.95   | 1086274.36  | 2055485.29 | 2387460.21 | 2144995.97  | 2020308.98  | 2618250.79  | 2181558.17  | 2081038.63  | 2548470.37  | 2134321.2   | 1907018.17  | 2537349.74  | 1979841.77  | 2054045.29  | 1856489.83  |             |             |
| P09411 | Pgk1    | Phosphoglycerate kinase 1                                                          | 2549.8   | 77.94 | 44550      | 37        | 1093396.9  | 7691533.12 | 246654.92   | 3594954.21  | 4600876.59  | 8738997.3  | 9711941.84 | 8430079.18  | 6588889.05  | 11366109.7  | 1056501.55  | 10462362.8  | 10561821    | 10225426.2  | 9315752.87  | 9612901.02  | 8977572.87  | 9113179.75  | 8870173.75  | 806104.25   |             |
| Q9C060 | Pgls    | 6-phosphogluconolactonase                                                          | 786.36   | 87.16 | 27254      | 13        | 140459.748 | 371820.815 | 286544.883  | 17121.095   | 157776.39   | 372119.304 | 33379.258  | 313550.47   | 300083.894  | 42922.487   | 447290.278  | 36670.991   | 414164.415  | 383877.479  | 391946.253  | 410686.558  | 299970.446  | 405784.936  | 306014.025  | 104239.019  |             |
| Q9D949 | Pgml1   | Phosphoglucomutase-1                                                               | 431.85   | 17.08 | 61418      | 7         | 52171.7982 | 66149.235  | 66865.964   | 23574.8115  | 34380.2741  | 74123.3711 | 99572.624  | 88367.8674  | 89773.6663  | 91924.885   | 87473.8955  | 89495.0167  | 99554.6622  | 74302.2243  | 81040.5212  | 95879.2269  | 93987.9121  | 82350.0115  | 66607.1471  | 104239.019  |             |
| Q7S3V4 | Pgn2    | Phosphoglucomutase-2                                                               | 95.08    | 3.23  | 68748      | 2         | 0.04731231 | 1124.2645  | 10368.4038  | 0.02587718  | 9318.88755  | 1725.1487  | 1833.6651  | 10419.8473  | 20257.5336  | 16974.5704  | 15720.1253  | 0.03545808  | 0.03262746  | 8973.79818  | 11576.4514  | 15556.073   | 18040.2491  | 17474.2903  | 1038208.02  | 104239.019  |             |
| Q9C9V6 | Pgn3    | Phosphoacetylglucosamine mutase                                                    | 43.72    | 14.88 | 59453      | 1         | 0.04731231 | 0.03111494 | 0.030700204 | 2014.793511 | 4209.25707  | 4219.66248 | 5458.5288  | 2382.25614  | 4174.4289   | 3309.24462  | 4064.82636  | 3850.551    | 4775.61828  | 0.03488812  | 4274.63865  | 2265.12219  | 2045.70914  | 1660.1261   | 104239.019  | 104239.019  |             |
| Q9C8P8 | Pgp     | Glycerol-3-phosphate phosphatase                                                   | 436.34   | 35.2  | 34541      | 8         | 57934.0124 | 95225.7158 | 89123.5432  | 14071.6444  | 27702.1153  | 10993.241  | 12759.3447 | 114368.041  | 113613.938  | 145621.814  | 132562.514  | 132538.433  | 135726.388  | 118133.669  | 119498.414  | 132600.225  | 127217.118  | 117421.723  | 112916.022  | 104239.019  |             |
| OS5022 | Pgrmc1  | Membrane-associated progesterone receptor component 2                              | 263.57   | 22.05 | 21694      | 4         | 48269.3434 | 32708.9746 | 31895.1363  | 48892.5066  | 33752.55    | 30159.8734 | 20695.0367 | 32098.3474  | 37889.9447  | 28664.2265  | 33229.8689  | 34860.273   | 32988.8994  | 33821.8494  | 25278.6013  | 36942.6212  | 32054.7342  | 27246.2399  | 373660.6282 | 104239.019  |             |
| Q80U19 | Pgrmc2  | Membrane-associated progesterone receptor component 2                              | 3929.738 | 32.93 | 29292.0435 | 55412.149 | 6725.6736  | 35683.5793 | 35063.2619  | 41346.0073  | 37979.955   | 3017.3608  | 43329.3232 | 34125.4442  | 30063.8635  | 35120.8152  | 35461.0662  | 39506.3775  | 30054.8393  | 30027.6445  | 3571.7048   |             |             |             |             |             |             |
| Q8BHF7 | Pgs1    | CDP-diacetylglucosyl-glycerol-3-phosphate 3-phosphatidyltransferase, mitochondrial | 105.02   | 4.16  | 62489      | 2         | 0.04731231 | 7789.80911 | 7451.36248  | 8016.67582  | 9486.24438  | 6505.65864 | 11157.8643 | 12717.0328  | 12623.7983  | 7592.51301  | 8750.82378  | 8574.61331  | 8301.73293  | 7454.25066  | 807.34939   | 8820.04979  | 4384.53558  | 58213.1531  | 10420.1198  | 104239.019  |             |
| Q63068 | Phax    | Phosphorylated adapter RNA export protein                                          | 46.11    | 2.86  | 43166      | 1         | 0.04731231 | 8011.33398 | 5049.75866  | 4723.72186  | 5846.89179  | 4469.93524 | 7442.1162  | 6325.48654  | 4801.74233  | 12453.2883  | 9933.63054  | 13072.1048  | 7361.44432  | 9017.39243  | 9644.24586  | 12018.8423  | 6823.15903  | 6690.30438  | 10380.6636  | 104239.019  |             |
| P67778 | Pbh     | Prohibitin                                                                         | 1327.79  | 83.46 | 29820      | 20        | 21166.119  | 1270667.27 | 1609766.72  | 1870083.53  | 1744827.724 | 1641729.48 | 1544537.84 | 13627919.65 | 10071173.25 | 13627919.65 | 10071173.25 | 13627919.65 | 10071173.25 | 13627919.65 | 10071173.25 | 13627919.65 | 10071173.25 | 13627919.65 | 10071173.25 | 13627919.65 | 10071173.25 |
| Q35129 | Pbh2    | Prohibitin-2                                                                       | 1314.53  | 74.25 | 32306      | 22        | 1667962.97 | 1213602.09 | 1453223.22  | 16328.6661  | 16381.5659  | 1538780.8  | 1259587.29 | 1462833.85  | 1499464.35  | 965420.468  | 1128020.55  | 1078296.51  | 966021.79   | 111936.64   | 1301905.65  | 1459904.61  | 1183663.63  | 1159163.75  | 1342105.35  | 104239.019  |             |
| Q4V7A6 | Phf10   | PHD finger protein 10                                                              | 39.26    | 2.41  | 55884      | 1         | 0.04731231 | 5028.00574 | 3015.42057  | 2704.6437   | 2274.52711  | 12119.0209 | 5092.77938 | 7598.85904  | 6538.32732  | 5513.5699   | 8064.34497  | 7804.00006  | 3279.13334  | 3638.77683  | 6898.30564  | 4703.09488  | 5507.34373  | 8880.96553  | 7831.95245  | 104239.019  |             |
| PK870  | Phf5a   | PHD finger-like domain-containing protein 5A                                       | 325.43   | 47.25 | 12405      | 5         | 54946.8843 | 59828.6161 | 66989.3317  | 81439.2058  | 12503.15895 | 31468.508  | 23587.254  | 57137.3471  | 32019.6758  | 33795.8924  | 44872.7769  | 20754.7609  | 40963.7889  | 49586.384   | 68743.9709  | 5233.5583   | 31969.3735  | 104239.019  | 104239.019  | 104239.019  |             |
| Q9DAK9 | Phf14   | 14 kDa phosphohistidine phosphatase                                                | 42.81    | 19.35 | 13997      | 1         | 0.04731231 | 2106.8655  | 3309.1009   | 0.02587718  | 9298.81012  | 2418.09513 | 3648.0032  | 3504.75623  | 3717.73723  | 6459.64799  | 6105.14146  | 4534.29362  | 8157.10634  | 992.439051  | 4389.4604   | 5172.27847  | 4603.4954   | 5764.62509  | 104239.019  |             |             |
| Q2TBE6 | P4k2a   | Phosphatidylinositol 4-kinase type 2-alpha                                         | 64.34    | 1.88  | 54258      | 1         | 23899.4600 | 7159.67615 | 8596.23419  | 17197.2749  | 15069.4277  | 13372.7194 | 11391.5482 | 8212.52698  | 17816.6792  | 9166.3908   | 25001.4906  | 14721.4917  | 7163.70234  | 9355.31257  | 14169.931   | 8689.72202  | 3613.85303  | 10034.0238  | 10966.618   | 104239.019  |             |
| Q7M6Y3 | Picalm  | Phosphatidylinositol-binding clathrin assembly protein                             | 541.26   | 21.97 | 71543      | 10        | 158683.966 | 95363.695  | 101245.444  | 40712.564   | 99015.6408  | 11717.7083 | 13240.2337 | 125751.078  | 132407.897  | 119194.308  | 115630.989  | 119795.42   | 112030.921  | 7945.1966   | 97368.5638  | 136043.28   | 130019.255  | 114676.621  | 104239.019  | 104239.019  |             |
| Q9CXY9 | Pigk    | GP1-anchoy transaminase                                                            | 111.1    | 5.57  | 44895      | 2         | 4451.19334 | 16740.4263 | 15919.6478  | 39531.9693  | 32651.417   | 23709.073  | 14260.8685 | 16366.3938  | 23292.814   | 15130.7622  | 15499.8835  | 19900.3099  | 13212.4324  | 17855.3613  | 11565.5991  | 20546.8769  | 20521.4786  | 15745.8378  | 20776.9689  | 104239.019  |             |
| Q9PD26 | Pigs    | GP1 transaminase component PIG-S                                                   | 289.1    | 12.07 | 61711      | 6         | 33207.601  | 39901.1667 | 48419.398   | 80324.1186  | 62043.2079  | 55287.4449 | 47449.5939 | 48789.1825  | 5702.3859   | 38929.6205  | 30405.1512  | 29613.9179  | 31958.926   | 32741.7516  | 53446.3449  | 23038.1779  | 28616.699   | 31625.6708  | 23491.262   | 104239.019  |             |
| Q9BXQ2 | Pigt    | GP1 transaminase component PIG-T                                                   | 183.99   | 7.9   | 65705      | 4         | 44589.3965 | 11633.942  | 61885.4415  | 61410.2922  | 113897.923  | 9113.0441  | 11264.009  | 133888.29   | 124318.639  | 3404.5113   | 115660.831  | 116855.856  | 112418.522  | 126745.399  | 64264.8727  | 7966.2553   | 81846.5206  | 8621.5457   | 111961.684  | 104239.019  |             |
| Q9CQJ2 | Pih1d1  | PIH1 domain-containing protein 1                                                   | 83.14    | 10.69 | 32209      | 2         | 0.04731231 | 4680.17282 | 10373.3561  | 8702.79145  | 11613.7629  | 4083.07509 | 6228.55615 | 11766.5475  | 2493.2325   | 7668.8747   | 13771.48    | 12195.0294  | 16394.1255  | 14082.0005  | 13221.8866  | 14046.1973  | 11489.8041  | 12839.9867  | 15755.906   | 104239.019  |             |
| Q9EQ32 | Pik3ap1 | Phosphoinositide 3-kinase adapter protein 1                                        | 207.3    | 6.04  | 90928      | 4         | 42350.3767 | 34030.6052 | 20644.0413  | 2835.87654  | 12366.8068  | 19293.9059 | 30618.8068 | 28118.8068  | 19929.3909  | 30618.8068  | 28118.8068  | 19929.3909  | 30618.8068  | 28118.8068  | 19929.3909  | 30618.8068  | 28118.8068  | 19929.3909  | 30618.8068  | 104239.019  |             |
| P26450 | Pik3r1  | Phosphatidylinositol 3-kinase regulatory subunit alpha                             | 48.96    | 1.66  | 83517      | 1         | 0.04731231 | 4307.74783 | 3716.31843  | 0.02587718  | 3457.86707  | 4848.05257 | 4902.13646 | 5963.99601  | 6609.44482  | 4346.31848  | 5223.60611  | 4842.73193  | 5009.59369  | 6963.81601  | 5444.89772  | 4439.78632  | 3381.86194  | 4880.60676  | 4049.13931  | 104239.019  |             |
| Q9CQR7 | Pin1    | Peptidyl-prolyl cis-trans isomerase NIMA-interacting 1                             | 134.52   | 20.61 | 18370      | 2         | 0.04731231 | 38339.9861 | 26525.4443  | 22536.3958  | 21235.6984  | 27400.555  | 36889.8682 | 24733.1424  | 31783.7859  | 46890.1841  | 44220.12227 | 43944.1186  | 46396.3281  | 35294.1303  | 49468.157   | 40895.0438  | 44189.3779  | 39233.7644  | 39912.126   | 104239.019  |             |
| Q9CWW6 | Pin4    | Peptidyl-prolyl cis-trans isomerase NIMA-interacting 4                             | 138.04   | 40.16 | 13815      | 3         | 23091.788  | 32457.5843 | 31593.6615  | 43694.2591  | 41687.7447  | 36072.7385 | 29556.4146 | 22626.7747  | 33596.1575  | 46960.1818  | 37821.3684  | 35577.7297  | 37975.8231  | 31508.1971  | 34389.1287  | 35732.8783  | 34855.7102  | 34778.8473  | 25552.6249  | 104239.019  |             |
| O88377 | Pip4k2b | Phosphatidylinositol 5-phosphate 4-kinase type-2 beta                              | 62.76    | 3.37  | 47264      | 1         | 0.04731231 | 0.03111494 | 0.030700204 | 0.02587718  | 0.02510277  | 8932.53356 | 4909.83703 | 4878.98849  | 4007.027605 | 2929.87626  | 4461.10568  | 6601.9446   | 6383.36654  | 8577.8397   | 0.0388812   | 0.03808805  | 2229.17542  | 0.03434898  | 0.0262.647  | 104239.019  |             |
| Q4V888 | Pip4p2  | Type 2 phosphatidylinositol 4,5-bisphosphate 4-phosphatase                         | 44.37    | 3.89  | 28024      | 1         | 0.04731231 | 0.03111494 | 12226.4392  | 20041.8354  | 16103.282   | 10669.807  | 0.03877705 | 14316.1555  | 12821.5109  | 2815.5029   | 10975.012   | 9388.41167  | 8766.63964  | 9670.48932  | 8848.94773  | 8349.51256  | 11357.9777  | 11086.5443  | 12713.08    | 104239.019  |             |
| P16446 | Pitpa   | Phosphatidylinositol transfer protein alpha isoform                                | 271.48   | 28.78 | 31907      | 5         | 13928.1046 | 6292.8991  | 84765.727   | 46044.7388  | 36285.3933  | 106819.707 | 134492.876 | 102902.731  | 93667.1193  | 117491.756  | 28019.6634  | 6538.8168   | 11618.823   | 98221.748   | 68723.2782  | 108284.741  | 102634.447  | 87467.1941  | 78680.922   | 104239.019  |             |
| P53811 | Pitpb   | Phosphatidylinositol transfer protein beta isoform                                 | 261.21   | 27.68 | 31487      | 6         | 16981.5049 | 69992.8163 | 61717.9388  | 24580.0398  | 39450.5816  | 81338.8039 | 94793.6658 | 30814.2111  | 68006.073   | 99148.5847  | 73875.6478  | 89173.8454  | 82066.2716  | 81190.8751  | 97795.3793  | 83196.8339  | 77239.6643  | 79399.7142  | 104239.019  |             |             |
| Q8R807 | Pitd    | Presequence protease, mitochondrial                                                | 253.68   | 9.46  | 61732      | 6         | 0.04731231 | 27897.6552 | 32773.1186  | 20552.1488  | 7362.86551  | 26558.9166 | 4004.3318  | 37499.426   | 43954.962   | 20007.2815  | 14858.2466  | 2382.1768   | 2850.1526   | 19894.961   | 24873.901   | 248480.722  | 2900        |             |             |             |             |

|        |           |                                                                  |         |       |        |    |             |             |             |             |            |            |             |             |            |             |             |             |             |            |            |            |            |            |            |
|--------|-----------|------------------------------------------------------------------|---------|-------|--------|----|-------------|-------------|-------------|-------------|------------|------------|-------------|-------------|------------|-------------|-------------|-------------|-------------|------------|------------|------------|------------|------------|------------|
| Q8K202 | Po1c2     | DNA-directed RNA polymerase I subunit RPA49                      | 115.42  | 4.56  | 54034  | 2  | 9227.60748  | 8964.72403  | 8468.31323  | 15148.2063  | 13247.0641 | 1870.74424 | 1878.79377  | 2371.32212  | 2612.16437 | 2479.2665   | 8481.71199  | 2694.52942  | 2513.35909  | 4452.52598 | 7703.63381 | 9473.53953 | 8145.90008 | 10849.8905 | 1817.53219 |
| OR0875 | Po1c2a    | DNA-directed RNA polymerase II subunit RPB1                      | 413.27  | 6.35  | 217176 | 9  | 0.04731231  | 15838.2077  | 16058.8346  | 16203.6589  | 14759.0397 | 18813.3508 | 14073.0019  | 138959.9499 | 14199.5729 | 37708.2523  | 15291.4825  | 13989.9827  | 14321.778   | 14981.5399 | 13224.7985 | 15201.6399 | 11983.2842 | 16211.7634 | 15182.2059 |
| Q8CF17 | Po1b2b    | DNA-directed RNA polymerase II subunit RPB2                      | 271.56  | 4.51  | 133911 | 7  | 25380.3928  | 48220.9661  | 198570.0064 | 64984.3734  | 68111.7662 | 40264.9391 | 34893.5104  | 35904.4538  | 39732.1787 | 55612.3441  | 38613.4863  | 37659.7194  | 37831.1904  | 44025.6335 | 25299.3969 | 39916.2501 | 41048.9641 | 50780.922  | 36106.0297 |
| P49760 | Po1c2a    | DNA-directed RNA polymerase II subunit RPB3                      | 108.16  | 10.18 | 31443  | 2  | 0.04731231  | 11364.8216  | 8450.39952  | 37793.0754  | 35999.1884 | 11826.3447 | 21999.6616  | 113550.0214 | 13084.2565 | 035005071   | 29257.3736  | 7132.0522   | 13814.8334  | 2990.21337 | 14970.6787 | 030396139  | 030344898  | 030361929  | 030348259  |
| B0BNE2 | Po1c2e    | DNA-directed RNA polymerases I, II, and III subunit RPB3C1       | 117.41  | 11.43 | 24570  | 2  | 48551.8739  | 36919.8767  | 35580.1903  | 40668.948   | 44744.7556 | 29660.7452 | 27696.7597  | 30741.5451  | 29423.0044 | 32837.452   | 25132.2681  | 25115.5176  | 30625.6043  | 2871.8202  | 30901.1429 | 27153.415  | 24313.0978 | 34496.0822 | 22450.8432 |
| O88828 | Po1f2f    | DNA-directed RNA polymerases I, II, and III subunit RPB3C2       | 49.86   | 5.51  | 14464  | 1  | 0.04731231  | 28754.6308  | 25711.2243  | 45323.1468  | 42260.7271 | 29925.1081 | 29955.6138  | 22160.5512  | 31198.7529 | 37708.2523  | 14883.8923  | 50047.1454  | 36955.7912  | 47926.9963 | 16905.2492 | 32783.5731 | 36474.9722 | 44755.599  | 45121.255  |
| P62488 | Po1f2g    | DNA-directed RNA polymerase II subunit RPB7                      | 50.97   | 11.05 | 19264  | 2  | 0.04731231  | 15838.2077  | 16058.8346  | 16203.6589  | 14759.0397 | 18813.3508 | 14073.0019  | 138959.9499 | 14199.5729 | 37708.2523  | 15291.4825  | 13989.9827  | 14321.778   | 14981.5399 | 13224.7985 | 15201.6399 | 11983.2842 | 16211.7634 | 15182.2059 |
| Q23G2C | Po1h2     | DNA-directed RNA polymerases I, II, and III subunit RPB3C3       | 240.11  | 28.67 | 17143  | 3  | 8848.9568   | 13883.3669  | 34588.1423  | 41935.3126  | 14716.733  | 10781.5374 | 19858.0851  | 12062.9853  | 26851.4668 | 15544.5717  | 8658.31087  | 26986.687   | 18593.109   | 21085.4663 | 21609.4328 | 26259.6648 | 23300.9572 | 19682.2869 | 23592.5269 |
| P60898 | Po1f2     | DNA-directed RNA polymerase II subunit RPB9                      | 38.02   | 5.6   | 14523  | 1  | 18903.4917  | 18382.0166  | 20866.2435  | 14395.347   | 15585.6167 | 030665024  | 030877705   | 15206.8359  | 12507.7619 | 19534.898   | 17024.3406  | 14002.0959  | 14301.8762  | 14414.6015 | 17803.3762 | 19100.9584 | 19150.3917 | 19125.8827 | 14715.0526 |
| Q921X6 | Po1f3     | DNA-directed RNA polymerase III subunit RPB6                     | 38.8    | 3.48  | 35632  | 1  | 1312.29434  | 03311494    | 030370204   | 030257718   | 030251027  | 6914.62946 | 3894.63999  | 4697.11788  | 4124.21088 | 6849.9958   | 035005071   | 030345808   | 030362706   | 4203.9678  | 030348812  | 5840.64216 | 030396139  | 6862.66535 | 030350028  |
| Q62086 | Po2b      | Serum paraoxonase/arylesterase 2                                 | 154.64  | 7.91  | 39627  | 3  | 0.04731231  | 28453.4614  | 55601.8131  | 28708.9997  | 24429.1433 | 51120.4917 | 34401.4428  | 49635.6241  | 48207.0219 | 25944.9095  | 34884.1423  | 36346.5229  | 33691.3106  | 48458.6133 | 39506.8915 | 30070.1713 | 33348.3595 | 32510.3655 | 44698.3018 |
| Q62087 | Po3       | Serum paraoxonase/lactonase 3                                    | 584.62  | 21.19 | 39351  | 8  | 83641.1764  | 51829.983   | 62564.2827  | 57060.6549  | 27754.6387 | 87271.3868 | 83465.2601  | 98464.3266  | 96630.0366 | 53650.9298  | 35546.7239  | 65290.7417  | 57590.0144  | 54095.0971 | 61289.507  | 52516.9395 | 54744.2292 | 45348.2826 | 51848.4555 |
| P37040 | Por       | NADPH-cytochrome P450 reductase                                  | 397.35  | 15.19 | 77044  | 7  | 153065.759  | 82949.5012  | 108676.1266 | 124451.8699 | 100302.182 | 130709.622 | 123128.176  | 103674.229  | 142198.748 | 90047.4     | 948845.6405 | 90031.1994  | 82274.1711  | 53991.0678 | 107563.65  | 109110.338 | 93256.4687 | 81530.9514 | 98342.9248 |
| Q9D819 | Ppa1      | Inorganic pyrophosphatase                                        | 241.96  | 17.3  | 32667  | 5  | 12135.5326  | 68703.0805  | 64581.1647  | 15326.7509  | 33800.4617 | 92140.279  | 113986.901  | 99075.2409  | 78446.3282 | 124867.254  | 90758.8096  | 92832.228   | 125331.153  | 97928.4152 | 118024.801 | 91604.139  | 99410.1873 | 108039.877 | 86495.3226 |
| Q91V49 | Ppa2      | Inorganic pyrophosphatase 2, mitochondrial                       | 78.7    | 8.18  | 38115  | 2  | 0.04731231  | 4141.2961   | 3140.00329  | 4192.7208   | 2417.44735 | 4100.94843 | 5205.7569   | 4883.90329  | 5723.37457 | 3175.56645  | 5250.91931  | 3147.81911  | 4090.26757  | 5535.0545  | 5515.40714 | 4550.41267 | 3513.10759 | 2757.06798 | 4500.11914 |
| Q91V18 | Ppa2      | Suppressor of SWI4 homolog                                       | 200.54  | 9.36  | 52756  | 4  | 76815.754   | 51634.5967  | 40615.9616  | 66551.7131  | 45443.0537 | 38666.0817 | 29980.7651  | 41713.1349  | 35826.2563 | 49221.255   | 37848.2492  | 41884.4031  | 4417.2971   | 39049.4645 | 2805.44293 | 31041.0024 | 42329.0566 | 54456.1558 | 32266.1308 |
| P35433 | Ppa1      | Amidophosphoryltransferase                                       | 92.92   | 3.29  | 57437  | 2  | 52048.9577  | 49431.433   | 31584.4342  | 18381.591   | 21266.6856 | 45542.8755 | 41383.2633  | 23174.7608  | 31351.4331 | 57377.9086  | 51100.3149  | 53802.1692  | 58907.9615  | 46297.844  | 54282.3559 | 59510.514  | 47328.4545 | 51685.0774 | 49886.4876 |
| P17742 | Ppia      | Peptidyl-prolyl cis-trans isomerase A                            | 1712.49 | 79.27 | 17971  | 24 | 4174405.76  | 42324003.35 | 3615821.54  | 127511.11   | 927022.992 | 4567923.93 | 5004022.66  | 428996.59   | 4195631.63 | 529807.82   | 390219.319  | 3475671.35  | 4328284.39  | 4784743.86 | 4844237.64 | 4075953.53 | 3573912.95 | 4458799.71 | 3098630.60 |
| P24369 | Ppib      | Peptidyl-prolyl cis-trans isomerase B                            | 682.61  | 51.39 | 23713  | 13 | 648387.761  | 790386.452  | 1383169.419 | 362943.341  | 337021.429 | 836042.209 | 918440.889  | 868068.309  | 79017.22   | 808273.591  | 693416.87   | 643145.401  | 72757.644   | 566179.644 | 770356.717 | 861170.362 | 565537.904 | 711824.17  | 705540.823 |
| P24369 | Ppid      | Peptidyl-prolyl cis-trans isomerase D                            | 365.23  | 17.3  | 40743  | 6  | 90779.889   | 140693.997  | 102929.989  | 46014.0935  | 62387.0484 | 131566.777 | 291960.786  | 163089.068  | 153817.737 | 272462.051  | 219628.392  | 194803.315  | 247333.41   | 232523.28  | 225228.335 | 260076.466 | 151166.127 | 209433.622 | 201364.504 |
| A2A802 | Ppig      | Peptidyl-prolyl cis-trans isomerase G                            | 81.28   | 1.6   | 88325  | 1  | 0.04731231  | 10678.0703  | 030370204   | 2031.0422   | 16228.4984 | 030665024  | 9487.69958  | 7287.3972   | 14233.9194 | 8141.4267   | 11844.0549  | 13877.7989  | 7902.91624  | 15011.4656 | 12349.6823 | 8181.22167 | 10355.3748 | 10243.4087 | 14260.0918 |
| Q9D868 | Ppjh      | Peptidyl-prolyl cis-trans isomerase H                            | 258.62  | 24.47 | 20464  | 5  | 0.04731231  | 37033.6135  | 15032.228   | 25484.6543  | 23817.0027 | 22263.3738 | 20550.379   | 40765.6787  | 20443.7635 | 41473.2193  | 31500.5566  | 35987.4322  | 40234.9223  | 40604.1532 | 35750.7617 | 40024.8462 | 32903.0917 | 24062.8838 | 26008.0864 |
| Q9D787 | Ppi2      | RibNucleoProtein E3 ubiquitin-protein ligase PPI2L2              | 38.53   | 0.37  | 59065  | 1  | 2917.05544  | 5911.18091  | 030370204   | 2031.0422   | 37036.888  | 2022.38384 | 28583.33002 | 030877705   | 030383783  | 8008.8969   | 2169.62471  | 2308.92304  | 2970.81422  | 2315.40828 | 030488812  | 030380805  | 2338.98532 | 2537.44763 | 030500218  |
| P20650 | Ppma1a    | Protein phosphatase 1A                                           | 62.49   | 3.14  | 42417  | 1  | 11468.5335  | 8154.2971   | 10250.5673  | 6472.19737  | 5252.33774 | 13267.5941 | 11628.0457  | 14809.6984  | 17708.518  | 12158.832   | 11968.2958  | 14106.5544  | 11304.6475  | 7239.63589 | 10124.8306 | 11029.7017 | 12587.3874 | 9561.48793 | 9577.93458 |
| Q61074 | Ppmlg     | Protein phosphatase 1G                                           | 272.87  | 11.25 | 58727  | 5  | 4023.9165   | 87852.2627  | 47565.4823  | 43558.7015  | 34041.4897 | 66612.37   | 59577.282   | 67855.1688  | 31816.4167 | 80983.3603  | 71501.2286  | 81490.1257  | 74100.7414  | 57631.6986 | 84113.2679 | 78941.7266 | 70562.6368 | 59568.7217 |            |
| Q8BVQ5 | Ppnm1     | Protein phosphatase methyltransferase 1                          | 86.93   | 5.44  | 42256  | 2  | 0.415.26799 | 3225.88899  | 030370204   | 030257718   | 030257718  | 5423.76364 | 4523.96732  | 030837823   | 5083.28205 | 2902.99016  | 2825.20414  | 3780.56302  | 3554.69765  | 2673.93389 | 1947.06286 | 4404.74856 | 030396139  | 4527.52343 | 2815.95506 |
| P51175 | Ppox      | Protoporphyrinogen oxidase                                       | 100.66  | 7.13  | 50871  | 2  | 0.04731231  | 6754.60418  | 109070.3787 | 14698.4221  | 9481.31091 | 10247.8699 | 10061.0468  | 13181.479   | 12527.386  | 2507.97357  | 10183.3021  | 9387.7612   | 8027.04678  | 14258.5783 | 10213.9145 | 8286.54578 | 7714.17697 | 10292.1746 | 9970.10409 |
| P62137 | Ppp1ca    | Serine/threonine-protein phosphatase PP1-alpha catalytic subunit | 1025.09 | 49.09 | 37540  | 16 | 415501.338  | 427671.829  | 3351570.211 | 279434.673  | 267658.427 | 46084.469  | 581556.173  | 518587.6    | 516685.925 | 509647.549  | 467954.182  | 463070.911  | 485060.111  | 512226.266 | 482638.626 | 494928.02  | 378404.476 | 428006.014 | 406425.168 |
| P62141 | Ppp1cb    | Serine/threonine-protein phosphatase PP1-beta catalytic subunit  | 844.12  | 39.45 | 37187  | 12 | 361597.777  | 265002.527  | 197996.401  | 149230.539  | 1505016.31 | 264293.65  | 354683.93   | 291735.112  | 325169.298 | 342315.462  | 315057.833  | 319399.031  | 314330.774  | 359830.162 | 285264.462 | 320461.501 | 259632.451 | 264882.914 | 322896.067 |
| P62141 | Ppp1cc    | Serine/threonine-protein phosphatase PP1-gamma catalytic subunit | 909.28  | 44.27 | 36984  | 13 | 45477.365   | 340328.696  | 267991.401  | 225315.005  | 220213.957 | 344939.819 | 455612.212  | 384669.059  | 394192.459 | 466855.261  | 392346.792  | 387536.977  | 395400.839  | 420690.187 | 360645.537 | 400574.067 | 325620.396 | 326848.535 | 397817.127 |
| Q9D8R7 | Ppp1r1a2b | Serine/threonine-protein phosphatase 1 regulatory subunit 12A    | 49.74   | 0.97  | 114967 | 1  | 0.04731231  | 10577.7934  | 10059.5368  | 7440.2512   | 8099.3384  | 18515.7155 | 14890.4003  | 14738.1337  | 10295.3226 | 20233.2163  | 165833.0903 | 13977.3331  | 13673.0149  | 15778.5105 | 15574.0307 | 15394.9617 | 11062.851  | 19963.1887 | 16277.1323 |
| Q62084 | Ppp1r1a2b | Protein phosphatase 1 regulatory subunit 12A                     | 43.38   | 17.01 | 115997 | 1  | 0.04731231  | 10618.9441  | 1195.1332   | 5195.62552  | 8870.9591  | 11825.4828 | 8770.78593  | 11159.5111  | 10168.6431 | 16567.35261 | 15161.307   | 51925.25433 | 17300.28741 | 13235.0938 | 13125.0976 | 13562.2925 | 14008.8282 |            |            |

|         |          |                                                            |         |       |        |    |            |            |             |            |            |            |             |            |            |            |            |            |            |            |            |             |            |            |            |
|---------|----------|------------------------------------------------------------|---------|-------|--------|----|------------|------------|-------------|------------|------------|------------|-------------|------------|------------|------------|------------|------------|------------|------------|------------|-------------|------------|------------|------------|
| A1A5S1  | Prip6    | Pre-mRNA-processing factor 6                               | 341.77  | 7.86  | 106764 | 7  | 21377.9129 | 15565.0564 | 20043.1794  | 18329.599  | 32497.0757 | 28561.3825 | 36568.5687  | 33884.2954 | 33615.82   | 25291.617  | 20626.5349 | 18625.4461 | 22967.586  | 17645.5908 | 17745.9636 | 59923.9122  | 12815.7256 | 22415.94   | 30934.2365 |
| Q9P9V0  | Prip8    | Pre-mRNA-processing-splicing factor 8                      | 690.62  | 8.52  | 273616 | 16 | 4531.29254 | 115984.953 | 10207.3917  | 233951.359 | 252250.57  | 47888.7013 | 65112.1104  | 53802.4975 | 234837.778 | 105248.653 | 25002.2847 | 86068.2716 | 102114.448 | 327883.2   | 197264.301 | 90867.4876  | 79272.6974 | 120786.695 | 62848.8754 |
| P60892  | Prip1    | Ribose-phosphate pyrophosphokinase 1                       | 692     | 38.99 | 34834  | 14 | 218967.362 | 206608.589 | 210616.78   | 113089.612 | 111491.205 | 298422.13  | 344011.86   | 272735.404 | 30763.029  | 28973.86   | 250357.994 | 303392.758 | 263349.708 | 27025.153  | 255670.542 | 258858.759  | 268068.658 | 240831.074 | 29139.319  |
| Q9CS42  | Prip2    | Ribose-phosphate pyrophosphokinase 2                       | 700.74  | 38.05 | 34786  | 13 | 19252.202  | 206608.589 | 210616.78   | 107002.898 | 100211.136 | 297446.061 | 296684.22   | 27152.577  | 237144.672 | 27152.577  | 237144.672 | 27152.577  | 237144.672 | 27152.577  | 237144.672 | 27152.577   | 237144.672 | 27152.577  | 237144.672 |
| Q63468  | Pripasp1 | Phosphoribosyl pyrophosphate synthase-associated protein 1 | 397.12  | 25.84 | 39436  | 7  | 9419.6652  | 66112.4581 | 57750.1881  | 32728.0657 | 38617.1127 | 78623.7635 | 74104.1693  | 62749.9076 | 80321.4613 | 96921.6723 | 86671.9672 | 92150.1741 | 80156.2609 | 100120.649 | 70486.1619 | 83251.6687  | 80142.9494 | 67242.2984 | 84811.519  |
| Q08618  | Pripasp2 | Phosphoribosyl pyrophosphate synthase-associated protein 2 | 179.36  | 11.92 | 40867  | 3  | 10273.9373 | 40286.9104 | 42615.5427  | 24046.6916 | 27200.3994 | 55686.4331 | 48390.9247  | 48236.9814 | 51409.5752 | 63221.7167 | 57656.5139 | 9394.6139  | 55864.4391 | 57305.7956 | 40351.1491 | 54567.7379  | 57688.2273 | 51333.9321 | 59201.3232 |
| Q3T114  | Prrc1    | Protein PRRC1                                              | 65.9    | 2.93  | 46295  | 1  | 0.04731231 | 6304.62926 | 6451.49265  | 20077.6816 | 24006.6916 | 10826.4935 | 8871.90192  | 7839.8201  | 8270.2667  | 7323.5715  | 5643.05498 | 7759.01812 | 8380.61487 | 6797.04005 | 9363.89363 | 9161.92218  | 12080.0138 | 8872.83489 | 8777.68616 |
| Q7T5C1  | Prrc2a   | Protein PRRC2A                                             | 65.12   | 0.97  | 229203 | 1  | 0.04731231 | 03311494   | 2469335124  | 025877818  | 0202510227 | 003660254  | 80833.63693 | 4220.49784 | 3481.3744  | 31426.876  | 5569.48069 | 3313.07024 | 3903.90813 | 2345.56496 | 3686.38022 | 3476.04051  | 3253.93737 | 2979.20852 | 3304.62891 |
| Q3T1H4  | Prrc2c   | Protein PRRC2C                                             | 378.57  | 3.34  | 310892 | 8  | 30674.6988 | 7534.0823  | 95276.331   | 8742.3433  | 17345.6122 | 102079.585 | 36937.0888  | 98484.1777 | 3381.5494  | 11374.3176 | 81276.379  | 5569.48069 | 3313.07024 | 3903.90813 | 2345.56496 | 3686.38022  | 3476.04051 | 3253.93737 | 2979.20852 |
| Q70455  | Prrc2i   | Exopoxygenphosphatase PRUNE1                               | 90.12   | 3.74  | 50239  | 1  | 0.04731231 | 918.560295 | 520.44372   | 2042.07984 | 4627.62386 | 1909.67027 | 1749.87874  | 1847.2654  | 2084.55909 | 1751.5955  | 1605.79454 | 1409.98571 | 1755.67232 | 2796.66352 | 1448.01217 | 1386.86172  | 1300.47409 | 1019.95989 | 1561.8088  |
| Q61207  | Psep     | Prosoplin                                                  | 146.14  | 5.57  | 61422  | 3  | 34117.9299 | 388554.432 | 4011960.211 | 258612.391 | 263572.355 | 60311.963  | 77275.879   | 75034.947  | 512182.101 | 413966.562 | 365322.527 | 356263.413 | 415094.76  | 250469.684 | 397392.638 | 512849.931  | 423059.954 | 3841.487   | 363558.451 |
| Q99K85  | Pseal    | Phosphoserine aminotransferase                             | 1514.64 | 20.27 | 40473  | 25 | 67927.629  | 72521.444  | 5900.620    | 211359.699 | 252463.295 | 814008.967 | 104712.68   | 832082.58  | 752545.25  | 109658.88  | 203231.053 | 63226.8103 | 987539.597 | 79842.815  | 881725.53  | 1022886.56  | 181090.902 | 885600.963 | 790557.442 |
| Q88777  | Psep2    | Protein Sefrin-2                                           | 110.03  | 3.35  | 50051  | 1  | 0.04731231 | 4972.8216  | 1051.96841  | 19454.2406 | 5663.65061 | 2412.28227 | 4649.72964  | 4977.0226  | 12208.6126 | 6367.07961 | 2172.4235  | 7878.44713 | 4953.60004 | 9180.88652 | 1601.74773 | 7019.3946   | 6729.7102  | 5676.83061 | 6634.91775 |
| Q99JF8  | Psep1    | PC4 and FRS1-interacting protein                           | 373.52  | 12.73 | 59697  | 7  | 98779.4257 | 96504.1666 | 100077.682  | 11619.636  | 96679.3438 | 70988.264  | 8025.2068   | 72692.6097 | 70095.2478 | 10274.7929 | 88865.136  | 74324.5161 | 68904.792  | 76584.9682 | 90194.7372 | 100159.7690 | 7491.9014  | 80714.2013 | 78077.4056 |
| Q9R1P4  | Psm1a    | Proteasome subunit alpha type-1                            | 707.76  | 64.64 | 29547  | 15 | 309645.725 | 572613.159 | 457135.201  | 263681.912 | 229652.109 | 468110.011 | 490655.627  | 438020.636 | 395414.713 | 843166.374 | 590440.653 | 568554.794 | 714917.102 | 549841.544 | 655735.418 | 617447.016  | 637941.614 | 694686.982 | 52406.443  |
| P17220  | Psm2a    | Proteasome subunit alpha type-2                            | 70.73   | 41.45 | 25927  | 10 | 254743.389 | 396635.59  | 316845.95   | 233513.077 | 18078.179  | 374720.858 | 336769.319  | 308989.173 | 341658.655 | 388578.673 | 478986.51  | 474823.203 | 451103.884 | 445754.874 | 435686.857 | 431102.207  | 429423.48  | 423111.56  | 355891.944 |
| Q70455  | Psm3a    | Proteasome subunit alpha type-3                            | 542.92  | 20.2  | 28405  | 9  | 451879.162 | 400558.827 | 376042.405  | 220636.621 | 305033.601 | 384877.142 | 362106.168  | 307693.51  | 323588.801 | 491796.823 | 457971.464 | 460513.107 | 468089.805 | 35158.768  | 380585.509 | 492324.511  | 494291.735 | 422933.322 | 306141.492 |
| P21670  | Psm4a    | Proteasome subunit alpha type-4                            | 704.89  | 65.13 | 29498  | 14 | 234899.02  | 293336.729 | 229763.169  | 147050.511 | 152726.416 | 243062.134 | 274745.987  | 235258.636 | 392772.506 | 448179.43  | 374061.001 | 341292.977 | 480934.474 | 312467.421 | 331725.516 | 390867.1    | 298659.649 | 337463.676 | 285099.907 |
| Q9Z2U1  | Psm5a    | Proteasome subunit alpha type-5                            | 578.55  | 47.22 | 26414  | 8  | 313457.592 | 2740.073   | 215918.884  | 154003.883 | 134949.101 | 234763.766 | 310346.888  | 262022.742 | 269278.595 | 395749.179 | 346066.973 | 317445.351 | 357501.083 | 301530.76  | 310452.483 | 362462.869  | 316584.459 | 300773.432 | 295210.917 |
| Q9QU10M | Psm6a    | Proteasome subunit alpha type-6                            | 783.67  | 64.63 | 27372  | 13 | 17046.513  | 589555.665 | 552833.141  | 329473.897 | 352137.682 | 55939.194  | 56114.606   | 443347.814 | 506666.754 | 752988.018 | 673012.463 | 630063.355 | 579697.657 | 602830.608 | 637738.659 | 671414.196  | 650959.948 | 712283.141 | 590766.92  |
| Q9Z2U10 | Psm7a    | Proteasome subunit alpha type-7                            | 682.84  | 23.23 | 27855  | 12 | 11521.436  | 412632.582 | 387840.297  | 288416.323 | 366289.681 | 401372.452 | 336703.252  | 366096.514 | 500666.514 | 500666.514 | 500666.514 | 500666.514 | 500666.514 | 500666.514 | 500666.514 | 500666.514  | 500666.514 | 500666.514 | 500666.514 |
| Q09061  | Psmb1    | Proteasome subunit beta type-1                             | 902.33  | 54.17 | 26272  | 13 | 32634.712  | 369824.512 | 324061.678  | 257609.107 | 259628.512 | 264049.295 | 368487.029  | 309216.474 | 289439.35  | 451367.087 | 49993.697  | 425398.865 | 465574.486 | 377002.314 | 358421.279 | 464930.98   | 397371.945 | 400350.618 | 389250.54  |
| Q53955  | Psmb10   | Proteasome subunit beta type-10                            | 329.37  | 28.57 | 29063  | 5  | 95262.7495 | 110550.868 | 121410.959  | 96040.166  | 7160.7309  | 81829.523  | 78615.1175  | 67239.396  | 66282.0165 | 108880.914 | 49989.8065 | 100907.087 | 98060.2807 | 87144.2479 | 94229.505  | 93675.4431  | 112633.334 | 99165.5903 | 84071.8092 |
| Q9R1P1  | Psmb3    | Proteasome subunit beta type-3                             | 809.18  | 51.71 | 22965  | 13 | 45077.82   | 358041.22  | 358041.22   | 242959.59  | 226360.75  | 42771.405  | 46764.735   | 52699.320  | 396107.76  | 462708.082 | 439977.236 | 30927.421  | 425018.588 | 384487.523 | 384453.471 | 427662.514  | 394176.314 | 384455.282 | 390891.743 |
| Q9R1P1  | Psmb3    | Proteasome subunit beta type-3                             | 809.18  | 51.71 | 22965  | 13 | 395609.301 | 298009.447 | 261347.059  | 146439.508 | 165140.995 | 292966.612 | 294968.756  | 238260.59  | 248792.395 | 419106.768 | 339688.598 | 302957.141 | 378245.201 | 333221.768 | 372842.668 | 418750.534  | 344825.425 | 249193.663 | 344127.27  |
| P99026  | Psmb4    | Proteasome subunit beta type-4                             | 528.56  | 40.28 | 29116  | 9  | 238840.70  | 166168.1   | 148958.465  | 81917.9848 | 106774.351 | 158931.074 | 180280.16   | 162982.985 | 178353.21  | 234611.99  | 233628.506 | 203526.747 | 21274.975  | 160732.145 | 179617.453 | 214785.4    | 223774.064 | 203681.065 | 201320.138 |
| Q55234  | Psmb5    | Proteasome subunit beta type-5                             | 97.81   | 8.71  | 28532  | 2  | 60571.4019 | 26208.928  | 195620.039  | 10831.7348 | 13377.8422 | 21453.8297 | 18472.5155  | 19451.825  | 23597.3219 | 37321.252  | 30073.713  | 33543.9518 | 36040.4462 | 25089.7902 | 26852.7993 | 29861.6583  | 29919.6113 | 29037.6703 | 29298.92   |
| Q60692  | Psmb6    | Proteasome subunit beta type-6                             | 244.81  | 43.28 | 25379  | 5  | 228672.719 | 252078.166 | 186509.265  | 142671.644 | 84418.6331 | 246638.809 | 186645.278  | 181651.009 | 183755.707 | 309973.753 | 219544.221 | 254291.847 | 270345.551 | 228572.896 | 287006.792 | 218307.726  | 272051.825 | 245637.132 | 157028.526 |
| P70195  | Psmb7    | Proteasome subunit beta type-7                             | 158.8   | 25.27 | 29891  | 4  | 70847.8436 | 158727.474 | 143603.784  | 68736.2336 | 90708.4066 | 143638.167 | 128674.088  | 103286.033 | 111684.548 | 222724.919 | 194207.055 | 209661.703 | 223454.063 | 171135.937 | 189689.723 | 190944.208  | 165818.038 | 182655.77  | 144071.402 |
| P20193  | Psmb8    | Proteasome subunit beta type-8                             | 602.14  | 42.39 | 30260  | 10 | 155441.139 | 21176.737  | 185175.79   | 112822.172 | 11740.999  | 181227.887 | 62764.76    | 16044.320  | 162582.41  | 285765.338 | 198306.784 | 232572.515 | 246382.31  | 200609.734 | 192340.593 | 218277.179  | 217094.811 | 220154.223 | 183871.201 |
| P61292  | Psmc1    | 26S proteasome regulatory subunit 4                        | 390.91  | 17.05 | 49185  | 7  | 124786.514 | 115431.271 | 127222.467  | 95914.655  | 98591.312  | 168411.317 | 187303.147  | 217523.449 | 164505.597 | 20921.803  | 196940.528 | 195104.23  | 207149.38  | 169802.039 | 179106.865 | 198514.473  | 18302.965  | 174871.117 | 153308.784 |
| Q84678  | Psmc2    | 26S proteasome regulatory subunit 7                        | 958.45  | 38.11 | 48648  | 16 | 10375.707  | 12601.46   | 100844.552  | 138704.022 | 118003.048 | 184470.864 | 170617.016  | 168473.726 | 186441.501 | 175188.122 | 201970.385 | 156174.787 | 20815.663  | 171809.072 | 185939.172 | 139414.826  | 171999.165 | 17182.123  |            |
| Q84678  | Psmc3    | 26S proteasome regulatory subunit 8                        | 957.78  | 43.89 | 49549  | 17 | 1317       |            |             |            |            |            |             |            |            |            |            |            |            |            |            |             |            |            |            |



|        |        |                                                           |        |       |         |    |             |            |             |            |            |            |            |            |            |            |            |            |            |            |            |            |            |            |            |            |
|--------|--------|-----------------------------------------------------------|--------|-------|---------|----|-------------|------------|-------------|------------|------------|------------|------------|------------|------------|------------|------------|------------|------------|------------|------------|------------|------------|------------|------------|------------|
| Q99L5  | Pwp1   | Periodic tyriophan protein 1 homolog                      | 41.33  | 3.19  | 55587   | 1  | 0.04731231  | 6000.8124  | 4220.71234  | 9041.1777  | 8966.71525 | 5736.04656 | 6009.8835  | 5362.4142  | 7472.1059  | 603094734  | 5755.46985 | 9331.00611 | 8081.87778 | 8759.59511 | 7392.74243 | 6828.20042 | 5900.37616 | 5345.4938  | 8477.8477  |            |
| Q8BL0  | Pwp2   | Periodic tyriophan protein 2 homolog                      | 165.36 | 3.39  | 102910  | 1  | 0.1276.0670 | 40592.3347 | 42025.6173  | 65056.426  | 41132.2917 | 27584.9147 | 22908.1852 | 25532.1749 | 24762.5516 | 45988.1314 | 33252.0561 | 38547.9176 | 56268.0574 | 30261.6423 | 42555.3197 | 41560.2753 | 33402.8166 | 46029.3657 | 33403.4587 |            |
| Q9EPB4 | Pycard | Apoptosis-associated speck-like protein containing a CARD | 168.67 | 25.39 | 21459   | 3  | 26140.7665  | 37360.0715 | 40285.0816  | 1213.5985  | 20478.1119 | 37617.7429 | 61428.896  | 59038.224  | 41010.5574 | 57385.573  | 72613.4305 | 33717.6099 | 60701.385  | 74123.1478 | 60780.9665 | 62309.733  | 45078.3172 | 54566.7037 | 65372.9264 |            |
| Q922Q4 | Pycr2  | Pyruvate-5-carboxylate reductase 2                        | 803.85 | 42.19 | 33659   | 1  | 471622.781  | 312442.923 | 284.182.374 | 2651.91    | 192384.601 | 348989.223 | 296620.509 | 26477.72   | 286647.607 | 2882.111   | 6792.27    | 21077.434  | 243290.624 | 242643.077 | 25374.008  | 294942.48  | 418148.615 | 318124.37  | 281153.671 | 372229.437 |
| Q922Q4 | Pycr1  | Pyruvate-5-carboxylate reductase 1                        | 191.4  | 17.52 | 38721   | 4  | 46864.533   | 10749.727  | 9700.67422  | 16346.036  | 14850.4108 | 2801.7043  | 52433.0095 | 7841.2691  | 46093.985  | 16388.259  | 122471.31  | 15450.2659 | 70484.9754 | 9004.4636  | 4611.9228  | 9398       | 1547.880   | 10228.847  | 9224.3166  |            |
| P3534  | Pygb   | Glycogen phosphorylase, brain form                        | 158.25 | 16.71 | 96174   | 10 | 46066.2759  | 1130647.24 | 10215.5565  | 46795.4485 | 26681.979  | 193779.720 | 17654.263  | 175968.305 | 184301.972 | 122162.109 | 14589.449  | 116966.609 | 108909.564 | 100921.265 | 112732.091 | 108436.705 | 108436.705 | 108436.705 |            |            |
| P09811 | Pylp   | Glycogen phosphorylase, liver form                        | 145.66 | 3.76  | 97483   | 3  | 32735.928   | 23087.547  | 2127.3301   | 13603.1623 | 6533.94167 | 58406.467  | 44191.2849 | 44798.173  | 47498.1481 | 15243.605  | 29844.2091 | 26501.7469 | 38288.3458 | 32543.5712 | 24017.3782 | 21826.1997 | 20245.3618 | 24157.1738 | 27128.7973 |            |
| Q61838 | Pzgr   | Pregnancy zone protein                                    | 37.27  | 0.6   | 165853  | 1  | 12928.255   | 12087.2419 | 11254.3301  | 19214.8848 | 12925.287  | 12490.2367 | 603877.705 | 13783.8325 | 10791.5985 | 13243.6165 | 1040.36783 | 9112.09733 | 12370.4299 | 14629.6376 | 2248.27436 | 14055.15   | 0.0396139  | 14868.467  | 12818.935  |            |
| Q8BML9 | Qars   | Glutamine-rRNA ligase                                     | 806.47 | 29.68 | 86777   | 18 | 8722.6156   | 121953.889 | 136204.916  | 99899.6125 | 103453.873 | 195077.406 | 245891.748 | 25646.2321 | 224425.122 | 203584.625 | 153644.141 | 202596.619 | 184754.985 | 178789.697 | 193687.484 | 167449.882 | 182784.914 | 184764.895 | 133450.121 |            |
| Q8BIV4 | Ojdr   | Dihydrodipieridine reductase                              | 199.9  | 26.56 | 25570   | 4  | 91922.50    | 64560.0324 | 15694.982   | 24734.1869 | 35420.789  | 70809.9836 | 87753.6725 | 86730.9105 | 65653.279  | 74878.461  | 79397.5788 | 58522.7489 | 69509.9961 | 55958.6515 | 61448.2751 | 71931.3597 | 73373.7924 | 73373.7924 |            |            |
| Q91X1U | Oki    | Protein quaking                                           | 278.1  | 23.17 | 37643   | 5  | 48778.424   | 48082.7208 | 56056.1994  | 36203.8791 | 45029.9457 | 72788.6229 | 62927.2219 | 67465.4607 | 73955.0422 | 75978.756  | 71805.0481 | 71590.4101 | 60382.8815 | 78828.7789 | 79557.9019 | 69137.3484 | 55469.644  | 37866.531  |            |            |
| P61027 | Rab10  | Ras-related protein Rab-10                                | 504.11 | 34    | 22541.8 | 4  | 25282.43    | 114466.357 | 195571.984  | 250882.018 | 164366.803 | 163288.476 | 132046.596 | 93108.7977 | 194422.117 | 90080.7626 | 96167.2738 | 163120.42  | 116688.576 | 133347.878 | 127427.211 | 94688.109  | 119109.108 | 87690.754  | 17373.008  |            |
| O35509 | Rab11  | Ras-related protein Rab-11                                | 35.25  | 16.71 | 96174   | 10 | 471622.781  | 312442.923 | 284.182.374 | 2651.91    | 192384.601 | 348989.223 | 296620.509 | 26477.72   | 286647.607 | 2882.111   | 6792.27    | 21077.434  | 243290.624 | 242643.077 | 25374.008  | 294942.48  | 418148.615 | 318124.37  | 281153.671 | 372229.437 |
| P09811 | Pzgr   | Glycogen phosphorylase, liver form                        | 145.66 | 3.76  | 97483   | 3  | 32735.928   | 23087.547  | 2127.3301   | 13603.1623 | 6533.94167 | 58406.467  | 44191.2849 | 44798.173  | 47498.1481 | 15243.605  | 29844.2091 | 26501.7469 | 38288.3458 | 32543.5712 | 24017.3782 | 21826.1997 | 20245.3618 | 24157.1738 | 27128.7973 |            |
| Q61838 | Pzgr   | Pregnancy zone protein                                    | 37.27  | 0.6   | 165853  | 1  | 12928.255   | 12087.2419 | 11254.3301  | 19214.8848 | 12925.287  | 12490.2367 | 603877.705 | 13783.8325 | 10791.5985 | 13243.6165 | 1040.36783 | 9112.09733 | 12370.4299 | 14629.6376 | 2248.27436 | 14055.15   | 0.0396139  | 14868.467  | 12818.935  |            |
| Q8BML9 | Qars   | Glutamine-rRNA ligase                                     | 806.47 | 29.68 | 86777   | 18 | 8722.6156   | 121953.889 | 136204.916  | 99899.6125 | 103453.873 | 195077.406 | 245891.748 | 25646.2321 | 224425.122 | 203584.625 | 153644.141 | 202596.619 | 184754.985 | 178789.697 | 193687.484 | 167449.882 | 182784.914 | 184764.895 | 133450.121 |            |
| Q8BIV4 | Ojdr   | Dihydrodipieridine reductase                              | 199.9  | 26.56 | 25570   | 4  | 91922.50    | 64560.0324 | 15694.982   | 24734.1869 | 35420.789  | 70809.9836 | 87753.6725 | 86730.9105 | 65653.279  | 74878.461  | 79397.5788 | 58522.7489 | 69509.9961 | 55958.6515 | 61448.2751 | 71931.3597 | 73373.7924 | 73373.7924 |            |            |
| Q91X1U | Oki    | Protein quaking                                           | 278.1  | 23.17 | 37643   | 5  | 48778.424   | 48082.7208 | 56056.1994  | 36203.8791 | 45029.9457 | 72788.6229 | 62927.2219 | 67465.4607 | 73955.0422 | 75978.756  | 71805.0481 | 71590.4101 | 60382.8815 | 78828.7789 | 79557.9019 | 69137.3484 | 55469.644  | 37866.531  |            |            |
| Q922Q4 | Pycr2  | Pyruvate-5-carboxylate reductase 2                        | 803.85 | 42.19 | 33659   | 1  | 471622.781  | 312442.923 | 284.182.374 | 2651.91    | 192384.601 | 348989.223 | 296620.509 | 26477.72   | 286647.607 | 2882.111   | 6792.27    | 21077.434  | 243290.624 | 242643.077 | 25374.008  | 294942.48  | 418148.615 | 318124.37  | 281153.671 | 372229.437 |
| Q922Q4 | Pycr1  | Pyruvate-5-carboxylate reductase 1                        | 191.4  | 17.52 | 38721   | 4  | 46864.533   | 10749.727  | 9700.67422  | 16346.036  | 14850.4108 | 2801.7043  | 52433.0095 | 7841.2691  | 46093.985  | 16388.259  | 122471.31  | 15450.2659 | 70484.9754 | 9004.4636  | 4611.9228  | 9398       | 1547.880   | 10228.847  | 9224.3166  |            |
| P3534  | Pygb   | Glycogen phosphorylase, brain form                        | 158.25 | 16.71 | 96174   | 10 | 46066.2759  | 1130647.24 | 10215.5565  | 46795.4485 | 26681.979  | 193779.720 | 17654.263  | 175968.305 | 184301.972 | 122162.109 | 14589.449  | 116966.609 | 108909.564 | 100921.265 | 112732.091 | 108436.705 | 108436.705 | 108436.705 |            |            |
| P09811 | Pzgr   | Glycogen phosphorylase, liver form                        | 145.66 | 3.76  | 97483   | 3  | 32735.928   | 23087.547  | 2127.3301   | 13603.1623 | 6533.94167 | 58406.467  | 44191.2849 | 44798.173  | 47498.1481 | 15243.605  | 29844.2091 | 26501.7469 | 38288.3458 | 32543.5712 | 24017.3782 | 21826.1997 | 20245.3618 | 24157.1738 | 27128.7973 |            |
| Q61838 | Pzgr   | Pregnancy zone protein                                    | 37.27  | 0.6   | 165853  | 1  | 12928.255   | 12087.2419 | 11254.3301  | 19214.8848 | 12925.287  | 12490.2367 | 603877.705 | 13783.8325 | 10791.5985 | 13243.6165 | 1040.36783 | 9112.09733 | 12370.4299 | 14629.6376 | 2248.27436 | 14055.15   | 0.0396139  | 14868.467  | 12818.935  |            |
| Q8BML9 | Qars   | Glutamine-rRNA ligase                                     | 806.47 | 29.68 | 86777   | 18 | 8722.6156   | 121953.889 | 136204.916  | 99899.6125 | 103453.873 | 195077.406 | 245891.748 | 25646.2321 | 224425.122 | 203584.625 | 153644.141 | 202596.619 | 184754.985 | 178789.697 | 193687.484 | 167449.882 | 182784.914 | 184764.895 | 133450.121 |            |
| Q8BIV4 | Ojdr   | Dihydrodipieridine reductase                              | 199.9  | 26.56 | 25570   | 4  | 91922.50    | 64560.0324 | 15694.982   | 24734.1869 | 35420.789  | 70809.9836 | 87753.6725 | 86730.9105 | 65653.279  | 74878.461  | 79397.5788 | 58522.7489 | 69509.9961 | 55958.6515 | 61448.2751 | 71931.3597 | 73373.7924 | 73373.7924 |            |            |
| Q91X1U | Oki    | Protein quaking                                           | 278.1  | 23.17 | 37643   | 5  | 48778.424   | 48082.7208 | 56056.1994  | 36203.8791 | 45029.9457 | 72788.6229 | 62927.2219 | 67465.4607 | 73955.0422 | 75978.756  | 71805.0481 | 71590.4101 | 60382.8815 | 78828.7789 | 79557.9019 | 69137.3484 | 55469.644  | 37866.531  |            |            |
| Q922Q4 | Pycr2  | Pyruvate-5-carboxylate reductase 2                        | 803.85 | 42.19 | 33659   | 1  | 471622.781  | 312442.923 | 284.182.374 | 2651.91    | 192384.601 | 348989.223 | 296620.509 | 26477.72   | 286647.607 | 2882.111   | 6792.27    | 21077.434  | 243290.624 | 242643.077 | 25374.008  | 294942.48  | 418148.615 | 318124.37  | 281153.671 | 372229.437 |
| Q922Q4 | Pycr1  | Pyruvate-5-carboxylate reductase 1                        | 191.4  | 17.52 | 38721   | 4  | 46864.533   | 10749.727  | 9700.67422  | 16346.036  | 14850.4108 | 2801.7043  | 52433.0095 | 7841.2691  | 46093.985  | 16388.259  | 122471.31  | 15450.2659 | 70484.9754 | 9004.4636  | 4611.9228  | 9398       | 1547.880   | 10228.847  | 9224.3166  |            |
| P3534  | Pygb   | Glycogen phosphorylase, brain form                        | 158.25 | 16.71 | 96174   | 10 | 46066.2759  | 1130647.24 | 10215.5565  | 46795.4485 | 26681.979  | 193779.720 | 17654.263  | 175968.305 | 184301.972 | 122162.109 | 14589.449  | 116966.609 | 108909.564 | 100921.265 | 112732.091 | 108436.705 | 108436.705 | 108436.705 |            |            |
| P09811 | Pzgr   | Glycogen phosphorylase, liver form                        | 145.66 | 3.76  | 97483   | 3  | 32735.928   | 23087.547  | 2127.3301   | 13603.1623 | 6533.94167 | 58406.467  | 44191.2849 | 44798.173  | 47498.1481 | 15243.605  | 29844.2091 | 26501.7469 | 38288.3458 | 32543.5712 | 24017.3782 | 21826.1997 | 20245.3618 | 24157.1738 | 27128.7973 |            |
| Q61838 | Pzgr   | Pregnancy zone protein                                    | 37.27  | 0.6   | 165853  | 1  | 12928.255   | 12087.2419 | 11254.3301  | 19214.8848 | 12925.287  | 12490.2367 | 603877.705 | 13783.8325 | 10791.5985 | 13243.6165 | 1040.36783 | 9112.09733 | 12370.4299 | 14629.6376 | 2248.27436 | 14055.15   | 0.0396139  | 14868.467  | 12818.935  |            |
| Q8BML9 | Qars   | Glutamine-rRNA ligase                                     | 806.47 | 29.68 | 86777   | 18 | 8722.6156   | 121953.889 | 136204.916  | 99899.6125 | 103453.873 | 195077.406 | 245891.748 | 25646.2321 | 224425.122 | 203584.625 | 153644.141 | 202596.619 | 184754.985 | 178789.697 | 193687.484 | 167449.882 | 182784.914 | 184764.895 | 133450.121 |            |
| Q8BIV4 | Ojdr   | Dihydrodipieridine reductase                              | 199.9  | 26.56 | 25570   | 4  | 91922.50    | 64560.0324 | 15694.982   | 24734.1869 | 35420.789  | 70809.9836 | 87753.6725 | 86730.9105 | 65653.279  | 74878.461  | 79397.5788 | 58522.7489 | 69509.9961 | 55958.6515 | 61448.2751 | 71931.3597 | 73373.7924 | 73373.7924 |            |            |
| Q91X1U | Oki    | Protein quaking                                           | 278.1  | 23.17 | 37643   | 5  | 48778.424   | 48082.7208 | 56056.1994  | 36203.8791 | 45029.9457 | 72788.6229 | 62927.2219 | 67465.4607 | 73955.0422 | 75978.756  | 71805.0481 | 71590.4101 | 60382.8815 | 78828.7789 | 79557.9019 | 69137.3484 | 55469.644  | 37866.531  |            |            |
| P61027 | Rab10  | Ras-related protein Rab-10                                | 504.11 | 34    | 22541.8 | 4  | 25282.43    | 114466.357 | 195571.984  | 250882.018 | 164366.803 | 163288.476 | 132046.596 | 93108.7977 | 194422.117 | 90080.7626 | 96167.2738 | 163120.42  | 116688.576 | 133347.878 | 127427.211 | 94688.109  | 119109.108 | 87690.754  | 17373.008  |            |
| O35509 | Rab11  | Ras-related protein Rab-11                                | 35.25  | 16.71 | 96174   | 10 | 471622.781  | 312442.923 | 284.182.374 | 2651.91    | 192384.601 | 348989.223 | 296620.509 | 26477.72   |            |            |            |            |            |            |            |            |            |            |            |            |

|        |        |                                                        |         |       |        |    |             |            |             |            |             |            |             |             |            |             |             |               |            |             |            |            |             |            |            |  |
|--------|--------|--------------------------------------------------------|---------|-------|--------|----|-------------|------------|-------------|------------|-------------|------------|-------------|-------------|------------|-------------|-------------|---------------|------------|-------------|------------|------------|-------------|------------|------------|--|
| P62878 | Rhb1   | E3 ubiquitin-protein ligase RBX1                       | 150.66  | 17.59 | 12274  | 1  | 24087.8364  | 11697.1303 | 15573.1357  | 28367.9837 | 17748.5365  | 13565.2924 | 15077.3191  | 13961.2509  | 11985.5632 | 14761.7165  | 21130.5362  | 25102.8126    | 15639.6605 | 20609.7846  | 11243.4956 | 12510.7839 | 13521.1313  | 13421.674  | 19766.695  |  |
| Q8V837 | Rec1   | Regulator of chromosome condensation                   | 719.9   | 32.54 | 44971  | 11 | 22430.775   | 192030.177 | 22003.1625  | 519729.258 | 200513.269  | 19910.582  | 191957.348  | 211997.527  | 91654.524  | 22818.376   | 261301.04   | 266686.355    | 254819.145 | 324739.378  | 235793.033 | 275848.693 | 270741.447  | 220098.021 |            |  |
| Q8BK67 | Rec2   | Protein RCC2                                           | 1429.69 | 59.62 | 55983  | 24 | 802693.968  | 117663.646 | 63170.786   | 49801.363  | 11367.105   | 698113.15  | 698021.888  | 629139.469  | 657358.114 | 9079529.254 | 83493.446   | 819053.921    | 837279.641 | 788994.804  | 719968.688 | 940591.63  | 786509.238  | 839243.027 | 755919.822 |  |
| Q9J710 | Rec3   | RNA 3'-terminal phosphate cyclase-like protein         | 40.41   | 2.14  | 40841  | 1  | 0.04731231  | 9709.6718  | 46070.267   | 4277.8018  | 5992.712    | 6389.71837 | 7524.29932  | 7170.46662  | 5768.6381  | 10664.031   | 8800.64618  | 8605.17428    | 9550.08089 | 9086.23602  | 12476.6227 | 11637.863  | 4733.37745  | 7480.64923 | 11545.4159 |  |
| QB8P92 | Rec2n  | Reticulocalbin-2                                       | 333     | 21.25 | 37271  | 5  | 67193.0797  | 59335.3354 | 75238.443   | 21695.3615 | 5359.80458  | 43798.8373 | 65774.8002  | 61959.5589  | 69758.072  | 55705.384   | 57943.261   | 66074.0639    | 59976.8284 | 58488.7123  | 58286.2020 | 62177.2879 | 60092.1247  | 45298.2319 | 69274.648  |  |
| QC8CF5 | Recor1 | REIS1 corepressor 1                                    | 45.34   | 3.33  | 52715  | 1  | 0.04731231  | 9071.73151 | 14203.0914  | 11005.3399 | 8390.8366   | 7976.93308 | 4920.7958   | 6037.27065  | 8888.7798  | 6711.5215   | 5308.47662  | 103620.670    | 6974.91472 | 88707.0932  | 7561.27094 | 5021.45713 | 9942.2141   | 7929.60853 |            |  |
| Q8UZA1 | Recs1  | Ca <sup>2+</sup> -interacting protein                  | 111.74  | 7.52  | 44114  | 1  | 0.04731231  | 7203.78683 | 3343.14224  | 6025877.18 | 9570.7701   | 20633.486  | 5395.0761   | 5263.8337   | 6037.27065 | 9501.8458   | 6035000.71  | 60354808.5261 | 56938.2561 | 50938.2561  | 50938.2561 | 50938.2561 | 50938.2561  | 50938.2561 | 50938.2561 |  |
| Q9QY1F | Rdh11  | Retinol dehydrogenase 11                               | 33.48   | 2.42  | 35148  | 6  | 7071.4186   | 52480.8989 | 55266.378   | 50719.7555 | 4888.3875   | 70821.4413 | 55583.9602  | 57445.1659  | 26097.456  | 41887.5326  | 53582.4427  | 49936.3965    | 44220.1102 | 59964.4383  | 57158.6389 | 63157.2825 | 51476.0314  | 45544.908  | 59879.7474 |  |
| P26043 | Rdx    | Radixin                                                | 1456.89 | 38.42 | 68543  | 26 | 2985.119    | 6260.9752  | 27108.142   | 2138625.73 | 1179918.27  | 3138265.65 | 3254784.23  | 2744847.49  | 2173902.25 | 3196196.56  |             |               | 2538390.5  | 2537753.98  | 2560795.25 | 2153457.69 | 2422831.4   | 2468035.41 |            |  |
| Q04207 | Relb   | N-transcription factor p65                             | 44.4    | 2.55  | 60212  | 1  | 3898.3772   | 7874.3321  | 7536.47528  | 6298.04472 | 5342.2055   | 10483.4039 | 10846.3176  | 9332.38808  | 9123.68279 | 11920.2854  | 9328.1785   | 9575.7422     | 12309.013  | 11404.6504  | 13018.7646 | 10186.8583 | 11891.7965  | 9969.3206  | 9256.34976 |  |
| PR2343 | Relp   | N-acetylglucosamine-2-epimerase                        | 125.93  | 11.4  | 49771  | 3  | 2533.6698   | 1559.7391  | 103070.0204 | 12731.1723 | 7213.908485 | 8453.55914 | 23844.1023  | 27777.407   | 24318.0245 | 22316.4629  | 21844.6218  | 7984.69276    | 18635.526  | 14513.6509  | 12771.8897 | 13892.2813 | 13377.9362  | 14159.9802 | 112927.71  |  |
| Q5F5M9 | Reteg1 | Retiologipin regulator 1                               | 64.63   | 2.29  | 52782  | 1  | 0.04731231  | 9077.86929 | 0307020.04  | 0258777.18 | 3775.3506   | 0306650.24 | 12541.318   | 9510.3127   | 649.420    | 10103.7106  | 8557.79199  | 7120.33338    | 8063.69149 | 7830.02273  | 717.066401 | 9890.51488 | 038913197   | 8872.97442 | 8009.56729 |  |
| Q64FW2 | Retrat | All- <i>trans</i> -retinol 13,14-reductase             | 35.42   | 1.97  | 67334  | 1  | 1.1555.8332 | 2967.73163 | 12427.8172  | 6763.10348 | 9821.83668  | 3966.5228  | 6056.79145  | 7391.10807  | 5449.2338  | 4604.55406  | 4214.22426  | 4700.56719    | 4762.63001 | 7450.38369  | 6106.73158 | 7220.96378 | 33061.01437 | 3102.92394 | 5442.55864 |  |
| Q8U1X1 | Rexo2  | Oligonucleotide, mitochondrial                         | 115.85  | 14.35 | 26752  | 2  | 0.04731231  | 2353.8975  | 2402.14488  | 983.155529 | 6822.69733  | 17810.9371 | 5138.90247  | 9518.31262  | 5291.16545 | 4421.08193  | 21041.79    | 6654.61208    | 3394.2971  | 5466.30329  | 2455.66157 | 3756.34548 | 5425.21711  | 3100.69366 | 12370.7509 |  |
| P35601 | Rfc1   | Replication factor C subunit 1                         | 78.45   | 1.06  | 125985 | 1  | 0.04731231  | 4182.59232 | 4127.8849   | 0258777.18 | 4532.00626  | 5061.12623 | 3904.1276   | 5165.04163  | 1037.7605  | 5614.91403  | 2598.7663   | 6278.93764    | 4474.89039 | 03052376    | 7425.62571 | 5780.21624 | 5386.20872  | 5155.35947 | 5830.59055 |  |
| Q9WU4K | Rfc2   | Replication factor C subunit 2                         | 65.54   | 4.87  | 38725  | 2  | 15869.5721  | 17528.4502 | 20760.1142  | 21887.3087 | 24037.5274  | 19403.3228 | 21028.2238  | 53397.4201  | 13740.7625 | 214682.254  | 59866.7502  | 55708.4265    | 57655.6829 | 48702.9347  | 54137.9802 | 67319.6393 | 58531.5268  | 24324.4597 | 22884.955  |  |
| QR8323 | Rfc3   | Replication factor C subunit 3                         | 205.16  | 11.24 | 40526  | 3  | 5539.80794  | 3847.98034 | 4741.7702   | 7245.23976 | 9303.49195  | 9909.04191 | 8979.09626  | 12479.0168  | 2698.5645  | 7563.97488  | 9176.36085  | 11303.8936    | 10072.3569 | 3723.30581  | 1995.64335 | 11293.641  | 9176.94863  | 6285.09304 | 9664.30018 |  |
| Q99J62 | Rfc4   | Replication factor C subunit 4                         | 76.66   | 7.14  | 39867  | 2  | 0.04731231  | 36122.3345 | 3046.1096   | 3026.1039  | 35703.4388  | 43256.6887 | 23052.8099  | 32286.8229  | 2607.3021  | 36268.7852  | 23946.8646  | 33488.528     | 38785.257  | 33908.4336  | 29851.7038 | 35991.1247 | 34510.688   | 34287.8079 | 50069.5254 |  |
| Q9D0F6 | Rfc5   | Replication factor C subunit 5                         | 160.65  | 10.62 | 38096  | 3  | 25916.79    | 46093.8535 | 38694.8965  | 59081.1    | 48173.0166  | 4794.8767  | 38743.6076  | 44325.1241  | 4025.8917  | 48979.1843  | 47263.1688  | 44922.6818    | 48266.9866 | 44850.9817  | 47344.2117 | 47964.8706 | 36750.5307  | 45156.3757 | 50237.6901 |  |
| QC8FV9 | Rfk    | Riboflavin kinase                                      | 59.68   | 13.55 | 61437  | 1  | 0.04731231  | 1396.70396 | 1530.07005  | 6025877.18 | 0251027.12  | 4778.8767  | 3743.6076   | 44325.1241  | 4025.8917  | 48979.1843  | 47263.1688  | 44922.6818    | 48266.9866 | 44850.9817  | 47344.2117 | 47964.8706 | 36750.5307  | 45156.3757 | 50237.6901 |  |
| Q6A0D4 | Rfln1  | Ratfin                                                 | 105.15  | 3.79  | 61537  | 1  | 6481.80559  | 2928.16736 | 9926.76172  | 5571.59627 | 11583.8017  | 10787.8866 | 11349.2655  | 10871.546   | 9750.30585 | 6455.18282  | 7030.51248  | 7172.07345    | 8240.86257 | 7293.07883  | 3188.86561 | 9172.70548 | 7555.82724  | 7122.72854 | 9227.59005 |  |
| QC6239 | Rho    | GTP-binding protein Rho                                | 119.81  | 23.37 | 20479  | 3  | 0.04731231  | 55093.7467 | 132009.7956 | 8423.7474  | 11767.3261  | 23541.5921 | 22754.4544  | 19271.2905  | 275.92185  | 12108.2344  | 4989.9236   | 16720.1927    | 14495.7949 | 15617.0461  | 16001.3307 | 16556.1734 | 12453.4043  | 12105.9136 | 14705.1004 |  |
| P61589 | RhoA   | Transforming protein RhoA                              | 645.94  | 44.25 | 21782  | 11 | 89074.457   | 15484.156  | 6393496.96  | 318040.012 | 376078.82   | 815367.371 | 802248.712  | 796438.561  | 697431.594 | 622693.879  | 706633.449  | 659815.165    | 593183.957 | 494176.489  | 596937.271 | 689640.24  | 764766.614  | 573844.753 | 65770.037  |  |
| Q62159 | RhoC   | Rho-related GTP-binding protein RhoC                   | 429.45  | 29.02 | 22006  | 8  | 875475.827  | 514033.815 | 625910.034  | 325311.338 | 1359.94422  | 835975.726 | 7840260.819 | 786030.079  | 679332.379 | 625885.437  | 716942.244  | 626830.429    | 584475.591 | 504129.192  | 613645.41  | 706541.582 | 733180.621  | 580599.927 | 64253.305  |  |
| Q60496 | RhoG   | Rho-related GTP-binding protein RhoG                   | 599.43  | 58.12 | 21309  | 9  | 68255.7616  | 110.95256  | 138233.63   | 135148.687 | 160734.852  | 161304.085 | 185708.815  | 160714.37   | 138461.65  | 158470.115  | 140845.285  | 146882.224    | 176466.676 | 144745.309  | 153506.03  | 102204.624 | 135153.852  | 142665.942 |            |  |
| QB8G51 | Rho1   | 2-minochohanol Rho GTPase 1                            | 17.28   | 5.71  | 72242  | 4  | 20927.6236  | 21668.9256 | 25925.348   | 32181.2841 | 28581.7334  | 20376.7639 | 17240.4938  | 168894.304  | 23566.261  | 24626.861   | 21857.8868  | 26293.1158    | 22057.3756 | 25914.024   | 25938.835  | 22494.0902 | 18862.8871  | 18795.1794 | 22238.387  |  |
| P52760 | Rhd    | 2-minochohanol Rho GTPase deaminase                    | 141.2   | 29.63 | 14255  | 6  | 0.04731231  | 4228.66842 | 3283.1832   | 0258777.18 | 3463.03387  | 5229.499   | 63584.088   | 34633.03387 | 5229.499   | 63584.088   | 34633.03387 | 5229.499      | 63584.088  | 34633.03387 | 5229.499   | 63584.088  | 34633.03387 | 5229.499   | 63584.088  |  |
| DZ3U57 | RhoX   | Ribosomal interacting 1                                | 36.43   | 2.01  | 67455  | 1  | 0.04731231  | 11668.2941 | 11925.302   | 26484.8869 | 21079.989   | 0306650.24 | 0387770.03  | 833873.984  | 96675.881  | 12056.4557  | 14503.5359  | 10636.5327    | 13593.9242 | 13649.6935  | 17638.205  | 13809.0101 | 8592.2586   | 10926.8837 | 11854.1252 |  |
| Q9QZL0 | Rpk3   | Receptor-interacting serine/threonine-protein kinase 3 | 73.14   | 5.76  | 53322  | 2  | 0.04731231  | 11667.2129 | 11925.302   | 26484.8869 | 21079.989   | 0306650.24 | 0387770.03  | 833873.984  | 96675.881  | 12056.4557  | 14503.5359  | 10636.5327    | 13593.9242 | 13649.6935  | 17638.205  | 13809.0101 | 8592.2586   | 10926.8837 | 11854.1252 |  |
| P13832 | Rlc-a  | Myosin regulatory light chain RLC-A                    | 199.63  | 29.07 | 19895  | 4  | 81900.1225  | 38959.543  | 371252.3282 | 0258777.18 | 20022.5072  | 62769.9342 | 117029.834  | 852527.3988 | 66984.8579 | 97346.0419  | 84543.5468  | 49510.6292    | 75415.0068 | 70292.463   | 86964.6552 | 109589.076 | 37763.2465  | 61553.8965 | 54761.7658 |  |
| QR8K30 | Rnasek | Ribonuclease kappa                                     | 60.3    | 9.18  | 10992  | 1  | 64560.4116  | 22267.5849 | 29684.3241  | 32911.6583 | 52720.8337  | 50181.1049 | 32591.9723  | 42413.0997  | 36765.430  | 17149.3231  | 19014.6029  | 27282.8170    | 19049.0889 | 19622.1624  | 21324.1579 | 30626.152  | 33294.2845  | 27200.2166 | 22984.4798 |  |
| Q4K1L4 | Rnf2   | E3 ubiquitin-protein ligase RNF2                       | 46.9    | 3.57  | 34242  | 1  | 0.04731231  | 6975.94329 | 5407.49097  | 8748.11838 | 4228.01966  | 6406.1385  | 7280.98126  | 4850.7801   | 6412.43085 | 4097.40221  | 7759.50383  | 60354808.0    | 8284.30356 | 8703.66759  | 64705.5495 | 70782.5421 | 3620.54028  | 5239.93302 | 8864.20772 |  |
| Q6A0D4 | Rnf1   | E3 ubiquitin-protein ligase RNF1                       | 60.48   | 4.37  | 60648  | 1  | 0.04731231  | 6311.1494  | 6032.9070   | 2659.4782  | 6285.01227  | 6355.56604 | 2706.9689   | 2654.8767   | 1916.514   | 6037.27065  | 933.08933   | 2839.86747    | 3379.73435 | 3666.99704  | 60488881.2 | 4097.19407 | 2197.81072  | 3722.50141 | 6031.12943 |  |
| Q9V177 | Rnf2   | Ribonuclease-inhibitor                                 | 2016.51 | 7.78  | 49816  | 24 | 345057.489  | 245250.885 | 198001.083  | 118003.341 | 143330.661  | 60416.730  | 739279.710  | 85478.538   | 442995.753 | 514033.246  | 438835.633  | 461760.21     | 402808.590 | 349705.485  | 485027.414 | 366882.519 | 336291.139  | 45526.12   |            |  |
| Q9D0L8 | Rnmt   | mRNA cap guanine-N7-methyltransferase                  | 26.53   | 14.84 | 52391  | 5  | 114770.024  | 13202.1341 | 24554.2708  | 14593.8127 | 14267.3521  | 22863.1275 | 36326.1729  | 31516.6173  | 38161.0226 | 41700.8425  | 40547.7572  | 41471.6623    | 35547.192  | 36288.9490  | 37651.3274 | 30231.3884 | 33373.5928  | 37344.901  | 3862.43026 |  |
| Q8VC73 | Rnpep  | Aminopeptidase B                                       | 1093.15 | 38.46 | 24616  | 17 | 307257.67   |            |             |            |             |            |             |             |            |             |             |               |            |             |            |            |             |            |            |  |

|        |        |                                                                          |         |       |        |    |            |              |             |            |            |            |             |            |            |            |             |            |            |            |             |            |            |            |            |
|--------|--------|--------------------------------------------------------------------------|---------|-------|--------|----|------------|--------------|-------------|------------|------------|------------|-------------|------------|------------|------------|-------------|------------|------------|------------|-------------|------------|------------|------------|------------|
| P51410 | Rpl9   | 60S ribosomal protein L9                                                 | 903.88  | 69.27 | 21881  | 14 | 1067279.09 | 778333.082   | 788534.973  | 589931.046 | 672892.029 | 885308.923 | 699435.311  | 736605.661 | 676070.143 | 894739.263 | 1264531.951 | 816073.457 | 803370.266 | 1021888.97 | 957004.126  | 1183348.46 | 870142.212 | 855477.18  | 815224.08  |
| P14869 | Rpl90  | 60S acidic ribosomal protein P0                                          | 866     | 47.32 | 143216 | 12 | 1396730.99 | 1003324.19   | 964868.844  | 741822.445 | 736425.423 | 1288835.54 | 1374442.44  | 1143571.83 | 1172540.28 | 1231613.24 | 1970572.14  | 1250245.08 | 1094966.48 | 1216679.94 | 1381922.2   | 1400377.37 | 1036918.98 | 1138732.08 | 1520419.46 |
| P47955 | Rpl91  | 60S acidic ribosomal protein P1                                          | 186.19  | 51.75 | 11475  | 2  | 190655.49  | 95988.683    | 115344.494  | 96451.1278 | 79304.3593 | 98691.811  | 105447.477  | 97861.294  | 84745.921  | 131605.97  | 1434004.04  | 28766.9086 | 110748.751 | 113744.648 | 137195.903  | 124351.955 | 133027.283 | 1116430.99 | 137894.677 |
| P99272 | Rpl92  | 60S acidic ribosomal protein P2                                          | 263.26  | 62.61 | 11693  | 3  | 79628.9265 | 41181.3145   | 600833.920  | 12986.2907 | 28781.7859 | 50348.9721 | 108842.3138 | 843463.694 | 85416.9126 | 102695.407 | 108295.113  | 78926.7841 | 90771.7819 | 119767.694 | 64040.618   | 111265.874 | 63396.2621 | 65707.8478 | 10707.2838 |
| Q91YQ5 | Rpn1   | Dolichyl-diphosphooligosaccharide--protein glycosyltransferase subunit 1 | 1542.48 | 52.96 | 68528  | 26 | 1021803.35 | 762337.067   | 809900.274  | 970124.505 | 941104.112 | 697573.512 | 653811.55   | 699516.329 | 739854.69  | 565926.599 | 590573.185  | 623753.306 | 612727.202 | 733547.072 | 684386.312  | 724885.927 | 681684.833 | 996562.243 | 771047.647 |
| Q9DBG6 | Rpn2   | Dolichyl-diphosphooligosaccharide--protein glycosyltransferase subunit 2 | 875.04  | 29.32 | 69063  | 13 | 612431.421 | 420109.747   | 465266.728  | 620384.337 | 521300.424 | 365149.895 | 279152.919  | 307020.216 | 400281.366 | 290665.306 | 270038.394  | 336651.882 | 266069.455 | 358169.79  | 402567.07   | 389172.601 | 348767.425 | 289331.408 | 362085.034 |
| Q99JH1 | Rpp25I | Ribonuclease P protein subunit p25-like protein                          | 38.46   | 55.2  | 17675  | 1  | 0.04731231 | 40652.83928  | 6270.52964  | 0.02587718 | 6827.6789  | 6705.12926 | 4658.31246  | 3638.78322 | 1722.43722 | 1884.42597 | 8857.25215  | 8757.88052 | 8109.073   | 6429.50943 | 9089.38236  | 8986.32941 | 5092.71594 | 6701.604   | 6685.63871 |
| O88U76 | Rpp30  | Ribonuclease P protein subunit p30                                       | 310.44  | 31.34 | 29473  | 7  | 0.04731231 | 40662.8411   | 35722.36868 | 59939.265  | 61535.6986 | 46202.4881 | 45150.168   | 45574.6133 | 63942.71   | 59108.792  | 44991.8454  | 53114.4553 | 50379.7871 | 56277.0164 | 65273.5537  | 43316.0961 | 35921.6478 | 38855.8268 | 47042.6691 |
| Q80U12 | Rpp38  | Ribonuclease P protein subunit p38                                       | 42.67   | 57    | 11129  | 7  | 0.04731231 | 2567.12902   | 0.03070204  | 0.02587718 | 2198.20941 | 2604.57378 | 3707.38627  | 2719.43955 | 2707.68219 | 2519.49355 | 2070.11382  | 2645.63414 | 2385.52919 | 0.03020376 | 2612.09851  | 2789.26754 | 1756.01602 | 2814.43576 | 2797.28385 |
| Q9CSU0 | Rpr1b1 | Regulation of nuclear pre-mRNA domain-containing protein 1B              | 189.71  | 16.56 | 36884  | 4  | 10390.7918 | 14484.277    | 13367.3488  | 5833.73251 | 12524.0873 | 11487.0384 | 23927.9184  | 21320.562  | 21499.7738 | 19524.3114 | 23113.0324  | 18268.5892 | 19937.9197 | 15006.2602 | 15616.4275  | 20799.8362 | 17880.486  | 16702.2368 | 18223.1102 |
| P63325 | Rps10  | 40S ribosomal protein S10                                                | 445.32  | 28.48 | 18616  | 4  | 36094.472  | 43388.501    | 317607.68   | 271108.094 | 311511.89  | 350048.899 | 324458.907  | 330059.635 | 414534.409 | 38591.07   | 332564.992  | 334067.897 | 316714.384 | 409667.578 | 357311.348  | 320999.524 | 349220.708 | 302025.487 | 322404.112 |
| P63281 | Rps11  | 40S ribosomal protein S11                                                | 568.63  | 56.96 | 18431  | 12 | 2526721.92 | 155881.561   | 1813274.92  | 1100882.63 | 1594496.52 | 1935616.42 | 1394788.62  | 1849001.74 | 1742201.63 | 1984604.1  | 1881298.13  | 183730.10  | 1790360.52 | 2137751.42 | 1967721.41  | 2070540.38 | 2120092.8  | 1905642.3  | 1760301.87 |
| P63228 | Rps12  | 40S ribosomal protein S12                                                | 632.64  | 62.88 | 14525  | 10 | 363321.95  | 300041.661   | 297925.96   | 145652.074 | 164366.125 | 309583.629 | 436977.212  | 436544.993 | 324631.840 | 49224.196  | 427528.025  | 372830.10  | 469000.415 | 462738.107 | 424168.679  | 495691.648 | 386064.399 | 404258.192 | 394081.87  |
| P62278 | Rps13  | 40S ribosomal protein S13                                                | 404.73  | 43.71 | 17222  | 8  | 127198.91  | 5624.085     | 38989.782   | 26512.122  | 269801.835 | 693154.227 | 837124.948  | 890567.69  | 781056.204 | 611699.847 | 642944.242  | 536301.7   | 606704.077 | 858006.004 | 702328.614  | 680861.555 | 611578.815 | 700106.015 | 57622.936  |
| P12471 | Rps14  | 40S ribosomal protein S14                                                | 532.69  | 39.74 | 16259  | 9  | 1405947.37 | 541249.093   | 986742.589  | 723121.316 | 760879.352 | 904672.269 | 728156.234  | 846379.311 | 768401.425 | 116545.58  | 1016380.08  | 1091752.93 | 1019910.3  | 1141685.93 | 990119.673  | 1196017.47 | 1114715.08 | 1094837.86 | 1056136.18 |
| P62843 | Rps15  | 40S ribosomal protein S15                                                | 323.18  | 39.31 | 17020  | 5  | 10723.800  | 26224.0654   | 45191.0818  | 5696.00367 | 7229.9897  | 31194.917  | 2802.1756   | 42848.3328 | 3658.5144  | 34665.0839 | 22954.4123  | 37322.0474 | 29453.572  | 22452.0934 | 2601.345    | 31896.0455 | 36179.9878 | 27035.1228 | 34048.0787 |
| P62245 | Rps15a | 40S ribosomal protein S15a                                               | 618.46  | 66.15 | 14840  | 12 | 1486057.72 | 964885.811   | 941801.83   | 640354.909 | 725902.702 | 2101808.27 | 976821.064  | 10251.772  | 93779.17   | 1127639.16 | 972725.744  | 1131556.96 | 1070363.15 | 1137780.99 | 1135993.77  | 1116351.5  | 100248.44  | 1147926.69 | 1001282.07 |
| P62245 | Rps16  | 40S ribosomal protein S16                                                | 682.93  | 71.92 | 16445  | 14 | 1964797.25 | 2243246.38   | 2304105.06  | 1720324.2  | 1719570.79 | 2435489.74 | 2026254.49  | 2117687.91 | 2000144.96 | 302380.52  | 2618430.79  | 291831.13  | 2425305.19 | 271144.03  | 2943519.6   | 3003399.94 | 2431905.2  | 2264137.96 | 259974.17  |
| P63276 | Rps17  | 40S ribosomal protein S17                                                | 410.24  | 51.85 | 15524  | 6  | 344488.76  | 625114.631   | 219143.948  | 177665.887 | 201138.83  | 274293.227 | 219065.51   | 345482.733 | 268893.831 | 263450.833 | 259464.256  | 23386.149  | 241690.459 | 296366.541 | 203760.441  | 291795.067 | 315829.056 | 265266.907 | 300326.556 |
| P62770 | Rps18  | 40S ribosomal protein S18                                                | 1765.78 | 18.55 | 17719  | 14 | 1507551.89 | 1076228.08   | 981978.517  | 571818.542 | 683550.202 | 123949.072 | 1174851.83  | 176619.781 | 142529.339 | 1129649.5  | 1197786.65  | 1119675.52 | 1182822.44 | 1102555.84 | 1148246.3   | 1555585.13 | 1136364.56 | 1354268.31 | 122167.59  |
| P17074 | Rps19  | 40S ribosomal protein S19                                                | 473.18  | 36.55 | 16085  | 8  | 1023600.18 | 669237.555   | 529787.118  | 253780.811 | 323732.957 | 752465.67  | 766754.369  | 847496.425 | 759786.588 | 837960.106 | 719791.639  | 591235.647 | 774953.417 | 78771.367  | 671627.935  | 743892.623 | 577881.171 | 703548.246 | 708294.374 |
| P62278 | Rps2   | 40S ribosomal protein S2                                                 | 884.65  | 60.88 | 33231  | 15 | 1472664.9  | 1818555.63   | 1968577.524 | 316779.286 | 486359.98  | 1447293.36 | 20675.206   | 147929.36  | 18931.75   | 813265.3   | 749252.146  | 178035.14  | 255497.913 | 3969720.36 | 2346713.63  | 2320596.97 | 2276160.58 | 2159390.1  | 2421471.60 |
| P60867 | Rps21  | 40S ribosomal protein S21                                                | 198.31  | 42.02 | 13373  | 4  | 763269.25  | 536171.134   | 588161.328  | 348363.861 | 461398.877 | 688480.369 | 671121.316  | 696390.192 | 573277.737 | 658841.102 | 669025.924  | 58047.354  | 717740.184 | 747992.973 | 5442626.681 | 784061.11  | 715515.815 | 636118.737 | 594900.797 |
| O90576 | Rps21  | 40S ribosomal protein S21                                                | 449.92  | 66.27 | 9127   | 8  | 218365.944 | 398362.841   | 394545.206  | 294389.795 | 32219.1296 | 322445.892 | 26945.905   | 298685.621 | 304125.691 | 550147.16  | 420003.435  | 488691.216 | 449301.549 | 400141.674 | 4674.3832   | 471260.642 | 549220.341 | 455333.24  | 410933.82  |
| P62267 | Rps22  | 40S ribosomal protein S22                                                | 323.59  | 35.66 | 15808  | 4  | 373799.801 | 623283.647   | 316624.929  | 23825.804  | 154161.826 | 33949.621  | 267845.169  | 289722.711 | 331870.152 | 302661.42  | 244833.323  | 452760.233 | 303503.186 | 393596.76  | 539661.448  | 332781.765 | 283639.162 | 360204.351 | 20892.329  |
| P62849 | Rps23  | 40S ribosomal protein S23                                                | 486.24  | 38.35 | 15423  | 10 | 762993.117 | 573796.88    | 624591.873  | 478454.511 | 457400.186 | 711168.111 | 484312.321  | 594102.818 | 654543.713 | 607953.567 | 728223.603  | 710327.325 | 561037.451 | 768339.819 | 721993.083  | 724982.823 | 715348.447 | 67917.887  | 778936.827 |
| P62852 | Rps24  | 40S ribosomal protein S24                                                | 299.9   | 29.6  | 13742  | 5  | 1319718.78 | 1066220.566  | 688217.072  | 44782.842  | 57379.137  | 1221279.49 | 116029.922  | 110434.1   | 1606387.62 | 1349650.36 | 1181196.99  | 1339115.36 | 1369294.73 | 1497914.6  | 1640376.58  | 911505.96  | 126328.587 | 1339419.5  |            |
| P62855 | Rps26  | 40S ribosomal protein S26                                                | 194.42  | 24.35 | 13015  | 3  | 609580.334 | 423172.764   | 431185.533  | 29081.1267 | 366594.135 | 434128.755 | 462528.347  | 479832.723 | 449461.259 | 578825.15  | 592135.07   | 547288.634 | 585374.297 | 568721.804 | 573261.257  | 656395.09  | 508971.069 | 545619.919 | 537159.925 |
| P24051 | Rps27  | 40S ribosomal protein S27a                                               | 789.07  | 58.97 | 13271  | 12 | 1473261.91 | 14022819.325 | 16255.574   | 5538.8765  | 1447.92542 | 2992.91043 | 2151.02865  | 3795.4263  | 3726.79953 | 15999.973  | 3969.72096  | 3723.10604 | 2656.88765 | 5348.57642 | 3804.5143   | 2413.74758 | 1980.3602  | 4211.27649 |            |
| O88U76 | Rps27  | 40S ribosomal protein S27b-like                                          | 205.85  | 26.19 | 9477   | 4  | 195346.516 | 26222.836    | 341938.926  | 205.9184   | 261555.287 | 395214.716 | 278887.489  | 31274.76   | 288924.24  | 307825.761 | 592601.917  | 315473.645 | 295513.323 | 290115.908 | 380781.321  | 322755.965 | 302410.47  | 278864.878 | 288008.075 |
| P62858 | Rps28  | 40S ribosomal protein S28                                                | 298.02  | 52.17 | 7841   | 5  | 408953.937 | 304430.7     | 338801.322  | 180551.413 | 191738.946 | 239175.722 | 25905.986   | 212881.698 | 23162.863  | 372599.373 | 359836.782  | 421127.124 | 368488.824 | 449218.969 | 459292.994  | 366921.832 | 330612.652 | 342107.264 | 384366.36  |
| P62274 | Rps29  | 40S ribosomal protein S29                                                | 90.7    | 46.63 | 6677   | 3  | 80778.6451 | 251839.058   | 225045.551  | 182974.255 | 150923.044 | 149533.431 | 148058.446  | 14589.265  | 146359.329 | 245782.131 | 264870.922  | 264272.942 | 189660.806 | 288644.659 | 268996.273  | 246065.18  | 160925.258 | 188027.559 |            |
| P62908 | Rps3   | 40S ribosomal protein S3                                                 | 1407.47 | 75.72 | 26674  | 25 | 1319533.4  | 337227.57    | 378610.95   | 2334989.25 | 2477266.15 | 4718920.56 | 4314266.06  | 4736519.44 | 4135917.18 | 4411581.2  | 4212942.95  | 4247680.98 | 4289001.61 | 4632654.71 | 483765.49   | 5193150.83 | 480361.91  | 4921620.74 | 4116505.77 |
| P49242 | Rps3a  | 40S ribosomal protein S3a                                                | 1048.57 | 54.55 | 29945  | 19 | 2445595.37 | 1590687.09   | 1497128.69  | 980332.018 | 1119057.22 | 171971.79  | 1807031.48  | 2099984.53 | 1660155.92 | 2188108.1  | 1917913.26  | 1851815.77 | 2078228.78 | 1850283.37 | 1899913.65  | 2367493.61 | 439393.17  | 2034207.79 | 1920119.31 |
| P62702 | Rps4x  | 40S ribosomal protein S4, X isoform                                      | 1362.98 | 65.78 | 29958  | 24 | 3422078.21 | 27647.423    | 3404928.87  | 1980299.21 | 2213229.42 | 332572.795 | 276455.453  | 349400.33  | 3061420.67 | 393786.535 | 3753007.59  | 3908654.09 | 560242.524 | 4015721.46 |             |            |            |            |            |

|        |         |                                                                                |        |       |        |    |            |            |             |            |             |            |            |             |             |            |             |            |            |            |            |            |            |            |            |
|--------|---------|--------------------------------------------------------------------------------|--------|-------|--------|----|------------|------------|-------------|------------|-------------|------------|------------|-------------|-------------|------------|-------------|------------|------------|------------|------------|------------|------------|------------|------------|
| Q9JLH  | Sart3   | Squamous cell carcinoma antigen recognized by T-cells                          | 3662   | 9.88  | 109619 | 7  | 5326.52266 | 46183.1184 | 375407.0741 | 53044.8624 | 32080.8581  | 62949.1905 | 56779.5273 | 69823.4477  | 63497.0005  | 66718.0    | 66330.1382  | 63224.205  | 65358.6739 | 60321.5694 | 42126.1216 | 71404.3156 | 59108.2463 | 66585.4901 | 71985.3372 |
| Q6ZPE2 | Scf1    | Wnt1/Wnt3a-related protein 5                                                   | 61.97  | 0.54  | 206963 | 1  | 4815.85207 | 1731.26304 | 1905.91575  | 407.84046  | 2784.02517  | 3641.34611 | 1935.31035 | 2360.54575  | 3796.28111  | 2513.18433 | 3193.48657  | 4175.35185 | 2397.5907  | 3299.04194 | 3289.90008 | 2564.21785 | 2411.67169 | 2201.50702 | 2725.93676 |
| Q63623 | Scar8   | Protein SCA8F8                                                                 | 74.72  | 0.95  | 139504 | 1  | 0.04731231 | 5934.08069 | 3804.58985  | 6788.05866 | 7344.34612  | 7091.10658 | 11233.5064 | 10497.07834 | 9349.08339  | 10712.794  | 11248.399   | 8282.62756 | 8099.215   | 11422.3834 | 10365.016  | 10918.7773 | 5200.7286  | 6634.6071  | 10997.9562 |
| P56603 | Scamp1  | Secretory carrier-associated membrane protein 1                                | 50.28  | 6.8   | 37999  | 0  | 0.03665024 | 6210.4235  | 6260.42055  | 7846.63386 | 6740.4396   | 7650.43856 | 4271.45107 | 5638.96701  | 5978.82741  | 4213.34163 | 6837.65393  | 6649.21112 | 5443.7792  | 3815.87269 | 0.03434898 | 2008.88063 |            |            |            |
| Q3690N | Scamp2  | Secretory carrier-associated membrane protein 2                                | 165.85 | 9.73  | 36465  | 2  | 0.04731231 | 13483.4005 | 12444.6807  | 19852.7936 | 13577.821   | 16160.0534 | 10826.3084 | 13177.4217  | 8294.33157  | 9601.92673 | 5038.86577  | 6852.49529 | 9028.04267 | 10958.272  | 12551.0534 | 11661.7655 | 10596.3913 | 9375.71799 | 6653.15546 |
| O35609 | Scamp3  | Secretory carrier-associated membrane protein 3                                | 243.98 | 14.9  | 384858 | 3  | 24783.2683 | 26592.4416 | 28637.4322  | 42024.3566 | 16694.0896  | 38172.2656 | 10591.0962 | 85258.8047  | 37423.2501  | 12739.6188 | 30883.4511  | 31449.6225 | 24697.9587 | 13544.042  | 11760.1636 | 28549.0705 | 24246.663  | 25755.9192 | 26106.3813 |
| Q8R1Z7 | Scap    | Sarcosine dehydrogenase-like oxidoreductase                                    | 189.76 | 13.75 | 47139  | 2  | 0.04731231 | 17080.7802 | 25513.1148  | 21931.7813 | 21650.8996  | 28283.2702 | 27732.6105 | 33153.3586  | 36857.63106 | 21854.7853 | 9284.9003   | 24584.972  | 23016.0971 | 21675.4919 | 30472.067  | 21892.3086 | 2121.1962  | 23014.4841 | 23494.4789 |
| P07308 | Scd1    | Acyl-CoA desaturase 1                                                          | 48.56  | 3.63  | 41467  | 1  | 254.847457 | 7298.83567 | 8286.2531   | 1273.88736 | 19274.6039  | 4215.4172  | 1569.61929 | 2098.81078  | 3056.01657  | 6013.73142 | 7440.1375   | 6660.76175 | 5631.61978 | 15259.6539 | 12476.4996 | 8009.1953  | 7592.37717 | 9811.37146 | 8221.86957 |
| Q8B8F7 | Scd1    | Scd1 family domain-containing protein 1                                        | 122.29 | 9.55  | 72323  | 1  | 0.04731231 | 8801.99241 | 28101.325   | 16284.2193 | 43149.2075  | 31499.2059 | 17297.4343 | 22491.8758  | 34988.0393  | 51687.2841 | 7240.19527  | 27151.6336 | 20577.3789 | 22100.1266 | 26406.3839 | 23261.662  | 14812.5767 | 12760.1527 | 20086.5132 |
| P0J126 | Scly    | Selenocysteine lyase                                                           | 153.62 | 15.97 | 47174  | 4  | 3728.52267 | 42714.65   | 34650.7131  | 19842.2948 | 26679.364   | 57795.4801 | 54531.5876 | 55273.612   | 54814.9502  | 41921.281  | 62313.9782  | 42488.4936 | 80077.5362 | 44164.5728 | 44634.3465 | 50748.383  | 47142.2612 | 51285.2166 | 45990.8866 |
| Q920A5 | Scp1    | Non-specific lipid-transfer protein                                            | 254.31 | 19.4  | 59126  | 5  | 6031.16099 | 113228.091 | 10601.7261  | 38815.7689 | 93794.6799  | 79704.7815 | 83797.7011 | 85882.1961  | 111442.209  | 105975.803 | 97833.5545  | 106213.559 | 112039.008 | 102656.993 | 122810.57  | 81450.5817 | 103939.206 | 99066.2725 |            |
| Q80U7A | Scpp1   | Retinoid-inducible serine carboxypeptidase                                     | 331.76 | 19.03 | 50965  | 7  | 35234.2942 | 9432.6411  | 98798.1846  | 32142.5071 | 46544.102   | 153862.823 | 202927.596 | 183291.677  | 166361.676  | 11840.8511 | 132322.165  | 126754.626 | 123994.364 | 132899.653 | 83191.4699 | 144995.818 | 111504.101 | 114767.027 | 128239.662 |
| Q80U7C | Scrb    | Protein scribble homolog                                                       | 44.34  | 0.81  | 174059 | 1  | 0.04731231 | 9425.05203 | 5544.48973  | 8342.87788 | 7133.68712  | 8636.15978 | 5491.27603 | 6617.97549  | 9183.5071   | 11835.5603 | 2119.4314   | 9222.0218  | 6779.1809  | 11426.0895 | 7793.4402  | 5140.42277 | 5708.85261 | 5275.52286 | 6617.38936 |
| Q9DBQ7 | Scyb3   | Protein associated with the carboxyl-terminal domain of ezrin                  | 38.24  | 1.5   | 81333  | 1  | 0.04731231 | 0.03111494 | 0.03070204  | 0.02587781 | 1855.86342  | 0.03665024 | 1235.50722 | 3288.3157   | 2342.4995   | 1667.06779 | 2779.68956  | 2316.26707 | 2322.40765 | 3786.63841 | 4887.04816 | 3066.74029 | 0.0396139  | 2927.5497  | 2737.24767 |
| O80992 | Sdcbp   | Syntenin-1                                                                     | 249.5  | 14.72 | 32379  | 3  | 25755.652  | 17858.2006 | 31768.8741  | 54365.9993 | 42389.3566  | 53309.3171 | 29520.7109 | 31509.7263  | 52880.9854  | 37643.7339 | 49775.8259  | 43111.9131 | 40284.9339 | 47948.3039 | 45506.5801 | 52285.945  | 49625.6028 | 46101.7748 | 64580.2539 |
| Q9ESP1 | Sdlt2   | Stromal cell-derived factor 2-like protein 1                                   | 201.93 | 24.89 | 22648  | 3  | 46981.4984 | 2741.9404  | 27582.2409  | 16925.527  | 13063.372   | 23410.8378 | 29028.4994 | 28105.6033  | 23746.8464  | 19522.3041 | 30607.2918  | 23883.1921 | 23355.6823 | 28844.3465 | 28703.4462 | 33768.3786 | 31406.2266 | 29533.0578 | 33254.5792 |
| Q8K2B3 | Sdha    | Succinate dehydrogenase [ubiquinone] flavoprotein subunit, mitochondrial       | 981.58 | 36.14 | 73683  | 17 | 26876.6252 | 41994.364  | 35322.5007  | 18265.523  | 2399776.032 | 233293.142 | 245659.260 | 274972.55   | 246939.366  | 237982.72  | 260727.258  | 246259.938 | 185826.256 | 263001.661 | 293575.359 | 310139.233 | 186570.037 | 220281.537 |            |
| Q9CQA3 | Sdhb    | Succinate dehydrogenase [ubiquinone] iron-sulfur subunit, mitochondrial        | 173.56 | 14.54 | 31814  | 4  | 24511.4266 | 65030.5059 | 64352.5535  | 49874.762  | 5314.4083   | 6213.76755 | 61772.0389 | 56323.0456  | 51535.649   | 66545.869  | 63587.9574  | 56233.7468 | 32045.3623 | 59682.5083 | 65235.3992 | 85904.025  | 46109.8774 | 60174.1194 | 57749.660  |
| Q9CZB0 | Sdhc    | Succinate dehydrogenase cytochrome b560 subunit, mitochondrial                 | 36.68  | 7.1   | 18382  | 1  | 0.04731231 | 4420.39217 | 4579.13958  | 3873.70094 | 4093.85279  | 4245.55219 | 4331.13059 | 5613.85643  | 4322.86831  | 2456.56383 | 4320.62971  | 3203.53652 | 0.03620746 | 3795.2131  | 4066.13499 | 3656.49367 | 3231.04214 | 3801.88143 | 5669.57842 |
| Q9CXV1 | Sdhd    | Succinate dehydrogenase [ubiquinone] cytochrome b small subunit, mitochondrial | 130.01 | 20.75 | 20194  | 2  | 0.04731231 | 10112.4765 | 165428.3236 | 26116.7206 | 25403.5475  | 14488.2839 | 12654.8669 | 15456.3227  | 13032.1693  | 10830.4516 | 11551.614   | 13840.7074 | 12826.5138 | 18984.3381 | 14138.7857 | 16951.6391 | 17326.579  | 15143.4564 | 15870.6234 |
| P42667 | Sec1a   | Signal peptidase complex catalytic subunit SEC11A                              | 154.03 | 11.17 | 70519  | 3  | 0.04731231 | 52757.3561 | 68307.4324  | 79289.2319 | 74246.3171  | 67773.5894 | 54485.443  | 55997.1756  | 68013.2104  | 40533.8662 | 34916.5709  | 41301.8003 | 38315.4471 | 52691.5986 | 84499.2075 | 39236.4332 | 29104.8246 | 43461.6175 | 33580.1042 |
| Q5XFW8 | Sec13   | Protein SEC13 homolog                                                          | 141.3  | 6.83  | 35548  | 2  | 6401.4471  | 39012.7184 | 36068.9898  | 17713.7139 | 54663.6698  | 4870.0011  | 61842.6229 | 61642.0822  | 5598.4026   | 57172.922  | 56977.2217  | 45495.0904 | 54010.2912 | 55786.7318 | 50725.0714 | 66037.848  | 44629.8953 | 50853.042  | 62412.2472 |
| O08547 | Sec22b  | Vesicle-trafficking protein SEC22b                                             | 539.67 | 43.72 | 24741  | 9  | 13460.429  | 133686.043 | 148354.961  | 147110.449 | 131814.055  | 173690.527 | 17294.9922 | 16400.555   | 18786.295   | 15019.449  | 155113.015  | 149741.983 | 193138.036 | 154865.349 | 138328.205 | 164348.343 | 146361.462 | 158762.404 |            |
| O01405 | Sec23a  | Protein transport protein Sec23A                                               | 220.37 | 8.89  | 86162  | 4  | 0.04731231 | 9293.0809  | 9281.75892  | 4555.8882  | 2242.88407  | 14459.6875 | 13342.2762 | 12330.5692  | 16682.0251  | 12347.3906 | 14450.4639  | 9879.59914 | 11941.1689 | 11523.5846 | 12630.1263 | 12536.2833 | 8550.31857 | 10400.7389 | 9381.8616  |
| Q9D462 | Sec23b  | Protein transport protein Sec23B                                               | 697.68 | 21.51 | 86437  | 11 | 10397.121  | 9796.966   | 110203.2319 | 59471.1853 | 66350.7094  | 149298.547 | 141454.152 | 156098.349  | 158116.42   | 140082.357 | 132250.246  | 142771.714 | 141162.893 | 142192.342 | 126979.509 | 130979.76  | 135433.619 | 136079.446 | 138266.105 |
| Q3UPL0 | Sec31a  | Protein transport protein Sec31A                                               | 252.36 | 5.37  | 133669 | 6  | 74615.934  | 40950.7827 | 19259.9443  | 19196.9323 | 21433.662   | 56547.6861 | 92198.1349 | 49089.3675  | 36859.878   | 51522.057  | 45463.2366  | 53231.8747 | 55047.6305 | 47473.8787 | 38939.2879 | 50952.6016 | 45750.6798 | 53477.8668 | 51283.1216 |
| P61620 | Sec31a  | Protein transport protein Sec31 subunit alpha isoform 1                        | 132.23 | 9.24  | 52265  | 2  | 19192.7958 | 11726.9143 | 20272.846   | 57557.4903 | 28331.0099  | 13571.6768 | 10290.4296 | 20731.5908  | 71298.4462  | 20313.3277 | 19087.7508  | 22066.0681 | 13587.5303 | 11824.2015 | 15298.7223 | 9670.9839  | 9670.9839  | 5660.4898  |            |
| Q9C8U8 | Sec6b1  | Protein transport protein Sec61 subunit beta                                   | 120.28 | 26.04 | 9958   | 2  | 7964.8538  | 92274.5022 | 116024.821  | 173497.229 | 157510.319  | 87694.2755 | 79401.1458 | 101041.012  | 96055.5496  | 74382.7893 | 83571.2288  | 101334.632 | 87270.1854 | 82147.2673 | 87287.9896 | 107424.875 | 101671.387 | 93944.141  | 119169.406 |
| Q8QB1A | Sec62   | Translocation protein SEC62                                                    | 65.85  | 0.53  | 45581  | 2  | 8427.4734  | 21242.4214 | 21232.1336  | 21866.8302 | 20549.327   | 20402.5589 | 20980.5644 | 22485.4032  | 25840.0712  | 23959.2583 | 24949.5865  | 19041.2963 | 21499.801  | 24578.3536 | 30597.6075 | 24995.8272 | 19077.2069 | 24983.2388 | 28185.0823 |
| Q8R2U0 | Seh1    | Nucleoporin SEH1                                                               | 131.44 | 8.06  | 39775  | 3  | 0.04731231 | 29234.4601 | 34163.6675  | 40422.6167 | 47706.2556  | 29818.93   | 18622.1815 | 15445.562   | 26980.9428  | 28568.6091 | 26208.0459  | 26210.1152 | 30948.007  | 27357.3008 | 28471.885  | 30087.2206 | 28727.7588 | 33245.478  | 30780.4306 |
| Q9Z2C6 | Sei1    | Protein sei-1 homolog 1                                                        | 136.7  | 4.68  | 88340  | 2  | 0.04731231 | 16329.9357 | 22202.2052  | 31073.1229 | 19232.9876  | 16370.1075 | 11920.7275 | 14616.9508  | 16460.9399  | 13459.7227 | 7493.08321  | 5901.78536 | 12370.0238 | 16237.9201 | 14039.7361 | 18891.0302 | 18171.202  | 8906.9376  | 9375.6821  |
| Q9Z3V8 | Selenof | Selenoprotein F                                                                | 61.85  | 7.41  | 17822  | 1  | 9520.6829  | 49222.5185 | 65059.5126  | 3529.67066 | 3988.77607  | 607.82596  | 6202.1803  | 4201.49411  | 8780.1823   | 5785.56046 | 63808.47419 | 5585.19663 | 567.99865  | 7241.73451 | 4759.351   | 7350.4204  | 7003.9225  | 3228.1733  | 30770.817  |
| Q64151 | Sema4c  | Semaphorin-4C                                                                  | 42.74  | 1.56  | 92557  | 1  | 0.04731231 | 0.03111494 | 0.0345.6293 | 8450.9879  |             |            |            |             |             |            |             |            |            |            |            |            |            |            |            |

|        |          |                                                                     |         |       |        |    |            |            |             |            |            |            |            |            |            |            |            |            |            |            |            |            |            |            |            |            |
|--------|----------|---------------------------------------------------------------------|---------|-------|--------|----|------------|------------|-------------|------------|------------|------------|------------|------------|------------|------------|------------|------------|------------|------------|------------|------------|------------|------------|------------|------------|
| QC80C  | Slam2    | SLAIN motif-containing protein 2                                    | 79.49   | 4.13  | 62378  | 2  | 0.04731231 | 0.03111494 | 0.03027833  | 4721.71671 | 4453.98916 | 8012.5835  | 5506.06269 | 6070.48429 | 5734.93914 | 5952.59724 | 5757.91427 | 5471.84905 | 5430.18807 | 0.03620746 | 6201.94847 | 0.03488812 | 5427.98218 | 6256.10896 | 7191.08988 | 4983.44868 |
| QG632  | Slc12a4  | Solute carrier family 12 member 4                                   | 42.9    | 1.38  | 120628 | 1  | 0.04731231 | 2704.61239 | 9295.87703  | 8320.03421 | 6747.88242 | 3389.76422 | 0.0877705  | 374.88203  | 1956.30412 | 561.88586  | 1985.20336 | 2745.27276 | 0.03620746 | 2857.15849 | 1668.68565 | 1510.11082 | 2541.44902 | 810.90516  | 1711.61629 |            |
| QG6H0  | Slc12a9  | Solute carrier family 12 member 9                                   | 60.46   | 2.41  | 96005  | 2  | 327.55664  | 11607.9191 | 13028.6694  | 19215.5123 | 14931.4421 | 11834.5526 | 2177.21693 | 8025.60179 | 11294.4572 | 1856.07542 | 8875.46335 | 10280.2433 | 2547.42869 | 12576.3322 | 9864.72798 | 8567.62908 | 6862.61062 | 7222.10873 | 8289.48773 |            |
| Q8BPX9 | Slc25a5  | Solute carrier family 15 member 3                                   | 360.59  | 14.36 | 64051  | 7  | 69510.4448 | 6667.9124  | 61886.9661  | 68007.4469 | 65639.8131 | 134180.913 | 111662.023 | 12013.29   | 124931.93  | 4956.2287  | 59925.6823 | 72075.255  | 59317.4217 | 63430.235  | 105645.047 | 110720.672 | 114421.291 | 73520.1074 | 85573.3065 |            |
| Q91W98 | Slc15a4  | Solute carrier family 15 member 4                                   | 45.03   | 2.44  | 62266  | 1  | 0.04731231 | 6068.12294 | 12439.9958  | 15700.348  | 9822.79048 | 7794.05243 | 7010.03203 | 10097.4054 | 8190.56975 | 4153.75222 | 8283.81108 | 7085.78568 | 5999.17875 | 8701.20717 | 5384.726   | 5181.3977  | 6879.83855 | 7068.79462 | 5792.31741 |            |
| P53986 | Slc16a1  | Monocarboxylate transporter 1                                       | 217.96  | 11.56 | 62267  | 3  | 0.04731231 | 29538.4721 | 30892.31    | 66999.5824 | 23712.2242 | 31079.8035 | 23834.4512 | 25444.5742 | 29310.1675 | 22212.5046 | 25633.6329 | 28073.3442 | 20151.6025 | 30962.2974 | 35580.242  | 26060.5928 | 31428.9977 | 23633.1629 | 25345.4951 |            |
| P51912 | Slc1a5   | Neutral amino acid transporter (B0)                                 | 288.25  | 11.93 | 58483  | 4  | 4019.494   | 39473.7796 | 43817.7692  | 7358.5044  | 64289.2294 | 34999.4775 | 40030.7973 | 36658.1733 | 44853.365  | 36183.887  | 40578.5666 | 36021.8198 | 40338.5165 | 37373.2152 | 50063.1346 | 56277.3246 | 50080.9401 | 38049.9138 | 45647.1803 |            |
| Q9EPF4 | Slc23a2  | Solute carrier family 23 member 2                                   | 113.21  | 2.47  | 70049  | 1  | 0.04731231 | 1961.47138 | 3184.93651  | 9119.11022 | 6488.45711 | 3080.11426 | 1093.6616  | 15289.633  | 3066.869   | 1412.9964  | 1924.8141  | 4138.85148 | 1594.06231 | 3272.6292  | 1768.95882 | 1985.89716 | 2991.82202 | 0.0343489  | 2549.25904 |            |
| P32089 | Slc25a1  | Tricarboxylate transporter protein, mitochondrial                   | 280.94  | 15.76 | 33835  | 6  | 16081.364  | 56142.5376 | 88111.9265  | 124258.051 | 102430.692 | 92837.2479 | 121633.94  | 116499.793 | 3363.861   | 46911.0896 | 110207.573 | 94819.8306 | 55242.413  | 95594.9218 | 111394.767 | 119316.648 | 90730.1914 | 71187.997  | 119357.598 |            |
| Q9QZD8 | Slc25a10 | Mitochondrial dicarboxylate carrier                                 | 647.92  | 39.37 | 31715  | 9  | 139730.547 | 97650.7523 | 125881.443  | 17522.71   | 171293.209 | 156338.805 | 110838.311 | 139265.358 | 148922.548 | 100752.438 | 121760.69  | 105208.861 | 87784.055  | 120800.177 | 137478.435 | 129668.322 | 108664.199 | 106544.834 | 131956.981 |            |
| Q9CKR2 | Slc28a11 | Mitochondrial 2-oxoglutarate/malate carrier protein                 | 891.98  | 55.15 | 34155  | 15 | 48956.145  | 294218.93  | 392137.1682 | 483371.41  | 417819.755 | 417824.426 | 355889.353 | 427431.122 | 472626.125 | 288285.342 | 315676.789 | 291759.158 | 259406.625 | 340790.884 | 358559.959 | 324458.802 | 255984.700 | 257003.554 | 300669.685 |            |
| Q8B159 | Slc25a12 | Calcium-binding mitochondrial carrier protein Anlar1                | 1065.94 | 32.94 | 74570  | 17 | 116427.185 | 105517.427 | 102973.47   | 16884.925  | 159155.772 | 142556.032 | 120496.454 | 144036.137 | 136855.366 | 85773.051  | 125747.218 | 112613.581 | 105529.12  | 138569.615 | 133617.184 | 137832.028 | 108903.193 | 106913.304 | 138881.935 |            |
| Q9QXX4 | Slc25a13 | Calcium-binding mitochondrial carrier protein Anlar2                | 1066.73 | 39.5  | 74467  | 20 | 147492.462 | 142086.813 | 147567.294  | 217432.841 | 191901.947 | 216231.153 | 206101.897 | 210491.789 | 217416.45  | 141558.734 | 168755.789 | 142749.304 | 112828.906 | 151964.418 | 197444.655 | 191510.843 | 141407.069 | 111307.286 | 183993.649 |            |
| P97521 | Slc25a20 | Mitochondrial carnitine/acylcarnitine carrier protein               | 38.2    | 2.66  | 33154  | 1  | 2403.95764 | 15224.6755 | 15265.8356  | 19615.6156 | 22545.701  | 10644.3728 | 11027.5786 | 8566.7004  | 8164.41069 | 9786.77449 | 5122.82362 | 9402.25591 | 8088.08763 | 7315.11598 | 8524.26279 | 8813.36227 | 9934.18092 | 7475.14301 |            |            |
| Q9D6M3 | Slc25a22 | Mitochondrial glutamate carrier 1                                   | 110.17  | 8.67  | 34670  | 2  | 4869.85941 | 7656.34405 | 10585.187   | 9681.69535 | 19217.9827 | 13380.0632 | 15197.3885 | 15250.5046 | 17492.7269 | 9368.93801 | 9458.27055 | 13424.1073 | 13510.9253 | 16284.6791 | 19844.1461 | 17273.2856 | 7483.15038 | 8707.17893 | 15229.2632 |            |
| Q8BMD8 | Slc25a23 | Calcium-binding mitochondrial carrier protein SCAM3                 | 110.17  | 27.37 | 32902  | 8  | 10431.373  | 8864.5213  | 105820.718  | 117387.308 | 98292.1996 | 163829.58  | 135024.781 | 160317.508 | 160635.189 | 81982.948  | 101949.601 | 74233.6237 | 97509.4475 | 82261.296  | 106220.332 | 110529.108 | 102637.341 | 85023.816  | 120097.629 |            |
| Q8VEM8 | Slc25a3  | Phosphate carrier protein, mitochondrial                            | 372.36  | 23.81 | 39632  | 7  | 333739.26  | 33878.0499 | 374574.326  | 522846.627 | 443350.646 | 510782.468 | 430550.768 | 498989.541 | 47714.614  | 272728.732 | 365372.025 | 344427.896 | 309160.132 | 377604.057 | 426110.691 | 384407.292 | 367932.855 | 332033.273 | 379994.74  |            |
| P48962 | Slc25a4  | ADP/ATP translocase 1                                               | 1241.76 | 60.07 | 32904  | 21 | 4343256.93 | 2855047.9  | 2876872.66  | 4303986.1  | 3371924.51 | 3175593.14 | 2884238.77 | 3207813.82 | 3451210.57 | 2609981.74 | 2380564.83 | 239890.6   | 2425019.44 | 2737997.66 | 3456962.24 | 3087036.72 | 2710993.37 | 2605589.66 | 2624628.8  |            |
| P51819 | Slc25a5  | ADP/ATP translocase 2                                               | 1922.33 | 78.19 | 32931  | 28 | 6219705.35 | 339049.452 | 370945.56   | 5618172.05 | 4559906.01 | 4012815.93 | 3798835.89 | 415214.66  | 4513097.68 | 8871253.65 | 3242252.11 | 3454506.74 | 302105.2   | 3415964.72 | 4522881.47 | 4199801.82 | 3504850.82 | 332075.61  | 355132.95  |            |
| Q8ZS21 | Slc25a51 | Solute carrier family 25 member 51                                  | 90.11   | 6.38  | 36889  | 1  | 0.04731231 | 0.03111494 | 2853.7593   | 483371.41  | 4273.89255 | 0.03665024 | 1597.66498 | 18879.9289 | 371.19989  | 474.89862  | 2396.94713 | 0.03545808 | 1046.04257 | 2440.85044 | 2479.81339 | 390.798199 | 2019.21661 | 1674.2511  | 2735.85012 |            |
| P11167 | Slc2a1   | Solute carrier family 2, facilitated glutamate transporter member 1 | 270.66  | 9.96  | 53963  | 4  | 59218.7605 | 81819.9198 | 70773.6425  | 134352.246 | 89475.3098 | 62246.0328 | 64753.6695 | 53593.648  | 69480.7889 | 43388.9533 | 49363.9444 | 55665.9566 | 45411.7702 | 59060.1929 | 87736.93   | 71525.0308 | 41383.556  | 50880.7273 | 62977.2284 |            |
| P97858 | Slc35b1  | Solute carrier family 35 member B1                                  | 41.14   | 3.11  | 33885  | 1  | 0.04731231 | 617.78875  | 3186.40528  | 4646.78756 | 3443.19291 | 4297.77328 | 0.03877705 | 2305.09441 | 4760.56329 | 3688.02789 | 5811.52922 | 5411.39919 | 3929.42994 | 5996.98669 | 7729.26786 | 5311.94981 | 2864.96113 | 2823.72493 | 3875.94989 |            |
| A2AKQ0 | Slc35d1  | UDP-glucuronic acid/UDP-N-acetylglucosamine transporter             | 48.8    | 5.92  | 39272  | 1  | 0.04731231 | 1910.64489 | 2362.56004  | 5197.30146 | 3972.41391 | 0.03665024 | 0.03877705 | 3084.89417 | 0.03727065 | 0.03794434 | 2805.02317 | 0.03545808 | 0.03620746 | 0.03502376 | 2603.54883 | 2510.18958 | 2230.66038 | 0.03434898 | 0.03500218 |            |
| Q9WU18 | Slc37a2  | Glucose-6-phosphate exchanger SLC37A2                               | 280.73  | 14.37 | 55073  | 5  | 5596.2488  | 52330.9452 | 55054.0389  | 9739.0118  | 82328.3294 | 105640.29  | 90483.577  | 87703.3771 | 94523.3877 | 43750.1159 | 68251.527  | 70386.2272 | 55984.7384 | 85163.1287 | 75259.7947 | 61150.8328 | 40379.0375 | 49348.741  | 49364.7004 |            |
| K13125 | Slc39a7  | Zinc transporter SLC39A7                                            | 118.22  | 8.19  | 50657  | 2  | 2036.1495  | 18394.8323 | 21185.4986  | 34198.0111 | 42668.9720 | 23272.648  | 19613.1752 | 22105.8478 | 20293.1229 | 20433.5170 | 19410.4585 | 27041.3767 | 16126.9644 | 26678.7746 | 23133.2108 | 24027.334  | 20033.7676 | 16089.2761 | 24641.6913 |            |
| P10852 | Slc4a2   | Ear1-cell surface anion-glycine heavy chain                         | 827.41  | 33.65 | 58337  | 14 | 6809.1568  | 800230.293 | 917788.579  | 155685.514 | 128296.782 | 953188.239 | 968228.38  | 95470.781  | 927497.66  | 61842.032  | 738489.517 | 732076.66  | 697234.603 | 789497.805 | 80655.895  | 788872.853 | 576857.582 | 691955.658 | 686246.45  |            |
| Q8BY12 | Slc4a7   | Sodium bicarbonate cotransporter 3                                  | 13.7    | 3.87  | 11614  | 3  | 0.04731231 | 1894.62425 | 0.03307004  | 1261.4343  | 0.02511027 | 172.166133 | 3203.39102 | 3690.4401  | 3603.99798 | 0.03794434 | 6778.87148 | 2324.30116 | 4411.07528 | 5844.5961  | 0.03488812 | 2624.21814 | 5809.69721 | 2403.84108 | 3437.37644 |            |
| Q9CKX4 | Slc50a1  | Sugar transporter SWEET1                                            | 49.52   | 9.05  | 26659  | 1  | 0.04731231 | 7196.26245 | 9523.23335  | 18224.8982 | 14475.9081 | 9165.03753 | 5618.63441 | 7722.49057 | 2192.9257  | 41905.5299 | 6209.96473 | 11624.0816 | 11669.7102 | 6031.47472 | 11675.614  | 10259.7018 | 9284.39677 | 9544.71548 | 7680.74322 | 9920.26233 |
| Q9Z127 | Slc7a5   | Large neutral amino acids transporter small subunit 1               | 148.07  | 10.16 | 55872  | 3  | 3510.684   | 35017.2289 | 46370.7241  | 82500.4091 | 58208.0852 | 50650.851  | 29798.6407 | 30691.5286 | 32085.8947 | 44357.2788 | 43335.8305 | 46428.0013 | 37529.0234 | 35614.9938 | 40292.4807 | 50652.3583 | 45167.4659 | 35348.274  | 29632.6433 |            |
| Q9QXX9 | Slc7a8   | Large neutral amino acids transporter small subunit 2               | 164.9   | 10.36 | 57873  | 3  | 17224.1665 | 88701.9621 | 101595.248  | 170796.92  | 157398.764 | 112216.903 | 80775.7190 | 93504.0081 | 100233.922 | 65629.9798 | 60976.4311 | 79083.8279 | 60031.8094 | 78523.4022 | 117266.028 | 65060.6611 | 80299.6473 | 62683.5401 | 50925.4472 |            |
| Q15498 | Slk      | STE20-like serine/threonine-protein kinase                          | 48.02   | 11.03 | 114157 | 9  | 24881.0402 | 53406.8456 | 56273.9619  | 21858.0384 | 29447.7962 | 46914.4752 | 4141.8519  | 57586.8168 | 56177.2857 | 55157.4558 | 53381.259  | 56974.1026 | 63074.5533 | 53761.5746 | 45078.0013 | 62757.6865 | 70074.612  | 5010.2586  | 46947.0956 |            |
| Q8CI25 | Slm      | SABF-like transcription modulator                                   | 190.57  | 4.17  | 116919 | 3  | 14840.7923 | 24093.3632 | 22688.8091  | 26838.4821 | 23409.4122 | 20733.5559 | 18034.2669 | 23305.9454 | 18694.4325 | 26103.237  | 19447.4135 | 17028.5206 | 16577.0728 | 14377.8944 | 22055.676  | 16025.5165 | 23961.7502 | 23579.1491 | 14321.0026 |            |
| Q54835 | Smad9    | Mothers against decapentaplegic homolog 9                           | 61.29   | 5.53  | 48992  | 2  | 437.404466 | 10633.3115 | 9509.8580   | 11396.9158 | 9260.8047  | 12278.4609 | 4299.38333 | 14055.8238 | 13336.5203 | 92083.2123 | 11439.4502 | 18135.3378 | 10222.8466 | 14764.6433 | 11630.2294 | 13423.1211 | 11157.9069 | 12122.4086 | 17268.652  |            |
| Q91V26 | Smap1    | Stromal membrane-associated protein 1                               | 106.19  | 5.68  | 47660  | 2  | 0.04731231 | 18992.4008 | 10372.5121  | 0.02587718 | 12163.2124 | 24735.7004 | 26830.4584 | 23354.5172 | 23906.992  | 26312.0707 | 20578.8308 | 20736.4472 | 21401.1221 | 22395.6046 | 25722.9125 | 20344.7081 | 10422.7957 | 21266.9623 | 15015.3714 |            |
| Q3TKT4 | Smarc4   | Transcription activator BRG1                                        | 356.79  | 6.39  | 481427 | 1  | 22261.2056 | 39809.9368 | 45255.5527  | 55259.3759 | 49751.9629 | 29284      |            |            |            |            |            |            |            |            |            |            |            |            |            |            |

|         |        |                                                          |         |       |        |    |            |             |            |            |            |            |            |            |            |             |            |            |            |            |            |             |            |             |             |             |
|---------|--------|----------------------------------------------------------|---------|-------|--------|----|------------|-------------|------------|------------|------------|------------|------------|------------|------------|-------------|------------|------------|------------|------------|------------|-------------|------------|-------------|-------------|-------------|
| Q9D8U8  | Snx5   | Sorting nexin-5                                          | 737.63  | 47.77 | 46679  | 15 | 46702.449  | 3602443.442 | 371550.544 | 224380.968 | 217335.534 | 533706.766 | 517486.012 | 527045.011 | 518337     | 431898.945  | 455534.578 | 437170.309 | 433228.006 | 439377.151 | 427255.301 | 419326.297  | 418517.188 | 409493.183  | 413122.298  |             |
| Q6P8X1  | Snx6   | Sorting nexin-6                                          | 1157.47 | 15.02 | 46679  | 1  | 1157.47    | 15.02       | 46679      | 1          | 1157.47    | 15.02      | 46679      | 1          | 1157.47    | 15.02       | 46679      | 1          | 1157.47    | 15.02      | 46679      | 1           | 1157.47    | 15.02       | 46679       | 1           |
| Q61263  | Sod1   | Sterol O-acetyltransferase                               | 126.26  | 5.56  | 63799  | 3  | 42037.121  | 29676.075   | 34710.0025 | 6111.4201  | 48655.1057 | 13962.8512 | 11647.6051 | 10184.1799 | 1015.76    | 15476.1078  | 17481.1748 | 19482.0854 | 27425.5916 | 16446.0097 | 24358.0212 | 30380.8694  | 28248.5107 | 30167.4298  | 26011.3768  | 158373.5553 |
| P08228  | Sod1   | Sterol acyltransferase [Cu-Zn]                           | 335.23  | 32.47 | 15943  | 5  | 42037.121  | 29676.075   | 33551.516  | 20925.945  | 285239.856 | 246623.548 | 229648.505 | 251161.683 | 206414.62  | 46571.953   | 326108.086 | 316589.794 | 361213.645 | 481823.887 | 354455.407 | 4185637.317 | 406780.676 | 3476179.134 | 319169.548  |             |
| P09671  | Sod2   | Superoxide dismutase [Mn], mitochondrial                 | 231.86  | 16.67 | 24603  | 4  | 151503.497 | 164895.95   | 97137.0893 | 62314.7644 | 51549.024  | 163701.084 | 213700.066 | 202442.07  | 162557.647 | 163461.861  | 149027.868 | 150765.764 | 163996.868 | 183398.44  | 109876.066 | 197048.731  | 147433.585 | 138502.552  | 142460.623  |             |
| Q9C407  | Son    | Sortilin SON                                             | 147.79  | 13.35 | 265631 | 3  | 25908.0817 | 18611.5206  | 14713.9401 | 17689.572  | 28373.1178 | 3987.45664 | 8273.47081 | 23698.2445 | 24039.3768 | 19326.1801  | 18161.8405 | 19744.6161 | 8583.64821 | 18173.4352 | 10978.2762 | 4910.53704  | 3800.78263 | 3963.46248  | 26401.2374  |             |
| Q64442  | Sord   | Sorbitol dehydrogenase                                   | 179.28  | 14.01 | 28249  | 1  | 31892.3602 | 28946.4116  | 21933.0646 | 12893.3213 | 12706.5212 | 29871.049  | 35464.4358 | 27032.3176 | 29919.7904 | 32333.1189  | 26345.754  | 33067.2386 | 28638.1948 | 24424.5488 | 26780.5024 | 22086.3062  | 26793.7734 | 25345.6633  | 24130.2369  |             |
| Q80990  | Sp1    | Transcription factor Sp1                                 | 45.52   | 3.57  | 80732  | 1  | 0.04731231 | 59287.76493 | 12076.3445 | 31078.4386 | 5320.92321 | 6823.44313 | 6240.65863 | 03837823   | 7025.4401  | 003794434   | 9416.89381 | 7362.29238 | 5787.43479 | 6483.3115  | 5933.88372 | 5570.69143  | 7395.75598 | 03434898    | 6257.76382  |             |
| Q8BVK9  | Sp110  | Sp110 nuclear body protein                               | 271.56  | 14.83 | 80732  | 1  | 0.04731231 | 59287.76493 | 12076.3445 | 31078.4386 | 5320.92321 | 6823.44313 | 6240.65863 | 03837823   | 7025.4401  | 003794434   | 9416.89381 | 7362.29238 | 5787.43479 | 6483.3115  | 5933.88372 | 5570.69143  | 7395.75598 | 03434898    | 6257.76382  |             |
| Q3UM65  | Spa29  | S/P- amino-terminal kinase-interacting protein           | 117.93  | 2.8   | 146219 | 3  | 0.16132673 | 1041.8946   | 6198.9876  | 2702.55555 | 5762.201   | 17920.8981 | 14787.6693 | 2189.4985  | 1885       | 16020.123   | 15945.0325 | 16815.987  | 15461.5629 | 16810.2642 | 5779.74747 | 18320.545   | 11894.8658 | 12566.7514  | 7680.71886  |             |
| Q3SAC0  | Spa25  | C-Jun family protein 2 homolog                           | 152.16  | 4.93  | 92756  | 3  | 10661.1929 | 1490.8025   | 1938.2405  | 6138.28778 | 0.02510227 | 8927.8121  | 0.03877705 | 1171.2626  | 2080.1884  | 6734.9327   | 5464.15375 | 6487.26272 | 869.011137 | 7299.68799 | 0.03488812 | 5854.77644  | 0.03396139 | 1365.70542  | 8818.78077  |             |
| Q9D958  | Spes1  | Signal peptidase complex subunit 1                       | 37.57   | 8.07  | 18186  | 1  | 0.04731231 | 7854.7284   | 15355.821  | 25597.304  | 20928.4403 | 13116.1804 | 1030.2354  | 11398.8178 | 16858.8742 | 11623.5963  | 7715.54542 | 6368.8241  | 7412.75989 | 14493.9753 | 19669.5471 | 9228.01751  | 7416.62002 | 11323.3268  | 9345.55947  |             |
| Q9C9Y2  | Spes2  | Signal peptidase complex subunit 2                       | 121.17  | 10.62 | 24978  | 1  | 22622.7027 | 10350.3555  | 84856.4934 | 95884.1911 | 103993.348 | 69030.4268 | 51039.2569 | 44947.6692 | 64533.2523 | 52329.8583  | 63622.672  | 55444.5186 | 61523.8739 | 60821.5632 | 83308.8674 | 73819.9297  | 69811.7913 | 55114.684   | 6442.72     |             |
| Q9ZWQ7  | Spes3  | Signal peptidase complex subunit 3                       | 124.37  | 17.78 | 20313  | 3  | 0.04731231 | 68538.3891  | 86566.9826 | 127864.94  | 10771.135  | 80861.4529 | 76366.6284 | 84711.4484 | 80992.5101 | 62635.3199  | 68726.8214 | 64683.6019 | 60448.4668 | 69116.956  | 80064.2207 | 79796.6878  | 63367.1615 | 70595.6179  | 75408.0343  |             |
| Q62407  | Spep   | Striated muscle-specific serine/threonine-protein kinase | 37.63   | 4.03  | 354473 | 1  | 0.04731231 | 033111494   | 03070204   | 02587718   | 0.02510227 | 4796.82213 | 3346.39703 | 4256.8309  | 4188.9086  | 208579934   | 2141.42735 | 2405.99568 | 2825.22012 | 1598.05731 | 0.03488812 | 0.03396139  | 0.03344898 | 1966.32436  |             |             |
| Q9J1A7  | Sphk2  | Sphingosine kinase 2                                     | 107.56  | 4.05  | 65612  | 2  | 13936.685  | 5486.49673  | 6999.42271 | 1017.3676  | 8131.37521 | 23731.1174 | 7834.11285 | 8423.07227 | 12061.308  | 9644.84608  | 15964.9366 | 12588.6373 | 5722.39243 | 13407.1691 | 15017.2763 | 13608.3421  | 9670.38739 | 6175.28356  | 14182.5897  |             |
| P17433  | Sp1    | Transcription factor PU.1                                | 59.48   | 4.41  | 31349  | 1  | 1830.34503 | 10656.3658  | 03070204   | 12178.3712 | 11517.8291 | 6130.50444 | 0.03877705 | 3714.66601 | 6340.65722 | 11894.3371  | 8403.8943  | 10359.1464 | 6371.74684 | 0.03502376 | 11121.772  | 13148.8919  | 9096.52599 | 10190.8451  | 10060.9887  |             |
| Q9Y2DU8 | Spns1  | Protein spintin homolog 1                                | 40.9    | 4.17  | 56796  | 1  | 0.04731231 | 12307.17491 | 1847.98794 | 4125.83972 | 2434.7662  | 2238.13006 | 03877705   | 03837823   | 2634.29177 | 7967.44809  | 1343.05553 | 9125.53442 | 1085.38928 | 2288.59964 | 1841.45809 | 1515.77604  | 1965.30315 | 1505.88894  | 6611.872696 |             |
| Q64105  | Spr    | Serpinin reductase                                       | 763.56  | 59.39 | 27883  | 2  | 70992.6828 | 13565.405   | 12837.857  | 60743.9224 | 88948.1243 | 159740.073 | 19047.089  | 18205.275  | 124243.183 | 21624.312   | 208215.709 | 193572.293 | 241318.052 | 165971.875 | 175167.35  | 212768.581  | 161836.627 | 190251.991  | 169836.446  |             |
| Q4EZT8  | Spry4d | SPRY domain-containing protein 4                         | 41.51   | 4.83  | 32520  | 1  | 3991.16421 | 14169.9479  | 29252.3707 | 3980.5324  | 3288.8743  | 8902.85928 | 1936.8568  | 8737.88797 | 13294.727  | 7603.18258  | 7924.90632 | 910.65057  | 7656.71962 | 6811.63489 | 11332.1038 | 13249.1052  | 033961319  | 9062.74517  | 12136.662   |             |
| P16546  | Sptan1 | Spectrin alpha chain, non-erythrocytic 1                 | 138.22  | 17.8  | 284597 | 4  | 0.04731231 | 16599.4046  | 20279.5804 | 10791.9494 | 15783.5606 | 17036.9356 | 20871.1668 | 23595.8227 | 23311.484  | 21665.994   | 23995.2565 | 22023.9699 | 20600.8647 | 21409.2587 | 20923.5192 | 15955.1561  | 19831.1857 | 16700.3486  | 2070.3433   |             |
| Q62261  | Sptn1  | Spectrin alpha chain, non-erythrocytic 1                 | 49.45   | 0.38  | 274223 | 1  | 0.04731231 | 11218.4319  | 03070204   | 7790.9386  | 7255.5287  | 33022.9988 | 2767.6368  | 4134.5912  | 25911.112  | 18894.484   | 2061.1361  | 12418.5793 | 2021.6731  | 9637.10292 | 19845.0989 | 20382.3266  | 17638.4262 | 11282.6296  | 11839.6374  |             |
| O35704  | Sptlc1 | Serine palmitoyltransferase 1                            | 41.91   | 3.81  | 62535  | 1  | 0.04731231 | 643.83905   | 03070204   | 0.02587718 | 2393.24127 | 1646.74661 | 943.59639  | 1300.6646  | 1945.92425 | 1879.713433 | 171.5916   | 1322.19629 | 3973.32757 | 2146.46055 | 1234.39917 | 880.110747  | 1009.5610  | 845.47767   | 1922.70272  |             |
| P97363  | Sptlc2 | Serine palmitoyltransferase 2                            | 67.14   | 3.21  | 62535  | 1  | 0.04731231 | 6766.62964  | 8877.3141  | 17429.7522 | 10064.7441 | 8747.79347 | 5163.59054 | 6098.11585 | 11947.9684 | 4189.93197  | 4898.85992 | 7672.69046 | 3794.39413 | 7372.7684  | 7480.43425 | 6346.4877   | 4533.9863  | 4684.4584   | 4804.67508  |             |
| Q9R112  | Spor   | Sulfide quinone oxidoreductase, mitochondrial            | 854.85  | 39.78 | 10282  | 14 | 215347.3   | 21379.654   | 210331.881 | 26876.7941 | 241366.035 | 220449.448 | 188108.898 | 23541.503  | 245476.705 | 169911.978  | 22616.4209 | 203540.983 | 166828.58  | 229111.965 | 220964.745 | 246325.044  | 158950.996 | 188949.718  | 220088.908  |             |
| Q64337  | Spr4   | Serpinin reductase                                       | 883.83  | 81.4  | 48163  | 2  | 6494.9505  | 10257.3535  | 4901.0624  | 6406.14664 | 7031.1929  | 12710.4584 | 7799.10061 | 1915.905   | 607.23639  | 5318.5238   | 13026.2422 | 3696.53307 | 8948.87492 | 4671.98329 | 6734.50123 | 6734.50123  | 4731.76319 | 15256.864   |             |             |
| Q49V75  | Srch1  | Sl RNA-binding domain-containing protein 1               | 119.2   | 6.25  | 10282  | 1  | 0.04731231 | 21239.2654  | 8241.04099 | 6371.16561 | 11407.98   | 12031.425  | 7698.88821 | 7658.49881 | 9822.14442 | 10942.5677  | 13496.1067 | 5844.17231 | 11294.0161 | 6214.05917 | 14099.8488 | 11537.0236  | 7800.4612  | 8692.39565  | 554.25978   |             |
| DA4208  | Srgap2 | SRLT-ROBO Rho GTPase-activating protein 2                | 97.69   | 23.3  | 120878 | 2  | 0.04731231 | 3991.5277   | 2523.54924 | 9556.28159 | 6387.33776 | 0.03665024 | 10413.3763 | 4578.76365 | 7758.7998  | 830379434   | 10532.6678 | 10323.861  | 6473.0632  | 9798.5306  | 2139.73933 | 5846.62027  | 43143.6465 | 8790.23258  | 8552.41337  |             |
| Q6P069  | Srt1   | Sorcristin                                               | 114.87  | 11.62 | 21627  | 2  | 0.04731231 | 7467.72665  | 7130.59974 | 0.02587718 | 5170.63776 | 10718.2482 | 9207.7669  | 10659.9716 | 9796.9074  | 8142.05478  | 900.45684  | 8207.13962 | 6913.34475 | 7115.29172 | 6547.19825 | 11560.0146  | 6424.73201 | 7726.96355  | 9557.06558  |             |
| Q64674  | Srm    | Spermidine synthase                                      | 395.57  | 28.48 | 33995  | 7  | 72944.873  | 147902.43   | 139311.44  | 55192.3547 | 76384.9528 | 182045.883 | 191439.052 | 185873.803 | 189055.273 | 186695.409  | 307811.186 | 190316.317 | 193874.793 | 184852.434 | 185944.675 | 204271.691  | 143370.173 | 180748.933  | 169023.451  |             |
| P16254  | Srp14  | Signal recognition particle 14 kDa protein               | 174.98  | 37.27 | 12510  | 3  | 0.04731231 | 4478.3695   | 47630.1791 | 62376.5074 | 27349.4033 | 37058.6207 | 30403.262  | 29920.162  | 34860.923  | 18605.909   | 3810.1812  | 4789.1716  | 4916.106   | 40312.2358 | 55245.6628 | 59013.4645  | 31396.5328 | 34466.4893  | 4171.8353   | 24538.9617  |
| Q9D746  | Srp19  | Signal recognition particle 19 kDa protein               | 132.76  | 18.06 | 16191  | 2  | 0.04731231 | 4761.50297  | 4560.12013 | 2128.1174  | 2607.94738 | 0.03665024 | 7514.63646 | 1655.4423  | 7684.43943 | 9152.35697  | 9242.69976 | 7474.05053 | 6808.78503 | 9059.97258 | 7256.58333 | 8970.34408  | 6453.33242 | 9029.36861  | 761.65109   |             |
| Q9R187  | Srp54  | Signal recognition particle 54 kDa protein               | 40.67   | 2.38  | 5572   | 1  | 40270.5893 | 11838.0326  | 16928.8087 | 16056.7187 | 15127.2994 | 21947.4066 | 1694.0973  | 2342.1069  | 7710.967   | 12591.8891  | 14510.6354 | 16316.8394 | 16059.4509 | 16781.1134 | 17261.9944 | 18843.9092  | 18565.6479 | 1532.6941   | 18965.56    |             |
| Q8BMA6  | Srp68  | Signal recognition particle subunit SRP68                | 165.72  | 6.72  | 70574  | 2  | 15306.9546 | 2250.0949   | 29252.7222 | 28860.344  | 2431.2462  | 51963.612  | 4471.9948  | 4944.822   | 48856.0022 | 34776.3126  | 43856.0022 | 43856.0022 | 43856.0022 | 43856.0022 | 43856.0022 | 43856.0022  | 43856.0022 | 43856.0022  | 43856.0022  |             |
| P49962  | Srp9   | Signal recognition particle 9 kDa protein                | 44.99   | 12.79 | 10194  | 1  | 1647.6099  | 6124.5825   | 607.594673 | 3077.66422 | 0.02510227 | 12573.1425 | 17011.7075 | 10286.8099 | 12382.6136 | 9166.32785  | 10788.7905 | 11331.6239 | 12123.5403 | 13472.7578 | 8587.83507 | 14499.1059  | 996.30741  | 12677.4399  | 10091.6835  |             |
| O70551  | Srk21  | SRSF protein kinase 1                                    | 288.67  | 11.27 | 73088  | 5  | 21810.8204 | 26668.858   | 30         |            |            |            |            |            |            |             |            |            |            |            |            |             |            |             |             |             |

|         |          |                                                                     |         |       |        |    |             |            |            |             |            |            |            |            |            |            |             |            |            |            |             |            |            |            |            |            |
|---------|----------|---------------------------------------------------------------------|---------|-------|--------|----|-------------|------------|------------|-------------|------------|------------|------------|------------|------------|------------|-------------|------------|------------|------------|-------------|------------|------------|------------|------------|------------|
| QSDQR4  | Stxbp5l  | Syntaxin-binding protein 5-like                                     | 39.04   | 0.93  | 131844 | 1  | 3253.70551  | 215277.314 | 231392.833 | 120559.41   | 123350.183 | 296720.111 | 289004.347 | 230614.284 | 25405.09   | 268542.021 | 230592.827  | 222737.42  | 246193.345 | 266990.481 | 236595.897  | 232893.562 | 295600.057 | 269153.528 | 213086.157 |            |
| Q9Z129  | Sucl1    | Succinate-CoA ligase [ADP-forming] subunit beta, mitochondrial      | 277.61  | 12.74 | 50114  | 6  | 79368.7383  | 98842.2835 | 119592.996 | 66814.242   | 64565.1975 | 133447.496 | 95009.3341 | 121204.936 | 123488.909 | 89795.174  | 107680.283  | 90834.3692 | 87348.5745 | 73640.2759 | 98872.5193  | 105434.632 | 95258.3567 | 80501.7614 | 110462.135 |            |
| Q9WUM5  | Sucl1    | Succinate-CoA ligase [ADP/GDP-forming] subunit alpha, mitochondrial | 433.64  | 27.75 | 36155  | 7  | 231912.95   | 18402.164  | 187430.511 | 129636.35   | 49830.263  | 193907.457 | 182259.588 | 188259.588 | 132151.93  | 122340.988 | 104735.738  | 133177.817 | 127417.085 | 189844.016 | 184319.249  | 147872.719 | 136794.24  | 141062.35  |            |            |
| Q9Z218  | Sucl2    | Succinate-CoA ligase [GDP-forming] subunit beta, mitochondrial      | 608.22  | 23.79 | 46840  | 8  | 206805.251  | 156263.482 | 141373.895 | 63352.888   | 57159.8173 | 157275.51  | 174826.401 | 189690.25  | 187769.64  | 127445.696 | 136612.149  | 129980.691 | 130585.598 | 111634.177 | 186076.029  | 149961.775 | 110111.174 | 132786.065 | 170354.146 |            |
| Q9CX34  | Sucl1    | Formyl-SGT1 homolog                                                 | 53.67   | 3.27  | 38159  | 1  | 13771.5887  | 003111494  | 030702580  | 74967.43842 | 0202510227 | 030665024  | 030877705  | 127890.988 | 030720765  | 003794434  | 6280.42138  | 11405.2239 | 10143.1154 | 10897.7164 | 2999.85366  | 030380805  | 030396139  | 030343898  | 9276.69125 |            |
| Q8A028  | Sumf1    | Protein-lysine-generating enzyme                                    | 129.39  | 8.6   | 40659  | 2  | 10180.6611  | 17331.8057 | 202075.809 | 10574.2043  | 022510227  | 14611.2271 | 12304.6785 | 144160774  | 17127.0493 | 15179.2174 | 16033.258   | 15819.7669 | 17644.5864 | 15127.9567 | 16771.1895  | 15217.0537 | 18202.5865 | 17020.290  | 2995.1187  |            |
| P61957  | Sumo2    | Small ubiquitin-related modifier 2                                  | 79.17   | 12.63 | 10871  | 1  | 230711.028  | 142459.508 | 140414.779 | 99912.188   | 16170.217  | 107408.942 | 94385.5761 | 112309.322 | 109526.549 | 156177.352 | 134808.253  | 153274.228 | 153178.141 | 157605.363 | 145311.063  | 154379.008 | 147822.511 | 167343.401 | 149945.081 |            |
| Q81854  | Sumo2    | SUN domain-containing protein 2                                     | 174.46  | 8.07  | 81605  | 3  | 30228.8966  | 8485.2583  | 3874.73819 | 36734.1996  | 27493.913  | 11887.4297 | 6870.26848 | 19979.899  | 17465.4044 | 4923.20843 | 8847.74968  | 11921.5013 | 3896.06763 | 13748.2789 | 85033.67899 | 9896.02869 | 10724.7156 | 7033.60254 | 10879.1526 |            |
| Q9Z089  | Supf16h  | FACT complex subunit SPT16                                          | 687.13  | 16.62 | 119829 | 13 | 14964.652   | 149665.262 | 148665.567 | 170846.267  | 165165.037 | 213954.345 | 18357.567  | 170846.267 | 12767.4452 | 176887.082 | 188066.809  | 185758.863 | 158131.756 | 168287.069 | 185831.366  | 146827.069 | 137506.45  | 139666.40  |            |            |
| Q55201  | Supf5h   | Transcription elongation factor SPT5                                | 416.61  | 11.55 | 120664 | 7  | 7682.54601  | 33698.7915 | 34357.3127 | 56390.3647  | 36173.4851 | 30668.6267 | 2639.295   | 27437.4971 | 34528.1159 | 46813.2656 | 48024.5272  | 4726.4886  | 5742       | 40724.7052 | 41805.0743  | 33746.8144 | 42768.6471 | 34876.4861 | 41496.8214 | 36674.8874 |
| Q96283  | Supf6h   | Transcription elongation factor SPT6                                | 52.7    | 1.22  | 19966  | 2  | 0.04731231  | 3405.88116 | 2518.87654 | 1170.17972  | 3862.51102 | 3242.91167 | 9232.86356 | 1484.79108 | 1401.5681  | 36673.6029 | 3424.54599  | 2703.53248 | 2430.01947 | 2826.16859 | 2591.4116   | 3833.44692 | 4291.12699 | 3748.47906 | 1631.53672 |            |
| Q64310  | Surf4    | Surfactant locus protein 4                                          | 99.48   | 5.95  | 40381  | 1  | 129431.425  | 4296.2227  | 48383.8275 | 9816.2129   | 5504.96862 | 3316.97319 | 3105.92928 | 3573.37079 | 8227.8662  | 2391.34168 | 2864.57226  | 3715.6157  | 2658.52694 | 4849.3039  | 3967.03441  | 2267.60834 | 2959.65244 | 3051.3219  | 1824.73583 |            |
| P70279  | Surf6    | Surfactant locus protein 6                                          | 129.53  | 5.35  | 41235  | 2  | 1.02931.425 | 31.281.035 | 30890.9878 | 43458.8155  | 41337.2448 | 28386.6894 | 22852.0613 | 25175.7226 | 28016.3355 | 26155.0975 | 23771.5438  | 26552.8929 | 25288.405  | 29846.0328 | 25559.7211  | 23694.7872 | 27540.3636 | 26198.2786 | 29661.5824 |            |
| Q80U70  | Surz2    | Polycorn protein Surz2                                              | 116.16  | 3.91  | 83026  | 3  | 17283.2847  | 35374.2185 | 27673.5372 | 38284.3847  | 36183.0858 | 18902.4532 | 24789.9266 | 24239.7545 | 26188.1075 | 39626.5138 | 32425.7595  | 19515.4693 | 31990.1166 | 38161.0622 | 37545.4856  | 34109.4137 | 32410.2121 | 40885.6585 | 20316.0711 |            |
| Q80X82  | Synp1c   | Synaptic protein complex 70                                         | 180.97  | 4.62  | 68996  | 3  | 0.04731231  | 87067.9063 | 83304.8704 | 329260.453  | 38313.7831 | 106275.313 | 87902.6013 | 96265.1195 | 84490.1162 | 96645.3806 | 83552.425   | 85063.7442 | 87660.6738 | 72834.6717 | 76791.8369  | 93022.0903 | 112209.462 | 100754.72  | 82464.4653 |            |
| Q80X82  | Synp1c   | Synp1c                                                              | 110.55  | 3.5   | 142284 | 3  | 9144.44734  | 26059.6449 | 26467.9648 | 76635.8956  | 36625.1825 | 43067.544  | 34700.856  | 46375.815  | 33618.0424 | 17608.978  | 27811.8347  | 23988.117  | 19671.3667 | 17949.336  | 25467.0192  | 37728.7502 | 33447.3646 | 38263.2303 |            |            |
| Q7MTKM9 | Synrnp   | Heterogeneous nuclear ribonucleoprotein Q                           | 922.28  | 32.1  | 69633  | 18 | 484203.977  | 962861.006 | 86048.3828 | 676375.998  | 76066.2175 | 766345.628 | 817509.498 | 723373.851 | 746362.668 | 1079712.09 | 870398.229  | 867154.435 | 976362.931 | 856737.559 | 118912.255  | 933568.27  | 937102.726 | 995655.97  | 860487.709 |            |
| O55110  | Synrnp2  | Synrnp2                                                             | 39.66   | 4.46  | 24778  | 1  | 0.04731231  | 25532.8455 | 18369.36   | 24030.9648  | 1320.6792  | 15830.7168 | 25983.3712 | 20261.6994 | 24500.8675 | 24469.235  | 19166.7098  | 20937.4656 | 24844.9267 | 20640.7935 | 16843.4415  | 16920.8415 | 23721.8152 | 18470.3926 | 11600.2773 |            |
| Q9D6K5  | Synrnp2b | Synaptonemal 2-binding protein                                      | 43.16   | 9.66  | 15815  | 6  | 4153.54528  | 8378.41948 | 8290.6698  | 020587718   | 8975.23747 | 030665024  | 030877705  | 11531.7882 | 8928.48296 | 2565.53219 | 9635.25496  | 9173.42544 | 030267026  | 030520376  | 14682.711   | 030380805  | 7175.30585 | 8245.76256 | 030500218  |            |
| O09117  | Synp1    | Synaptophysin-like protein 1                                        | 83.03   | 4.21  | 28899  | 2  | 1.472.04468 | 31927.8794 | 26611.9759 | 35759.3499  | 36655.9758 | 49614.9922 | 47033.0458 | 1737.37027 | 34701.2243 | 29850.3496 | 26663.6758  | 34774.5265 | 30417.7692 | 25672.0757 | 32196.3076  | 38704.1099 | 41831.4218 | 17211.0486 | 32560.3066 |            |
| Q9WVA4  | Tagln2   | Transgelin-2                                                        | 1756.11 | 79.4  | 22395  | 24 | 1534719.94  | 1218.40455 | 141670.25  | 80504.663   | 9447.51251 | 171049.437 | 1730100.91 | 175174.531 | 1748610.51 | 2263078.68 | 180811.18   | 1908007.95 | 1931821.81 | 1832674.82 | 1505152.63  | 1799258.12 | 1756856.73 | 165204.48  | 162386.15  |            |
| Q92111  | Takol1   | Tandisolidase                                                       | 52.24   | 1.23  | 33867  | 25 | 13783.64    | 1707.74074 | 7927.39443 | 20067.5862  | 7042.72816 | 6172.5331  | 5505.40775 | 5968.83877 | 4917.51896 | 030794434  | 5895.57302  | 6351.55525 | 6740.17397 | 11937.415  | 9365.40254  | 7475.32526 | 6047.11754 | 8675.3444  | 5125.21855 |            |
| Q93U1H  | Tampn4l  | Phosphatidyl cytidyltransferase, mitochondrial                      | 38.32   | 3.86  | 37828  | 1  | 0.04731231  | 7007.74074 | 7927.39443 | 20067.5862  | 7042.72816 | 6172.5331  | 5505.40775 | 5968.83877 | 4917.51896 | 030794434  | 5895.57302  | 6351.55525 | 6740.17397 | 11937.415  | 9365.40254  | 7475.32526 | 6047.11754 | 8675.3444  | 5125.21855 |            |
| Q93U47  | Tao3k    | Serine/threonine-protein kinase TAO3                                | 164.73  | 5.01  | 105474 | 4  | 18064.2631  | 20879.7553 | 22225.3899 | 14818.1834  | 12889.2527 | 29802.6756 | 31939.5362 | 26090.9619 | 26644.056  | 29851.92   | 22277.7736  | 22857.4342 | 31172.1674 | 34645.3236 | 22879.1927  | 20491.4874 | 33557.1456 | 29889.2059 | 25845.1906 |            |
| P21958  | Tarp1    | Antigen peptide transporter 1                                       | 107.65  | 4.14  | 78864  | 2  | 0.04731231  | 1139.51877 | 10025.3089 | 11827.5826  | 18998.5264 | 8184.02121 | 6174.32101 | 9049.39659 | 9523.51601 | 6790.3126  | 1034.22215  | 11079.9135 | 4469.80524 | 11541.0352 | 12027.6346  | 9548.49928 | 9668.30522 | 8355.75826 | 8929.72691 |            |
| P36371  | Tarp2    | Antigen peptide transporter 2                                       | 55.25   | 1.85  | 77445  | 1  | 0.04731231  | 12185.8808 | 14865.6695 | 26815.7684  | 28254.7826 | 14726.4519 | 13269.3196 | 17344.5183 | 16008.5175 | 030794434  | 9044.59272  | 12068.8031 | 8734.83863 | 10348.7235 | 11320.545   | 10899.577  | 10872.8925 | 030343898  | 10560.1788 |            |
| Q96273  | Tarpp    | Tarpp                                                               | 258.6   | 14.62 | 49736  | 5  | 9154.20479  | 3140.2813  | 116374.609 | 136498.59   | 133590.127 | 62632.4408 | 61985.2012 | 68176.3499 | 79888.523  | 7118.0602  | 80063.1942  | 71817.7806 | 68188.7849 | 79938.8614 | 68947.2381  | 86342.1613 | 69823.9469 | 79565.1883 | 85584.2709 |            |
| Q92172  | Tarppb   | TAR DNA-binding protein 43                                          | 810.68  | 39.61 | 44548  | 12 | 391912.19   | 251283.948 | 285981.268 | 38720.2627  | 38140.758  | 379621.681 | 359743.211 | 399204.469 | 417207.758 | 292226.474 | 3114423.575 | 36705.552  | 28845.638  | 40228.949  | 33908.258   | 38019.374  | 31321.6271 | 311659.655 | 319091.946 |            |
| Q92172  | Tarppb   | Tarppb                                                              | 810.68  | 39.61 | 44548  | 12 | 391912.19   | 251283.948 | 285981.268 | 38720.2627  | 38140.758  | 379621.681 | 359743.211 | 399204.469 | 417207.758 | 292226.474 | 3114423.575 | 36705.552  | 28845.638  | 40228.949  | 33908.258   | 38019.374  | 31321.6271 | 311659.655 | 319091.946 |            |
| Q92172  | Tarppb   | Tarppb                                                              | 810.68  | 39.61 | 44548  | 12 | 391912.19   | 251283.948 | 285981.268 | 38720.2627  | 38140.758  | 379621.681 | 359743.211 | 399204.469 | 417207.758 | 292226.474 | 3114423.575 | 36705.552  | 28845.638  | 40228.949  | 33908.258   | 38019.374  | 31321.6271 | 311659.655 | 319091.946 |            |
| Q92172  | Tarppb   | Tarppb                                                              | 810.68  | 39.61 | 44548  | 12 | 391912.19   | 251283.948 | 285981.268 | 38720.2627  | 38140.758  | 379621.681 | 359743.211 | 399204.469 | 417207.758 | 292226.474 | 3114423.575 | 36705.552  | 28845.638  | 40228.949  | 33908.258   | 38019.374  | 31321.6271 | 311659.655 | 319091.946 |            |
| Q92172  | Tarppb   | Tarppb                                                              | 810.68  | 39.61 | 44548  | 12 | 391912.19   | 251283.948 | 285981.268 | 38720.2627  | 38140.758  | 379621.681 | 359743.211 | 399204.469 | 417207.758 | 292226.474 | 3114423.575 | 36705.552  | 28845.638  | 40228.949  | 33908.258   | 38019.374  | 31321.6271 | 311659.655 | 319091.946 |            |
| Q92172  | Tarppb   | Tarppb                                                              | 810.68  | 39.61 | 44548  | 12 | 391912.19   | 251283.948 | 285981.268 | 38720.2627  | 38140.758  |            |            |            |            |            |             |            |            |            |             |            |            |            |            |            |

|        |           |                                                              |         |       |       |    |            |             |            |            |            |            |            |             |             |             |             |            |            |            |            |            |            |            |            |            |
|--------|-----------|--------------------------------------------------------------|---------|-------|-------|----|------------|-------------|------------|------------|------------|------------|------------|-------------|-------------|-------------|-------------|------------|------------|------------|------------|------------|------------|------------|------------|------------|
| Q510H4 | Tmc01     | Calcium load-activated calcium channel                       | 241.41  | 24.47 | 21175 | 4  | 218376.542 | 11798.751   | 128945.512 | 160504.981 | 154269.038 | 148016.359 | 115456.27  | 150071.69   | 13715.21    | 122425.40   | 120488.39   | 117030.789 | 120398.665 | 121623.927 | 138345.615 | 162649.779 | 119293.052 | 131313.404 | 135383.518 |            |
| Q63584 | Tmed10    | Transmembrane emp24 domain-containing protein 10             | 412.94  | 27.85 | 24858 | 7  | 286869.873 | 194174.272  | 232581.43  | 244686.974 | 233169.59  | 257668.126 | 283257.092 | 292041.53   | 1824208.664 | 187218.184  | 193910.214  | 208421.504 | 209427.663 | 231512.07  | 253509.269 | 203677.617 | 205443.928 | 255107.598 |            |            |
| Q63524 | Tmed2     | Transmembrane emp24 domain-containing protein 2              | 220.16  | 12.44 | 22733 | 3  | 12863.1198 | 8743.41214  | 119833.749 | 56612.456  | 21605.2885 | 12710.1931 | 8431.67091 | 13351.2367  | 202.33078   | 7901.34415  | 5431.72658  | 4172.63612 | 6098.43608 | 0.03502376 | 2552.37772 | 8446.45197 | 13275.3867 | 8407.3482  | 7968.66764 |            |
| Q8R1V4 | Tmed3     | Transmembrane emp24 domain-containing protein 4              | 193.16  | 14.98 | 26022 | 4  | 0.04731231 | 12757.16258 | 14189.5638 | 0.02587718 | 4176.17368 | 17068.2349 | 3474.25237 | 9480.12452  | 19654.3431  | 6059.37315  | 14474.3826  | 14690.5656 | 2563.4733  | 4448.22341 | 75751.201  | 11862.3128 | 10601.151  | 8665.5421  | 15962.6369 |            |
| Q8R1V5 | Tmed3     | Transmembrane emp24 domain-containing protein 4              | 111.79  | 13.97 | 25236 | 3  | 0.04731231 | 13489.0761  | 18224.6561 | 13234.0854 | 11523.3075 | 14645.921  | 6917.60369 | 80867.3316  | 11846.2409  | 11017.7412  | 14129.9065  | 7015.6991  | 7015.6991  | 11017.7412 | 14129.9065 | 7015.6991  | 7015.6991  | 11017.7412 | 14129.9065 |            |
| DZ1X70 | Tmed7     | Transmembrane emp24 domain-containing protein 7              | 66.08   | 5.75  | 24629 | 1  | 0.04731231 | 12995.1955  | 14162.5277 | 16093.0697 | 13656.7384 | 10451.1504 | 10126.4462 | 9890.1232   | 90011.90332 | 8268.74287  | 8126.51205  | 2795       | 7864.3915  | 12573.7131 | 1381.2886  | 7087.1054  | 9049.59122 | 10654.9194 | 9398.69352 |            |
| Q510E7 | Tmed9     | Transmembrane emp24 domain-containing protein 9              | 314     | 20    | 27028 | 6  | 0.04731231 | 103490.725  | 92747.7037 | 60923.081  | 84126.8004 | 106826.249 | 100967.668 | 124541.405  | 123166.881  | 83799.4088  | 102047.244  | 93522.4277 | 92009.4344 | 91997.4822 | 103550.129 | 132255.814 | 84523.4591 | 90256.6922 | 116241.413 |            |
| Q8VCO4 | Tmem106a  | Transmembrane protein 106A                                   | 39.79   | 6.9   | 29109 | 1  | 0.04731231 | 12633.701   | 1572.84531 | 0.02587718 | 9536.20418 | 0.03665024 | 0.03877705 | 8646.44855  | 8276.61876  | 631794.9434 | 9230.53113  | 9486.35469 | 0.03627604 | 10213.7429 | 11482.0421 | 13619.3995 | 14746.8465 | 8996.03343 | 11466.3991 |            |
| Q3UBX0 | Tmem109   | Transmembrane protein 109                                    | 111.18  | 11.52 | 26302 | 2  | 0.04731231 | 0.03111494  | 10074.6112 | 2399.5559  | 0.02510227 | 14039.813  | 11738.0897 | 4673.70217  | 4892.9208   | 10984.7166  | 9260.4373   | 12574.9515 | 6952.54169 | 10150.5348 | 9205.2026  | 18520.9287 | 24963.6324 | 9990.72647 | 23496.4874 |            |
| BO8N86 | Tmem11    | Transmembrane protein 11, mitochondrial                      | 39.77   | 8.42  | 21364 | 1  | 0.04731231 | 10272.2523  | 13299.4533 | 13845.5912 | 11319.4538 | 10343.6107 | 11102.1928 | 1112.7687   | 8672.23791  | 8328.40561  | 10448.4236  | 10576.4035 | 1902.19701 | 14549.3577 | 15203.3727 | 13827.2543 | 9316.1181  | 10814.8954 | 13841.2024 |            |
| Q9C0N6 | Tmem14c   | Transmembrane protein 14C                                    | 358.02  | 92.11 | 11642 | 5  | 11584.4074 | 54295.92    | 67770.9326 | 99481.831  | 68706.5449 | 73741.6039 | 43216.7006 | 60226.2638  | 3085        | 8021.3215   | 47555.427   | 42587.4653 | 52786.7074 | 36727.4512 | 45255.9231 | 65345.7765 | 67400.8573 | 64398.5204 | 44029.9186 | 58595.1303 |
| P52875 | Tmem165   | Transmembrane protein 165                                    | 56.39   | 3.41  | 34791 | 1  | 1201.16985 | 5335.5975   | 7376.12484 | 13977.8154 | 13394.7393 | 9099.28125 | 5196.07834 | 6281.46555  | 8905.47455  | 2559.03462  | 6448.89457  | 7335.27559 | 4287.02073 | 7255.29151 | 7667.09565 | 5562.02944 | 7012.61858 | 7487.07404 | 7259.11987 |            |
| Q9CR64 | Tmem167a  | Protein kish-A                                               | 96.69   | 25    | 8074  | 2  | 18462.0059 | 21154.162   | 2264.7515  | 29002.5246 | 23158.2102 | 20386.2152 | 16881.0267 | 16389.19995 | 7211        | 14055.427   | 11805.9253  | 21965.0076 | 18656.179  | 2007.3223  | 22545.5378 | 20394.6676 | 23552.8869 | 18510.400  | 18000.2846 |            |
| Q31BT3 | Tmem173   | Stimulator of interferon genes protein                       | 71.12   | 5.82  | 42830 | 2  | 0.04731231 | 19784.1495  | 25104.1568 | 22048.225  | 15396.4899 | 23844.5176 | 18731.2517 | 23232.6375  | 12727.088   | 15850.012   | 19629.508   | 20657.225  | 15831.3055 | 18637.549  | 25486.2926 | 26787.1627 | 18895.9614 | 15175.0865 | 22237.0234 |            |
| Q9R1Q6 | Tmem176b  | Transmembrane protein 176B                                   | 48.2    | 5.7   | 28367 | 1  | 0.04731231 | 1738.73031  | 486.717841 | 1142.61231 | 2822.19827 | 0.03665024 | 0.03877705 | 1089.80253  | 0.03458008  | 672.408419  | 1648.04201  | 5929.46915 | 5750.53537 | 2597.18254 | 2095.33949 | 667.42707  | 1852.254   | 2055.3949  | 667.42707  |            |
| Q91XL7 | Tmem189   | Transmembrane protein 189                                    | 37.2    | 3.69  | 31134 | 1  | 6157.2315  | 11564.9036  | 12987.7633 | 12949.1837 | 12456.1504 | 19811.3677 | 16686.8213 | 21920.8701  | 16720.0491  | 9477.466    | 0.03500571  | 12610.7277 | 14383.6689 | 12987.2769 | 16926.95   | 0.03808805 | 8912.46056 | 10545.065  | 9834.97309 |            |
| Q91X0E | Tmem205   | Transmembrane protein 205                                    | 56.21   | 8.99  | 21180 | 1  | 0.04731231 | 6291.14662  | 7441.24478 | 2272.0774  | 7864.40077 | 13541.7824 | 12212.9759 | 13890.4893  | 15377.636   | 614.98226   | 8413.7746   | 8266.49201 | 6927.47979 | 12639.2754 | 10123.9324 | 8472.77785 | 7237.02847 | 7397.51510 | 7313.76786 |            |
| Q9D7Y1 | Tmem206   | Transmembrane protein 206                                    | 155.94  | 21.14 | 40178 | 4  | 4880.4919  | 23073.1897  | 23436.1177 | 28640.7399 | 25103.4928 | 48971.954  | 38707.6903 | 39301.7007  | 44395.589   | 26785.385   | 32696.0057  | 27660.2132 | 22826.6551 | 28354.7624 | 24854.4141 | 31160.2155 | 9233.9974  | 24610.9451 | 32770.7282 |            |
| A111L2 | Tmem214   | Transmembrane protein 214                                    | 65.71   | 2.04  | 76566 | 1  | 1201.16985 | 5335.5975   | 7376.12484 | 13977.8154 | 13394.7393 | 9099.28125 | 5196.07834 | 6281.46555  | 8905.47455  | 2559.03462  | 6448.89457  | 7335.27559 | 4287.02073 | 7255.29151 | 7667.09565 | 5562.02944 | 7012.61858 | 7487.07404 | 7259.11987 |            |
| Q9CR67 | Tmem33    | Transmembrane protein 33                                     | 189.19  | 13.36 | 28031 | 4  | 0.04731231 | 22995.1955  | 22745.8227 | 14460.2544 | 86011.2159 | 21145.156  | 55350.4468 | 7748.21714  | 3899.458    | 2679.1819   | 6798.261    | 45617.234  | 69466.4713 | 93382.1858 | 68443.0795 | 5831.9015  | 59182.1379 | 67018.2914 |            |            |
| Q9DBS1 | Tmem43    | Transmembrane protein 43                                     | 347.7   | 24.75 | 47873 | 7  | 69471.4752 | 104128.401  | 109407.81  | 188976.584 | 189336.018 | 135606.25  | 122652.54  | 141772.244  | 132666.965  | 64239.5447  | 98725.0883  | 7970.7432  | 8961.5119  | 10819.6174 | 118921.844 | 105921.864 | 102901.044 | 81413.611  | 93970.391  |            |
| Q9QY73 | Tmem59    | Transmembrane protein 59                                     | 40.88   | 3.1   | 36314 | 1  | 0.04731231 | 12825.589   | 1456.7456  | 0.02587718 | 0.02510227 | 0.03665024 | 0.03877705 | 0.03837823  | 4360.92052  | 1927.97538  | 4048.77054  | 2243.12645 | 0.03627604 | 0.03502376 | 8652.73466 | 9050.40572 | 4598.19262 | 0.03434898 | 9359.01011 |            |
| Q91Y18 | Tmem63a   | CSCI-1-like protein 1                                        | 41.22   | 14.9  | 91860 | 1  | 0.04731231 | 4121.5018   | 0.03072004 | 9944.23632 | 7723.90186 | 5140.98709 | 0.03877705 | 7857.19117  | 5247.86328  | 303979434   | 0.03500571  | 0.03545808 | 0.03627604 | 4793.44152 | 4072.68768 | 4529.54042 | 4836.55215 | 0.03434898 | 2647.1631  |            |
| Q91H50 | Tmod3     | Tropomodulin-3                                               | 319.1   | 29.26 | 39033 | 7  | 77803.4459 | 102653.149  | 75689.3352 | 37231.7175 | 38266.5751 | 111544.737 | 138381.206 | 128167.515  | 138622.478  | 162771.633  | 147554.548  | 107641.658 | 153841.922 | 136917.342 | 135151.302 | 131182.008 | 106112.128 | 141323.634 | 126935.467 |            |
| Q61029 | Tmpo      | Lamina-associated polypeptide 2, isoforms alpha/beta         | 1022.51 | 44.25 | 50373 | 16 | 360936.36  | 432833.493  | 438975.846 | 654360.313 | 753318.362 | 362701.11  | 329790.914 | 400693.89   | 424024.039  | 352888.387  | 352456.984  | 340895.791 | 337339.603 | 337688.053 | 423300.767 | 408709.293 | 34398.536  | 362274.255 | 411512.84  |            |
| Q61033 | Tmpo      | Lamina-associated polypeptide 2, isoforms alpha/zeta         | 75.44   | 25.54 | 2543  | 13 | 150980.836 | 208199.151  | 235773.922 | 379902.034 | 406267.54  | 27702.86   | 282208.15  | 232132.229  | 211522.943  | 70883.277   | 211792.02   | 402267.02  | 267325.042 | 227089.286 | 190369.694 | 206249.411 | 25582.152  | 46227.152  |            |            |
| P63312 | Tmb10     | Thymosin beta-10                                             | 101.43  | 47.73 | 5026  | 2  | 21129.219  | 10570.0778  | 22474.7328 | 13408.139  | 18031.3214 | 34521.1736 | 29484.7719 | 29630.9196  | 26769.4399  | 24747.1686  | 26758.409   | 22156.448  | 27832.173  | 28734.3319 | 15470.9723 | 21785.4668 | 31219.3795 | 22493.802  | 1824.1702  |            |
| P62329 | Tmb4x     | Thymosin beta-4                                              | 147.93  | 68.18 | 5053  | 4  | 11543.665  | 12197.1771  | 151985.256 | 78785.3262 | 74458.4539 | 257877.036 | 287954.419 | 307944.773  | 22006.946   | 23654.571   | 192928.209  | 207134.411 | 24234.691  | 220908.751 | 17739.547  | 151783.802 | 234993.583 | 183105.359 | 163817.460 |            |
| Q8VBT0 | Tmx1      | Thioredoxin-related transmembrane protein 1                  | 171.11  | 12.59 | 31396 | 3  | 11658.835  | 9509.5214   | 103916.966 | 120997.835 | 124867.113 | 106178.657 | 88709.391  | 124867.113  | 91601.669   | 78706.864   | 92172.4051  | 87334.0287 | 76702.241  | 78519.3395 | 91739.2605 | 91766.404  | 92172.4051 | 91766.404  |            |            |
| Q5XHK2 | Tmx2      | Thioredoxin-related transmembrane protein 2                  | 185.8   | 12.59 | 31396 | 3  | 0.04731231 | 2173.10065  | 17101.8937 | 44017.2839 | 30045.1063 | 10317.4743 | 5693.57541 | 10744.403   | 14855.7     | 13544.403   | 6241.33156  | 18940.1631 | 7338.93921 | 22199.8831 | 23421.8359 | 9607.81246 | 9690.75047 | 5359.29796 | 6674.44011 |            |
| Q8XZ1Z | Tmx3      | Thioredoxin-related transmembrane protein 3                  | 129.52  | 6.8   | 51848 | 2  | 13181.4198 | 12575.9035  | 9364.1651  | 22362.8265 | 17140.3007 | 11907.8428 | 13380.1213 | 16690.5807  | 16684.8232  | 5051.8135   | 13122.297   | 30866.6013 | 11849.5709 | 10236.7896 | 12994.7468 | 13092.6375 | 40776.5768 | 34590.5462 | 37285.7892 |            |
| Q8C0L0 | Tmx4      | Thioredoxin-related transmembrane protein 4                  | 146.54  | 7.46  | 37131 | 2  | 14963.7142 | 17537.6817  | 16564.9304 | 18454.4418 | 18141.5409 | 19874.4724 | 23427.0595 | 24760.7701  | 22704.875   | 18404.861   | 119092.1122 | 13925.2097 | 15755.667  | 21360.5823 | 15348.4037 | 19937.3349 | 16028.5238 | 15664.1795 | 19898.9127 |            |
| Q9D8Y7 | Tnfrsp182 | Tumor necrosis factor alpha-induced protein 8-like protein 2 | 57.02   | 7.61  | 20635 | 1  | 0.04731231 | 4389.84258  | 6935.9655  | 9353.20549 | 0.02510227 | 10820.690  | 19488.     |             |             |             |             |            |            |            |            |            |            |            |            |            |



|        |         |                                          |         |       |        |    |             |             |            |            |            |            |             |            |            |            |             |             |            |            |            |            |            |             |            |            |
|--------|---------|------------------------------------------|---------|-------|--------|----|-------------|-------------|------------|------------|------------|------------|-------------|------------|------------|------------|-------------|-------------|------------|------------|------------|------------|------------|-------------|------------|------------|
| Q6CZ8R | Tsfm    | Elongation factor Ts, mitochondrial      | 177.19  | 17.28 | 45334  | 3  | 6596.23523  | 13444.1703  | 13790.3529 | 22119.3203 | 7039.9589  | 13288.0879 | 17281.6859  | 16866.906  | 16833.3738 | 11665.288  | 16051.96    | 12576.1195  | 13071.5592 | 17772.8947 | 9956.83262 | 16437.1471 | 12189.7398 | 8522.0387   | 15894.2805 |            |
| Q61187 | Tsg101  | Nuro susceptibility gene 101 protein     | 36.03   | 30.17 | 34324  | 1  | 4.00731231  | 6894.1851   | 17969.5409 | 23258.5917 | 13156.1186 | 27529.2138 | 22349.2587  | 22340.0092 | 25772.2616 | 23859.2601 | 22415.5960  | 22322.2971  | 18105.6161 | 19149.4489 | 21761.8765 | 24646.8621 | 14070.5192 | 24699.7953  | 20351.5939 |            |
| Q62348 | Tsn     | Translin                                 | 380.23  | 31.14 | 26201  | 7  | 80855.3035  | 92993.5219  | 67909.8497 | 34407.4657 | 36267.3645 | 95676.9352 | 128270.5931 | 119060.437 | 86038.968  | 139922.963 | 129196.042  | 101360.977  | 150034.219 | 110752.769 | 97488.1516 | 130246.489 | 88918.2664 | 123957.381  | 11694.521  |            |
| Q9OZET | Tsx     | Translin-associated protein X            | 278.92  | 21.03 | 32926  | 5  | 4.00731231  | 10705.7306  | 16285.3961 | 5490.0059  | 12769.8543 | 18202.491  | 16387.6236  | 15142.4095 | 10905.1198 | 20266.382  | 21798.6134  | 17632.8128  | 19741.6481 | 25265.2176 | 21431.4554 | 25903.5035 | 20249.104  | 19104.2708  | 11682.924  |            |
| Q9OC08 | Tspan31 | Tetraspanin-31                           | 77.46   | 5.71  | 22694  | 1  | 1.1218.3029 | 6041.44001  | 7915.82396 | 9880.36664 | 7720.35455 | 40957.2667 | 9604.29921  | 14037.2885 | 9903.17861 | 6360.3291  | 5294.08589  | 7095.43081  | 6386.12518 | 6209.02396 | 4291.91888 | 7577.9841  | 7966.6911  | 691.9718    | 8851.88793 |            |
| P05067 | Tspo    | Transcription protein                    | 99.86   | 23.67 | 18841  | 2  | 754.653659  | 3519.0703   | 45558.1294 | 7512.044   | 51781.9417 | 39914.7472 | 41834.2859  | 5193.9514  | 17873.918  | 10967.9299 | 5294.08586  | 36496.8274  | 11394.2795 | 40879.2299 | 27969.5465 | 37507.5191 | 37155.1339 | 31909.6421  | 11783.3009 |            |
| Q95WD9 | Tspc    | Pro-cDNA-processing protein TSR1 homolog | 232.45  | 6.1   | 9245   | 1  | 1130.30871  | 28756.1049  | 22580.246  | 9991.3734  | 30819.9976 | 18239.0305 | 25919.7865  | 24586.4297 | 28838.841  | 2549.6112  | 45796.1672  | 44583.6582  | 35232.8614 | 37196.2184 | 2446.0232  | 506110.766 | 26195.404  | 34241.5047  | 34518.2849 |            |
| P23591 | Tst3    | GDP-L-fucose synthase                    | 206.47  | 14.02 | 35878  | 4  | 11630.4191  | 10391.3319  | 62437.0496 | 2402.4857  | 29270.8754 | 126802.799 | 217654.744  | 17956.203  | 146869.247 | 22070.9797 | 176884.744  | 11261.998   | 228842.838 | 196462.619 | 156670.035 | 181464.245 | 98067.9398 | 15132.38    | 101907.381 |            |
| Q5NCO5 | Tt2     | Transcription termination factor 2       | 74.78   | 3.08  | 125530 | 2  | 4.00731231  | 6189.6314   | 7427.5648  | 48007.4294 | 8556.49866 | 6652.56209 | 7029.976    | 927.726    | 50075.925  | 60890.864  | 6653.653    | 12489.4366  | 9161.34895 | 12269.488  | 10098.4086 | 12093.6697 | 7762.5691  | 11791.14868 | 10478.3034 |            |
| Q3UDE2 | Ttl12   | Tubulin--tyrosine ligase-like protein 12 | 345.5   | 12.36 | 74043  | 7  | 90627.9041  | 74102.2242  | 68970.3738 | 41121.325  | 38229.0002 | 92359.8947 | 125410.791  | 104978.197 | 107708.689 | 111926.82  | 98218.6345  | 106894.388  | 114444.909 | 87680.6160 | 83680.2525 | 116240.858 | 84524.6307 | 94196.7781  | 86443.2332 |            |
| A23AS6 | Tin     | Tin                                      | 41.23   | 0.20  | 39068  | 1  | 30602.8689  | 24992.2564  | 14016.3453 | 14394.95   | 15220.3895 | 21311.8047 | 12243.137   | 16271.1799 | 13415.7747 | 2722.7223  | 181949.5861 | 21634.6162  | 16567.0067 | 25571.7598 | 25167.5687 | 24142.1590 | 22439.1986 | 12896.6947  |            |            |
| P68369 | Tuba1a  | Tubulin alpha-1A chain                   | 2545.34 | 75.61 | 50136  | 37 | 6213955.58  | 3801159.44  | 43373.937  | 2514099.3  | 2563806.52 | 6599144.23 | 5913921.24  | 491223.27  | 6271672.27 | 5087306.51 | 5094805.81  | 5590523.36  | 50409677.2 | 5941381.54 | 48629320.9 | 5707321.77 | 5578962.76 | 4947061.98  | 5802778.13 |            |
| P05213 | Tuba1b  | Tubulin alpha-1B chain                   | 2055.20 | 78.71 | 50152  | 39 | 6767609.58  | 408623.707  | 4546485.24 | 2678089.22 | 237082.59  | 229954.24  | 425497.22   | 429522.27  | 6489750.51 | 5548398.61 | 5452803.53  | 54606195.01 | 778792.97  | 7956812.94 | 7956812.94 | 1600646.79 | 606733.99  | 6167845.16  | 7114088.09 |            |
| P68373 | Tuba1c  | Tubulin alpha-1C chain                   | 2609.35 | 79.06 | 49909  | 38 | 6360490.6   | 3751747.17  | 4229961.99 | 2459190.61 | 252085.93  | 6435394.49 | 5841099.17  | 479877.56  | 6131783.88 | 5047068.77 | 5028788.18  | 5405897.84  | 4092361.18 | 5893877.55 | 4765790.16 | 5648245.08 | 5429653.29 | 4886309.35  | 568075.22  |            |
| P68368 | Tuba4a  | Tubulin alpha-4A chain                   | 2081.07 | 60.27 | 49924  | 30 | 28033198.06 | 16102521.66 | 6129472.12 | 1093125.88 | 1222539.42 | 3548193.26 | 3208897.90  | 3730030.74 | 2811927.05 | 2603120.14 | 2441390.41  | 2615456.18  | 291584.98  | 2221054.75 | 2649814.91 | 295364.1   | 2697578.62 | 240956.46   | 2642317.5  |            |
| P85108 | Tub2a   | Tubulin beta-2A chain                    | 62.99   | 61.57 | 49070  | 37 | 7383168.88  | 367025.23   | 438541.55  | 2462368.33 | 3090302.54 | 569201.27  | 564997.63   | 6565942.78 | 564465.63  | 4505942.38 | 3801296.91  | 6542920.90  | 4312423.49 | 6269254.97 | 5159272.92 | 6137912.92 | 529811.87  | 4775623.19  | 6151829.96 |            |
| Q3KRE8 | Tub2b   | Tubulin beta-2B chain                    | 2438.98 | 70.34 | 49953  | 38 | 7334382.52  | 3668544.07  | 3439993.04 | 2462368.33 | 3087062.14 | 658711.23  | 5951606.49  | 656468.16  | 564665.63  | 571501.665 | 5804821     | 6546841.79  | 431870.25  | 6272369    | 5161782.63 | 6142088.58 | 5302613.24 | 4778365.06  | 6157280.22 |            |
| Q40R84 | Tub4    | Tubulin beta-4 chain                     | 1717.98 | 38.89 | 50450  | 26 | 5009796.22  | 2378412.34  | 327922.04  | 1730874.43 | 206450.20  | 5739917.85 | 5149749     | 570178.67  | 446605.95  | 4520304.70 | 4330533.84  | 5133690.99  | 3499330.18 | 4675135.45 | 403916.06  | 4546964.75 | 3924904.6  | 3796529.34  | 4417010.1  |            |
| Q9D6F9 | Tub4a   | Tubulin beta-4A chain                    | 2308.44 | 71.62 | 49886  | 37 | 9175777.04  | 5111014.79  | 5016388.98 | 2900449.15 | 8185764.47 | 820695.9   | 6588883.63  | 7492532.83 | 7124205.92 | 616854.32  | 480308.34   | 7025546.27  | 5659068.8  | 7007555.31 | 7183730.76 | 6693652.23 | 555705.14  | 5504350.67  | 6407893.04 |            |
| P68372 | Tub4b   | Tubulin beta-4B chain                    | 2682.93 | 83.6  | 49951  | 44 | 912778.77   | 5037660.60  | 562381.71  | 323887.97  | 4592130.46 | 9030766.02 | 1755907.18  | 8521135.06 | 818245.41  | 691227.65  | 5458760.78  | 7919015.53  | 6406195.01 | 778792.97  | 7956812.94 | 7956812.94 | 1600646.79 | 6167845.16  | 7114088.09 |            |
| P68997 | Tub5    | Tubulin beta-5 chain                     | 3041.04 | 83.78 | 49671  | 44 | 10746146    | 5888124.7   | 6566799.39 | 3785012.38 | 4370885.53 | 10412301.7 | 9030167.42  | 1008322.18 | 8831412.33 | 8232971.70 | 7000908.39  | 5828985.17  | 6968109.92 | 922288.58  | 2478783.45 | 9051149.88 | 7330895.47 | 729811.91   | 8690905.55 |            |
| P68368 | Tub4a   | Tubulin alpha-4A chain                   | 2081.07 | 60.27 | 49924  | 30 | 28033198.06 | 16102521.66 | 6129472.12 | 1093125.88 | 1222539.42 | 3548193.26 | 3208897.90  | 3730030.74 | 2811927.05 | 2603120.14 | 2441390.41  | 2615456.18  | 291584.98  | 2221054.75 | 2649814.91 | 295364.1   | 2697578.62 | 240956.46   | 2642317.5  |            |
| P85108 | Tub2a   | Tubulin beta-2A chain                    | 62.99   | 61.57 | 49070  | 37 | 7383168.88  | 367025.23   | 438541.55  | 2462368.33 | 3090302.54 | 569201.27  | 564997.63   | 6565942.78 | 564465.63  | 4505942.38 | 3801296.91  | 6542920.90  | 4312423.49 | 6269254.97 | 5159272.92 | 6137912.92 | 529811.87  | 4775623.19  | 6151829.96 |            |
| Q3KRE8 | Tub2b   | Tubulin beta-2B chain                    | 2438.98 | 70.34 | 49953  | 38 | 7334382.52  | 3668544.07  | 3439993.04 | 2462368.33 | 3087062.14 | 658711.23  | 5951606.49  | 656468.16  | 564665.63  | 571501.665 | 5804821     | 6546841.79  | 431870.25  | 6272369    | 5161782.63 | 6142088.58 | 5302613.24 | 4778365.06  | 6157280.22 |            |
| Q40R84 | Tub4    | Tubulin beta-4 chain                     | 1717.98 | 38.89 | 50450  | 26 | 5009796.22  | 2378412.34  | 327922.04  | 1730874.43 | 206450.20  | 5739917.85 | 5149749     | 570178.67  | 446605.95  | 4520304.70 | 4330533.84  | 5133690.99  | 3499330.18 | 4675135.45 | 403916.06  | 4546964.75 | 3924904.6  | 3796529.34  | 4417010.1  |            |
| Q9D6F9 | Tub4a   | Tubulin beta-4A chain                    | 2308.44 | 71.62 | 49886  | 37 | 9175777.04  | 5111014.79  | 5016388.98 | 2900449.15 | 8185764.47 | 820695.9   | 6588883.63  | 7492532.83 | 7124205.92 | 616854.32  | 480308.34   | 7025546.27  | 5659068.8  | 7007555.31 | 7183730.76 | 6693652.23 | 555705.14  | 5504350.67  | 6407893.04 |            |
| P68372 | Tub4b   | Tubulin beta-4B chain                    | 2682.93 | 83.6  | 49951  | 44 | 912778.77   | 5037660.60  | 562381.71  | 323887.97  | 4592130.46 | 9030766.02 | 1755907.18  | 8521135.06 | 818245.41  | 691227.65  | 5458760.78  | 7919015.53  | 6406195.01 | 778792.97  | 7956812.94 | 7956812.94 | 1600646.79 | 6167845.16  | 7114088.09 |            |
| P68997 | Tub5    | Tubulin beta-5 chain                     | 3041.04 | 83.78 | 49671  | 44 | 10746146    | 5888124.7   | 6566799.39 | 3785012.38 | 4370885.53 | 10412301.7 | 9030167.42  | 1008322.18 | 8831412.33 | 8232971.70 | 7000908.39  | 5828985.17  | 6968109.92 | 922288.58  | 2478783.45 | 9051149.88 | 7330895.47 | 729811.91   | 8690905.55 |            |
| Q922F4 | Tub6    | Tubulin beta-6 chain                     | 1790.93 | 61.97 | 50090  | 29 | 294188.49   | 1698612.38  | 1964039.07 | 1026511.09 | 1371991.1  | 3370991.13 | 2766739.34  | 3299303.11 | 296075.06  | 4670212.04 | 4710833.25  | 3213548.39  | 2543417.65 | 2978527.99 | 2754923.62 | 3055240.51 | 2481304.35 | 2278861.86  | 266915.59  |            |
| P83887 | Tubg1   | Tubulin gamma-1 chain                    | 67.79   | 42.1  | 51101  | 1  | 4.00731231  | 2984.79189  | 4133.87809 | 4667.9925  | 5640.42208 | 5924.22042 | 2988.1985   | 36049.279  | 6067.21445 | 3882.7107  | 3934.57278  | 5836.36976  | 1452.09538 | 5696.19288 | 5955.03185 | 3668.20937 | 4547.68456 | 3420.5799   | 4632.01803 |            |
| Q8BF85 | Tuf1    | Elongation factor Tu, mitochondrial      | 851.21  | 48.11 | 49508  | 15 | 133976.546  | 39107.597   | 401551.59  | 3362470.16 | 344110.679 | 499759.103 | 445874.799  | 462963.993 | 519615.286 | 37304.265  | 30668.1085  | 4737957.516 | 380500.853 | 389523.287 | 485144.744 | 501575.527 | 421563.185 | 389432.691  | 413482.844 |            |
| Q5RJR2 | Twf1    | Twinfilin-1                              | 398.27  | 22.86 | 40090  | 7  | 11289.8206  | 46012.0562  | 19398.6688 | 3072.4385  | 21655.1024 | 31725.960  | 32990.5076  | 28477.1897 | 4809.5848  | 346638.223 | 38352.6899  | 37311.4495  | 45501.0009 | 29131.3426 | 39192.3392 | 35994.3889 | 2640.71823 | 3794.34266  |            |            |
| Q9Z0P5 | Twf2    | Twinfilin-2                              | 386.7   | 32.95 | 39471  | 6  | 40657.5994  | 44925.744   | 41433.6256 | 11580.047  | 20874.7874 | 39470.3299 | 55303.7876  | 63893.1808 | 51700.6425 | 68882.198  | 51021.6615  | 52979.4886  | 60452.6487 | 59526.1789 | 5189.5391  | 5915.6907  | 4212.7     | 52987.7062  | 53633.0726 | 49301.0492 |
| Q9GPM1 | Txn1a   | ApoAII-taxilin-1                         | 47.46   | 6.14  | 62369  | 2  | 3961.02975  | 00011494    | 4024.70165 | 9302.1527  | 13615.2501 | 11793.1527 | 12276.6619  | 12770.6287 | 15227.606  | 15457.5373 | 14837.3733  | 15862.1797  | 1919015.53 | 6406195.01 | 778792.97  | 7956812.94 | 7956812.94 | 1600646.79  | 6167845.16 | 7114088.09 |
| P10639 | Txn1b   | Thioredoxin reductase 1, cytoplasmic     | 234.85  | 35.24 | 61875  | 4  | 16537.086   | 133324.82   | 133299.788 | 52496.5637 | 6534.9313  | 147308.755 | 115519.915  | 131788.844 | 266506.416 | 175588.938 | 155624      | 19137.37    | 149358.642 | 175588.938 | 14617.078  | 149358.642 | 175588.938 | 14617.078   | 149358.642 |            |
| Q49805 | Txndc12 | Thioredoxin domain-containing protein 12 | 151.16  | 21.7  |        |    |             |             |            |            |            |            |             |            |            |            |             |             |            |            |            |            |            |             |            |            |

|        |        |                                                                                          |         |       |        |    |            |            |            |            |            |            |            |            |            |            |            |            |            |            |            |            |            |            |            |            |            |           |
|--------|--------|------------------------------------------------------------------------------------------|---------|-------|--------|----|------------|------------|------------|------------|------------|------------|------------|------------|------------|------------|------------|------------|------------|------------|------------|------------|------------|------------|------------|------------|------------|-----------|
| Q9RC68 | Uqcrf8 | Cytochrome b-c1 complex subunit Rieske, cytochrome b-c1 complex subunit 8, mitochondrial | 468.94  | 44.89 | 29368  | 7  | 10159.8812 | 98059.1748 | 120605.669 | 179049.915 | 145658.606 | 42924.9354 | 45002.9316 | 43722.4403 | 43668.808  | 91666.588  | 91666.588  | 12046.5437 | 409064.334 | 83822.803  | 113660.547 | 131021.629 | 117465.112 | 71747.1594 | 91145.266  | 117158.872 |            |           |
| P99028 | Uqcrh1 | Cytochrome b-c1 complex subunit 6, mitochondrial                                         | 49.72   | 20.22 | 10435  | 1  | 7045.5811  | 6733.92596 | 7141.78004 | 10603.765  | 11055.41   | 4753.45095 | 4497.68734 | 5584.86877 | 5233.2106  | 9568.7254  | 9568.7254  | 12046.5437 | 409064.334 | 83822.803  | 113660.547 | 131021.629 | 117465.112 | 71747.1594 | 91145.266  | 117158.872 |            |           |
| P70697 | Urod   | Uroporphyrinogen decarboxylase                                                           | 325.71  | 25.89 | 40692  | 6  | 3719.1712  | 5260.7659  | 47090.3279 | 43908.741  | 39568.495  | 54745.3375 | 58452.9704 | 50317.1064 | 58920.6627 | 6371.8837  | 57882.1697 | 75091.0266 | 67923.7146 | 67421.4162 | 62777.2824 | 61254.6132 | 63800.2286 | 60327.6293 | 62183.4542 | 61828.5412 | 61828.5412 |           |
| P41542 | Uro1   | General vesicular transport factor p115                                                  | 208.86  | 6.26  | 10162  | 5  | 6564.7681  | 9864.69159 | 5059.5279  | 4141.6998  | 6398.747   | 20029.2927 | 20029.2927 | 64158.9783 | 30281.3686 | 15334.5541 | 22515.9722 | 21377.2788 | 15230.6389 | 27577.5544 | 13164.6734 | 18335.1481 | 16140.7036 | 9776.2895  | 25996.0413 | 25996.0413 | 25996.0413 |           |
| P52479 | Usp10  | Ubiquitin carboxyl-terminal hydrolase 10                                                 | 82.6    | 3.54  | 87022  | 2  | 0.04731231 | 10189.5357 | 17160.1023 | 10167.4375 | 10304.4438 | 5245.32739 | 8007.40892 | 8277.22059 | 7355.5156  | 13347.0946 | 11131.3128 | 16597.5764 | 11092.8983 | 14567.2975 | 14017.3805 | 14648.3825 | 8072.41239 | 29597.4389 | 7851.85609 | 7851.85609 | 7851.85609 |           |
| Q9JMA1 | Usp14  | Ubiquitin carboxyl-terminal hydrolase 14                                                 | 1176.23 | 50.71 | 56002  | 20 | 184411.161 | 194860.886 | 11680.065  | 102386.157 | 107992.225 | 28861.156  | 36086.0162 | 35426.5625 | 33233.8745 | 350196.8   | 297270.329 | 294717.319 | 313251.586 | 235263.559 | 262907.627 | 262315.377 | 176.33     | 5.71       | 12325.35   | 12325.35   | 12325.35   | 12325.35  |
| Q9RS41 | Usp15  | Ubiquitin carboxyl-terminal hydrolase 15                                                 | 176.33  | 5.71  | 12325  | 4  | 0.04731231 | 6493.9456  | 10459.3196 | 5111.05811 | 5604.78793 | 40473.3355 | 58480.295  | 14404.3416 | 15095.4325 | 17485.4531 | 11876.3116 | 14245.7814 | 12189.8532 | 19746.1065 | 17803.8943 | 12056.0295 | 14432.0921 | 14098.0932 | 14098.0932 | 14098.0932 | 14098.0932 |           |
| Q3U1D6 | Usp19  | Ubiquitin carboxyl-terminal hydrolase 19                                                 | 341.9   | 7.06  | 150549 | 8  | 23811.4662 | 19965.3677 | 14533.8177 | 26133.6127 | 29868.1934 | 21385.1999 | 20769.5155 | 22799.321  | 27509.895  | 18599.4430 | 23777.3285 | 35608.403  | 25678.5178 | 32153.2341 | 29710.4636 | 20781.7589 | 23305.6649 | 27340.4463 | 22200.7199 | 22200.7199 | 22200.7199 |           |
| Q3T1X9 | Usp39  | U4/U6/U5 tri-snRNP-associated protein 2                                                  | 233.95  | 12.94 | 65146  | 5  | 0.04731231 | 6145.3677  | 39638.2564 | 5470.4371  | 4701.3336  | 5990.0778  | 50690.1266 | 61002.5387 | 64347.3016 | 60584.9407 | 63593.2848 | 60099.945  | 60138.6803 | 52386.0688 | 61516.9489 | 70719.6306 | 39235.9821 | 50440.6138 | 57429.3564 | 57429.3564 | 57429.3564 |           |
| P35123 | Usp4   | Ubiquitin carboxyl-terminal hydrolase 4                                                  | 210.45  | 7.9   | 108343 | 5  | 1267.04603 | 17021.7085 | 15609.6366 | 1280.381   | 12612.9643 | 32138.7892 | 29935.1565 | 25710.9445 | 29455.2491 | 34145.8759 | 24475.2329 | 27409.4714 | 13827.5449 | 12827.5708 | 16366.4262 | 31314.008  | 28034.8117 | 29437.5869 | 32397.2446 | 32397.2446 | 32397.2446 |           |
| P56399 | Usp5   | Ubiquitin carboxyl-terminal hydrolase 5                                                  | 1509.75 | 30.42 | 95833  | 19 | 138143.41  | 13601.805  | 126858.909 | 12863.783  | 158013.699 | 222550.5   | 244966.832 | 205204.689 | 221006.602 | 255675.904 | 230854.109 | 220608.765 | 228357.785 | 263247.824 | 177495.801 | 203925.432 | 191364.882 | 179520.184 | 19317.7197 | 19317.7197 | 19317.7197 |           |
| Q80U87 | Usp8   | Ubiquitin carboxyl-terminal hydrolase 8                                                  | 305.92  | 7.96  | 122611 | 7  | 2891.95531 | 24880.2601 | 33572.5203 | 26192.4228 | 28951.1259 | 43297.3796 | 60349.9337 | 45528.5277 | 46444.9532 | 46562.2815 | 39575.5963 | 50044.113  | 47590.7172 | 55242.1524 | 39617.0594 | 49844.13   | 29261.6498 | 47540.5549 | 44252.9559 | 44252.9559 | 44252.9559 |           |
| Q8C7V3 | Utp15  | U3 small nuclear RNA-associated protein 15 homolog                                       | 342.11  | 17.05 | 59375  | 6  | 42184.4449 | 72487.8386 | 25428.0362 | 68873.5713 | 76996.9084 | 46492.6798 | 61439.5175 | 56912.1274 | 57676.0132 | 79256.1403 | 75925.1640 | 73385.6349 | 73141.1765 | 55356.7013 | 66784.3577 | 87918.0446 | 56842.5505 | 85935.0921 | 76209.7242 | 76209.7242 | 76209.7242 |           |
| Q5SS16 | Utp18  | U3 small nuclear RNA-associated protein 18 homolog                                       | 473.03  | 26.81 | 61218  | 8  | 17618.1333 | 83901.8752 | 52940.741  | 126951.786 | 96813.6822 | 68800.3686 | 47075.153  | 58846.1217 | 71499.9405 | 51272.6116 | 65765.6318 | 63909.6274 | 64889.9864 | 53228.3586 | 68187.3661 | 73759.904  | 80142.5419 | 80074.7091 | 70438.7483 | 70438.7483 | 70438.7483 |           |
| Q9J113 | Utp3   | Something about silencing protein 10                                                     | 110.6   | 4.69  | 53399  | 2  | 5089.5626  | 24724.0592 | 21352.3161 | 28502.7197 | 29422.4084 | 31525.6948 | 28968.7389 | 32926.5067 | 22651.1272 | 24722.5458 | 25045.3883 | 19506.4928 | 25761.5891 | 18196.5388 | 21335.4419 | 27056.6882 | 19320.4744 | 29252.4223 | 23912.7485 | 23912.7485 | 23912.7485 |           |
| R8R2N2 | Utp4   | U3 small nuclear RNA-associated protein 4 homolog                                        | 228.43  | 8.6   | 76909  | 5  | 11325.5287 | 55567.2378 | 34006.239  | 70598.5938 | 52688.5855 | 29757.965  | 2771.8849  | 21896.7031 | 19691.0551 | 5175.3155  | 13720.2437 | 24422.6579 | 29046.5382 | 15605.1643 | 25300.4881 | 18294.892  | 20055.6779 | 33612.9226 | 19085.2337 | 19085.2337 | 19085.2337 |           |
| P63024 | Vamp3  | Vesicle-associated membrane protein 3                                                    | 47.16   | 23.3  | 11480  | 1  | 0.04731231 | 30560.4916 | 26641.4538 | 0.02587718 | 7007.60858 | 37626.0717 | 46098.9792 | 43122.1247 | 39900.3414 | 39700.0517 | 41879.3087 | 42413.6948 | 37015.1104 | 33180.8883 | 36193.7234 | 44013.5025 | 33398.4738 | 43152.0688 | 44690.0464 | 44690.0464 | 44690.0464 |           |
| P70280 | Vamp7  | Vesicle-associated membrane protein 7                                                    | 169.47  | 10    | 24967  | 3  | 0.04731231 | 19354.1838 | 22956.364  | 48106.351  | 28164.5023 | 26436.4329 | 21624.4471 | 18205.7595 | 27683.5924 | 1911.7597  | 15647.7142 | 19514.3131 | 12303.3465 | 18625.5284 | 21859.26   | 19684.5992 | 15453.2711 | 13913.9786 | 13461.4156 | 13461.4156 | 13461.4156 |           |
| T07044 | Vamp8  | Vesicle-associated membrane protein 8                                                    | 70.24   | 16.83 | 11451  | 2  | 23399.466  | 31862.2788 | 33905.6042 | 20692.4664 | 21613.7166 | 25415.9218 | 22903.9881 | 29722.5276 | 29026.4447 | 15409.4237 | 11043.5786 | 6137.0154  | 16203.4643 | 16564.2901 | 18516.9104 | 19888.0628 | 22153.6117 | 17385.6891 | 2541.2103  | 2541.2103  | 2541.2103  |           |
| Q9WV55 | Vapa   | Vesicle-associated membrane protein-associated protein A                                 | 271.38  | 26.51 | 27855  | 5  | 148007.469 | 114314.174 | 137646.868 | 125768.202 | 141886.364 | 114101.201 | 147430.335 | 133319.86  | 161280.288 | 144421.596 | 175539.277 | 139891.933 | 139832.622 | 147200.433 | 191639.778 | 169326.519 | 101268.24  | 135113.999 | 170342.28  | 170342.28  | 170342.28  |           |
| Q9QY76 | Vapb   | Vesicle-associated membrane protein-associated protein B                                 | 386.67  | 30.83 | 26946  | 8  | 222004.095 | 150284.569 | 192531.163 | 239303.148 | 233613.373 | 167795.025 | 160011.106 | 194354.504 | 185610.279 | 181214.215 | 184789.645 | 180011.782 | 17928.142  | 126259.8   | 19444.492  | 206616.695 | 168996.757 | 180561.181 | 191136.919 | 191136.919 | 191136.919 |           |
| Q9Z1Q9 | Vars   | Valine--tRNA ligase                                                                      | 2117.74 | 37.56 | 102215 | 37 | 535518.156 | 622946.171 | 603316.529 | 348856.210 | 403351.108 | 875186.174 | 985716.443 | 922823.455 | 775495.945 | 1087413.73 | 943639.059 | 945477.36  | 943653.75  | 891225.17  | 903169.939 | 822861.558 | 822828.157 | 807272.23  | 74949.316  | 74949.316  | 74949.316  | 74949.316 |
| P70460 | Vasp   | Vasodilator-stimulated phosphoprotein                                                    | 356.57  | 20.8  | 39667  | 7  | 145379.838 | 104751.590 | 128491.966 | 61424.1753 | 77999.6040 | 159982.258 | 155005.568 | 152638.656 | 136999.864 | 172488.401 | 148809.363 | 167753.357 | 153485.804 | 143935.553 | 15539.964  | 143683.475 | 136846.87  | 138702.446 | 126260.601 | 126260.601 | 126260.601 |           |
| Q62465 | Vat1   | Synaptic vesicle membrane protein VAT-1 homolog                                          | 696.42  | 37.19 | 43097  | 12 | 59577.3807 | 83657.3662 | 79213.4403 | 40939.4239 | 38000.1883 | 236275.937 | 249956.94  | 21687.927  | 198732.057 | 124306.095 | 138503.361 | 108011.087 | 109224.77  | 109098.825 | 98813.212  | 106099.478 | 101364.937 | 90749.0419 | 10200.7235 | 10200.7235 | 10200.7235 |           |
| P27870 | Vav1   | Protein-tyrosine kinase                                                                  | 383.45  | 11.12 | 97187  | 8  | 26839.6257 | 47329.4785 | 46039.1037 | 59870.781  | 37215.358  | 112226.395 | 113309.853 | 119894.905 | 107934.766 | 77692.4962 | 66177.6314 | 81907.6915 | 74989.9901 | 51599.1723 | 56162.7863 | 74323.3262 | 82382.1086 | 59572.0494 | 69297.301  | 69297.301  | 69297.301  |           |
| Q9R0C8 | Vav3   | Guanine nucleotide exchange factor VAV3                                                  | 65.16   | 3.54  | 97968  | 2  | 2808.77624 | 31140.5288 | 13974.7013 | 13722.1666 | 16514.151  | 26084.0785 | 23300.6027 | 23642.3228 | 19274.8079 | 20719.2125 | 16597.2347 | 18214.8204 | 16190.2245 | 15380.1399 | 13337.5505 | 21563.3732 | 15250.7793 | 16805.2034 | 16345.5592 | 16345.5592 | 16345.5592 |           |
| P81759 | Vbp1   | Pefelidin subunit 3                                                                      | 245.47  | 32.14 | 22436  | 5  | 0.04731231 | 30560.4916 | 26641.4538 | 0.02587718 | 7007.60858 | 37626.0717 | 46098.9792 | 43122.1247 | 39900.3414 | 39700.0517 | 41879.3087 | 42413.6948 | 37015.1104 | 33180.8883 | 36193.7234 | 44013.5025 | 33398.4738 | 43152.0688 | 44690.0464 | 44690.0464 | 44690.0464 |           |
| R89762 | Vcl    | Vinculin                                                                                 | 822.95  | 16.79 | 116615 | 6  | 46686.6272 | 155204.814 | 143058.97  | 55790.7516 | 76044.9927 | 348471.619 | 340324.332 | 291403.965 | 295312.317 | 259393.316 | 205947.654 | 201935.902 | 221977.451 | 187544.833 | 192346.77  | 182226.692 | 187482.093 | 211271.393 | 167863.462 | 167863.462 | 167863.462 |           |
| P44662 | Vcp    | Transitional endoplasmic reticulum ATPase                                                | 2920.47 | 60.79 | 99349  | 46 | 163354.45  | 148395.59  | 139077.43  | 718608.543 | 647659.629 | 170026.63  | 192874.407 | 195733.378 | 185919.124 | 180961.077 | 133762.73  | 194314.784 | 1670750.29 | 192346.77  | 163602.4   | 147322.72  | 171014.3   | 145137.64  | 145137.64  | 145137.64  | 145137.64  |           |
| Q8CDG3 | Vcp1   | Deubiquitinating protein VCP135                                                          | 100.37  | 2.54  | 134503 | 3  | 0.04731231 | 12300.6787 | 10869.3208 | 3555.49246 | 5022.79794 | 17430.2923 | 14970.7708 | 14073.1998 | 11700.9501 | 20527.4685 | 12839.8218 | 11950.311  | 14617.0883 | 17810.082  |            |            |            |            |            |            |            |           |

|        |         |                                                |         |       |        |    |             |            |             |            |             |            |             |            |             |            |            |              |            |             |            |            |            |            |             |
|--------|---------|------------------------------------------------|---------|-------|--------|----|-------------|------------|-------------|------------|-------------|------------|-------------|------------|-------------|------------|------------|--------------|------------|-------------|------------|------------|------------|------------|-------------|
| Q6P1B1 | Xnppep1 | Xaa-Pro aminopeptidase 1                       | 556.77  | 26.32 | 69591  | 11 | 76749.8302  | 112297.537 | 83888.9305  | 52347.2685 | 71339.7102  | 16919.997  | 170222.013  | 153160.399 | 146621.666  | 138518.861 | 135387.545 | 119977       | 142015.895 | 135063.158  | 139772.931 | 132706.548 | 118393.949 | 112071.929 | 104339.236  |
| B7ZPM1 | Xnppep3 | Xaa-Pro aminopeptidase 3                       | 64.29   | 3.36  | 56677  | 1  | 0.04731231  | 2646.84626 | 3188.72328  | 3461.9493  | 2069.14762  | 2836.59048 | 1918.50884  | 2211.87496 | 3498.70386  | 2211.5652  | 2460.73208 | 3131.59438   | 2427.49961 | 3614.65422  | 3147.79168 | 2684.61892 | 2938.76483 | 2774.88308 | 2974.88308  |
| Q6P5F9 | Xpo1    | Exportin-1                                     | 608.3   | 12.23 | 123093 | 10 | 49888.5236  | 75843.268  | 57171.7716  | 44594.8432 | 44666.1165  | 145535.614 | 157314.858  | 160979.858 | 131860.922  | 94751.2938 | 117865.578 | 97648.7027   | 90377.8447 | 104064.342  | 83762.5012 | 116301.942 | 75145.5312 | 95970.1818 | 95586.4505  |
| Q924C1 | Xpo5    | Exportin-5                                     | 293.84  | 6.64  | 136973 | 6  | 2931.24     | 15645.331  | 9392.94634  | 1801.77785 | 2785.4821   | 2925.6117  | 27330.847   | 30119.9691 | 35664.117   | 26641.351  | 28483.2881 | 22294.0863   | 30208.4235 | 2355.1621   | 28618.4651 | 11768.3525 | 34237.1226 | 17867.6169 | 10692.2544  |
| P27641 | Xrec5   | X-ray repair cross-complementing protein 5     | 50.69   | 1.5   | 83057  | 1  | 79980.2145  | 7062.71602 | 5739.27158  | 9553.55724 | 7064.09107  | 13998.7696 | 16688.4414  | 15503.2374 | 14941.2526  | 11165.359  | 11972.0759 | 9740.49816   | 14578.2965 | 12372.2848  | 0.03488812 | 9295.75044 | 10220.1501 | 11027.2729 | 7881.56751  |
| P23475 | Xrec6   | X-ray repair cross-complementing protein 6     | 39.39   | 2.96  | 69484  | 1  | 0.04731231  | 4848.83531 | 4277.81875  | 6883.19767 | 6662.72536  | 16687.2556 | 16062.23675 | 5374.45531 | 6120.26296  | 4921.9991  | 5992.17074 | 5120.01641   | 7212.29909 | 5683.51925  | 7178.78352 | 5458.83695 | 7008.31448 | 5382.95789 | 5031.99309  |
| Q0D8R1 | Xrc2    | S-3'-exoribonuclease 2                         | 869.56  | 21.14 | 108687 | 16 | 1164.78.59  | 14786.141  | 156808.914  | 15963.152  | 147410.096  | 164815.471 | 164105.418  | 148567.887 | 178670.141  | 183450.011 | 160849.488 | 140734.59    | 162891.018 | 189100.361  | 166606.695 | 187272.615 | 144631.397 | 172564.034 | 190771.776  |
| Q91WQ3 | Yars    | Tyrosine-tRNA ligase, cytoplasmic              | 429.69  | 22.92 | 59105  | 10 | 64079.9333  | 134841.885 | 105772.966  | 58459.9053 | 65340.1234  | 152312.39  | 158547.367  | 164674.991 | 146870.578  | 180839.458 | 168553.801 | 165407.177   | 207201.584 | 119690.878  | 147986.59  | 158224.71  | 128769.773 | 146324.296 | 134048.379  |
| Q8BYL4 | Yars2   | Tyrosine-tRNA ligase, mitochondrial            | 47.87   | 2.54  | 52597  | 1  | 10.475.9355 | 4688.60019 | 5635.74248  | 2106.289   | 5105.78919  | 0.03665024 | 3581.52343  | 3809.07435 | 6972.6286   | 1246.8718  | 3093.58799 | 6822.17703   | 5223.8899  | 6652.65844  | 4193.92931 | 6343.17716 | 5147.44471 | 5784.5935  | 6840.86131  |
| P62960 | Ybx1    | Nuclease-sensitive element-binding protein 1   | 954.34  | 49.07 | 35730  | 11 | 55193.904   | 451039.121 | 504364.205  | 301279.396 | 303249.631  | 640202.3   | 578921.854  | 656204.993 | 648162.773  | 471192.437 | 425484.384 | 635524.041   | 646987.981 | 784220.136  | 431259.306 | 473685.518 | 479726.613 | 381354.256 | 772440.912  |
| Q9JKB3 | Ybx3    | Y-box-binding protein 3                        | 525.42  | 26.87 | 38814  | 7  | 251592.271  | 291969.849 | 340507.972  | 15889.567  | 92629.032   | 497364.891 | 413662.312  | 505411.47  | 452042.513  | 326651.143 | 243406.718 | 473041.687   | 495189.945 | 572465.6    | 303447.89  | 307517.222 | 301209.222 | 222268.506 | 569390.528  |
| Q6PEC3 | Yif1b   | Protein YIF1B                                  | 40.19   | 5.02  | 28418  | 1  | 0.04731231  | 11106.494  | 11507.3322  | 14706.237  | 13084.2053  | 10805.8021 | 4272.87563  | 8689.85318 | 11236.9176  | 7488.42525 | 6229.40336 | 8392.4407    | 6778.86752 | 7480.12061  | 7723.6329  | 12175.9816 | 12156.6879 | 10545.7817 | 7277.73333  |
| Q3UDR8 | Yifp3   | Yif protein YIFP3                              | 38.61   | 6.63  | 37998  | 1  | 18005.4244  | 10031.1494 | 0.03707204  | 0.02597718 | 0.02510227  | 15699.5375 | 0.03877705  | 5132.5396  | 0.03723065  | 0.03500871 | 0.03545808 | 0.03620746   | 0.03502376 | 8220.76358  | 7872.79477 | 0.03396139 | 0.03434899 | 0.03500871 | 0.03500871  |
| Q5EQY4 | Ykt6    | Synaptobrevin homolog YK16                     | 151.14  | 22.73 | 22669  | 3  | 4108.51602  | 18393.5867 | 21355.3998  | 21196.5595 | 0.02510227  | 30016.8504 | 27360.3711  | 25108.7142 | 24663.2663  | 19721.5747 | 28353.5911 | 20830.079    | 21247.1171 | 12643.7409  | 16619.439  | 12034.3618 | 17469.6224 | 11264.0942 | 13740.8435  |
| OR8967 | Yme11l  | ATP-dependent zinc metalloprotease YME11L      | 223.4   | 9.37  | 80028  | 4  | 19766.2409  | 31723.4321 | 40771.375   | 40627.3311 | 39793.317   | 36190.8369 | 21467.9652  | 30479.7671 | 33154.64    | 29637.7099 | 33575.8542 | 31206.0344   | 29886.7346 | 30891.2662  | 46921.0231 | 38956.3122 | 30094.7014 | 34010.8513 | 36658.4078  |
| P62700 | Ype5    | Protein ypep-like 5                            | 94.51   | 19.83 | 13845  | 2  | 0.04731231  | 4972.26627 | 3490.0019   | 4216.23927 | 4724.32492  | 4375.09483 | 6635.1985   | 4602.07937 | 5532.3293   | 4071.33355 | 4850.54539 | 5196.17203   | 4523.19422 | 5767.13457  | 4851.28015 | 4798.8886  | 3762.70563 | 5778.55186 | 5066.64239  |
| Q3USF4 | Yrdc    | YrDC domain-containing protein, mitochondrial  | 54.49   | 5     | 29454  | 1  | 0.04731231  | 00311.1494 | 0.03707204  | 0.02587718 | 0.02510227  | 4216.9771  | 0.03877705  | 0.03837823 | 2710.50559  | 5952.67698 | 5354.08182 | 7002.71503   | 4900.37732 | 37529.83472 | 0.03488812 | 5125.33096 | 5457.09259 | 6042.14217 | 3707.1399   |
| E9QSK9 | Ythd1   | YTH domain-containing protein 1                | 50.96   | 1.22  | 85649  | 1  | 0.04731231  | 7732.40079 | 9041.65273  | 24536.2641 | 15819.0475  | 4111.84351 | 3539.80805  | 0.03837823 | 4093.41712  | 9519.09739 | 7736.62533 | 12212.4039   | 8897.03176 | 11725.3455  | 10668.7335 | 9112.27918 | 10261.0408 | 7726.70868 | 9571.8386   |
| P59326 | Ythd1   | YTH domain-containing family protein 1         | 87.28   | 4.29  | 60879  | 2  | 15902.1526  | 5058.74403 | 5852.8946   | 4577.0245  | 6229.40796  | 6371.21073 | 6395.57027  | 8255.95206 | 6128.44063  | 6988.90218 | 4263.96037 | 6832.20227   | 7701.21913 | 8026.6155   | 6043.38829 | 8052.81678 | 6988.57283 | 6041.44966 | 7075.51313  |
| Q91V17 | Ythd2   | YTH domain-containing family protein 2         | 163.47  | 5.53  | 62380  | 3  | 8424.66877  | 40285.0551 | 50364.8939  | 27999.9302 | 45299.5431  | 60680.2889 | 46292.418   | 53405.4087 | 47033.3565  | 58961.6008 | 49057.2244 | 52993.9953   | 52391.6668 | 55483.2238  | 60414.5584 | 64152.3422 | 62981.1538 | 57311.9045 | 59358.078   |
| Q8BYK6 | Ythd3   | YTH domain-containing family protein 3         | 210.46  | 8.72  | 63961  | 4  | 8424.66877  | 16728.8565 | 38883.2127  | 8239.9272  | 13391.9921  | 19871.1579 | 21605.0495  | 21420.6609 | 41022.1952  | 23279.9597 | 1544.0461  | 44446.2936   | 23077.0614 | 21880.3448  | 23485.2843 | 47977.9491 | 38649.1241 | 20904.3781 | 4521.6889   |
| Q9CQV8 | Ywhab   | 14-3-3 protein beta/alpha                      | 847.91  | 48.37 | 28086  | 13 | 356454.813  | 1069483.02 | 662559.362  | 264373.979 | 365045.872  | 1456634.06 | 2762634.87  | 1543925.95 | 2338793.56  | 1842260.64 | 2007669.15 | 2011365.64   | 2382911.9  | 1927405.14  | 1696119.75 | 1395290.07 | 1578841.33 | 1714342.27 | 1639861.05  |
| P62259 | Ywhae   | 14-3-3 protein epsilon                         | 1078.54 | 63.92 | 29174  | 19 | 1529188.76  | 1196454.22 | 1521907.629 | 632068.311 | 878256.362  | 2653177.78 | 4098520.78  | 2919056.64 | 3422290.56  | 2882598.4  | 3049091.98 | 2855572.99   | 3542444.58 | 2568402.79  | 2572003.24 | 2599693.78 | 2694285.45 | 2685746.44 | 2528346.2   |
| P619R2 | Ywhag   | 14-3-3 protein gamma                           | 778.16  | 50.2  | 28303  | 14 | 564230.06   | 1006688.88 | 861474.75   | 238776.444 | 298922.25   | 1342645.52 | 227930.34   | 1508093.54 | 2228003.02  | 1726128.28 | 1960925.05 | 1867832.19   | 2285396.51 | 1841629.14  | 1618140.75 | 1347343.31 | 1411306.67 | 1634000.79 | 1574404.59  |
| P68510 | Ywhah   | 14-3-3 protein eta                             | 540.26  | 32.52 | 28212  | 10 | 198584.324  | 1006688.88 | 861474.75   | 238776.444 | 298922.25   | 1342645.52 | 227930.34   | 1508093.54 | 2228003.02  | 1726128.28 | 1960925.05 | 1867832.19   | 2285396.51 | 1841629.14  | 1618140.75 | 1347343.31 | 1411306.67 | 1634000.79 | 1574404.59  |
| P68254 | Ywhaq   | 14-3-3 protein theta                           | 757.04  | 44.08 | 27778  | 12 | 304164.958  | 1063463.4  | 617014.303  | 258795.627 | 345239.152  | 1440426.75 | 2764962.73  | 1555009.31 | 2278591.32  | 1854144.6  | 2095529.83 | 1979504.57   | 2413871.74 | 1938461.16  | 1685584.1  | 1413943.76 | 1526075.52 | 1721464.15 | 1660773.04  |
| P63101 | Ywhaz   | 14-3-3 protein zeta/delta                      | 956.45  | 48.98 | 27771  | 14 | 1065028.64  | 1456772.41 | 1053165.37  | 493903.205 | 615952.851  | 356115.9   | 2292806.08  | 2974186.18 | 2514099.15  | 2659096.2  | 2607760.16 | 3057391.75   | 2443431.27 | 2219818.66  | 2026587.53 | 21631.51   | 22         | 228911.52  | 2214508.94  |
| PKC9P6 | Yyz     | Transcription factor Yyz                       | 40.02   | 2.13  | 41805  | 1  | 16762.9626  | 22421.9597 | 29007.1178  | 15160.1568 | 16322.2860  | 22369.2884 | 16411.0352  | 158483.387 | 182052.5614 | 25190.1525 | 22318.4799 | 34188.0652   | 20378.3947 | 20400.3445  | 22613.5063 | 22005.1063 | 18304.6128 | 19940.7904 | 22311.6733  |
| Q9NZF1 | Zc3h11a | Zinc finger CCHH domain-containing protein 11A | 483.24  | 16.79 | 86492  | 10 | 32027.1667  | 63221.3888 | 70285.8409  | 134843.809 | 150190.1813 | 56653.5274 | 49451.658   | 57243.2836 | 52046.7703  | 88512.770  | 71652.7252 | 69238.8747   | 79548.3285 | 76759.9382  | 68261.342  | 68906.6491 | 50096.176  | 82817.8876 | 655070.4743 |
| Q8B105 | Zc3h14  | Zinc finger CCHH domain-containing protein 14  | 80.3    | 4.08  | 82409  | 2  | 0.04731231  | 16225.2463 | 15701.2763  | 39485.571  | 32489.0398  | 5237.22658 | 9788.27932  | 15266.5134 | 14704.1207  | 3202.00571 | 11964.0211 | 10432.3499   | 12975.0142 | 11146.2875  | 17839.0982 | 11394.9222 | 12325.2942 | 0.03500218 | 0.03500218  |
| Q3T1V5 | Zc3h15  | Zinc finger CCHH domain-containing protein 15  | 188.14  | 8.22  | 48327  | 3  | 14379.9276  | 40083.4627 | 35122.2887  | 23868.3891 | 17953.4473  | 43347.2148 | 43001.5364  | 38015.9664 | 44194.4076  | 48665.3799 | 49862.4387 | 34379.3551   | 41148.8756 | 39963.5161  | 47683.0233 | 45183.8005 | 33994.8909 | 40102.5919 | 47482.3508  |
| Q0P678 | Zc3h18  | Zinc finger CCHH domain-containing protein 18  | 36.96   | 2.64  | 105694 | 1  | 0.04731231  | 5503.4619  | 16939.6583  | 17657.3611 | 11172.7624  | 3607.88737 | 0.03877705  | 0.03877705 | 0.03727065  | 6206.11455 | 9886.87604 | 7407.43531   | 7644.69132 | 13003.0683  | 7381.73418 | 11649.337  | 9479.75261 | 7545.45116 | 11584.5232  |
| Q3UPF5 | Zc3hav1 | Zinc finger CCHH-type antiviral protein 1      | 96.46   | 2.96  | 106688 | 2  | 55434.1124  | 6697.01135 | 8485.31505  | 8106.02404 | 8771.72232  | 10522.9368 | 0.03877705  | 13400.9137 | 14868.7308  | 13105.1208 | 12916.5126 | 16543.7622   | 12167.8323 | 16797.81    | 8153.43992 | 10090.0124 | 10046.1129 | 10202.426  | 9942.19353  |
| Q0D270 | Zhdhc21 | Probable palmitoyltransferase ZHDHC21          | 49.75   | 3.02  | 31331  | 1  | 6219.82855  | 3003.60912 | 4217.37611  | 7225.3805  | 5544.52396  | 9331.12963 | 1864.15524  | 2996.69927 | 4082.71933  | 2160.06294 | 3009.40172 | 3085.44762   | 2247.81194 | 4319.2926   | 3509.27694 | 3343.09781 | 2490.00618 | 2044.19127 | 2803.18259  |
| Q91X58 | Zhdhc22 | AN1-type zinc finger protein 2B                | 65.64   | 5.84  | 27895  | 1  | 4521.34625  | 0.0311494  | 4642.88376  | 0.02587718 | 0.02587718  | 2678.22847 | 3628.6008   | 0.03877705 | 0.03877705  | 0.03727065 | 6206.11455 | 9886.87604</ |            |             |            |            |            |            |             |
