# Supplementary material for: Does size matter? A proteomics-informed comparison of the effects of polystyrene beads of different sizes on macrophages
Source: Royal Society of Chemistry journal article supplement (doi:10.1039/d2en00214k), 2022-01-01
Supplement: d2en00214k4.pdf [file d2en00214k4.pdf]

**Supplementary Table 10: results of the pathway analysis by the David tool on the proteins modulated in response to 1 micrometer polystyrene particles**

selection of clusters by a FDR cutoff value of 0.1

**Annotation Cluster 1** Enrichment Score: 46.56191116100873

| Category         | Term                                           | Count | %                | PValue               | Genes                                                                                                                                                                                                                                                                                                                                                                                                                                                                                                                                                                                                                                                                                                                                                                                  | FDR                  |
|------------------|------------------------------------------------|-------|------------------|----------------------|----------------------------------------------------------------------------------------------------------------------------------------------------------------------------------------------------------------------------------------------------------------------------------------------------------------------------------------------------------------------------------------------------------------------------------------------------------------------------------------------------------------------------------------------------------------------------------------------------------------------------------------------------------------------------------------------------------------------------------------------------------------------------------------|----------------------|
| GOTERM_MF_DIRECT | GO:0098641~cadherin binding involved in cell-c | 94    | 8.49141824751581 | 2.16863644141276E-51 | Q61510, O70456, Q62448, P70460, O08709, P19096, Q9Z0P5, Q8BTM8, Q61792, Q62167, Q6PAR5, Q8CBW3, Q80U87, P42225, Q9JHJ0, Q91VX2, Q60902, P47753, Q5FWK3, P61027, P25444, P07356, P84228, Q6Y7W8, Q9Z0U1, Q8BH43, Q8BK64, P51432, P24452, P30999, Q99LX0, Q62418, Q9CPV4, P11499, Q6NZJ6, Q8VDJ3, P57776, Q9QXS1, Q61166, P54823, Q9DBG5, P42932, Q9CWK8, E9PVA8, O88844, Q9JLQ0, P05064, P47226, Q922Q8, P60229, P62962, Q9WVA4, Q8BVY0, Q9Z0N1, Q6ZQ58, Q78PY7, Q62261, Q9JKF1, P59325, Q7TQH0, Q99K01, P42567, Q9CWJ9, P63101, A2AGT5, Q8VDD5, P68433, P62855, O54988, P42208, Q8K298, Q2L4X1, P62259, Q80UG5, P26039, Q8R1F1, Q9Z0G0, Q3UZ39, Q9CQV8, Q8CI51, Q9D8N0, Q9CZ30, Q9EQP2, O08579, Q3UEB3, P35700, Q62433, P60122, P58252, P17182, P22682, Q9WUA3, Q8CIN4, Q9D0I9         | 1.12010072198969E-48 |
| GOTERM_CC_DIRECT | GO:0005913~cell-cell adherens junction         | 95    | 8.58175248419151 | 1.74539240811561E-50 | Q62523, Q61510, O70456, Q62448, P70460, O08709, P19096, Q9Z0P5, Q8BTM8, Q61792, Q62167, Q6PAR5, Q8CBW3, Q80U87, P42225, Q9JHJ0, Q91VX2, Q60902, P47753, Q5FWK3, P61027, P25444, P07356, P84228, Q6Y7W8, Q9Z0U1, Q8BH43, Q8BK64, P51432, P24452, P30999, Q99LX0, Q62418, Q9CPV4, P11499, Q6NZJ6, Q8VDJ3, P57776, Q9QXS1, Q61166, P54823, Q9DBG5, P42932, Q9CWK8, E9PVA8, O88844, Q9JLQ0, P05064, P47226, Q922Q8, P60229, P62962, Q9WVA4, Q8BVY0, Q9Z0N1, Q6ZQ58, Q78PY7, Q62261, Q9JKF1, P59325, Q7TQH0, Q99K01, P42567, Q9CWJ9, P63101, A2AGT5, Q8VDD5, P68433, P62855, O54988, P42208, Q8K298, Q2L4X1, P62259, Q80UG5, P26039, Q8R1F1, Q9Z0G0, Q3UZ39, Q9CQV8, Q8CI51, Q9D8N0, Q9CZ30, Q9EQP2, O08579, Q3UEB3, P35700, Q62433, P60122, P58252, P17182, P22682, Q9WUA3, Q8CIN4, Q9D0I9 | 2.4260954472807E-48  |
| GOTERM_BP_DIRECT | GO:0098609~cell-cell adhesion                  | 68    | 6.14272809394761 | 5.44736759603533E-40 | O70456, Q62448, P70460, O08709, Q9Z0P5, Q61792, Q6PAR5, Q8CBW3, Q80U87, P42225, Q91VX2, Q60902, P47753, Q5FWK3, P61027, P25444, P84228, Q6Y7W8, Q8BH43, Q8BK64, P51432, P24452, Q62418, Q9CPV4, Q6NZJ6, Q8VDJ3, P57776, Q9QXS1, P54823, Q9DBG5, O88844, P05064, P47226, Q922Q8, P60229, Q9WVA4, Q9Z0N1, Q6ZQ58, Q78PY7, P59325, Q7TQH0, Q99K01, P42567, Q9CWJ9, P63101, A2AGT5, P68433, P62855, O54988, P42208, Q8K298, Q2L4X1, P26039, Q8R1F1, Q9Z0G0, Q3UZ39, Q9CQV8, Q8CI51, Q9D8N0, Q9CZ30, Q9EQP2, O08579, Q3UEB3, P35700, Q62433, P17182, Q9WUA3, Q9D0I9                                                                                                                                                                                                                         | 1.52144976957267E-36 |

**Annotation Cluster 2** Enrichment Score: 27.280182377808515

| Category | Term | Count | % | PValue | Genes | FDR |
|----------|------|-------|---|--------|-------|-----|
|----------|------|-------|---|--------|-------|-----|

|             |                    |     |                  |                      |                                                                                                                                                                                                                                                                                                                                                                                                                                                                                                                                                                                                                                                                                                                                                                                                                                                                                                                                                                                                                                                                                                                                                                                                                                                                                                                                                                                                                                                                                                                                                                                                                                                                                                                                                                                                                                                                                                                                                                                                                                                                                                                                                                                                                                                                                                                                                                                                                                                                                                                                                                                                                                                                                                                                                                                                                                                                                                     |                      |
|-------------|--------------------|-----|------------------|----------------------|-----------------------------------------------------------------------------------------------------------------------------------------------------------------------------------------------------------------------------------------------------------------------------------------------------------------------------------------------------------------------------------------------------------------------------------------------------------------------------------------------------------------------------------------------------------------------------------------------------------------------------------------------------------------------------------------------------------------------------------------------------------------------------------------------------------------------------------------------------------------------------------------------------------------------------------------------------------------------------------------------------------------------------------------------------------------------------------------------------------------------------------------------------------------------------------------------------------------------------------------------------------------------------------------------------------------------------------------------------------------------------------------------------------------------------------------------------------------------------------------------------------------------------------------------------------------------------------------------------------------------------------------------------------------------------------------------------------------------------------------------------------------------------------------------------------------------------------------------------------------------------------------------------------------------------------------------------------------------------------------------------------------------------------------------------------------------------------------------------------------------------------------------------------------------------------------------------------------------------------------------------------------------------------------------------------------------------------------------------------------------------------------------------------------------------------------------------------------------------------------------------------------------------------------------------------------------------------------------------------------------------------------------------------------------------------------------------------------------------------------------------------------------------------------------------------------------------------------------------------------------------------------------------|----------------------|
| UP_KEYWORDS | Nucleotide-binding | 195 | 17.6151761517615 | 6.04867185025301E-39 | <p>Q9JMH9, Q61316, Q62407, Q9CZW4, Q9WTP7, P11440, Q8BML9, Q9JLV6, P16460, Q6P9R2, P61027, P49138, P46664, P56480, P47758, Q569Z6, Q9DBC7, P18654, Q91VC3, Q8K183, O88685, P32921, Q6P9P6, Q61655, Q6P3D0, Q91VR5, Q9Z255, Q80X41, P62254, P61161, Q9CZD3, Q8BMJ2, P47857, Q8CFI2, Q9CZ30, P32233, Q9D2R0, Q64261, Q99LE6, Q8CIN4, P07742, Q8C0C7, B2RQC6, P46471, Q9D2Y4, Q8VE47, P61222, Q9JHR7, P46467, P05132, P41216, P49615, P97310, Q3TRM8, P97311, P70296, P11499, Q9WTM5, O08638, Q9Z2A0, Q6NVF4, P54823, Q8R050, Q68FH4, Q8BP47, Q9QXG4, Q61699, Q9Z0N1, Q91YL3, O70551, P31750, P49718, P49717, Q9QZL0, O54984, Q03963, O54988, P62334, P53994, P80315, P80314, P80313, Q9Z1Q9, Q60931, Q64737, Q9EQP2, Q3THK7, Q3UM18, Q9D0R2, Q9WUA2, Q6URW6, Q9WUA3, P80318, P80317, Q8BGQ7, P80316, Q8K1R7, Q8CG48, Q6NZQ2, Q5U3K5, Q9DBL7, Q922B2, Q61035, P68181, Q61036, Q8C878, P12382, Q9EPU0, P62196, Q05D44, P25206, P09411, Q8BU30, Q9QXB9, Q03265, Q9WUK4, Q9ER72, Q02053, P84096, Q68FL6, Q9JHU4, Q9R1T4, Q5SUR0, Q8CGC7, Q8VDD5, Q91V92, Q9JJ78, P04184, P26638, P42208, Q80UG5, Q7TSS2, Q3V1L4, P97855, Q3V300, Q3UDE2, O54950, P60122, P33174, Q04447, Q9D1G2, Q8BH69, Q3UFY7, P54775, P97386, Q922F4, Q69ZS7, Q61879, Q07832, P30285, P37913, Q9CS42, Q62167, Q3THS6, Q9Z1F9, P62835, Q8R1Q8, Q8CFV9, Q9WV85, Q91WQ3, P61082, P70698, Q61881, P70218, P42932, P61750, P28740, Q9R0N0, P11983, P50516, P59325, P70248, Q922D8, Q9JM14, Q04899, P61087, Q9QUJ7, Q9D7H3, O35626, P36916, P97494, Q9ESL4, A2BDX3, E9Q4Z2, P97930, P51855, P63280, P62192, Q99M31, O08810, Q9D892, P58252, P51859, Q6P542, Q9D0I9</p> <p>Q9JMH9, Q8K1R7, Q8CG48, Q6NZQ2, Q61316, Q62407, Q9CZW4, Q9DBL7, Q922B2, P11440, Q61035, P68181, Q61036, Q8C878, P12382, Q9EPU0, Q8BML9, Q9JLV6, P16460, P62196, P25206, Q6P9R2, P09411, P49138, Q8BU30, P56480, Q569Z6, Q03265, Q9WUK4, Q9ER72, P18654, Q91VC3, Q02053, Q68FL6, Q8K183, O88685, Q9JHU4, P32921, Q61655, Q6P9P6, Q91VR5, Q9Z255, Q80X41, Q5SUR0, P62254, P61161, Q8CGC7, Q8VDD5, Q9CZD3, Q91V92, Q8BMJ2, Q9JJ78, P04184, P26638, P47857, Q8CFI2, Q7TSS2, Q9CZ30, P97855, Q9D2R0, Q3V300, Q3UDE2, O54950, P60122, P33174, Q64261, Q04447, Q99LE6, Q9D1G2, Q8BH69, Q8CIN4, P07742, P54775, P97386, Q8C0C7, B2RQC6, P46471, Q9Z1F9, Q3THS6, P46467, P05132, P41216, P49615, Q8R1Q8, Q8CFV9, Q9WV85, Q91WQ3, P97310, P97311, Q3TRM8, P70296, P11499, Q9WTM5, O08638, Q9Z2A0, P61082, Q61881, P70698, Q6NVF4, P54823, P70218, P42932, Q68FH4, Q8BP47, Q9QXG4, Q61699, P28740, Q91YL3, O70551, Q9R0N0, P11983, P50516, P70248, P31750, Q922D8, P49718, P49717, Q9QZL0, O54984, Q04899, Q03963, P61087, Q9QUJ7, O54988, P62334, Q9D7H3, P80315, P97494, P80314, Q9Z1Q9, Q9ESL4, P80313, A2BDX3, Q64737, E9Q4Z2, P97930, P51855, P63280, Q9EQP2, P62192, Q99M31, Q3THK7, Q9D0R2, Q9WUA2, Q6URW6, Q9WUA3, P80318, P80317, Q6P542, Q8BGQ7, Q9D0I9, P80316</p> | 3.87114998416193E-37 |
| UP_KEYWORDS | ATP-binding        | 162 | 14.6341463414634 | 2.05120488701444E-35 | <p>Q9JMH9, Q61316, Q62407, Q9CZW4, Q9WTP7, P11440, Q8BML9, Q9JLV6, P16460, Q6P9R2, P61027, P49138, P46664, P56480, P47758, Q569Z6, Q9DBC7, P18654, Q91VC3, Q8K183, O88685, P32921, Q6P9P6, Q61655, Q6P3D0, Q91VR5, Q9Z255, Q80X41, P62254, P61161, Q9CZD3, Q8BMJ2, P47857, Q8CFI2, Q9CZ30, P32233, Q9D2R0, Q64261, Q99LE6, Q8CIN4, P07742, Q8C0C7, B2RQC6, P46471, Q9D2Y4, Q8VE47, P61222, Q9JHR7, P46467, P05132, P41216, P49615, P97310, Q3TRM8, P97311, P70296, P11499, Q9WTM5, O08638, Q9Z2A0, Q6NVF4, P54823, Q8R050, Q68FH4, Q8BP47, Q9QXG4, Q61699, Q9Z0N1, Q91YL3, O70551, P31750, P49718, P49717, Q9QZL0, O54984, Q03963, O54988, P62334, P53994, P80315, P80314, P80313, Q9Z1Q9, Q60931, Q64737, Q9EQP2, Q3THK7, Q3UM18, Q9D0R2, Q9WUA2, Q6URW6, Q9WUA3, P80318, P80317, Q8BGQ7, P80316, Q8K1R7, Q8CG48, Q6NZQ2, Q5U3K5, Q9DBL7, Q922B2, Q61035, P68181, Q61036, Q8C878, P12382, Q9EPU0, P62196, Q05D44, P25206, P09411, Q8BU30, Q9QXB9, Q03265, Q9WUK4, Q9ER72, Q02053, P84096, Q68FL6, Q9JHU4, Q9R1T4, Q5SUR0, Q8CGC7, Q8VDD5, Q91V92, Q9JJ78, P04184, P26638, P42208, Q80UG5, Q7TSS2, Q3V1L4, P97855, Q3V300, Q3UDE2, O54950, P60122, P33174, Q04447, Q9D1G2, Q8BH69, Q3UFY7, P54775, P97386, Q922F4, Q69ZS7, Q61879, Q07832, P30285, P37913, Q9CS42, Q62167, Q3THS6, Q9Z1F9, P62835, Q8R1Q8, Q8CFV9, Q9WV85, Q91WQ3, P61082, P70698, Q61881, P70218, P42932, P61750, P28740, Q9R0N0, P11983, P50516, P59325, P70248, Q922D8, Q9JM14, Q04899, P61087, Q9QUJ7, Q9D7H3, O35626, P36916, P97494, Q9ESL4, A2BDX3, E9Q4Z2, P97930, P51855, P63280, P62192, Q99M31, O08810, Q9D892, P58252, P51859, Q6P542, Q9D0I9</p> <p>Q9JMH9, Q8K1R7, Q8CG48, Q6NZQ2, Q61316, Q62407, Q9CZW4, Q9DBL7, Q922B2, P11440, Q61035, P68181, Q61036, Q8C878, P12382, Q9EPU0, Q8BML9, Q9JLV6, P16460, P62196, P25206, Q6P9R2, P09411, P49138, Q8BU30, P56480, Q569Z6, Q03265, Q9WUK4, Q9ER72, P18654, Q91VC3, Q02053, Q68FL6, Q8K183, O88685, Q9JHU4, P32921, Q61655, Q6P9P6, Q91VR5, Q9Z255, Q80X41, Q5SUR0, P62254, P61161, Q8CGC7, Q8VDD5, Q9CZD3, Q91V92, Q8BMJ2, Q9JJ78, P04184, P26638, P47857, Q8CFI2, Q7TSS2, Q9CZ30, P97855, Q9D2R0, Q3V300, Q3UDE2, O54950, P60122, P33174, Q64261, Q04447, Q99LE6, Q9D1G2, Q8BH69, Q8CIN4, P07742, P54775, P97386, Q8C0C7, B2RQC6, P46471, Q9Z1F9, Q3THS6, P46467, P05132, P41216, P49615, Q8R1Q8, Q8CFV9, Q9WV85, Q91WQ3, P97310, P97311, Q3TRM8, P70296, P11499, Q9WTM5, O08638, Q9Z2A0, P61082, Q61881, P70698, Q6NVF4, P54823, P70218, P42932, Q68FH4, Q8BP47, Q9QXG4, Q61699, P28740, Q91YL3, O70551, Q9R0N0, P11983, P50516, P70248, P31750, Q922D8, P49718, P49717, Q9QZL0, O54984, Q04899, Q03963, P61087, Q9QUJ7, O54988, P62334, Q9D7H3, P80315, P97494, P80314, Q9Z1Q9, Q9ESL4, P80313, A2BDX3, Q64737, E9Q4Z2, P97930, P51855, P63280, Q9EQP2, P62192, Q99M31, Q3THK7, Q9D0R2, Q9WUA2, Q6URW6, Q9WUA3, P80318, P80317, Q6P542, Q8BGQ7, Q9D0I9, P80316</p> | 1.05021690215139E-33 |

|                                                        |     |                  |                      |                                                                                                                                                                                                                                                                                                                                                                                                                                                                                                                                                                                                                                                                                                                                                                                                                                                                                                                                                                                                                                                                                                                                                                                                                                                                                                                                                                                                                                                                                                                                                                                                                                                                                                                                                                                                                                                                                                                                                                                                                                                                                                                                                                                                                                                                                                                                                                                                                                                                                                                                                                                                                                                                                                                                                                                                                                                                                                                                                                                                                                                                                                                                                                                                             |                      |
|--------------------------------------------------------|-----|------------------|----------------------|-------------------------------------------------------------------------------------------------------------------------------------------------------------------------------------------------------------------------------------------------------------------------------------------------------------------------------------------------------------------------------------------------------------------------------------------------------------------------------------------------------------------------------------------------------------------------------------------------------------------------------------------------------------------------------------------------------------------------------------------------------------------------------------------------------------------------------------------------------------------------------------------------------------------------------------------------------------------------------------------------------------------------------------------------------------------------------------------------------------------------------------------------------------------------------------------------------------------------------------------------------------------------------------------------------------------------------------------------------------------------------------------------------------------------------------------------------------------------------------------------------------------------------------------------------------------------------------------------------------------------------------------------------------------------------------------------------------------------------------------------------------------------------------------------------------------------------------------------------------------------------------------------------------------------------------------------------------------------------------------------------------------------------------------------------------------------------------------------------------------------------------------------------------------------------------------------------------------------------------------------------------------------------------------------------------------------------------------------------------------------------------------------------------------------------------------------------------------------------------------------------------------------------------------------------------------------------------------------------------------------------------------------------------------------------------------------------------------------------------------------------------------------------------------------------------------------------------------------------------------------------------------------------------------------------------------------------------------------------------------------------------------------------------------------------------------------------------------------------------------------------------------------------------------------------------------------------------|----------------------|
| GOTERM_MF_DIRECTGO:0000166~nucleotide binding          | 215 | 19.4218608852755 | 2.19856190045985E-30 | <p>Q9JMH9, Q61316, Q62407, Q9CZW4, Q9WTP7, P11440, Q9JLV6, P16460, Q6P9R2, P61027, P49138, P46664, P56480, P47758, Q569Z6, Q9DBC7, P18654, Q8K183, O88685, P32921, Q91WT8, Q6P9P6, Q61655, Q6P3D0, Q91VR5, Q9Z255, Q80X41, Q99K48, Q9Z1D1, Q62189, P62254, P61161, Q9CZD3, Q8BMJ2, P47857, Q8CFI2, Q9CZ30, P32233, Q9D2R0, O08583, Q64261, Q8R4X3, Q99LE6, Q8CIN4, P07742, Q8C0C7, B2RQC6, P46471, Q9D2Y4, P32067, Q8VE47, P61222, Q9JHR7, P46467, P05132, P41216, P49615, P97310, Q3TRM8, P97311, P29341, Q9JLH8, P70296, P11499, Q9WTM5, O08638, Q9Z2A0, Q6A0A2, Q6NVF4, P54823, Q8R050, Q68FH4, Q8BP47, Q9QXG4, Q61699, Q9Z0N1, Q91YL3, O70551, Q9CY64, P31750, P49718, P49717, Q8VIJ6, Q9QZL0, O54984, Q03963, O54988, P62334, P53994, P80315, P80314, P80313, Q9Z1Q9, Q60931, Q64737, Q9EQP2, Q3THK7, Q3UEB3, Q3UM18, Q9D0R2, Q9WUA2, Q6URW6, P24547, Q9WUA3, P80318, P80317, Q8BGQ7, P80316, Q8K1R7, Q8CG48, Q6NZQ2, Q5U3K5, Q9DBL7, Q922B2, Q9D883, Q61035, P68181, Q61036, Q8C878, P12382, Q9EPU0, P62196, Q05D44, P25206, Q8BU30, Q9QXB9, Q03265, Q9WUK4, Q9ER72, Q02053, P84096, Q68FL6, Q9JHU4, Q9CX86, Q9R1T4, Q5SUR0, Q8CGC7, Q8VDD5, Q91V92, Q6NVF9, Q9JJ78, P04184, P26638, P42208, O35309, Q80UG5, Q7TSS2, Q3V1L4, P97855, Q8BGD9, Q3V300, Q3UDE2, O54950, P60122, P33174, Q04447, Q8C166, Q9D1G2, Q8BH69, Q3UFY7, Q9CQI7, P54775, P97386, Q922F4, Q69ZS7, Q61879, Q07832, P30285, P37913, Q9CS42, Q62167, Q3THS6, Q9Z1F9, P62835, Q8R1Q8, Q8CFV9, Q9WV85, Q91WQ3, Q9CPN8, P61082, P70698, Q61881, P70218, P42932, P61750, P28740, Q9R0N0, P11983, P50516, P59325, P70248, Q922D8, Q9JM14, Q04899, P61087, Q9QUJ7, Q9D7H3, O35626, P36916, P97494, Q9ESL4, A2BDX3, P97379, E9Q4Z2, P97930, P51855, P63280, P62192, Q99M31, O08810, Q9D892, P58252, P51859, Q6P542, Q9D0I9</p> <p>Q9JMH9, Q8K1R7, Q8CG48, Q6NZQ2, Q61316, Q9Z0P5, Q62407, Q9CZW4, Q9WTP7, Q9DBL7, Q922B2, P11440, Q61035, P68181, Q61036, Q8C878, P12382, Q9EPU0, Q8BML9, Q9JLV6, P16460, P62196, P25206, Q6P9R2, P09411, P49138, Q8BU30, P56480, Q569Z6, Q03265, Q9WUK4, Q9ER72, P18654, Q91VC3, Q02053, Q68FL6, Q8K183, O88685, Q9JHU4, P32921, Q9CXY6, Q61655, Q6P9P6, Q91VR5, Q9Z255, Q80X41, Q5SUR0, P62254, P61161, Q8CGC7, Q8VDD5, Q9CZD3, Q91V92, Q8BMJ2, Q9JJ78, P04184, P26638, P62814, P47857, Q8CFI2, Q7TSS2, Q9CZ30, P97855, Q9D2R0, Q3V300, Q3UDE2, O54950, P60122, P33174, Q64261, Q04447, Q9DBQ7, Q99LE6, Q9D1G2, Q8BH69, Q8CIN4, P07742, P54775, P97386, Q8C0C7, B2RQC6, P46471, Q61879, Q07832, P30285, Q9D2Y4, P37913, Q8VE47, Q9CS42, Q62167, P61222, Q9JHR7, Q9Z1F9, Q3THS6, P46467, P05132, P41216, P49615, Q8R1Q8, Q8CFV9, Q9WV85, Q91WQ3, P97310, P97311, Q3TRM8, P70296, P11499, Q9WTM5, O08638, Q9Z2A0, P61082, Q61881, P70698, Q6NVF4, P54823, P70218, P42932, Q68FH4, Q8BP47, Q9QXG4, Q61699, P28740, Q91YL3, O70551, Q9ERS2, Q9R0N0, P11983, P50516, P70248, P31750, Q922D8, P49718, P49717, Q9QZL0, O54984, Q04899, Q03963, P61087, Q9QUJ7, P82343, O54988, P62334, Q9D7H3, P80315, P97494, P80314, Q9Z1Q9, Q9ESL4, P80313, A2BDX3, Q64737, E9Q4Z2, P97930, P51855, P63280, Q9EQP2, P62192, Q99M31, Q3THK7, Q9D0R2, Q9WUA2, Q6URW6, Q9WUA3, P80318, P80317, Q6P542, Q8BGQ7, Q9D0I9, P80316</p> | 7.57038147725007E-28 |
| GOTERM_MF_DIRECTGO:0005524~ATP binding                 | 169 | 15.2664859981933 | 6.83623506904534E-24 | <p>Q9JMH9, Q8K1R7, Q8CG48, Q6NZQ2, Q61316, Q9Z0P5, Q62407, Q9CZW4, Q9WTP7, Q9DBL7, Q922B2, P11440, Q61035, P68181, Q61036, Q8C878, P12382, Q9EPU0, Q8BML9, Q9JLV6, P16460, P62196, P25206, Q6P9R2, P09411, P49138, Q8BU30, P56480, Q569Z6, Q03265, Q9WUK4, Q9ER72, P18654, Q91VC3, Q02053, Q68FL6, Q8K183, O88685, Q9JHU4, P32921, Q9CXY6, Q61655, Q6P9P6, Q91VR5, Q9Z255, Q80X41, Q5SUR0, P62254, P61161, Q8CGC7, Q8VDD5, Q9CZD3, Q91V92, Q8BMJ2, Q9JJ78, P04184, P26638, P62814, P47857, Q8CFI2, Q7TSS2, Q9CZ30, P97855, Q9D2R0, Q3V300, Q3UDE2, O54950, P60122, P33174, Q64261, Q04447, Q9DBQ7, Q99LE6, Q9D1G2, Q8BH69, Q8CIN4, P07742, P54775, P97386, Q8C0C7, B2RQC6, P46471, Q61879, Q07832, P30285, Q9D2Y4, P37913, Q8VE47, Q9CS42, Q62167, P61222, Q9JHR7, Q9Z1F9, Q3THS6, P46467, P05132, P41216, P49615, Q8R1Q8, Q8CFV9, Q9WV85, Q91WQ3, P97310, P97311, Q3TRM8, P70296, P11499, Q9WTM5, O08638, Q9Z2A0, P61082, Q61881, P70698, Q6NVF4, P54823, P70218, P42932, Q68FH4, Q8BP47, Q9QXG4, Q61699, P28740, Q91YL3, O70551, Q9ERS2, Q9R0N0, P11983, P50516, P70248, P31750, Q922D8, P49718, P49717, Q9QZL0, O54984, Q04899, Q03963, P61087, Q9QUJ7, P82343, O54988, P62334, Q9D7H3, P80315, P97494, P80314, Q9Z1Q9, Q9ESL4, P80313, A2BDX3, Q64737, E9Q4Z2, P97930, P51855, P63280, Q9EQP2, P62192, Q99M31, Q3THK7, Q9D0R2, Q9WUA2, Q6URW6, Q9WUA3, P80318, P80317, Q6P542, Q8BGQ7, Q9D0I9, P80316</p> <p>Q9JMH9, Q8K1R7, Q8CG48, Q62407, Q9DBL7, P11440, P68181, Q61036, Q8C878, P12382, Q9EPU0, Q9JLV6, P16460, P62196, P25206, Q6P9R2, P09411, P49138, P56480, Q569Z6, Q03265, Q9WUK4, P18654, Q91VC3, Q02053, Q8K183, O88685, Q9JHU4, Q61655, Q6P9P6, Q91VR5, Q80X41, Q5SUR0, P61161, Q8CGC7, Q8VDD5, Q9CZD3, Q91V92, Q8BMJ2, Q9JJ78, P04184, P26638, P47857, Q9CZ30, Q3V300, P60122, P33174, Q64261, Q04447, Q9D1G2, Q8BH69, Q8CIN4, P54775, P46471, Q61879, Q07832, P30285, Q9CS42, Q62167, Q9Z1F9, Q3THS6, P46467, P05132, P49615, Q8R1Q8, P97310, P97311, Q3TRM8, Q9WTM5, O08638, Q9Z2A0, Q61881, P54823, P70218, Q68FH4, P28740, Q91YL3, O70551, Q9R0N0, P50516, P70248, P31750, Q922D8, P49718, P49717, Q9QZL0, O54984, Q04899, Q03963, O54988, P62334, Q9ESL4, Q64737, P97930, P51855, Q9EQP2, P62192, Q3THK7, Q6URW6, Q9WUA3</p>                                                                                                                                                                                                                                                                                                                                                                                                                                                                                                                                                                                                                                                                                                                                                                                                                                                                                                                                                         | 1.76545770658096E-21 |
| UP_SEQ_FEATURE nucleotide phosphate-binding region:ATP | 99  | 8.94308943089431 | 2.13041081869451E-11 | <p>Q9JMH9, Q8K1R7, Q8CG48, Q62407, Q9DBL7, P11440, P68181, Q61036, Q8C878, P12382, Q9EPU0, Q9JLV6, P16460, P62196, P25206, Q6P9R2, P09411, P49138, P56480, Q569Z6, Q03265, Q9WUK4, P18654, Q91VC3, Q02053, Q8K183, O88685, Q9JHU4, Q61655, Q6P9P6, Q91VR5, Q80X41, Q5SUR0, P61161, Q8CGC7, Q8VDD5, Q9CZD3, Q91V92, Q9JJ78, P04184, P26638, P47857, Q9CZ30, Q3V300, P60122, P33174, Q64261, Q04447, Q9D1G2, Q8BH69, Q8CIN4, P54775, P46471, Q61879, Q07832, P30285, Q9CS42, Q62167, Q9Z1F9, Q3THS6, P46467, P05132, P49615, Q8R1Q8, P97310, P97311, Q3TRM8, Q9WTM5, O08638, Q9Z2A0, Q61881, P54823, P70218, Q68FH4, P28740, Q91YL3, O70551, Q9R0N0, P50516, P70248, P31750, Q922D8, P49718, P49717, Q9QZL0, O54984, Q04899, Q03963, O54988, P62334, Q9ESL4, Q64737, P97930, P51855, Q9EQP2, P62192, Q3THK7, Q6URW6, Q9WUA3</p>                                                                                                                                                                                                                                                                                                                                                                                                                                                                                                                                                                                                                                                                                                                                                                                                                                                                                                                                                                                                                                                                                                                                                                                                                                                                                                                                                                                                                                                                                                                                                                                                                                                                                                                                                                                                                                                                                                                                                                                                                                                                                                                                                                                                                                                                                                                                                                               | 4.82325009352436E-08 |

**Annotation Cluster 3** Enrichment Score: 16.29908469535427  
Category Term

Count % PValue Genes

FDR

|                                                         |                                       |    |                 |                      |                                                                                                                                                                                                                                                                |                      |
|---------------------------------------------------------|---------------------------------------|----|-----------------|----------------------|----------------------------------------------------------------------------------------------------------------------------------------------------------------------------------------------------------------------------------------------------------------|----------------------|
| UP_KEYWORDS                                             | Proteasome                            | 30 | 2.710027100271  | 9.27817869827467E-20 | Q9D8W5, P54775, P46471, O35593, Q9R1P1, Q9WUP7, P28063, Q9R1P4, Q9CR00, P61290, O35522, O35226, P62196, Q9Z2U1, P26516, P62334, Q9Z2U0, O09061, P97371, P97372, Q3TXS7, Q9CX56, Q9JMA1, P70195, P62192, P54726, Q99JI4, Q9QUM9, O88685, Q8R317                 | 2.96901718344789E-24 |
| GOTERM_CC_DIRECTGO:000502~proteasome complex            |                                       | 33 | 2.9810298102981 | 1.30445454817763E-23 | Q9D8W5, P54775, P46471, O35593, Q9R1P1, Q9WUP7, P28063, Q9R1P4, Q9CR00, P61290, Q9CZH3, O35522, O35226, P62196, Q9Z2U1, P26516, P62334, Q9Z2U0, O09061, P97371, P97372, Q3TXS7, Q9CX56, Q9JMA1, P70195, P62192, P54726, Q99JI4, Q9QUM9, O88685, Q8R317, Q9Z2X2 | 1.20879454797794E-23 |
| KEGG_PATHWAY                                            | mmu03050:Proteasome                   | 25 | 2.2583559168925 | 6.90935237846467E-17 | Q9D8W5, P54775, P46471, O35593, Q9R1P1, P28063, Q9R1P4, P61290, O35522, O35226, P62196, Q9Z2U1, P26516, P62334, Q9Z2U0, O09061, P97371, P97372, Q3TXS7, Q9CX56, P70195, P62192, Q99JI4, Q9QUM9, O88685                                                         | 1.55460428515455E-14 |
| GOTERM_CC_DIRECTGO:0022624~proteasome accessory complex |                                       | 13 | 1.1743450767841 | 4.04868445696203E-13 | Q9D8W5, P54775, Q3TXS7, P46471, Q9CX56, O35593, P62192, Q8BJY1, Q99JI4, O35226, P62196, O88685, P62334                                                                                                                                                         | 1.73159119851607E-11 |
| KEGG_PATHWAY                                            | mmu05169:Epstein-Barr virus infection | 21 | 1.8970189701897 | 0.000943916475104    | Q9D8W5, P54775, Q3TXS7, P46471, Q9CX56, P26450, P24063, O35593, P62192, P31750, Q04207, Q99JI4, O35226, P01902, Q03963, P62196, O88685, P20152, P26516, P62334, P42227                                                                                         | 0.013273825431148    |

**Annotation Cluster 4** Enrichment Score: 10.521792819915726

| Category                                          | Term          | Count | %                | PValue               | Genes                                                                                                                                                                                                                                                                                                                                                                                                  | FDR                  |
|---------------------------------------------------|---------------|-------|------------------|----------------------|--------------------------------------------------------------------------------------------------------------------------------------------------------------------------------------------------------------------------------------------------------------------------------------------------------------------------------------------------------------------------------------------------------|----------------------|
| UP_KEYWORDS                                       | Actin-binding | 41    | 3.7037037037037  | 1.82813309497347E-13 | O89053, Q7TPR4, P70460, Q61879, Q9Z0P5, Q62261, Q8BTM8, Q61792, P70248, P40124, P61161, Q9JHJ0, P21107, Q7TMB8, Q8VDD5, Q8R1S4, Q9CVB6, Q9JM76, P47753, P47754, Q8K298, Q8BQ30, Q99K51, Q8BH43, P24452, Q8VD75, O70200, Q62418, O08638, Q9WUM4, Q9D2V7, Q9QXS1, O08579, Q9JJ28, P13020, P57780, Q6URW6, Q6IRU2, Q9CQI6, O88342, P62962                                                                 | 3.12001381542139E-12 |
| GOTERM_MF_DIRECTGO:0003779~actin binding          |               | 49    | 4.42637759710931 | 7.83340968413688E-11 | P70460, Q61879, Q9Z0P5, Q8BTM8, Q71LX4, Q61792, P40124, Q9JHJ0, Q7TMB8, Q9CVB6, Q9JM76, P47753, P47754, P61982, Q8BQ30, Q99K51, Q8BH43, P24452, O70200, Q62418, O08638, Q9QXS1, P57780, Q6IRU2, P62962, O89053, Q7TPR4, Q62261, P70248, P61161, P21107, Q8VDD5, Q8R1S4, P68510, Q8K298, P26039, Q9Z0G0, Q8CI51, Q8VD75, Q9WUM4, Q9D2V7, P97814, O08579, P70315, Q9JJ28, P13020, Q6URW6, Q9CQI6, O88342 | 8.93647143160808E-09 |
| GOTERM_MF_DIRECTGO:0051015~actin filament binding |               | 27    | 2.4390243902439  | 1.89960318408924E-09 | O89053, Q9JMH9, Q7TPR4, Q61879, Q8BTM8, Q71LX4, Q61792, P61161, Q7TMB8, Q8VDD5, Q8R1S4, Q9CVB6, Q9JM76, P47753, Q8C052, P26039, Q99K51, Q8VD75, O70200, Q62418, O08539, Q9WUM4, Q3UQ44, P58252, P57780, Q6URW6, O88342                                                                                                                                                                                 | 1.22643130572762E-07 |

**Annotation Cluster 5** Enrichment Score: 9.416796097645266

| Category                                            | Term      | Count | %               | PValue               | Genes                                                                                                                                                                                                                                                                                                                          | FDR                  |
|-----------------------------------------------------|-----------|-------|-----------------|----------------------|--------------------------------------------------------------------------------------------------------------------------------------------------------------------------------------------------------------------------------------------------------------------------------------------------------------------------------|----------------------|
| UP_KEYWORDS                                         | Chaperone | 40    | 3.613369467028  | 5.35455798797958E-17 | Q8BYA0, Q99L47, P11983, P97822, Q9CR00, Q9CZH3, P61222, Q61081, P62075, Q64152, P0C7N9, P80315, P80314, Q8BK64, P80313, P54103, P61759, Q99LX0, Q9CR16, Q9WU28, P11499, Q9EST4, P35564, Q9EST5, Q8BJY1, Q99M31, Q64378, O08997, P42932, Q9JK23, O08583, Q9CYG7, Q9CQI6, Q9CWM4, Q9QYI3, Q9D1E6, P80318, P80317, Q9Z2X2, P80316 | 1.14230570410231E-15 |
| GOTERM_BP_DIRECTGO:0006457~protein folding          |           | 24    | 2.1680216802168 | 5.32659974076987E-08 | Q8BYA0, Q62446, P80315, P80314, P10639, Q8BK64, P80313, P61759, Q9CR16, Q9WU28, Q99L47, P11983, P11499, P35564, Q64378, Q8R180, P42932, Q61081, Q9CWM4, Q8VBT0, P80318, Q8BGQ7, P80317, P80316                                                                                                                                 | 1.06265664828359E-05 |
| GOTERM_MF_DIRECTGO:0051082~unfolded protein binding |           | 15    | 1.3550135501355 | 1.96987204599351E-05 | P80315, P80314, P80313, Q9WU28, Q99L47, P11983, P11499, P35564, Q8BQM4, P42932, Q61081, Q9CWM4, P80318, P80317, P80316                                                                                                                                                                                                         | 0.000701682008107    |

**Annotation Cluster 6** Enrichment Score: 7.55458736277143

| Category | Term | Count | % | PValue | Genes | FDR |
|----------|------|-------|---|--------|-------|-----|
|----------|------|-------|---|--------|-------|-----|

|                                                                 |                                        |       |                  |                      |                                                                                                                                                                                                                                                                                                                                                                                                                                                                                                                                                                                                                                                                                                                                                                                                                                                                                                                                                                                                 |                      |
|-----------------------------------------------------------------|----------------------------------------|-------|------------------|----------------------|-------------------------------------------------------------------------------------------------------------------------------------------------------------------------------------------------------------------------------------------------------------------------------------------------------------------------------------------------------------------------------------------------------------------------------------------------------------------------------------------------------------------------------------------------------------------------------------------------------------------------------------------------------------------------------------------------------------------------------------------------------------------------------------------------------------------------------------------------------------------------------------------------------------------------------------------------------------------------------------------------|----------------------|
| UP_KEYWORDS                                                     | Protein transport                      | 64    | 5.78139114724481 | 1.46840068019253E-12 | P98078, Q8BUK6, Q9CR60, Q6P5F9, A2A5R2, P17427, P17426, Q8BKC5, Q6P8X1, Q91YE6, O35643, Q8CIE6, Q01405, P62075, Q64152, P63242, P61027, P22892, P46467, Q9CT10, Q9EPL8, Q9CR16, Q8BFY9, Q9CR95, Q8CI71, Q8V175, Q9CRA5, Q9CWK8, P61750, P57780, Q9QXK3, Q9D906, P52293, Q5XJY5, Q9ERK4, Q61655, Q9WU78, P61924, Q8C2E7, Q99MD9, P70168, Q9D662, P84091, Q64324, P42567, O35344, Q8BIJ7, P53994, Q9CWZ7, Q9EQH3, Q8R0H9, P26450, Q924C1, Q8BH60, P35585, Q9D2V7, Q3UM18, Q9QZ88, Q6PGL7, O88746, P60521, Q9CWU9, P40336, Q3UMB9                                                                                                                                                                                                                                                                                                                                                                                                                                                                  | 2.21123867134876E-11 |
| GOTERM_BP_DIRECTGO:0015031~                                     | protein transport                      | 67    | 6.05239385727191 | 2.84822070015513E-10 | P98078, Q8BUK6, Q9CR60, Q6P5F9, A2A5R2, P17427, P17426, Q8BKC5, Q6P8X1, Q91YE6, O35643, Q8CIE6, Q01405, P62075, Q64152, P63242, P61027, P62835, P22892, O88531, P46467, Q9CT10, Q9EPL8, Q9CR16, Q8BFY9, Q9CR95, Q8CI71, Q8V175, Q9CRA5, Q9CWK8, P61750, P57780, Q9QXK3, Q9D906, Q5XJY5, P50396, Q9ERK4, Q61655, Q9WU78, P61924, Q8C2E7, Q99MD9, P70168, Q9D662, P84091, Q64324, P42567, Q8VDD5, O35344, Q8BIJ7, P53994, Q9CWZ7, Q9EQH3, Q8R0H9, P26450, Q924C1, Q8BH60, P35585, Q9D2V7, Q3UM18, Q9QZ88, Q6PGL7, O88746, P60521, Q9CWU9, P40336, Q3UMB9                                                                                                                                                                                                                                                                                                                                                                                                                                          | 1.31896289996603E-07 |
| UP_KEYWORDS                                                     | Transport                              | 120   | 10.840108401084  | 1.86855313294063E-06 | P10639, Q8BVE3, Q3UBX0, Q8BUK6, Q9CR60, A2A5R2, Q61792, P17427, O08788, P17426, Q6P8X1, P63168, O35643, Q01405, P62075, Q64152, P61027, P48962, P56480, Q9CT10, Q9EPL8, Q62418, Q03265, Q8CI71, P53811, Q8V175, Q91VC3, P62482, Q9QXK3, Q9D906, P52293, Q9JHU4, Q5XJY5, P51881, Q61655, Q8R2E9, P70168, Q91WD5, P42567, P51807, Q8BIJ7, P56383, P62814, Q91VR2, Q8R0H9, P97855, Q8BH60, Q924C1, P35585, P31786, Q9QZ88, Q6PGL7, Q05816, O08583, Q3U0V1, P60521, Q9CWU9, Q9CQA1, P98078, P53564, Q6P5F9, Q8BKC5, Q62048, Q91YE6, Q8CIE6, P63242, Q9CZ13, P22892, P46467, Q9DB77, Q8R1Q8, Q9CPN8, Q9CR16, Q8BFY9, Q9CR95, Q8VVDJ3, Q9CQX2, Q8R180, O08997, Q9Z1G3, Q9CQ75, Q9DBG5, Q9CRA5, Q9CWK8, P61750, P57780, Q99LC3, Q9ERK4, P61924, Q9WU78, B2RXC1, Q8C2E7, Q99MD9, Q9ERS2, P50516, P31750, Q9D662, P84091, Q64324, O35344, P50518, O54984, Q9QYB1, Q91YT0, P53994, Q8VBT6, Q9CWZ7, Q9EQH3, Q60931, P26450, P97379, Q9D2V7, Q3UM18, Q9DC69, Q91VD9, O88746, Q8VBT0, P62627, P40336, Q3UMB9 | 1.49484250635251E-05 |
| GOTERM_BP_DIRECTGO:0006810~                                     | transport                              | 119   | 10.7497741644083 | 0.000773974908973    | P10639, Q8BVE3, Q3UBX0, Q8BUK6, Q9CR60, A2A5R2, Q61792, P17427, O08788, P17426, Q6P8X1, P63168, O35643, Q01405, P62075, Q64152, P61027, P48962, P56480, Q9CT10, Q9EPL8, Q62418, Q03265, Q8CI71, P53811, Q8V175, P62482, Q9QXK3, Q9D906, Q9JHU4, Q5XJY5, P51881, Q61655, Q8R2E9, P70168, Q91WD5, P42567, P51807, Q8BIJ7, P56383, P62814, Q91VR2, Q8R0H9, P97855, Q8BH60, Q924C1, P35585, P31786, Q9QZ88, Q6PGL7, Q05816, O08583, Q3U0V1, P60521, Q9CWU9, Q9CQA1, P98078, P53564, Q6P5F9, Q8BKC5, Q62048, Q91YE6, Q8CIE6, Q8BMP6, P63242, Q9CZ13, P22892, P46467, Q9DB77, Q8R1Q8, Q9CPN8, Q9CR16, Q8BFY9, Q9CR95, Q8VVDJ3, Q9CQX2, Q8R180, O08997, Q9Z1G3, Q9CQ75, Q9DBG5, Q9CRA5, Q9CWK8, P61750, P57780, Q99LC3, Q9ERK4, P61924, Q9WU78, B2RXC1, Q8C2E7, Q99MD9, P50516, P31750, Q9D662, P84091, Q64324, O35344, P50518, O54984, Q9QYB1, Q91YT0, P53994, Q8VBT6, Q9CWZ7, Q9EQH3, Q60931, P26450, P97379, Q9D2V7, Q3UM18, Q9DC69, Q91VD9, O09117, O88746, Q8VBT0, P62627, P40336, Q3UMB9         | 0.036028532012693    |
| <b>Annotation Cluster 7</b> Enrichment Score: 7.073032244597856 |                                        |       |                  |                      |                                                                                                                                                                                                                                                                                                                                                                                                                                                                                                                                                                                                                                                                                                                                                                                                                                                                                                                                                                                                 |                      |
| Category                                                        | Term                                   | Count | %                | PValue               | Genes                                                                                                                                                                                                                                                                                                                                                                                                                                                                                                                                                                                                                                                                                                                                                                                                                                                                                                                                                                                           | FDR                  |
| GOTERM_BP_DIRECTGO:0006413~                                     | translational initiation               | 23    | 2.0776874435411  | 1.87090046386024E-15 | Q62448, Q99JX4, Q6ZQ58, Q9Z0N1, Q99LC8, Q9DCH4, O70194, Q9Z1D1, Q99L45, Q6NZJ6, P59325, Q8R1B4, Q62167, Q8BGD9, P61222, Q8BMJ3, Q61749, Q05D44, P23116, Q8QZY1, P60229, Q80XI3, Q6P542                                                                                                                                                                                                                                                                                                                                                                                                                                                                                                                                                                                                                                                                                                                                                                                                          | 1.74180833185389E-12 |
| UP_KEYWORDS                                                     | Initiation factor                      | 20    | 1.806684733514   | 5.48662868294961E-12 | Q62448, Q99JX4, Q9Z0N1, Q99LC8, Q9DCH4, O70194, Q9Z1D1, Q99L45, Q6NZJ6, P59325, Q8R1B4, Q8BGD9, Q03963, Q8BMJ3, Q61749, Q05D44, P23116, Q8QZY1, P60229, Q80XI3                                                                                                                                                                                                                                                                                                                                                                                                                                                                                                                                                                                                                                                                                                                                                                                                                                  | 7.80320523797277E-11 |
| GOTERM_MF_DIRECTGO:0003743~                                     | translation initiation factor activity | 20    | 1.806684733514   | 5.97628309007059E-10 | Q62448, Q99JX4, Q9Z0N1, Q99LC8, Q9DCH4, O70194, Q9Z1D1, Q99L45, Q6NZJ6, P59325, Q8R1B4, Q8BGD9, Q03963, Q8BMJ3, Q61749, Q05D44, P23116, Q8QZY1, P60229, Q80XI3                                                                                                                                                                                                                                                                                                                                                                                                                                                                                                                                                                                                                                                                                                                                                                                                                                  | 4.74884648618686E-08 |
| GOTERM_CC_DIRECTGO:0005852~                                     | eukaryotic translation initiation fa   | 10    | 0.903342366757   | 7.40046438617221E-09 | Q99JX4, P61222, Q9DCH4, O70194, P23116, Q9Z1D1, Q8QZY1, Q8R1B4, P60229, Q62167                                                                                                                                                                                                                                                                                                                                                                                                                                                                                                                                                                                                                                                                                                                                                                                                                                                                                                                  | 2.28592122150653E-07 |

|                                                                         |                                                   |                 |                      |                                                                                                                                                                                                                                                |                                                                                                                                                                                                                                                                                                                                                                                                                        |                      |
|-------------------------------------------------------------------------|---------------------------------------------------|-----------------|----------------------|------------------------------------------------------------------------------------------------------------------------------------------------------------------------------------------------------------------------------------------------|------------------------------------------------------------------------------------------------------------------------------------------------------------------------------------------------------------------------------------------------------------------------------------------------------------------------------------------------------------------------------------------------------------------------|----------------------|
| GOTERM_BP_DIRECTGO:0001731~formation of translation preinitiation       | 12                                                | 1.0840108401084 | 8.30654457223654E-09 | Q99JX4, Q9Z0N1, Q9DCH4, O70194, P23116, Q9Z1D1, Q8QZY1, Q8R1B4, P59325, P25444, P60229, Q8BGD9                                                                                                                                                 | 2.32001789902567E-06                                                                                                                                                                                                                                                                                                                                                                                                   |                      |
| GOTERM_BP_DIRECTGO:0006446~regulation of translational initiation       | 13                                                | 1.1743450767841 | 2.31212299155308E-08 | Q62448, Q99JX4, Q99LC8, Q9DCH4, O70194, Q9Z1D1, Q6NZJ6, P59325, Q8R1B4, Q05D44, P23116, Q8QZY1, P60229                                                                                                                                         | 5.3814662628398E-06                                                                                                                                                                                                                                                                                                                                                                                                    |                      |
| GOTERM_CC_DIRECTGO:0016282~eukaryotic 43S preinitiation complex         | 8                                                 | 0.7226738934056 | 1.94526837063305E-06 | Q99JX4, Q9DCH4, O70194, P23116, Q9Z1D1, Q8QZY1, Q8R1B4, P60229                                                                                                                                                                                 | 3.8627471931142E-05                                                                                                                                                                                                                                                                                                                                                                                                    |                      |
| GOTERM_CC_DIRECTGO:0033290~eukaryotic 48S preinitiation complex         | 8                                                 | 0.7226738934056 | 1.94526837063305E-06 | Q99JX4, Q9DCH4, O70194, P23116, Q9Z1D1, Q8QZY1, Q8R1B4, P60229                                                                                                                                                                                 | 3.8627471931142E-05                                                                                                                                                                                                                                                                                                                                                                                                    |                      |
| KEGG_PATHWAY mmu03013:RNA transport                                     | 30                                                | 2.710027100271  | 4.0454306634531E-06  | Q62448, Q9Z0N1, O70194, Q9DCH4, Q9Z1D1, Q99L45, P59325, P70168, Q6P5F9, Q9EPU0, Q7TMB8, Q8CIG8, Q99JH1, Q8BMJ3, Q05D44, Q80XI3, Q99LC8, P29341, P63280, Q6NZJ6, Q924C1, Q8R1B4, Q61584, Q8BGD9, Q91VC3, O08583, Q61749, P23116, Q9CWU9, P60229 | 9.10221899276947E-05                                                                                                                                                                                                                                                                                                                                                                                                   |                      |
| GOTERM_CC_DIRECTGO:0071541~eukaryotic translation initiation factor     | 5                                                 | 0.4516711833785 | 0.000265541335547    | Q99JX4, Q9DCH4, O70194, P23116, Q8R1B4                                                                                                                                                                                                         | 0.002870849473813                                                                                                                                                                                                                                                                                                                                                                                                      |                      |
| GOTERM_BP_DIRECTGO:0075525~viral translational termination-reinitiation | 4                                                 | 0.3613369467028 | 0.001074077458913    | O70194, P23116, Q9Z1D1, Q8QZY1                                                                                                                                                                                                                 | 0.045453005193108                                                                                                                                                                                                                                                                                                                                                                                                      |                      |
| <b>Annotation Cluster 8</b>                                             | Enrichment Score: 7.0132568558682165              |                 |                      |                                                                                                                                                                                                                                                |                                                                                                                                                                                                                                                                                                                                                                                                                        |                      |
| Category                                                                | Term                                              | Count           | %                    | PValue                                                                                                                                                                                                                                         | Genes                                                                                                                                                                                                                                                                                                                                                                                                                  | FDR                  |
| SMART                                                                   | SM00088:PINT                                      | 9               | 0.8130081300813      | 5.30010575803517E-08                                                                                                                                                                                                                           | Q9D8W5, Q8BV13, Q99J14, Q99JX4, Q9CZ04, P23116, Q8R1B4, O88543, P60229                                                                                                                                                                                                                                                                                                                                                 | 1.44162876618557E-05 |
| UP_SEQ_FEATURE                                                          | domain:PCI                                        | 10              | 0.903342366757       | 1.22722798860304E-07                                                                                                                                                                                                                           | Q9D8W5, Q8VBV7, Q8BV13, Q99J14, Q99JX4, Q9CZ04, P23116, Q8R1B4, O88543, P60229                                                                                                                                                                                                                                                                                                                                         | 6.94611041549318E-05 |
| INTERPRO                                                                | IPR000717:Proteasome component (PCI) domain       | 9               | 0.8130081300813      | 1.4028771626421E-07                                                                                                                                                                                                                            | Q9D8W5, Q8BV13, Q99J14, Q99JX4, Q9CZ04, P23116, Q8R1B4, O88543, P60229                                                                                                                                                                                                                                                                                                                                                 | 2.10273635344812E-05 |
| <b>Annotation Cluster 9</b>                                             | Enrichment Score: 6.839604670278965               |                 |                      |                                                                                                                                                                                                                                                |                                                                                                                                                                                                                                                                                                                                                                                                                        |                      |
| Category                                                                | Term                                              | Count           | %                    | PValue                                                                                                                                                                                                                                         | Genes                                                                                                                                                                                                                                                                                                                                                                                                                  | FDR                  |
| UP_KEYWORDS                                                             | Ligase                                            | 51              | 4.6070460704607      | 1.12186499603661E-15                                                                                                                                                                                                                           | Q61510, P97386, Q8C0C7, B2RQC6, Q9CZW4, Q922B2, P37913, Q61035, Q99PP7, Q8C878, Q8BML9, P16460, Q9Z1F9, P46664, Q8BU30, P41216, Q91WQ3, Q9ER72, P61082, P70698, Q02053, Q68FL6, Q8BP47, Q9QXG4, E9Q555, P32921, Q9R1T2, A2AN08, Q5SUR0, Q922D8, Q80V11, Q8CGC7, Q9CZD3, Q8BMJ2, Q9QUJ7, P26638, Q9D7H3, P97494, Q9Z1Q9, Q62318, Q64737, E9Q4Z2, P51855, P63280, Q3THK7, Q9D2R0, Q9D0R2, Q9WUA2, P22682, Q8BGQ7, Q9D0I9 | 2.20921106911825E-14 |
| UP_KEYWORDS                                                             | Aminoacyl-tRNA synthetase                         | 19              | 1.7163504968383      | 1.43897259880912E-15                                                                                                                                                                                                                           | P32921, Q9Z1Q9, Q91WQ3, Q8C0C7, Q922B2, Q9ER72, Q61035, Q9D0R2, Q68FL6, Q8CGC7, Q9WUA2, Q8BML9, Q8BP47, Q9CZD3, Q8BMJ2, P26638, Q8BU30, Q8BGQ7, Q9D0I9                                                                                                                                                                                                                                                                 | 2.63126418067953E-14 |
| GOTERM_MF_DIRECTGO:0004812~aminoacyl-tRNA ligase activity               |                                                   | 18              | 1.6260162601626      | 1.36113034452581E-12                                                                                                                                                                                                                           | P32921, Q9Z1Q9, Q91WQ3, Q8C0C7, Q922B2, Q9ER72, Q61035, Q9D0R2, Q68FL6, Q8CGC7, Q9WUA2, Q8BP47, Q9CZD3, Q8BMJ2, P26638, Q8BU30, Q8BGQ7, Q9D0I9                                                                                                                                                                                                                                                                         | 1.75755955736895E-10 |
| GOTERM_BP_DIRECTGO:0006418~tRNA aminoacylation for protein synthesis    |                                                   | 17              | 1.5356820234869      | 2.61973382794464E-12                                                                                                                                                                                                                           | P32921, Q9Z1Q9, Q91WQ3, P31230, Q922B2, Q9ER72, Q61035, Q9D0R2, Q68FL6, Q8CGC7, Q8BML9, Q8BP47, Q9CZD3, Q8BMJ2, P26638, Q8BU30, Q9D0I9                                                                                                                                                                                                                                                                                 | 1.82922914536235E-09 |
| GOTERM_MF_DIRECTGO:0016874~ligase activity                              |                                                   | 51              | 4.6070460704607      | 8.65098880116949E-11                                                                                                                                                                                                                           | Q61510, P97386, Q8C0C7, B2RQC6, Q9CZW4, Q922B2, P37913, Q61035, Q99PP7, Q8C878, O88738, P16460, Q9Z1F9, P46664, Q8BU30, P41216, Q91WQ3, Q9ER72, P61082, P70698, Q02053, Q68FL6, Q8BP47, Q9QXG4, E9Q555, P32921, Q9R1T2, A2AN08, Q5SUR0, Q922D8, Q80V11, Q8CGC7, Q9CZD3, Q8BMJ2, Q9QUJ7, P26638, Q9D7H3, P97494, Q9Z1Q9, Q62318, Q64737, E9Q4Z2, P51855, P63280, Q3THK7, Q9D2R0, Q9D0R2, Q9WUA2, P22682, Q8BGQ7, Q9D0I9 | 8.93647143160808E-09 |
| KEGG_PATHWAY mmu00970:Aminoacyl-tRNA biosynthesis                       |                                                   | 19              | 1.7163504968383      | 2.72904169997737E-07                                                                                                                                                                                                                           | P32921, Q9Z1Q9, Q91WQ3, Q8C0C7, Q922B2, Q9ER72, Q61035, Q9D0R2, Q68FL6, Q8CGC7, Q9WUA2, Q8BML9, Q8BP47, Q9CZD3, Q8BMJ2, P26638, Q8BU30, Q8BGQ7, Q9D0I9                                                                                                                                                                                                                                                                 | 1.02339063749151E-05 |
| INTERPRO                                                                | IPR014729:Rossmann-like alpha/beta/alpha sandwich | 13              | 1.1743450767841      | 3.19017657056931E-07                                                                                                                                                                                                                           | P32921, Q9Z1Q9, Q91WQ3, Q9DBL7, Q9ER72, Q3THK7, Q68FL6, Q8CGC7, Q8BML9, Q8BMJ2, P16460, Q8BU30, Q9D0I9                                                                                                                                                                                                                                                                                                                 | 3.60277274036294E-05 |
| UP_SEQ_FEATURE                                                          | short sequence motif:"HIGH" region                | 9               | 0.8130081300813      | 6.76841469022575E-07                                                                                                                                                                                                                           | P32921, Q68FL6, Q9Z1Q9, Q8CGC7, Q91WQ3, Q8BMJ2, Q8BU30, Q9ER72, Q9D0I9                                                                                                                                                                                                                                                                                                                                                 | 0.000306473817173    |
| INTERPRO                                                                | IPR001412:Aminoacyl-tRNA synthetase, class I,     | 8               | 0.7226738934056      | 1.59467425289947E-06                                                                                                                                                                                                                           | P32921, Q68FL6, Q9Z1Q9, Q8CGC7, Q8BML9, Q8BMJ2, Q8BU30, Q9D0I9                                                                                                                                                                                                                                                                                                                                                         | 0.000122789917473    |
| UP_SEQ_FEATURE                                                          | short sequence motif:"KMSKS" region               | 8               | 0.7226738934056      | 3.75129909973642E-06                                                                                                                                                                                                                           | P32921, Q68FL6, Q9Z1Q9, Q8CGC7, Q91WQ3, Q8BMJ2, Q8BU30, Q9ER72                                                                                                                                                                                                                                                                                                                                                         | 0.001061617645225    |
| INTERPRO                                                                | IPR006195:Aminoacyl-tRNA synthetase, class II     | 8               | 0.7226738934056      | 4.45572951333441E-06                                                                                                                                                                                                                           | Q8CGC7, Q8BP47, Q8C0C7, Q9CZD3, P26638, Q922B2, Q61035, Q9D0R2                                                                                                                                                                                                                                                                                                                                                         | 0.000314500241483    |
| INTERPRO                                                                | IPR009080:Aminoacyl-tRNA synthetase, class I,     | 6               | 0.5420054200542      | 0.000165200882193                                                                                                                                                                                                                              | Q68FL6, Q9Z1Q9, Q8BMJ2, Q8BU30, Q9ER72, Q9D0I9                                                                                                                                                                                                                                                                                                                                                                         | 0.008230891012782    |

**Annotation Cluster 10** Enrichment Score: 6.515229921475024

| Category                                                         | Term                                     | Count | %                | PValue               | Genes                                                                                                                                                                                                                                                                                                                                                                                                                                                                                                                   | FDR                  |
|------------------------------------------------------------------|------------------------------------------|-------|------------------|----------------------|-------------------------------------------------------------------------------------------------------------------------------------------------------------------------------------------------------------------------------------------------------------------------------------------------------------------------------------------------------------------------------------------------------------------------------------------------------------------------------------------------------------------------|----------------------|
| UP_SEQ_FEATURE                                                   | nucleotide phosphate-binding region:NADP | 17    | 1.5356820234869  | 6.3638536752724E-08  | P23591, P06801, Q91YR9, Q8BVI4, Q9JII6, Q64105, Q99MZ7, Q922D8, P62482, O88844, P45376, P45377, Q8K2T1, Q91Z53, P48758, Q91X52, P21300                                                                                                                                                                                                                                                                                                                                                                                  | 4.80258824027224E-05 |
| UP_KEYWORDS                                                      | NADP                                     | 25    | 2.2583559168925  | 2.17094473793469E-07 | P23591, Q91YR9, P19096, Q9CY64, Q9JMH6, Q9DCD0, Q8BVI4, Q64105, Q922D8, Q8K0C9, Q9JLT4, Q00612, P45376, P45377, Q8K2T1, Q91Z53, P21300, Q91X52, P06801, Q9JII6, Q99MZ7, Q2TPA8, P62482, O88844, P48758                                                                                                                                                                                                                                                                                                                  | 2.13754558812031E-06 |
| UP_SEQ_FEATURE                                                   | binding site:NADP                        | 10    | 0.903342366757   | 2.0603513272553E-06  | Q8K0C9, P06801, Q91YR9, Q00612, P62482, O88844, Q8K2T1, Q91Z53, Q64105, Q922D8                                                                                                                                                                                                                                                                                                                                                                                                                                          | 0.000777439234151    |
| <b>Annotation Cluster 11</b> Enrichment Score: 5.75421132622884  |                                          |       |                  |                      |                                                                                                                                                                                                                                                                                                                                                                                                                                                                                                                         |                      |
| Category                                                         | Term                                     | Count | %                | PValue               | Genes                                                                                                                                                                                                                                                                                                                                                                                                                                                                                                                   | FDR                  |
| KEGG_PATHWAY                                                     | mmu01130:Biosynthesis of antibiotics     | 45    | 4.0650406504065  | 2.44752055970672E-11 | Q99K85, Q99JW2, Q9DCD0, Q9WTP7, Q9CQ60, Q3TW96, Q9JLJ2, Q93092, P17751, Q9CS42, Q5SUR0, Q91ZJ5, Q8CAY6, Q9CWJ9, P12382, Q8JZK9, Q00612, Q91V92, P16460, Q9Z0S1, Q9CYR6, P09411, Q9D0F9, P47856, P47857, Q9WV85, P06745, Q91YI0, Q3TRM8, P28474, Q64737, Q9JII6, O08739, Q8VCN5, P54822, Q8VEE0, Q9JHU9, O88844, P05063, Q8CHP8, P05064, P17182, Q9WUA3, Q9QXG4, P05201                                                                                                                                                  | 2.75346062967006E-09 |
| KEGG_PATHWAY                                                     | mmu01200:Carbon metabolism               | 25    | 2.2583559168925  | 8.29126545833159E-07 | Q99K85, Q9DCD0, Q9R0P3, Q9CQ60, Q93092, P17751, Q9CS42, Q8CAY6, P12382, Q00612, P09411, P47857, P06801, P06745, Q3TRM8, P28474, Q8VEE0, O88844, P05063, Q8CHP8, P05064, P17182, Q9WUA3, Q9QXG4, P05201                                                                                                                                                                                                                                                                                                                  | 2.66504961160658E-05 |
| KEGG_PATHWAY                                                     | mmu00051:Fructose and mannose metabolism | 13    | 1.1743450767841  | 1.33913601508977E-06 | P23591, Q3TRM8, P17751, P12382, Q8K0C9, P05063, P45376, P05064, Q8BZA9, P45377, Q9WUA3, P47857, P21300                                                                                                                                                                                                                                                                                                                                                                                                                  | 3.76632004243997E-05 |
| KEGG_PATHWAY                                                     | mmu01230:Biosynthesis of amino acids     | 19    | 1.7163504968383  | 2.61106421664957E-06 | Q99K85, Q99JW2, Q91YI0, Q93092, P17751, Q9CS42, Q8VCN5, P12382, Q8VEE0, P16460, Q3THS6, O88844, P05063, P05064, P09411, P17182, Q9WUA3, P47857, P05201                                                                                                                                                                                                                                                                                                                                                                  | 6.52766054162392E-05 |
| UP_KEYWORDS                                                      | Glycolysis                               | 10    | 0.903342366757   | 8.43001605555818E-06 | P12382, P06745, Q3TRM8, P05063, P05064, P09411, P17182, Q9WUA3, P47857, P17751                                                                                                                                                                                                                                                                                                                                                                                                                                          | 5.30079909507032E-05 |
| GOTERM_BP_DIRECTGO:0030388--fructose 1,6-bisphosphate metaboli   |                                          | 6     | 0.5420054200542  | 2.91894123584364E-05 | P12382, P05063, P05064, Q8BZA9, Q9WUA3, P47857                                                                                                                                                                                                                                                                                                                                                                                                                                                                          | 0.002625224225874    |
| GOTERM_BP_DIRECTGO:0006096--glycolytic process                   |                                          | 10    | 0.903342366757   | 4.29253220955281E-05 | P12382, P06745, Q3TRM8, P05063, P05064, P09411, P17182, Q9WUA3, P47857, P17751                                                                                                                                                                                                                                                                                                                                                                                                                                          | 0.003330289572578    |
| KEGG_PATHWAY                                                     | mmu00010:Glycolysis / Gluconeogenesis    | 15    | 1.3550135501355  | 0.000123467502122    | P06745, Q3TRM8, P28474, Q9JII6, Q9JLJ2, P17751, P12382, P05063, P05064, P09411, P17182, Q9WUA3, Q9D0F9, Q9QXG4, P47857                                                                                                                                                                                                                                                                                                                                                                                                  | 0.00231501566479     |
| <b>Annotation Cluster 12</b> Enrichment Score: 5.709414818966231 |                                          |       |                  |                      |                                                                                                                                                                                                                                                                                                                                                                                                                                                                                                                         |                      |
| Category                                                         | Term                                     | Count | %                | PValue               | Genes                                                                                                                                                                                                                                                                                                                                                                                                                                                                                                                   | FDR                  |
| UP_KEYWORDS                                                      | NADP                                     | 25    | 2.2583559168925  | 2.17094473793469E-07 | P23591, Q91YR9, P19096, Q9CY64, Q9JMH6, Q9DCD0, Q8BVI4, Q64105, Q922D8, Q8K0C9, Q9JLT4, Q00612, P45376, P45377, Q8K2T1, Q91Z53, P21300, Q91X52, P06801, Q9JII6, Q99MZ7, Q2TPA8, P62482, O88844, P48758                                                                                                                                                                                                                                                                                                                  | 2.13754558812031E-06 |
| UP_KEYWORDS                                                      | Oxidoreductase                           | 55    | 4.96838301716351 | 4.35375757011856E-07 | P23591, P09528, Q91YR9, O08709, P19096, Q9JMH6, Q8BVI4, Q9JLJ2, Q64105, Q9DCN2, Q8COL6, P45376, P61982, P45377, Q00519, O70325, Q6PDY2, Q9JHI5, Q8R180, Q99MZ7, Q2TPA8, P62482, Q61171, O88844, Q9DCD0, Q8R2E9, Q91WD5, Q64521, Q62465, Q922D8, Q9JLT4, Q00612, Q91Z53, P62259, Q91X52, Q91YT0, P21300, P06801, Q9CQV8, P28474, P68254, Q9JII6, Q99KP3, P11352, P35700, P20108, Q91VD9, Q9Z0X1, P24547, P07742                                                                                                          | 3.84331702741501E-06 |
| GOTERM_BP_DIRECTGO:0055114--oxidation-reduction process          |                                          | 63    | 5.69105691056911 | 1.30833783351878E-06 | P23591, P09528, P10639, Q91YR9, O08709, P19096, Q9JMH6, Q8BVI4, Q9JLJ2, Q64105, Q9DCN2, Q8COL6, P45376, Q9CZ13, P45377, Q9DB77, Q00519, O70325, Q6PDY2, Q9CQX2, Q9JHI5, Q8R180, Q99MZ7, Q9CQ75, Q2TPA8, P62482, Q61171, O88844, O09131, P48758, Q99LC3, P50396, O08807, P99029, Q9CY64, Q9DCD0, Q8R2E9, Q91WD5, Q64521, Q62465, Q922D8, Q9JLT4, Q00612, Q91Z53, Q91X52, Q91YT0, P21300, P06801, P28474, O70145, A2AAAY5, Q9JII6, Q99KP3, P11352, P35700, Q9DC69, P20108, Q91VD9, Q9Z0X1, Q3U9G9, Q8VBT0, P24547, P07742 | 0.000243612504601    |
| GOTERM_MF_DIRECTGO:0016491--oxidoreductase activity              |                                          | 53    | 4.78771454381211 | 0.000117518925747    | P23591, P09528, Q91YR9, O08709, P19096, Q9JMH6, Q8BVI4, Q9JLJ2, Q64105, Q9DCN2, Q8COL6, P45376, P45377, Q00519, O70325, Q6PDY2, Q9JHI5, Q8R180, Q99MZ7, Q2TPA8, P62482, Q61171, O88844, O09131, P48758, P50396, O08807, P99029, Q9CY64, Q9DCD0, Q8R2E9, Q91WD5, Q64521, Q62465, Q922D8, Q9JLT4, Q00612, Q91Z53, Q91X52, Q91YT0, P21300, P06801, P28352, P28474, Q9JII6, Q99KP3, P11352, P35700, P20108, Q91VD9, Q9Z0X1, P24547, P07742                                                                                  | 0.003468487151334    |

**Annotation Cluster 13** Enrichment Score: 5.598416617399601

| Category                   | Term                      | Count | %                | PValue               | Genes                                                                                                                                                                                                                                                                                                                                                                                                                                                          | FDR                  |
|----------------------------|---------------------------|-------|------------------|----------------------|----------------------------------------------------------------------------------------------------------------------------------------------------------------------------------------------------------------------------------------------------------------------------------------------------------------------------------------------------------------------------------------------------------------------------------------------------------------|----------------------|
| UP_KEYWORDS                | Cell division             | 40    | 3.613369467028   | 8.47725570639675E-08 | Q8CG48, Q6P9P6, Q8K1R7, Q9WU78, P97386, P28740, Q8BFT2, Q9R1T4, Q8R3C0, Q80X41, Q68FD5, Q07832, P30285, P37913, P11440, P49718, A2AGT5, Q9Z0Y1, O88738, P51807, Q8K2Z4, Q1HFZ0, P46467, P42208, Q8K298, P62137, Q8R1Q8, P49615, Q80UG5, P62908, P63280, Q61166, Q99P69, P60122, Q3TCJ1, Q9JLQ0, Q64261, Q9CWU9, Q9WVA3, Q8BK67                                                                                                                                 | 9.43555417755465E-07 |
| UP_KEYWORDS                | Cell cycle                | 56    | 5.05871725383921 | 9.45767187125908E-08 | Q64701, Q8CG48, Q8K1R7, P97386, Q8VBW6, Q61074, Q07832, P30285, P37913, P11440, Q80U87, Q8C878, O88738, Q9Z0Y1, P25206, Q1HFZ0, P46467, Q8R1Q8, P49615, P97310, P97311, Q61166, Q61881, P18654, Q99P69, Q9JLQ0, Q9WVA3, Q8BK67, Q6P9P6, Q9WU78, P28740, Q8BFT2, Q8R3C0, Q9R1T4, Q99MD9, Q80X41, Q68FD5, P61290, Q9QUR7, A2AGT5, P49718, P49717, P51807, Q8K2Z4, P42208, Q8K298, P62137, Q8CFI2, Q80UG5, P62908, Q9ESL4, P63280, P60122, Q3TCJ1, Q64261, Q9CWU9 | 1.0088183329343E-06  |
| UP_KEYWORDS                | Mitosis                   | 29    | 2.6196928635953  | 3.061523563023E-06   | Q8CG48, Q6P9P6, Q8K1R7, P28740, Q8BFT2, Q8R3C0, Q80X41, Q68FD5, Q07832, P11440, A2AGT5, Q9Z0Y1, O88738, P51807, Q8K2Z4, Q1HFZ0, P42208, Q8K298, Q8R1Q8, P62908, P63280, Q61166, Q99P69, P60122, Q3TCJ1, Q9JLQ0, Q9CWU9, Q9WVA3, Q8BK67                                                                                                                                                                                                                         | 2.17708342259413E-05 |
| GOTERM_BP_DIRECTGO:0051301 | ~cell division            | 40    | 3.613369467028   | 6.75937901403081E-06 | Q8CG48, Q6P9P6, Q8K1R7, Q9WU78, P97386, P28740, Q8BFT2, Q9R1T4, Q8R3C0, Q80X41, Q07832, P30285, P37913, P11440, P49718, A2AGT5, Q9Z0Y1, O88738, P51807, Q8K2Z4, Q1HFZ0, P46467, P42208, P27546, Q8K298, P62137, Q8R1Q8, P49615, Q80UG5, P62908, P63280, Q61166, Q99P69, P60122, Q3TCJ1, Q9JLQ0, Q64261, Q9CWU9, Q9WVA3, Q8BK67                                                                                                                                 | 0.001015767892489    |
| GOTERM_BP_DIRECTGO:0007067 | ~mitotic nuclear division | 31    | 2.8003613369467  | 3.77164588252871E-05 | Q8CG48, Q6P9P6, Q8K1R7, P28740, Q8BFT2, Q8R3C0, Q80X41, Q68FD5, Q07832, P11440, Q9DBR7, A2AGT5, Q9Z0Y1, O88738, P51807, Q8K2Z4, Q1HFZ0, Q8CDG3, P42208, Q8K298, Q8R1Q8, P62908, P63280, Q61166, Q99P69, P60122, Q3TCJ1, Q9JLQ0, Q9CWU9, Q9WVA3, Q8BK67                                                                                                                                                                                                         | 0.003116784797489    |
| GOTERM_BP_DIRECTGO:0007049 | ~cell cycle               | 54    | 4.87804878048781 | 4.10284825006226E-05 | Q64701, Q8CG48, Q8K1R7, P97386, Q8VBW6, Q61074, Q07832, P30285, P37913, P11440, Q80U87, Q8C878, O88738, Q9Z0Y1, P25206, Q1HFZ0, P46467, Q8R1Q8, P49615, P97310, P97311, Q61166, Q61881, P18654, Q99P69, Q9JLQ0, Q9WVA3, Q8BK67, Q6P9P6, Q9WU78, P28740, Q8BFT2, Q8R3C0, Q9R1T4, Q99MD9, Q80X41, P61290, Q9QUR7, A2AGT5, P49718, P49717, Q8K2Z4, P42208, Q8K298, P62137, Q8CFI2, Q80UG5, P62908, Q9ESL4, P63280, P60122, Q3TCJ1, Q64261, Q9CWU9                 | 0.00327407290355     |

**Annotation Cluster 14** Enrichment Score: 5.571235894008052

| Category                   | Term                                          | Count | %               | PValue               | Genes                                                                                                                  | FDR                  |
|----------------------------|-----------------------------------------------|-------|-----------------|----------------------|------------------------------------------------------------------------------------------------------------------------|----------------------|
| GOTERM_BP_DIRECTGO:1904874 | ~positive regulation of telomerase R          | 11    | 0.9936766034327 | 1.74294034537538E-10 | P80315, P80314, P80313, P42932, P60122, P11983, Q9WTM5, P80318, P80317, P80316, Q9ESX5                                 | 9.73606476926685E-08 |
| GOTERM_BP_DIRECTGO:1904871 | ~positive regulation of protein local         | 8     | 0.7226738934056 | 4.92024246862343E-09 | P80315, P80314, P80313, P42932, P11983, P80318, P80317, P80316                                                         | 1.52691524609614E-06 |
| GOTERM_CC_DIRECTGO:0005832 | ~chaperonin-containing T-complex              | 8     | 0.7226738934056 | 1.38796317441281E-08 | P80315, P80314, P80313, P42932, P11983, P80318, P80317, P80316                                                         | 3.8585376248676E-07  |
| GOTERM_BP_DIRECTGO:1904851 | ~positive regulation of establishmen          | 8     | 0.7226738934056 | 2.1203846527325E-08  | P80315, P80314, P80313, P42932, P11983, P80317, P80316, Q9ESX5                                                         | 5.3814662628398E-06  |
| INTERPRO                   | IPR002194:Chaperonin TCP-1, conserved site    | 8     | 0.7226738934056 | 3.61987981752303E-08 | P80315, P80314, P80313, P42932, P11983, P80318, P80317, P80316                                                         | 8.76010915840574E-06 |
| INTERPRO                   | IPR027410:TCP-1-like chaperonin intermediate  | 8     | 0.7226738934056 | 3.61987981752303E-08 | P80315, P80314, P80313, P42932, P11983, P80318, P80317, P80316                                                         | 8.76010915840574E-06 |
| INTERPRO                   | IPR017998:Chaperone tailless complex polypept | 8     | 0.7226738934056 | 9.57034283731048E-08 | P80315, P80314, P80313, P42932, P11983, P80318, P80317, P80316                                                         | 1.6212160766404E-05  |
| GOTERM_CC_DIRECTGO:0002199 | ~zona pellucida receptor complex              | 8     | 0.7226738934056 | 5.62493257267272E-07 | P80315, P80314, P80313, P42932, P11983, P80318, P80317, P80316                                                         | 1.30310937933585E-05 |
| INTERPRO                   | IPR027409:GroEL-like apical domain            | 8     | 0.7226738934056 | 8.84559372316474E-07 | P80315, P80314, P80313, P42932, P11983, P80318, P80317, P80316                                                         | 8.32468653724504E-05 |
| INTERPRO                   | IPR027413:GroEL-like equatorial domain        | 8     | 0.7226738934056 | 8.84559372316474E-07 | P80315, P80314, P80313, P42932, P11983, P80318, P80317, P80316                                                         | 8.32468653724504E-05 |
| INTERPRO                   | IPR002423:Chaperonin Cpn60/TCP-1              | 8     | 0.7226738934056 | 1.59467425289947E-06 | P80315, P80314, P80313, P42932, P11983, P80318, P80317, P80316                                                         | 0.000122789917473    |
| GOTERM_BP_DIRECTGO:1901998 | ~toxin transport                              | 11    | 0.9936766034327 | 4.364886757582E-06   | P80315, P80314, P80313, P42932, P61924, P29452, Q8R0H9, P11983, P80318, P80317, P80316                                 | 0.000717125218466    |
| GOTERM_BP_DIRECTGO:0032212 | ~positive regulation of telomere mai          | 10    | 0.903342366757  | 1.52469321825152E-05 | P80315, P80314, P80313, P42932, Q9JLV6, P11983, P80318, P80317, P80316, Q9ESX5                                         | 0.001860295020895    |
| GOTERM_MF_DIRECTGO:0051082 | ~unfolded protein binding                     | 15    | 1.3550135501355 | 1.96987204599351E-05 | P80315, P80314, P80313, Q9WU28, Q99L47, P11983, P11499, P35564, Q8BQM4, P42932, Q61081, Q9CWM4, P80318, P80317, P80316 | 0.000701682008107    |

|                                                               |    |                 |                      |                                                                                                                                                        |                   |
|---------------------------------------------------------------|----|-----------------|----------------------|--------------------------------------------------------------------------------------------------------------------------------------------------------|-------------------|
| GOTERM_BP_DIRECTGO:0050821~protein stabilization              | 19 | 1.7163504968383 | 4.92513178252076E-05 | P80315, P80314, P80313, Q99LX0, Q8VD75, P26450, Q8BTM8, P11983, Q9QUR7, O35129, P67778, Q91YE6, P42932, Q61081, Q80UM3, P80318, P62962, P80317, P80316 | 0.003619971860153 |
| GOTERM_CC_DIRECTGO:0044297~cell body                          | 16 | 1.4453477868112 | 6.2331942579609E-05  | P80315, P80314, Q9CXW3, P80313, P03995, Q99LX0, P11983, P42932, P51807, P20152, O09131, Q91V12, P80318, O89110, P80317, P80316                         | 0.000805966513355 |
| GOTERM_BP_DIRECTGO:0007339~binding of sperm to zona pellucida | 9  | 0.8130081300813 | 0.00027751651684     | P80315, P80314, P80313, P42932, P11983, P80318, P80317, Q80X50, P80316                                                                                 | 0.01685007894638  |

**Annotation Cluster 15** Enrichment Score: 4.921934063329559

| Category                                                      | Term                                       | Count | %               | PValue               | Genes                                                                                                                                                          | FDR                  |
|---------------------------------------------------------------|--------------------------------------------|-------|-----------------|----------------------|----------------------------------------------------------------------------------------------------------------------------------------------------------------|----------------------|
| GOTERM_CC_DIRECTGO:0022624~proteasome accessory complex       |                                            | 13    | 1.1743450767841 | 4.04868445696203E-13 | Q9D8W5, P54775, Q3TXS7, P46471, Q9CX56, O35593, P62192, Q8BJY1, Q99JI4, O35226, P62196, O88685, P62334                                                         | 1.73159119851607E-11 |
| GOTERM_CC_DIRECTGO:0008540~proteasome regulatory particle, ba |                                            | 11    | 0.9936766034327 | 9.92021719679901E-12 | P54775, O35226, Q3TXS7, P46471, P62196, P62192, O88685, Q8BJY1, P62334, Q9CR00, Q9Z2X2                                                                         | 3.67709384094683E-10 |
| GOTERM_CC_DIRECTGO:0031597~cytosolic proteasome complex       |                                            | 9     | 0.8130081300813 | 7.89046285610099E-10 | P54775, Q9JHR7, P46471, P62196, O35593, Q9WUP7, P62192, O88685, P62334                                                                                         | 2.58064549881891E-08 |
| GOTERM_CC_DIRECTGO:0031595~nuclear proteasome complex         |                                            | 7     | 0.6323396567299 | 2.37203656908744E-07 | Q9D8W5, P54775, P46471, P62196, P62192, O88685, P62334                                                                                                         | 5.73414057570703E-06 |
| INTERPRO                                                      | IPR005937:26S proteasome subunit P45       | 6     | 0.5420054200542 | 1.00098378767082E-06 | P54775, P46471, P62196, P62192, O88685, P62334                                                                                                                 | 8.47833268157186E-05 |
| GOTERM_MF_DIRECTGO:0036402~proteasome-activating ATPase acti  |                                            | 6     | 0.5420054200542 | 1.85713443969E-06    | P54775, P46471, P62196, P62192, O88685, P62334                                                                                                                 | 0.000100969467168    |
| GOTERM_BP_DIRECTGO:0030163~protein catabolic process          |                                            | 11    | 0.9936766034327 | 7.23207914555294E-05 | P54775, Q9D4H8, P46471, P62196, Q9JKB1, Q9D906, Q9R1P1, P62192, O88685, P62334, P31750                                                                         | 0.00492663342769     |
| SMART                                                         | SM00382:AAA                                | 18    | 1.6260162601626 | 0.00014045749284     | P54775, P46471, Q9WTM5, P62192, Q9WUK4, Q61881, P61222, P60122, P62196, P25206, O88685, Q99LE6, P46467, Q9JHU4, P56480, P62334, Q6P542, E9Q555                 | 0.005457776864649    |
| GOTERM_BP_DIRECTGO:0045899~positive regulation of RNA polym   |                                            | 6     | 0.5420054200542 | 0.000162231360871    | P54775, P46471, P62196, P62192, O88685, P62334                                                                                                                 | 0.010537492811919    |
| INTERPRO                                                      | IPR003593:AAA+ ATPase domain               | 18    | 1.6260162601626 | 0.000234241229209    | P54775, P46471, Q9WTM5, P62192, Q9WUK4, Q61881, P61222, P60122, P62196, P25206, O88685, Q99LE6, P46467, Q9JHU4, P56480, P62334, Q6P542, E9Q555                 | 0.011022351174457    |
| INTERPRO                                                      | IPR003960:ATPase, AAA-type, conserved site | 7     | 0.6323396567299 | 0.001015270969872    | P54775, P46471, P62196, P62192, O88685, P46467, P62334                                                                                                         | 0.037388457020955    |
| GOTERM_MF_DIRECTGO:0017025~TBP-class protein binding          |                                            | 6     | 0.5420054200542 | 0.003340943583598    | P54775, P46471, P62196, P62192, O88685, P62334                                                                                                                 | 0.056576962653388    |
| GOTERM_MF_DIRECTGO:0016887~ATPase activity                    |                                            | 20    | 1.806684733514  | 0.006081332737621    | P28740, P46471, Q9CZ30, Q03265, Q9WTM5, Q62167, Q3V300, Q8VDD5, P61222, P60122, O54984, Q9JHR7, P62196, Q99LE6, P46467, Q9JHU4, P56480, Q6P542, Q91VR2, E9Q555 | 0.090857798751736    |

**Annotation Cluster 16** Enrichment Score: 4.690226041523324

| Category                                         | Term                                        | Count | %               | PValue               | Genes                                                                                                                                                                  | FDR                  |
|--------------------------------------------------|---------------------------------------------|-------|-----------------|----------------------|------------------------------------------------------------------------------------------------------------------------------------------------------------------------|----------------------|
| INTERPRO                                         | IPR012340:Nucleic acid-binding, OB-fold     | 21    | 1.8970189701897 | 2.02712045110056E-09 | P62918, Q91WQ3, P97386, P97310, Q9JKB3, Q9CPN8, P97311, P31230, Q922B2, P37913, Q9CQ71, Q61881, Q8VEE4, P49718, P49717, Q8BP47, P60122, P63242, Q8BMJ3, P25206, Q91W50 | 6.86788408832871E-07 |
| KEGG_PATHWAY                                     | mmu03030:DNA replication                    | 14    | 1.2646793134598 | 2.41066311231235E-07 | P97310, P97311, Q9WUK4, P39749, P37913, Q9CQ71, Q61881, P33610, Q8VEE4, P49718, O35654, P49717, P25206, P17918                                                         | 1.02339063749151E-05 |
| UP_KEYWORDS                                      | DNA replication                             | 18    | 1.6260162601626 | 2.82024272930346E-07 | P97386, P97310, P97311, Q8R3C0, Q99MD9, Q9WUK4, P39749, P37913, Q9CQ71, Q61881, P33610, Q8VEE4, P49718, O35654, P49717, P25206, P17918, P07742                         | 2.5785076382203E-06  |
| GOTERM_CC_DIRECTGO:0042555~MCM complex           |                                             | 7     | 0.6323396567299 | 6.838517071339E-07   | P49718, P49717, P97310, P97311, Q8R3C0, P25206, Q61881                                                                                                                 | 1.52088619666579E-05 |
| INTERPRO                                         | IPR018525:Mini-chromosome maintenance, con: | 6     | 0.5420054200542 | 1.00098378767082E-06 | P49718, P49717, P97310, P97311, P25206, Q61881                                                                                                                         | 8.47833268157186E-05 |
| GOTERM_BP_DIRECTGO:0006260~DNA replication       |                                             | 21    | 1.8970189701897 | 2.01573169475565E-06 | P54103, P97386, P97310, P97311, Q8R3C0, Q99MD9, Q9WUK4, P39749, P37913, Q9CQ71, Q61881, Q6NVF4, P33610, Q8VEE4, P49718, Q9EPU0, O35654, P49717, P25206, P17918, P07742 | 0.000351871163966    |
| SMART                                            | SM00350:MCM                                 | 6     | 0.5420054200542 | 1.5479968898661E-05  | P49718, P49717, P97310, P97311, P25206, Q61881                                                                                                                         | 0.001052637885109    |
| GOTERM_MF_DIRECTGO:0003678~DNA helicase activity |                                             | 8     | 0.7226738934056 | 1.58189698254336E-05 | P49718, P49717, P97310, P60122, P97311, P25206, Q9WTM5, Q61881                                                                                                         | 0.000583606993917    |
| UP_SEQ_FEATURE                                   | domain:MCM                                  | 6     | 0.5420054200542 | 1.62190010538753E-05 | P49718, P49717, P97310, P97311, P25206, Q61881                                                                                                                         | 0.003059984865498    |
| INTERPRO                                         | IPR001208:Mini-chromosome maintenance, DN,  | 6     | 0.5420054200542 | 1.87823021619794E-05 | P49718, P49717, P97310, P97311, P25206, Q61881                                                                                                                         | 0.001272688794496    |
| UP_KEYWORDS                                      | Helicase                                    | 17    | 1.5356820234869 | 8.47286965413036E-05 | Q61655, Q91VR5, P97310, Q6NZQ2, P97311, Q9WTM5, P97855, Q61881, Q62167, P54823, Q6NVF4, Q91VC3, P49718, Q9EPU0, P49717, P60122, P25206                                 | 0.000433810926291    |
| GOTERM_MF_DIRECTGO:0004386~helicase activity     |                                             | 16    | 1.4453477868112 | 0.002155823400252    | Q61655, Q91VR5, P97310, Q6NZQ2, P97311, Q9WTM5, P97855, Q61881, Q62167, P54823, Q6NVF4, P49718, Q9EPU0, P49717, P60122, P25206                                         | 0.039767242365354    |

**Annotation Cluster 17** Enrichment Score: 4.577030748491163

| Category                                                         | Term                                           | Count | %               | PValue               | Genes                                                                                                                                                                                                  | FDR                  |
|------------------------------------------------------------------|------------------------------------------------|-------|-----------------|----------------------|--------------------------------------------------------------------------------------------------------------------------------------------------------------------------------------------------------|----------------------|
| KEGG_PATHWAY                                                     | mmu03050:Proteasome                            | 25    | 2.2583559168925 | 6.90935237846467E-17 | Q9D8W5, P54775, P46471, O35593, Q9R1P1, P28063, Q9R1P4, P61290, O35522, O35226, P62196, Q9Z2U1, P26516, P62334, Q9Z2U0, O09061, P97371, P97372, Q3TXS7, Q9CX56, P70195, P62192, Q99J14, Q9QUM9, O88685 | 1.55460428515455E-14 |
| GOTERM_CC_DIRECTIGO:0005839~proteasome core complex              |                                                | 9     | 0.8130081300813 | 1.46385509574046E-06 | O35522, P70195, P28063, Q9Z2U1, Q9QUM9, Q9R1P1, Q9R1P4, O09061, Q9Z2U0                                                                                                                                 | 3.1303978201219E-05  |
| UP_KEYWORDS                                                      | Threonine protease                             | 9     | 0.8130081300813 | 1.4732361480893E-06  | O35522, P70195, P28063, Q9Z2U1, Q9QUM9, Q9R1P1, Q9R1P4, O09061, Q9Z2U0                                                                                                                                 | 1.2571615130362E-05  |
| INTERPRO                                                         | IPR001353:Proteasome, subunit alpha/beta       | 9     | 0.8130081300813 | 1.81745985557013E-06 | O35522, P70195, P28063, Q9Z2U1, Q9QUM9, Q9R1P1, Q9R1P4, O09061, Q9Z2U0                                                                                                                                 | 0.000133859869362    |
| GOTERM_BP_DIRECTIGO:0002479~antigen processing and presentatio   |                                                | 10    | 0.903342366757  | 8.49280323618038E-06 | O35522, P70195, P01902, P28063, Q9Z2U1, Q9QUM9, Q9R1P1, Q9R1P4, O09061, Q9Z2U0                                                                                                                         | 0.001129542830412    |
| GOTERM_MF_DIRECTIGO:0004298~threonine-type endopeptidase activ   |                                                | 9     | 0.8130081300813 | 1.01059830273001E-05 | O35522, P70195, P28063, Q9Z2U1, Q9QUM9, Q9R1P1, Q9R1P4, O09061, Q9Z2U0                                                                                                                                 | 0.000401518479508    |
| GOTERM_BP_DIRECTIGO:0051603~proteolysis involved in cellular pro |                                                | 13    | 1.1743450767841 | 1.56236363533631E-05 | P10605, P70195, Q9R1P1, P28063, Q920A5, Q9R1P4, O35522, Q9JHR7, Q9Z2U1, Q9QUM9, O09061, Q9Z2U0, O89110                                                                                                 | 0.001860295020895    |
| GOTERM_MF_DIRECTIGO:0004175~endopeptidase activity               |                                                | 18    | 1.6260162601626 | 4.46047193206668E-05 | P10605, P57716, Q3TXS7, P29452, P70195, O35593, Q9R1P1, P28063, Q9R1P4, Q9QUR6, O35522, Q8C166, Q9Z2U1, Q9QUM9, O09061, Q9Z2U0, O89110, O89023                                                         | 0.001486344356718    |
| INTERPRO                                                         | IPR023333:Proteasome B-type subunit            | 5     | 0.4516711833785 | 0.001450749810729    | O35522, P70195, P28063, Q9R1P1, O09061                                                                                                                                                                 | 0.05228872722076     |
| INTERPRO                                                         | IPR016050:Proteasome, beta-type subunit, conse | 5     | 0.4516711833785 | 0.002022104889989    | O35522, P70195, P28063, Q9R1P1, O09061                                                                                                                                                                 | 0.063434179326705    |
| SMART                                                            | SM00948:SM00948                                | 4     | 0.3613369467028 | 0.005420287402438    | Q9Z2U1, Q9QUM9, Q9R1P4, Q9Z2U0                                                                                                                                                                         | 0.09828787823088     |
| GOTERM_CC_DIRECTIGO:0019773~proteasome core complex, alpha-st    |                                                | 4     | 0.3613369467028 | 0.006565098904081    | Q9Z2U1, Q9QUM9, Q9R1P4, Q9Z2U0                                                                                                                                                                         | 0.043706969658558    |

**Annotation Cluster 18** Enrichment Score: 4.371647785596221

| Category                                         | Term        | Count | %               | PValue               | Genes                                                                          | FDR                  |
|--------------------------------------------------|-------------|-------|-----------------|----------------------|--------------------------------------------------------------------------------|----------------------|
| UP_SEQ_FEATURE                                   | domain:PCI  | 10    | 0.903342366757  | 1.22722798860304E-07 | Q9D8W5, Q8V8V7, Q8BV13, Q99J14, Q99JX4, Q9CZ04, P23116, Q8R1B4, O88543, P60229 | 6.94611041549318E-05 |
| GOTERM_CC_DIRECTIGO:0008180~COP9 signalosome     |             | 9     | 0.8130081300813 | 9.48276808252698E-05 | Q8V8V7, Q8BV13, P63168, Q8VDD5, Q9CZ04, Q03265, P11499, O88545, O88543         | 0.001171648678641    |
| UP_KEYWORDS                                      | Signalosome | 5     | 0.4516711833785 | 0.000481799368738    | Q8V8V7, Q8BV13, Q9CZ04, O88545, O88543                                         | 0.002021977678638    |
| GOTERM_BP_DIRECTIGO:0010388~cullin deneddylation |             | 5     | 0.4516711833785 | 0.00058167748022     | Q8V8V7, Q8BV13, Q9CZ04, O88545, O88543                                         | 0.029608909445711    |

**Annotation Cluster 19** Enrichment Score: 3.9916148083197127

| Category                                | Term        | Count | %               | PValue               | Genes                                                                                                                                                                                                                                                                                                                                                                                                                                                                                                                  | FDR                 |
|-----------------------------------------|-------------|-------|-----------------|----------------------|------------------------------------------------------------------------------------------------------------------------------------------------------------------------------------------------------------------------------------------------------------------------------------------------------------------------------------------------------------------------------------------------------------------------------------------------------------------------------------------------------------------------|---------------------|
| GOTERM_CC_DIRECTIGO:0005874~microtubule |             | 39    | 3.5230352303523 | 1.45399405903289E-07 | Q8BYA0, Q61699, Q6P9P6, Q8VC03, P28740, Q8BFT2, Q922F4, P11983, Q8B8K6, Q9JKF1, O08788, O08553, P63168, P27546, Q8C052, Q8R1Q8, Q80UG5, P80315, P80314, P80313, O08539, Q61166, O08579, Q62433, Q3V300, P42932, P33174, O88447, Q3TCJ1, P62482, Q3UMY5, P23116, Q9JHU4, P62627, Q9D1E6, P80318, Q8BK67, P80317, P80316, Q6P9P6, Q8VC03, P28740, Q8BFT2, Q922F4, Q8B8K6, O08788, Q61166, O08579, Q62433, Q3V300, P63168, P33174, Q3TCJ1, P51807, O88447, Q3UMY5, Q9JHU4, P62627, P27546, Q9D1E6, Q8BK67, Q8C052, Q8R1Q8 | 3.6746395310104E-06 |
| UP_KEYWORDS                             | Microtubule | 24    | 2.1680216802168 | 0.000576549330224    | Q62433, Q3V300, P63168, P33174, Q3TCJ1, P51807, O88447, Q3UMY5, Q9JHU4, P62627, P27546, Q9D1E6, Q8BK67, Q8C052, Q8R1Q8                                                                                                                                                                                                                                                                                                                                                                                                 | 0.002380590782862   |

**Annotation Cluster 20** Enrichment Score: 3.9831356513955614

| Category                                                        | Term              | Count | %                | PValue               | Genes                                                                                                                                                                                                                                                                                                                                                                                                  | FDR                  |
|-----------------------------------------------------------------|-------------------|-------|------------------|----------------------|--------------------------------------------------------------------------------------------------------------------------------------------------------------------------------------------------------------------------------------------------------------------------------------------------------------------------------------------------------------------------------------------------------|----------------------|
| GOTERM_CC_DIRECTIGO:0030529~intracellular ribonucleoprotein con |                   | 49    | 4.42637759710931 | 3.97598666905622E-13 | P62918, Q9EQK5, P35979, Q6P5F9, P32067, Q9D883, O09167, P62317, P25444, P29341, Q9WTM5, Q60591, Q9JIK9, Q9D7A6, Q91VC3, P62320, P14131, P57780, P62889, P49962, P62843, Q9CX86, Q9CXY6, Q91VR5, Q9JKB3, P99027, Q80WS3, Q9JKF1, Q8BMA6, Q8BGA5, Q62189, P67984, Q8CGC7, Q6NVF9, Q924T2, P62852, O35900, P62908, P97379, Q9D338, Q3UEB3, Q9ESX5, P60122, P58252, Q9D8E6, Q9D8M4, P62702, P27659, Q9CQI7 | 1.73159119851607E-11 |
| UP_KEYWORDS                                                     | Ribonucleoprotein | 36    | 3.2520325203252  | 5.404367417618E-08   | Q9CX86, P62918, P35979, Q9EQK5, P99027, Q9CQO8, Q80WS3, Q8BMA6, Q9D883, Q8BGA5, Q62189, P67984, P63323, O09167, P62855, P62317, Q924T2, P25444, P62852, O35900, P62908, Q9D338, Q9JIK9, Q9D7A6, Q3UEB3, Q9ESX5, P62320, P14131, Q9D8E6, Q9D8M4, P62702, P62889, P27659, P49962, P62843, Q9CQI7                                                                                                         | 6.28871844959185E-07 |

|                                                              |    |                 |                      |                                                                                                                                                                                        |                   |
|--------------------------------------------------------------|----|-----------------|----------------------|----------------------------------------------------------------------------------------------------------------------------------------------------------------------------------------|-------------------|
| GOTERM_CC_DIRECTGO:0005840~ribosome                          | 23 | 2.0776874435411 | 5.37613835418256E-05 | P62918, P05555, P62908, P35979, P99027, Q9D338, P35564, Q9JIK9, Q99M31, P14131, P67984, Q9D8E6, O09167, P62855, Q9D8M4, P62702, P62889, P27659, Q924T2, P25444, P62852, Q6P542, P62843 | 0.000711698315458 |
| GOTERM_CC_DIRECTGO:0015935~small ribosomal subunit           | 8  | 0.7226738934056 | 0.000268496713378    | P62908, P14131, P62855, P62702, Q924T2, P25444, P62852, P62843                                                                                                                         | 0.002870849473813 |
| UP_KEYWORDS Ribosomal protein                                | 20 | 1.806684733514  | 0.00071486289065     | P62918, P62908, P35979, P99027, Q9D338, Q9JIK9, P14131, P67984, P63323, Q9D8E6, O09167, P62855, Q9D8M4, P62702, P62889, P27659, Q924T2, P25444, P62852, P62843                         | 0.002904839682641 |
| GOTERM_CC_DIRECTGO:0022627~cytosolic small ribosomal subunit | 9  | 0.8130081300813 | 0.002694334817559    | P62908, P14131, P63323, P62855, P62702, P25444, P62852, Q62167, P62843                                                                                                                 | 0.022358957590489 |
| GOTERM_CC_DIRECTGO:0022625~cytosolic large ribosomal subunit | 12 | 1.0840108401084 | 0.002955330739545    | P62918, P35979, P67984, P63323, P99027, Q9D8E6, O09167, Q9D8M4, P62889, P27659, Q8BVY0, Q91VY9                                                                                         | 0.023813969437492 |

**Annotation Cluster 21** Enrichment Score: 3.8992458243096575

| Category                                                         | Term | Count | %               | PValue               | Genes                                                                                                                                                                                  | FDR                  |
|------------------------------------------------------------------|------|-------|-----------------|----------------------|----------------------------------------------------------------------------------------------------------------------------------------------------------------------------------------|----------------------|
| GOTERM_BP_DIRECTGO:0045454~cell redox homeostasis                |      | 19    | 1.7163504968383 | 1.17115470648871E-09 | P97494, P10639, O08709, P28352, O08807, P99029, Q9JMH6, Q8R2E9, P11352, Q8R180, P35700, P20108, Q9Z0X1, Q9JLT4, Q61171, Q80Y14, Q9CQM9, Q8VBT0, Q91VW3                                 | 4.08879386902872E-07 |
| UP_KEYWORDS Redox-active center                                  |      | 14    | 1.2646793134598 | 3.24181515915869E-08 | P10639, O08709, O08807, Q9CQM5, P99029, Q9JMH6, Q8R2E9, Q8R180, P35700, P20108, Q9JLT4, Q61171, Q80Y14, Q8VBT0                                                                         | 3.95192705116487E-07 |
| INTERPRO IPR012336:Thioredoxin-like fold                         |      | 23    | 2.0776874435411 | 1.48954169075428E-07 | P10649, P54731, P10639, O70325, O08709, O08807, Q9D8N0, Q9CQM5, P99029, P11352, P35700, Q9CQ75, Q6P5G6, P20108, Q8CGC7, Q9JJU8, Q61171, Q80Y14, Q9CQM9, Q8VBT0, O09131, Q91VW3, Q9QYB1 | 2.10273635344812E-05 |
| GOTERM_MF_DIRECTGO:0051920~peroxiredoxin activity                |      | 7     | 0.6323396567299 | 2.85580228428756E-06 | P20108, O08709, O08807, Q99LX0, P99029, Q61171, P35700                                                                                                                                 | 0.00014047827427     |
| UP_SEQ_FEATURE active site:Cysteine sulfenic acid (-SOH) interme |      | 6     | 0.5420054200542 | 6.34793119054766E-06 | P20108, O08709, O08807, P99029, P35700                                                                                                                                                 | 0.00143717162154     |
| UP_KEYWORDS Peroxidase                                           |      | 8     | 0.7226738934056 | 1.87903449804007E-05 | P20108, O70325, O08709, O08807, P99029, Q61171, P11352, P35700                                                                                                                         | 0.000106896184777    |
| GOTERM_BP_DIRECTGO:0042744~hydrogen peroxide catabolic proce     |      | 7     | 0.6323396567299 | 2.83727407720762E-05 | P20108, O08709, P99029, Q61171, Q9JMH6, P11352, P35700                                                                                                                                 | 0.002625224225874    |
| INTERPRO IPR019479:Peroxiredoxin, C-terminal                     |      | 5     | 0.4516711833785 | 5.45179099985276E-05 | P20108, O08709, O08807, Q61171, P35700                                                                                                                                                 | 0.003420494056945    |
| UP_SEQ_FEATURE domain:Thioredoxin                                |      | 10    | 0.903342366757  | 7.24838184871329E-05 | P10639, P20108, O08709, O08807, Q9CQM5, P99029, Q61171, Q9CQM9, Q8VBT0, P35700                                                                                                         | 0.009116853614159    |
| GOTERM_MF_DIRECTGO:0004601~peroxidase activity                   |      | 9     | 0.8130081300813 | 0.00011346147661     | P20108, O70325, O08709, O08807, Q9CQM5, P99029, Q61171, P11352, P35700                                                                                                                 | 0.003447226627601    |
| INTERPRO IPR000866:Alkyl hydroperoxide reductase subur           |      | 5     | 0.4516711833785 | 0.000122709447029    | P20108, O08709, O08807, Q61171, P35700                                                                                                                                                 | 0.006299084947469    |
| UP_KEYWORDS Antioxidant                                          |      | 6     | 0.5420054200542 | 0.000242976766998    | P20108, O08709, O08807, P99029, Q61171, P35700                                                                                                                                         | 0.001151889858359    |
| INTERPRO IPR013766:Thioredoxin domain                            |      | 9     | 0.8130081300813 | 0.000323769363595    | P10639, P20108, O08709, O08807, P99029, Q61171, Q9CQM9, Q8VBT0, P35700                                                                                                                 | 0.014823386538632    |
| GOTERM_MF_DIRECTGO:0008379~thioredoxin peroxidase activity       |      | 4     | 0.3613369467028 | 0.003841593201985    | P20108, P99029, Q61171, P35700                                                                                                                                                         | 0.064005899639523    |
| GOTERM_MF_DIRECTGO:0016209~antioxidant activity                  |      | 6     | 0.5420054200542 | 0.006156869228094    | P20108, O08709, O08807, P99029, Q61171, P35700                                                                                                                                         | 0.090857798751736    |
| GOTERM_CC_DIRECTGO:0005623~cell                                  |      | 19    | 1.7163504968383 | 0.020252718627447    | O08709, Q3TRM8, O08807, P99029, Q9Z0P5, Q9JMH6, Q8CCP0, P29391, Q8BMA6, P35700, Q3UM18, Q9D2R0, Q9Z0X1, Q9JLT4, Q61171, Q80Y14, Q8VBT0, P17918, P22892                                 | 0.108274149585199    |

**Annotation Cluster 22** Enrichment Score: 3.6630809249995626

| Category                                                  | Term | Count | %               | PValue               | Genes                                                                          | FDR                  |
|-----------------------------------------------------------|------|-------|-----------------|----------------------|--------------------------------------------------------------------------------|----------------------|
| UP_KEYWORDS Aminopeptidase                                |      | 9     | 0.8130081300813 | 3.14968859322976E-06 | Q64514, Q99KK7, O08663, Q6P1B1, Q8BP48, Q6NSR8, Q8VCT3, Q9Z2W0, Q11011         | 2.17924399964005E-05 |
| GOTERM_MF_DIRECTGO:0004177~aminopeptidase activity        |      | 10    | 0.903342366757  | 5.88072204697869E-06 | Q64514, Q99KK7, O08663, Q6P1B1, Q8BP48, Q6NSR8, Q8VCT3, Q8R016, Q9Z2W0, Q11011 | 0.00027612663066     |
| GOTERM_MF_DIRECTGO:0070006~metalloaminopeptidase activity |      | 6     | 0.5420054200542 | 0.002075990378736    | O08663, Q6P1B1, Q8BP48, Q8VCT3, Q9Z2W0, Q11011                                 | 0.038990873840631    |

**Annotation Cluster 23** Enrichment Score: 3.475915846037723

| Category                                | Term | Count | %               | PValue               | Genes                                  | FDR               |
|-----------------------------------------|------|-------|-----------------|----------------------|----------------------------------------|-------------------|
| SMART SM00991:SM00991                   |      | 5     | 0.4516711833785 | 4.67079059614364E-05 | P32921, Q68FL6, Q8CGC7, Q9CZD3, Q61035 | 0.002540910084302 |
| INTERPRO IPR000738:WHEP-TRS             |      | 5     | 0.4516711833785 | 5.45179099985276E-05 | P32921, Q68FL6, Q8CGC7, Q9CZD3, Q61035 | 0.003420494056945 |
| INTERPRO IPR009068:S15/NS1, RNA-binding |      | 5     | 0.4516711833785 | 0.000122709447029    | P32921, Q68FL6, Q8CGC7, Q9CZD3, Q61035 | 0.006299084947469 |
| UP_SEQ_FEATURE domain:WHEP-TRS          |      | 4     | 0.3613369467028 | 0.000498013556639    | P32921, Q68FL6, Q9CZD3, Q61035         | 0.051250122374116 |

**Annotation Cluster 24** Enrichment Score: 3.338525426816872

| Category                   | Term                                    | Count | %               | PValue               | Genes                                                                                                                                                          | FDR                  |
|----------------------------|-----------------------------------------|-------|-----------------|----------------------|----------------------------------------------------------------------------------------------------------------------------------------------------------------|----------------------|
| GOTERM_MF_DIRECTGO:0008565 | protein transporter activity            | 20    | 1.806684733514  | 1.33884052064582E-09 | Q9EQH3, Q9EPL8, Q8BFY9, Q924C1, P70168, Q6P5F9, P17427, Q8VI75, P17426, Q8BKC5, Q9QZ88, Q91YE6, O35643, O35344, P62075, Q8BIJ7, P52293, P62835, P22892, P40336 | 9.22014838551423E-08 |
| INTERPRO                   | IPR001494:Importin-beta, N-terminal     | 9     | 0.8130081300813 | 2.54627021275708E-07 | Q91YE6, Q9ERK4, Q9EPL8, Q8BFY9, Q924C1, P70168, Q6P5F9, Q8VI75, Q8BKC5                                                                                         | 3.08098695743607E-05 |
| SMART                      | SM00913:SM00913                         | 8     | 0.7226738934056 | 2.07757731150367E-06 | Q91YE6, Q9ERK4, Q9EPL8, Q8BFY9, Q924C1, P70168, Q6P5F9, Q8VI75                                                                                                 | 0.000188367009576    |
| UP_SEQ_FEATURE             | domain:Importin N-terminal              | 8     | 0.7226738934056 | 3.75129909973642E-06 | Q91YE6, Q9ERK4, Q9EPL8, Q8BFY9, P70168, Q6P5F9, Q8VI75, Q8BKC5                                                                                                 | 0.001061617645225    |
| UP_SEQ_FEATURE             | repeat:HEAT 4                           | 11    | 0.9936766034327 | 1.36308418793343E-05 | Q8BYA0, A2AGT5, Q9QXK3, Q9DBQ7, Q8BFY9, P70168, Q6P5F9, Q8VI75, Q80XI3, Q8BKC5, Q76MZ3                                                                         | 0.002805475092256    |
| GOTERM_MF_DIRECTGO:0008536 | Ran GTPase binding                      | 10    | 0.903342366757  | 2.61497863008311E-05 | Q91YE6, Q9ERK4, Q9CT10, Q9EPL8, Q8BFY9, Q924C1, P70168, Q6P5F9, Q8VI75, Q8BKC5                                                                                 | 0.000900424308292    |
| UP_SEQ_FEATURE             | repeat:HEAT 1                           | 12    | 1.0840108401084 | 2.61642467713422E-05 | Q8BYA0, Q8BQM4, A2AGT5, Q9QXK3, Q9DBQ7, Q8BFY9, P70168, Q6P5F9, Q8VI75, Q80XI3, Q8BKC5, Q76MZ3                                                                 | 0.003949056979355    |
| UP_SEQ_FEATURE             | repeat:HEAT 2                           | 12    | 1.0840108401084 | 2.61642467713422E-05 | Q8BYA0, Q8BQM4, A2AGT5, Q9QXK3, Q9DBQ7, Q8BFY9, P70168, Q6P5F9, Q8VI75, Q80XI3, Q8BKC5, Q76MZ3                                                                 | 0.003949056979355    |
| UP_SEQ_FEATURE             | repeat:HEAT 3                           | 11    | 0.9936766034327 | 3.52867969170832E-05 | Q8BYA0, A2AGT5, Q9QXK3, Q9DBQ7, Q8BFY9, P70168, Q6P5F9, Q8VI75, Q80XI3, Q8BKC5, Q76MZ3                                                                         | 0.004814104641534    |
| UP_SEQ_FEATURE             | repeat:HEAT 5                           | 9     | 0.8130081300813 | 0.000116576088095    | A2AGT5, Q9QXK3, Q8BFY9, P70168, Q6P5F9, Q8VI75, Q80XI3, Q8BKC5, Q76MZ3                                                                                         | 0.013890961234008    |
| UP_SEQ_FEATURE             | repeat:HEAT 6                           | 8     | 0.7226738934056 | 0.000303386884803    | A2AGT5, Q9QXK3, Q8BFY9, P70168, Q6P5F9, Q8VI75, Q8BKC5, Q76MZ3                                                                                                 | 0.034343395359755    |
| GOTERM_BP_DIRECTGO:0006610 | ribosomal protein import into nucl      | 5     | 0.4516711833785 | 0.000336127227841    | Q91YE6, Q8BFY9, P70168, Q8VI75, Q8BKC5                                                                                                                         | 0.019558403070002    |
| GOTERM_MF_DIRECTGO:0008139 | nuclear localization sequence bind      | 7     | 0.6323396567299 | 0.000995994256855    | O35344, Q3U9G9, Q8BFY9, P52293, P70168, Q8VI75, Q8BKC5                                                                                                         | 0.020997185047584    |
| GOTERM_BP_DIRECTGO:0006607 | NLS-bearing protein import into nu      | 6     | 0.5420054200542 | 0.001033554830294    | O35344, Q8BFY9, P52293, P70168, Q8VI75, Q8BKC5                                                                                                                 | 0.045453005193108    |
| GOTERM_CC_DIRECTGO:0034399 | nuclear periphery                       | 6     | 0.5420054200542 | 0.00175068538554     | Q8BFY9, Q9D903, P70168, Q8VI75, Q99JF8, Q8BKC5                                                                                                                 | 0.014975093451699    |
| COG_ONTOLOGY               | Intracellular trafficking and secretion | 10    | 0.903342366757  | 0.002396064899822    | Q01405, O35344, Q9QXK3, Q8BFY9, P52293, P70168, Q8VI75, Q9D662, Q8BKC5, Q64324                                                                                 | 0.034742941047422    |

**Annotation Cluster 25** Enrichment Score: 3.3381065897438136

| Category                   | Term                                | Count | %               | PValue               | Genes                                                          | FDR                  |
|----------------------------|-------------------------------------|-------|-----------------|----------------------|----------------------------------------------------------------|----------------------|
| UP_KEYWORDS                | Purine biosynthesis                 | 8     | 0.7226738934056 | 2.6146432397322E-07  | Q9CWJ9, Q64737, P24547, P46664, Q3THK7, Q5SUR0, P54822, Q922D8 | 2.47906914582016E-06 |
| GOTERM_BP_DIRECTGO:0006164 | purine nucleotide biosynthetic proc | 8     | 0.7226738934056 | 2.84286693688031E-05 | Q9CWJ9, Q64737, P24547, P46664, Q3THK7, Q5SUR0, P54822, Q922D8 | 0.002625224225874    |
| GOTERM_BP_DIRECTGO:0006189 | 'de novo' IMP biosynthetic process  | 4     | 0.3613369467028 | 0.002070212624037    | Q9CWJ9, Q64737, Q5SUR0, P54822                                 | 0.081438082520214    |

**Annotation Cluster 26** Enrichment Score: 3.289136531311033

| Category                   | Term                                        | Count | %               | PValue               | Genes                                                                  | FDR                  |
|----------------------------|---------------------------------------------|-------|-----------------|----------------------|------------------------------------------------------------------------|----------------------|
| UP_KEYWORDS                | Amino-acid biosynthesis                     | 9     | 0.8130081300813 | 4.46584813890632E-06 | Q99K85, Q91YI0, P16460, Q9CQT1, Q8BGB7, Q8VCN5, P05201, Q9WVQ5, Q922D8 | 3.00857137778952E-05 |
| GOTERM_BP_DIRECTGO:0008652 | cellular amino acid biosynthetic pr         | 9     | 0.8130081300813 | 1.59853492665521E-05 | Q99K85, Q91YI0, P16460, Q9CQT1, Q8BGB7, Q8VCN5, P05201, Q9WVQ5, Q922D8 | 0.001860295020895    |
| GOTERM_BP_DIRECTGO:0019509 | L-methionine biosynthetic process           | 4     | 0.3613369467028 | 0.001074077458913    | Q9CQT1, Q8BGB7, Q9CQ65, Q9WVQ5                                         | 0.045453005193108    |
| UP_KEYWORDS                | Methionine biosynthesis                     | 4     | 0.3613369467028 | 0.003286270986793    | Q9CQT1, Q8BGB7, Q9WVQ5, Q922D8                                         | 0.011524457159164    |
| KEGG_PATHWAY               | mmu00270:Cysteine and methionine metabolism | 9     | 0.8130081300813 | 0.005140099894247    | Q3THS6, Q68FL4, Q9CQT1, Q64674, Q8BGB7, Q9CQ65, Q8VCN5, P05201, Q9WVQ5 | 0.042834165785395    |

**Annotation Cluster 27** Enrichment Score: 3.2596231130199516

| Category                   | Term                        | Count | %               | PValue               | Genes                                                                                                                                          | FDR                  |
|----------------------------|-----------------------------|-------|-----------------|----------------------|------------------------------------------------------------------------------------------------------------------------------------------------|----------------------|
| UP_KEYWORDS                | Endocytosis                 | 18    | 1.6260162601626 | 6.35630540109906E-06 | Q91ZX7, P98078, Q8VD75, Q80TY0, Q62418, Q9Z0R6, Q9CR95, O08539, Q62351, P17427, P97814, P17426, P84091, Q6PAR5, P42567, Q8BIJ7, Q60902, Q810B6 | 4.17234405815733E-05 |
| GOTERM_BP_DIRECTGO:0006897 | endocytosis                 | 24    | 2.1680216802168 | 2.51871911972172E-05 | O08539, Q62351, P17427, P97814, P17426, P84091, Q6PAR5, P42567, Q6P8X1, O08553, Q9CWK8, Q8BIJ7, Q60902, Q8BL66, Q810B6                         | 0.002605475000512    |
| GOTERM_CC_DIRECTGO:0005905 | clathrin-coated pit         | 11    | 0.9936766034327 | 0.00036759870237     | P42567, Q91ZX7, P98078, Q80TY0, Q9CR95, Q60902, Q68FD5, Q62351, P17427, P17426, P84091                                                         | 0.003716088700324    |
| UP_KEYWORDS                | Coated pit                  | 9     | 0.8130081300813 | 0.000779723347993    | P42567, Q91ZX7, P98078, Q80TY0, Q60902, Q68FD5, P17427, P17426, P84091                                                                         | 0.003118893391972    |
| GOTERM_CC_DIRECTGO:0030132 | clathrin coat of coated pit | 4     | 0.3613369467028 | 0.004530271179089    | P42567, P98078, Q60902, Q68FD5                                                                                                                 | 0.034504531172236    |

| Annotation Cluster 28                                        |                                                    | Enrichment Score: 3.189944474104752  |                 |                      |                                                                                                                                                                                                                                                        |  |  |                      |  |
|--------------------------------------------------------------|----------------------------------------------------|--------------------------------------|-----------------|----------------------|--------------------------------------------------------------------------------------------------------------------------------------------------------------------------------------------------------------------------------------------------------|--|--|----------------------|--|
| Category                                                     | Term                                               | Count                                | %               | PValue               | Genes                                                                                                                                                                                                                                                  |  |  | FDR                  |  |
| INTERPRO                                                     | IPR023409:14-3-3 protein, conserved site           | 7                                    | 0.6323396567299 | 5.16744107154937E-08 | P63101, O70456, Q9CQV8, P68510, P68254, P61982, P62259                                                                                                                                                                                                 |  |  | 1.09420564690058E-05 |  |
| SMART                                                        | SM00101:14_3_3                                     | 7                                    | 0.6323396567299 | 1.56477290647094E-07 | P63101, O70456, Q9CQV8, P68510, P68254, P61982, P62259                                                                                                                                                                                                 |  |  | 2.12809115280048E-05 |  |
| INTERPRO                                                     | IPR000308:14-3-3 protein                           | 7                                    | 0.6323396567299 | 1.98864167985819E-07 | P63101, O70456, Q9CQV8, P68510, P68254, P61982, P62259                                                                                                                                                                                                 |  |  | 2.59135308129214E-05 |  |
| INTERPRO                                                     | IPR023410:14-3-3 domain                            | 7                                    | 0.6323396567299 | 5.74000470603175E-07 | P63101, O70456, Q9CQV8, P68510, P68254, P61982, P62259                                                                                                                                                                                                 |  |  | 6.07722998251111E-05 |  |
| PIR_SUPERFAMILY                                              | PIRSF000868:14-3-3 protein                         | 7                                    | 0.6323396567299 | 2.19033325089968E-06 | P63101, O70456, Q9CQV8, P68510, P68254, P61982, P62259                                                                                                                                                                                                 |  |  | 0.000284743322617    |  |
| UP_SEQ_FEATURE                                               | site:Interaction with phosphoserine on interacting | 7                                    | 0.6323396567299 | 6.15017890566757E-06 | P63101, O70456, Q9CQV8, P68510, P68254, P61982, P62259                                                                                                                                                                                                 |  |  | 0.00143717162154     |  |
| KEGG_PATHWAY                                                 | mmu04110:Cell cycle                                | 20                                   | 1.806684733514  | 0.00075564848454     | Q64701, O70456, Q9CQV8, P97310, P97311, Q07832, P68254, P30285, Q61881, P11440, P63101, P49718, P49717, P68510, Q64261, P25206, P17918, P61982, Q9WVA3, P62259                                                                                         |  |  | 0.011334727268105    |  |
| Annotation Cluster 29                                        |                                                    | Enrichment Score: 3.1784830696638124 |                 |                      |                                                                                                                                                                                                                                                        |  |  |                      |  |
| Category                                                     | Term                                               | Count                                | %               | PValue               | Genes                                                                                                                                                                                                                                                  |  |  | FDR                  |  |
| INTERPRO                                                     | IPR013041:Coatmer/clathrin adaptor appendage       | 6                                    | 0.5420054200542 | 0.000105527987192    | O35643, Q8R0H9, Q9QXK3, P22892, P17427, P17426                                                                                                                                                                                                         |  |  | 0.006164290010437    |  |
| GOTERM_CC_DIRECTGO:0030131~clathrin adaptor complex          |                                                    | 7                                    | 0.6323396567299 | 0.000148651527658    | O35643, Q8R0H9, P22892, P35585, P17427, P17426, P84091                                                                                                                                                                                                 |  |  | 0.001796744551696    |  |
| GOTERM_CC_DIRECTGO:0030117~membrane coat                     |                                                    | 8                                    | 0.7226738934056 | 0.000336464079261    | O35643, Q8CIE6, P61924, Q9QXK3, Q68FD5, P22892, P17427, P17426                                                                                                                                                                                         |  |  | 0.00346433385313     |  |
| SMART                                                        | SM00809:Alpha_adaptinC2                            | 5                                    | 0.4516711833785 | 0.000353820203019    | O35643, Q8R0H9, P22892, P17427, P17426                                                                                                                                                                                                                 |  |  | 0.012029886902638    |  |
| INTERPRO                                                     | IPR008152:Clathrin adaptor, alpha/beta/gamma-      | 5                                    | 0.4516711833785 | 0.000411128325354    | O35643, Q8R0H9, P22892, P17427, P17426                                                                                                                                                                                                                 |  |  | 0.01785727773063     |  |
| INTERPRO                                                     | IPR009028:Coatmer/calthrin adaptor appendage       | 4                                    | 0.3613369467028 | 0.001590543472708    | O35643, Q9QXK3, P17427, P17426                                                                                                                                                                                                                         |  |  | 0.053887612855343    |  |
| INTERPRO                                                     | IPR002553:Clathrin/coatmer adaptor, adaptin-li     | 5                                    | 0.4516711833785 | 0.002731916619757    | O35643, Q9QXK3, P22892, P17427, P17426                                                                                                                                                                                                                 |  |  | 0.075866668096212    |  |
| Annotation Cluster 30                                        |                                                    | Enrichment Score: 3.101058536539847  |                 |                      |                                                                                                                                                                                                                                                        |  |  |                      |  |
| Category                                                     | Term                                               | Count                                | %               | PValue               | Genes                                                                                                                                                                                                                                                  |  |  | FDR                  |  |
| INTERPRO                                                     | IPR006195:Aminoacyl-tRNA synthetase, class II      | 8                                    | 0.7226738934056 | 4.45572951333441E-06 | Q8CGC7, Q8BP47, Q8C0C7, Q9CZD3, P26638, Q922B2, Q61035, Q9D0R2                                                                                                                                                                                         |  |  | 0.000314500241483    |  |
| INTERPRO                                                     | IPR002314:Aminoacyl-tRNA synthetase, class II      | 4                                    | 0.3613369467028 | 0.004164218998097    | Q8CGC7, Q9CZD3, P26638, Q9D0R2                                                                                                                                                                                                                         |  |  | 0.105286372877264    |  |
| Annotation Cluster 31                                        |                                                    | Enrichment Score: 2.9377271179136666 |                 |                      |                                                                                                                                                                                                                                                        |  |  |                      |  |
| Category                                                     | Term                                               | Count                                | %               | PValue               | Genes                                                                                                                                                                                                                                                  |  |  | FDR                  |  |
| UP_KEYWORDS                                                  | SH3-binding                                        | 11                                   | 0.9936766034327 | 0.000148502587789    | P42567, P70460, Q9JJU8, Q9JLQ0, P97797, Q3UIA2, Q5FWK3, Q8BPU7, Q61036, Q9ES52, Q80U87                                                                                                                                                                 |  |  | 0.000717295518379    |  |
| GOTERM_MF_DIRECTGO:0017124~SH3 domain binding                |                                                    | 17                                   | 1.5356820234869 | 0.000285185222649    | Q9WU78, P70460, P29351, P97797, Q3UIA2, P11352, Q62422, P70315, Q9ES52, Q61036, Q80U87, P42567, Q9JJU8, Q9JLQ0, Q5FWK3, Q8BPU7, P22682                                                                                                                 |  |  | 0.007553752179383    |  |
| Annotation Cluster 32                                        |                                                    | Enrichment Score: 2.92413243672798   |                 |                      |                                                                                                                                                                                                                                                        |  |  |                      |  |
| Category                                                     | Term                                               | Count                                | %               | PValue               | Genes                                                                                                                                                                                                                                                  |  |  | FDR                  |  |
| INTERPRO                                                     | IPR024969:Rpn11/EIF3F C-terminal domain            | 4                                    | 0.3613369467028 | 0.000340316252043    | Q9DCH4, O35593, O88545, P26516                                                                                                                                                                                                                         |  |  | 0.015170940288457    |  |
| SMART                                                        | SM00232:JAB_MPN                                    | 5                                    | 0.4516711833785 | 0.001254086565924    | Q76N33, Q9DCH4, O35593, O88545, P26516                                                                                                                                                                                                                 |  |  | 0.037901282881256    |  |
| INTERPRO                                                     | IPR000555:JAB1/Mov34/MPN/PAD-1                     | 5                                    | 0.4516711833785 | 0.002022104889989    | Q76N33, Q9DCH4, O35593, O88545, P26516                                                                                                                                                                                                                 |  |  | 0.063434179326705    |  |
| Annotation Cluster 33                                        |                                                    | Enrichment Score: 2.781194453945648  |                 |                      |                                                                                                                                                                                                                                                        |  |  |                      |  |
| Category                                                     | Term                                               | Count                                | %               | PValue               | Genes                                                                                                                                                                                                                                                  |  |  | FDR                  |  |
| GOTERM_BP_DIRECTGO:0051016~barbed-end actin filament capping |                                                    | 6                                    | 0.5420054200542 | 0.000759880538255    | P13020, P24452, Q9Z0P5, Q62418, P47753, P47754                                                                                                                                                                                                         |  |  | 0.035971971921114    |  |
| GOTERM_BP_DIRECTGO:0051693~actin filament capping            |                                                    | 6                                    | 0.5420054200542 | 0.001374062541526    | P13020, P24452, Q8VDD5, P47753, Q62261, P47754                                                                                                                                                                                                         |  |  | 0.057279950425094    |  |
| UP_KEYWORDS                                                  | Actin capping                                      | 5                                    | 0.4516711833785 | 0.004341750030965    | P13020, P24452, P47753, Q62261, P47754                                                                                                                                                                                                                 |  |  | 0.014411270758299    |  |
| Annotation Cluster 34                                        |                                                    | Enrichment Score: 2.682329097428867  |                 |                      |                                                                                                                                                                                                                                                        |  |  |                      |  |
| Category                                                     | Term                                               | Count                                | %               | PValue               | Genes                                                                                                                                                                                                                                                  |  |  | FDR                  |  |
| UP_KEYWORDS                                                  | mRNA processing                                    | 31                                   | 2.8003613369467 | 1.0573774809287E-05  | Q8BMZ5, Q91VR5, O70551, Q9CQQ8, Q99K48, Q62384, Q9D883, Q62189, Q9JKP5, Q9DAR7, Q8VIJ6, Q6NVF9, P83870, Q5SUF2, Q3TIU4, P62317, Q9DBR1, O35900, Q569Z6, Q0VGB7, Q9JL18, P29341, O08810, Q3UEB3, Q91VC3, P62320, P16110, O08583, Q3U0V1, Q9CQ17, Q9DAW6 |  |  | 6.44496750280353E-05 |  |

|                  |                                |    |                 |                      |                                                                                                                                                                                                                                                        |                   |
|------------------|--------------------------------|----|-----------------|----------------------|--------------------------------------------------------------------------------------------------------------------------------------------------------------------------------------------------------------------------------------------------------|-------------------|
| UP_KEYWORDS      | mRNA splicing                  | 26 | 2.3486901535682 | 1.93085157493175E-05 | O70551, Q9CQQ8, Q99K48, Q62384, Q9D883, Q62189, Q9JKP5, Q9DAR7, Q8VIJ6, P83870, Q5SUF2, P62317, O35900, Q569Z6, Q0VGB7, Q9JL18, P29341, O08810, Q3UEB3, Q91VC3, P62320, P16110, O08583, Q3U0V1, Q9CQI7, Q9DAW6                                         | 0.000107456087648 |
| GOTERM_BP_DIRECT | GO:006397~mRNA processing      | 31 | 2.8003613369467 | 0.000534460803259    | Q8BMZ5, Q91VR5, O70551, Q99K48, Q62384, Q9D883, Q62189, Q9JKP5, Q9DAR7, Q8VIJ6, Q6NVF9, P83870, Q5SUF2, Q3TIU4, P62317, P05132, Q9DBR1, O35900, Q569Z6, Q0VGB7, Q9JL18, P29341, O08810, Q3UEB3, Q91VC3, P62320, P16110, O08583, Q3U0V1, Q9CQI7, Q9DAW6 | 0.029608909445711 |
| GOTERM_BP_DIRECT | GO:008380~RNA splicing         | 25 | 2.2583559168925 | 0.000745614285095    | O70551, Q99K48, Q62384, Q9D883, Q62189, Q9JKP5, Q9DAR7, Q8VIJ6, P83870, Q5SUF2, P62317, O35900, Q569Z6, Q0VGB7, Q9JL18, P29341, O08810, Q3UEB3, Q91VC3, P62320, P16110, O08583, Q3U0V1, Q9CQI7, Q9DAW6                                                 | 0.03590518445293  |
| UP_KEYWORDS      | Spliceosome                    | 14 | 1.2646793134598 | 0.001017953008215    | Q9CQQ8, P29341, Q9D883, Q62189, O08810, Q91VC3, P62320, O08583, P16110, P83870, P62317, O35900, Q9DAW6, Q9CQI7                                                                                                                                         | 0.003948423789441 |
| GOTERM_CC_DIRECT | GO:005681~spliceosomal complex | 14 | 1.2646793134598 | 0.009778249637941    | P29341, Q9D883, Q62189, O08810, Q6NVF4, P62320, O35841, O08583, P16110, P83870, P62317, O35900, Q9DAW6, Q9CQI7                                                                                                                                         | 0.061086593243766 |

**Annotation Cluster 35** Enrichment Score: 2.5526310887031296

| Category         | Term                                          | Count | %                | PValue               | Genes                                                                                                                                                                                                                                                                                                                                                                                                                                  | FDR                  |
|------------------|-----------------------------------------------|-------|------------------|----------------------|----------------------------------------------------------------------------------------------------------------------------------------------------------------------------------------------------------------------------------------------------------------------------------------------------------------------------------------------------------------------------------------------------------------------------------------|----------------------|
| UP_KEYWORDS      | Protease                                      | 47    | 4.2457091237579  | 2.80002753556564E-06 | Q6PIB1, P29452, B2RRE7, P56399, Q9JKB1, Q8K2H2, O35593, Q9DCH4, Q9R1P1, Q9WUP7, P28063, Q9R1P4, Q8C0M9, Q99K23, P61290, Q80U87, Q9QUR6, O35522, Q9JHR7, P62196, Q9Z2U1, Q8CDG3, Q9Z2W0, Q9Z2U0, O09061, O89023, Q64514, Q8R5H1, P10605, Q9JMA1, Q99LX0, P70195, Q6NSR8, Q8VCT3, Q76N33, Q920A5, P35123, P70677, Q99KK7, O08663, Q8BP48, Q9QUM9, Q8R016, Q8BHG1, Q9D1A2, Q11011, O89110                                                 | 2.04802014029944E-05 |
| GOTERM_BP_DIRECT | GO:006508~proteolysis                         | 52    | 4.69738030713641 | 3.7941526356827E-05  | Q6PIB1, P29452, B2RRE7, P56399, Q9JKB1, Q8K2H2, Q99K23, Q80U87, O35522, Q9JHR7, O88456, Q8CDG3, Q9Z2U1, Q8R146, Q9DB77, Q9Z2U0, O89023, Q64514, Q8R5H1, P10605, Q9CX56, Q99LX0, Q8VCT3, Q920A5, P35123, Q8BP48, Q9QUM9, Q8R016, Q9D1A2, Q99JW2, Q9JKB1, O35593, Q9DCH4, Q9WUP7, P28063, Q9R1P1, Q9R1P4, Q8C0M9, Q9QUR6, Q9Z2W0, O09061, Q9JMA1, P70195, Q6NSR8, Q76N33, P70677, Q99KK7, O08663, Q8C166, Q8BHG1, P22682, Q11011, O89110 | 0.003116784797489    |
| GOTERM_MF_DIRECT | GO:008233~peptidase activity                  | 48    | 4.3360433604336  | 6.39820605540555E-05 | Q6PIB1, P29452, B2RRE7, P56399, Q9JKB1, Q8K2H2, O35593, Q9DCH4, Q9R1P1, Q9WUP7, P28063, Q9R1P4, Q8C0M9, Q99K23, P61290, Q80U87, Q9QUR6, O35522, Q9JHR7, P62196, Q9Z2U1, Q8CDG3, Q9Z2W0, Q9Z2U0, O09061, O89023, Q64514, Q8R5H1, P10605, P57716, Q9JMA1, Q99LX0, P70195, Q6NSR8, Q8VCT3, Q76N33, Q920A5, P35123, P70677, Q99KK7, O08663, Q8BP48, Q9QUM9, Q8R016, Q8BHG1, Q9D1A2, Q11011, O89110                                         | 0.002002832380374    |
| UP_KEYWORDS      | Thiol protease                                | 17    | 1.5356820234869  | 0.000121767139894    | P10605, Q8R5H1, P29452, B2RRE7, Q9JMA1, P56399, Q9JKB1, Q9DCH4, Q8K2H2, Q9WUP7, P35123, P70677, Q99K23, Q80U87, Q8CDG3, Q8R016, O89110                                                                                                                                                                                                                                                                                                 | 0.000600668549165    |
| GOTERM_MF_DIRECT | GO:008234~cysteine-type peptidase activity    | 17    | 1.5356820234869  | 0.002011879779301    | P10605, Q8R5H1, P29452, B2RRE7, Q9JMA1, P56399, Q9JKB1, Q9DCH4, Q8K2H2, Q9WUP7, P35123, P70677, Q99K23, Q80U87, Q8CDG3, Q8R016, O89110                                                                                                                                                                                                                                                                                                 | 0.03848651503736     |
| GOTERM_MF_DIRECT | GO:0036459~thiol-dependent ubiquitinyl hydrol | 11    | 0.9936766034327  | 0.00518629450554     | Q8R5H1, B2RRE7, Q9JMA1, P56399, Q9JKB1, Q9DCH4, Q8K2H2, Q8CDG3, Q9WUP7, P35123, Q80U87                                                                                                                                                                                                                                                                                                                                                 | 0.081173367033685    |

**Annotation Cluster 36** Enrichment Score: 2.5265650857574364

| Category | Term                                             | Count | %               | PValue            | Genes                                                          | FDR               |
|----------|--------------------------------------------------|-------|-----------------|-------------------|----------------------------------------------------------------|-------------------|
| INTERPRO | IPR009000:Translation elongation/initiation fact | 8     | 0.7226738934056 | 0.000223803964378 | Q8R050, Q9Z0N1, P58252, Q69ZS7, Q05D44, P27659, O08810, Q8BGQ7 | 0.01083211187591  |
| INTERPRO | IPR000795:Elongation factor, GTP-binding dom     | 6     | 0.5420054200542 | 0.0015344215208   | Q8R050, Q9Z0N1, P58252, Q69ZS7, Q05D44, O08810                 | 0.053887612855343 |
| INTERPRO | IPR004161:Translation elongation factor EFTu/    | 5     | 0.4516711833785 | 0.002731916619757 | Q8R050, Q9Z0N1, P58252, Q05D44, O08810                         | 0.075866668096212 |

**Annotation Cluster 37** Enrichment Score: 2.471552700394736

| Category         | Term                                             | Count | %               | PValue            | Genes                                                  | FDR               |
|------------------|--------------------------------------------------|-------|-----------------|-------------------|--------------------------------------------------------|-------------------|
| UP_KEYWORDS      | Elongation factor                                | 7     | 0.6323396567299 | 0.000257610190846 | P10711, P58252, Q9D8N0, Q69ZS7, P63242, P57776, O08810 | 0.001177646586726 |
| GOTERM_MF_DIRECT | GO:0003746~translation elongation factor activit | 7     | 0.6323396567299 | 0.001924837216249 | P10711, P58252, Q9D8N0, Q69ZS7, P63242, P57776, O08810 | 0.03751616687519  |

**Annotation Cluster 38** Enrichment Score: 2.4566978174276994

| Category                                                     | Term | Count | %               | PValue               | Genes                                                          | FDR               |
|--------------------------------------------------------------|------|-------|-----------------|----------------------|----------------------------------------------------------------|-------------------|
| GOTERM_CC_DIRECTGO:0030904~retromer complex                  |      | 8     | 0.7226738934056 | 5.36628269431775E-05 | Q9QZ88, Q6P8X1, Q6PGL7, Q9CWK8, Q9EQH3, P40336, O08788, Q810B6 | 0.000711698315458 |
| GOTERM_CC_DIRECTGO:0030906~retromer, cargo-selective complex |      | 3     | 0.2710027100271 | 0.006114467923801    | Q9QZ88, Q9EQH3, P40336                                         | 0.043033470451055 |

**Annotation Cluster 39** Enrichment Score: 2.4489385342962664

| Category                                                          | Term                             | Count | %                 | PValue               | Genes                                          | FDR                  |
|-------------------------------------------------------------------|----------------------------------|-------|-------------------|----------------------|------------------------------------------------|----------------------|
| GOTERM_BP_DIRECTGO:0030388~fructose 1,6-bisphosphate metabolism   |                                  | 6     | 0.5420054200542   | 2.91894123584364E-05 | P12382, P05063, P05064, Q8BZA9, Q9WUA3, P47857 | 0.002625224225874    |
| UP_SEQ_FEATURE                                                    | metal ion-binding site:Magnesium | 8     | 0.722673893405601 |                      |                                                | 3.61483122376666E-05 |
| GOTERM_BP_DIRECTGO:0006002~fructose 6-phosphate metabolic process | via carb                         | 5     | 0.4516711833785   | 0.00058167748022     | P12382, Q9WUA3, P47856, P47857, Q93092         | 0.029608909445711    |
| GOTERM_BP_DIRECTGO:0061615~glycolytic process through fructose    |                                  | 4     | 0.3613369467028   | 0.001074077458913    | P12382, P05064, Q9WUA3, P47857                 | 0.045453005193108    |
| GOTERM_CC_DIRECTGO:0005945~6-phosphofructokinase complex          |                                  | 3     | 0.2710027100271   | 0.006114467923801    | P12382, Q9WUA3, P47857                         | 0.043033470451055    |
| GOTERM_MF_DIRECTGO:0003872~6-phosphofructokinase activity         |                                  | 3     | 0.2710027100271   | 0.007368907513844    | P12382, Q9WUA3, P47857                         | 0.104275088517816    |

**Annotation Cluster 40** Enrichment Score: 2.3936440983155554

| Category                                               | Term                                 | Count | %               | PValue            | Genes                                          | FDR               |
|--------------------------------------------------------|--------------------------------------|-------|-----------------|-------------------|------------------------------------------------|-------------------|
| INTERPRO                                               | IPR017926:Glutamine amidotransferase | 4     | 0.3613369467028 | 0.001590543472708 | B2RQC6, Q3THK7, P70698, Q5SUR0                 | 0.053887612855343 |
| GOTERM_BP_DIRECTGO:0006541~glutamine metabolic process |                                      | 6     | 0.5420054200542 | 0.002292604665817 | B2RQC6, Q3THK7, P47856, P70698, Q5SUR0, Q9JHW2 | 0.088933955994832 |
| UP_KEYWORDS                                            | Glutamine amidotransferase           | 4     | 0.3613369467028 | 0.003286270986793 | Q3THK7, P47856, P70698, Q5SUR0                 | 0.011524457159164 |

**Annotation Cluster 41** Enrichment Score: 2.20720226785467

| Category                                                | Term                             | Count | %                 | PValue            | Genes                                                  | FDR                  |
|---------------------------------------------------------|----------------------------------|-------|-------------------|-------------------|--------------------------------------------------------|----------------------|
| UP_SEQ_FEATURE                                          | metal ion-binding site:Magnesium | 8     | 0.722673893405601 |                   |                                                        | 3.61483122376666E-05 |
| UP_KEYWORDS                                             | Nucleotide metabolism            | 7     | 0.6323396567299   | 0.000257610190846 | Q9WV85, Q9JMJ4, Q6P3D0, Q3V1L4, O08739, Q9D892, Q3UFY7 | 0.001177646586726    |
| GOTERM_BP_DIRECTGO:0009117~nucleotide metabolic process |                                  | 7     | 0.6323396567299   | 0.001622677905164 | Q9WV85, Q9JMJ4, Q6P3D0, Q3V1L4, O08739, Q9D892, Q3UFY7 | 0.065683179552513    |

**Annotation Cluster 42** Enrichment Score: 2.105246875802888

| Category    | Term           | Count | %               | PValue            | Genes                                                                                                  | FDR               |
|-------------|----------------|-------|-----------------|-------------------|--------------------------------------------------------------------------------------------------------|-------------------|
| UP_KEYWORDS | Citrullination | 13    | 1.1743450767841 | 0.000451899363529 | P03995, Q62318, P15864, O08583, P68433, Q9D8E6, P43274, P43275, P43277, P25444, P84228, Q99JF8, P02301 | 0.001960783679039 |

**Annotation Cluster 43** Enrichment Score: 2.0888501721558557

| Category                                              | Term   | Count | %               | PValue            | Genes                                                                                                          | FDR               |
|-------------------------------------------------------|--------|-------|-----------------|-------------------|----------------------------------------------------------------------------------------------------------------|-------------------|
| GOTERM_MF_DIRECTGO:0003774~motor activity             |        | 14    | 1.2646793134598 | 0.000150002191255 | Q9JMH9, Q61879, O08638, P70248, O08788, Q9QUR7, P63168, Q8VDD5, P51807, Q60605, Q6URW6, Q9JHU4, P62627, Q8R1Q8 | 0.004304229543519 |
| GOTERM_CC_DIRECTGO:0005868~cytoplasmic dynein complex |        | 6     | 0.5420054200542 | 0.003389828395156 | P63168, P51807, Q9JHU4, P62627, O08788, Q8R1Q8                                                                 | 0.026924922681525 |
| UP_KEYWORDS                                           | Dynein | 6     | 0.5420054200542 | 0.007990593971891 | P63168, P51807, Q9JHU4, P62627, O08788, Q8R1Q8                                                                 | 0.024946244595172 |

**Annotation Cluster 44** Enrichment Score: 2.0773377590514213

| Category                                                                | Term | Count | %               | PValue               | Genes                                                          | FDR               |
|-------------------------------------------------------------------------|------|-------|-----------------|----------------------|----------------------------------------------------------------|-------------------|
| GOTERM_BP_DIRECTGO:0061136~regulation of proteasomal protein catabolism |      | 8     | 0.7226738934056 | 8.11290871701881E-06 | P97372, Q9JMA1, O35593, Q9WUP7, P05132, P11352, P61290, P97371 | 0.001129542830412 |
| GOTERM_CC_DIRECTGO:0008537~proteasome activator complex                 |      | 3     | 0.2710027100271 | 0.011857177713275    | P97372, P61290, P97371                                         | 0.072760689079764 |

**Annotation Cluster 45** Enrichment Score: 2.0492185372620626

| Category                                                    | Term | Count | %               | PValue            | Genes                                          | FDR              |
|-------------------------------------------------------------|------|-------|-----------------|-------------------|------------------------------------------------|------------------|
| GOTERM_CC_DIRECTGO:0030665~clathrin-coated vesicle membrane |      | 6     | 0.5420054200542 | 0.000189978384741 | O35643, P98078, Q8VD75, Q62418, P22892, P35585 | 0.00224740387055 |

**Annotation Cluster 46** Enrichment Score: 1.9146194557192486

| Category | Term          | Count | %               | PValue            | Genes                                  | FDR            |
|----------|---------------|-------|-----------------|-------------------|----------------------------------------|----------------|
| SMART    | SM00515:eIF5C | 5     | 0.4516711833785 | 0.000105289049493 | Q62448, Q6NZJ6, P59325, Q80XI3, Q2L4X1 | 0.004773103577 |

|                |                     |   |                 |                   |                                        |                   |
|----------------|---------------------|---|-----------------|-------------------|----------------------------------------|-------------------|
| INTERPRO       | IPR003307:W2 domain | 5 | 0.4516711833785 | 0.000122709447029 | Q62448, Q6NZJ6, P59325, Q80XI3, Q2L4X1 | 0.006299084947469 |
| UP_SEQ_FEATURE | domain:W2           | 5 | 0.4516711833785 | 0.000670335976629 | Q62448, Q6NZJ6, P59325, Q80XI3, Q2L4X1 | 0.06598437613424  |

**Annotation Cluster 47** Enrichment Score: 1.879500882094488

| Category         | Term                                            | Count | %               | PValue               | Genes                                                                                  | FDR               |
|------------------|-------------------------------------------------|-------|-----------------|----------------------|----------------------------------------------------------------------------------------|-------------------|
| GOTERM_CC_DIRECT | GO:0030863--cortical cytoskeleton               | 10    | 0.903342366757  | 6.99676893605065E-06 | P21107, Q7TPR4, Q8VDD5, P57780, Q8BTM8, P47753, Q62261, Q6IRU2, P47754, Q9ESS2         | 0.000125490436401 |
| SMART            | SM00033:CH                                      | 10    | 0.903342366757  | 0.001903399551459    | Q99K51, Q3UQ44, P27870, Q7TPR4, P57780, Q8BTM8, Q62261, Q9JKF1, Q9QXS1, Q9WVA4         | 0.047065879817901 |
| INTERPRO         | IPR001715:Calponin homology domain              | 11    | 0.9936766034327 | 0.00193884952245     | Q99K51, Q3UQ44, P27870, Q7TPR4, P57780, Q8BTM8, Q62261, Q9JKF1, Q9QXS1, Q61166, Q9WVA4 | 0.063161751750597 |
| INTERPRO         | IPR001589:Actinin-type, actin-binding, conserve | 6     | 0.5420054200542 | 0.002981015689982    | Q99K51, Q7TPR4, P57780, Q8BTM8, Q62261, Q9QXS1                                         | 0.080156199663952 |

**Annotation Cluster 48** Enrichment Score: 1.8535421934588352

| Category         | Term                                    | Count | %               | PValue            | Genes                                                                                                                                                                                                                                  | FDR               |
|------------------|-----------------------------------------|-------|-----------------|-------------------|----------------------------------------------------------------------------------------------------------------------------------------------------------------------------------------------------------------------------------------|-------------------|
| KEGG_PATHWAY     | mmu05012:Parkinson's disease            | 22    | 1.9873532068654 | 0.001242876869027 | P51881, Q60931, Q99LX0, Q9ERS2, Q03265, P70677, Q91WD5, P68181, Q9CQ75, Q02053, P62254, Q9DC69, Q91VD9, Q9CZ13, P56383, P05132, P48962, P56480, Q99LC3, Q9DB77, Q91VR2, Q91YT0                                                         | 0.014255251366974 |
| UP_KEYWORDS      | Mitochondrion inner membrane            | 21    | 1.8970189701897 | 0.004166948610113 | P51881, Q8CAQ8, P62908, Q8BGA9, Q9ERS2, Q03265, Q64521, Q91WD5, Q9CQ75, Q35129, P67778, Q91VD9, Q9Z0X1, Q9CRB9, P62075, Q9CZ13, P48962, P56480, Q9DB77, Q91VR2, Q91YT0                                                                 | 0.014036037423539 |
| GOTERM_CC_DIRECT | GO:005743--mitochondrial inner membrane | 29    | 2.6196928635953 | 0.011977126899161 | P51881, Q8CAQ8, Q8BGA9, Q9ERS2, Q91WD5, Q64521, Q9DCN2, Q35129, Q9CRB9, P62075, Q9CZ13, Q91W50, P48962, P56480, Q9DB77, Q91VR2, P42227, Q91YT0, P62908, Q70325, Q60931, Q03265, Q9CQX2, Q9CQ75, P67778, Q9DC69, Q91VD9, Q9Z0X1, P16110 | 0.072760689079764 |

**Annotation Cluster 49** Enrichment Score: 1.8489716436322232

| Category | Term                                        | Count | %               | PValue            | Genes                          | FDR               |
|----------|---------------------------------------------|-------|-----------------|-------------------|--------------------------------|-------------------|
| INTERPRO | IPR011237:Peptidase M16 domain              | 4     | 0.3613369467028 | 0.002691418991987 | Q9JHR7, Q9CZ13, Q8BHG1, Q9DB77 | 0.075866668096212 |
| INTERPRO | IPR011249:Metalloenzyme, LuxS/M16 peptidase | 4     | 0.3613369467028 | 0.002691418991987 | Q9JHR7, Q9CZ13, Q8BHG1, Q9DB77 | 0.075866668096212 |
| INTERPRO | IPR007863:Peptidase M16, C-terminal domain  | 4     | 0.3613369467028 | 0.002691418991987 | Q9JHR7, Q9CZ13, Q8BHG1, Q9DB77 | 0.075866668096212 |
| INTERPRO | IPR011765:Peptidase M16, N-terminal         | 4     | 0.3613369467028 | 0.002691418991987 | Q9JHR7, Q9CZ13, Q8BHG1, Q9DB77 | 0.075866668096212 |

**Annotation Cluster 50** Enrichment Score: 1.834905897686386

| Category         | Term               | Count | %               | PValue            | Genes                                          | FDR               |
|------------------|--------------------|-------|-----------------|-------------------|------------------------------------------------|-------------------|
| GOTERM_CC_DIRECT | GO:005685-U1 snRNP | 6     | 0.5420054200542 | 0.001364052277053 | P62320, Q9CY14, Q7TNC4, Q5SUF2, P62317, Q62189 | 0.012232468807124 |

**Annotation Cluster 51** Enrichment Score: 1.8311105898226887

| Category | Term               | Count | %               | PValue            | Genes                                                                  | FDR               |
|----------|--------------------|-------|-----------------|-------------------|------------------------------------------------------------------------|-------------------|
| SMART    | SM00165:UBA        | 7     | 0.6323396567299 | 0.002906361699344 | Q91VX2, P56399, P61087, P22682, P54726, Q8R317, Q80X50                 | 0.06587753185179  |
| INTERPRO | IPR009060:UBA-like | 9     | 0.8130081300813 | 0.003989009528657 | Q91VX2, P56399, P61087, P22682, P54726, Q9QZ73, Q8R317, Q80X50, Q6P5G6 | 0.103959725254541 |

**Annotation Cluster 52** Enrichment Score: 1.819771644049073

| Category         | Term                       | Count | %               | PValue               | Genes                                                                                                                                  | FDR               |
|------------------|----------------------------|-------|-----------------|----------------------|----------------------------------------------------------------------------------------------------------------------------------------|-------------------|
| GOTERM_CC_DIRECT | GO:005903--brush border    | 15    | 1.3550135501355 | 9.36623957643872E-06 | Q9JMH9, Q7TPR4, Q9Z0G0, Q61879, Q8BTM8, O08638, Q9QXS1, Q9JJ28, Q8VDD5, P57780, Q60605, P47753, Q6URW6, P47754, Q91X52                 | 0.000162738412641 |
| UP_KEYWORDS      | Motor protein              | 17    | 1.5356820234869 | 7.02325944876648E-05 | Q6P9P6, Q9JMH9, P28740, Q61879, O08638, P70248, Q3V300, P63168, Q8VDD5, P33174, P51807, O88447, Q60605, Q6URW6, Q9JHU4, P62627, Q8R1Q8 | 0.000366929473242 |
| GOTERM_MF_DIRECT | GO:0003774--motor activity | 14    | 1.2646793134598 | 0.000150002191255    | Q9JMH9, Q61879, O08638, P70248, O08788, Q9QUR7, P63168, Q8VDD5, P51807, Q60605, Q6URW6, Q9JHU4, P62627, Q8R1Q8                         | 0.004304229543519 |
| GOTERM_CC_DIRECT | GO:001725--stress fiber    | 12    | 1.0840108401084 | 0.00021724266865     | Q62523, P21107, Q7TPR4, Q8VDD5, P57780, Q61879, Q6URW6, Q6IRU2, O08638, P07356, P97814, Q80UG5                                         | 0.002465039260597 |

|                                                |                                                  |    |                 |                   |                                                                                                 |                   |
|------------------------------------------------|--------------------------------------------------|----|-----------------|-------------------|-------------------------------------------------------------------------------------------------|-------------------|
| INTERPRO                                       | IPR027401:Myosin-like IQ motif-containing domain | 6  | 0.5420054200542 | 0.000913169063329 | Q9JMH9, Q8VDD5, Q61879, Q6URW6, O08638, Q9JKF1                                                  | 0.034375742072857 |
| GOTERM_CC_DIRECTIGO:0097513~myosin II filament |                                                  | 3  | 0.2710027100271 | 0.006114467923801 | Q8VDD5, Q61879, Q6URW6                                                                          | 0.043033470451055 |
| GOTERM_CC_DIRECTIGO:0042641~actomyosin         |                                                  | 4  | 0.3613369467028 | 0.012039538480824 | Q9JMH9, Q8VDD5, Q61879, Q6URW6                                                                  | 0.072760689079764 |
| UP_KEYWORDS                                    | Myosin                                           | 7  | 0.6323396567299 | 0.013159248530889 | Q9JMH9, Q8VDD5, Q61879, Q60605, Q6URW6, O08638, P70248                                          | 0.038721466941468 |
| UP_KEYWORDS                                    | Calmodulin-binding                               | 12 | 1.0840108401084 | 0.027872516350975 | Q3UQ44, Q8VDD5, Q61879, Q62261, Q6URW6, P63328, O08638, Q9JKF1, P70248, A2AN08, P58404, Q8VVCN5 | 0.072809838631119 |

**Annotation Cluster 53** Enrichment Score: 1.7880504824279126

| Category                                                | Term | Count | %               | PValue            | Genes                          | FDR               |
|---------------------------------------------------------|------|-------|-----------------|-------------------|--------------------------------|-------------------|
| GOTERM_CC_DIRECTIGO:0005826~actomyosin contractile ring |      | 4     | 0.3613369467028 | 0.001733905341856 | Q8VDD5, P42208, P97814, Q8K298 | 0.014975093451699 |

**Annotation Cluster 54** Enrichment Score: 1.784243550797122

| Category                                                                      | Term                                             | Count | %               | PValue            | Genes                                                                                                                                                  | FDR               |
|-------------------------------------------------------------------------------|--------------------------------------------------|-------|-----------------|-------------------|--------------------------------------------------------------------------------------------------------------------------------------------------------|-------------------|
| UP_KEYWORDS                                                                   | Hydrogen ion transport                           | 9     | 0.8130081300813 | 0.000430534054592 | P50518, Q8BVE3, Q03265, P56383, P50516, P62814, P56480, Q91VR2, Q9Z1G3                                                                                 | 0.001911493330035 |
| GOTERM_BP_DIRECTIGO:0046034~ATP metabolic process                             |                                                  | 9     | 0.8130081300813 | 0.000593429485518 | Q91VD9, Q9CZ30, Q9WTP7, Q03265, P50516, O08739, P62814, P56480, Q91VR2                                                                                 | 0.029608909445711 |
| INTERPRO                                                                      | IPR020003:ATPase, alpha/beta subunit, nucleotide | 4     | 0.3613369467028 | 0.000822530691339 | Q03265, P50516, P62814, P56480                                                                                                                         | 0.032403883514611 |
| INTERPRO                                                                      | IPR000194:ATPase, F1/V1/A1 complex, alpha/beta   | 4     | 0.3613369467028 | 0.000822530691339 | Q03265, P50516, P62814, P56480                                                                                                                         | 0.032403883514611 |
| INTERPRO                                                                      | IPR004100:ATPase, alpha/beta subunit, N-terminal | 4     | 0.3613369467028 | 0.000822530691339 | Q03265, P50516, P62814, P56480                                                                                                                         | 0.032403883514611 |
| GOTERM_BP_DIRECTIGO:0015991~ATP hydrolysis coupled proton transport           |                                                  | 8     | 0.7226738934056 | 0.000899440896117 | P50518, Q8BVE3, Q03265, P56383, P50516, P62814, P56480, Q9Z1G3                                                                                         | 0.041182597095998 |
| GOTERM_MF_DIRECTIGO:0046961~proton-transporting ATPase activity               |                                                  | 7     | 0.6323396567299 | 0.000995994256855 | P50518, Q8BVE3, Q03265, P50516, P56480, Q91VR2, Q9Z1G3                                                                                                 | 0.020997185047584 |
| KEGG_PATHWAY                                                                  | mmu00190:Oxidative phosphorylation               | 19    | 1.7163504968383 | 0.006718490920628 | Q8BVE3, Q9ERS2, Q03265, P50516, Q91WD5, Q9Z1G3, Q9CQ75, Q9DC69, Q91VD9, P50518, Q9CZ13, P56383, P62814, P56480, Q99LC3, Q9DB77, Q91VR2, Q91YT0, Q9D819 | 0.050388681904711 |
| UP_KEYWORDS                                                                   | CF(1)                                            | 3     | 0.2710027100271 | 0.015432129600318 | Q03265, P56480, Q91VR2                                                                                                                                 | 0.044273073300363 |
| GOTERM_CC_DIRECTIGO:0000275~mitochondrial proton-transporting ATPase activity |                                                  | 3     | 0.2710027100271 | 0.01916356698515  | Q03265, P56480, Q91VR2                                                                                                                                 | 0.103446050910132 |
| GOTERM_CC_DIRECTIGO:0045261~proton-transporting ATP synthase                  |                                                  | 3     | 0.2710027100271 | 0.01916356698515  | Q03265, P56480, Q91VR2                                                                                                                                 | 0.103446050910132 |

**Annotation Cluster 55** Enrichment Score: 1.7417696772809872

| Category                                          | Term | Count | %               | PValue            | Genes                                                                          | FDR               |
|---------------------------------------------------|------|-------|-----------------|-------------------|--------------------------------------------------------------------------------|-------------------|
| GOTERM_CC_DIRECTIGO:0005719~nuclear euchromatin   |      | 7     | 0.6323396567299 | 0.002113116610488 | P23198, Q62318, P43275, Q9WTM5, P43277, P15864, P35700                         | 0.017801406597447 |
| GOTERM_MF_DIRECTIGO:0031490~chromatin DNA binding |      | 10    | 0.903342366757  | 0.005124582139399 | Q04207, P28352, P57780, P43274, Q9QZQ8, P43275, Q9WTM5, P43277, P15864, P42227 | 0.081173367033685 |

**Annotation Cluster 56** Enrichment Score: 1.7138615683588552

| Category                                                            | Term                               | Count | %               | PValue            | Genes                                                                                                                                                                                                                                                          | FDR               |
|---------------------------------------------------------------------|------------------------------------|-------|-----------------|-------------------|----------------------------------------------------------------------------------------------------------------------------------------------------------------------------------------------------------------------------------------------------------------|-------------------|
| UP_KEYWORDS                                                         | Electron transport                 | 14    | 1.2646793134598 | 0.000433072707586 | P10639, Q9ERS2, Q8R2E9, Q9CQX2, Q91WD5, Q8R180, Q9CQ75, Q9DC69, Q91VD9, Q8VBT0, Q9CZ13, Q99LC3, Q9DB77, Q91YT0                                                                                                                                                 | 0.001911493330035 |
| KEGG_PATHWAY                                                        | mmu05012:Parkinson's disease       | 22    | 1.9873532068654 | 0.001242876869027 | P51881, Q60931, Q99LX0, Q9ERS2, Q03265, P70677, Q91WD5, P68181, Q9CQ75, Q02053, P62254, Q9DC69, Q91VD9, Q9CZ13, P56383, P05132, P48962, P56480, Q99LC3, Q9DB77, Q91VR2, Q91YT0                                                                                 | 0.014255251366974 |
| KEGG_PATHWAY                                                        | mmu05016:Huntington's disease      | 26    | 2.3486901535682 | 0.002203163948225 | P51881, Q68FD5, Q9ERS2, Q91WD5, P17427, O08788, P17426, P84091, Q9CZ13, P56383, P48962, P56480, Q9DB77, Q91VR2, Q91YT0, P51432, Q60931, Q8VD75, Q03265, P70677, Q9CQ75, Q9DC69, Q91VD9, Q07813, Q99LC3, O89110                                                 | 0.022532358561391 |
| GOTERM_MF_DIRECTIGO:0003954~NADH dehydrogenase activity             |                                    | 5     | 0.4516711833785 | 0.003187755727024 | Q9DC69, Q91VD9, Q9ERS2, Q91WD5, Q91YT0                                                                                                                                                                                                                         | 0.054882527766937 |
| UP_KEYWORDS                                                         | Respiratory chain                  | 9     | 0.8130081300813 | 0.003666049571888 | Q9DC69, Q91VD9, Q9ERS2, Q9CZ13, Q91WD5, Q99LC3, Q9DB77, Q9CQ75, Q91YT0, P51432, P57716, Q91ZX7, Q8VBW6, Q9ERS2, Q03265, P70677, Q91WD5, Q9CQ75, Q9DC69, Q91VD9, Q9JHR7, P63328, P0DP26, Q9CZ13, P56383, P56480, Q99LC3, Q9DB77, Q91VR2, O89110, P49615, Q91YT0 | 0.012513449205378 |
| KEGG_PATHWAY                                                        | mmu05010:Alzheimer's disease       | 23    | 2.0776874435411 | 0.004790994216994 | Q9DC69, Q91VD9, Q9JHR7, P63328, P0DP26, Q9CZ13, P56383, P56480, Q99LC3, Q9DB77, Q91VR2, O89110, P49615, Q91YT0                                                                                                                                                 | 0.041460526877835 |
| GOTERM_CC_DIRECTIGO:0005747~mitochondrial respiratory chain complex |                                    | 8     | 0.7226738934056 | 0.005286818264336 | Q9DC69, Q91VD9, Q99LX0, Q9ERS2, Q91WD5, Q99LC3, Q9CQ75, Q91YT0                                                                                                                                                                                                 | 0.038677249407513 |
| KEGG_PATHWAY                                                        | mmu00190:Oxidative phosphorylation | 19    | 1.7163504968383 | 0.006718490920628 | Q8BVE3, Q9ERS2, Q03265, P50516, Q91WD5, Q9Z1G3, Q9CQ75, Q9DC69, Q91VD9, P50518, Q9CZ13, P56383, P62814, P56480, Q99LC3, Q9DB77, Q91VR2, Q91YT0, Q9D819                                                                                                         | 0.050388681904711 |
| UP_KEYWORDS                                                         | Iron-sulfur                        | 8     | 0.7226738934056 | 0.0120622395728   | Q91VD9, Q80Y14, Q9CQM9, Q8WTY4, Q91WD5, P33610, Q00519, Q91YT0                                                                                                                                                                                                 | 0.035906201519031 |
| GOTERM_CC_DIRECTIGO:0070469~respiratory chain                       |                                    | 8     | 0.7226738934056 | 0.016405448557325 | Q9DC69, Q91VD9, Q9CZ13, Q91WD5, Q99LC3, Q9DB77, Q9CQ75, Q91YT0                                                                                                                                                                                                 | 0.095014889561174 |

| Annotation Cluster 57 |                                               | Enrichment Score: 1.5924540765210637 |                  |                      |                                                                                                                                                                                                                                                                                                                                                                                                                                                                                                                                                                                                                                                                                                                                                                                                                                                                 |  |  |                      |
|-----------------------|-----------------------------------------------|--------------------------------------|------------------|----------------------|-----------------------------------------------------------------------------------------------------------------------------------------------------------------------------------------------------------------------------------------------------------------------------------------------------------------------------------------------------------------------------------------------------------------------------------------------------------------------------------------------------------------------------------------------------------------------------------------------------------------------------------------------------------------------------------------------------------------------------------------------------------------------------------------------------------------------------------------------------------------|--|--|----------------------|
| Category              | Term                                          | Count                                | %                | PValue               | Genes                                                                                                                                                                                                                                                                                                                                                                                                                                                                                                                                                                                                                                                                                                                                                                                                                                                           |  |  | FDR                  |
| KEGG_PATHWAY          | mmu00040:Penicillin biosynthesis              | 9                                    | 0.8130081300813  | 0.001419365558631    | Q8VEE0, P45376, Q9JII6, Q99KP3, P45377, Q6ZQM8, Q91X52, Q91ZJ5, P21300                                                                                                                                                                                                                                                                                                                                                                                                                                                                                                                                                                                                                                                                                                                                                                                          |  |  | 0.015207488128184    |
| Annotation Cluster 58 |                                               | Enrichment Score: 1.5901471719408036 |                  |                      |                                                                                                                                                                                                                                                                                                                                                                                                                                                                                                                                                                                                                                                                                                                                                                                                                                                                 |  |  |                      |
| Category              | Term                                          | Count                                | %                | PValue               | Genes                                                                                                                                                                                                                                                                                                                                                                                                                                                                                                                                                                                                                                                                                                                                                                                                                                                           |  |  | FDR                  |
| INTERPRO              | IPR000608:Ubiquitin-conjugating enzyme, E2    | 10                                   | 0.903342366757   | 9.51590216515237E-05 | P62254, Q9CZY3, O88738, Q7TSS2, Q9Z255, P61087, P63280, Q9D2M8, P61082, Q8CFI2                                                                                                                                                                                                                                                                                                                                                                                                                                                                                                                                                                                                                                                                                                                                                                                  |  |  | 0.005757120809917    |
| INTERPRO              | IPR016135:Ubiquitin-conjugating enzyme/RWD    | 10                                   | 0.903342366757   | 0.00086976061392     | P62254, Q9CZY3, O88738, Q7TSS2, Q9Z255, P61087, P63280, Q9D2M8, P61082, Q8CFI2                                                                                                                                                                                                                                                                                                                                                                                                                                                                                                                                                                                                                                                                                                                                                                                  |  |  | 0.03348578363592     |
| GOTERM_MF_DIRECT      | GO:0061631~ubiquitin conjugating enzyme activ | 8                                    | 0.7226738934056  | 0.000901035192714    | P62254, Q9CZY3, O88738, Q7TSS2, Q9Z255, P61087, Q9D2M8, Q8CFI2                                                                                                                                                                                                                                                                                                                                                                                                                                                                                                                                                                                                                                                                                                                                                                                                  |  |  | 0.01980360327815     |
| Annotation Cluster 59 |                                               | Enrichment Score: 1.5655942110235401 |                  |                      |                                                                                                                                                                                                                                                                                                                                                                                                                                                                                                                                                                                                                                                                                                                                                                                                                                                                 |  |  |                      |
| Category              | Term                                          | Count                                | %                | PValue               | Genes                                                                                                                                                                                                                                                                                                                                                                                                                                                                                                                                                                                                                                                                                                                                                                                                                                                           |  |  | FDR                  |
| UP_KEYWORDS           | GTP-binding                                   | 25                                   | 2.2583559168925  | 0.005331362786702    | Q9Z0N1, Q922F4, Q9R1T4, Q69ZS7, Q5U3K5, Q9WTP7, P59325, Q05D44, P61027, P62835, P42208, P46664, P47758, Q80UG5, O35626, P53994, P36916, Q9QXB9, P32233, O08810, Q3UM18, P84096, Q8R050, P61750, P58252                                                                                                                                                                                                                                                                                                                                                                                                                                                                                                                                                                                                                                                          |  |  | 0.017060360917446    |
| Annotation Cluster 60 |                                               | Enrichment Score: 1.498917995608888  |                  |                      |                                                                                                                                                                                                                                                                                                                                                                                                                                                                                                                                                                                                                                                                                                                                                                                                                                                                 |  |  |                      |
| Category              | Term                                          | Count                                | %                | PValue               | Genes                                                                                                                                                                                                                                                                                                                                                                                                                                                                                                                                                                                                                                                                                                                                                                                                                                                           |  |  | FDR                  |
| UP_KEYWORDS           | DNA recombination                             | 9                                    | 0.8130081300813  | 0.0076957041669      | Q8VEE4, P97386, P28352, P60122, Q99K48, Q9WMT5, Q9WUP7, P37913, Q9CQ71                                                                                                                                                                                                                                                                                                                                                                                                                                                                                                                                                                                                                                                                                                                                                                                          |  |  | 0.024322225515139    |
| UP_KEYWORDS           | DNA repair                                    | 19                                   | 1.7163504968383  | 0.039224068780859    | P62908, P97386, P28352, Q9Z255, Q3U1J4, Q99K48, O35593, Q9WMT5, Q9WUP7, P11103, P39749, P37913, Q9CQ71, P54726, Q8VEE4, Q8VUJ6, Q9JLV6, P60122, P17918                                                                                                                                                                                                                                                                                                                                                                                                                                                                                                                                                                                                                                                                                                          |  |  | 0.096551553922115    |
| Annotation Cluster 61 |                                               | Enrichment Score: 1.493796451874483  |                  |                      |                                                                                                                                                                                                                                                                                                                                                                                                                                                                                                                                                                                                                                                                                                                                                                                                                                                                 |  |  |                      |
| Category              | Term                                          | Count                                | %                | PValue               | Genes                                                                                                                                                                                                                                                                                                                                                                                                                                                                                                                                                                                                                                                                                                                                                                                                                                                           |  |  | FDR                  |
| UP_KEYWORDS           | Transferase                                   | 104                                  | 9.39476061427281 | 1.27798352765814E-05 | Q91YR5, Q9CWQ0, Q8K1R7, Q62407, Q9WTP7, Q9DBL7, P11440, P68181, Q61036, Q8CAY6, Q9JK38, P12382, O88738, Q9JLV6, Q9Z120, Q6P9R2, P09411, P49138, P10649, Q9DBC7, Q91YQ5, P22907, Q64674, P18654, Q8K183, O54734, O09131, Q91WU5, P23492, Q9Z255, Q80X41, Q80WS3, Q93092, P33610, Q91ZJ5, P62254, Q8CIG8, Q8JZK9, Q91V92, Q9JJ78, P04184, P47856, P47857, Q8CFI2, Q7TSS2, Q8BWU5, O35654, Q64261, P08030, Q04447, Q5DW34, Q9D1G2, Q8BH69, Q8CIN4, P05201, Q61510, B2RQC6, P19096, Q8CGY8, Q07832, P30285, Q9CS42, Q8BY71, Q3THS6, Q1HFFZ0, Q9JKX6, P05132, P49615, Q3TX08, Q8CFV9, Q9WV85, Q3TRM8, P13439, Q9JLI6, Q9Z2A0, Q9DBG6, Q09200, P70218, Q68FH4, Q9D270, Q99K85, Q91YL3, O70551, O70310, P11103, Q9R0N0, Q99KQ4, Q3TW96, P31750, Q9CQ65, Q9CWJ9, Q9QZL0, Q04899, Q03963, P61087, O54988, Q6ZQM8, Q8VE10, Q9ESL4, A2BDX3, Q64737, P26450, P97930, Q9WUA3 |  |  | 7.60846007163918E-05 |
| GOTERM_MF_DIRECT      | GO:0016740~transferase activity               | 101                                  | 9.12375790424571 | 0.001291103371942    | Q91YR5, Q9CWQ0, Q8K1R7, Q62407, Q9WTP7, Q9DBL7, P11440, P68181, Q61036, Q8CAY6, Q9JK38, P12382, Q9JLV6, Q9Z120, Q6P9R2, P49138, P10649, Q91YQ5, P22907, Q64674, P18654, Q8K183, O54734, O09131, Q91WU5, P23492, Q9CXY6, Q9Z255, Q80X41, Q80WS3, Q93092, P33610, Q91ZJ5, P62254, Q8CIG8, Q8JZK9, Q91V92, Q9JJ78, P04184, P47856, P47857, Q8CFI2, Q7TSS2, Q8BWU5, O35654, Q64261, P08030, Q04447, Q5DW34, Q9D1G2, Q8BH69, Q8CIN4, P05201, Q61510, B2RQC6, P19096, Q8CGY8, Q07832, P30285, Q9CS42, Q8BY71, Q3THS6, Q1HFFZ0, Q9JKX6, P05132, P49615, Q3TX08, Q8CFV9, Q9WV85, Q3TRM8, P13439, Q9JLI6, Q9Z2A0, Q9DBG6, Q09200, P70218, Q68FH4, Q9D270, Q99K85, Q91YL3, O70551, O70310, P11103, Q9R0N0, Q99KQ4, Q3TW96, P31750, Q9CQ65, Q9CWJ9, Q9QZL0, Q04899, Q03963, P61087, O54988, Q6ZQM8, Q8VE10, Q9ESL4, A2BDX3, Q64737, P97930, Q9WUA3                         |  |  | 0.026151172219924    |
| UP_KEYWORDS           | Kinase                                        | 47                                   | 4.2457091237579  | 0.001401022613587    | Q8K1R7, Q91YL3, O70551, Q62407, Q80X41, Q9WTP7, Q07832, Q9R0N0, P30285, Q9DBL7, P31750, Q9CS42, P11440, P68181, Q61036, P12382, Q9QZL0, Q9JLV6, Q03963, Q04899, Q9JJ78, Q6P9R2, O54988, P09411, P04184, P49138, P05132, P47857, P49615, Q9WV85, Q8CFV9, Q9DBC7, Q9ESL4, Q3TRM8, P26450, P97930, Q9Z2A0, P18654, P70218, Q68FH4, Q64261, Q04447, Q8K183, Q9D1G2, Q8BH69, Q9WUA3, Q8CIN4                                                                                                                                                                                                                                                                                                                                                                                                                                                                          |  |  | 0.005274438074679    |

|                                                                   |                                               |       |                 |                   |                                                                                                                                                                                                        |                   |
|-------------------------------------------------------------------|-----------------------------------------------|-------|-----------------|-------------------|--------------------------------------------------------------------------------------------------------------------------------------------------------------------------------------------------------|-------------------|
| UP_KEYWORDS                                                       | Serine/threonine-protein kinase               | 25    | 2.2583559168925 | 0.045941783224364 | Q8K1R7, O70551, Q62407, Q80X41, Q07832, P30285, P31750, P11440, P68181, Q61036, Q9QZL0, Q03963, Q04899, Q9JJ78, Q6P9R2, O54988, P49138, P05132, P49615, Q9ESL4, Q9Z2A0, P18654, P70218, Q64261, Q8CIN4 | 0.10889904171701  |
| <b>Annotation Cluster 62</b> Enrichment Score: 1.4932023379649095 |                                               |       |                 |                   |                                                                                                                                                                                                        |                   |
| Category                                                          | Term                                          | Count | %               | PValue            | Genes                                                                                                                                                                                                  | FDR               |
| INTERPRO                                                          | IPR007123:Gelsolin domain                     | 5     | 0.4516711833785 | 0.002731916619757 | Q9JJ28, P13020, P24452, Q01405, Q9D662                                                                                                                                                                 | 0.075866668096212 |
| <b>Annotation Cluster 63</b> Enrichment Score: 1.4433117066215926 |                                               |       |                 |                   |                                                                                                                                                                                                        |                   |
| Category                                                          | Term                                          | Count | %               | PValue            | Genes                                                                                                                                                                                                  | FDR               |
| UP_KEYWORDS                                                       | Flavoprotein                                  | 14    | 1.2646793134598 | 0.002649187134765 | Q8CFV9, Q9JMH6, Q8R2E9, Q9JHI5, Q64521, Q8R180, Q9DCN2, Q9DC69, Q9Z0X1, Q8C0L6, Q9JLT4, Q99LC3, Q00519, Q91YT0                                                                                         | 0.009688455807139 |
| UP_KEYWORDS                                                       | FAD                                           | 12    | 1.0840108401084 | 0.009153893761723 | Q9DCN2, Q9DC69, Q8C0L6, Q9Z0X1, Q9JLT4, Q9JMH6, Q8R2E9, Q9JHI5, Q64521, Q99LC3, Q8R180, Q00519                                                                                                         | 0.027897580988109 |
| <b>Annotation Cluster 64</b> Enrichment Score: 1.4369465057455773 |                                               |       |                 |                   |                                                                                                                                                                                                        |                   |
| Category                                                          | Term                                          | Count | %               | PValue            | Genes                                                                                                                                                                                                  | FDR               |
| KEGG_PATHWAY                                                      | mmu00250:Alanine, aspartate and glutamate met | 8     | 0.7226738934056 | 0.011813314709729 | B2RQC6, Q91YI0, P16460, P46664, P47856, P54822, P05201, Q9JHW2                                                                                                                                         | 0.080545327566336 |
| <b>Annotation Cluster 65</b> Enrichment Score: 1.383002609354318  |                                               |       |                 |                   |                                                                                                                                                                                                        |                   |
| Category                                                          | Term                                          | Count | %               | PValue            | Genes                                                                                                                                                                                                  | FDR               |
| INTERPRO                                                          | IPR001440:Tetratricopeptide TPR-1             | 6     | 0.5420054200542 | 0.002981015689982 | Q60864, Q9CYG7, O70145, Q8CGY8, Q9D706, Q64378                                                                                                                                                         | 0.080156199663952 |
| UP_KEYWORDS                                                       | TPR repeat                                    | 13    | 1.1743450767841 | 0.015454207379133 | Q60864, O70145, Q99MD9, Q8CGY8, Q9CR16, Q99L47, Q64378, Q9CYG7, O88447, Q80UM3, Q5SW19, Q9D706, Q9QYI3                                                                                                 | 0.044273073300363 |
| <b>Annotation Cluster 66</b> Enrichment Score: 1.37053037212395   |                                               |       |                 |                   |                                                                                                                                                                                                        |                   |
| Category                                                          | Term                                          | Count | %               | PValue            | Genes                                                                                                                                                                                                  | FDR               |
| GOTERM_CC_DIRECTIGO:0000776-kinetochore                           |                                               | 13    | 1.1743450767841 | 0.009084783990891 | Q9R1T4, Q07832, Q6P5F9, Q08788, Q9DBR7, P63168, A2AGT5, Q9Z0Y1, Q99P69, Q9CWU9, P42208, Q9WVA3, Q8R1Q8                                                                                                 | 0.058059079298105 |
| UP_KEYWORDS                                                       | Centromere                                    | 12    | 1.0840108401084 | 0.021976620650512 | A2AGT5, Q9Z0Y1, Q99P69, Q9R1T4, Q07832, P42208, Q9CWU9, P62715, Q9WVA3, Q8BK67, Q8R1Q8, Q76MZ3                                                                                                         | 0.059221209331905 |
| UP_KEYWORDS                                                       | Kinetochore                                   | 9     | 0.8130081300813 | 0.041055078269062 | A2AGT5, Q9Z0Y1, Q99P69, Q9R1T4, Q07832, P42208, Q9CWU9, Q9WVA3, Q8R1Q8                                                                                                                                 | 0.098618365666622 |
| <b>Annotation Cluster 67</b> Enrichment Score: 1.3394336802536475 |                                               |       |                 |                   |                                                                                                                                                                                                        |                   |
| Category                                                          | Term                                          | Count | %               | PValue            | Genes                                                                                                                                                                                                  | FDR               |
| UP_KEYWORDS                                                       | Iron-sulfur                                   | 8     | 0.7226738934056 | 0.0120622395728   | Q91VD9, Q80Y14, Q9CQM9, Q8WTY4, Q91WD5, P33610, Q00519, Q91YT0                                                                                                                                         | 0.035906201519031 |
| <b>Annotation Cluster 68</b> Enrichment Score: 1.1812525374926601 |                                               |       |                 |                   |                                                                                                                                                                                                        |                   |
| Category                                                          | Term                                          | Count | %               | PValue            | Genes                                                                                                                                                                                                  | FDR               |
| UP_KEYWORDS                                                       | SH3 domain                                    | 16    | 1.4453477868112 | 0.024611048802757 | P27870, O70145, P26450, Q80TY0, A2AAY5, Q62418, Q9Z0R6, P97369, O08539, Q61792, P70248, P97814, Q62422, Q8CBW3, Q9JLQ0, Q9Z0U1                                                                         | 0.06495287106707  |
| <b>Annotation Cluster 69</b> Enrichment Score: 1.1747530875240222 |                                               |       |                 |                   |                                                                                                                                                                                                        |                   |
| Category                                                          | Term                                          | Count | %               | PValue            | Genes                                                                                                                                                                                                  | FDR               |
| UP_KEYWORDS                                                       | Signal recognition particle                   | 3     | 0.2710027100271 | 0.030686276724526 | Q9D7A6, P49962, Q8BMA6                                                                                                                                                                                 | 0.077779077638404 |
| <b>Annotation Cluster 70</b> Enrichment Score: 1.1563978735527476 |                                               |       |                 |                   |                                                                                                                                                                                                        |                   |
| Category                                                          | Term                                          | Count | %               | PValue            | Genes                                                                                                                                                                                                  | FDR               |
| SMART                                                             | SM00360:RRM                                   | 20    | 1.806684733514  | 0.00439818298197  | Q9CX86, Q91WT8, Q9CPN8, Q9JLI8, P97379, P29341, Q99K48, Q9Z1D1, P97855, P32067, Q9D883, Q62189, Q3UEB3, Q8BGD9, Q8VIJ6, O08583, Q6NVF9, Q8R4X3, Q8C166, Q9CQI7                                         | 0.092023520853528 |

|                                                                   |                                                |       |                 |                      |                                                                                                                                                        |                   |
|-------------------------------------------------------------------|------------------------------------------------|-------|-----------------|----------------------|--------------------------------------------------------------------------------------------------------------------------------------------------------|-------------------|
| <b>Annotation Cluster 71</b> Enrichment Score: 1.1027721989192003 |                                                |       |                 |                      |                                                                                                                                                        |                   |
| Category                                                          | Term                                           | Count | %               | PValue               | Genes                                                                                                                                                  | FDR               |
| INTERPRO                                                          | IPR010987:Glutathione S-transferase, C-termina | 8     | 0.7226738934056 | 0.003979306568255    | P10649, Q68FL6, Q9Z1Q9, Q8CGC7, Q9D8N0, O09131, Q9ER72, Q9QYB1                                                                                         | 0.103959725254541 |
| <b>Annotation Cluster 72</b> Enrichment Score: 1.081642017702263  |                                                |       |                 |                      |                                                                                                                                                        |                   |
| Category                                                          | Term                                           | Count | %               | PValue               | Genes                                                                                                                                                  | FDR               |
| SMART                                                             | SM00185:ARM                                    | 8     | 0.7226738934056 | 0.001863466739234    | O35643, Q8BNU0, O35344, P30999, E9PVA8, P70188, P52293, P70168                                                                                         | 0.047065879817901 |
| <b>Annotation Cluster 73</b> Enrichment Score: 1.0628183391633939 |                                                |       |                 |                      |                                                                                                                                                        |                   |
| Category                                                          | Term                                           | Count | %               | PValue               | Genes                                                                                                                                                  | FDR               |
| GOTERM_CC_DIRECT                                                  | GO:0031105--septin complex                     | 3     | 0.2710027100271 | 0.01916356698515     | Q9R1T4, P42208, Q80UG5                                                                                                                                 | 0.103446050910132 |
| <b>Annotation Cluster 74</b> Enrichment Score: 1.0317128870571977 |                                                |       |                 |                      |                                                                                                                                                        |                   |
| Category                                                          | Term                                           | Count | %               | PValue               | Genes                                                                                                                                                  | FDR               |
| UP_KEYWORDS                                                       | Helicase                                       | 17    | 1.5356820234869 | 8.47286965413036E-05 | Q61655, Q91VR5, P97310, Q6NZQ2, P97311, Q9WTM5, P97855, Q61881, Q62167, P54823, Q6NVF4, Q91VC3, P49718, Q9EPU0, P49717, P60122, P25206                 | 0.000433810926291 |
| GOTERM_MF_DIRECT                                                  | GO:0004386--helicase activity                  | 16    | 1.4453477868112 | 0.002155823400252    | Q61655, Q91VR5, P97310, Q6NZQ2, P97311, Q9WTM5, P97855, Q61881, Q62167, P54823, Q6NVF4, P49718, Q9EPU0, P49717, P60122, P25206                         | 0.039767242365354 |
| <b>Annotation Cluster 75</b> Enrichment Score: 1.030979709984985  |                                                |       |                 |                      |                                                                                                                                                        |                   |
| Category                                                          | Term                                           | Count | %               | PValue               | Genes                                                                                                                                                  | FDR               |
| UP_KEYWORDS                                                       | mRNA transport                                 | 9     | 0.8130081300813 | 0.024564702983462    | Q61655, O08583, Q9CPN8, Q3U0V1, P63242, P97379, Q6P5F9, Q9CWU9, Q91VC3                                                                                 | 0.06495287106707  |
| <b>Annotation Cluster 76</b> Enrichment Score: 1.0109753771736083 |                                                |       |                 |                      |                                                                                                                                                        |                   |
| Category                                                          | Term                                           | Count | %               | PValue               | Genes                                                                                                                                                  | FDR               |
| KEGG_PATHWAY                                                      | mmu03430:Mismatch repair                       | 6     | 0.5420054200542 | 0.014944953607737    | Q8VEE4, O35654, P17918, P37913, Q9CQ71, Q9WUK4                                                                                                         | 0.096074701764022 |
| <b>Annotation Cluster 77</b> Enrichment Score: 0.9776539255190654 |                                                |       |                 |                      |                                                                                                                                                        |                   |
| Category                                                          | Term                                           | Count | %               | PValue               | Genes                                                                                                                                                  | FDR               |
| UP_KEYWORDS                                                       | Porphyrin biosynthesis                         | 3     | 0.2710027100271 | 0.039819611969733    | P10518, P70697, P22907                                                                                                                                 | 0.097084006326207 |
| <b>Annotation Cluster 78</b> Enrichment Score: 0.9339610750739368 |                                                |       |                 |                      |                                                                                                                                                        |                   |
| Category                                                          | Term                                           | Count | %               | PValue               | Genes                                                                                                                                                  | FDR               |
| KEGG_PATHWAY                                                      | mmu00061:Fatty acid biosynthesis               | 5     | 0.4516711833785 | 0.012717496126741    | P19096, Q9CZW4, E9Q4Z2, Q9QUJ7, P41216                                                                                                                 | 0.084159900838725 |
| <b>Annotation Cluster 79</b> Enrichment Score: 0.8819368888420165 |                                                |       |                 |                      |                                                                                                                                                        |                   |
| Category                                                          | Term                                           | Count | %               | PValue               | Genes                                                                                                                                                  | FDR               |
| UP_KEYWORDS                                                       | Pyridoxal phosphate                            | 7     | 0.6323396567299 | 0.035673662612028    | Q99K85, P19096, Q9JL16, Q9Z2Y8, Q99K01, Q8VCN5, P05201                                                                                                 | 0.088664637171644 |
| <b>Annotation Cluster 80</b> Enrichment Score: 0.8373544318199488 |                                                |       |                 |                      |                                                                                                                                                        |                   |
| Category                                                          | Term                                           | Count | %               | PValue               | Genes                                                                                                                                                  | FDR               |
| KEGG_PATHWAY                                                      | mmu05161:Hepatitis B                           | 19    | 1.7163504968383 | 0.011033435037741    | Q9CQV8, Q60931, Q3U1J4, P26450, P68254, Q60591, P30285, P70677, P31750, Q62167, P52633, P42225, P63101, Q04207, Q07813, Q64261, P17918, P42227, O89110 | 0.077578840109118 |
| <b>Annotation Cluster 81</b> Enrichment Score: 0.4714760870474071 |                                                |       |                 |                      |                                                                                                                                                        |                   |
| Category                                                          | Term                                           | Count | %               | PValue               | Genes                                                                                                                                                  | FDR               |
| UP_KEYWORDS                                                       | Protein phosphatase                            | 11    | 0.9936766034327 | 0.041219395024721    | Q9D358, Q9D967, P29351, P63328, Q9DAK9, Q61074, Q8CHP8, P62715, Q8BUM3, P62137, Q9D7X3                                                                 | 0.098618365666622 |
