# Supplementary material for: Does size matter? A proteomics-informed comparison of the effects of polystyrene beads of different sizes on macrophages
Source: Royal Society of Chemistry journal article supplement (doi:10.1039/d2en00214k), 2022-01-01
Supplement: d2en00214k5.pdf [file d2en00214k5.pdf]

**Supplementary Table 11: results of the pathway analysis by the David tool on the proteins modulated in response to 10 micrometers polystyrene particles**

selection of clusters by a FDR cutoff value of 0.1

**Annotation Cluster 1** Enrichment Score: 36.65196702650441

| Category         | Term                                                       | Count | %                | PValue               | Genes                                                                                                                                                                                                                                                                                                                                                                                                                                                                                                                                                                                                                                                                                                   | FDR                  |
|------------------|------------------------------------------------------------|-------|------------------|----------------------|---------------------------------------------------------------------------------------------------------------------------------------------------------------------------------------------------------------------------------------------------------------------------------------------------------------------------------------------------------------------------------------------------------------------------------------------------------------------------------------------------------------------------------------------------------------------------------------------------------------------------------------------------------------------------------------------------------|----------------------|
| GOTERM_MF_DIRECT | GO:0098641~cadherin binding involved in cell-cell adhesion | 84    | 7.56756756756757 | 3.52486769465201E-41 | Q61510, Q70456, Q62448, P70460, Q9D8U8, P19096, Q9Z0P5, Q8BTM8, Q61792, Q62167, Q6PAR5, Q8CBW3, Q80U87, P42225, Q9JHJ0, O55131, Q91VX2, Q60902, P47753, Q5FWK3, P07356, P84228, Q8BH43, Q8BK64, P51432, P30999, Q62418, Q9CPV4, Q6NZJ6, Q8VDJ3, Q9QXS1, P54823, Q9DBG5, P42932, Q9CWK8, E9PVA8, O88844, Q9JLQ0, P05064, P47226, Q922Q8, P60229, Q9WVA4, Q8BVY0, Q9ERG0, Q9Z0N1, P26040, Q78PY7, P26043, Q62261, Q9JKF1, P59325, Q7TQH0, Q99K01, Q9DCL9, P42567, Q9CWXJ9, P63101, A2AGT5, Q8VDD5, Q9D8B3, O54988, P42208, Q8K298, Q2L4X1, P62259, Q80UG5, P26039, Q8R1F1, Q3UZ39, Q9CQV8, Q8CI51, P10107, Q9D8N0, Q9CZ30, Q9EQP2, P35700, P35821, Q62433, P17182, P22682, Q9WUA3, Q8CIN4, Q9D0I9         | 1.8364560689137E-38  |
| GOTERM_CC_DIRECT | GO:0005913~cell-cell adherens junction                     | 85    | 7.65765765765766 | 2.24156836315111E-40 | Q61510, Q70456, Q62448, P70460, Q9D8U8, P19096, Q9Z0P5, Q8BTM8, Q61792, Q62167, Q6PAR5, Q8CBW3, Q80U87, P42225, Q9JHJ0, O55131, Q91VX2, Q60902, P47753, Q5FWK3, P07356, P84228, Q8BH43, Q8BK64, P51432, O08917, P30999, Q62418, Q9CPV4, Q6NZJ6, Q8VDJ3, Q9QXS1, P54823, Q9DBG5, P42932, Q9CWK8, E9PVA8, O88844, Q9JLQ0, P05064, P47226, Q922Q8, P60229, Q9WVA4, Q8BVY0, Q9ERG0, Q9Z0N1, P26040, Q78PY7, P26043, Q62261, Q9JKF1, P59325, Q7TQH0, Q99K01, Q9DCL9, P42567, Q9CWXJ9, P63101, A2AGT5, Q8VDD5, Q9D8B3, O54988, P42208, Q8K298, Q2L4X1, P62259, Q80UG5, P26039, Q8R1F1, Q3UZ39, Q9CQV8, Q8CI51, P10107, Q9D8N0, Q9CZ30, Q9EQP2, P35700, P35821, Q62433, P17182, P22682, Q9WUA3, Q8CIN4, Q9D0I9 | 3.18302707567457E-38 |
| GOTERM_BP_DIRECT | GO:0098609~cell-cell adhesion                              | 59    | 5.31531531531532 | 1.4008902463901E-30  | O70456, Q62448, P70460, Q9D8U8, Q9Z0P5, Q61792, Q6PAR5, Q8CBW3, Q80U87, P42225, Q91VX2, Q60902, P47753, Q5FWK3, P84228, Q8BH43, Q8BK64, P51432, Q62418, Q9CPV4, Q6NZJ6, Q8VDJ3, Q9QXS1, P54823, Q9DBG5, O88844, P05064, P47226, Q922Q8, P60229, Q9WVA4, Q9ERG0, Q9Z0N1, Q78PY7, P59325, Q7TQH0, Q99K01, Q9DCL9, P42567, Q9CWXJ9, P63101, A2AGT5, O54988, P42208, Q8K298, Q2L4X1, P26039, Q8R1F1, Q3UZ39, Q9CQV8, Q8CI51, Q9D8N0, Q9CZ30, Q9EQP2, P35700, Q62433, P17182, Q9WUA3, Q9D0I9                                                                                                                                                                                                                 | 4.18305827572084E-27 |

**Annotation Cluster 2** Enrichment Score: 21.358089831146827

| Category    | Term               | Count | %                | PValue               | Genes                                                                                                                                                                                                                                                                                                                                                                                                                                                                                                                                                                                                                                                                                                                                                                                                                                                                                                                                                                                                                                                                                                                                                                                                                                                                                                                                                                                                                                                                                                                  | FDR                  |
|-------------|--------------------|-------|------------------|----------------------|------------------------------------------------------------------------------------------------------------------------------------------------------------------------------------------------------------------------------------------------------------------------------------------------------------------------------------------------------------------------------------------------------------------------------------------------------------------------------------------------------------------------------------------------------------------------------------------------------------------------------------------------------------------------------------------------------------------------------------------------------------------------------------------------------------------------------------------------------------------------------------------------------------------------------------------------------------------------------------------------------------------------------------------------------------------------------------------------------------------------------------------------------------------------------------------------------------------------------------------------------------------------------------------------------------------------------------------------------------------------------------------------------------------------------------------------------------------------------------------------------------------------|----------------------|
| UP_KEYWORDS | Nucleotide-binding | 183   | 16.4864864864865 | 4.36820872122404E-32 | Q8K1R7, Q8CG48, Q6NZQ2, Q61316, O70133, Q62407, Q9WTP7, Q8K1J6, Q9DBL7, Q922B2, P11440, P68181, P12382, O55131, Q9EPU0, Q8BML9, Q9JLV6, P62196, Q6P9R2, P46664, Q8BU30, Q569Z6, P05213, Q9DBC7, Q9QXB9, Q03265, Q9ER72, P18654, Q02053, P84096, Q68FL6, Q8K183, O88685, Q9JHU4, P32921, Q61655, Q6P9P6, Q91VR5, Q8BG51, Q2NL51, Q9R1T4, Q80X41, Q5SUR0, Q9DCL9, P61161, Q8CGC7, Q8VDD5, Q9CZD3, Q91V92, Q8BMJ2, Q9QVP9, P04184, P26638, P23249, P42208, P27601, P56380, P47857, Q8CFI2, Q80UG5, Q7TSS2, Q9CZ30, P68372, Q3V1L4, P32233, Q6PA06, Q05144, Q9D2R0, Q3UDE2, P68369, O54950, P68368, Q61390, Q64261, Q04447, Q99LE6, Q8BH69, P43247, Q8CIN4, P54775, Q8BFR5, P97386, Q8C0C7, B2RQC6, Q922F4, P46471, Q61879, Q9D2Y4, Q8VE47, Q9CS42, Q62167, P63085, P61222, Q9JHR7, Q9Z1F9, Q3THS6, P46467, P05132, P41216, P49615, Q8R1Q8, Q8CFV9, Q9WV85, Q91WQ3, P97310, Q64518, P46460, P97311, Q3TRM8, Q9WTM5, O08638, Q9Z2A0, P70698, Q6NVF4, P54823, Q9JIK5, P42932, Q8R050, Q68FH4, P61750, Q8BP47, Q3UQ84, Q9Z2I9, Q9QXG4, Q91W86, Q8VCW8, Q61699, P28740, P54276, Q9Z0N1, Q91YL3, O70551, Q9R0N0, P35279, P11983, P50516, P59325, P70248, P31750, Q922D8, P62331, P49718, O54984, Q04899, Q9D6F9, Q03963, Q9QUJ7, O54988, Q8K4Z3, P62334, Q9D7H3, Q35626, P80315, P80314, Q9Z1Q9, Q9ESL4, Q9CQN1, P80313, A2BDX3, Q64737, Q61183, P97930, P51855, Q9EQP2, P62192, Q99M31, Q3THK7, Q3UM18, Q9DOR2, Q9WUA2, P84078, P35276, P51859, Q6URW6, Q9WUA3, P28867, P80318, P80317, Q6P542, Q8BGQ7, Q9D0I9, P80316, E9PVX6 | 2.97038193043235E-30 |

|                                               |             |     |                                                                                                                                                                                                                                                                                                                                                                                                                                                                                                                                                                                                                                                                                                                                                                                                                                                                                                                                                                                                                                                                                                                                                                                                                                                                                                                                                                                                                                                                                                                                                                                                                                                                                                                                                                                                                                                                                                                                                                                                                                                                                                                                                                                                                                                                                                                                                                                                                                                                                                                                                                                                                                                                                                                                                                                                                                                                                            |                      |
|-----------------------------------------------|-------------|-----|--------------------------------------------------------------------------------------------------------------------------------------------------------------------------------------------------------------------------------------------------------------------------------------------------------------------------------------------------------------------------------------------------------------------------------------------------------------------------------------------------------------------------------------------------------------------------------------------------------------------------------------------------------------------------------------------------------------------------------------------------------------------------------------------------------------------------------------------------------------------------------------------------------------------------------------------------------------------------------------------------------------------------------------------------------------------------------------------------------------------------------------------------------------------------------------------------------------------------------------------------------------------------------------------------------------------------------------------------------------------------------------------------------------------------------------------------------------------------------------------------------------------------------------------------------------------------------------------------------------------------------------------------------------------------------------------------------------------------------------------------------------------------------------------------------------------------------------------------------------------------------------------------------------------------------------------------------------------------------------------------------------------------------------------------------------------------------------------------------------------------------------------------------------------------------------------------------------------------------------------------------------------------------------------------------------------------------------------------------------------------------------------------------------------------------------------------------------------------------------------------------------------------------------------------------------------------------------------------------------------------------------------------------------------------------------------------------------------------------------------------------------------------------------------------------------------------------------------------------------------------------------------|----------------------|
| UP_KEYWORDS                                   | ATP-binding | 147 | <p>Q8K1R7, Q8CG48, Q6NZQ2, Q61316, O70133, Q62407, Q8K1J6, Q9DBL7, Q922B2, P11440, P68181, P12382, Q9EPU0, Q8BML9, Q9JLV6, P62196, Q6P9R2, Q8BU30, Q569Z6, Q03265, Q9ER72, P18654, Q02053, Q68FL6, Q8K183, O88685, Q9JHU4, P32921, Q61655, Q6P9P6, Q91VR5, Q2NLS1, Q80X41, Q5SUR0, Q9DCL9, P61161, Q8CGC7, Q8VDD5, Q9CZD3, Q91V92, Q8BMJ2, Q9QVP9, P04184, P26638, P23249, P47857, Q8CFI2, Q7TSS2, Q9CZ30, Q9D2R0, Q3UDE2, O54950, Q61390, Q64261, Q04447, Q99LE6, Q8BH69, P43247, Q8CIN4, P54775, P97386, Q8COC7, B2RQC6, P46471, Q61879, Q9D2Y4, Q8VE47, Q9CS42, Q62167, P63085, P61222, Q8CFV9, Q9WV85, Q91WQ3, P97310, Q64518, P46460, P97311, Q3TRM8, Q9WTM5, O08638, Q9Z2A0, P70698, Q6NVF4, P54823, Q9JIK5, P42932, Q68FH4, Q8BP47, Q3UQ84, Q9Z2I9, Q9QXG4, Q8VCW8, Q61699, P28740, P54276, Q91YL3, O70551, Q9R0N0, P11983, P50516, P70248, P31750, Q922D8, P49718, O54984, Q04899, Q03963, Q9QUJ7, O54988, P62334, Q9D7H3, P80315, P80314, Q9Z1Q9, Q9ESL4, Q9CQN1, P80313, A2BDX3, Q64737, Q61183, P97930, P51855, Q9EQP2, P62192, Q99M31, Q3THK7, Q9D0R2, Q9WUA2, Q6URW6, Q9WUA3, P28867, P80318, P80317, Q6P542, Q8BGQ7, Q9D0I9, P80316, E9PVX6</p> <p>Q8BL97, Q61316, O70133, Q62407, Q9WTP7, Q8K1J6, P11440, Q9JLV6, Q6P9R2, P46664, P05213, Q569Z6, Q9DBC7, P18654, O88569, Q8K183, O88685, P32921, Q6P9P6, Q61655, Q91VR5, Q921F4, Q80X41, Q99K48, Q9Z1D1, P61161, Q9CZD3, Q8BMJ2, P47857, P56380, Q8CFI2, Q9CZ30, P32233, P68372, Q6PA06, Q64012, Q05144, Q9D2R0, P68369, O08583, P68368, Q64261, Q8R4X3, Q99LE6, P43247, Q8CIN4, Q8BFR5, Q8COC7, B2RQC6, P46471, Q9D2Y4, Q8VE47, O35326, P63085, P61222, Q9JHR7, P46467, P05132, P41216, P49615, Q9Z204, Q64518, P97310, Q3TRM8, P46460, P97311, Q9JL8, Q9WTM5, O08638, Q9Z2A0, Q6A0A2, Q6NVF4, P54823, Q8R050, Q68FH4, Q8BP47, Q3UQ84, Q9QXG4, Q91W86, Q61699, P54276, Q9Z0N1, Q91YL3, O70551, Q9CY64, P31750, P62331, P49718, Q5SF07, O54984, Q03963, O54988, P62334, P80315, P80314, P80313, Q9Z1Q9, Q64737, Q9EQP2, Q3THK7, Q61464, Q3UM18, Q9D0R2, Q9WUA2, Q6URW6, P24547, Q9WUA3, P80318, P80317, Q8BGQ7, P80316, E9PVX6, P09405, Q8K1R7, Q8CG48, Q6NZQ2, Q9DBL7, Q922B2, P68181, P12382, O55131, Q9EPU0, P62196, Q8BU30, Q6NV83, Q9QXB9, Q03265, Q9ER72, Q02053, P84096, Q68FL6, Q9JHU4, Q8R4R6, Q9CX86, Q8BG51, Q9R1T4, Q2NLS1, Q6PFR5, Q5SUR0, Q9DCL9, Q8CGC7, Q8VDD5, Q91V92, Q9QVP9, P04184, P23249, P26638, P42208, P27601, O35309, Q80UG5, Q7TSS2, Q3V1L4, Q8BGD9, Q3UDE2, O54950, Q61390, Q04447, Q8BH69, P54775, P97386, Q922F4, Q61879, Q9CS42, Q62167, Q3THS6, Q9Z1F9, Q8R1Q8, Q8CFV9, Q9WV85, Q91WQ3, Q9CPN8, P70698, Q9JIK5, P42932, P61750, Q9Z2I9, Q8VCW8, P28740, Q9R0N0, P35279, P11983, P50516, P59325, P70248, Q922D8, Q04899, Q9D6F9, Q9QUJ7, Q8K4Z3, Q9D7H3, O35626, Q8VE97, Q9ESL4, Q9CQN1, A2BDX3, Q61183, P97930, P51855, P62192, Q99M31, P84078, P35276, P51859, P28867, Q6P542, Q9D0I9</p> | 3.1181307975757E-25  |
| GOTERM_MF_DIRECTGO:0000166~nucleotide binding |             | 207 | <p>18.6486486486487 3.37407760812277E-26</p>                                                                                                                                                                                                                                                                                                                                                                                                                                                                                                                                                                                                                                                                                                                                                                                                                                                                                                                                                                                                                                                                                                                                                                                                                                                                                                                                                                                                                                                                                                                                                                                                                                                                                                                                                                                                                                                                                                                                                                                                                                                                                                                                                                                                                                                                                                                                                                                                                                                                                                                                                                                                                                                                                                                                                                                                                                               | 1.17192962255464E-23 |

|                                                                  |                   |                  |                      |                                                                                                                                                                                                                                                                                                                                                                                                                                                                                                                                                                                                                                                                                                                                                                                                                                                                                                                                                                                                                                                                                                                                                                                                                                                                                                                                                                                                                                                                                                                                                                                                                                                                                                                                                                                                                                                                                                                                                                                                                                       |                                                                                                                                                                                                                                                                                                                                                                                                                                                                                                                                                                                                                                                                                                                                                                                                                                                                                                                                                                                                                                                                                                                                                                                                                                                                                                                                                                                                     |                      |
|------------------------------------------------------------------|-------------------|------------------|----------------------|---------------------------------------------------------------------------------------------------------------------------------------------------------------------------------------------------------------------------------------------------------------------------------------------------------------------------------------------------------------------------------------------------------------------------------------------------------------------------------------------------------------------------------------------------------------------------------------------------------------------------------------------------------------------------------------------------------------------------------------------------------------------------------------------------------------------------------------------------------------------------------------------------------------------------------------------------------------------------------------------------------------------------------------------------------------------------------------------------------------------------------------------------------------------------------------------------------------------------------------------------------------------------------------------------------------------------------------------------------------------------------------------------------------------------------------------------------------------------------------------------------------------------------------------------------------------------------------------------------------------------------------------------------------------------------------------------------------------------------------------------------------------------------------------------------------------------------------------------------------------------------------------------------------------------------------------------------------------------------------------------------------------------------------|-----------------------------------------------------------------------------------------------------------------------------------------------------------------------------------------------------------------------------------------------------------------------------------------------------------------------------------------------------------------------------------------------------------------------------------------------------------------------------------------------------------------------------------------------------------------------------------------------------------------------------------------------------------------------------------------------------------------------------------------------------------------------------------------------------------------------------------------------------------------------------------------------------------------------------------------------------------------------------------------------------------------------------------------------------------------------------------------------------------------------------------------------------------------------------------------------------------------------------------------------------------------------------------------------------------------------------------------------------------------------------------------------------|----------------------|
| GOTERM_MF_DIRECTGO:0005524~ATP binding                           | 154               | 13.8738738738739 | 2.33827200943817E-17 | <p>Q8K1R7, Q8CG48, Q6NZQ2, Q61316, O70133, Q9Z0P5, Q62407, Q9WTP7, Q8K1J6, Q9DBL7, Q922B2, P11440, P68181, P12382, Q9EPU0, Q8BML9, Q9JLV6, P62196, Q6P9R2, Q8BU30, Q569Z6, Q03265, Q9ER72, P18654, Q02053, Q68FL6, Q8K183, O88685, Q9JHU4, P32921, Q9CXY6, Q61655, Q6P9P6, Q91VR5, Q2NL51, Q80X41, Q5SUR0, Q9DCL9, P61161, Q8CGC7, Q8VDD5, Q9CZD3, Q91V92, Q8BMJ2, Q9QVP9, P04184, P26638, P23249, P62814, P47857, Q8CFI2, Q9JK91, Q7TSS2, Q9CZ30, Q9D2R0, Q3UDE2, O54950, Q61390, Q64261, Q04447, Q99LE6, Q8BH69, P43247, Q8CIN4, P54775, P97386, Q8C0C7, B2RQC6, P46471, Q61879, Q9D2Y4, Q8VE47, Q9CS42, Q62167, P63085, P61222, Q9JHR7, Q9Z1F9, Q3THS6, P46467, P05132, P41216, P49615, Q8R1Q8, Q8CFV9, Q9WV85, Q91WQ3, P97310, Q64518, P46460, P97311, Q3TRM8, Q9WVTM5, O08638, Q9Z2A0, P70698, Q6NVF4, P54823, Q9JIK5, P42932, Q68FH4, Q8BP47, Q3UQ84, Q9Z2I9, Q9QXG4, Q8VCW8, Q61699, P28740, P54276, Q91YL3, O70551, Q6P5D8, Q9R0N0, P11983, P50516, P70248, P31750, Q922D8, P49718, O54984, Q04899, Q03963, Q9QUJ7, P82343, O54988, P62334, Q9D7H3, P80315, P80314, Q9Z1Q9, Q9ESL4, Q9CQN1, P80313, A2BDX3, Q64737, Q61183, P97930, P51855, Q9EQP2, P62192, Q99M31, Q3THK7, Q9D0R2, Q9WUA2, Q6URW6, Q9WUA3, P28867, P80318, P80317, Q6P542, Q8BGQ7, Q9D0I9, P80316, E9PVX6</p> <p>P54775, Q8CG48, Q8K1R7, O70133, P46471, Q61879, Q62407, Q9DBL7, Q62167, Q9CS42, P11440, P68181, P12382, Q9EPU0, Q9JLV6, P63085, P62196, Q3THS6, Q9Z1F9, Q6P9R2, P46467, P05132, Q8R1Q8, P49615, Q569Z6, P97310, P46460, P97311, Q3TRM8, Q03265, Q9WVTM5, O08638, Q9Z2A0, P54823, P18654, Q9JIK5, Q02053, Q68FH4, Q8K183, O88685, Q9JHU4, Q8VCW8, Q6P9P6, Q61655, Q91VR5, P28740, P54276, Q91YL3, O70551, Q2NL51, Q80X41, Q9R0N0, P50516, P70248, P31750, Q5SUR0, Q922D8, P61161, P49718, Q8CGC7, Q8VDD5, Q9CZD3, O54984, Q91V92, Q03963, Q04899, Q9QVP9, O54988, P04184, P26638, P23249, P62334, P47857, Q9ESL4, Q64737, Q9CZ30, P97930, P51855, Q9EQP2, P62192, Q3THK7, Q64261, Q04447, Q6URW6, Q8BH69, Q9WUA3, P28867, P43247, Q8CIN4</p> | 6.09119858458644E-15                                                                                                                                                                                                                                                                                                                                                                                                                                                                                                                                                                                                                                                                                                                                                                                                                                                                                                                                                                                                                                                                                                                                                                                                                                                                                                                                                                                |                      |
| UP_SEQ_FEATURE nucleotide phosphate-binding region:ATP           | 89                | 8.01801801801802 | 8.2016632734935E-08  | <p>P54775, Q8CG48, Q8K1R7, O70133, P46471, Q61879, Q62407, Q9DBL7, Q62167, Q9CS42, P11440, P68181, P12382, Q9EPU0, Q9JLV6, P63085, P62196, Q3THS6, Q9Z1F9, Q6P9R2, P46467, P05132, Q8R1Q8, P49615, Q569Z6, P97310, P46460, P97311, Q3TRM8, Q03265, Q9WVTM5, O08638, Q9Z2A0, P54823, P18654, Q9JIK5, Q02053, Q68FH4, Q8K183, O88685, Q9JHU4, Q8VCW8, Q6P9P6, Q61655, Q91VR5, P28740, P54276, Q91YL3, O70551, Q2NL51, Q80X41, Q9R0N0, P50516, P70248, P31750, Q5SUR0, Q922D8, P61161, P49718, Q8CGC7, Q8VDD5, Q9CZD3, O54984, Q91V92, Q03963, Q04899, Q9QVP9, O54988, P04184, P26638, P23249, P62334, P47857, Q9ESL4, Q64737, Q9CZ30, P97930, P51855, Q9EQP2, P62192, Q3THK7, Q64261, Q04447, Q6URW6, Q8BH69, Q9WUA3, P28867, P43247, Q8CIN4</p>                                                                                                                                                                                                                                                                                                                                                                                                                                                                                                                                                                                                                                                                                                                                                                                                                                                                                                                                                                                                                                                                                                                                                                                                                                                                                        | 6.16765078166711E-05                                                                                                                                                                                                                                                                                                                                                                                                                                                                                                                                                                                                                                                                                                                                                                                                                                                                                                                                                                                                                                                                                                                                                                                                                                                                                                                                                                                |                      |
| <b>Annotation Cluster 3</b> Enrichment Score: 14.342782284986528 |                   |                  |                      |                                                                                                                                                                                                                                                                                                                                                                                                                                                                                                                                                                                                                                                                                                                                                                                                                                                                                                                                                                                                                                                                                                                                                                                                                                                                                                                                                                                                                                                                                                                                                                                                                                                                                                                                                                                                                                                                                                                                                                                                                                       |                                                                                                                                                                                                                                                                                                                                                                                                                                                                                                                                                                                                                                                                                                                                                                                                                                                                                                                                                                                                                                                                                                                                                                                                                                                                                                                                                                                                     |                      |
| Category                                                         | Term              | Count            | %                    | PValue                                                                                                                                                                                                                                                                                                                                                                                                                                                                                                                                                                                                                                                                                                                                                                                                                                                                                                                                                                                                                                                                                                                                                                                                                                                                                                                                                                                                                                                                                                                                                                                                                                                                                                                                                                                                                                                                                                                                                                                                                                | Genes                                                                                                                                                                                                                                                                                                                                                                                                                                                                                                                                                                                                                                                                                                                                                                                                                                                                                                                                                                                                                                                                                                                                                                                                                                                                                                                                                                                               | FDR                  |
| UP_KEYWORDS                                                      | Protein transport | 82               | 7.38738738738739     | 2.66653297424901E-22                                                                                                                                                                                                                                                                                                                                                                                                                                                                                                                                                                                                                                                                                                                                                                                                                                                                                                                                                                                                                                                                                                                                                                                                                                                                                                                                                                                                                                                                                                                                                                                                                                                                                                                                                                                                                                                                                                                                                                                                                  | <p>P98078, Q9D8U8, Q9DBH5, Q8BUK6, Q6P5F9, Q91YJ2, A2A5R2, O08547, P17427, P17426, Q8BKC5, Q6P8X1, Q91YE6, O35643, Q8CIE6, Q01405, O09044, P62075, Q64152, P22892, P46467, Q8R307, Q9CT10, Q9EPL8, P46460, Q8VDV3, Q9CR16, Q8BFY9, Q9CR95, Q8CI71, Q8V175, Q5DQR4, Q9CWK8, O54774, P61750, P57780, Q9QXK3, Q9D906, Q9Z1T1, Q920Q4, O70404, Q5XJY5, Q8R4R6, Q91W86, Q9ERK4, Q61655, Q9WU78, P61924, Q8C2E7, Q8BJ71, Q99MD9, P35279, P70168, Q9D662, Q8C0E2, P84091, Q64324, P42567, P62331, O35344, Q9D8B3, Q8BIJ7, Q8BPX9, P61967, Q9CWZ7, Q9EQH3, Q8R0H9, P26450, O35382, Q924C1, Q8BH60, Q9D2V7, Q3UM18, Q9QZ88, P35276, P84078, O88746, P60521, Q9CWU9, O89079, P40336, Q3UMB9</p> <p>P98078, Q9D8U8, Q9DBH5, Q8BUK6, Q6P5F9, Q91YJ2, A2A5R2, O08547, P17427, P17426, Q8BKC5, Q6P8X1, Q91YE6, O35643, Q8CIE6, Q01405, O09044, P62075, Q64152, P22892, O88531, P46467, Q8R307, Q9CT10, Q9EPL8, P46460, Q8VDV3, Q9CR16, Q8BFY9, Q9CR95, Q8CI71, Q8V175, Q5DQR4, Q9CWK8, O54774, P61750, P57780, Q9QXK3, Q9D906, Q9Z1T1, Q920Q4, O70404, Q5XJY5, Q91W86, P50396, Q9ERK4, Q61655, Q9WU78, P61924, Q8C2E7, Q8BJ71, Q99MD9, P35279, O35075, P70168, Q9D662, Q8C0E2, P84091, Q64324, P42567, P62331, Q8VDD5, O35344, Q9D8B3, Q8BIJ7, Q8BPX9, P61967, Q9CWZ7, Q9EQH3, Q8R0H9, P26450, O35382, Q924C1, Q8BH60, Q9D2V7, Q3UM18, Q9QZ88, P35276, P84078, O88746, P60521, Q9CWU9, O89079, P40336, Q3UMB9</p> | 1.03613852713676E-20 |
| GOTERM_BP_DIRECTGO:0015031~protein transport                     |                   | 85               | 7.65765765765766     | 9.2877597444201E-19                                                                                                                                                                                                                                                                                                                                                                                                                                                                                                                                                                                                                                                                                                                                                                                                                                                                                                                                                                                                                                                                                                                                                                                                                                                                                                                                                                                                                                                                                                                                                                                                                                                                                                                                                                                                                                                                                                                                                                                                                   | <p>P98078, Q9D8U8, Q9DBH5, Q8BUK6, Q6P5F9, Q91YJ2, A2A5R2, O08547, P17427, P17426, Q8BKC5, Q6P8X1, Q91YE6, O35643, Q8CIE6, Q01405, O09044, P62075, Q64152, P22892, O88531, P46467, Q8R307, Q9CT10, Q9EPL8, P46460, Q8VDV3, Q9CR16, Q8BFY9, Q9CR95, Q8CI71, Q8V175, Q5DQR4, Q9CWK8, O54774, P61750, P57780, Q9QXK3, Q9D906, Q9Z1T1, Q920Q4, O70404, Q5XJY5, Q91W86, P50396, Q9ERK4, Q61655, Q9WU78, P61924, Q8C2E7, Q8BJ71, Q99MD9, P35279, O35075, P70168, Q9D662, Q8C0E2, P84091, Q64324, P42567, P62331, Q8VDD5, O35344, Q9D8B3, Q8BIJ7, Q8BPX9, P61967, Q9CWZ7, Q9EQH3, Q8R0H9, P26450, O35382, Q924C1, Q8BH60, Q9D2V7, Q3UM18, Q9QZ88, P35276, P84078, O88746, P60521, Q9CWU9, O89079, P40336, Q3UMB9</p>                                                                                                                                                                                                                                                                                                                                                                                                                                                                                                                                                                                                                                                                                       | 1.38666252984192E-15 |

| Annotation Cluster | Enrichment Score: 13.097889438383417       | Category | Term | Count | %                | PValue               | Genes                                                                                                                                                                                                                                                                                                                                                                                                                                                                                                                                                                                                                                                                                                                                                                                                                                                                                                                                                                                                                                                                                                                                                                           | FDR                  |
|--------------------|--------------------------------------------|----------|------|-------|------------------|----------------------|---------------------------------------------------------------------------------------------------------------------------------------------------------------------------------------------------------------------------------------------------------------------------------------------------------------------------------------------------------------------------------------------------------------------------------------------------------------------------------------------------------------------------------------------------------------------------------------------------------------------------------------------------------------------------------------------------------------------------------------------------------------------------------------------------------------------------------------------------------------------------------------------------------------------------------------------------------------------------------------------------------------------------------------------------------------------------------------------------------------------------------------------------------------------------------|----------------------|
| GOTERM_BP_DIRECT   | GO:0006886~intracellular protein transport |          |      | 44    | 3.96396396396396 | 4.48607236197578E-14 | Q9ERK4, P61924, Q9D8U8, Q68FD5, P35279, O35075, P70168, Q6P5F9, Q8R5A6, P17427, Q8C0E2, Q9D662, P17426, P84091, Q8BKC5, Q6P8X1, Q9CXF4, Q91YE6, O35643, Q01405, Q8CIE6, P68510, P22892, Q8R307, P61967, P49615, Q9CWZ7, Q9EQH3, Q9EPL8, P46460, Q8R0H9, Q8BFY9, Q924C1, Q8V175, Q9QZ88, Q9CWXK8, O54774, O88746, Q9QXX3, O88447, Q9Z1T1, Q920Q4, P40336, Q91W86                                                                                                                                                                                                                                                                                                                                                                                                                                                                                                                                                                                                                                                                                                                                                                                                                 | 3.34885301821492E-11 |
| UP_KEYWORDS        | Transport                                  |          |      | 142   | 12.7927927927928 | 5.3819453027416E-12  | Q9CR68, Q8BL97, Q8BVE3, Q8BUC6, Q91YJ2, A2A5R2, O08547, Q61792, P51863, P17427, O08788, P17426, Q6P8X1, O35643, Q01405, P62075, Q64152, Q8R307, Q9CT10, Q9EPL8, Q8VDV3, Q62418, Q9ES97, Q9CR51, Q03265, Q8C171, P35922, P53811, Q8V175, Q9R0Q9, Q5DQR4, P62482, Q9QXX3, O88569, Q9D906, Q9Z1T1, Q9JHU4, O70404, Q5XJY5, Q8R4R6, Q8BTY2, Q61655, P56135, Q9CPQ8, Q8R2E9, P70168, Q8C0E2, P42567, P51807, Q8BIJ7, P56383, Q8BPX9, P62814, P61967, Q8R0H9, Q9D855, Q9CQZ6, O35382, Q8BH60, Q924C1, P31786, Q9QZ88, Q05816, O08583, P60521, Q9CWU9, O89079, Q9CQA1, P98078, P53564, Q9D8U8, Q9DBH5, Q6P5F9, Q8BKC5, Q62048, Q91YE6, Q8CIE6, Q8C0L0, O09044, P22892, Q9CQH3, P46467, Q8R1I1, Q8R1Q8, Q64518, Q9CPN8, P46460, Q9CR16, Q8BFY9, Q9CR95, Q8VDJ3, Q9CQX2, Q8R180, Q9Z1G3, Q9CQ75, Q9DBG5, Q9CWXK8, O54774, P61750, P57780, Q920Q4, Q91W86, Q9ERK4, P61924, Q9WU78, B2RXC1, Q8C2E7, Q8BJ71, P99028, Q99MD9, P35279, Q9QXX4, P50516, P31750, Q9D662, P84091, Q64324, P62331, O35344, Q5SF07, P50518, O54984, Q9D8B3, Q9WU81, Q9QYB1, Q8VBT6, Q6PB66, Q9CWZ7, Q9EQH3, P26450, Q8BMD8, Q61462, Q9D2V7, Q3UM18, Q91VD9, P84078, P35276, O88746, P62627, Q921H1, P40336, Q3UMB9 | 8.13271734636509E-11 |
| GOTERM_BP_DIRECT   | GO:0006810~transport                       |          |      | 142   | 12.7927927927928 | 3.23165573553106E-08 | Q9CR68, Q8BL97, Q8BVE3, Q8BUC6, Q91YJ2, A2A5R2, O08547, Q61792, P51863, P17427, O08788, P17426, Q6P8X1, O35643, Q01405, P62075, Q64152, Q8R307, Q9CT10, Q9EPL8, Q8VDV3, Q62418, Q9ES97, Q9CR51, Q03265, Q8C171, P35922, P53811, Q8V175, Q9R0Q9, Q5DQR4, P62482, Q9QXX3, O88569, Q9D906, Q9Z1T1, Q9JHU4, O70404, Q5XJY5, Q8BTY2, Q61655, P56135, Q9CPQ8, Q8R2E9, P70168, Q8C0E2, P42567, P51807, Q8BIJ7, P56383, Q8BPX9, P62814, P61967, Q8R0H9, Q9D855, Q9CQZ6, O35382, Q8BH60, Q924C1, P31786, Q9QZ88, Q05816, O08583, P60521, Q9CWU9, O89079, Q9CQA1, P98078, P53564, Q9D8U8, Q9DBH5, Q6P5F9, Q8BKC5, Q62048, Q91YE6, Q8CIE6, Q8C0L0, O09044, P22892, Q9CQH3, P46467, Q8R1I1, Q8R1Q8, Q64518, Q9CPN8, P46460, Q9CR16, Q8BFY9, Q9CR95, Q8VDJ3, Q9CQX2, Q8R180, Q9Z1G3, Q9CQ75, Q9DBG5, Q9CWXK8, O54774, P61750, P57780, Q920Q4, Q91W86, Q9ERK4, P61924, Q9WU78, B2RXC1, Q8C2E7, Q8BJ71, P99028, Q99MD9, P35279, Q9QXX4, P50516, P31750, Q9D662, P84091, Q64324, P62331, O35344, Q5SF07, P50518, O54984, Q9D8B3, Q9WU81, Q9QYB1, Q8VBT6, Q6PB66, Q9CWZ7, Q9EQH3, P26450, Q8BMD8, Q61462, Q9D2V7, Q3UM18, Q91VD9, P84078, P35276, O88746, P62627, Q921H1, P40336, Q3UMB9         | 6.43314935086384E-06 |
| UP_KEYWORDS        | Actin-binding                              |          |      | 44    | 3.96396396396396 | 2.37361711784978E-15 | O89053, Q7TPR4, Q9WV32, Q9ERG0, Q9QXZ0, P70460, Q3V0K9, Q61879, P26043, Q9Z0P5, Q62261, Q8BTM8, Q61792, P70248, P48193, P40124, P61161, Q9JHJ0, P21107, Q7TMB8, Q8VDD5, Q8R1S4, Q9CVB6, Q9JM76, P47753, P47754, Q8K298, Q99K51, Q8BH43, Q8VD75, O70200, Q62418, O08638, Q9WUM4, Q9D2V7, P59999, Q9QXS1, Q9JJ28, P57780, Q6URW6, Q6IRU2, Q9CQI6, O88342, P26645                                                                                                                                                                                                                                                                                                                                                                                                                                                                                                                                                                                                                                                                                                                                                                                                                  | 4.61159897182243E-14 |
| GOTERM_MF_DIRECT   | GO:0003779~actin binding                   |          |      | 55    | 4.95495495495496 | 6.58355266468474E-14 | Q9WV32, Q9QXZ0, P70460, Q61879, Q9Z0P5, Q8BTM8, Q71LX4, Q61792, P40124, Q9JHJ0, Q7TMB8, Q9CVB6, Q9JM76, P47753, P47754, P61982, Q8R307, Q99K51, Q8BH43, O70200, Q62418, O08638, P59999, Q9QXS1, P57780, Q6IRU2, Q920Q4, O89053, Q7TPR4, Q9ERG0, P26041, P26040, Q3V0K9, P26043, Q62261, P70248, P48193, P61161, P21107, Q8VDD5, Q8R1S4, P68510, Q8K298, P26039, Q8C151, Q8VD75, Q9WUM4, Q9D2V7, P97814, P70315, Q9JJ28, Q6URW6, Q9CQI6, O88342, P26645                                                                                                                                                                                                                                                                                                                                                                                                                                                                                                                                                                                                                                                                                                                          | 8.57507734575187E-12 |
| GOTERM_MF_DIRECT   | GO:0051015~actin filament binding          |          |      | 31    | 2.79279279279279 | 3.25432337394627E-12 | O89053, Q7TPR4, Q9WV32, Q9ERG0, P26040, Q3V0K9, Q61879, Q8BTM8, Q71LX4, Q61792, P61161, Q7TMB8, Q8VDD5, Q8R1S4, Q9CVB6, Q9JM76, P47753, Q8C052, P26039, Q99K51, Q8VD75, O70200, Q62418, O08539, Q9WUM4, P59999, Q3UQ44, P57780, Q6URW6, Q920Q4, O88342                                                                                                                                                                                                                                                                                                                                                                                                                                                                                                                                                                                                                                                                                                                                                                                                                                                                                                                          | 3.08273177786547E-10 |

| Annotation Cluster 5 |                                            | Enrichment Score: 10.49321123568879 |                   |                      |                                                                                                                                                                                                                                                                                                                                                                                                                                                                                                                                                                                                        |                      |  |
|----------------------|--------------------------------------------|-------------------------------------|-------------------|----------------------|--------------------------------------------------------------------------------------------------------------------------------------------------------------------------------------------------------------------------------------------------------------------------------------------------------------------------------------------------------------------------------------------------------------------------------------------------------------------------------------------------------------------------------------------------------------------------------------------------------|----------------------|--|
| Category             | Term                                       | Count                               | %                 | PValue               | Genes                                                                                                                                                                                                                                                                                                                                                                                                                                                                                                                                                                                                  | FDR                  |  |
| INTERPRO             | IPR016040:NAD(P)-binding domain            | 41                                  | 3.69369369369369  | 1.25435870506383E-15 | P50396, P23591, Q9R1T2, Q91YR9, P19096, Q9EQ06, Q9DBB8, Q9CY64, Q8VBW6, Q9DCD0, Q9CQ62, Q99L04, Q8BV14, Q8VE47, Q64105, Q62465, Q922D8, Q3ULJ0, Q8C0L6, Q8K0C9, Q00612, Q91V92, O88712, Q9Z1F9, Q8R127, Q8K2T1, Q91X52, P06801, A2BDX3, P28474, Q99KP3, Q99MZ7, P50247, Q02053, Q58NB6, Q2TPA8, Q9JHU9, P14152, Q68FL4, Q9Z2G9, Q9D906                                                                                                                                                                                                                                                                 | 2.2126887557326E-12  |  |
| UP_KEYWORDS          | Oxidoreductase                             | 66                                  | 5.94594594594595  | 2.47461187024199E-11 | P23591, Q9CR68, Q91YR9, P19096, Q9JMH6, Q99L04, Q8BV14, Q9JLJ2, Q64105, Q8JZN5, Q8C0L6, Q9D7B6, P45376, P61982, P45377, Q9EPL9, Q00519, O70325, Q6PDY2, Q8R180, Q99MZ7, Q2TPA8, P62482, Q61171, O88844, O09131, Q922Q1, O08807, P99029, Q9EQ06, Q9DBB8, Q9CY64, Q9DCD0, Q8R2E9, Q9CQ62, Q62465, Q922D8, Q3ULJ0, P47738, Q9JLT4, Q00612, O88712, Q8R127, P45952, P62259, Q91X52, P21300, P06801, Q9CQV8, Q8BSY0, P28474, P24270, P51174, P68254, Q9JH6, Q99KP3, Q9D051, Q61462, P11352, P35700, Q58NB6, Q91VD9, P14152, Q9Z2G9, G3X982, P24547                                                          | 3.54260225634642E-10 |  |
| UP_KEYWORDS          | NADP                                       | 31                                  | 2.79279279279279  | 3.58954501597315E-11 | P23591, Q91YR9, P19096, Q9EQ06, Q9DBB8, Q9CY64, Q9JMH6, Q9DCD0, Q9CQ62, Q8BV14, Q64105, Q922D8, Q8K0C9, Q9JLT4, Q00612, P45376, Q8K4Z3, P45377, Q8K2T1, P21300, Q91X52, P06801, P24270, Q9JH6, Q61462, Q99MZ7, Q58NB6, Q2TPA8, P62482, Q9Z2G9, O88844                                                                                                                                                                                                                                                                                                                                                  | 4.64931544926047E-10 |  |
| GOTERM_BP_DIRECT     | GO:0055114~oxidation-reduction process     | 73                                  | 6.57657657657658  | 5.73549770816044E-10 | P23591, Q9CR68, Q91YR9, P19096, Q9JMH6, Q99L04, Q8BV14, Q9JLJ2, Q64105, Q8JZN5, Q8C0L6, Q9D7B6, Q8C0L0, P45376, Q9CQH3, P45377, Q9EPL9, Q8R111, Q00519, O70325, Q6PDY2, Q9CQX2, Q8R180, Q99MZ7, Q9CQ75, Q2TPA8, P62482, Q61171, O88844, O09131, Q922Q1, P50396, O08807, P99029, Q9EQ06, P99028, Q9DBB8, Q9CY64, Q9DCD0, Q8R2E9, Q9CQ62, Q62465, Q922D8, Q3ULJ0, P47738, Q9JLT4, Q00612, O88712, Q8R127, P45952, Q91X52, P21300, P06801, Q8BSY0, P28474, P24270, O70145, Q9D855, P51174, A2AAAY5, Q9CQZ6, Q9JH6, Q99KP3, Q9D051, Q61462, P11352, P35700, Q58NB6, Q91VD9, P14152, Q9Z2G9, G3X982, P24547 | 1.71261961565671E-07 |  |
| GOTERM_MF_DIRECT     | GO:0016491~oxidoreductase activity         | 64                                  | 5.76576576576577  | 5.35062441540495E-08 | P23591, Q9CR68, Q91YR9, P19096, Q9JMH6, Q99L04, Q8BV14, Q9JLJ2, Q64105, Q8JZN5, Q8C0L6, Q9D7B6, P45376, P45377, Q9EPL9, Q00519, O70325, Q6PDY2, Q8R180, Q99MZ7, Q2TPA8, P62482, Q61171, O88844, O09131, Q922Q1, P50396, O08807, P99029, Q9EQ06, Q9DBB8, Q9CY64, Q9DCD0, Q8R2E9, Q9CQ62, Q62465, Q922D8, Q3ULJ0, P47738, Q9JLT4, Q00612, O88712, Q8R127, P45952, Q91X52, P21300, P06801, Q8BSY0, P28352, P28474, P24270, P51174, Q9JH6, Q99KP3, Q9D051, Q61462, P11352, P35700, Q58NB6, Q91VD9, P14152, Q9Z2G9, G3X982, P24547                                                                          | 3.71690042723464E-06 |  |
| Annotation Cluster 6 |                                            | Enrichment Score: 6.886068530340012 |                   |                      |                                                                                                                                                                                                                                                                                                                                                                                                                                                                                                                                                                                                        |                      |  |
| Category             | Term                                       | Count                               | %                 | PValue               | Genes                                                                                                                                                                                                                                                                                                                                                                                                                                                                                                                                                                                                  | FDR                  |  |
| KEGG_PATHWAY         | mmu04142:Lysosome                          | 31                                  | 2.79279279279279  | 3.5771768617316E-10  | P31996, Q9Z0J0, Q8BVE3, Q68FD5, O70370, P51569, P18242, P51863, Q571E4, O35643, Q9QWR8, P22892, O88531, P61967, O89023, O35604, P10605, P23780, Q9Z0M5, P11438, Q61207, Q8R0H9, Q8K2I4, P17439, Q9WUU7, P70699, P12265, P17047, O54774, O89017, Q9Z1T1                                                                                                                                                                                                                                                                                                                                                 | 2.77827402927821E-08 |  |
| UP_KEYWORDS          | Lysosome                                   | 31                                  | 2.79279279279279  | 1.7115707245255E-07  | P31996, Q9Z0J0, P28740, Q80TY0, O70370, P51569, P18242, Q571E4, Q9QWR8, Q8BPX9, O88531, Q8R307, O89023, O35604, P10605, P23780, Q9Z0M5, P11438, Q61207, Q8K2I4, P17439, Q9WUU7, P70699, P12265, P17047, Q8C1Y8, O89017, Q920Q4, Q3TCN2, O70404, Q91W86                                                                                                                                                                                                                                                                                                                                                 | 1.79056629642667E-06 |  |
| GOTERM_CC_DIRECT     | GO:0005764~lysosome                        | 34                                  | 3.06306306306306  | 3.58805545411426E-05 | P31996, Q9Z0J0, P28740, Q80TY0, O08529, O70370, P51569, P18242, Q571E4, Q9QWR8, Q8BPX9, O88531, Q8R307, O89023, O35604, P10605, P23780, Q9Z0M5, P11438, P24270, Q61207, Q8K2I4, P17439, Q9WUU7, P70699, P12265, P17047, Q8C1Y8, O89017, Q920Q4, Q3TCN2, O70404, P05201, Q91W86                                                                                                                                                                                                                                                                                                                         | 0.000481867142708    |  |
| Annotation Cluster 7 |                                            | Enrichment Score: 6.154872773091855 |                   |                      |                                                                                                                                                                                                                                                                                                                                                                                                                                                                                                                                                                                                        |                      |  |
| Category             | Term                                       | Count                               | %                 | PValue               | Genes                                                                                                                                                                                                                                                                                                                                                                                                                                                                                                                                                                                                  | FDR                  |  |
| GOTERM_CC_DIRECT     | GO:0005832~chaperonin-containing T-complex | 9                                   | 0.810810810810811 | 1.89254413585153E-10 | P80315, P80314, P80313, P42932, Q61390, P11983, P80318, P80317, P80316                                                                                                                                                                                                                                                                                                                                                                                                                                                                                                                                 | 6.32332393625689E-09 |  |

|                                                                 |                                                                                     |       |                   |                      |                                                                                                                                                                                                                                                                                                |                      |  |
|-----------------------------------------------------------------|-------------------------------------------------------------------------------------|-------|-------------------|----------------------|------------------------------------------------------------------------------------------------------------------------------------------------------------------------------------------------------------------------------------------------------------------------------------------------|----------------------|--|
| GOTERM_BP_DIRECT                                                | GO:1904874~positive regulation of telomerase RNA localization to Cajal body         | 11    | 0.990990990990991 | 1.96848045735179E-10 | P80315, P80314, P80313, P42932, P11983, Q9WTM5, Q9CRB2, P80318, P80317, P80316, Q9ESX5                                                                                                                                                                                                         | 6.53098071739161E-08 |  |
| INTERPRO                                                        | IPR027410:TCP-1-like chaperonin intermediate domain                                 | 9     | 0.810810810810811 | 7.09195088423539E-10 | P80315, P80314, P80313, P42932, Q61390, P11983, P80318, P80317, P80316                                                                                                                                                                                                                         | 2.50204027195825E-07 |  |
| INTERPRO                                                        | IPR002194:Chaperonin TCP-1, conserved site                                          | 9     | 0.810810810810811 | 7.09195088423539E-10 | P80315, P80314, P80313, P42932, Q61390, P11983, P80318, P80317, P80316                                                                                                                                                                                                                         | 2.50204027195825E-07 |  |
| INTERPRO                                                        | IPR017998:Chaperone tailless complex polypeptide 1 (TCP-1)                          | 9     | 0.810810810810811 | 2.49673198450877E-09 | P80315, P80314, P80313, P42932, Q61390, P11983, P80318, P80317, P80316                                                                                                                                                                                                                         | 7.34039203445579E-07 |  |
| GOTERM_BP_DIRECT                                                | GO:1904871~positive regulation of protein localization to Cajal body                | 8     | 0.720720720720721 | 5.36479421284757E-09 | P80315, P80314, P80313, P42932, P11983, P80318, P80317, P80316                                                                                                                                                                                                                                 | 1.45629777450571E-06 |  |
| GOTERM_BP_DIRECT                                                | GO:1904851~positive regulation of establishment of protein localization to telomere | 8     | 0.720720720720721 | 2.31068099135559E-08 | P80315, P80314, P80313, P42932, P11983, P80317, P80316, Q9ESX5                                                                                                                                                                                                                                 | 4.92835245727765E-06 |  |
| INTERPRO                                                        | IPR027409:GroEL-like apical domain                                                  | 9     | 0.810810810810811 | 4.02253819094346E-08 | P80315, P80314, P80313, P42932, Q61390, P11983, P80318, P80317, P80316                                                                                                                                                                                                                         | 8.02029383393424E-06 |  |
| INTERPRO                                                        | IPR027413:GroEL-like equatorial domain                                              | 9     | 0.810810810810811 | 4.02253819094346E-08 | P80315, P80314, P80313, P42932, Q61390, P11983, P80318, P80317, P80316                                                                                                                                                                                                                         | 8.02029383393424E-06 |  |
| GOTERM_BP_DIRECT                                                | GO:1901998~toxin transport                                                          | 13    | 1.171171171171171 | 5.69235066486781E-08 | P80315, P80314, P80313, P61924, P29452, Q8R0H9, P11983, P42932, Q61390, P80318, P80317, P80316, Q91W86                                                                                                                                                                                         | 1.06233494283095E-05 |  |
| INTERPRO                                                        | IPR002423:Chaperonin Cpn60/TCP-1                                                    | 9     | 0.810810810810811 | 8.27681832583954E-08 | P80315, P80314, P80313, P42932, Q61390, P11983, P80318, P80317, P80316, Q8BYA0, P11983, Q9CR00, P61222, P62075, Q64152, P80315, P80314, Q8BK64, Q9CQN1, P80313, P61759, Q9CR16, P35564, Q8BJY1, Q99M31, Q9CQP0, P42932, O08583, Q9CYG7, Q61390, Q9CQI6, Q9QY13, P80318, P80317, Q9Z2X2, P80316 | 1.09360549821977E-06 |  |
| UP_KEYWORDS                                                     | Chaperone                                                                           | 27    | 2.43243243243243  | 1.00515211233435E-07 | P80315, P80314, P80313, P42932, P11983, P80318, P80317, P80316                                                                                                                                                                                                                                 | 1.33292203543405E-05 |  |
| GOTERM_CC_DIRECT                                                | GO:0002199~zona pellucida receptor complex                                          | 8     | 0.720720720720721 | 6.33607305576047E-07 | P80315, P80314, P80313, P42932, P11983, P80318, P80317, P80316, P80315, P80314, P80313, P03995, P26040, P11983, P35922, O55131, P42932, P51807, Q9QVP9, Q8K4Z3, P20152, O09131, Q91V12, P80318, O89110, P80317, P80316                                                                         | 2.1255996952692E-05  |  |
| GOTERM_CC_DIRECT                                                | GO:0044297~cell body                                                                | 19    | 1.71171171171171  | 1.04783083569608E-06 | P80315, P80314, P80313, P42932, Q9JLV6, P63085, P11983, P80318, P80317, P80316, Q9ESX5                                                                                                                                                                                                         | 0.000292695709611    |  |
| GOTERM_BP_DIRECT                                                | GO:0032212~positive regulation of telomere maintenance via telomerase               | 11    | 0.990990990990991 | 1.96045351380464E-06 | P80315, P80314, P80313, P42932, Q9JLV6, P63085, P11983, P80318, P80317, P80316, Q9ESX5                                                                                                                                                                                                         | 0.000292695709611    |  |
| GOTERM_BP_DIRECT                                                | GO:0006457~protein folding                                                          | 21    | 1.89189189189189  | 4.57503101853134E-06 | P80315, P80314, P80313, P42932, Q9CR16, P11983, P35564, Q8R180, P42932, Q8C0L0, Q61390, P24369, P80318, Q8BGQ7, P80317, P80316, P05213                                                                                                                                                         | 0.000620956482788    |  |
| GOTERM_BP_DIRECT                                                | GO:0007339~binding of sperm to zona pellucida                                       | 9     | 0.810810810810811 | 0.000301830177014    | P80315, P80314, P80313, P42932, P11983, P80318, P80317, Q80X50, P80316                                                                                                                                                                                                                         | 0.022531622714125    |  |
| GOTERM_MF_DIRECT                                                | GO:0051082~unfolded protein binding                                                 | 12    | 1.08108108108108  | 0.001419652321844    | P80315, Q8BQM4, P80314, P80313, P42932, Q9CQN1, Q61390, P11983, P35564, P80318, P80317, P80316                                                                                                                                                                                                 | 0.035220898080037    |  |
| GOTERM_BP_DIRECT                                                | GO:0050821~protein stabilization                                                    | 16    | 1.44144144144144  | 0.00162735143942     | P80315, P80314, P80313, P11438, Q8VD75, P26450, Q8BTM8, P11983, Q91YE6, P17047, P42932, Q80UM3, P24369, P80318, P80317, P80316                                                                                                                                                                 | 0.075926115595452    |  |
| <b>Annotation Cluster 8</b> Enrichment Score: 5.928300490483733 |                                                                                     |       |                   |                      |                                                                                                                                                                                                                                                                                                |                      |  |
| Category                                                        | Term                                                                                | Count | %                 | PValue               | Genes                                                                                                                                                                                                                                                                                          | FDR                  |  |
| UP_KEYWORDS                                                     | Proteasome                                                                          | 23    | 2.07207207207207  | 1.58970186093811E-16 | Q9D8W5, P54775, Q3TXS7, P46471, Q9CX56, Q9JMA1, O35593, Q8VDM4, O08759, Q9WUP7, P62192, P54726, Q9CR00, P61290, Q99J14, Q6PD15, P62196, O88685, P26516, P62334, Q8R317, O35955, P97371                                                                                                         | 3.93089914704696E-15 |  |
| GOTERM_CC_DIRECT                                                | GO:0000502~proteasome complex                                                       | 25    | 2.25225225225225  | 8.70070365908302E-16 | Q9D8W5, P54775, P46471, O35593, Q8VDM4, Q9WUP7, Q9CR00, P61290, Q6PD15, P62196, P26516, P62334, P97371, Q3TXS7, Q9CX56, Q9JMA1, O08759, P62192, P54726, Q99J14, Q922Y1, O88685, Q8R317, O35955, Q9Z2X2                                                                                         | 4.94199967835915E-14 |  |
| GOTERM_CC_DIRECT                                                | GO:0022624~proteasome accessory complex                                             | 13    | 1.17117117117117  | 4.98679353820123E-13 | Q9D8W5, P54775, Q3TXS7, P46471, Q9CX56, O35593, Q8VDM4, P62192, Q8BJY1, Q99J14, P62196, O88685, P62334                                                                                                                                                                                         | 2.36041560808191E-11 |  |
| GOTERM_CC_DIRECT                                                | GO:0008540~proteasome regulatory particle, base subcomplex                          | 11    | 0.990990990990991 | 1.18101650454771E-11 | P54775, Q3TXS7, P46471, P62196, Q8VDM4, P62192, O88685, Q8BJY1, P62334, Q9CR00, Q9Z2X2                                                                                                                                                                                                         | 4.47211583055401E-10 |  |
| GOTERM_CC_DIRECT                                                | GO:0031597~cytosolic proteasome complex                                             | 9     | 0.810810810810811 | 9.07346072004997E-10 | P54775, Q9JHR7, P46471, P62196, O35593, Q9WUP7, P62192, O88685, P62334                                                                                                                                                                                                                         | 2.71248720473073E-08 |  |
| KEGG_PATHWAY                                                    | mmu03050:Proteasome                                                                 | 16    | 1.44144144144144  | 1.32348254017374E-07 | Q9D8W5, P54775, Q3TXS7, P46471, Q9CX56, O35593, Q8VDM4, P62192, P61290, Q99J14, P62196, O88685, P26516, P62334, O35955, P97371                                                                                                                                                                 | 5.13952386434136E-06 |  |
| GOTERM_CC_DIRECT                                                | GO:0031595~nuclear proteasome complex                                               | 7     | 0.630630630630631 | 2.63289947249576E-07 | Q9D8W5, P54775, P46471, P62196, P62192, O88685, P62334                                                                                                                                                                                                                                         | 5.98194760151037E-06 |  |
| INTERPRO                                                        | IPR005937:26S proteasome subunit P45                                                | 6     | 0.540540540540541 | 1.08508194662038E-06 | P54775, P46471, P62196, P62192, O88685, P62334                                                                                                                                                                                                                                                 | 0.000127605636923    |  |
| GOTERM_CC_DIRECT                                                | GO:0005838~proteasome regulatory particle                                           | 7     | 0.630630630630631 | 1.82104389017393E-06 | Q9D8W5, Q99J14, Q9CX56, P62196, Q8VDM4, P62192, P26516                                                                                                                                                                                                                                         | 3.336622353609E-05   |  |
| GOTERM_MF_DIRECT                                                | GO:0036402~proteasome-activating ATPase activity                                    | 6     | 0.540540540540541 | 1.97533771913985E-06 | P54775, P46471, P62196, P62192, O88685, P62334                                                                                                                                                                                                                                                 | 9.80143763497011E-05 |  |
| GOTERM_BP_DIRECT                                                | GO:0030163~protein catabolic process                                                | 11    | 0.990990990990991 | 8.02061042221958E-05 | P54775, Q9D4H8, P46471, P62196, Q9JKB1, Q9D906, P18242, P62192, O88685, P62334, P31750                                                                                                                                                                                                         | 0.008726371327283    |  |
| GOTERM_MF_DIRECT                                                | GO:0016887~ATPase activity                                                          | 25    | 2.25225225225225  | 8.90459204778717E-05 | P28740, P54276, Q9QXZ0, P56135, P46471, Q9CPQ8, Q62167, Q8VDD5, P61222, O54984, Q9JHR7, P62196, Q8R323, P46467, Q9JK91, P46460, Q9CZ30, Q9CR51, Q9WTM5, Q03265, Q99LE6, Q9JHU4, P43247, Q6P542, E9Q555                                                                                         | 0.003225965208734    |  |
| INTERPRO                                                        | IPR003960:ATPase, AAA-type, conserved site                                          | 8     | 0.720720720720721 | 0.000152249541173    | P54775, P46460, P46471, P62196, P62192, O88685, P46467, P62334                                                                                                                                                                                                                                 | 0.008952273020976    |  |

|                  |                                                                                   |    |                   |                   |                                                                                                                                                                                 |                   |
|------------------|-----------------------------------------------------------------------------------|----|-------------------|-------------------|---------------------------------------------------------------------------------------------------------------------------------------------------------------------------------|-------------------|
| GOTERM_BP_DIRECT | GO:0045899~positive regulation of RNA polymerase II transcriptional preinitiation | 6  | 0.540540540540541 | 0.000171994786234 | P54775, P46471, P62196, P62192, O88685, P62334                                                                                                                                  | 0.014266011991484 |
| KEGG_PATHWAY     | mmu05169:Epstein-Barr virus infection                                             | 20 | 1.8018018018018   | 0.002075155750007 | Q9D8W5, P54775, Q3TXXS7, P46471, Q9CX56, P26450, P24063, Q35593, Q8VDM4, P62192, P31750, Q04207, Q99J14, Q03963, P62196, P01900, O88685, P20152, P01897, P01896, P26516, P62334 | 0.023024347131025 |
| GOTERM_MF_DIRECT | GO:0017025~TBP-class protein binding                                              | 6  | 0.540540540540541 | 0.003525097357    | P54775, P46471, P62196, P62192, O88685, P62334                                                                                                                                  | 0.072022577372438 |
| SMART            | SM00382:AAA                                                                       | 15 | 1.35135135135135  | 0.004955447364589 | P54775, P46471, P46460, Q9WTM5, P62192, P61222, P62196, O88685, Q8R323, Q99LE6, P46467, Q9JHU4, P62334, Q6P542, E9Q555                                                          | 0.088888337102314 |

**Annotation Cluster 9** Enrichment Score: 5.862162759669797

| Category         | Term                                                                 | Count | %                 | PValue               | Genes                                                                                                                                                                                                                                  | FDR                  |
|------------------|----------------------------------------------------------------------|-------|-------------------|----------------------|----------------------------------------------------------------------------------------------------------------------------------------------------------------------------------------------------------------------------------------|----------------------|
| GOTERM_BP_DIRECT | GO:0006413~translational initiation                                  | 19    | 1.71171171171171  | 4.64328172582524E-11 | Q62448, Q99JX4, Q9Z0N1, Q99LC8, Q9DCH4, O70194, Q9Z1D1, Q6NZJ6, P59325, Q8R1B4, Q62167, Q8BGD9, P61222, Q61749, P23116, Q8QZY1, P60229, Q80XI3, Q6P542                                                                                 | 1.98069131904488E-08 |
| UP_KEYWORDS      | Initiation factor                                                    | 17    | 1.53153153153153  | 5.03071021986964E-09 | Q62448, Q99JX4, Q9Z0N1, Q99LC8, Q9DCH4, O70194, Q9Z1D1, Q6NZJ6, P59325, Q8R1B4, Q8BGD9, Q03963, Q61749, P23116, Q8QZY1, P60229, Q80XI3                                                                                                 | 5.9493616513241E-08  |
| GOTERM_CC_DIRECT | GO:0005852~eukaryotic translation initiation factor 3 complex        | 10    | 0.900900090090091 | 8.62920920391487E-09 | Q99JX4, P61222, Q9DCH4, O70194, P23116, Q9Z1D1, Q8QZY1, Q8R1B4, P60229, Q62167                                                                                                                                                         | 2.45069541391182E-07 |
| GOTERM_BP_DIRECT | GO:0001731~formation of translation preinitiation complex            | 11    | 0.990990990990991 | 1.36240673234538E-07 | Q99JX4, Q9Z0N1, Q9DCH4, O70194, P23116, Q9Z1D1, Q8QZY1, Q8R1B4, P59325, P60229, Q8BGD9                                                                                                                                                 | 2.39302735457842E-05 |
| GOTERM_MF_DIRECT | GO:0003743~translation initiation factor activity                    | 17    | 1.53153153153153  | 2.25447904681005E-07 | Q62448, Q99JX4, Q9Z0N1, Q99LC8, Q9DCH4, O70194, Q9Z1D1, Q6NZJ6, P59325, Q8R1B4, Q8BGD9, Q03963, Q61749, P23116, Q8QZY1, P60229, Q80XI3                                                                                                 | 1.3234809468025E-05  |
| GOTERM_BP_DIRECT | GO:0006446~regulation of translational initiation                    | 12    | 1.08108108108108  | 2.8505330772724E-07  | Q62448, Q99JX4, Q99LC8, Q9DCH4, O70194, P23116, Q9Z1D1, Q6NZJ6, Q8QZY1, Q8R1B4, P59325, P60229                                                                                                                                         | 4.72871764929744E-05 |
| SMART            | SM00088:PINT                                                         | 8     | 0.720720720720721 | 1.58249338600579E-06 | Q9D8W5, Q99J14, Q99JX4, O88544, P23116, P61202, Q8R1B4, P60229                                                                                                                                                                         | 0.000227087800892    |
| UP_SEQ_FEATURE   | domain:PCI                                                           | 9     | 0.810810810810811 | 2.11992723040014E-06 | Q9D8W5, Q8VVBV7, Q99J14, Q99JX4, O88544, P23116, P61202, Q8R1B4, P60229                                                                                                                                                                | 0.000863203839619    |
| GOTERM_CC_DIRECT | GO:0016282~eukaryotic 43S preinitiation complex                      | 8     | 0.720720720720721 | 2.18798111817962E-06 | Q99JX4, Q9DCH4, O70194, P23116, Q9Z1D1, Q8QZY1, Q8R1B4, P60229                                                                                                                                                                         | 3.76597962159401E-05 |
| GOTERM_CC_DIRECT | GO:0033290~eukaryotic 48S preinitiation complex                      | 8     | 0.720720720720721 | 2.18798111817962E-06 | Q99JX4, Q9DCH4, O70194, P23116, Q9Z1D1, Q8QZY1, Q8R1B4, P60229                                                                                                                                                                         | 3.76597962159401E-05 |
| INTERPRO         | IPR000717:Proteasome component (PCI) domain                          | 8     | 0.720720720720721 | 3.03676906612939E-06 | Q9D8W5, Q99J14, Q99JX4, O88544, P23116, P61202, Q8R1B4, P60229                                                                                                                                                                         | 0.000297603368481    |
| KEGG_PATHWAY     | mmu03013:RNA transport                                               | 29    | 2.61261261261261  | 9.89214346656791E-06 | Q62448, Q9Z0N1, Q8BJ71, O70194, Q9DCH4, Q8K1J6, Q9Z1D1, Q35691, P59325, P70168, Q6P5F9, Q80UU2, Q80Y81, Q9EPU0, Q7TMB8, Q80XI3, Q99LC8, Q6NZJ6, Q924C1, Q8R1B4, P35922, Q61584, Q8BGD9, O08583, Q61749, P23116, Q9CWU9, P60229, Q8R4R6 | 0.000209533584337    |
| GOTERM_CC_DIRECT | GO:0071541~eukaryotic translation initiation factor 3 complex, eIF3m | 5     | 0.450450450450451 | 0.000284157130072    | Q99JX4, Q9DCH4, O70194, P23116, Q8R1B4                                                                                                                                                                                                 | 0.0028316008751      |
| GOTERM_BP_DIRECT | GO:0075525~viral translational termination-reinitiation              | 4     | 0.36036036036036  | 0.001113761157637    | O70194, P23116, Q9Z1D1, Q8QZY1                                                                                                                                                                                                         | 0.056954799581534    |

**Annotation Cluster 10** Enrichment Score: 5.516385413965608

| Category         | Term                                                   | Count | %                | PValue               | Genes                                                                                                                                                                                                                                                                                                                                                          | FDR                  |
|------------------|--------------------------------------------------------|-------|------------------|----------------------|----------------------------------------------------------------------------------------------------------------------------------------------------------------------------------------------------------------------------------------------------------------------------------------------------------------------------------------------------------------|----------------------|
| UP_KEYWORDS      | Aminoacyl-tRNA synthetase                              | 19    | 1.71171171171171 | 1.73901419252907E-15 | P32921, Q9Z1Q9, Q91WQ3, Q8C0C7, Q922B2, Q9ER72, Q9D0R2, Q68FL6, Q8CGC7, Q9WUA2, Q8BML9, Q8BP47, Q9CZD3, Q3UQ84, Q8BMJ2, P26638, Q8BU30, Q8BGQ7, Q9D0I9                                                                                                                                                                                                         | 3.63855277206082E-14 |
| GOTERM_MF_DIRECT | GO:0004812~aminoacyl-tRNA ligase activity              | 18    | 1.62162162162162 | 1.66136066159981E-12 | P32921, Q9Z1Q9, Q91WQ3, Q8C0C7, Q922B2, Q9ER72, Q9D0R2, Q68FL6, Q8CGC7, Q9WUA2, Q8BP47, Q9CZD3, Q3UQ84, Q8BMJ2, P26638, Q8BU30, Q8BGQ7, Q9D0I9                                                                                                                                                                                                                 | 1.731137809387E-10   |
| GOTERM_BP_DIRECT | GO:0006418~tRNA aminoacylation for protein translation | 17    | 1.53153153153153 | 3.16171994008566E-12 | P32921, Q9Z1Q9, Q91WQ3, P31230, Q922B2, Q9ER72, Q9D0R2, Q68FL6, Q8CGC7, Q8BML9, Q8BP47, Q9CZD3, Q3UQ84, Q8BMJ2, P26638, Q8BU30, Q9D0I9                                                                                                                                                                                                                         | 1.88817914821916E-09 |
| UP_KEYWORDS      | Ligase                                                 | 44    | 3.96396396396396 | 3.02863383174092E-11 | P32921, Q61510, Q8VCW8, P97386, Q9R1T2, B2RQC6, Q8C0C7, Q922B2, A2AN08, Q5SURO, Q9DCL9, Q922D8, Q80V11, Q8CGC7, Q8BML9, Q9CZD3, Q8BMJ2, Q9Z1F9, Q9QUJ7, P26638, P46664, Q8BU30, Q9D7H3, P41216, Q9Z1Q9, Q91WQ3, Q64737, P51855, Q9ER72, Q3THK7, P70698, Q9D2R0, Q9D0R2, Q02053, Q68FL6, Q9WUA2, Q8BP47, Q9Z2I9, Q3UQ84, P22682, Q9QXG4, Q8BGQ7, Q9D0I9, E9Q555 | 4.11894201116765E-10 |

|                  |                                                                  |    |                   |                      |                                                                                                                                                                                                                                                                                                                                                                |                      |
|------------------|------------------------------------------------------------------|----|-------------------|----------------------|----------------------------------------------------------------------------------------------------------------------------------------------------------------------------------------------------------------------------------------------------------------------------------------------------------------------------------------------------------------|----------------------|
| GOTERM_MF_DIRECT | GO:0016874~ligase activity                                       | 44 | 3.96396396396396  | 2.2862434781617E-07  | P32921, Q61510, Q8VCW8, P97386, Q9R1T2, B2RQC6, Q8C0C7, Q922B2, A2AN08, Q5SURO, Q9DCL9, Q922D8, Q80V11, Q8CGC7, Q9CZD3, Q8BMJ2, Q9Z1F9, Q9QUJ7, P26638, P46664, Q8BU30, Q9D7H3, P41216, Q9Z1Q9, Q91WQ3, Q64737, P51855, O08759, Q9ER72, Q3THK7, P70698, Q9D2R0, Q9D0R2, Q02053, Q68FL6, Q9WUA2, Q8BP47, Q9Z219, Q3UQ84, P22682, Q9QXG4, Q8BGQ7, Q9D019, E9Q555 | 1.3234809468025E-05  |
| KEGG_PATHWAY     | mmu00970:Aminoacyl-tRNA biosynthesis                             | 19 | 1.71171171171171  | 2.36684164511744E-07 | P32921, Q9Z1Q9, Q91WQ3, Q8C0C7, Q922B2, Q9ER72, Q9D0R2, Q68FL6, Q8CGC7, Q9WUA2, Q8BML9, Q8BP47, Q9CZD3, Q3UQ84, Q8BMJ2, P26638, Q8BU30, Q8BGQ7, Q9D019                                                                                                                                                                                                         | 7.15715659737465E-06 |
| UP_SEQ_FEATURE   | short sequence motif:"HIGH" region                               | 9  | 0.810810810810811 | 7.47593021619084E-07 | P32921, Q68FL6, Q9Z1Q9, Q8CGC7, Q91WQ3, Q8BMJ2, Q8BU30, Q9ER72, Q9D019                                                                                                                                                                                                                                                                                         | 0.000421642464193    |
| INTERPRO         | IPR001412:Aminoacyl-tRNA synthetase, class I, conserved site     | 8  | 0.720720720720721 | 1.7777251287985E-06  | P32921, Q68FL6, Q9Z1Q9, Q8CGC7, Q8BML9, Q8BMJ2, Q8BU30, Q9D019                                                                                                                                                                                                                                                                                                 | 0.00019599419545     |
| INTERPRO         | IPR014729:Rossmann-like alpha/beta/alpha sandwich fold           | 12 | 1.08108108108108  | 2.98580226292338E-06 | P32921, Q68FL6, Q9Z1Q9, Q8CGC7, Q8BML9, Q91WQ3, Q8BMJ2, Q9DBL7, Q8BU30, Q3THK7, Q9ER72, Q9D019                                                                                                                                                                                                                                                                 | 0.000297603368481    |
| UP_SEQ_FEATURE   | short sequence motif:"KMSKS" region                              | 8  | 0.720720720720721 | 4.09207350095125E-06 | P32921, Q68FL6, Q9Z1Q9, Q8CGC7, Q91WQ3, Q8BMJ2, Q8BU30, Q9ER72                                                                                                                                                                                                                                                                                                 | 0.001153964727268    |
| INTERPRO         | IPR009080:Aminoacyl-tRNA synthetase, class 1a, anticodon-binding | 6  | 0.540540540540541 | 0.00017829883479     | Q68FL6, Q9Z1Q9, Q8BMJ2, Q8BU30, Q9ER72, Q9D019                                                                                                                                                                                                                                                                                                                 | 0.010145778857104    |
| SMART            | SM00991:SM00991                                                  | 4  | 0.36036036036036  | 0.001594134357824    | P32921, Q68FL6, Q8CGC7, Q9CZD3                                                                                                                                                                                                                                                                                                                                 | 0.041592414608683    |
| INTERPRO         | IPR000738:WHEP-TRS                                               | 4  | 0.36036036036036  | 0.001667151763658    | P32921, Q68FL6, Q8CGC7, Q9CZD3                                                                                                                                                                                                                                                                                                                                 | 0.061267827314441    |
| INTERPRO         | IPR009068:S15/NS1, RNA-binding                                   | 4  | 0.36036036036036  | 0.002819479396033    | P32921, Q68FL6, Q8CGC7, Q9CZD3                                                                                                                                                                                                                                                                                                                                 | 0.088813600975053    |

**Annotation Cluster 11** Enrichment Score: 5.4399320655692565

| Category    | Term            | Count | %                | PValue               | Genes                                                                                                                                                                                                                                                                                                                                                                                                                                                                                                                                                                                                                                                                                                                                                                                                                                                                                                                                                                                                                                                                                  | FDR                  |
|-------------|-----------------|-------|------------------|----------------------|----------------------------------------------------------------------------------------------------------------------------------------------------------------------------------------------------------------------------------------------------------------------------------------------------------------------------------------------------------------------------------------------------------------------------------------------------------------------------------------------------------------------------------------------------------------------------------------------------------------------------------------------------------------------------------------------------------------------------------------------------------------------------------------------------------------------------------------------------------------------------------------------------------------------------------------------------------------------------------------------------------------------------------------------------------------------------------------|----------------------|
| UP_KEYWORDS | Mitochondrion   | 87    | 7.83783783783784 | 1.7054420395373E-09  | Q9CR68, Q8BFR5, Q9CXW2, Q99KB8, Q9DCB8, Q8BK72, Q9WTP7, Q8K1J6, Q9ER88, Q9DBL7, Q80Y81, Q62167, P11440, Q8JZN5, Q9D7B6, Q8BMP6, P61222, Q9CRB9, P62075, Q3TIU4, Q8BGH2, Q9CQH3, P05132, P41216, Q8R1I1, Q9CR59, O70325, Q9CPV4, Q03265, Q9JIK9, Q8CG72, Q9CQX2, Q8BMF4, Q02053, Q9CQ75, Q07813, Q9Z219, Q9CYG7, Q3UQ84, Q922Q1, Q8BP40, Q8VCW8, Q8K411, Q8BKZ9, Q8BG51, P56135, P99029, Q9D0G0, P99028, Q9CPQ8, Q9CQ62, Q9QXX4, Q9CPQ1, Q62465, P47738, Q9JLT4, Q9CZD3, Q9QYR9, Q9QUJ7, Q9EPB4, Q8K4Z3, P56383, Q924T2, Q9JIM9, P45952, Q8R404, Q9QYB1, P62908, Q6PB66, Q9CQN1, Q9CQR4, P28352, Q9D855, Q9D338, P51174, Q14C51, Q9CQZ6, Q91VM9, Q8BMD8, Q9D172, Q9D051, P39749, O35459, Q91VD9, Q9DC61, Q9JK81, Q9JIY5, Q8K411, Q8VCW8, Q9CR68, Q8BFR5, Q8BKZ9, Q9DCB8, P99029, Q99KB8, P99028, Q9CQ62, Q9ER88, Q8K1J6, Q80Y81, Q8JZN5, P47738, Q9D7B6, Q9JLT4, Q9QYR9, Q3TIU4, Q8K4Z3, P56383, Q9CQH3, P45952, Q6PB66, O70325, Q9CQN1, Q9D338, P51174, Q14C51, Q03265, Q91VM9, Q9D172, Q9D051, Q8CG72, Q8BMF4, O35459, Q91VD9, Q9Z219, Q3UQ84, Q9DC61, Q922Q1, Q9JK81, Q9JIY5, Q8BP40 | 2.10854652160976E-08 |
| UP_KEYWORDS | Transit peptide | 44    | 3.96396396396396 | 8.97848803963553E-06 | Q922Q1, Q9JK81, Q9JIY5, Q8BP40                                                                                                                                                                                                                                                                                                                                                                                                                                                                                                                                                                                                                                                                                                                                                                                                                                                                                                                                                                                                                                                         | 6.97756784794533E-05 |

**Annotation Cluster 12** Enrichment Score: 4.591898595765302

| Category         | Term                      | Count | %                | PValue               | Genes                                                                                                                                                                                                                                                                                                                                                                                                                                                                                                                                          | FDR               |
|------------------|---------------------------|-------|------------------|----------------------|------------------------------------------------------------------------------------------------------------------------------------------------------------------------------------------------------------------------------------------------------------------------------------------------------------------------------------------------------------------------------------------------------------------------------------------------------------------------------------------------------------------------------------------------|-------------------|
| UP_KEYWORDS      | Endosome                  | 39    | 3.51351351351351 | 2.04434432678435E-05 | P31996, Q8C2E7, Q9D8U8, Q6R5N8, P97369, Q91YJ2, A2A5R2, Q8C0E2, Q6PAR5, Q80U87, P42567, Q6P8X1, P62331, Q80TM9, Q6PDI5, Q9D8B3, Q8BIJ7, P46467, Q8R307, O35604, Q9EQH3, P11438, O08917, Q8R0H9, P10107, Q62418, Q8CI71, Q9EQP2, Q9DBG5, Q9QZ88, P17047, Q9CWK8, Q920Q4, O70404, P40336, Q8BL66, Q810B6, Q3UMB9, Q91W86, Q89053, Q8C2E7, P51863, Q8C0E2, Q80U87, P42567, P62331, Q80TM9, Q6PDI5, P63085, Q8R307, P07356, Q0P5W1, Q8BH43, Q9EQH3, O08917, Q62418, P35821, O88746, Q920Q4, Q921H1, O70404, P40336, Q8BL66, Q810B6, Q3UMB9, Q91W86 | 0.000129316664392 |
| GOTERM_CC_DIRECT | GO:0005769~early endosome | 27    | 2.43243243243243 | 2.13984843585888E-05 | P31996, Q8C2E7, Q9D8U8, P26040, Q6R5N8, P97369, O35075, Q91YJ2, A2A5R2, Q8C0E2, Q6PAR5, Q80U87, P42567, Q6P8X1, P62331, Q80TM9, Q6PDI5, P50518, Q9CVB6, Q9D8B3, Q8BIJ7, P46467, Q8R307, P07356, O35604, Q9EQH3, P11438, O08917, Q8R0H9, P10107, Q62418, Q8CI71, O35382, Q9EQP2, Q61462, Q9DBG5, Q9QZ88, P17047, Q9CWK8, O88746, Q920Q4, Q921H1, O70404, P40336, Q8BL66, Q810B6, Q3UMB9, Q91W86                                                                                                                                                 | 0.000296447295504 |
| GOTERM_CC_DIRECT | GO:0005768~endosome       | 48    | 4.32432432432432 | 3.83148521192644E-05 | P31996, Q8C2E7, Q9D8U8, P26040, Q6R5N8, P97369, O35075, Q91YJ2, A2A5R2, Q8C0E2, Q6PAR5, Q80U87, P42567, Q6P8X1, P62331, Q80TM9, Q6PDI5, P50518, Q9CVB6, Q9D8B3, Q8BIJ7, P46467, Q8R307, P07356, O35604, Q9EQH3, P11438, O08917, Q8R0H9, P10107, Q62418, Q8CI71, O35382, Q9EQP2, Q61462, Q9DBG5, Q9QZ88, P17047, Q9CWK8, O88746, Q920Q4, Q921H1, O70404, P40336, Q8BL66, Q810B6, Q3UMB9, Q91W86                                                                                                                                                 | 0.000494609909176 |

**Annotation Cluster 13** Enrichment Score: 4.5379866480997535

| Category | Term | Count | % | PValue | Genes | FDR |
|----------|------|-------|---|--------|-------|-----|
|----------|------|-------|---|--------|-------|-----|



|                  |                                                   |   |                   |                      |                                                                        |                      |
|------------------|---------------------------------------------------|---|-------------------|----------------------|------------------------------------------------------------------------|----------------------|
| UP_KEYWORDS      | Purine biosynthesis                               | 9 | 0.810810810811    | 9.04194337092221E-09 | Q9CWJ9, Q64737, P24547, P46664, Q3THK7, Q5SUR0, P54822, Q922D8, Q9DCL9 | 1.02475358203785E-07 |
| GOTERM_BP_DIRECT | GO:0006164~purine nucleotide biosynthetic process | 9 | 0.810810810811    | 2.54041640730269E-06 | Q9CWJ9, Q64737, P24547, P46664, Q3THK7, Q5SUR0, P54822, Q922D8, Q9DCL9 | 0.000361223018676    |
| GOTERM_BP_DIRECT | GO:0006189~de novo IMP biosynthetic process       | 5 | 0.450450450450451 | 8.18279963710402E-05 | Q9CWJ9, Q64737, Q5SUR0, P54822, Q9DCL9                                 | 0.008726371327283    |
| KEGG_PATHWAY     | mmu00670:One carbon pool by folate                | 3 | 0.27027027027027  | 0.374959877517886    | Q9CWJ9, Q64737, Q922D8                                                 | 0.873851301163352    |

**Annotation Cluster 14** Enrichment Score: 4.4212248408739425

| Category         | Term                                      | Count | %                 | PValue               | Genes                                                                                  | FDR                  |
|------------------|-------------------------------------------|-------|-------------------|----------------------|----------------------------------------------------------------------------------------|----------------------|
| GOTERM_MF_DIRECT | GO:0004177~aminopeptidase activity        | 11    | 0.990990990990991 | 6.49437965581029E-07 | Q64514, Q99KK7, Q11136, Q6P1B1, P24527, Q8BP48, Q6NSR8, Q8R016, P97449, Q9Z2W0, Q11011 | 3.38357180067716E-05 |
| UP_KEYWORDS      | Aminopeptidase                            | 8     | 0.720720720720721 | 3.82651438477593E-05 | Q64514, Q99KK7, Q6P1B1, Q8BP48, Q6NSR8, P97449, Q9Z2W0, Q11011                         | 0.000216835815137    |
| GOTERM_MF_DIRECT | GO:0070006~metalloaminopeptidase activity | 6     | 0.540540540540541 | 0.002192726441027    | Q6P1B1, P24527, Q8BP48, P97449, Q9Z2W0, Q11011                                         | 0.048613211735107    |

**Annotation Cluster 15** Enrichment Score: 4.3335477887930995

| Category         | Term                                        | Count | %                | PValue               | Genes                                                                                                                                                                                                                                                                                                                                                                                                          | FDR                  |
|------------------|---------------------------------------------|-------|------------------|----------------------|----------------------------------------------------------------------------------------------------------------------------------------------------------------------------------------------------------------------------------------------------------------------------------------------------------------------------------------------------------------------------------------------------------------|----------------------|
| UP_KEYWORDS      | Protease                                    | 47    | 4.23423423423423 | 3.75811255452679E-06 | Q8K411, Q11136, Q6P1B1, P29452, P56399, Q9JKB1, Q8K2H2, O35593, Q9DCH4, P34960, O08529, O70370, Q9WUP7, P18242, P97449, Q8C0M9, Q99K23, P61290, Q80U87, Q9QUR6, Q9JHR7, P62196, Q8CDG3, Q9Z2W0, Q89001, O89023, Q64514, P10605, Q9JMA1, Q6NSR8, Q80W54, Q920A5, P35123, Q9WUU7, P70677, P46737, Q99KK7, P24527, Q8BP48, O89017, Q9DC61, Q8R016, Q9JIY5, Q9D1A2, Q11011, O89110, O35955                         | 3.29744069300415E-05 |
| UP_KEYWORDS      | Thiol protease                              | 19    | 1.71171171171171 | 1.09437261345234E-05 | P10605, P29452, Q9JMA1, P56399, Q9JKB1, Q9DCH4, Q8K2H2, O08529, O70370, Q9WUP7, P35123, Q9WUU7, P70677, Q99K23, Q80U87, O89017, Q8CDG3, Q8R016, O89110                                                                                                                                                                                                                                                         | 8.26859307941771E-05 |
| GOTERM_MF_DIRECT | GO:0008233~peptidase activity               | 48    | 4.32432432432432 | 8.97821411259852E-05 | Q8K411, Q11136, Q6P1B1, P29452, P56399, Q9JKB1, Q8K2H2, O35593, Q9DCH4, P34960, O08529, O70370, Q9WUP7, P18242, P97449, Q8C0M9, Q99K23, P61290, Q80U87, Q9QUR6, Q9JHR7, P62196, Q8CDG3, Q9Z2W0, O89001, O89023, Q64514, P10605, P57716, Q9JMA1, Q6NSR8, Q80W54, Q920A5, P35123, Q9WUU7, P70677, P46737, Q99KK7, P24527, Q8BP48, O89017, Q9DC61, Q8R016, Q9JIY5, Q9D1A2, Q11011, O89110, O35955                 | 0.003225965208734    |
| GOTERM_BP_DIRECT | GO:0006508~proteolysis                      | 50    | 4.50450450450451 | 0.00019036618432     | Q11136, Q6P1B1, P29452, P56399, Q8K2H2, P34960, O70370, P18242, Q99K23, Q80U87, Q9JHR7, O88456, Q8CDG3, O89023, Q64514, P10605, Q9CX56, Q920A5, P35123, P46737, P24527, Q8BP48, O89017, Q8R016, Q9D1A2, O35955, Q8K411, Q99JW2, Q9JKB1, O35593, Q9DCH4, O08529, Q9WUP7, P97449, Q8C0M9, Q9QUR6, Q9Z2W0, O89001, Q9JMA1, Q6NSR8, Q80W54, Q9WUU7, P70677, Q99KK7, Q9DC61, P22682, Q9JIY5, Q11011, O89110, Q6P069 | 0.015363065577851    |
| GOTERM_MF_DIRECT | GO:0008234~cysteine-type peptidase activity | 19    | 1.71171171171171 | 0.000305735798736    | P10605, P29452, Q9JMA1, P56399, Q9JKB1, Q9DCH4, Q8K2H2, O08529, O70370, Q9WUP7, P35123, Q9WUU7, P70677, Q99K23, Q80U87, O89017, Q8CDG3, Q8R016, O89110                                                                                                                                                                                                                                                         | 0.009653839463129    |

**Annotation Cluster 16** Enrichment Score: 4.312562776801149

| Category         | Term                                  | Count | %                | PValue               | Genes                                                                                                                                                                                                                                                                                                  | FDR                  |
|------------------|---------------------------------------|-------|------------------|----------------------|--------------------------------------------------------------------------------------------------------------------------------------------------------------------------------------------------------------------------------------------------------------------------------------------------------|----------------------|
| GOTERM_BP_DIRECT | GO:0016192~vesicle-mediated transport | 37    | 3.33333333333333 | 8.36532246930984E-11 | B2RXC1, P61924, Q80TY0, Q68FD5, P35279, A2A5R2, O08547, P17427, Q9D662, P17426, P84091, Q64324, P62331, O35643, Q01405, Q8CIE6, Q09044, P22892, Q8R307, P61967, Q9CWZ7, P46460, Q8R0H9, Q9ES97, Q5DQR4, Q58A65, O54774, P84078, P61750, Q9QXK3, Q8C1Y8, Q9Z1T1, O89079, O70404, Q9CQA1, Q5XJY5, Q91W86 | 3.1223566116699E-08  |
| UP_KEYWORDS      | ER-Golgi transport                    | 16    | 1.44144144144144 | 3.06326973872796E-06 | Q9CWZ7, B2RXC1, P61924, Q9ES97, P35279, O08547, Q9D662, P62331, Q01405, Q8CIE6, P84078, P61750, Q9QXK3, O89079, Q9CQA1, Q5XJY5                                                                                                                                                                         | 2.87313575494485E-05 |

**Annotation Cluster 17** Enrichment Score: 4.142697057063472

| Category | Term | Count | % | PValue | Genes | FDR |
|----------|------|-------|---|--------|-------|-----|
|----------|------|-------|---|--------|-------|-----|

|                  |                          |    |                  |                      |                                                                                                                                                                                                                                                                                                                                                                                                                                                        |                      |
|------------------|--------------------------|----|------------------|----------------------|--------------------------------------------------------------------------------------------------------------------------------------------------------------------------------------------------------------------------------------------------------------------------------------------------------------------------------------------------------------------------------------------------------------------------------------------------------|----------------------|
| UP_KEYWORDS      | Cell cycle               | 55 | 4.95495495495496 | 3.22710574271764E-07 | Q64701, Q8CG48, Q8K1R7, P97386, Q8VBW6, A2A432, Q9Z0H3, P11440, Q80U87, O55131, Q9Z0Y1, P63085, Q1HFZ0, Q60749, P46467, Q8R1Q8, P49615, Q9CR59, P97310, P97311, Q9D2X5, P18654, Q8VE37, P46737, Q9JLQ0, Q9WVA3, Q6P9P6, Q9WU78, P28740, Q8BFT2, Q8R3C0, Q9R1T4, Q99MD9, Q80X41, Q68FD5, P61290, P62331, A2AGT5, P49718, P51807, Q8K2Z4, P42208, Q8K298, P62137, Q8CFI2, Q80UG5, Q9JK91, P62908, P27661, Q9ESL4, Q64261, Q9CWU9, P28867, P43247, E9PVX6 | 3.25101022970073E-06 |
| UP_KEYWORDS      | Cell division            | 35 | 3.15315315315315 | 1.50374181937327E-05 | Q8CG48, Q6P9P6, Q8K1R7, Q9WU78, P97386, P28740, Q8BFT2, Q9R1T4, Q8R3C0, Q80X41, Q68FD5, P11440, P62331, P49718, O55131, A2AGT5, Q9Z0Y1, P51807, Q8K2Z4, Q1HFZ0, P46467, P42208, Q8K298, P62137, Q8R1Q8, P49615, Q80UG5, P62908, Q9D2X5, Q8VE37, P46737, Q9JLQ0, Q64261, Q9CWU9, Q9WVA3                                                                                                                                                                 | 0.000102254443717    |
| GOTERM_BP_DIRECT | GO:0007049~cell cycle    | 53 | 4.77477477477478 | 0.000105714741287    | Q64701, Q8CG48, Q8K1R7, P97386, Q8VBW6, A2A432, Q9Z0H3, P11440, Q80U87, O55131, Q9Z0Y1, P63085, Q1HFZ0, Q60749, P46467, Q8R1Q8, P49615, Q9CR59, P97310, P97311, Q9D2X5, P18654, Q8VE37, P46737, Q9JLQ0, Q9WVA3, Q6P9P6, Q9WU78, P28740, Q8BFT2, Q8R3C0, Q9R1T4, Q99MD9, Q80X41, P61290, P62331, A2AGT5, P49718, Q8K2Z4, P42208, Q8K298, P62137, Q8CFI2, Q80UG5, Q9JK91, P62908, P27661, Q9ESL4, Q64261, Q9CWU9, P28867, P43247, E9PVX6                 | 0.010522140582803    |
| UP_KEYWORDS      | Mitosis                  | 25 | 2.25225225225225 | 0.000211061239273    | Q8CG48, Q6P9P6, Q8K1R7, P28740, Q8BFT2, Q8R3C0, Q80X41, Q68FD5, P11440, O55131, A2AGT5, Q9Z0Y1, P51807, Q8K2Z4, Q1HFZ0, P42208, Q8K298, Q8R1Q8, P62908, Q9D2X5, Q8VE37, P46737, Q9JLQ0, Q9CWU9, Q9WVA3                                                                                                                                                                                                                                                 | 0.0010631232793      |
| GOTERM_BP_DIRECT | GO:0051301~cell division | 35 | 3.15315315315315 | 0.00046749781889     | Q8CG48, Q6P9P6, Q8K1R7, Q9WU78, P97386, P28740, Q8BFT2, Q9R1T4, Q8R3C0, Q80X41, P11440, P62331, P49718, O55131, A2AGT5, Q9Z0Y1, P51807, Q8K2Z4, Q1HFZ0, P46467, P42208, P27546, Q8K298, P62137, Q8R1Q8, P49615, Q80UG5, P62908, Q9D2X5, Q8VE37, P46737, Q9JLQ0, Q64261, Q9CWU9, Q9WVA3                                                                                                                                                                 | 0.030346706243628    |

**Annotation Cluster 18** Enrichment Score: 4.016622417706746

| Category         | Term                                 | Count | %                 | PValue               | Genes                                                                                                                  | FDR               |
|------------------|--------------------------------------|-------|-------------------|----------------------|------------------------------------------------------------------------------------------------------------------------|-------------------|
| UP_KEYWORDS      | Glucose metabolism                   | 8     | 0.720720720720721 | 2.02764448075805E-05 | Q7TSV4, Q00612, P31230, Q9D051, Q8BMF4, Q9D0F9, P31750, Q91X52                                                         | 0.000129316664392 |
| UP_KEYWORDS      | Carbohydrate metabolism              | 15    | 1.35135135135135  | 2.48817117597745E-05 | Q7TSV4, Q2NL51, P31230, Q9R0N0, Q9D051, Q8BMF4, P31750, Q88958, Q00612, Q8VHI3, Q8CHP8, Q9CYR6, Q9D0F9, P62137, Q91X52 | 0.000150396124415 |
| GOTERM_BP_DIRECT | GO:0006006~glucose metabolic process | 11    | 0.990990990990991 | 0.001767098191091    | Q05816, Q80TM9, Q7TSV4, Q00612, P26450, P31230, Q9D051, Q8BMF4, Q9D0F9, P31750, Q91X52                                 | 0.079947806039344 |

**Annotation Cluster 19** Enrichment Score: 3.9003086258494895

| Category         | Term                                                                           | Count | %                 | PValue               | Genes                                                                                          | FDR                  |
|------------------|--------------------------------------------------------------------------------|-------|-------------------|----------------------|------------------------------------------------------------------------------------------------|----------------------|
| GOTERM_CC_DIRECT | GO:0030117~membrane coat                                                       | 12    | 1.08108108108108  | 5.22452704307475E-08 | O35643, Q8CIE6, P61924, O54774, Q9QXK3, Q9D8B3, Q68FD5, Q9Z1T1, P22892, P61967, P17427, P17426 | 1.29023102628977E-06 |
| INTERPRO         | IPR002553:Clathrin/coatomer adaptor, adaptin-like, N-terminal                  | 7     | 0.630630630630631 | 1.85659747086415E-05 | O35643, O54774, Q9QXK3, Q9Z1T1, P22892, P17427, P17426                                         | 0.001364599141085    |
| INTERPRO         | IPR013041:Coatomer/clathrin adaptor appendage, Ig-like subdomain               | 6     | 0.540540540540541 | 0.000113965444189    | O35643, Q8R0H9, Q9QXK3, P22892, P17427, P17426                                                 | 0.007732117059583    |
| GOTERM_CC_DIRECT | GO:0030131~clathrin adaptor complex                                            | 7     | 0.630630630630631 | 0.000163702888487    | O35643, Q8R0H9, Q9Z1T1, P22892, P17427, P17426, P84091                                         | 0.001788139243478    |
| SMART            | SM00809:Alpha_adaptinC2                                                        | 5     | 0.450450450450451 | 0.000411624976949    | O35643, Q8R0H9, P22892, P17427, P17426                                                         | 0.016876624054891    |
| INTERPRO         | IPR008152:Clathrin adaptor, alpha/beta/gamma-adaptin, appendage, Ig-like subdo | 5     | 0.450450450450451 | 0.000437426883655    | O35643, Q8R0H9, P22892, P17427, P17426                                                         | 0.020946575222027    |
| INTERPRO         | IPR009028:Coatomer/calthrin adaptor appendage, C-terminal subdomain            | 4     | 0.36036036036036  | 0.001667151763658    | O35643, Q9QXK3, P17427, P17426                                                                 | 0.061267827314441    |

**Annotation Cluster 20** Enrichment Score: 3.8728156493750774

| Category         | Term                                                | Count | %                 | PValue               | Genes                                                  | FDR               |
|------------------|-----------------------------------------------------|-------|-------------------|----------------------|--------------------------------------------------------|-------------------|
| GOTERM_MF_DIRECT | GO:0008641~small protein activating enzyme activity | 7     | 0.630630630630631 | 3.07051586663889E-06 | Q9R1T2, A2BDX3, Q9Z1F9, Q8VBW6, Q9D906, Q8VE47, Q02053 | 0.000145430796956 |
| INTERPRO         | IPR000594:UBA/THIF-type NAD/FAD binding fold        | 7     | 0.630630630630631 | 3.21198601620739E-06 | Q9R1T2, A2BDX3, Q9Z1F9, Q8VBW6, Q9D906, Q8VE47, Q02053 | 0.000298207543821 |

**Annotation Cluster 21** Enrichment Score: 3.678891887676058

| Category    | Term                                     | Count | %                 | PValue               | Genes                                                  | FDR                  |
|-------------|------------------------------------------|-------|-------------------|----------------------|--------------------------------------------------------|----------------------|
| UP_KEYWORDS | Annexin                                  | 7     | 0.630630630630631 | 3.71904057239333E-06 | Q07076, P48036, P10107, P14824, P07356, O35639, P97429 | 3.29744069300415E-05 |
| SMART       | SM00335:ANX                              | 7     | 0.630630630630631 | 5.60249692754415E-06 | Q07076, P48036, P10107, P14824, P07356, O35639, P97429 | 0.000401979154551    |
| INTERPRO    | IPR001464:Annexin                        | 7     | 0.630630630630631 | 6.17731125444524E-06 | Q07076, P48036, P10107, P14824, P07356, O35639, P97429 | 0.000473772915341    |
| INTERPRO    | IPR018252:Annexin repeat, conserved site | 7     | 0.630630630630631 | 6.17731125444524E-06 | Q07076, P48036, P10107, P14824, P07356, O35639, P97429 | 0.000473772915341    |
| INTERPRO    | IPR018502:Annexin repeat                 | 7     | 0.630630630630631 | 6.17731125444524E-06 | Q07076, P48036, P10107, P14824, P07356, O35639, P97429 | 0.000473772915341    |

|                |                              |   |                   |                      |                                                        |                      |
|----------------|------------------------------|---|-------------------|----------------------|--------------------------------------------------------|----------------------|
| UP_KEYWORDS    | Calcium/phospholipid-binding | 7 | 0.630630630630631 | 6.66400442171409E-06 | Q07076, P48036, P10107, P14824, P07356, O35639, P97429 | 5.49275515971586E-05 |
| UP_SEQ_FEATURE | repeat:Annexin 1             | 7 | 0.630630630630631 | 3.77379786689777E-05 | Q07076, P48036, P10107, P14824, P07356, O35639, P97429 | 0.004683203784201    |
| UP_SEQ_FEATURE | repeat:Annexin 2             | 7 | 0.630630630630631 | 3.77379786689777E-05 | Q07076, P48036, P10107, P14824, P07356, O35639, P97429 | 0.004683203784201    |
| UP_SEQ_FEATURE | repeat:Annexin 3             | 7 | 0.630630630630631 | 3.77379786689777E-05 | Q07076, P48036, P10107, P14824, P07356, O35639, P97429 | 0.004683203784201    |
| UP_SEQ_FEATURE | repeat:Annexin 4             | 7 | 0.630630630630631 | 3.77379786689777E-05 | Q07076, P48036, P10107, P14824, P07356, O35639, P97429 | 0.004683203784201    |

**Annotation Cluster 22** Enrichment Score: 3.3251549543423433

| Category         | Term                                   | Count | %                 | PValue               | Genes                                                                                                                                  | FDR               |
|------------------|----------------------------------------|-------|-------------------|----------------------|----------------------------------------------------------------------------------------------------------------------------------------|-------------------|
| UP_KEYWORDS      | Endocytosis                            | 17    | 1.53153153153153  | 2.95666509726667E-05 | P98078, Q9D8U8, Q8VD75, Q80TY0, Q62418, Q9Z0R6, Q9CR95, O08539, P17427, P97814, P17426, P84091, Q6PAR5, P42567, Q8BIJ7, Q60902, Q810B6 | 0.000174828892708 |
| GOTERM_CC_DIRECT | GO:0005905~clathrin-coated pit         | 11    | 0.990990990990991 | 0.000422364254585    | P42567, P98078, Q80TY0, Q9CR95, Q60902, Q68FD5, P61967, Q92111, P17427, P17426, P84091                                                 | 0.004054201823124 |
| UP_KEYWORDS      | Coated pit                             | 9     | 0.810810810810811 | 0.000841767965852    | P42567, P98078, Q80TY0, Q60902, Q68FD5, P61967, P17427, P17426, P84091                                                                 | 0.003634299789073 |
| GOTERM_CC_DIRECT | GO:0030132~clathrin coat of coated pit | 4     | 0.36036036036036  | 0.004761003467172    | P42567, P98078, Q60902, Q68FD5                                                                                                         | 0.030730113288108 |

**Annotation Cluster 23** Enrichment Score: 3.180019520584447

| Category         | Term                                               | Count | %                 | PValue               | Genes                                                                                          | FDR                  |
|------------------|----------------------------------------------------|-------|-------------------|----------------------|------------------------------------------------------------------------------------------------|----------------------|
| INTERPRO         | IPR001494:Importin-beta, N-terminal                | 9     | 0.810810810810811 | 2.88314766872362E-07 | Q91YE6, Q9ERK4, Q9EPL8, Q8BFY9, Q924C1, P70168, Q6P5F9, Q8VI75, Q8BKC5                         | 3.91220960586805E-05 |
| SMART            | SM00913:SM00913                                    | 8     | 0.720720720720721 | 2.70559181227696E-06 | Q91YE6, Q9ERK4, Q9EPL8, Q8BFY9, Q924C1, P70168, Q6P5F9, Q8VI75                                 | 0.000258834950041    |
| GOTERM_MF_DIRECT | GO:0008536~Ran GTPase binding                      | 11    | 0.990990990990991 | 3.6275073811628E-06  | Q91YE6, Q9ERK4, Q9CT10, Q9EPL8, Q8BFY9, Q924C1, P70168, Q6P5F9, Q6VN19, Q8VI75, Q8BKC5         | 0.000164341856138    |
| UP_SEQ_FEATURE   | domain:Importin N-terminal                         | 8     | 0.720720720720721 | 4.09207350095125E-06 | Q91YE6, Q9ERK4, Q9EPL8, Q8BFY9, P70168, Q6P5F9, Q8VI75, Q8BKC5                                 | 0.001153964727268    |
| UP_SEQ_FEATURE   | repeat:HEAT 4                                      | 11    | 0.990990990990991 | 1.52735973100349E-05 | Q8BYA0, A2AGT5, Q6PDI5, Q9QXK3, Q8BFY9, P70168, Q6P5F9, Q8VI75, Q80X13, Q8BKC5, Q76MZ3         | 0.003445723553144    |
| UP_SEQ_FEATURE   | repeat:HEAT 5                                      | 10    | 0.900900900900901 | 1.71485308362884E-05 | A2AGT5, Q6PDI5, Q9QXK3, Q8BFY9, P70168, Q6P5F9, Q8VI75, Q80X13, Q8BKC5, Q76MZ3                 | 0.003517007778788    |
| UP_SEQ_FEATURE   | repeat:HEAT 1                                      | 12    | 1.08108108108108  | 2.95170168243794E-05 | Q8BYA0, Q8BQM4, A2AGT5, Q6PDI5, Q9QXK3, Q8BFY9, P70168, Q6P5F9, Q8VI75, Q80X13, Q8BKC5, Q76MZ3 | 0.004683203784201    |
| UP_SEQ_FEATURE   | repeat:HEAT 2                                      | 12    | 1.08108108108108  | 2.95170168243794E-05 | Q8BYA0, Q8BQM4, A2AGT5, Q6PDI5, Q9QXK3, Q8BFY9, P70168, Q6P5F9, Q8VI75, Q80X13, Q8BKC5, Q76MZ3 | 0.004683203784201    |
| UP_SEQ_FEATURE   | repeat:HEAT 3                                      | 11    | 0.990990990990991 | 3.9441875842119E-05  | Q8BYA0, A2AGT5, Q6PDI5, Q9QXK3, Q8BFY9, P70168, Q6P5F9, Q8VI75, Q80X13, Q8BKC5, Q76MZ3         | 0.004683203784201    |
| UP_SEQ_FEATURE   | repeat:HEAT 6                                      | 9     | 0.810810810810811 | 4.31373129474195E-05 | A2AGT5, Q6PDI5, Q9QXK3, Q8BFY9, P70168, Q6P5F9, Q8VI75, Q8BKC5, Q76MZ3                         | 0.00486588900469     |
| GOTERM_CC_DIRECT | GO:0034399~nuclear periphery                       | 7     | 0.630630630630631 | 0.000224664685043    | Q8BJ71, Q8BFY9, Q9D903, P70168, Q8VI75, Q99JF8, Q8BKC5                                         | 0.002320173474628    |
| GOTERM_BP_DIRECT | GO:0006610~ribosomal protein import into nucleus   | 5     | 0.450450450450451 | 0.000352530164211    | Q91YE6, Q8BFY9, P70168, Q8VI75, Q8BKC5                                                         | 0.025063215960323    |
| GOTERM_BP_DIRECT | GO:0006607~NLS-bearing protein import into nucleus | 6     | 0.540540540540541 | 0.001092932009275    | O35344, Q8BFY9, P70168, Q8VI75, Q8R4R6, Q8BKC5                                                 | 0.056954799581534    |
| UP_SEQ_FEATURE   | repeat:HEAT 8                                      | 6     | 0.540540540540541 | 0.001296409011383    | A2AGT5, Q6PDI5, Q8BFY9, P70168, Q6P5F9, Q76MZ3                                                 | 0.10832217517335     |
| COG_ONTOLOGY     | Intracellular trafficking and secretion            | 10    | 0.900900900900901 | 0.003512658354766    | Q01405, O35344, Q9QXK3, Q8BFY9, P70168, O08547, Q8VI75, Q9D662, Q8BKC5, Q64324                 | 0.054446204498873    |

**Annotation Cluster 24** Enrichment Score: 3.0654071850019777

| Category         | Term                          | Count | %                 | PValue            | Genes                                                                                                                                          | FDR               |
|------------------|-------------------------------|-------|-------------------|-------------------|------------------------------------------------------------------------------------------------------------------------------------------------|-------------------|
| GOTERM_MF_DIRECT | GO:0017124~SH3 domain binding | 18    | 1.62162162162162  | 0.000101612154788 | Q9WU78, P70460, Q3UIA2, Q61462, P11352, Q09014, P70315, Q9ESS2, Q80U87, P42567, Q9JUU8, Q9JLQ0, Q5FWK3, Q60749, Q8BPU7, P55194, P22682, O89112 | 0.003529328842986 |
| UP_KEYWORDS      | SH3-binding                   | 11    | 0.990990990990991 | 0.00016342993156  | P42567, P70460, Q9JUU8, Q9JLQ0, Q3UIA2, Q5FWK3, Q60749, P55194, Q8BPU7, Q9ESS2, Q80U87                                                         | 0.00085486425739  |

**Annotation Cluster 25** Enrichment Score: 2.9147257245086537

| Category | Term | Count | % | PValue | Genes | FDR |
|----------|------|-------|---|--------|-------|-----|
|----------|------|-------|---|--------|-------|-----|

|                                                                     |    |                  |                      |                                                                                                                                                                                                                                                                                                                                                                |                      |
|---------------------------------------------------------------------|----|------------------|----------------------|----------------------------------------------------------------------------------------------------------------------------------------------------------------------------------------------------------------------------------------------------------------------------------------------------------------------------------------------------------------|----------------------|
| GOTERM_CC_DIRECT:GO:0030529~intracellular ribonucleoprotein complex | 44 | 3.96396396396396 | 4.38966277175081E-10 | Q9CX86, Q9CXY6, P35979, Q9EQK5, P09405, Q9CXW2, Q91VR5, Q9JKB3, O70133, Q9D0G0, Q921F4, Q8BK72, P19253, Q9ER88, Q80WS3, Q9JKF1, Q6P5F9, Q8BMA6, Q8CGC7, P35980, P62317, Q924T2, Q9CRB2, Q9Z204, Q6PB66, P62908, Q9D338, Q91WM3, Q9WTM5, Q9JIK9, Q64012, P35922, Q9ESX5, P62320, O55142, P62960, P57780, Q9D8E6, O88569, P62305, Q9D8M4, P27659, P49962, P62843 | 1.38518247464137E-08 |
| UP_KEYWORDS Ribonucleoprotein                                       | 32 | 2.88288288288288 | 5.2965545031503E-06  | Q9CX86, P35979, Q9EQK5, Q9CXW2, Q9D0G0, Q921F4, Q8BK72, P19253, Q9ER88, Q80WS3, Q8BMA6, P35980, P62317, Q924T2, Q9CRB2, Q9Z204, P62908, Q9D338, Q91WM3, Q9JIK9, Q64012, P35922, Q9ESX5, P62320, O55142, Q9D8E6, O88569, P62305, Q9D8M4, P27659, P49962, P62843                                                                                                 | 4.50207132767775E-05 |
| GOTERM_CC_DIRECT:GO:0005840~ribosome                                | 19 | 1.71171171171171 | 0.003140471461229    | P62908, P35979, Q9CXW2, Q9D0G0, Q8BK72, Q9D338, P19253, Q9ER88, Q9JIK9, Q99M31, O55142, P35980, Q9D8E6, Q9D8M4, P27659, Q924T2, Q6P542, P62843                                                                                                                                                                                                                 | 0.02175350963387E    |
| UP_KEYWORDS Ribosomal protein                                       | 16 | 1.44144144144144 | 0.022266753550483    | P62908, P35979, Q9CXW2, Q9D0G0, Q8BK72, Q9D338, P19253, Q9ER88, Q9JIK9, O55142, P35980, Q9D8E6, Q9D8M4, P27659, Q924T2, P62843                                                                                                                                                                                                                                 | 0.060565569657314    |

**Annotation Cluster 26** Enrichment Score: 2.811732458952932

| Category        | Term                                                       | Count | %                 | PValue               | Genes                                                                                                                                  | FDR                  |
|-----------------|------------------------------------------------------------|-------|-------------------|----------------------|----------------------------------------------------------------------------------------------------------------------------------------|----------------------|
| INTERPRO        | IPR023409:14-3-3 protein, conserved site                   | 7     | 0.630630630630631 | 5.69361091595197E-08 | P63101, O70456, Q9CQV8, P68510, P68254, P61982, P62259                                                                                 | 1.00435296557393E-05 |
| SMART           | SM00101:14_3_3                                             | 7     | 0.630630630630631 | 1.97951139771116E-07 | P63101, O70456, Q9CQV8, P68510, P68254, P61982, P62259                                                                                 | 5.68119771143103E-05 |
| INTERPRO        | IPR000308:14-3-3 protein                                   | 7     | 0.630630630630631 | 2.1897133371542E-07  | P63101, O70456, Q9CQV8, P68510, P68254, P61982, P62259                                                                                 | 3.21887860561668E-05 |
| INTERPRO        | IPR023410:14-3-3 domain                                    | 7     | 0.630630630630631 | 6.31628805403384E-07 | P63101, O70456, Q9CQV8, P68510, P68254, P61982, P62259                                                                                 | 7.95852294808263E-05 |
| PIR_SUPERFAMILY | PIRSF000868:14-3-3 protein                                 | 7     | 0.630630630630631 | 3.8438086612351E-06  | P63101, O70456, Q9CQV8, P68510, P68254, P61982, P62259                                                                                 | 0.00056119606454     |
| UP_SEQ_FEATURE  | site:Interaction with phosphoserine on interacting protein | 7     | 0.630630630630631 | 6.63364189285118E-06 | P63101, O70456, Q9CQV8, P68510, P68254, P61982, P62259                                                                                 | 0.001662832901141    |
| KEGG_PATHWAY    | mmu04114:Oocyte meiosis                                    | 17    | 1.53153153153153  | 0.003626250559142    | Q9CQV8, Q9WTX6, P68254, P11440, P18654, P68181, Q76MZ3, P63101, P68510, P63085, P63328, O54988, P61982, P62715, P05132, P62137, P62259 | 0.036735494794787    |

**Annotation Cluster 27** Enrichment Score: 2.7837093563551996

| Category                                    | Term            | Count | %                | PValue               | Genes                                                                                                                                                                                                                                                                 | FDR                  |
|---------------------------------------------|-----------------|-------|------------------|----------------------|-----------------------------------------------------------------------------------------------------------------------------------------------------------------------------------------------------------------------------------------------------------------------|----------------------|
| UP_KEYWORDS                                 | mRNA processing | 31    | 2.79279279279279 | 1.32047694864338E-05 | Q8BL97, Q91VR5, O70551, Q6PFR5, Q99K48, O35691, Q62384, O35326, P51908, Q9DAR7, P83870, Q3TIU4, P62317, Q60749, Q569Z6, Q9Z204, Q8VE97, Q9JL8, Q61183, Q64012, P35922, P62320, P62960, P16110, O08583, O88569, Q922U1, P62305, Q9R1C7, Q9CWK3, Q9DAW6                 | 9.20948025720513E-05 |
| UP_KEYWORDS                                 | mRNA splicing   | 26    | 2.34234234234234 | 2.34043798287213E-05 | Q8BL97, O70551, Q6PFR5, Q99K48, O35691, Q62384, O35326, Q9DAR7, P83870, P62317, Q569Z6, Q9Z204, Q8VE97, Q9JL8, Q64012, P35922, P62320, P62960, P16110, O08583, O88569, Q922U1, P62305, Q9R1C7, Q9CWK3, Q9DAW6                                                         | 0.000144681620759    |
| GOTERM_BP_DIRECT:GO:0006397~mRNA processing |                 | 33    | 2.97297297297297 | 0.000139562024458    | Q8BL97, Q91VR5, O70551, Q921F4, Q6PFR5, Q99K48, O35691, Q62384, O35326, P51908, Q9DAR7, P83870, Q3TIU4, P62317, Q60749, P05132, Q569Z6, Q9Z204, Q8VE97, Q9JL8, Q61183, Q64012, P35922, P62320, P62960, P16110, O08583, O88569, Q922U1, P62305, Q9R1C7, Q9CWK3, Q9DAW6 | 0.01237807312573     |
| GOTERM_BP_DIRECT:GO:0008380~RNA splicing    |                 | 27    | 2.43243243243243 | 0.000157538507377    | Q8BL97, O70551, Q6PFR5, Q99K48, O35691, Q62384, O35326, Q9DAR7, P83870, P62317, Q569Z6, Q9Z204, Q8VE97, Q9JL8, Q64012, P35922, Q61464, P62320, P62960, P16110, O08583, O88569, Q922U1, P62305, Q9R1C7, Q9CWK3, Q9DAW6                                                 | 0.013440285229378    |
| UP_KEYWORDS                                 | Spliceosome     | 12    | 1.08108108108108 | 0.009354588216983    | Q9Z204, P62320, O08583, P16110, P83870, O88569, Q922U1, P62305, P62317, O35691, Q64012, Q9DAW6                                                                                                                                                                        | 0.030291047559753    |
| GOTERM_CC_DIRECT:GO:0016607~nuclear speck   |                 | 18    | 1.62162162162162 | 0.015923432909108    | Q8VE97, P28352, Q9JL8, Q99K48, O35691, Q7TQH0, Q62167, Q61464, O35326, O08583, P83870, Q922U1, Q9R1C7, Q9CY57, P05132, Q569Z6, Q9DAW6, Q9CWK3                                                                                                                         | 0.082476396081683    |

**Annotation Cluster 28** Enrichment Score: 2.7723771214648423

| Category                                                      | Term | Count | %                 | PValue               | Genes                                                                  | FDR                  |
|---------------------------------------------------------------|------|-------|-------------------|----------------------|------------------------------------------------------------------------|----------------------|
| GOTERM_CC_DIRECT:GO:0030904~retromer complex                  |      | 9     | 0.810810810810811 | 5.73772864685427E-06 | Q9QZ88, Q6P8X1, Q9CWK8, Q9EQH3, Q9D8U8, P40336, Q8C0E2, O08788, Q810B6 | 8.80818884165736E-05 |
| GOTERM_CC_DIRECT:GO:0030906~retromer, cargo-selective complex |      | 3     | 0.27027027027027  | 0.006329891187867    | Q9QZ88, Q9EQH3, P40336                                                 | 0.03908019776857     |

**Annotation Cluster 29** Enrichment Score: 2.691541502007118

| Category | Term | Count | % | PValue | Genes | FDR |
|----------|------|-------|---|--------|-------|-----|
|----------|------|-------|---|--------|-------|-----|

|                                                                   |                                                                               |       |                  |                      |                                                                                                                                                                                                                                                                                                                |                      |  |
|-------------------------------------------------------------------|-------------------------------------------------------------------------------|-------|------------------|----------------------|----------------------------------------------------------------------------------------------------------------------------------------------------------------------------------------------------------------------------------------------------------------------------------------------------------------|----------------------|--|
| KEGG_PATHWAY                                                      | mmu00030: Pentose phosphate pathway                                           | 13    | 1.17117117117117 | 2.45739282313293E-07 | Q91YP3, Q7TSV4, Q9DCD0, Q93092, Q9CS42, P12382, P40142, Q00612, P05063, P05064, Q9WUA3, Q9D0F9, P47857                                                                                                                                                                                                         | 7.15715659737465E-06 |  |
| KEGG_PATHWAY                                                      | mmu00010: Glycolysis / Gluconeogenesis                                        | 16    | 1.44144144144144 | 2.70294451075637E-05 | Q7TSV4, Q3TRM8, P28474, Q9J116, Q9D051, Q8BMF4, Q9JLJ2, P12382, P47738, P05063, P05064, P17182, Q9WUA3, Q9D0F9, Q9QXG4, P47857                                                                                                                                                                                 | 0.000524821725839    |  |
| GOTERM_BP_DIRECT                                                  | GO:006002~fructose 6-phosphate metabolic process                              | 6     | 0.54054054054054 | 3.09945802350111E-05 | P12382, Q88958, Q9WUA3, P47856, P47857, Q93092                                                                                                                                                                                                                                                                 | 0.003856242357573    |  |
| KEGG_PATHWAY                                                      | mmu00051: Fructose and mannose metabolism                                     | 11    | 0.99099099099099 | 5.82889638168781E-05 | P23591, P12382, Q8K0C9, Q3TRM8, P05063, P45376, P05064, P45377, Q9WUA3, P47857, P21300                                                                                                                                                                                                                         | 0.000970094897809    |  |
| UP_KEYWORDS                                                       | Allosteric enzyme                                                             | 9     | 0.81081081081081 | 0.000543388748795    | P12382, P10518, B2RQC6, Q3TRM8, Q9JHR7, Q3V1L4, Q9WUA3, P47857, Q8CIN4                                                                                                                                                                                                                                         | 0.002548305856419    |  |
| GOTERM_BP_DIRECT                                                  | GO:0030388~fructose 1,6-bisphosphate metabolic process                        | 5     | 0.45045045045045 | 0.000609758631396    | P12382, P05063, P05064, Q9WUA3, P47857                                                                                                                                                                                                                                                                         | 0.037157944354025    |  |
| GOTERM_BP_DIRECT                                                  | GO:0061615~glycolytic process through fructose-6-phosphate                    | 4     | 0.36036036036036 | 0.001113761157637    | P12382, P05064, Q9WUA3, P47857                                                                                                                                                                                                                                                                                 | 0.056954799581534    |  |
| UP_KEYWORDS                                                       | Glycolysis                                                                    | 7     | 0.63063063063063 | 0.002889871646276    | P12382, Q3TRM8, P05063, P05064, P17182, Q9WUA3, P47857                                                                                                                                                                                                                                                         | 0.010917292885932    |  |
| GOTERM_CC_DIRECT                                                  | GO:0005945~6-phosphofructokinase complex                                      | 3     | 0.27027027027027 | 0.006329891187867    | P12382, Q9WUA3, P47857                                                                                                                                                                                                                                                                                         | 0.03908019776857     |  |
| <b>Annotation Cluster 30</b> Enrichment Score: 2.6582678921511045 |                                                                               |       |                  |                      |                                                                                                                                                                                                                                                                                                                |                      |  |
| Category                                                          | Term                                                                          | Count | %                | PValue               | Genes                                                                                                                                                                                                                                                                                                          | FDR                  |  |
| INTERPRO                                                          | IPR024969: Rpn11/EIF3F C-terminal domain                                      | 4     | 0.36036036036036 | 0.000357108188197    | Q9DCH4, O35593, O88545, P26516                                                                                                                                                                                                                                                                                 | 0.017998252685127    |  |
| SMART                                                             | SM00232: JAB_MPN                                                              | 5     | 0.45045045045045 | 0.001452835327088    | P46737, Q9DCH4, O35593, O88545, P26516                                                                                                                                                                                                                                                                         | 0.041592414608683    |  |
| INTERPRO                                                          | IPR000555: JAB1/Mov34/MPN/PAD-1                                               | 5     | 0.45045045045045 | 0.002146367556833    | P46737, Q9DCH4, O35593, O88545, P26516                                                                                                                                                                                                                                                                         | 0.07011467352322     |  |
| <b>Annotation Cluster 31</b> Enrichment Score: 2.6261048795905495 |                                                                               |       |                  |                      |                                                                                                                                                                                                                                                                                                                |                      |  |
| Category                                                          | Term                                                                          | Count | %                | PValue               | Genes                                                                                                                                                                                                                                                                                                          | FDR                  |  |
| UP_KEYWORDS                                                       | Lipid metabolism                                                              | 33    | 2.97297297297297 | 0.000652601761562    | Q8VCW8, Q9Z0J0, P19096, Q9EQ06, Q9CQ62, P97823, Q8BLF1, Q8BMP6, Q8K2C9, Q8BLN5, Q8JZK9, Q91V92, Q9QUJ7, Q9EPL9, P45952, P41216, O35405, O35604, Q8VBT6, P51432, Q9Z0M5, P51174, P17439, Q8VDJ3, Q99MZ7, Q9D2R0, O35459, O54950, Q9JHU9, Q9DB29, Q3TCN2, Q8BP40, Q8BG07                                         | 0.002909961953195    |  |
| UP_KEYWORDS                                                       | Fatty acid metabolism                                                         | 14    | 1.26126126126126 | 0.001926794072233    | Q8VCW8, P19096, P51174, Q9CQ62, P97823, Q99MZ7, Q9D2R0, O35459, O54950, Q8K2C9, Q9QUJ7, P45952, Q9EPL9, P41216                                                                                                                                                                                                 | 0.007381520952778    |  |
| GOTERM_BP_DIRECT                                                  | GO:0006629~lipid metabolic process                                            | 38    | 3.42342342342342 | 0.002388889482063    | Q8VCW8, Q9Z0J0, P19096, Q9EQ06, Q9CQ62, P97823, Q8BLF1, Q8BMP6, Q8K2C9, Q8BLN5, Q8JZK9, Q91V92, Q9QUJ7, Q9EPL9, P45952, P41216, O35405, O35604, Q8VBT6, P51432, Q9Z0M5, Q61207, P51174, Q9JL16, Q03265, P17439, Q8VDJ3, P11352, Q99MZ7, Q9D2R0, O35459, Q05816, O54950, Q9JHU9, Q9DB29, Q3TCN2, Q8BP40, Q8BG07 | 0.103256125962112    |  |
| <b>Annotation Cluster 32</b> Enrichment Score: 2.5780058180796197 |                                                                               |       |                  |                      |                                                                                                                                                                                                                                                                                                                |                      |  |
| Category                                                          | Term                                                                          | Count | %                | PValue               | Genes                                                                                                                                                                                                                                                                                                          | FDR                  |  |
| INTERPRO                                                          | IPR006195: Aminoacyl-tRNA synthetase, class II                                | 8     | 0.72072072072072 | 4.9606870757413E-06  | Q8CGC7, Q8BP47, Q8C0C7, Q9CZD3, Q3UQ84, P26638, Q922B2, Q9D0R2                                                                                                                                                                                                                                                 | 0.00043753260008     |  |
| INTERPRO                                                          | IPR002314: Aminoacyl-tRNA synthetase, class II (G/ H/ P/ S), conserved domain | 5     | 0.45045045045045 | 0.000252046935701    | Q8CGC7, Q9CZD3, Q3UQ84, P26638, Q9D0R2                                                                                                                                                                                                                                                                         | 0.013076788075771    |  |
| GOTERM_BP_DIRECT                                                  | GO:0043039~tRNA aminoacylation                                                | 5     | 0.45045045045045 | 0.00212639957517     | Q8CGC7, Q8C0C7, Q3UQ84, Q8BGQ7, Q9D0R2                                                                                                                                                                                                                                                                         | 0.094767598976981    |  |
| <b>Annotation Cluster 33</b> Enrichment Score: 2.5725145209809    |                                                                               |       |                  |                      |                                                                                                                                                                                                                                                                                                                |                      |  |
| Category                                                          | Term                                                                          | Count | %                | PValue               | Genes                                                                                                                                                                                                                                                                                                          | FDR                  |  |
| SMART                                                             | SM00033: CH                                                                   | 13    | 1.17117117117117 | 2.94436960505277E-05 | Q99K51, Q7TPR4, P27870, Q9QXZ0, Q3V0K9, Q62261, Q8BTM8, Q9JKF1, Q9QXS1, Q3UQ44, P57780, Q9ROC8, Q9WVA4                                                                                                                                                                                                         | 0.0016900681533      |  |
| INTERPRO                                                          | IPR001589: Actinin-type, actin-binding, conserved site                        | 8     | 0.72072072072072 | 4.92542495855678E-05 | Q99K51, Q7TPR4, Q9QXZ0, P57780, Q3V0K9, Q8BTM8, Q62261, Q9QXS1                                                                                                                                                                                                                                                 | 0.003475379850758    |  |
| UP_SEQ_FEATURE                                                    | domain: CH 1                                                                  | 8     | 0.72072072072072 | 5.6367708140287E-05  | Q99K51, Q7TPR4, Q9QXZ0, P57780, Q3V0K9, Q8BTM8, Q62261, Q9QXS1                                                                                                                                                                                                                                                 | 0.005780252252931    |  |
| UP_SEQ_FEATURE                                                    | domain: CH 2                                                                  | 8     | 0.72072072072072 | 5.6367708140287E-05  | Q99K51, Q7TPR4, Q9QXZ0, P57780, Q3V0K9, Q8BTM8, Q62261, Q9QXS1                                                                                                                                                                                                                                                 | 0.005780252252931    |  |
| INTERPRO                                                          | IPR001715: Calponin homology domain                                           | 13    | 1.17117117117117 | 0.000147328074604    | Q99K51, Q7TPR4, P27870, Q9QXZ0, Q3V0K9, Q62261, Q8BTM8, Q9JKF1, Q9QXS1, Q3UQ44, P57780, Q9ROC8, Q9WVA4                                                                                                                                                                                                         | 0.008952273020976    |  |
| UP_SEQ_FEATURE                                                    | domain: Actin-binding                                                         | 6     | 0.54054054054054 | 0.000477026336457    | Q7TPR4, Q9QXZ0, P57780, Q8BTM8, Q62261, Q9QXS1                                                                                                                                                                                                                                                                 | 0.046790061523764    |  |
| GOTERM_BP_DIRECT                                                  | GO:0051017~actin filament bundle assembly                                     | 8     | 0.72072072072072 | 0.001397441072317    | Q99K51, Q9ERG0, Q7TPR4, P57780, Q3V0K9, P26040, O70200, Q62418                                                                                                                                                                                                                                                 | 0.067384811746088    |  |
| <b>Annotation Cluster 34</b> Enrichment Score: 2.5637994619434257 |                                                                               |       |                  |                      |                                                                                                                                                                                                                                                                                                                |                      |  |
| Category                                                          | Term                                                                          | Count | %                | PValue               | Genes                                                                                                                                                                                                                                                                                                          | FDR                  |  |
| GOTERM_MF_DIRECT                                                  | GO:0005200~structural constituent of cytoskeleton                             | 18    | 1.62162162162162 | 3.10777628432023E-07 | P03995, Q9WV32, Q922F4, Q62261, Q71LX4, P68372, P59999, Q9QXS1, P48193, P61161, P68369, Q9CVB6, Q9JM76, P68368, Q9D6F9, P20152, P26039, P05213                                                                                                                                                                 | 1.70436994119036E-05 |  |

|                                                                   |                                                    |       |                   |                      |                                                                                                                                                                                                                                                                                        |                   |
|-------------------------------------------------------------------|----------------------------------------------------|-------|-------------------|----------------------|----------------------------------------------------------------------------------------------------------------------------------------------------------------------------------------------------------------------------------------------------------------------------------------|-------------------|
| GOTERM_BP_DIRECT                                                  | GO:0007017~microtubule-based process               | 10    | 0.90090009000901  | 0.000140942560708    | Q8K1R7, P68369, P61759, Q9Z0Y1, P68368, Q922F4, Q9D6F9, P70188, P68372, P05213                                                                                                                                                                                                         | 0.01237807312573  |
| SMART                                                             | SM00864:SM00864                                    | 6     | 0.540540540540541 | 0.001534711343066    | P68369, P68368, Q922F4, Q9D6F9, P68372, P05213                                                                                                                                                                                                                                         | 0.041592414608683 |
| SMART                                                             | SM00865:SM00865                                    | 6     | 0.540540540540541 | 0.001534711343066    | P68369, P68368, Q922F4, Q9D6F9, P68372, P05213                                                                                                                                                                                                                                         | 0.041592414608683 |
| INTERPRO                                                          | IPR017975:Tubulin, conserved site                  | 6     | 0.540540540540541 | 0.001648975689858    | P68369, P68368, Q922F4, Q9D6F9, P68372, P05213                                                                                                                                                                                                                                         | 0.061267827314441 |
| INTERPRO                                                          | IPR018316:Tubulin/FtsZ, 2-layer sandwich domain    | 6     | 0.540540540540541 | 0.001648975689858    | P68369, P68368, Q922F4, Q9D6F9, P68372, P05213                                                                                                                                                                                                                                         | 0.061267827314441 |
| INTERPRO                                                          | IPR000217:Tubulin                                  | 6     | 0.540540540540541 | 0.002084460469524    | P68369, P68368, Q922F4, Q9D6F9, P68372, P05213                                                                                                                                                                                                                                         | 0.069377137136625 |
| INTERPRO                                                          | IPR008280:Tubulin/FtsZ, C-terminal                 | 6     | 0.540540540540541 | 0.002084460469524    | P68369, P68368, Q922F4, Q9D6F9, P68372, P05213                                                                                                                                                                                                                                         | 0.069377137136625 |
| INTERPRO                                                          | IPR023123:Tubulin, C-terminal                      | 6     | 0.540540540540541 | 0.002084460469524    | P68369, P68368, Q922F4, Q9D6F9, P68372, P05213                                                                                                                                                                                                                                         | 0.069377137136625 |
| INTERPRO                                                          | IPR003008:Tubulin/FtsZ, GTPase domain              | 6     | 0.540540540540541 | 0.002084460469524    | P68369, P68368, Q922F4, Q9D6F9, P68372, P05213                                                                                                                                                                                                                                         | 0.069377137136625 |
| <b>Annotation Cluster 35</b> Enrichment Score: 2.4694739997089603 |                                                    |       |                   |                      |                                                                                                                                                                                                                                                                                        |                   |
| Category                                                          | Term                                               | Count | %                 | PValue               | Genes                                                                                                                                                                                                                                                                                  | FDR               |
| UP_KEYWORDS                                                       | GTP-binding                                        | 31    | 2.79279279279279  | 5.79095267886579E-05 | Q8BFR5, Q9Z0N1, Q8BG51, Q922F4, Q9R1T4, Q9WTP7, P35279, P59325, P62331, O55131, Q9D6F9, P42208, P46664, P27601, P56380, Q80UG5, Q35626, P05213, Q9QXB9, P68372, Q6PA06, P32233, Q05144, Q3UM18, P84096, P68369, Q8R050, P84078, P61750, P35276, P68368                                 | 0.00031502782573  |
| GOTERM_MF_DIRECT                                                  | GO:0005525~GTP binding                             | 35    | 3.15315315315315  | 0.001262398159457    | Q8BFR5, Q9Z0N1, Q8BG51, Q922F4, Q9R1T4, Q9WTP7, P35279, P59325, P62331, O55131, Q9D6F9, P42208, P46664, P27601, P56380, Q80UG5, Q35626, P05213, Q9QLC8, Q9CZ30, Q9QXB9, P14824, P68372, Q6PA06, P32233, Q9EQP2, Q05144, Q3UM18, P84096, P68369, Q8R050, P84078, P61750, P35276, P68368 | 0.032885472053857 |
| <b>Annotation Cluster 36</b> Enrichment Score: 2.43839802553254   |                                                    |       |                   |                      |                                                                                                                                                                                                                                                                                        |                   |
| Category                                                          | Term                                               | Count | %                 | PValue               | Genes                                                                                                                                                                                                                                                                                  | FDR               |
| UP_KEYWORDS                                                       | DNA replication                                    | 13    | 1.17117117117117  | 0.000553109503195    | Q9CY94, P97386, P97310, P97311, Q8R3C0, Q99MD9, P39749, Q920B9, Q8VVE4, P49718, Q9D2L9, P17918, Q8R323                                                                                                                                                                                 | 0.002549928557102 |
| <b>Annotation Cluster 37</b> Enrichment Score: 2.376545878489653  |                                                    |       |                   |                      |                                                                                                                                                                                                                                                                                        |                   |
| Category                                                          | Term                                               | Count | %                 | PValue               | Genes                                                                                                                                                                                                                                                                                  | FDR               |
| INTERPRO                                                          | IPR017926:Glutamine amidotransferase               | 4     | 0.36036036036036  | 0.001667151763658    | B2RQC6, Q3THK7, P70698, Q5SUR0                                                                                                                                                                                                                                                         | 0.061267827314441 |
| GOTERM_BP_DIRECT                                                  | GO:0006541~glutamine metabolic process             | 6     | 0.540540540540541 | 0.002420605766024    | B2RQC6, Q3THK7, P47856, P70698, Q5SUR0, Q9JHW2                                                                                                                                                                                                                                         | 0.103256125962112 |
| UP_KEYWORDS                                                       | Glutamine amidotransferase                         | 4     | 0.36036036036036  | 0.003398194818803    | Q3THK7, P47856, P70698, Q5SUR0                                                                                                                                                                                                                                                         | 0.012208275684488 |
| <b>Annotation Cluster 38</b> Enrichment Score: 2.278357354943106  |                                                    |       |                   |                      |                                                                                                                                                                                                                                                                                        |                   |
| Category                                                          | Term                                               | Count | %                 | PValue               | Genes                                                                                                                                                                                                                                                                                  | FDR               |
| GOTERM_BP_DIRECT                                                  | GO:0046034~ATP metabolic process                   | 9     | 0.810810810810811 | 0.000644019904765    | Q91VD9, P56135, Q9CPQ8, Q9CZ30, Q9WTP7, Q03265, P50516, O08739, P62814                                                                                                                                                                                                                 | 0.038460868712572 |
| GOTERM_BP_DIRECT                                                  | GO:0015991~ATP hydrolysis coupled proton transport | 8     | 0.720720720720721 | 0.000967438747444    | P50518, Q8BVE3, Q03265, P56383, P50516, P62814, P51863, Q9Z1G3                                                                                                                                                                                                                         | 0.054505133959742 |
| <b>Annotation Cluster 39</b> Enrichment Score: 2.2360086346064105 |                                                    |       |                   |                      |                                                                                                                                                                                                                                                                                        |                   |
| Category                                                          | Term                                               | Count | %                 | PValue               | Genes                                                                                                                                                                                                                                                                                  | FDR               |
| GOTERM_BP_DIRECT                                                  | GO:0045454~cell redox homeostasis                  | 13    | 1.17117117117117  | 7.00008326300767E-05 | P28352, O08807, P99029, Q9JMH6, Q8R2E9, P11352, Q8R180, P35700, Q8C0L0, Q9JLT4, Q61171, Q9CQM9, Q91VW3                                                                                                                                                                                 | 0.008039326393593 |
| UP_KEYWORDS                                                       | Peroxidase                                         | 7     | 0.630630630630631 | 0.000210240029655    | O70325, O08807, P24270, P99029, Q61171, P11352, P35700                                                                                                                                                                                                                                 | 0.0010631232793   |
| GOTERM_BP_DIRECT                                                  | GO:0042744~hydrogen peroxide catabolic process     | 6     | 0.540540540540541 | 0.000400207349998    | P24270, P99029, Q61171, Q9JMH6, P11352, P35700                                                                                                                                                                                                                                         | 0.027791142955654 |
| INTERPRO                                                          | IPR012336:Thioredoxin-like fold                    | 17    | 1.53153153153153  | 0.00043935560273     | P10649, O70325, O08807, Q9D8N0, P99029, P11352, P35700, Q9CQ75, Q8CGC7, Q8C0L0, Q9JJU8, Q61171, Q3TDN2, Q9CQM9, O09131, Q91VW3, Q9QYB1                                                                                                                                                 | 0.020946575222027 |
| UP_KEYWORDS                                                       | Redox-active center                                | 9     | 0.810810810810811 | 0.000631373438787    | Q8C0L0, Q9JLT4, O08807, P99029, Q61171, Q9JMH6, Q8R2E9, Q8R180, P35700                                                                                                                                                                                                                 | 0.00286226255833  |
| GOTERM_BP_DIRECT                                                  | GO:0006979~response to oxidative stress            | 16    | 1.44144144144144  | 0.002381251834053    | P10518, P62908, O70325, P24270, P99029, Q9JMH6, P31750, P11352, P35700, Q9JLV6, Q00612, Q61171, O88844, Q6P9R2, P28867, Q99JF8                                                                                                                                                         | 0.103256125962112 |
| <b>Annotation Cluster 40</b> Enrichment Score: 2.225303263587286  |                                                    |       |                   |                      |                                                                                                                                                                                                                                                                                        |                   |
| Category                                                          | Term                                               | Count | %                 | PValue               | Genes                                                                                                                                                                                                                                                                                  | FDR               |
| GOTERM_CC_DIRECT                                                  | GO:0008180~COP9 signalosome                        | 7     | 0.630630630630631 | 0.003824326533221    | Q8VBV7, Q8VDD5, O08917, O88544, Q03265, O88545, P61202                                                                                                                                                                                                                                 | 0.02555549965729  |
| UP_KEYWORDS                                                       | Signalosome                                        | 4     | 0.36036036036036  | 0.006842645579295    | Q8VBV7, O88544, O88545, P61202                                                                                                                                                                                                                                                         | 0.022697556067906 |

|                                                                   |                                                     |       |                   |                   |                                                                                                                                                                |                   |
|-------------------------------------------------------------------|-----------------------------------------------------|-------|-------------------|-------------------|----------------------------------------------------------------------------------------------------------------------------------------------------------------|-------------------|
| <b>Annotation Cluster 41</b> Enrichment Score: 2.2013648150410914 |                                                     |       |                   |                   |                                                                                                                                                                |                   |
| Category                                                          | Term                                                | Count | %                 | PValue            | Genes                                                                                                                                                          | FDR               |
| KEGG_PATHWAY                                                      | mmu05100:Bacterial invasion of epithelial cells     | 15    | 1.35135135135135  | 0.000692260657827 | Q8BH43, Q9WV32, Q9R1T4, P26450, Q68FD5, P59999, P70315, P84096, Q9CVB6, Q9JM76, Q9JLQ0, Q8BPU7, P42208, P22682, Q80UG5                                         | 0.008064836663683 |
| GOTERM_BP_DIRECT                                                  | GO:0034314~Arp2/3 complex-mediated actin nucleation | 6     | 0.540540540540541 | 0.00080394778129  | Q3UQ44, P61161, Q9WV32, Q9CVB6, Q9JM76, P59999                                                                                                                 | 0.047070354410402 |
| GOTERM_CC_DIRECT                                                  | GO:0005885~Arp2/3 protein complex                   | 5     | 0.450450450450451 | 0.001196711823564 | P61161, Q9WV32, Q9CVB6, Q9JM76, P59999                                                                                                                         | 0.009996063467417 |
| <b>Annotation Cluster 42</b> Enrichment Score: 2.0912103543341356 |                                                     |       |                   |                   |                                                                                                                                                                |                   |
| Category                                                          | Term                                                | Count | %                 | PValue            | Genes                                                                                                                                                          | FDR               |
| UP_KEYWORDS                                                       | Amino-acid biosynthesis                             | 7     | 0.630630630630631 | 0.000448650350739 | Q99K85, Q91Y10, Q8BGB7, Q8VCN5, P05201, Q9WVQ5, Q922D8                                                                                                         | 0.00221877991638  |
| GOTERM_BP_DIRECT                                                  | GO:0008652~cellular amino acid biosynthetic process | 7     | 0.630630630630631 | 0.001125362751276 | Q99K85, Q91Y10, Q8BGB7, Q8VCN5, P05201, Q9WVQ5, Q922D8                                                                                                         | 0.056954799581534 |
| UP_KEYWORDS                                                       | Methionine biosynthesis                             | 3     | 0.27027027027027  | 0.040688922883113 | Q8BGB7, Q9WVQ5, Q922D8                                                                                                                                         | 0.098151618205237 |
| <b>Annotation Cluster 43</b> Enrichment Score: 2.0877824654812085 |                                                     |       |                   |                   |                                                                                                                                                                |                   |
| Category                                                          | Term                                                | Count | %                 | PValue            | Genes                                                                                                                                                          | FDR               |
| UP_KEYWORDS                                                       | SH3 domain                                          | 20    | 1.8018018018018   | 0.001099616219704 | P70290, P27870, Q9QXZ0, O70145, P26450, Q80TY0, A2AAY5, Q62418, Q9Z0R6, Q3UNDO, P97369, O08539, Q61792, P70248, P97814, Q8C3J5, Q09014, Q8CBW3, Q9JLQ0, Q9R0C8 | 0.004601470950145 |
| SMART                                                             | SM00326:SH3                                         | 19    | 1.71171171171171  | 0.003064638686487 | P70290, P27870, O70145, P26450, Q80TY0, A2AAY5, Q62418, Q9Z0R6, Q3UNDO, P97369, O08539, Q61792, P70248, P97814, Q8C3J5, Q09014, Q8CBW3, Q9JLQ0, Q9R0C8         | 0.067657792540142 |
| <b>Annotation Cluster 44</b> Enrichment Score: 2.032899025060787  |                                                     |       |                   |                   |                                                                                                                                                                |                   |
| Category                                                          | Term                                                | Count | %                 | PValue            | Genes                                                                                                                                                          | FDR               |
| UP_KEYWORDS                                                       | Tricarboxylic acid cycle                            | 6     | 0.540540540540541 | 0.003218244082614 | Q9Z219, P14152, O88844, P28271, Q9D051, Q8BMF4                                                                                                                 | 0.011829221492853 |
| <b>Annotation Cluster 45</b> Enrichment Score: 2.0325529074081596 |                                                     |       |                   |                   |                                                                                                                                                                |                   |
| Category                                                          | Term                                                | Count | %                 | PValue            | Genes                                                                                                                                                          | FDR               |
| UP_KEYWORDS                                                       | mRNA transport                                      | 12    | 1.08108108108108  | 0.000835633037227 | Q6PB66, Q61655, Q8BL97, Q5SF07, O08583, Q9CPN8, Q8BJ71, O88569, Q6P5F9, Q9CWU9, P35922, Q8R4R6                                                                 | 0.003634299789073 |
| <b>Annotation Cluster 46</b> Enrichment Score: 1.9999608282299022 |                                                     |       |                   |                   |                                                                                                                                                                |                   |
| Category                                                          | Term                                                | Count | %                 | PValue            | Genes                                                                                                                                                          | FDR               |
| UP_SEQ_FEATURE                                                    | domain:PX                                           | 9     | 0.810810810810811 | 0.001360174777651 | Q6P8X1, Q9CWK8, Q80TM9, Q9D8U8, Q3TC93, A2AAY5, P97369, Q91YJ2, Q09014                                                                                         | 0.10959122494216  |
| INTERPRO                                                          | IPR001683:Phox homologous domain                    | 9     | 0.810810810810811 | 0.001928161977935 | Q6P8X1, Q9CWK8, Q80TM9, Q9D8U8, Q3TC93, A2AAY5, P97369, Q91YJ2, Q09014                                                                                         | 0.069377137136625 |
| <b>Annotation Cluster 47</b> Enrichment Score: 1.998582452290484  |                                                     |       |                   |                   |                                                                                                                                                                |                   |
| Category                                                          | Term                                                | Count | %                 | PValue            | Genes                                                                                                                                                          | FDR               |
| GOTERM_BP_DIRECT                                                  | GO:0043171~peptide catabolic process                | 7     | 0.630630630630631 | 0.000538232659017 | Q99JW2, P24527, Q9JHR7, P97449, Q11011, Q9D1A2, O89023                                                                                                         | 0.033482556663027 |
| GOTERM_MF_DIRECT                                                  | GO:0070006~metalloaminopeptidase activity           | 6     | 0.540540540540541 | 0.002192726441027 | Q6P1B1, P24527, Q8BP48, P97449, Q9Z2W0, Q11011                                                                                                                 | 0.048613211735107 |
| <b>Annotation Cluster 48</b> Enrichment Score: 1.9854443501796497 |                                                     |       |                   |                   |                                                                                                                                                                |                   |
| Category                                                          | Term                                                | Count | %                 | PValue            | Genes                                                                                                                                                          | FDR               |
| UP_KEYWORDS                                                       | Metalloprotease                                     | 16    | 1.44144144144144  | 0.000893334617017 | Q8K411, Q11136, Q6P1B1, P34960, O35593, Q80W54, P97449, P46737, Q99KK7, P24527, Q9JHR7, Q9DC61, Q9Z2W0, Q9D1A2, Q11011, O89001                                 | 0.003796672122321 |
| <b>Annotation Cluster 49</b> Enrichment Score: 1.9671926829835977 |                                                     |       |                   |                   |                                                                                                                                                                |                   |
| Category                                                          | Term                                                | Count | %                 | PValue            | Genes                                                                                                                                                          | FDR               |
| GOTERM_CC_DIRECT                                                  | GO:0005777~peroxisome                               | 17    | 1.53153153153153  | 0.000403906261093 | P52760, P24270, P99029, Q99MZ7, O35459, Q8C0L6, P40142, Q2TPA8, Q9JHR7, O88844, Q9QUJ7, P20152, Q9EPB5, Q922Q1, Q9EPL9, P41216, Q00519                         | 0.003955495798294 |
| UP_KEYWORDS                                                       | Peroxisome                                          | 12    | 1.08108108108108  | 0.004837878578276 | O35459, Q8C0L6, Q2TPA8, P24270, P99029, Q9QUJ7, Q9EPB5, Q922Q1, Q9EPL9, P41216, Q00519, Q99MZ7                                                                 | 0.016448787166138 |
| GOTERM_CC_DIRECT                                                  | GO:0005782~peroxisomal matrix                       | 5     | 0.450450450450451 | 0.006899793450854 | Q8C0L6, Q9JHR7, P99029, Q9EPL9, P35700                                                                                                                         | 0.04125350189563  |

| Annotation Cluster 50 |                                                                          | Enrichment Score: 1.9591284792285628 |                   |                      |                                                                                                                                                                                                                                                |                     |  |
|-----------------------|--------------------------------------------------------------------------|--------------------------------------|-------------------|----------------------|------------------------------------------------------------------------------------------------------------------------------------------------------------------------------------------------------------------------------------------------|---------------------|--|
| Category              | Term                                                                     | Count                                | %                 | PValue               | Genes                                                                                                                                                                                                                                          | FDR                 |  |
| KEGG_PATHWAY          | mmu00190:Oxidative phosphorylation                                       | 22                                   | 1.98198198198198  | 0.000434256341412    | Q9CR68, P56135, Q8BVE3, Q9CPQ8, Q9D855, P99028, Q9CR51, Q03265, Q9CQZ6, Q91VM9, P50516, P51863, Q9CPQ1, Q9Z1G3, Q9CQ75, Q91VD9, P50518, P56383, Q9CQH3, P62814, Q8R1I1, Q9D819                                                                 | 0.00562120708606    |  |
| UP_KEYWORDS           | Electron transport                                                       | 13                                   | 1.17117117117117  | 0.001596769293938    | Q9CR68, Q9D855, P99028, Q8R2E9, Q9CQZ6, Q9CQX2, Q61462, Q8R180, Q9CQ75, Q91VD9, Q8CQO1, Q9CQH3, Q8R1I1                                                                                                                                         | 0.006482406685837   |  |
| KEGG_PATHWAY          | mmu05010:Alzheimer's disease                                             | 22                                   | 1.98198198198198  | 0.008792721346468    | Q9CR68, P51432, P57716, Q64518, Q8VBW6, Q9D855, P99028, O08529, Q03265, Q9CQZ6, P70677, Q9CPQ1, Q9CQ75, Q91VD9, P63085, Q9JHR7, P63328, P56383, Q9CQH3, Q8R1I1, O89110, P49615                                                                 | 0.07316800263311    |  |
| Annotation Cluster 51 |                                                                          | Enrichment Score: 1.9173620357575265 |                   |                      |                                                                                                                                                                                                                                                |                     |  |
| Category              | Term                                                                     | Count                                | %                 | PValue               | Genes                                                                                                                                                                                                                                          | FDR                 |  |
| GOTERM_CC_DIRECT      | GO:0005694~chromosome                                                    | 30                                   | 2.7027027027027   | 0.001617414127565    | Q8CG48, P54276, Q9R1T4, Q6P5D8, P15864, Q920B9, Q64522, O55131, Q9Z0Y1, Q8K2Z4, P43274, P43275, P42208, P43277, P62715, Q9WUB4, Q8R1Q8, Q9JK91, Q61686, P27661, P35922, Q6NVF4, Q76MZ3, Q3UM45, P0C0S6, Q9QZQ8, Q9CWU9, Q5DW34, Q9WVA3, E9PVX6 | 0.012584811293934   |  |
| UP_KEYWORDS           | Chromosome                                                               | 30                                   | 2.7027027027027   | 0.003642954308448    | Q8CG48, P54276, Q9R1T4, Q6P5D8, P15864, Q920B9, Q64522, O55131, A2AGT5, Q9Z0Y1, Q8K2Z4, P43274, P43275, P42208, P43277, P62715, Q9WUB4, P84228, Q8R1Q8, Q61686, P27661, P35922, Q6NVF4, Q76MZ3, P0C0S6, Q9QZQ8, Q9CWU9, Q5DW34, Q9WVA3, E9PVX6 | 0.012868617816854   |  |
| UP_KEYWORDS           | Centromere                                                               | 13                                   | 1.17117117117117  | 0.00989560545328     | Q61686, Q9R1T4, P35922, Q76MZ3, O55131, A2AGT5, Q9Z0Y1, Q9CWU9, P62715, P42208, Q9WUB4, Q9WVA3, Q8R1Q8                                                                                                                                         | 0.031083600471665   |  |
| GOTERM_CC_DIRECT      | GO:000776~kinetochore                                                    | 13                                   | 1.17117117117117  | 0.010353507104708    | Q61686, Q9R1T4, Q6P5F9, O08788, O55131, A2AGT5, Q9Z0Y1, Q9CWU9, P42208, Q9WUB4, Q9WVA3, Q8R1Q8, Q6ZQL4                                                                                                                                         | 0.058225663717564   |  |
| GOTERM_CC_DIRECT      | GO:000775~chromosome, centromeric region                                 | 14                                   | 1.26126126126126  | 0.014838801388392    | Q61686, P23198, Q9R1T4, P35922, Q76MZ3, O55131, Q9Z0Y1, Q9CWU9, P62715, P42208, Q9WUB4, Q9WVA3, Q8R1Q8, E9PVX6                                                                                                                                 | 0.07944288243809    |  |
| UP_KEYWORDS           | Kinetochore                                                              | 9                                    | 0.81081081081081  | 0.043492175392883    | O55131, A2AGT5, Q9Z0Y1, Q9R1T4, P42208, Q9CWU9, Q9WUB4, Q9WVA3, Q8R1Q8                                                                                                                                                                         | 0.102424539821265   |  |
| Annotation Cluster 52 |                                                                          | Enrichment Score: 1.9104178018469977 |                   |                      |                                                                                                                                                                                                                                                |                     |  |
| Category              | Term                                                                     | Count                                | %                 | PValue               | Genes                                                                                                                                                                                                                                          | FDR                 |  |
| SMART                 | SM00515:eIF5C                                                            | 5                                    | 0.450450450450451 | 0.000122837883937    | Q62448, Q6NZJ6, P59325, Q80X13, Q2L4X1                                                                                                                                                                                                         | 0.00587545448337    |  |
| INTERPRO              | IPR003307:W2 domain                                                      | 5                                    | 0.450450450450451 | 0.000130714920465    | Q62448, Q6NZJ6, P59325, Q80X13, Q2L4X1                                                                                                                                                                                                         | 0.008540041470368   |  |
| UP_SEQ_FEATURE        | domain:W2                                                                | 5                                    | 0.450450450450451 | 0.000704434374218    | Q62448, Q6NZJ6, P59325, Q80X13, Q2L4X1                                                                                                                                                                                                         | 0.06150697964946    |  |
| Annotation Cluster 53 |                                                                          | Enrichment Score: 1.9000720797270978 |                   |                      |                                                                                                                                                                                                                                                |                     |  |
| Category              | Term                                                                     | Count                                | %                 | PValue               | Genes                                                                                                                                                                                                                                          | FDR                 |  |
| UP_KEYWORDS           | Hydrogen ion transport                                                   | 11                                   | 0.990990990990991 | 1.21333361529685E-05 | P50518, Q8BVE3, P56135, Q9CPQ8, Q9CR51, Q03265, P56383, P50516, P62814, P51863, Q9Z1G3                                                                                                                                                         | 8.6849142989691E-05 |  |
| KEGG_PATHWAY          | mmu00190:Oxidative phosphorylation                                       | 22                                   | 1.98198198198198  | 0.000434256341412    | Q9CR68, P56135, Q8BVE3, Q9CPQ8, Q9D855, P99028, Q9CR51, Q03265, Q9CQZ6, Q91VM9, P50516, P51863, Q9CPQ1, Q9Z1G3, Q9CQ75, Q91VD9, P50518, P56383, Q9CQH3, P62814, Q8R1I1, Q9D819                                                                 | 0.00562120708606    |  |
| GOTERM_BP_DIRECT      | GO:0015992~proton transport                                              | 11                                   | 0.990990990990991 | 0.000494515558861    | P50518, Q8BVE3, P56135, Q9CPQ8, Q9CR51, Q03265, P56383, P50516, P62814, P51863, Q9Z1G3                                                                                                                                                         | 0.031417520399158   |  |
| GOTERM_BP_DIRECT      | GO:0015991~ATP hydrolysis coupled proton transport                       | 8                                    | 0.720720720720721 | 0.000967438747444    | P50518, Q8BVE3, Q03265, P56383, P50516, P62814, P51863, Q9Z1G3                                                                                                                                                                                 | 0.054505133959742   |  |
| KEGG_PATHWAY          | mmu04721:Synaptic vesicle cycle                                          | 12                                   | 1.08108108108108  | 0.002789873467061    | P50518, P46460, Q8BVE3, Q9CR51, Q68FD5, P50516, P62814, P51863, P17427, P17426, P84091, Q9Z1G3                                                                                                                                                 | 0.02954729626478    |  |
| GOTERM_MF_DIRECT      | GO:0008553~hydrogen-exporting ATPase activity, phosphorylative mechanism | 5                                    | 0.450450450450451 | 0.004481910421556    | P50518, Q9CPQ8, Q9CR51, P51863, Q9Z1G3                                                                                                                                                                                                         | 0.083395547486807   |  |
| Annotation Cluster 54 |                                                                          | Enrichment Score: 1.888121326960176  |                   |                      |                                                                                                                                                                                                                                                |                     |  |
| Category              | Term                                                                     | Count                                | %                 | PValue               | Genes                                                                                                                                                                                                                                          | FDR                 |  |
| UP_KEYWORDS           | Actin capping                                                            | 4                                    | 0.36036036036036  | 0.031257824186654    | P26043, P47753, Q62261, P47754                                                                                                                                                                                                                 | 0.080972649321617   |  |
| Annotation Cluster 55 |                                                                          | Enrichment Score: 1.873168453696123  |                   |                      |                                                                                                                                                                                                                                                |                     |  |
| Category              | Term                                                                     | Count                                | %                 | PValue               | Genes                                                                                                                                                                                                                                          | FDR                 |  |
| GOTERM_MF_DIRECT      | GO:0009055~electron carrier activity                                     | 11                                   | 0.990990990990991 | 0.000302114498358    | Q91VD9, Q9D7B6, P51174, G3X982, Q9CQM9, Q91VW3, Q61462, P45952, Q9EPL9, Q8JZN5, Q00519                                                                                                                                                         | 0.009653839463129   |  |
| GOTERM_MF_DIRECT      | GO:000062~fatty-acyl-CoA binding                                         | 8                                    | 0.720720720720721 | 0.001694923130198    | Q9D7B6, Q8BMP6, P51174, P45952, Q9EPL9, Q91V12, Q8JZN5, P31786                                                                                                                                                                                 | 0.041072323294558   |  |



|                                                                   |                                                                             |       |                   |                   |                                                                                                                                                                                                                                                                                |                   |
|-------------------------------------------------------------------|-----------------------------------------------------------------------------|-------|-------------------|-------------------|--------------------------------------------------------------------------------------------------------------------------------------------------------------------------------------------------------------------------------------------------------------------------------|-------------------|
| UP_KEYWORDS                                                       | Flavoprotein                                                                | 13    | 1.17117117117117  | 0.00785478121626  | Q8CFV9, P51174, Q9JMH6, Q8R2E9, Q8R180, Q8JZN5, Q8COL6, Q9D7B6, Q9JLT4, G3X982, P45952, Q9EPL9, Q00519                                                                                                                                                                         | 0.025740969768948 |
| UP_KEYWORDS                                                       | FAD                                                                         | 12    | 1.08108108108108  | 0.009942181033216 | Q8COL6, Q9D7B6, Q9JLT4, P51174, Q9JMH6, Q8R2E9, G3X982, P45952, Q9EPL9, Q8R180, Q8JZN5, Q00519                                                                                                                                                                                 | 0.031083600471665 |
| <b>Annotation Cluster 56</b> Enrichment Score: 1.8510354542174643 |                                                                             |       |                   |                   |                                                                                                                                                                                                                                                                                |                   |
| Category                                                          | Term                                                                        | Count | %                 | PValue            | Genes                                                                                                                                                                                                                                                                          | FDR               |
| INTERPRO                                                          | IPR011993:Pleckstrin homology-like domain                                   | 34    | 3.06306306306306  | 0.00102835762221  | P27870, P98078, P26041, P70460, P26040, P26043, Q9Z0R6, Q69ZK0, Q62261, Q71LX4, Q9ERS5, P31750, P48193, Q61210, Q80YW0, Q8R5A3, Q9QVP9, Q5DU25, Q9JM90, Q8K298, P26039, Q8R1F1, P51432, Q9CT10, Q3UND0, Q9CR95, Q9Z2A0, Q9JHK5, P70315, Q8K1B8, Q8BYW1, Q9R0C8, Q8BPU7, Q8K124 | 0.042186577804165 |
| <b>Annotation Cluster 57</b> Enrichment Score: 1.8265762565031798 |                                                                             |       |                   |                   |                                                                                                                                                                                                                                                                                |                   |
| Category                                                          | Term                                                                        | Count | %                 | PValue            | Genes                                                                                                                                                                                                                                                                          | FDR               |
| GOTERM_BP_DIRECT                                                  | GO:2000643~positive regulation of early endosome to late endosome transport | 5     | 0.450450450450451 | 0.000352530164211 | P98078, P26041, P26040, P26043, Q91W86                                                                                                                                                                                                                                         | 0.025063215960323 |
| GOTERM_BP_DIRECT                                                  | GO:1902115~regulation of organelle assembly                                 | 4     | 0.36036036036036  | 0.000462539102969 | P26041, P26040, P26043, Q91W86                                                                                                                                                                                                                                                 | 0.030346706243628 |
| INTERPRO                                                          | IPR014352:FERM/acyl-CoA-binding protein, 3-helical bundle                   | 10    | 0.900900900900901 | 0.000488037572199 | Q8K1B8, P26041, Q8BMP6, P26040, P26043, Q9QVP9, Q71LX4, P48193, P31786, P26039                                                                                                                                                                                                 | 0.022655217825234 |
| GOTERM_MF_DIRECT                                                  | GO:0008092~cytoskeletal protein binding                                     | 12    | 1.08108108108108  | 0.000614469200006 | O89053, P61161, P26041, P26040, P26043, P05063, O08529, P05064, P07356, Q9QXS1, P48193, P49615                                                                                                                                                                                 | 0.018293625897323 |
| SMART                                                             | SM00295:B41                                                                 | 8     | 0.720720720720721 | 0.005682171174512 | Q8K1B8, P26041, P26040, P26043, Q9QVP9, Q71LX4, P48193, P26039                                                                                                                                                                                                                 | 0.095928419240283 |
| GOTERM_CC_DIRECT                                                  | GO:0019898~extrinsic component of membrane                                  | 11    | 0.990990990990991 | 0.006162180608643 | Q6P8X1, Q9CWK8, P26041, Q9D8U8, P10107, P26040, P26043, O70310, Q91YJ2, P48193, Q90914                                                                                                                                                                                         | 0.03908019776857  |
| <b>Annotation Cluster 58</b> Enrichment Score: 1.807128533453858  |                                                                             |       |                   |                   |                                                                                                                                                                                                                                                                                |                   |
| Category                                                          | Term                                                                        | Count | %                 | PValue            | Genes                                                                                                                                                                                                                                                                          | FDR               |
| SMART                                                             | SM00182:CULLIN                                                              | 4     | 0.36036036036036  | 0.002697606713293 | Q9D4H8, Q9D5V5, Q9WTX6, A2A432                                                                                                                                                                                                                                                 | 0.0645177605596   |
| SMART                                                             | SM00884:SM00884                                                             | 4     | 0.36036036036036  | 0.004173959091763 | Q9D4H8, Q9D5V5, Q9WTX6, A2A432                                                                                                                                                                                                                                                 | 0.079861750622394 |
| <b>Annotation Cluster 59</b> Enrichment Score: 1.8045761338347768 |                                                                             |       |                   |                   |                                                                                                                                                                                                                                                                                |                   |
| Category                                                          | Term                                                                        | Count | %                 | PValue            | Genes                                                                                                                                                                                                                                                                          | FDR               |
| GOTERM_BP_DIRECT                                                  | GO:0046034~ATP metabolic process                                            | 9     | 0.810810810810811 | 0.000644019904765 | Q91VD9, P56135, Q9CPQ8, Q9CZ30, Q9WTP7, Q03265, P50516, O08739, P62814                                                                                                                                                                                                         | 0.038460868712572 |
| <b>Annotation Cluster 60</b> Enrichment Score: 1.7815641885608242 |                                                                             |       |                   |                   |                                                                                                                                                                                                                                                                                |                   |
| Category                                                          | Term                                                                        | Count | %                 | PValue            | Genes                                                                                                                                                                                                                                                                          | FDR               |
| GOTERM_MF_DIRECT                                                  | GO:0048027~mRNA 5'-UTR binding                                              | 5     | 0.450450450450451 | 0.001107695571189 | Q5SF07, Q9CPN8, P28271, P35922, Q62167                                                                                                                                                                                                                                         | 0.029595353466122 |
| SMART                                                             | SM00322:KH                                                                  | 7     | 0.630630630630631 | 0.006246783121819 | Q9CPS7, Q5SF07, Q9CPN8, Q60749, Q8VDDJ3, P35922, Q61584                                                                                                                                                                                                                        | 0.099601486442336 |
| <b>Annotation Cluster 61</b> Enrichment Score: 1.7732107861348325 |                                                                             |       |                   |                   |                                                                                                                                                                                                                                                                                |                   |
| Category                                                          | Term                                                                        | Count | %                 | PValue            | Genes                                                                                                                                                                                                                                                                          | FDR               |
| UP_KEYWORDS                                                       | Redox-active center                                                         | 9     | 0.810810810810811 | 0.000631373438787 | Q8COL0, Q9JLT4, O08807, P99029, Q61171, Q9JMH6, Q8R2E9, Q8R180, P35700                                                                                                                                                                                                         | 0.002862226255833 |
| <b>Annotation Cluster 62</b> Enrichment Score: 1.702619066623082  |                                                                             |       |                   |                   |                                                                                                                                                                                                                                                                                |                   |
| Category                                                          | Term                                                                        | Count | %                 | PValue            | Genes                                                                                                                                                                                                                                                                          | FDR               |
| KEGG_PATHWAY                                                      | mmu00040:~Pentose and glucuronate interconversions                          | 10    | 0.900900900900901 | 0.000259542407748 | Q9DBB8, P45376, Q9JII6, Q99KP3, P45377, Q6ZQM8, P12265, Q91X52, Q91ZJ5, P21300                                                                                                                                                                                                 | 0.003557257706188 |
| <b>Annotation Cluster 63</b> Enrichment Score: 1.6799066987171134 |                                                                             |       |                   |                   |                                                                                                                                                                                                                                                                                |                   |
| Category                                                          | Term                                                                        | Count | %                 | PValue            | Genes                                                                                                                                                                                                                                                                          | FDR               |
| UP_KEYWORDS                                                       | DNA repair                                                                  | 21    | 1.89189189189189  | 0.012603544734794 | P62908, P27661, P97386, P28352, P54276, Q99K48, O35593, Q9WTM5, Q9WUP7, P11103, A2A432, P39749, P54726, Q920B9, P46737, Q8VEE4, Q9JLV6, Q8BP27, P17918, P43247, Q9JK91                                                                                                         | 0.038956410998453 |
| UP_KEYWORDS                                                       | DNA damage                                                                  | 22    | 1.98198198198198  | 0.040933027448589 | P62908, P27661, P97386, P28352, P54276, Q99K48, O35593, Q9WTM5, Q9WUP7, P11103, A2A432, P39749, P54726, P35922, Q920B9, P46737, Q8VEE4, Q9JLV6, Q8BP27, P17918, P43247, Q9JK91                                                                                                 | 0.098151618205237 |

|                                                                   |                                                        |       |                   |                      |                                                                                                                                                        |                      |
|-------------------------------------------------------------------|--------------------------------------------------------|-------|-------------------|----------------------|--------------------------------------------------------------------------------------------------------------------------------------------------------|----------------------|
| <b>Annotation Cluster 64</b> Enrichment Score: 1.6595703915995288 |                                                        |       |                   |                      |                                                                                                                                                        |                      |
| Category                                                          | Term                                                   | Count | %                 | PValue               | Genes                                                                                                                                                  | FDR                  |
| SMART                                                             | SM00165:UBA                                            | 7     | 0.630630630630631 | 0.003536161194484    | Q922Y1, Q91VX2, P56399, P22682, P54726, Q8R317, Q80X50                                                                                                 | 0.072491304486915    |
| <b>Annotation Cluster 65</b> Enrichment Score: 1.602188643342761  |                                                        |       |                   |                      |                                                                                                                                                        |                      |
| Category                                                          | Term                                                   | Count | %                 | PValue               | Genes                                                                                                                                                  | FDR                  |
| UP_KEYWORDS                                                       | Citrullination                                         | 12    | 1.08108108108108  | 0.001748796296666    | P03995, O08583, Q9D8E6, Q922K7, P43274, P19253, P43275, P43277, P15864, P84228, Q99JF8, Q64522                                                         | 0.006795322752759    |
| GOTERM_CC_DIRECT                                                  | GO:0005719~nuclear euchromatin                         | 7     | 0.630630630630631 | 0.002309194927403    | P23198, P0C0S6, P43275, Q9WTM5, P43277, P15864, P35700                                                                                                 | 0.017034061282664    |
| GOTERM_MF_DIRECT                                                  | GO:0031490~chromatin DNA binding                       | 10    | 0.900900900900901 | 0.005551855029641    | Q04207, P28352, P57780, P0C0S6, P43274, Q9QZQ8, P43275, Q9WTM5, P43277, P15864                                                                         | 0.101491805980461    |
| <b>Annotation Cluster 66</b> Enrichment Score: 1.5989759993741295 |                                                        |       |                   |                      |                                                                                                                                                        |                      |
| Category                                                          | Term                                                   | Count | %                 | PValue               | Genes                                                                                                                                                  | FDR                  |
| UP_KEYWORDS                                                       | Thiol protease                                         | 19    | 1.71171171171171  | 1.09437261345234E-05 | P10605, P29452, Q9JMA1, P56399, Q9JKB1, Q9DCH4, Q8K2H2, O08529, O70370, Q9WUP7, P35123, Q9WUU7, P70677, Q99K23, Q80U87, O89017, Q8CDG3, Q8R016, O89110 | 8.26859307941771E-05 |
| GOTERM_MF_DIRECT                                                  | GO:0008234~cysteine-type peptidase activity            | 19    | 1.71171171171171  | 0.000305735798736    | P10605, P29452, Q9JMA1, P56399, Q9JKB1, Q9DCH4, Q8K2H2, O08529, O70370, Q9WUP7, P35123, Q9WUU7, P70677, Q99K23, Q80U87, O89017, Q8CDG3, Q8R016, O89110 | 0.009653839463129    |
| <b>Annotation Cluster 67</b> Enrichment Score: 1.498910222000838  |                                                        |       |                   |                      |                                                                                                                                                        |                      |
| Category                                                          | Term                                                   | Count | %                 | PValue               | Genes                                                                                                                                                  | FDR                  |
| GOTERM_CC_DIRECT                                                  | GO:0005868~cytoplasmic dynein complex                  | 6     | 0.540540540540541 | 0.003656326083094    | P51807, Q9JHU4, P62627, Q91YJ2, O08788, Q8R1Q8                                                                                                         | 0.024723278752347    |
| UP_KEYWORDS                                                       | Dynein                                                 | 5     | 0.450450450450451 | 0.037935022603142    | P51807, Q9JHU4, P62627, O08788, Q8R1Q8                                                                                                                 | 0.093802964982314    |
| <b>Annotation Cluster 68</b> Enrichment Score: 1.4980844420165231 |                                                        |       |                   |                      |                                                                                                                                                        |                      |
| Category                                                          | Term                                                   | Count | %                 | PValue               | Genes                                                                                                                                                  | FDR                  |
| GOTERM_CC_DIRECT                                                  | GO:0030123~AP-3 adaptor complex                        | 5     | 0.450450450450451 | 0.001729050088609    | O54774, Q9Z1T1, Q920Q4, Q8R307, Q91W86                                                                                                                 | 0.013094672671069    |
| GOTERM_CC_DIRECT                                                  | GO:0033263~CORVET complex                              | 4     | 0.36036036036036  | 0.003082186090733    | Q920Q4, Q8R307, Q0P5W1, Q91W86                                                                                                                         | 0.021753509633876    |
| GOTERM_CC_DIRECT                                                  | GO:0030136~clathrin-coated vesicle                     | 8     | 0.720720720720721 | 0.019517787425873    | P42567, P98078, Q8VD75, Q68FD5, P22892, Q920Q4, Q8R307, Q91W86                                                                                         | 0.094587780037672    |
| GOTERM_CC_DIRECT                                                  | GO:0030897~HOPS complex                                | 4     | 0.36036036036036  | 0.02042009088115     | Q8BUK6, Q920Q4, Q8R307, Q91W86                                                                                                                         | 0.096655096837441    |
| <b>Annotation Cluster 69</b> Enrichment Score: 1.347430938343867  |                                                        |       |                   |                      |                                                                                                                                                        |                      |
| Category                                                          | Term                                                   | Count | %                 | PValue               | Genes                                                                                                                                                  | FDR                  |
| GOTERM_MF_DIRECT                                                  | GO:0008121~ubiquinol-cytochrome-c reductase activity   | 4     | 0.36036036036036  | 0.003979859556909    | Q9CR68, P99028, Q9D855, Q8R1I1                                                                                                                         | 0.07964664044084     |
| GOTERM_CC_DIRECT                                                  | GO:0005750~mitochondrial respiratory chain complex III | 4     | 0.36036036036036  | 0.009511449425718    | Q9CR68, P99028, Q9D855, Q8R1I1                                                                                                                         | 0.054078563885491    |
| UP_KEYWORDS                                                       | Respiratory chain                                      | 8     | 0.720720720720721 | 0.013934084511917    | Q91VD9, Q9CR68, P99028, Q9D855, Q9CQZ6, Q9CQH3, Q8R1I1, Q9CQ75                                                                                         | 0.042585067272374    |
| GOTERM_CC_DIRECT                                                  | GO:0070469~respiratory chain                           | 8     | 0.720720720720721 | 0.017899653652635    | Q91VD9, Q9CR68, P99028, Q9D855, Q9CQZ6, Q9CQH3, Q8R1I1, Q9CQ75                                                                                         | 0.089973480307049    |
| <b>Annotation Cluster 70</b> Enrichment Score: 1.3297000170879947 |                                                        |       |                   |                      |                                                                                                                                                        |                      |
| Category                                                          | Term                                                   | Count | %                 | PValue               | Genes                                                                                                                                                  | FDR                  |
| GOTERM_CC_DIRECT                                                  | GO:0042555~MCM complex                                 | 4     | 0.36036036036036  | 0.006895215930491    | P49718, P97310, P97311, Q8R3C0                                                                                                                         | 0.04125350189563     |
| <b>Annotation Cluster 71</b> Enrichment Score: 1.2602450157304304 |                                                        |       |                   |                      |                                                                                                                                                        |                      |
| Category                                                          | Term                                                   | Count | %                 | PValue               | Genes                                                                                                                                                  | FDR                  |
| UP_KEYWORDS                                                       | WD repeat                                              | 19    | 1.71171171171171  | 0.020671634644234    | O89053, Q9Z0H1, Q9WV32, Q7TMQ7, Q91WM3, Q7TNG5, Q9WUM4, Q8BX09, Q9D2V7, P58404, Q8CIE6, Q9CWU9, P27612, O88342, Q0P5W1, Q9WVA3, P61965, Q6ZQL4, Q9DAW6 | 0.057965820858058    |
| <b>Annotation Cluster 72</b> Enrichment Score: 1.2413105630164416 |                                                        |       |                   |                      |                                                                                                                                                        |                      |
| Category                                                          | Term                                                   | Count | %                 | PValue               | Genes                                                                                                                                                  | FDR                  |
| UP_KEYWORDS                                                       | Calmodulin-binding                                     | 14    | 1.26126126126126  | 0.0051989854324      | Q61879, Q62261, O08638, Q9JKF1, P70248, A2AN08, P58404, P48193, Q8VCN5, Q3UQ44, Q8VDD5, P63328, Q6URW6, P26645                                         | 0.017458321452009    |
| GOTERM_CC_DIRECT                                                  | GO:0097513~myosin II filament                          | 3     | 0.27027027027027  | 0.006329891187867    | Q8VDD5, Q61879, Q6URW6                                                                                                                                 | 0.03908019776857     |
| UP_KEYWORDS                                                       | Motor protein                                          | 12    | 1.08108108108108  | 0.017493596588581    | Q6P9P6, P28740, Q8VDD5, P51807, O88447, Q61879, Q6URW6, O08638, Q9JHU4, P62627, P70248, Q8R1Q8                                                         | 0.051126960201847    |
| UP_KEYWORDS                                                       | Cell shape                                             | 5     | 0.450450450450451 | 0.021187584576258    | Q8VDD5, Q7TMB8, P26040, Q61879, Q6URW6                                                                                                                 | 0.058806357191246    |

|                                                                   |                                                                 |       |                   |                   |                                                                                                                                                                                                                                                                                                                                                                                                                                                                                |                   |
|-------------------------------------------------------------------|-----------------------------------------------------------------|-------|-------------------|-------------------|--------------------------------------------------------------------------------------------------------------------------------------------------------------------------------------------------------------------------------------------------------------------------------------------------------------------------------------------------------------------------------------------------------------------------------------------------------------------------------|-------------------|
| <b>Annotation Cluster 73</b> Enrichment Score: 1.2401419545683408 |                                                                 |       |                   |                   |                                                                                                                                                                                                                                                                                                                                                                                                                                                                                |                   |
| Category                                                          | Term                                                            | Count | %                 | PValue            | Genes                                                                                                                                                                                                                                                                                                                                                                                                                                                                          | FDR               |
| GOTERM_CC_DIRECT                                                  | GO:0031105~septin complex                                       | 4     | 0.36036036036036  | 0.000945073641715 | O55131, Q9R1T4, P42208, Q80UG5                                                                                                                                                                                                                                                                                                                                                                                                                                                 | 0.008387528570219 |
| <b>Annotation Cluster 74</b> Enrichment Score: 1.2110416690147345 |                                                                 |       |                   |                   |                                                                                                                                                                                                                                                                                                                                                                                                                                                                                |                   |
| Category                                                          | Term                                                            | Count | %                 | PValue            | Genes                                                                                                                                                                                                                                                                                                                                                                                                                                                                          | FDR               |
| GOTERM_MF_DIRECT                                                  | GO:0004553~hydrolase activity, hydrolyzing O-glycosyl compounds | 8     | 0.720720720720721 | 0.002784896315863 | Q9D6Y9, P23780, Q9QWR8, P51569, Q8K2I4, Q91W89, P70699, P12265                                                                                                                                                                                                                                                                                                                                                                                                                 | 0.058631531417288 |
| UP_KEYWORDS                                                       | Glycosidase                                                     | 9     | 0.810810810810811 | 0.024544207637062 | P23780, P08905, Q9QWR8, P51569, Q8K2I4, P17439, Q91W89, P70699, P12265                                                                                                                                                                                                                                                                                                                                                                                                         | 0.064815771624086 |
| <b>Annotation Cluster 75</b> Enrichment Score: 1.139626837569982  |                                                                 |       |                   |                   |                                                                                                                                                                                                                                                                                                                                                                                                                                                                                |                   |
| Category                                                          | Term                                                            | Count | %                 | PValue            | Genes                                                                                                                                                                                                                                                                                                                                                                                                                                                                          | FDR               |
| SMART                                                             | SM00360:RRM                                                     | 20    | 1.8018018018018   | 0.006781117563507 | Q9CX86, Q8VE97, Q9Z204, P09405, Q8BL97, Q9CPN8, Q921F4, Q9JL18, Q99K48, Q6PFR5, Q9Z1D1, Q64012, Q8BGD9, Q61464, O35326, Q5SF07, O08583, O88569, Q8R4X3, Q6NV83                                                                                                                                                                                                                                                                                                                 | 0.102430565301397 |
| <b>Annotation Cluster 76</b> Enrichment Score: 1.1317616891423437 |                                                                 |       |                   |                   |                                                                                                                                                                                                                                                                                                                                                                                                                                                                                |                   |
| Category                                                          | Term                                                            | Count | %                 | PValue            | Genes                                                                                                                                                                                                                                                                                                                                                                                                                                                                          | FDR               |
| INTERPRO                                                          | IPR011990:Tetratricopeptide-like helical                        | 20    | 1.8018018018018   | 0.002373697362788 | Q9D2X5, Q99J14, Q9CYG7, O88447, Q80UM3, O88544, Q5SW19, Q9D706, P61202, Q9QY13, Q8QZY1, O89079                                                                                                                                                                                                                                                                                                                                                                                 | 0.0761309481447   |
| UP_KEYWORDS                                                       | TPR repeat                                                      | 12    | 1.08108108108108  | 0.037423370348772 | Q60864, Q8BSY0, Q9CYG7, O88447, O70145, Q80UM3, Q9CR16, Q99MD9, Q9D2X5, Q5SW19, Q9D706, Q9QY13                                                                                                                                                                                                                                                                                                                                                                                 | 0.093461074663301 |
| <b>Annotation Cluster 77</b> Enrichment Score: 1.0771279107332454 |                                                                 |       |                   |                   |                                                                                                                                                                                                                                                                                                                                                                                                                                                                                |                   |
| Category                                                          | Term                                                            | Count | %                 | PValue            | Genes                                                                                                                                                                                                                                                                                                                                                                                                                                                                          | FDR               |
| INTERPRO                                                          | IPR012675:Beta-grasp domain                                     | 6     | 0.540540540540541 | 0.000736888553314 | Q91VD9, Q3UQ84, Q9CZ30, G3X982, Q9D0R2, Q00519                                                                                                                                                                                                                                                                                                                                                                                                                                 | 0.031704180684066 |
| UP_KEYWORDS                                                       | Iron-sulfur                                                     | 7     | 0.630630630630631 | 0.040142010312359 | Q91VD9, Q9CR68, Q9DCB8, P28271, G3X982, Q9CQM9, Q00519                                                                                                                                                                                                                                                                                                                                                                                                                         | 0.098151618205237 |
| <b>Annotation Cluster 78</b> Enrichment Score: 1.0227578122344523 |                                                                 |       |                   |                   |                                                                                                                                                                                                                                                                                                                                                                                                                                                                                |                   |
| Category                                                          | Term                                                            | Count | %                 | PValue            | Genes                                                                                                                                                                                                                                                                                                                                                                                                                                                                          | FDR               |
| UP_KEYWORDS                                                       | Helicase                                                        | 14    | 1.26126126126126  | 0.00293034772609  | Q61655, Q91VR5, P97310, Q6NZQ2, P97311, O70133, Q9WTM5, Q62167, P54823, Q6NVF4, Q9JIK5, P49718, Q9EPU0, P23249                                                                                                                                                                                                                                                                                                                                                                 | 0.01091855591091  |
| <b>Annotation Cluster 79</b> Enrichment Score: 0.9778497170775678 |                                                                 |       |                   |                   |                                                                                                                                                                                                                                                                                                                                                                                                                                                                                |                   |
| Category                                                          | Term                                                            | Count | %                 | PValue            | Genes                                                                                                                                                                                                                                                                                                                                                                                                                                                                          | FDR               |
| UP_KEYWORDS                                                       | Motor protein                                                   | 12    | 1.08108108108108  | 0.017493596588581 | Q6P9P6, P28740, Q8VDD5, P51807, O88447, Q61879, Q6URW6, O08638, Q9JHU4, P62627, P70248, Q8R1Q8                                                                                                                                                                                                                                                                                                                                                                                 | 0.051126960201847 |
| <b>Annotation Cluster 80</b> Enrichment Score: 0.9443242832063248 |                                                                 |       |                   |                   |                                                                                                                                                                                                                                                                                                                                                                                                                                                                                |                   |
| Category                                                          | Term                                                            | Count | %                 | PValue            | Genes                                                                                                                                                                                                                                                                                                                                                                                                                                                                          | FDR               |
| UP_SEQ_FEATURE                                                    | active site:Proton acceptor                                     | 58    | 5.22522522522523  | 0.000526183051914 | Q8K1R7, Q62407, Q9JMH6, Q99L04, Q8BV14, Q62087, P11440, P68181, Q8JZN5, P12382, Q9D7B6, P63085, Q8BLN5, Q9JHR7, Q6P9R2, P05132, P49615, Q00519, Q9Z2A0, P54822, P18654, Q99MZ7, Q2TPA8, P05063, P05064, Q9D1A2, Q8K411, Q99JW2, O70551, Q2NL51, Q9EQ06, Q80X41, Q9CQ62, P31750, Q9CWJ9, Q3ULJ0, P47738, Q9JLT4, Q00612, Q03963, Q04899, Q9QVP9, O54988, P45952, P47857, Q91X52, P06801, Q9ESL4, P28352, Q58NB6, P14152, Q64261, Q9Z2G9, P17182, Q9WUA3, P28867, Q8CIN4, Q9JHW2 | 0.049461206879902 |
| GOTERM_BP_DIRECT                                                  | GO:0018107~peptidyl-threonine phosphorylation                   | 9     | 0.810810810810811 | 0.001065421197053 | B2RQC6, P63085, Q6P9R2, Q9Z2A0, P05132, P28867, P31750, P11440, P49615                                                                                                                                                                                                                                                                                                                                                                                                         | 0.056954799581534 |

|             |             |    |                  |                   |                                                                                                                                                                                                                                                                                                                                                                                                                                                                                                                                                                                                                                                                                                                                                        |                   |
|-------------|-------------|----|------------------|-------------------|--------------------------------------------------------------------------------------------------------------------------------------------------------------------------------------------------------------------------------------------------------------------------------------------------------------------------------------------------------------------------------------------------------------------------------------------------------------------------------------------------------------------------------------------------------------------------------------------------------------------------------------------------------------------------------------------------------------------------------------------------------|-------------------|
| UP_KEYWORDS | Transferase | 91 | 8.1981981981982  | 0.004771523339257 | Q91YR5, Q9CWQ0, Q61510, Q9D6Y9, Q8K1R7, B2RQC6, P19096, Q62407, Q9WTP7, Q8K1J6, Q9DBL7, O35130, Q9CS42, P11440, P68181, P12382, Q9JLV6, P63085, Q8BY71, Q3THS6, Q6P9R2, Q1HFZ0, Q9JKX6, P05132, P49615, P10649, Q9WV85, Q8CFV9, Q9DBC7, Q3TRM8, Q91YQ5, Q9JL16, O08759, Q9Z2A0, Q8BMF4, Q64674, Q9DBG6, P18654, Q09200, Q68FH4, Q8VHI3, Q8K183, O09131, Q91WU5, P23492, Q99K85, Q91YL3, O70551, Q2NL51, O70310, Q80X41, P11103, Q9R0N0, Q80WS3, Q99KQ4, Q3TW96, P31750, Q93092, Q91ZJ5, Q9CWJ9, P40142, Q91V92, Q8JZK9, Q03963, Q04899, Q9QVP9, Q80VA0, O54988, P04184, Q6ZQM8, P47856, P47857, Q8CFI2, Q9ESL4, Q7TSS2, A2BDX3, Q64737, P26450, Q922K7, P97930, Q61183, Q8BWU5, Q64261, Q04447, P08030, Q5DW34, Q8BH69, Q9WUA3, P28867, Q8CIN4, P05201 | 0.016428536054152 |
| UP_KEYWORDS | Kinase      | 42 | 3.78378378378378 | 0.018914653577931 | Q8K1R7, Q91YL3, O70551, Q2NL51, Q62407, Q80X41, Q9WTP7, Q9R0N0, Q9DBL7, P31750, Q9CS42, P11440, P68181, P12382, Q9JLV6, P63085, Q03963, Q04899, Q9QVP9, Q6P9R2, O54988, P04184, P05132, P47857, P49615, Q9WV85, Q8CFV9, Q9DBC7, Q9ESL4, Q3TRM8, P26450, P97930, Q9Z2A0, P18654, Q68FH4, Q64261, Q04447, Q8K183, Q8BH69, Q9WUA3, P28867, Q8CIN4                                                                                                                                                                                                                                                                                                                                                                                                         | 0.053591518470804 |

**Annotation Cluster 81** Enrichment Score: 0.928923891773362

| Category    | Term                | Count | %                 | PValue            | Genes                                                  | FDR               |
|-------------|---------------------|-------|-------------------|-------------------|--------------------------------------------------------|-------------------|
| UP_KEYWORDS | Pyridoxal phosphate | 7     | 0.630630630630631 | 0.037453151243749 | Q99K85, P19096, Q9JL16, Q9Z2Y8, Q99K01, Q8VCN5, P05201 | 0.093461074663301 |

**Annotation Cluster 82** Enrichment Score: 0.7269971565574219

| Category    | Term            | Count | %                | PValue            | Genes                                                                                                                                  | FDR               |
|-------------|-----------------|-------|------------------|-------------------|----------------------------------------------------------------------------------------------------------------------------------------|-------------------|
| UP_KEYWORDS | Innate immunity | 17    | 1.53153153153153 | 0.043681053747304 | Q18PI6, Q61510, Q9D8Y7, Q9D8T2, P56477, Q6R5N8, P10107, P14106, P97814, Q62167, A2AIV8, Q80V11, P16110, Q62192, Q03963, Q921X6, Q9EPB4 | 0.102424539821265 |

**Annotation Cluster 83** Enrichment Score: 0.6711910709442734

| Category    | Term          | Count | %               | PValue            | Genes                                                                                                                                                                                                                                                                                                                                                                                                                                                                                                                                                                                                                                                                                                          | FDR               |
|-------------|---------------|-------|-----------------|-------------------|----------------------------------------------------------------------------------------------------------------------------------------------------------------------------------------------------------------------------------------------------------------------------------------------------------------------------------------------------------------------------------------------------------------------------------------------------------------------------------------------------------------------------------------------------------------------------------------------------------------------------------------------------------------------------------------------------------------|-------------------|
| UP_KEYWORDS | Metal-binding | 166   | 14.954954954955 | 0.014459963770774 | Q6P069, Q61510, Q11136, P97386, B2RQC6, P10711, Q9D967, P56399, Q99KB8, Q9DCB8, Q9DBH5, Q8VE47, Q9CS42, Q9JHR7, Q9Z1F9, Q3THS6, Q3TIU4, Q9JKX6, P62715, P60898, Q00519, Q8CFV9, Q9WV85, P97310, Q64518, P46460, O70200, O08759, P35564, Q8CG72, Q9CQX2, Q8BGB7, Q9WVQ5, P46737, Q8BP48, P57780, Q99N69, Q6IRU2, Q91W89, Q91W86, Q8K411, Q99JW2, Q7TPR4, Q0P678, Q9CY64, O08529, O35593, P11103, Q9QXX4, P29391, Q62384, Q9CPU0, Q571E4, Q6PGG2, O54984, Q8K4Z3, Q0P5W1, Q9D819, Q9ESL4, Q8BSY0, P28352, A2BDX3, P28474, P24270, Q64737, Q61183, P51855, Q80W54, Q91VM9, Q9EQP2, Q8BMD8, P39749, Q61462, Q61464, P53996, Q91VD9, Q3TIV5, Q8CHP8, Q9CQM9, P24547, P17182, P62748, Q92111, Q9WUA3, P28867, Q8BGQ7 | 0.043701223840561 |
