# Supplementary material for: Does size matter? A proteomics-informed comparison of the effects of polystyrene beads of different sizes on macrophages
Source: Royal Society of Chemistry journal article supplement (doi:10.1039/d2en00214k), 2022-01-01
Supplement: d2en00214k6.pdf [file d2en00214k6.pdf]

Supplementary Table 12: list of mitochondrial proteins modulated in response to at least one size of polystyrene beads

| acc number | gene_name | description                                               | T test 10 µm | ratio 10µm/ctrl | T test 1 µm | Ratio 1 µm/ctrl | T test 0.1 µm | Ratio 0.1 µm/ctrl |
|------------|-----------|-----------------------------------------------------------|--------------|-----------------|-------------|-----------------|---------------|-------------------|
| Q9CQ62     | Decr1     | 2,4-dienoyl-CoA reductase, mitochondrial                  | 0.037996806  | 1.8938190913    | 0.179934717 | 1.49043262634   | 0.088307925   | 1.668740146       |
| Q80ZK0     | Mrps10    | 28S ribosomal protein S10, mitochondrial                  | 0.423927438  | 0.6706168752    | 0.105463371 | 1.43013039763   | 0.041608268   | 1.592797033       |
| Q9CQV5     | Mrps24    | 28S ribosomal protein S24, mitochondrial                  | 0.25283222   | 2.0819785431    | 0.060063091 | 2.22692435431   | 0.028338945   | 2.613732175       |
| Q924T2     | Mrps2     | 28S ribosomalProtein S2, mitochondrial                    | 0.002420457  | 1.7477248433    | 0.002368733 | 1.73320890387   | 0.000549841   | 1.95207922        |
| Q9CXW2     | Mrps22    | 28S ribosomalProtein S22, mitochondrial                   | 0.042268639  | 1.4128538107    | 0.330370704 | 1.15453144274   | 0.170767991   | 1.265931815       |
| Q8BK72     | Mrps27    | 28S ribosomalProtein S27, mitochondrial                   | 0.038443087  | 2.1565791319    | 0.605745038 | 0.75512394294   | 0.150703815   | 1.686918972       |
| Q9ER88     | Dap3      | 28S ribosomalProtein S29, mitochondrial                   | 0.045789578  | 1.5573642784    | 0.155623767 | 1.34788930543   | 0.0620855     | 1.555251151       |
| Q9D0G0     | Mrps30    | 28S ribosomalProtein S30, mitochondrial                   | 0.025440974  | 0.619522842     | 0.312203279 | 0.86628421451   | 0.122696348   | 0.744065016       |
| Q9JIK9     | Mrps34    | 28S ribosomalProtein S34, mitochondrial                   | 0.013072615  | 0.7493305351    | 0.02293887  | 0.74423047174   | 0.22485125    | 0.856086101       |
| Q9D338     | Mrp19     | 39S ribosomalProtein L19, mitochondrial                   | 0.00219165   | 0.6292871215    | 0.004729327 | 0.66682780939   | 0.037906451   | 0.804453807       |
| Q8JZN5     | Acad9     | Acyl-CoA dehydrogenase family member 9, mitochondrial     | 0.024475413  | 1.6973143777    | 0.098420123 | 1.44103754909   | 0.053715109   | 1.550547572       |
| Q8VCW8     | Acsf2     | Acyl-CoA synthetase family member 2, mitochondrial        | 0.006046733  | 2.5482481753    | 0.124701641 | 1.62668323531   | 0.166460697   | 1.548820471       |
| Q9CQR4     | Acot13    | Acyl-coenzyme A thioesterase 13                           | 0.006788904  | 2.4876739733    | 0.081921057 | 1.80799442197   | 0.032630885   | 2.004275149       |
| Q9QYR9     | Acot2     | Acyl-coenzyme A thioesterase 2, mitochondrial             | 0.024678544  | 1.6256369517    | 0.805633825 | 1.05389690308   | 0.583661375   | 1.123399298       |
| P47738     | Aldh2     | Aldehyde dehydrogenase, mitochondrial                     | 0.005044845  | 1.6112681598    | 0.432991643 | 1.10246719284   | 0.174032965   | 1.20249886        |
| Q8WTY4     | Ciapi1    | Anamorsin                                                 | 0.233808937  | 1.2558117148    | 0.014842673 | 1.65625376441   | 0.034633028   | 1.514180378       |
| Q07813     | Bax       | Apoptosis regulator BAX                                   | 0.007031953  | 1.5348236154    | 0.029687158 | 1.56337712074   | 0.010212547   | 1.475022101       |
| Q9EPB4     | Pycard    | Apoptosis-associated speck-like protein containing a CARD | 0.032329891  | 1.9833756387    | 0.006755712 | 2.52268986173   | 0.006089771   | 2.296095695       |
| Q9Z0X1     | Aifm1     | Apoptosis-inducing factor 1, mitochondrial                | 0.733344376  | 0.98421133      | 0.025607631 | 0.76414153243   | 0.003217593   | 0.757824565       |
| P56383     | Atp5mc2   | ATP synthase F(0) complex subunit C2, mitochondrial       | 0.024954717  | 0.034926454     | 0.026934792 | 0.05645732842   | 0.026763381   | 0.05713911        |
| Q03265     | Atp5fla   | ATP synthase subunit alpha, mitochondrial                 | 0.023085     | 0.7980233387    | 0.002970327 | 0.67760753227   | 0.018521615   | 0.803160514       |
| P56480     | Atp5flb   | ATP synthase subunit beta, mitochondrial                  | 0.188673347  | 0.8571859932    | 0.027651871 | 0.70452827943   | 0.247346716   | 0.872320069       |
| P35434     | Atp5fld   | ATP synthase subunit delta, mitochondrial                 | 0.568744931  | 0.9500419255    | 0.034330219 | 0.75619665072   | 0.245377094   | 0.886804356       |
| P56135     | Atp5mf    | ATP synthase subunit f, mitochondrial                     | 0.010001154  | 1.4243129109    | 0.351382535 | 0.89295002246   | 0.519620657   | 1.104767543       |
| Q9CPQ8     | Atp5mg    | ATP synthase subunit g, mitochondrial                     | 0.027678495  | 1.6275894948    | 0.233402949 | 0.77359642088   | 0.788955073   | 0.937831683       |
| Q91VR2     | Atp5flc   | ATP synthase subunit gamma, mitochondrial                 | 0.798804732  | 0.9768326861    | 0.026345314 | 0.73268693285   | 0.056082662   | 0.787727872       |
| Q9DB20     | Atp5po    | ATP synthase subunit O, mitochondrial                     | 0.10138699   | 0.8679802427    | 0.056146671 | 0.82046376758   | 0.250104214   | 0.892777445       |
| P61222     | Abce1     | ATP-binding cassette sub-family E member 1                | 0.034420298  | 1.6796236749    | 0.018558762 | 1.79291046947   | 0.027658183   | 1.724647439       |
| Q62167     | Ddx3x     | ATP-dependent RNA helicase DDX3X                          | 0.040328196  | 1.2528604416    | 0.009966678 | 1.35067253686   | 0.003286708   | 1.44947427        |
| Q9DBL7     | Coasy     | Bifunctional coenzyme A synthase                          | 0.002763225  | 1.9794125388    | 0.0046899   | 1.87399365335   | 0.011070715   | 1.717738715       |
| Q9QXX4     | Slc25a13  | Calcium-binding mitochondrial carrier Protein Aralar2     | 0.043940796  | 1.2555522938    | 0.189094551 | 0.84804838796   | 0.888372954   | 0.980611667       |
| Q8BMD8     | Slc25a24  | Calcium-binding mitochondrial carrier Protein SCaMC-1     | 0.000881937  | 1.5057130191    | 0.061072363 | 0.85083973989   | 0.876290331   | 1.011664618       |
| P05132     | Prkaca    | cAMP-dependentProtein kinase catalytic subunit alpha      | 0.000251254  | 3.0200346196    | 0.008125295 | 1.86260394782   | 0.00994378    | 1.862775392       |
| Q8K1J6     | Trnt1     | CCA tRNA nucleotidyltransferase 1, mitochondrial          | 0.00518717   | 3.60233976      | 0.103375082 | 2.31869549581   | 0.013892333   | 3.060591958       |
| Q9QYB1     | Clic4     | Chloride intracellular channelProtein 4                   | 0.015878901  | 1.996274908     | 0.003926836 | 2.08250765176   | 0.028210277   | 1.684618142       |
| P11440     | Cdk1      | Cyclin-dependent kinase 1                                 | 0.04942752   | 1.7635429596    | 0.009503702 | 2.1779797889    | 0.010741661   | 2.15261071        |
| Q9CZ13     | Uqcrc1    | Cytochrome b-c1 complex subunit 1, mitochondrial          | 0.447835602  | 0.9296434926    | 0.017042143 | 0.70847709567   | 0.268306362   | 0.893296596       |
| Q9DB77     | Uqcrc2    | Cytochrome b-c1 complex subunit 2, mitochondrial          | 0.133967019  | 0.8896124865    | 0.012510598 | 0.79083924304   | 0.149320274   | 0.897359254       |
| P99028     | Uqcrh     | Cytochrome b-c1 complex subunit 6, mitochondrial          | 0.009190644  | 0.5447673947    | 0.104847498 | 0.71129124647   | 0.053789848   | 0.668630459       |
| Q9D855     | Uqcrb     | Cytochrome b-c1 complex subunit 7                         | 0.019647933  | 3.2046702661    | 0.061411469 | 2.5708998101    | 0.139159656   | 2.484613553       |
| Q8R1I1     | Uqcr10    | Cytochrome b-c1 complex subunit 9                         | 0.039950452  | 1.7820629171    | 0.641526045 | 1.13718458862   | 0.362655415   | 1.278256484       |
| Q9CR68     | Uqcrfs1   | Cytochrome b-c1 complex subunit Rieske, mitochondrial     | 0.015072192  | 0.3901098829    | 0.406536672 | 0.85265099685   | 0.462833844   | 0.862186837       |
| Q9CQX2     | Cyb5b     | Cytochrome b5 type B                                      | 0.020754215  | 0.4710435079    | 0.005593297 | 0.69418288452   | 0.025961319   | 0.785780299       |
| Q9CPQ1     | Cox6c     | Cytochrome c Oxidase subunit 6C                           | 0.026995806  | 1.5195227055    | 0.176358145 | 1.16764419762   | 0.070428618   | 1.237634131       |

|        |            |                                                                                                          |             |              |             |               |             |             |
|--------|------------|----------------------------------------------------------------------------------------------------------|-------------|--------------|-------------|---------------|-------------|-------------|
| O35459 | Ech1       | Delta(3,5)-Delta(2,4)-dienoyl-CoA isomerase, mitochondrial                                               | 0.029297217 | 1.292783012  | 0.767908337 | 0.96269470147 | 0.954269992 | 0.991830024 |
| Q8BMF4 | Dlat       | Dihydrolipoyllysine-residue acetyltransferase component of Pyruvate dehydrogenase complex, mitochondrial | 0.007621045 | 1.2825158382 | 0.411804989 | 0.93920571994 | 0.300193133 | 1.077193271 |
| P28352 | Apex1      | DNA-(apurinic or apyrimidinic site) lyase                                                                | 0.029568964 | 1.3440345229 | 0.001001945 | 1.55098554843 | 0.003028426 | 1.442114093 |
| Q8BFR5 | Tufm       | Elongation factor Tu, mitochondrial                                                                      | 0.001329623 | 1.3303024865 | 0.19826598  | 1.0621711662  | 0.012602408 | 1.230423031 |
| P39749 | Fen1       | Flap endonuclease 1                                                                                      | 0.031655762 | 1.4105833674 | 0.001864117 | 1.79222631217 | 0.002784046 | 1.64896842  |
| Q9D172 | Gatd3a     | Glutamine amidotransferase-like class 1 domain-containing Protein 3A, mitochondrial                      | 0.016233377 | 2.4363094584 | 0.051499742 | 2.07492956529 | 0.012180791 | 2.570187868 |
| Q80Y14 | Glr5       | Glutaredoxin-related protein 5, mitochondrial                                                            | 0.131135124 | 1.7006540376 | 0.020847199 | 2.29301279512 | 0.030366018 | 2.171530936 |
| Q9CPV4 | Glod4      | Glyoxalase domain-containing protein 4                                                                   | 0.007792547 | 2.228022201  | 0.009119421 | 2.00870778303 | 0.026531828 | 1.771280628 |
| Q8BMP6 | Acbd3      | Golgi resident protein GCP60                                                                             | 0.007249255 | 3.0110473995 | 0.028977643 | 2.35181742354 | 0.03279109  | 2.269769334 |
| Q9CR59 | Gadd45gip1 | Growth arrest and DNA damage-inducible proteins-interacting protein 1                                    | 0.026259714 | 1.6405183863 | 0.201255423 | 1.21411191776 | 0.318915443 | 1.18436663  |
| Q9WTP7 | Ak3        | GTP:AMP Phosphotransferase AK3, mitochondrial                                                            | 0.000461337 | 3.1327651619 | 0.026915618 | 2.25021312116 | 0.003275185 | 2.48598356  |
| Q9CQN1 | Trap1      | Heat shock Protein 75 kDa, mitochondrial                                                                 | 0.005620086 | 1.508272063  | 0.170380804 | 1.18014319861 | 0.0253917   | 1.350182907 |
| Q99KB8 | Hagh       | Hydroxyacylglutathione hydrolase, mitochondrial                                                          | 0.001361628 | 2.7011185153 | 0.015629254 | 1.98663671597 | 0.139352873 | 1.605912779 |
| P97287 | Mcl1       | Induced myeloid leukemia cell differentiation protein Mcl-1 homolog                                      | 0.074144009 | 101715.2957  | 0.037634236 | 120461.585222 | 0.018317496 | 122658.1127 |
| Q91VM9 | Ppa2       | Inorganic Pyrophosphatase 2, mitochondrial                                                               | 0.049189844 | 1.7649814364 | 0.15636067  | 1.52614134363 | 0.170318721 | 1.499965498 |
| Q9DCB8 | Isca2      | Iron-sulfur cluster assembly 2 homolog, mitochondrial                                                    | 0.003543137 | 4.2519085356 | 0.170478148 | 2.30908930598 | 0.042020035 | 2.807446657 |
| Q9D7B6 | Acad8      | Isobutyryl-CoA dehydrogenase, mitochondrial                                                              | 0.044159119 | 2.1905153104 | 0.660504453 | 1.20918254832 | 0.444953405 | 1.351916271 |
| Q6PB66 | Lrpprc     | Leucine-rich PPR motif-containing Protein, mitochondrial                                                 | 0.002247329 | 1.9614375627 | 0.234233437 | 1.19730164909 | 0.091219084 | 1.347447184 |
| P51174 | Acadl      | Long-chain specific acyl-CoA dehydrogenase, mitochondrial                                                | 0.009047154 | 1.6812150188 | 0.728294293 | 0.9441370567  | 0.75118335  | 1.051431364 |
| P41216 | Acs11      | Long-chain-fatty-acid--CoA ligase 1                                                                      | 0.002246449 | 1.6510479783 | 0.041327541 | 1.2153058438  | 0.058856703 | 1.269030792 |
| Q9QUJ7 | Acs14      | Long-chain-fatty-acid--CoA ligase 4                                                                      | 0.007333325 | 1.6389586158 | 0.020117375 | 1.47813782593 | 0.031439977 | 1.422830082 |
| Q8BP40 | Acp6       | Lysophosphatidic acid phosphatase type 6                                                                 | 0.024653625 | 1.6433060578 | 0.146900504 | 1.22935707667 | 0.049994088 | 1.341226956 |
| P45952 | Acadm      | Medium-chain specific acyl-CoA dehydrogenase, mitochondrial                                              | 0.026345629 | 1.4404064363 | 0.987024366 | 1.00231741471 | 0.683058064 | 1.059130994 |
| Q7TNS2 | Minos1     | MICOS complex subunit Mic10                                                                              | 0.415517919 | 0.7081365176 | 0.346944006 | 0.65363196557 | 0.34045032  | 0.657629613 |
| Q8R404 | Mic13      | MICOS complex subunit MIC13                                                                              | 0.019783352 | 1.9633823045 | 0.162390912 | 1.45767219054 | 0.052753247 | 1.712323723 |
| Q9CRB9 | Chchd3     | MICOS complex subunit Mic19                                                                              | 0.024776527 | 0.7318297077 | 0.010330717 | 0.69387606855 | 0.019903583 | 0.746771043 |
| Q78IK4 | Apool      | MICOS complex subunit Mic27                                                                              | 0.065330098 | 1.2719488542 | 0.236685001 | 0.84035501398 | 0.714756059 | 1.037287834 |
| Q8CAQ8 | Immt       | MICOS complex subunit Mic60                                                                              | 0.321234413 | 0.902563614  | 0.01519396  | 0.68102017177 | 0.097045985 | 0.820905765 |
| Q922Q1 | Marc2      | Mitochondrial amidoxime reducing component 2                                                             | 0.044240544 | 0.69197073   | 0.069535635 | 0.72358184899 | 0.335863866 | 0.88079985  |
| P62075 | Timm13     | Mitochondrial import inner membrane translocase subunit Tim13                                            | 0.001166292 | 6.7754331073 | 0.002490357 | 5.31997605964 | 0.0070811   | 4.866585746 |
| Q9CYG7 | Tomm34     | Mitochondrial import receptor subunit TOM34                                                              | 0.009718201 | 1.7266001603 | 0.000573255 | 1.64963673889 | 0.004791242 | 1.615412301 |
| Q8BG51 | Rhot1      | Mitochondrial Rho GTPase 1                                                                               | 0.047316489 | 0.7547569435 | 0.443245356 | 0.92624312577 | 0.13871711  | 0.837911215 |
| Q9DC61 | Pmpca      | Mitochondrial-processing peptidase subunit alpha                                                         | 0.000778101 | 1.8869003106 | 0.06085217  | 1.31377080603 | 0.214012425 | 1.254175793 |
| Q8K4Z3 | Naxe       | NAD(P)H-hydrate epimerase                                                                                | 0.016076264 | 1.7556785978 | 0.367944716 | 1.20900447834 | 0.770940052 | 1.079474923 |
| Q99LC3 | Ndufa10    | NADH dehydrogenase [ubiquinone] 1 alpha subcomplex subunit 10, mitochondrial                             | 0.746368318 | 0.945818134  | 0.043389603 | 0.61648904395 | 0.184965724 | 0.783832475 |
| Q9ERS2 | Ndufa13    | NADH dehydrogenase [ubiquinone] 1 alpha subcomplex subunit 13                                            | 0.412443682 | 0.9293400826 | 0.008704062 | 0.77353866809 | 0.212548606 | 0.901440475 |
| Q9CQ75 | Ndufa2     | NADH dehydrogenase [ubiquinone] 1 alpha subcomplex subunit 2                                             | 6.42742E-05 | 0.5498612461 | 0.002463006 | 0.77002218748 | 0.022727327 | 0.857934213 |
| Q9DC69 | Ndufa9     | NADH dehydrogenase [ubiquinone] 1 alpha subcomplex subunit 9, mitochondrial                              | 0.247603209 | 0.7956285343 | 0.047064898 | 0.64375434346 | 0.147684477 | 0.777433463 |
| Q9CQZ6 | Ndufb3     | NADH dehydrogenase [ubiquinone] 1 beta subcomplex subunit 3                                              | 0.043157814 | 2.2448873917 | 0.291021515 | 1.53202750395 | 0.288954847 | 1.556114117 |
| Q9CQH3 | Ndufb5     | NADH dehydrogenase [ubiquinone] 1 beta subcomplex subunit 5, mitochondrial                               | 0.027470938 | 1.9903537435 | 0.13637992  | 1.52435516232 | 0.025961109 | 1.928429808 |
| Q91YT0 | Ndufv1     | NADH dehydrogenase [ubiquinone] flavoprotein 1, mitochondrial                                            | 0.307127712 | 0.8925893312 | 0.001106381 | 0.60066373361 | 0.013558624 | 0.755408764 |
| Q91WD5 | Ndufs2     | NADH dehydrogenase [ubiquinone] iron-sulfur protein 2, mitochondrial                                     | 0.597760856 | 0.886381871  | 0.033394809 | 0.53582118743 | 0.148537059 | 0.72931724  |

|        |         |                                                                    |             |              |             |               |             |             |
|--------|---------|--------------------------------------------------------------------|-------------|--------------|-------------|---------------|-------------|-------------|
| Q91VD9 | Ndufs1  | NADH-ubiquinoneOxidoreductase 75 kDa subunit, mitochondrial        | 0.018209279 | 0.8092941031 | 0.003845007 | 0.73289325872 | 0.04526031  | 0.846885175 |
| Q14C51 | Ptcd3   | Pentatricopeptide repeat domain-containingProtein 3, mitochondrial | 0.003958426 | 1.4945969749 | 0.206621619 | 1.17243369761 | 0.073255042 | 1.30335539  |
| P99029 | Prdx5   | Peroxiredoxin-5, mitochondrial                                     | 0.005761858 | 1.7761382679 | 0.000232065 | 2.03440323465 | 0.004212574 | 1.838908664 |
| O70325 | Gpx4    | Phospholipid hydroperoxide glutathione peroxidase                  | 0.000200748 | 2.7238283955 | 0.00622928  | 1.89466517273 | 0.018067532 | 1.845724761 |
| Q8CG72 | Adprhl2 | Poly(ADP-ribose) glycohydrolase ARH3                               | 0.000689374 | 5.5573858008 | 0.001373341 | 5.31537830518 | 0.230813919 | 2.705743941 |
| Q8K411 | Pitrm1  | Presequence Protease, mitochondrial                                | 0.034422278 | 2.0919122745 | 0.668904847 | 1.16519724835 | 0.307009178 | 1.413040636 |
| Q2YDW2 | Msto1   | Protein misato homolog 1                                           | 0.111001513 | 1.586498987  | 0.032088117 | 1.83811967286 | 0.039674029 | 1.786682636 |
| Q3T114 | Prrc1   | Protein PRRC1                                                      | 0.014715886 | 2.6117495748 | 0.048839314 | 2.15295751818 | 0.008426241 | 2.839726999 |
| Q8BK59 | Pum3    | Pumilio homolog 3                                                  | 0.575105673 | 1.182309158  | 0.847368681 | 0.9396071963  | 0.956419735 | 0.982296275 |
| Q9D051 | Pdhb    | Pyruvate dehydrogenase E1 component subunit beta, mitochondrial    | 0.020845397 | 1.2201172589 | 0.882946496 | 1.01270791365 | 0.240857918 | 1.133876633 |
| Q8BKZ9 | Pdhx    | Pyruvate dehydrogenase protein X component, mitochondrial          | 0.00514636  | 4.4590933456 | 9.26161E-05 | 3.68147038453 | 0.005607644 | 4.166178031 |
| Q9JIY5 | Htra2   | SerineProtease HTRA2, mitochondrial                                | 0.033741701 | 1.7334981175 | 0.342027438 | 1.27086120695 | 0.184028133 | 1.385995062 |
| Q9JMY0 | Stap1   | Signal-transducing adaptor protein 1                               | 0.00524383  | 1.3864461907 | 0.00650804  | 1.41043950125 | 0.094253226 | 1.178340564 |
| Q8BGH2 | Samm50  | Sorting and assembly machinery component 50 homolog                | 0.030999644 | 1.5025468595 | 0.119780178 | 0.68628552867 | 0.8580014   | 0.969157235 |
| Q9Z219 | Sucla2  | Succinate--CoA ligase [ADP-forming] subunit beta, mitochondrial    | 0.044423146 | 1.3780542599 | 0.76574301  | 1.04262752432 | 0.324410486 | 1.145459464 |
| Q62465 | Vat1    | Synaptic vesicle membrane protein VAT-1 homolog                    | 2.46935E-05 | 3.7232435991 | 0.001603215 | 1.9442840087  | 0.012161949 | 1.65079689  |
| Q9JLT4 | Txnrd2  | Thioredoxin reductase 2, mitochondrial                             | 0.001076552 | 2.6779265304 | 0.018589928 | 1.47283462043 | 0.024945142 | 1.431575687 |
| P20108 | Prdx3   | Thioredoxin-dependent peroxide reductase, mitochondrial            | 0.07939858  | 1.8411946581 | 0.024965301 | 1.76134613675 | 0.018176262 | 1.827315015 |
| Q3UQ84 | Tars2   | Threonine--tRNA ligase, mitochondrial                              | 0.042327559 | 1.9007317659 | 0.602850066 | 1.21373342228 | 0.187597975 | 1.503957235 |
| Q02053 | Uba1    | Ubiquitin-like modifier-activating enzyme 1                        | 0.002098679 | 2.0668209712 | 0.004907032 | 1.88356471608 | 0.02665266  | 1.600871245 |
| Q9JK81 | Myg1    | UPF0160 Protein MYG1, mitochondrial                                | 0.03072474  | 1.6790532718 | 0.016894531 | 1.79718193104 | 0.046460681 | 1.591147986 |
| Q3U5F4 | Yrdc    | YrdC domain-containing protein, mitochondrial                      | 0.196391959 | 54084.801448 | 0.000561428 | 168445.368166 | 0.020094628 | 126987.4061 |
| Q80Y81 | Elac2   | ZincPhosphodiesterase ELAC protein 2                               | 0.043720879 | 1.4310605061 | 0.085688726 | 1.34223248108 | 0.481444005 | 1.127717064 |
