# Supplementary material for: Does size matter? A proteomics-informed comparison of the effects of polystyrene beads of different sizes on macrophages
Source: Royal Society of Chemistry journal article supplement (doi:10.1039/d2en00214k), 2022-01-01
Supplement: d2en00214k7.pdf [file d2en00214k7.pdf]

Supplementary Table 13: list of lysosomal/endosomal proteins modulated in response to at least one size of polystyrene beads

| acc number | gene_name | description                                                    | T test 10 µm | ratio 10µm/ctrl | T test 1 µm | Ratio 1 µm/ctrl | T test 0.1 µm | Ratio 0.1 µm/ctrl |
|------------|-----------|----------------------------------------------------------------|--------------|-----------------|-------------|-----------------|---------------|-------------------|
| P20611     | Acp2      | Lysosomal acid phosphatase                                     | 0.065126515  | 2.29030888685   | 0.093175741 | 2.143064671755  | 0.043641786   | 2.476270316       |
| Q810B6     | Ankfy1    | Rabankyrin-5                                                   | 0.002541969  | 1.89030319472   | 0.01184922  | 1.722961512813  | 0.291590358   | 1.319396847       |
| O35643     | Ap1b1     | AP-1 complex subunit beta-1                                    | 0.006510749  | 1.59468981914   | 0.01216399  | 1.51999838609   | 0.007389884   | 1.573062883       |
| P22892     | Ap1g1     | AP-1 complex subunit gamma-1                                   | 0.007664374  | 1.73593006864   | 0.044614431 | 1.434536150926  | 0.20370654    | 1.265236145       |
| P61967     | Ap1s1     | AP-1 complex subunit sigma-1A                                  | 0.013788971  | 3.27431888501   | 0.794430754 | 1.212366373441  | 0.554221353   | 1.596712239       |
| P17426     | Ap2a1     | AP-2 complex subunit alpha-1                                   | 0.0003118    | 2.0940052681    | 0.000482709 | 1.739921273982  | 0.001965056   | 1.648471731       |
| P17427     | Ap2a2     | AP-2 complex subunit alpha-2                                   | 0.000863299  | 2.23079091433   | 0.004038456 | 1.89486185281   | 0.00525344    | 1.897214721       |
| P84091     | Ap2m1     | AP-2 complex subunit mu                                        | 0.019987409  | 1.65306408071   | 0.029855742 | 1.592494656659  | 0.029861913   | 1.586173198       |
| Q9Z1T1     | Ap3b1     | AP-3 complex subunit beta-1                                    | 0.000742449  | 3.66326900404   | 0.368543776 | 1.453064598857  | 0.431727181   | 1.361990874       |
| O54774     | Ap3d1     | AP-3 complex subunit delta-1                                   | 0.040577043  | 1.98563120911   | 0.784853711 | 1.098499613039  | 0.652992944   | 1.160442775       |
| P25286     | Atp6v0a1  | V-type proton ATPase 116 kDa subunit a isoform 1               | 0.579119105  | 1.16227924913   | 0.287712005 | 0.669214148613  | 0.407174964   | 0.744943917       |
| P63081     | Atp6v0c   | V-type proton ATPase 16 kDa proteolipid subunit                | 0.000348873  | 2.20209310684   | 0.683917028 | 1.080474400057  | 0.344478535   | 1.189574719       |
| P51863     | Atp6v0d1  | V-type proton ATPase subunit d 1                               | 0.017871128  | 1.91353314967   | 0.940435738 | 1.020088521328  | 0.66100522    | 1.120345618       |
| P50516     | Atp6v1a   | V-type proton ATPase catalytic subunit A                       | 2.74921E-05  | 2.22112073104   | 0.002941016 | 1.497096792143  | 0.006585363   | 1.426762814       |
| P62814     | Atp6v1b2  | V-type proton ATPase subunit B, brain isoform                  | 0.000390767  | 1.99419572805   | 0.014342574 | 1.422408822928  | 0.051436184   | 1.297267368       |
| Q9Z1G3     | Atp6v1c1  | V-type proton ATPase subunit C 1                               | 0.001006868  | 3.77436925162   | 0.000431255 | 2.474004221821  | 0.034926813   | 1.679908728       |
| P57746     | Atp6v1d   | V-type proton ATPase subunit D                                 | 0.288111252  | 1.41320025662   | 0.612899748 | 0.836165099226  | 0.319791359   | 1.220852224       |
| P50518     | Atp6v1e1  | V-type proton ATPase subunit E 1                               | 0.007311436  | 1.31380036343   | 0.008906918 | 1.327863868462  | 0.015487408   | 1.258137771       |
| P50408     | Atp6v1f   | V-type proton ATPase subunit F                                 | 0.74220144   | 0.89329402446   | 0.7219442   | 1.115783610399  | 0.717559952   | 0.883959642       |
| Q9CR51     | Atp6v1g1  | V-type proton ATPase subunit G 1                               | 0.034117051  | 1.36159698819   | 0.065550353 | 1.289834097357  | 0.517544312   | 1.088689997       |
| Q8BVE3     | Atp6v1h   | V-type proton ATPase subunit H                                 | 7.65318E-05  | 2.39097828336   | 0.034343166 | 1.379426233922  | 0.041467955   | 1.366607195       |
| O08539     | Bin1      | Myc box-dependent-interacting protein 1                        | 0.000597494  | 1.70426064202   | 0.011188703 | 1.526003938793  | 0.014678342   | 1.434624411       |
| Q8C1Y8     | Ccz1      | Vacuolar fusion protein CCZ1 homolog                           | 0.008816272  | 3.09008038516   | 0.923804671 | 1.065397185551  | 0.567531687   | 1.355957532       |
| P31996     | Cd68      | Macrosialin                                                    | 0.000274656  | 1.97812635343   | 0.281482401 | 0.926601282827  | 0.883105325   | 0.988598474       |
| Q68FD5     | Cltc      | Clathrin heavy chain 1                                         | 0.000596388  | 1.74239565937   | 0.004082209 | 1.42125780601   | 0.012076014   | 1.334471014       |
| P16675     | Ctsa      | Lysosomal protective protein                                   | 0.086966641  | 1.20167169362   | 0.627637683 | 0.953997205507  | 0.879732119   | 1.015053316       |
| P10605     | Ctsb      | Cathepsin B                                                    | 2.0479E-05   | 2.99719308321   | 0.030180293 | 1.486877712738  | 0.024118576   | 1.525920184       |
| P18242     | Ctsd      | Cathepsin D                                                    | 0.04931034   | 1.87718289386   | 0.119495897 | 1.30952496975   | 0.346470359   | 1.228750574       |
| O70370     | Ctss      | Cathepsin S                                                    | 0.035971663  | 1.45493379637   | 0.962936923 | 1.007121122479  | 0.812916356   | 1.039887613       |
| Q9WUU7     | Ctss      | Cathepsin Z                                                    | 0.01285856   | 1.46018618763   | 0.98503348  | 0.99876010985   | 0.940812078   | 1.006688199       |
| P98078     | Dab2      | Disabled homolog 2                                             | 0.028350073  | 1.51377899661   | 0.006034092 | 1.733817213422  | 0.013161501   | 1.620524025       |
| Q62418     | Dbn1      | Drebrin-like protein                                           | 0.016822239  | 1.3730029111    | 0.030405729 | 1.315330768046  | 0.047233999   | 1.309333036       |
| P42567     | Eps15     | Epidermal growth factor receptor substrate 15                  | 0.006728964  | 4.26915803691   | 0.00714596  | 4.287133706492  | 0.101625923   | 3.494206358       |
| Q60902     | Eps15l1   | Epidermal growth factor receptor substrate 15-like 1           | 0.011964747  | 7.58522996618   | 0.002973214 | 6.903673821     | 0.002173155   | 6.734794646       |
| Q80TY0     | Fnbp1     | Formin-binding protein 1                                       | 0.027398695  | 2.53916905737   | 0.000879199 | 2.741402689864  | 0.003683096   | 2.391143417       |
| P70699     | Gaa       | Lysosomal alpha-glucosidase                                    | 0.019825438  | 1.49557536058   | 0.376817999 | 1.146053908468  | 0.086293362   | 1.249014972       |
| P60517     | Gabarap   | Gamma-aminobutyric acid receptor-associated protein            | 0.025104241  | 1.84957362003   | 0.0339111   | 1.713024197106  | 0.024172008   | 1.81874297        |
| P60521     | Gabarapl2 | Gamma-aminobutyric acid receptor-associated protein-like 2     | 0.039213872  | 2.22170779284   | 0.046851111 | 2.140440149502  | 0.035808165   | 2.230807005       |
| Q571E4     | Galns     | N-acetylgalactosamine-6-sulfatase                              | 0.002785667  | 1.86000638016   | 0.895897936 | 0.973095279458  | 0.366754739   | 1.153034995       |
| Q6PAR5     | Gapvd1    | GTPase-activating protein and VPS9 domain-containing protein 1 | 0.01937989   | 3.31629416097   | 0.001021214 | 3.300958527711  | 0.03161005    | 2.352748704       |
| P17439     | Gba       | Glucosylceramidase                                             | 0.009275054  | 1.77693727827   | 0.212135106 | 1.253122877019  | 0.663527298   | 1.081977031       |
| Q8R0H9     | Gga1      | ADP-ribosylation factor-binding protein GGA1                   | 0.003659207  | 2.41912543607   | 0.002455645 | 2.517374348404  | 0.02078925    | 1.96944561        |
| P51569     | Gla       | Alpha-galactosidase A                                          | 1.31121E-05  | 3.79340335834   | 0.239263476 | 1.291353279158  | 0.551003701   | 1.162508576       |
| P23780     | Glb1      | Beta-galactosidase                                             | 0.002519196  | 1.60490304332   | 0.600128024 | 1.056707034087  | 0.321154531   | 1.124289212       |
| P12265     | Gusb      | Beta-glucuronidase                                             | 0.015380651  | 1.53805747331   | 0.753816899 | 1.048676737558  | 0.480815742   | 1.112268096       |
| Q8VD75     | Hip1      | Huntingtin-interacting protein 1                               | 0.030634688  | 4.19969695205   | 0.011189636 | 5.314495261654  | 0.032031055   | 4.138521799       |
| Q9Z0R6     | Itsn2     | Intersectin-2                                                  | 0.010331729  | 2.76783894481   | 0.027129076 | 2.398175464714  | 0.01983257    | 2.514512935       |
| P28740     | Kif2a     | Kinesin-like protein KIF2A                                     | 0.027613061  | 2.45429702774   | 0.020660238 | 2.907630251296  | 0.021544903   | 2.67771205        |
| P11438     | Lamp1     | Lysosome-associated membrane glycoprotein 1                    | 0.00514333   | 1.40065624447   | 0.733177627 | 0.982494563806  | 0.037052295   | 1.166319535       |

|        |         |                                                            |             |               |             |                |             |             |
|--------|---------|------------------------------------------------------------|-------------|---------------|-------------|----------------|-------------|-------------|
| P17047 | Lamp2   | Lysosome-associated membrane glycoprotein 2                | 0.004150407 | 1.77640184145 | 0.069907753 | 1.362344525428 | 0.046497444 | 1.47884357  |
| O89017 | Lgmn    | Legumain                                                   | 0.006001149 | 3.92173995119 | 0.079330929 | 2.429672593957 | 0.149691514 | 2.446600711 |
| Q9Z0M5 | Lipa    | Lysosomal acid lipase/cholesteryl ester hydrolase          | 0.001933708 | 3.26295785645 | 0.005096718 | 2.78353787979  | 0.000149562 | 4.731283722 |
| Q91ZX7 | Lrp1    | Prolow-density lipoprotein receptor-related protein 1      | 0.290483488 | 0.88110289845 | 0.027071981 | 0.681488531698 | 0.048532261 | 0.736777785 |
| Q8K214 | Manba   | Beta-mannosidase                                           | 0.003776555 | 3.89620192138 | 0.007216378 | 3.073403912253 | 0.021146373 | 2.586377762 |
| Q9QWR8 | Naga    | Alpha-N-acetylgalactosaminidase                            | 0.005093198 | 1.70618511919 | 0.560378773 | 1.102743889051 | 0.282504506 | 1.150791032 |
| Q9CR95 | Necap1  | Adaptin ear-binding coat-associated protein 1              | 0.030136291 | 1.96537292285 | 0.022231953 | 1.980349560095 | 0.042618388 | 1.824465749 |
| O35604 | Npc1    | NPC intracellular cholesterol transporter 1                | 0.000689372 | 2.86849963791 | 0.263304683 | 1.38385856417  | 0.376179331 | 1.284182027 |
| Q9Z0J0 | Npc2    | NPC intracellular cholesterol transporter 2                | 0.0019881   | 3.11056859659 | 0.689200998 | 1.240624012814 | 0.562034878 | 1.29760944  |
| Q3TCN2 | Plbd2   | Putative phospholipase B-like 2                            | 0.0210875   | 2.15194453355 | 0.464338771 | 1.285127124684 | 0.289698429 | 1.363710334 |
| O88531 | Ppt1    | Palmitoyl-protein thioesterase 1                           | 0.003488641 | 1.95683910104 | 0.031030686 | 1.523614312543 | 0.048857528 | 1.456761241 |
| Q61207 | Psap    | Prosaposin                                                 | 0.005779686 | 2.00173867068 | 0.470721248 | 1.100379686791 | 0.062400493 | 1.261998432 |
| P97814 | Pstpip1 | Proline-serine-threonine phosphatase-interacting protein 1 | 0.014045234 | 3.13393140812 | 0.00230981  | 2.84721269118  | 0.005351924 | 2.571277801 |
| Q5FVM3 | Retreg1 | Reticulophagy regulator 1                                  | 0.204801348 | 2.80094767396 | 0.029423836 | 3.242408324409 | 0.322696423 | 2.138767183 |
| Q8BIJ7 | Rufy1   | RUN and FYVE domain-containing protein 1                   | 0.040397724 | 1.74930179945 | 0.028635107 | 1.824815928873 | 0.142163533 | 1.490655152 |
| Q8BPX9 | Slc15a3 | Solute carrier family 15 member 3                          | 0.000590555 | 1.86638859678 | 0.190968861 | 0.912250689745 | 0.015523651 | 1.469393289 |
| Q9D8U8 | Snx5    | Sorting nexin-5                                            | 0.014575149 | 1.59527630472 | 0.08009922  | 1.33774640145  | 0.123458132 | 1.282212866 |
| O89023 | Tpp1    | Tripeptidyl-peptidase 1                                    | 0.000340301 | 2.38501796527 | 0.0071549   | 1.629711524153 | 0.012020987 | 1.5266068   |
| O70404 | Vamp8   | Vesicle-associated membrane protein 8                      | 0.024119457 | 1.38383685181 | 0.060976669 | 0.677819705145 | 0.544359693 | 0.90292919  |
| Q91W86 | Vps11   | Vacuolar protein sorting-associated protein 11 homolog     | 0.005154751 | 2.25663666227 | 0.102188202 | 1.620753233794 | 0.173294132 | 1.467347935 |
| Q920Q4 | Vps16   | Vacuolar protein sorting-associated protein 16 homolog     | 0.000928356 | 3.20800461879 | 0.066636899 | 2.0198435829   | 0.244449095 | 1.584127534 |
| Q8R307 | Vps18   | Vacuolar protein sorting-associated protein 18 homolog     | 0.005521915 | 2.3239502368  | 0.34335152  | 1.295572617127 | 0.250346134 | 1.370673393 |

m
