# Supplementary material for: Does size matter? A proteomics-informed comparison of the effects of polystyrene beads of different sizes on macrophages
Source: Royal Society of Chemistry journal article supplement (doi:10.1039/d2en00214k), 2022-01-01
Supplement: d2en00214k8.pdf [file d2en00214k8.pdf]

Supplementary Table 14: list of proteins linked to immune functions modulated in response to at least one size of polystyrene beads

| acc number | gene_name | description                                                            | T test 10 $\mu$ m | ratio 10 $\mu$ m/ctrl | T test 1 $\mu$ m | Ratio 1 $\mu$ m/ctrl | T test 0.1 $\mu$ m | Ratio 0.1 $\mu$ m/ctrl |
|------------|-----------|------------------------------------------------------------------------|-------------------|-----------------------|------------------|----------------------|--------------------|------------------------|
| P97449     | Anpep     | Aminopeptidase N (CD13)                                                | 1.91239E-05       | 6.876772415           | 0.629617641      | 0.647573681          | 0.154371624        | 0.217699926            |
| P10107     | Anxa1     | Annexin A1                                                             | 0.001002834       | 1.528699747           | 0.512004119      | 1.051545773          | 0.397983632        | 0.945424878            |
| Q9EPB4     | Pycard    | Apoptosis-associated speck-like protein containing a CARD              | 0.032329891       | 1.983375639           | 0.006755712      | 2.522689862          | 0.006089771        | 2.296095695            |
| Q62167     | Ddx3x     | ATP-dependent RNA helicase DDX3X                                       | 0.040328196       | 1.252860442           | 0.009966678      | 1.350672537          | 0.003286708        | 1.44947427             |
| A2AIV8     | Card9     | Caspase recruitment domain-containing protein 9                        | 0.001379414       | 6.822137579           | 0.000110031      | 7.03379854           | 0.004363748        | 4.912521754            |
| P29452     | Casp1     | Caspase-1                                                              | 0.001296324       | 2.201539307           | 0.00456577       | 1.975929712          | 0.013559604        | 1.73820356             |
| Q62192     | Cd180     | CD180 antigen                                                          | 0.000702312       | 3.620705113           | 0.008550975      | 2.57665573           | 0.009853708        | 2.540436445            |
| Q9JLQ0     | Cd2ap     | CD2-associated protein                                                 | 0.003665699       | 1.915501077           | 0.000910105      | 2.113649158          | 0.005225837        | 1.698911944            |
| P14106     | C1qb      | Complement C1q subcomponent subunit B                                  | 0.047209659       | 0.652621336           | 0.607307757      | 0.92260115           | 0.978000489        | 1.003729675            |
| Q921X6     | Polr3f    | DNA-directed RNA polymerase III subunit RPC6                           | 0.003637365       | 18.69713065           | 0.243499042      | 8.422442615          | 0.220591337        | 9.67947443             |
| Q80V11     | Trim56    | E3 ubiquitin-protein ligase TRIM56                                     | 0.042826997       | 2.941342749           | 0.011114659      | 3.63591993           | 0.073236311        | 2.522607317            |
| Q61510     | Trim25    | E3 ubiquitin/ISG15 ligase TRIM25                                       | 0.001749953       | 3.058083931           | 0.000287344      | 2.750313493          | 0.000509881        | 2.532866505            |
| Q8BPU7     | Elmo1     | Engulfment and cell motility protein 1                                 | 4.5421E-05        | 4.469032571           | 0.000499486      | 3.497496692          | 0.000255631        | 3.294607965            |
| Q8K1B8     | Fermt3    | Fermitin family homolog 3                                              | 0.000925041       | 1.586817231           | 0.001009073      | 1.580736085          | 0.002179855        | 1.485028103            |
| P16110     | Lgals3    | Galectin-3                                                             | 0.005679999       | 2.450410003           | 0.002795383      | 1.763232581          | 0.001835606        | 1.547134341            |
| Q9D8T2     | Gsdmdc1   | Gasdermin-D                                                            | 0.000151216       | 2.434267864           | 0.000138786      | 2.291592497          | 0.005209978        | 1.750831789            |
| P24063     | Itgal     | Integrin alpha-L (CD11a)                                               | 0.018296294       | 0.578454941           | 0.032731979      | 0.645078432          | 0.109326155        | 0.767122906            |
| P05555     | Itgam     | Integrin alpha-M (CD11b)                                               | 0.83776754        | 0.98196527            | 0.022424269      | 0.713332401          | 0.105971364        | 0.829083038            |
| P56477     | Irf5      | Interferon regulatory factor 5                                         | 0.002294709       | 2.779276888           | 0.000713567      | 3.239158432          | 0.001937721        | 2.778690271            |
| Q03963     | Eif2ak2   | Interferon-induced, double-stranded RNA-activated protein kinase       | 0.000542224       | 1.977933628           | 0.003391217      | 1.881132676          | 0.000275574        | 1.852538178            |
| Q99N69     | Lpxn      | Leupaxin                                                               | 0.000146681       | 2.973843077           | 0.007256739      | 2.334035244          | 0.001556614        | 2.31247393             |
| P31996     | Cd68      | Macrosialin                                                            | 0.000274656       | 1.978126353           | 0.281482401      | 0.926601283          | 0.883105325        | 0.988598474            |
| O35309     | Nmi       | N-myc-interactor                                                       | 0.042533351       | 1.703461635           | 0.002647066      | 2.083293812          | 0.005153308        | 1.981926593            |
| O70145     | Ncf2      | Neutrophil cytosol factor 2                                            | 0.006121144       | 1.826461078           | 0.002987767      | 1.949739065          | 0.004977818        | 1.84478308             |
| P97369     | Ncf4      | Neutrophil cytosol factor 4                                            | 0.004695355       | 1.294815545           | 0.02814651       | 1.270987235          | 0.012278336        | 1.241051812            |
| P97814     | Pstpip1   | Proline-serine-threonine phosphatase-interacting protein 1             | 0.014045234       | 3.133931408           | 0.00230981       | 2.847212691          | 0.005351924        | 2.571277801            |
| Q18P16     | Cd84      | SLAM family member 5                                                   | 0.047172182       | 2.237641124           | 0.814493971      | 1.067129795          | 0.320649952        | 0.612968141            |
| Q6R5N8     | Tlr13     | Toll-like receptor 13                                                  | 0.000108834       | 4.149321283           | 0.102534718      | 1.609274534          | 0.041197194        | 1.914494797            |
| P58681     | Tlr7      | Toll-like receptor 7                                                   | 0.136624355       | 2.026526903           | 0.329890969      | 1.578535731          | 0.042398179        | 2.610406782            |
| Q9D8Y7     | Tnfaip8l2 | Tumor necrosis factor alpha-induced protein 8-like protein 2           | 0.006922996       | 3.070611722           | 0.008004719      | 3.078086673          | 0.063407916        | 2.312875515            |
| P21855     | Cd72      | <i>B-cell differentiation antigen CD72</i>                             | 0.497830381       | 1.341184475           | 0.428258605      | 1.38482244           | 0.163769061        | 1.732342061            |
| P30993     | C5ar1     | <i>C5a anaphylatoxin chemotactic receptor 1 (CD88)</i>                 | 0.617687207       | 0.817927105           | 0.205022066      | 0.503991436          | 0.478948018        | 0.722662606            |
| Q61490     | Alcam     | <i>CD166 antigen</i>                                                   | 0.279199248       | 1.413293388           | 0.978747516      | 0.990792284          | 0.653595736        | 0.846763225            |
| P15379     | Cd44      | <i>CD44 antigen</i>                                                    | 0.498466134       | 1.09693769            | 0.769761814      | 0.96613995           | 0.776184786        | 0.965671659            |
| P35762     | Cd81      | <i>CD81 antigen</i>                                                    | 0.519180568       | 0.71698757            | 0.167923532      | 0.40919493           | 0.515302939        | 0.746434035            |
| P04441     | Cd74      | <i>H-2 class II histocompatibility antigen gamma chain</i>             | 0.122225222       | 0.649383948           | 0.066521526      | 0.553134317          | 0.616401797        | 0.894075947            |
| Q00651     | Itga4     | <i>Integrin alpha-4 (CD49d)</i>                                        | 0.804793724       | 0.909263589           | 0.831530356      | 0.926031123          | 0.779325979        | 0.897360642            |
| P11688     | Itga5     | <i>Integrin alpha-5 (CD49e)</i>                                        | 0.482946687       | 1.131567937           | 0.117872954      | 0.673476862          | 0.145393361        | 0.697389926            |
| Q61739     | Itga6     | <i>Integrin alpha-6 (CD49f)</i>                                        | 0.121014784       | 0.461231025           | 0.181604111      | 0.557639398          | 0.434913343        | 0.762175243            |
| P09055     | Itgb1     | <i>Integrin beta-1 (CD29)</i>                                          | 0.098908929       | 0.760103948           | 0.068311397      | 0.723582804          | 0.111993784        | 0.772542101            |
| P11835     | Itgb2     | <i>Integrin beta-2 (CD18)</i>                                          | 0.261487207       | 1.132357706           | 0.160134088      | 0.812269122          | 0.099005302        | 0.782981639            |
| P08101     | Fcgr2     | <i>Low affinity immunoglobulin gamma Fc region receptor II (CD32)</i>  | 0.266877615       | 1.345786632           | 0.506193524      | 0.805458637          | 0.489085034        | 0.796694654            |
| P08508     | Fcgr3     | <i>Low affinity immunoglobulin gamma Fc region receptor III (CD16)</i> | 0.212257755       | 1.40300817            | 0.604674489      | 0.848542487          | 0.587011973        | 0.840954471            |
| P09581     | Csflr     | <i>Macrophage colony-stimulating factor 1 receptor (CD115)</i>         | 0.496958268       | 0.854898433           | 0.23902769       | 0.734270651          | 0.828358478        | 0.956145898            |
| P30204     | Msr1      | <i>Macrophage scavenger receptor types I and II (CD204)</i>            | 0.85559991        | 0.961091742           | 0.260784998      | 0.780186081          | 0.635088636        | 0.906896417            |
| P10810     | Cd14      | <i>Monocyte differentiation antigen CD14</i>                           | 0.368029921       | 1.112970191           | 0.647430285      | 0.944190641          | 0.607211753        | 0.930552896            |
| Q9QUN7     | Tlr2      | <i>Toll-like receptor 2</i>                                            | 0.639723607       | 0.851377895           | 0.093532771      | 0.419516828          | 0.593847272        | 0.801213818            |
