# Supplementary material for: Does size matter? A proteomics-informed comparison of the effects of polystyrene beads of different sizes on macrophages
Source: Royal Society of Chemistry journal article supplement (doi:10.1039/d2en00214k), 2022-01-01
Supplement: d2en00214k9.pdf [file d2en00214k9.pdf]

Supplementary Table 2: list of proteins which abundance is significantly modified in response to cell exposure to 0.1 µm polystyrene particles

BH: false discovery rate according to Benjamini-Hochberg; SGoF: false discovery rate according to the sequential goodness of fit method; SFisher: false discovery rate according to the sequential Fisher method

| acc number | gene_name | description                                                                | protein_set_score | coverage | MW (Da) | #peptides | T test 0.1 µm | Ratio 0.1 µm/ctrl | B-H         | SGoF+ | SFisher | Q-value     |
|------------|-----------|----------------------------------------------------------------------------|-------------------|----------|---------|-----------|---------------|-------------------|-------------|-------|---------|-------------|
| P11103     | Parp1     | Poly [ADP-ribose] polymerase 1                                             | 976.93            | 25.77    | 113100  | 18        | 1.2592E-05    | 1.422205831       | 0.034858734 | 0     | 0       | 0.014104291 |
| Q8VDJ3     | Hdlbp     | Vigilin                                                                    | 1815.6            | 30.21    | 141743  | 31        | 5.1354E-05    | 1.514853456       | 0.034858734 | 0     | 0       | 0.014104291 |
| Q8BH61     | F13a1     | Coagulation factor XIII A chain                                            | 43.47             | 2.19     | 83207   | 1         | 9.5774E-05    | 10.58213555       | 0.034858734 | 0     | 0       | 0.014104291 |
| A0MZ67     | Shtn1     | Shootin-1                                                                  | 202.58            | 8.06     | 71446   | 4         | 0.00011686    | 2.543931415       | 0.034858734 | 0     | 0       | 0.014104291 |
| P62196     | Psmc5     | 26S proteasome regulatory subunit 8                                        | 759.97            | 40.39    | 45626   | 13        | 0.00012766    | 1.446230331       | 0.034858734 | 0     | 0       | 0.014104291 |
| P56399     | Usp5      | Ubiquitin carboxyl-terminal hydrolase 5                                    | 1049.75           | 30.42    | 95833   | 19        | 0.00013156    | 1.376775551       | 0.034858734 | 0     | 0       | 0.014104291 |
| Q91VR5     | Ddx1      | ATP-dependent RNA helicase DDX1                                            | 905.19            | 31.76    | 82500   | 16        | 0.00014368    | 1.822864849       | 0.034858734 | 0     | 0       | 0.014104291 |
| Q9Z0M5     | Lipa      | Lysosomal acid lipase/cholesteryl ester hydrolase                          | 105.58            | 4.79     | 45325   | 2         | 0.00014956    | 4.731283722       | 0.034858734 | 0     | 0       | 0.014104291 |
| Q6NZJ6     | Eif4g1    | Eukaryotic translation initiation factor 4 gamma 1                         | 1620.48           | 22.81    | 176077  | 29        | 0.00015127    | 1.748999602       | 0.034858734 | 0     | 0       | 0.014104291 |
| P04184     | Tk1       | Thymidine kinase, cytosolic                                                | 205.88            | 28.33    | 25776   | 5         | 0.00015182    | 1.80759823        | 0.034858734 | 0     | 0       | 0.014104291 |
| Q8BTM8     | Flna      | Filamin-A                                                                  | 4874.93           | 41.48    | 281222  | 76        | 0.00015826    | 1.719145858       | 0.034858734 | 0     | 0       | 0.014104291 |
| P62192     | Psmc1     | 26S proteasome regulatory subunit 4                                        | 390.91            | 17.05    | 49185   | 7         | 0.00016266    | 1.581846223       | 0.034858734 | 0     | 0       | 0.014104291 |
| P62334     | Psmc6     | 26S proteasome regulatory subunit 10B                                      | 593.05            | 30.85    | 44173   | 10        | 0.00016282    | 2.241310655       | 0.034858734 | 0     | 0       | 0.014104291 |
| Q5PPK9     | Eipr1     | EARP and GARP complex-interacting protein 1                                | 38.64             | 3.37     | 43157   | 1         | 0.00017467    | 19.51334278       | 0.034858734 | 0     | 0       | 0.014104291 |
| F1LMZ8     | Psmd11    | 26S proteasome non-ATPase regulatory subunit 11                            | 740.08            | 34.36    | 47464   | 14        | 0.00018652    | 1.811181126       | 0.034858734 | 0     | 0       | 0.014104291 |
| Q9QXS1     | Plec      | Plectin                                                                    | 7877.069          | 38.39    | 534188  | 147       | 0.00023562    | 1.418064064       | 0.034858734 | 0     | 0       | 0.014104291 |
| Q6A0A9     | FAM120A   | Constitutive coactivator of PPAR-gamma-like protein1                       | 371.15            | 9.71     | 121646  | 8         | 0.00024157    | 1.423592588       | 0.034858734 | 0     | 0       | 0.014104291 |
| Q71LX4     | Tln2      | Talin-2                                                                    | 594.96            | 3.75     | 253621  | 10        | 0.00024868    | 1.588188615       | 0.034858734 | 0     | 0       | 0.014104291 |
| Q8BPU7     | Elmo1     | Engulfment and cell motility protein 1                                     | 219.22            | 11.69    | 83936   | 6         | 0.00025563    | 3.294607965       | 0.034858734 | 0     | 0       | 0.014104291 |
| Q1HFZ0     | Nsun2     | tRNA (cytosine(34)-C(5))-methyltransferase                                 | 493               | 18.49    | 85452   | 10        | 0.00025872    | 2.161725995       | 0.034858734 | 0     | 0       | 0.014104291 |
| P26039     | Tln1      | Talin-1                                                                    | 6208.992          | 49.82    | 269821  | 91        | 0.00026858    | 1.502287501       | 0.034858734 | 0     | 0       | 0.014104291 |
| Q03963     | Eif2ak2   | Interferon-induced, double-stranded RNA-activated protein kinase           | 382.11            | 19.81    | 58280   | 6         | 0.00027557    | 1.852538178       | 0.034858734 | 0     | 0       | 0.014104291 |
| Q9EQP2     | Ehd4      | EH domain-containing protein 4                                             | 849.75            | 35.86    | 61481   | 17        | 0.00028082    | 1.912441099       | 0.034858734 | 0     | 0       | 0.014104291 |
| B2RQC6     | Cad       | CAD protein                                                                | 1068.65           | 13.98    | 243238  | 23        | 0.00032585    | 1.841212119       | 0.038209178 | 0     | 0       | 0.015459923 |
| Q91XD7     | Creld1    | Cysteine-rich with EGF-like domain protein 1                               | 54.31             | 2.62     | 45718   | 1         | 0.0003406     | 7.042567221       | 0.038209178 | 0     | 0       | 0.015459923 |
| O88958     | Gnpda1    | Glucosamine-6-phosphate isomerase 1                                        | 43.28             | 9.69     | 32549   | 1         | 0.00034796    | 71931.61652       | 0.038209178 | 0     | 0       | 0.015459923 |
| Q4G009     | Mcts1     | Malignant T-cell-amplified sequence 1                                      | 121.98            | 10.44    | 20550   | 1         | 0.00039476    | 10.36519779       | 0.041742531 | 0     | 0       | 0.016889563 |
| Q6P542     | Abcfl1    | ATP-binding cassette sub-family F member 1                                 | 418.04            | 13.62    | 94945   | 8         | 0.00041499    | 1.666137949       | 0.042313818 | 0     | 0       | 0.017120713 |
| Q9WU78     | Pdcd6ip   | Programmed cell death 6-interacting protein                                | 1129.38           | 31.07    | 96024   | 17        | 0.00045116    | 1.493100616       | 0.042448882 | 0     | 0       | 0.017175362 |
| Q99JX4     | Eif3m     | Eukaryotic translation initiation factor 3 subunit M                       | 513.85            | 28.61    | 42517   | 7         | 0.00046471    | 2.294242043       | 0.042448882 | 0     | 0       | 0.017175362 |
| Q4LDD4     | Arap1     | Arf-GAP with Rho-GAP domain, ANK repeat and PH domain-containing protein 1 | 44.15             | 0.96     | 162276  | 1         | 0.00046882    | 8.534149648       | 0.042448882 | 0     | 0       | 0.017175362 |
| Q641Z6     | Ehd1      | EH domain-containing protein 1                                             | 685.35            | 33.52    | 60603   | 13        | 0.00048001    | 2.001307076       | 0.042448882 | 0     | 0       | 0.017175362 |
| Q8R4X3     | Rbm12     | RNA-binding protein 12                                                     | 166.15            | 4.03     | 102796  | 4         | 0.00049065    | 3.566828275       | 0.042448882 | 0     | 0       | 0.017175362 |
| Q61510     | Trim25    | E3 ubiquitin/ISG15 ligase TRIM25                                           | 236.25            | 8.68     | 71726   | 4         | 0.00050988    | 2.532866505       | 0.042815044 | 0     | 0       | 0.017323516 |
| Q924T2     | Mrps2     | 28S ribosomal protein S2, mitochondrial                                    | 262.11            | 27.49    | 32313   | 5         | 0.00054984    | 1.95207922        | 0.044851307 | 0     | 0       | 0.018147414 |
| Q8R491     | Ehd3      | EH domain-containing protein 3                                             | 345.1             | 13.08    | 60791   | 7         | 0.00058548    | 2.153531606       | 0.046431622 | 0     | 0       | 0.01878683  |
| Q61749     | Eif2b4    | Translation initiation factor eIF-2B subunit delta                         | 211.27            | 9.92     | 57624   | 4         | 0.00066446    | 2.45929069        | 0.048673384 | 0     | 0       | 0.019693876 |
| P25444     | Rps2      | 40S ribosomal protein S2                                                   | 884.65            | 40.27    | 31231   | 15        | 0.0006921     | 1.496190731       | 0.048673384 | 0     | 0       | 0.019693876 |
| P32261     | Serpinc1  | Antithrombin-III                                                           | 231.23            | 7.1      | 52004   | 4         | 0.00069939    | 2.102992566       | 0.048673384 | 0     | 0       | 0.019693876 |
| Q8JZK9     | Hmgcs1    | Hydroxymethylglutaryl-CoA synthase, cytoplasmic                            | 388.81            | 21.54    | 57569   | 7         | 0.00070865    | 3.027030787       | 0.048673384 | 0     | 0       | 0.019693876 |
| Q80TE0     | Rpap1     | RNA polymerase II-associated protein 1                                     | 57.46             | 0.92     | 155270  | 1         | 0.00073177    | 7.944219625       | 0.048673384 | 0     | 0       | 0.019693876 |
| Q99LC8     | Eif2b1    | Translation initiation factor eIF-2B subunit alpha                         | 98.49             | 5.57     | 33816   | 1         | 0.00074616    | 3.937646242       | 0.048673384 | 0     | 0       | 0.019693876 |
| P54822     | Adsl      | Adenylosuccinate lyase                                                     | 755.65            | 37.4     | 54866   | 12        | 0.00074764    | 1.851851557       | 0.048673384 | 0     | 0       | 0.019693876 |
| Q8CFI2     | Cdc34     | Ubiquitin-conjugating enzyme E2 R1                                         | 34.63             | 2.98     | 26622   | 1         | 0.00075013    | 4.764926772       | 0.048673384 | 0     | 0       | 0.019693876 |
| P61982     | Ywhag     | 14-3-3 protein gamma                                                       | 778.16            | 50.2     | 28303   | 14        | 0.0007996     | 2.708172693       | 0.050615098 | 0     | 0       | 0.020479518 |
| Q61879     | Myh10     | Myosin-10                                                                  | 1022.24           | 10.12    | 228996  | 19        | 0.00083013    | 1.522674855       | 0.050615098 | 0     | 0       | 0.020479518 |
| Q5BJY6     | Amdhd2    | N-acetylglucosamine-6-phosphate deacetylase                                | 148.98            | 8.31     | 43539   | 3         | 0.00083324    | 1.719609791       | 0.050615098 | 0     | 0       | 0.020479518 |

|        |        |                                                                            |         |       |        |    |            |             |             |   |   |             |
|--------|--------|----------------------------------------------------------------------------|---------|-------|--------|----|------------|-------------|-------------|---|---|-------------|
| Q8CGF7 | Teerg1 | Transcription elongation regulator 1                                       | 350.65  | 7.18  | 123788 | 7  | 0.00087383 | 1.796817497 | 0.051974666 | 0 | 0 | 0.021029616 |
| P68254 | Ywhaq  | 14-3-3 protein theta                                                       | 757.04  | 44.08 | 27778  | 12 | 0.00095664 | 3.095829934 | 0.055339481 | 0 | 0 | 0.022391064 |
| Q9CQV8 | Ywhab  | 14-3-3 protein beta/alpha                                                  | 847.91  | 48.37 | 28086  | 13 | 0.00096917 | 2.952427639 | 0.055339481 | 0 | 0 | 0.022391064 |
| O70456 | Sfn    | 14-3-3 protein sigma                                                       | 158.96  | 12.1  | 27706  | 4  | 0.00101367 | 3.741910843 | 0.056745834 | 0 | 0 | 0.022960092 |
| P68510 | Ywhah  | 14-3-3 protein eta                                                         | 540.26  | 32.52 | 28212  | 10 | 0.00104642 | 3.300183229 | 0.057107643 | 0 | 0 | 0.023106485 |
| Q6AY79 | Hgh1   | Protein HGH1 homolog                                                       | 39.73   | 3.31  | 43132  | 1  | 0.00106014 | 5.290292709 | 0.057107643 | 0 | 0 | 0.023106485 |
| Q8BJY1 | Psmd5  | 26S proteasome non-ATPase regulatory subunit 5                             | 296.7   | 19.64 | 55972  | 7  | 0.00112156 | 2.600064665 | 0.059297277 | 0 | 0 | 0.023992439 |
| P62320 | Snrpd3 | Small nuclear ribonucleoprotein Sm D3                                      | 385.4   | 54.76 | 13916  | 7  | 0.00119248 | 0.709073564 | 0.061279765 | 0 | 0 | 0.024794579 |
| Q9CR16 | Ppid   | Peptidyl-prolyl cis-trans isomerase D                                      | 365.23  | 17.3  | 40743  | 6  | 0.00120198 | 2.331593479 | 0.061279765 | 0 | 0 | 0.024794579 |
| P63101 | Ywhaz  | 14-3-3 protein zeta/delta                                                  | 956.45  | 48.98 | 27771  | 14 | 0.00127445 | 2.33946406  | 0.061790541 | 0 | 0 | 0.025001245 |
| Q8R3C0 | Mcmbp  | Mini-chromosome maintenance complex-binding protein                        | 370.98  | 17.45 | 72891  | 7  | 0.00128187 | 2.113015572 | 0.061790541 | 0 | 0 | 0.025001245 |
| P46471 | Psmc2  | 26S proteasome regulatory subunit 7                                        | 958.45  | 38.11 | 48648  | 16 | 0.00128873 | 1.430525706 | 0.061790541 | 0 | 0 | 0.025001245 |
| P70168 | Kpnb1  | Importin subunit beta-1                                                    | 895.81  | 21.92 | 97184  | 16 | 0.0013189  | 1.381945139 | 0.061790541 | 0 | 0 | 0.025001245 |
| P35979 | Rpl12  | 60S ribosomal protein L12                                                  | 472.11  | 49.7  | 17805  | 6  | 0.00133828 | 1.539066078 | 0.061790541 | 0 | 0 | 0.025001245 |
| P52293 | Kpna2  | Importin subunit alpha-1                                                   | 1311.19 | 44.99 | 57928  | 19 | 0.00136242 | 1.471745591 | 0.061790541 | 0 | 0 | 0.025001245 |
| Q8VIJ5 | Oga    | Protein O-GlcNAcase                                                        | 77.43   | 2.18  | 102918 | 2  | 0.0013635  | 2.772569978 | 0.061790541 | 0 | 0 | 0.025001245 |
| Q9JKF1 | Iqgap1 | Ras GTPase-activating-like protein IQGAP1                                  | 4641.94 | 51.84 | 188742 | 74 | 0.0014195  | 1.428720673 | 0.062413701 | 0 | 0 | 0.025253384 |
| Q04899 | Cdk18  | Cyclin-dependent kinase 18                                                 | 160.51  | 8.87  | 51848  | 3  | 0.00146011 | 2.704482031 | 0.062413701 | 0 | 0 | 0.025253384 |
| P83953 | Kpna1  | Importin subunit alpha-5                                                   | 184.16  | 7.99  | 60137  | 3  | 0.00146883 | 2.594799049 | 0.062413701 | 0 | 0 | 0.025253384 |
| P61924 | Copz1  | Coatomer subunit zeta-1                                                    | 104.24  | 22.03 | 20198  | 3  | 0.00150165 | 2.923971235 | 0.062413701 | 0 | 0 | 0.025253384 |
| Q8VHI3 | Pofut2 | GDP-fucose protein O-fucosyltransferase 2                                  | 64.95   | 3.26  | 49429  | 1  | 0.00155143 | 93231.58652 | 0.062413701 | 0 | 0 | 0.025253384 |
| Q9JMA1 | Usp14  | Ubiquitin carboxyl-terminal hydrolase 14                                   | 1176.23 | 50.71 | 56002  | 20 | 0.00155215 | 1.784583438 | 0.062413701 | 0 | 0 | 0.025253384 |
| Q99N69 | Lpxn   | Leupaxin                                                                   | 263.87  | 17.88 | 43478  | 6  | 0.00155661 | 2.31247393  | 0.062413701 | 0 | 0 | 0.025253384 |
| Q2PQA9 | Kif5b  | Kinesin-1 heavy chain                                                      | 638.44  | 14.43 | 109531 | 10 | 0.00163541 | 2.081894835 | 0.062413701 | 0 | 0 | 0.025253384 |
| Q61074 | Ppm1g  | Protein phosphatase 1G                                                     | 272.87  | 11.25 | 58728  | 5  | 0.00164311 | 1.643377717 | 0.062413701 | 0 | 0 | 0.025253384 |
| Q04207 | Rela   | Transcription factor p65                                                   | 44.41   | 2.55  | 60212  | 1  | 0.00164795 | 1.755220127 | 0.062413701 | 0 | 0 | 0.025253384 |
| Q91W50 | Csde1  | Cold shock domain-containing protein E1                                    | 1036.8  | 29.82 | 88791  | 18 | 0.00165552 | 1.488164759 | 0.062413701 | 0 | 0 | 0.025253384 |
| P54823 | Ddx6   | Probable ATP-dependent RNA helicase DDX6                                   | 665.64  | 33.54 | 54192  | 11 | 0.00167014 | 1.763575273 | 0.062413701 | 0 | 0 | 0.025253384 |
| Q64152 | Btf3   | Transcription factor BTF3                                                  | 627.07  | 41.67 | 22031  | 9  | 0.00168054 | 1.745940549 | 0.062413701 | 0 | 0 | 0.025253384 |
| Q9QXB9 | Drg2   | Developmentally-regulated GTP-binding protein 2                            | 211.09  | 12.09 | 40718  | 4  | 0.0017335  | 2.041779697 | 0.062413701 | 0 | 0 | 0.025253384 |
| P28658 | Atxn10 | Ataxin-10                                                                  | 477.58  | 22.11 | 53707  | 8  | 0.00175152 | 2.469846472 | 0.062413701 | 0 | 0 | 0.025253384 |
| Q9Z255 | Ube2a  | Ubiquitin-conjugating enzyme E2 A                                          | 52.41   | 6.58  | 17315  | 1  | 0.00178822 | 4.193712913 | 0.062413701 | 0 | 0 | 0.025253384 |
| Q8BL66 | Eea1   | Early endosome antigen 1                                                   | 586.06  | 10.84 | 160915 | 12 | 0.00181134 | 1.637573273 | 0.062413701 | 0 | 0 | 0.025253384 |
| Q2NL51 | Gsk3a  | Glycogen synthase kinase-3 alpha                                           | 158.97  | 8.16  | 51661  | 3  | 0.00182346 | 5.922986165 | 0.062413701 | 0 | 0 | 0.025253384 |
| P16110 | Lgals3 | Galectin-3                                                                 | 686.86  | 35.23 | 27515  | 12 | 0.00183561 | 1.547134341 | 0.062413701 | 0 | 0 | 0.025253384 |
| Q61655 | Ddx19a | ATP-dependent RNA helicase DDX19A                                          | 562.17  | 30.54 | 53933  | 10 | 0.00183726 | 1.859192459 | 0.062413701 | 0 | 0 | 0.025253384 |
| Q8BH69 | Seph1  | Selenide, water dikinase 1                                                 | 178.57  | 14.03 | 42907  | 4  | 0.00191449 | 2.56096887  | 0.062413701 | 0 | 0 | 0.025253384 |
| Q69ZK0 | Prex1  | Phosphatidylinositol 3,4,5-trisphosphate-dependent Rac exchanger 1 protein | 571.72  | 11.03 | 184935 | 13 | 0.00191977 | 2.123023066 | 0.062413701 | 0 | 0 | 0.025253384 |
| P47856 | Gfpt1  | Glutamine--fructose-6-phosphate aminotransferase [isomerizing] 1           | 162.85  | 5.02  | 78539  | 3  | 0.00192644 | 3.925322241 | 0.062413701 | 0 | 0 | 0.025253384 |
| P56477 | Irf5   | Interferon regulatory factor 5                                             | 205.02  | 14.08 | 56005  | 4  | 0.00193772 | 2.778690271 | 0.062413701 | 0 | 0 | 0.025253384 |
| P17426 | Ap2a1  | AP-2 complex subunit alpha-1                                               | 767.87  | 23.64 | 107664 | 16 | 0.00196506 | 1.648471731 | 0.062413701 | 0 | 0 | 0.025253384 |
| Q9D7A6 | Srp19  | Signal recognition particle 19 kDa protein                                 | 132.76  | 18.06 | 16191  | 2  | 0.00197052 | 2.807798443 | 0.062413701 | 0 | 0 | 0.025253384 |
| Q64105 | Spr    | Sepiapterin reductase                                                      | 763.56  | 59.39 | 27883  | 12 | 0.00197497 | 1.846305122 | 0.062413701 | 0 | 0 | 0.025253384 |
| P97386 | Lig3   | DNA ligase 3                                                               | 45.7    | 0.99  | 113072 | 1  | 0.00198937 | 4.044985631 | 0.062413701 | 0 | 0 | 0.025253384 |
| Q9ESH6 | Glrx   | Glutaredoxin-1                                                             | 107.14  | 29.91 | 11879  | 3  | 0.0020557  | 1.948928295 | 0.063199493 | 0 | 0 | 0.025571325 |
| Q8BML9 | Qars   | Glutamine--tRNA ligase                                                     | 806.47  | 29.68 | 87677  | 18 | 0.00205869 | 1.577066459 | 0.063199493 | 0 | 0 | 0.025571325 |
| D3ZYR1 | Fcho2  | F-BAR domain only protein 2                                                | 49.33   | 2.97  | 88712  | 1  | 0.00209817 | 4.635448866 | 0.063242698 | 0 | 0 | 0.025588807 |
| Q61584 | Fxr1   | Fragile X mental retardation syndrome-related protein 1                    | 818.29  | 27.33 | 76222  | 14 | 0.00216319 | 1.34180864  | 0.063242698 | 0 | 0 | 0.025588807 |
| Q9WUP7 | Uchl5  | Ubiquitin carboxyl-terminal hydrolase isozyme L5                           | 663.04  | 37.99 | 37617  | 14 | 0.0021652  | 2.134822725 | 0.063242698 | 0 | 0 | 0.025588807 |

|        |          |                                                            |         |       |        |    |            |             |             |                |   |             |
|--------|----------|------------------------------------------------------------|---------|-------|--------|----|------------|-------------|-------------|----------------|---|-------------|
| Q60902 | Eps1511  | Epidermal growth factor receptor substrate 15-like 1       | 40.21   | 0.88  | 99309  | 1  | 0.00217316 | 6.734794646 | 0.063242698 | 0              | 0 | 0.025588807 |
| Q8K1B8 | Fermt3   | Fermitin family homolog 3                                  | 1259.78 | 48.27 | 75635  | 23 | 0.00217985 | 1.485028103 | 0.063242698 | 0              | 0 | 0.025588807 |
| P43274 | Hist1h1e | Histone H1.4                                               | 777.19  | 34.25 | 21977  | 12 | 0.00219742 | 0.49697065  | 0.063242698 | 0              | 0 | 0.025588807 |
| Q8VBW6 | Nae1     | NEDD8-activating enzyme E1 regulatory subunit              | 117.42  | 4.68  | 60274  | 2  | 0.00222686 | 2.995960934 | 0.063242698 | 0              | 0 | 0.025588807 |
| Q9Z1Q9 | Vars     | Valine--tRNA ligase                                        | 2117.74 | 37.53 | 140215 | 37 | 0.00224167 | 1.633089939 | 0.063242698 | 0              | 0 | 0.025588807 |
| Q61704 | Itih3    | Inter-alpha-trypsin inhibitor heavy chain H3               | 125.95  | 2.47  | 99358  | 3  | 0.00225946 | 1.830728194 | 0.063242698 | 0              | 0 | 0.025588807 |
| Q6P7P5 | Bzw1     | Basic leucine zipper and W2 domain-containing protein 1    | 165.36  | 12.65 | 48043  | 4  | 0.00230371 | 2.52230883  | 0.063855401 | 0              | 0 | 0.025836714 |
| Q9CZD3 | Gars     | Glycine--tRNA ligase                                       | 1137.19 | 32.92 | 81878  | 21 | 0.00235426 | 1.766836302 | 0.064457485 | 0              | 0 | 0.026080325 |
| Q8CG48 | Smc2     | Structural maintenance of chromosomes protein 2            | 717.19  | 15.03 | 134239 | 14 | 0.00237216 | 1.792148736 | 0.064457485 | 0              | 0 | 0.026080325 |
| Q8BGQ7 | Aars     | Alanine--tRNA ligase, cytoplasmic                          | 1526.94 | 40.19 | 106909 | 26 | 0.00241573 | 1.73975233  | 0.064457485 | 0              | 0 | 0.026080325 |
| B0BN93 | Psmd13   | 26S proteasome non-ATPase regulatory subunit 13            | 355.53  | 21.01 | 42817  | 8  | 0.00241574 | 2.560159645 | 0.064457485 | 0              | 0 | 0.026080325 |
| Q8BMJ2 | Lars     | Leucine--tRNA ligase, cytoplasmic                          | 1136.64 | 23.6  | 134192 | 22 | 0.00246804 | 1.878043129 | 0.06524317  | 0              | 0 | 0.026398223 |
| P19096 | Fasn     | Fatty acid synthase                                        | 3753.07 | 37.9  | 272428 | 67 | 0.00250859 | 1.669027125 | 0.065706559 | 0              | 0 | 0.026585717 |
| Q8BMJ3 | Eif1ax   | Eukaryotic translation initiation factor 1A, X-chromosomal | 257.75  | 36.81 | 16460  | 5  | 0.00256936 | 1.879032645 | 0.06668645  | 4.9406565e-324 | 0 | 0.026982193 |
| Q9QY13 | Dnajc7   | DnaJ homolog subfamily C member 7                          | 224.76  | 8.1   | 56476  | 3  | 0.00267067 | 2.176428481 | 0.068581639 | 1.4821969e-323 | 0 | 0.027749011 |
| P83940 | Eloc     | Elongin-C                                                  | 257.95  | 37.5  | 12473  | 3  | 0.00269042 | 2.28927281  | 0.068581639 | 6.916919e-323  | 0 | 0.027749011 |
| P39749 | Fen1     | Flap endonuclease 1                                        | 554.75  | 21.43 | 42315  | 9  | 0.00278405 | 1.64896842  | 0.06990517  | 3.1126136e-322 | 0 | 0.028284528 |
| P97371 | Psmc1    | Proteasome activator complex subunit 1                     | 295.29  | 24.9  | 28673  | 5  | 0.00279131 | 3.025891846 | 0.06990517  | 1.3537399e-321 | 0 | 0.028284528 |
| Q3THK7 | Gmps     | GMP synthase [glutamine-hydrolyzing]                       | 1087.14 | 43.43 | 76723  | 20 | 0.00285947 | 1.972658164 | 0.070561106 | 5.8843218e-321 | 0 | 0.028549928 |
| Q6P5F9 | Xpo1     | Exportin-1                                                 | 608.3   | 12.23 | 123093 | 10 | 0.00286693 | 1.71160778  | 0.070561106 | 2.5528372e-320 | 0 | 0.028549928 |
| P60229 | Eif3e    | Eukaryotic translation initiation factor 3 subunit E       | 372.73  | 20.9  | 52221  | 8  | 0.00297193 | 2.133176962 | 0.070904714 | 1.1057683e-319 | 0 | 0.028688957 |
| Q99PP7 | Trim33   | E3 ubiquitin-protein ligase TRIM33                         | 108.42  | 2.1   | 123843 | 2  | 0.00299817 | 2.826132131 | 0.070904714 | 4.7825555e-319 | 0 | 0.028688957 |
| Q5SUR0 | Pfas     | Phosphoribosylformylglycinamide synthase                   | 1007.33 | 19.67 | 144629 | 19 | 0.00302342 | 1.794703467 | 0.070904714 | 2.0655995e-318 | 0 | 0.028688957 |
| P28352 | Apex1    | DNA-(apurinic or apyrimidinic site) lyase                  | 455.02  | 35.33 | 35490  | 7  | 0.00302843 | 1.442114093 | 0.070904714 | 8.9088188e-318 | 0 | 0.028688957 |
| P50399 | Gdi2     | Rab GDP dissociation inhibitor beta                        | 1995.58 | 69.89 | 50537  | 34 | 0.00305523 | 1.805024011 | 0.070904714 | 3.836894e-317  | 0 | 0.028688957 |
| Q9WV03 | Fam50a   | Protein FAM50A                                             | 137.26  | 12.68 | 40252  | 3  | 0.0030894  | 1.919250302 | 0.070904714 | 1.6501578e-316 | 0 | 0.028688957 |
| Q9CQ17 | Snrpb2   | U2 small nuclear ribonucleoprotein B"                      | 332.89  | 31.11 | 25323  | 8  | 0.00308954 | 0.778381639 | 0.070904714 | 7.0869162e-316 | 0 | 0.028688957 |
| P53996 | Cnbp     | Cellular nucleic acid-binding protein                      | 330.92  | 43.26 | 19592  | 6  | 0.00319163 | 1.78562024  | 0.070904714 | 3.0393125e-315 | 0 | 0.028688957 |
| Q9CZY3 | Ube2v1   | Ubiquitin-conjugating enzyme E2 variant 1                  | 398.85  | 36.05 | 16355  | 7  | 0.00319165 | 1.692864128 | 0.070904714 | 1.3016065e-314 | 0 | 0.028688957 |
| P37913 | Lig1     | DNA ligase 1                                               | 619.96  | 14.41 | 102290 | 11 | 0.0032039  | 1.733957715 | 0.070904714 | 5.5663496e-314 | 0 | 0.028688957 |
| Q9Z0X1 | Aifm1    | Apoptosis-inducing factor 1, mitochondrial                 | 728.87  | 28.92 | 66765  | 12 | 0.00321759 | 0.757824565 | 0.070904714 | 2.3771015e-313 | 0 | 0.028688957 |
| Q9WTP7 | Ak3      | GTP:AMP phosphotransferase AK3, mitochondrial              | 259.55  | 31.72 | 25426  | 4  | 0.00327518 | 2.48598356  | 0.070904714 | 1.0137049e-312 | 0 | 0.028688957 |
| Q3TW96 | Uap111   | UDP-N-acetylhexosamine pyrophosphorylase-like protein 1    | 706.45  | 30.37 | 56614  | 12 | 0.00327931 | 1.909778754 | 0.070904714 | 4.3168008e-312 | 0 | 0.028688957 |
| P61750 | Arf4     | ADP-ribosylation factor 4                                  | 645.19  | 47.22 | 20397  | 9  | 0.00328631 | 1.945807601 | 0.070904714 | 1.8356894e-311 | 0 | 0.028688957 |
| Q62167 | Ddx3x    | ATP-dependent RNA helicase DDX3X                           | 1692.59 | 47.58 | 73101  | 27 | 0.00328671 | 1.44947427  | 0.070904714 | 7.7951274e-311 | 0 | 0.028688957 |
| A2AAY5 | Sh3pxd2b | SH3 and PX domain-containing protein 2B                    | 186.02  | 4.74  | 101517 | 5  | 0.00330858 | 1.986079352 | 0.070904714 | 3.3054769e-310 | 0 | 0.028688957 |
| Q5XI32 | Capzb    | F-actin-capping protein subunit beta                       | 1198.29 | 56.62 | 30629  | 19 | 0.00331679 | 1.498820332 | 0.070904714 | 1.3996905e-309 | 0 | 0.028688957 |
| Q6AYH5 | Dctn2    | Dynactin subunit 2                                         | 166.19  | 8.21  | 44148  | 3  | 0.00332793 | 3.288019461 | 0.070904714 | 5.9185721e-309 | 0 | 0.028688957 |
| P61290 | Psmc3    | Proteasome activator complex subunit 3                     | 520.16  | 29.13 | 29506  | 9  | 0.00337223 | 2.394517112 | 0.071252415 | 2.499131e-308  | 0 | 0.028829641 |
| B0BNE2 | Polr2e   | DNA-directed RNA polymerases I, II, and III subunit RPABC1 | 117.41  | 11.43 | 24570  | 2  | 0.00339416 | 0.675642696 | 0.071252415 | 1.053776e-307  | 0 | 0.028829641 |
| Q3TC93 | Hs1bp3   | HCLS1-binding protein 3                                    | 64.99   | 7.09  | 43691  | 2  | 0.0034517  | 3.012630509 | 0.071702807 | 4.4370558e-307 | 0 | 0.029011875 |
| Q99KC8 | Vwa5a    | von Willebrand factor A domain-containing protein 5A       | 1687.11 | 45.4  | 87143  | 28 | 0.00348216 | 1.387514296 | 0.071702807 | 1.8656443e-306 | 0 | 0.029011875 |
| P13439 | Umps     | Uridine 5'-monophosphate synthase                          | 452.35  | 24.32 | 52292  | 9  | 0.00349096 | 1.929571256 | 0.071702807 | 7.8333987e-306 | 0 | 0.029011875 |
| P45377 | Akr1b8   | Aldose reductase-related protein 2                         | 863.46  | 55.7  | 36121  | 15 | 0.00353853 | 1.396482536 | 0.072160658 | 3.2844235e-305 | 0 | 0.029197128 |
| Q2L4X1 | Bzw2     | Basic leucine zipper and W2 domain-containing protein 2    | 136.41  | 8.83  | 48063  | 3  | 0.0035787  | 1.751593079 | 0.072212976 | 1.3751677e-304 | 0 | 0.029218296 |
| Q7TSC1 | Prrc2a   | Protein PRRC2A                                             | 65.12   | 0.97  | 229203 | 1  | 0.00359168 | 6.762634702 | 0.072212976 | 5.7496295e-304 | 0 | 0.029218296 |
| P29391 | Ftl1     | Ferritin light chain 1                                     | 538.2   | 49.18 | 20802  | 9  | 0.00364122 | 1.654000895 | 0.07251889  | 2.4005558e-303 | 0 | 0.029342073 |



|        |          |                                                                       |          |       |        |     |            |             |             |                |   |             |
|--------|----------|-----------------------------------------------------------------------|----------|-------|--------|-----|------------|-------------|-------------|----------------|---|-------------|
| P27546 | Map4     | Microtubule-associated protein 4                                      | 602.92   | 22.04 | 117429 | 15  | 0.00367401 | 1.485603765 | 0.07251889  | 1.0008559e-302 | 0 | 0.029342073 |
| Q80TY0 | Fnbp1    | Formin-binding protein 1                                              | 434.16   | 17.05 | 71344  | 8   | 0.0036831  | 2.391143417 | 0.07251889  | 4.1669589e-302 | 0 | 0.029342073 |
| Q3UZ39 | Lrrfp1   | Leucine-rich repeat flightless-interacting protein 1                  | 647.42   | 24.69 | 79249  | 12  | 0.00371449 | 1.560058625 | 0.072636106 | 1.7324266e-301 | 0 | 0.0293895   |
| P63028 | Tpt1     | Translationally-controlled tumor protein                              | 252.57   | 44.19 | 19462  | 4   | 0.00375839 | 2.831656902 | 0.072994502 | 7.1924775e-301 | 0 | 0.029534512 |
| Q9D2M8 | Ube2v2   | Ubiquitin-conjugating enzyme E2 variant 2                             | 408.32   | 41.38 | 16367  | 8   | 0.00380215 | 1.796173154 | 0.073345528 | 2.9818808e-300 | 0 | 0.029676541 |
| Q9D819 | Ppa1     | Inorganic pyrophosphatase                                             | 241.96   | 17.3  | 32667  | 5   | 0.00385301 | 2.588435946 | 0.073600536 | 1.2344976e-299 | 0 | 0.029779721 |
| Q60865 | Caprin1  | Caprin-1                                                              | 810.19   | 24.89 | 78169  | 14  | 0.00388513 | 1.983765264 | 0.073600536 | 5.1036214e-299 | 0 | 0.029779721 |
| P23591 | Tsta3    | GDP-L-fucose synthase                                                 | 206.47   | 14.02 | 35878  | 4   | 0.00389952 | 3.070631781 | 0.073600536 | 2.1069536e-298 | 0 | 0.029779721 |
| P62994 | Grb2     | Growth factor receptor-bound protein 2                                | 92.77    | 11.06 | 25206  | 2   | 0.00396486 | 3.071235158 | 0.073600536 | 8.6860014e-298 | 0 | 0.029779721 |
| Q8K298 | Anln     | Anillin                                                               | 413.93   | 10.17 | 122794 | 7   | 0.00397209 | 1.99343935  | 0.073600536 | 3.5758004e-297 | 0 | 0.029779721 |
| Q93092 | Taldo1   | Transaldolase                                                         | 1283.64  | 52.82 | 37387  | 25  | 0.00398066 | 1.64866512  | 0.073600536 | 1.4699927e-296 | 0 | 0.029779721 |
| Q4V8K5 | Brox     | BRO1 domain-containing protein BROX                                   | 163.76   | 9.25  | 46192  | 3   | 0.00402968 | 3.716133202 | 0.073600536 | 6.0345608e-296 | 0 | 0.029779721 |
| Q8BYW1 | Arhgap25 | Rho GTPase-activating protein 25                                      | 332.92   | 13.12 | 73383  | 6   | 0.00404223 | 2.258308298 | 0.073600536 | 2.4738013e-295 | 0 | 0.029779721 |
| P02802 | Mt1      | Metallothionein-1                                                     | 108.88   | 55.74 | 6018   | 2   | 0.00404738 | 2.329337983 | 0.073600536 | 1.0126811e-294 | 0 | 0.029779721 |
| Q9CPU0 | Glo1     | Lactoylglutathione lyase                                              | 326.04   | 51.63 | 20810  | 7   | 0.00411012 | 2.694480165 | 0.074072823 | 4.1397047e-294 | 0 | 0.029970814 |
| Q9JHU4 | Dync1h1  | Cytoplasmic dynein 1 heavy chain 1                                    | 4449.2   | 23.32 | 532045 | 86  | 0.0041993  | 1.541452051 | 0.074072823 | 1.6898762e-293 | 0 | 0.029970814 |
| P99029 | Prdx5    | Peroxiredoxin-5, mitochondrial                                        | 730.88   | 57.14 | 21897  | 12  | 0.00421257 | 1.838908664 | 0.074072823 | 6.888574e-293  | 0 | 0.029970814 |
| P10711 | Tcea1    | Transcription elongation factor A protein 1                           | 529.83   | 39.87 | 33880  | 9   | 0.00423073 | 2.125133974 | 0.074072823 | 2.8040952e-292 | 0 | 0.029970814 |
| P35123 | Usp4     | Ubiquitin carboxyl-terminal hydrolase 4                               | 210.45   | 7.9   | 108343 | 5   | 0.00424737 | 2.896945947 | 0.074072823 | 1.1398435e-291 | 0 | 0.029970814 |
| P10518 | Alad     | Delta-aminolevulinic acid dehydratase                                 | 433.91   | 32.12 | 36024  | 7   | 0.00425123 | 2.193581045 | 0.074072823 | 4.6268646e-291 | 0 | 0.029970814 |
| P42932 | Cct8     | T-complex protein 1 subunit theta                                     | 1788.49  | 55.11 | 59555  | 33  | 0.00426939 | 1.754216815 | 0.074072823 | 1.875502e-290  | 0 | 0.029970814 |
| Q3TIR1 | Trappc13 | Trafficking protein particle complex subunit 13                       | 96.87    | 8.87  | 46477  | 2   | 0.00428092 | 2.396192844 | 0.074072823 | 7.5916731e-290 | 0 | 0.029970814 |
| A2AIV8 | Card9    | Caspase recruitment domain-containing protein 9                       | 50.62    | 1.87  | 62462  | 1   | 0.00436375 | 4.912521754 | 0.074838237 | 3.0686458e-289 | 0 | 0.03028051  |
| P22682 | Cbl      | E3 ubiquitin-protein ligase CBL                                       | 75.93    | 1.64  | 100564 | 1   | 0.00438174 | 4.061479572 | 0.074838237 | 1.2386408e-288 | 0 | 0.03028051  |
| O88746 | Tom1     | Target of Myb protein 1                                               | 302.76   | 17.68 | 54325  | 6   | 0.00440379 | 1.731504208 | 0.074838237 | 4.992676e-288  | 0 | 0.03028051  |
| Q9JKX6 | Nudt5    | ADP-sugar pyrophosphatase                                             | 97.17    | 13.3  | 23984  | 2   | 0.00447315 | 1.788082054 | 0.075567055 | 2.0096057e-287 | 0 | 0.0305754   |
| Q7TQH0 | Atxn2l   | Ataxin-2-like protein                                                 | 476.95   | 12.2  | 110649 | 9   | 0.00452857 | 2.005169719 | 0.075600956 | 8.0775168e-287 | 0 | 0.030589116 |
| A2ADY9 | Ddi2     | Protein DDI1 homolog 2                                                | 353.19   | 24.56 | 44591  | 6   | 0.00455374 | 2.293560929 | 0.075600956 | 3.2421601e-286 | 0 | 0.030589116 |
| Q8VDD5 | Myh9     | Myosin-9                                                              | 7869.631 | 52.91 | 226372 | 116 | 0.0046121  | 1.444633645 | 0.075600956 | 1.2995132e-285 | 0 | 0.030589116 |
| Q63486 | Rrag     | Ras-related GTP-binding protein A                                     | 115.7    | 6.71  | 36566  | 2   | 0.00462377 | 1.432738718 | 0.075600956 | 5.2013563e-285 | 0 | 0.030589116 |
| Q91VX2 | Ubap2    | Ubiquitin-associated protein 2                                        | 204.92   | 5.57  | 117966 | 4   | 0.00466678 | 3.250231381 | 0.075600956 | 2.0789415e-284 | 0 | 0.030589116 |
| Q8BY71 | Hat1     | Histone acetyltransferase type B catalytic subunit                    | 346.34   | 15.62 | 49278  | 5   | 0.00468382 | 2.948676731 | 0.075600956 | 8.2977002e-284 | 0 | 0.030589116 |
| Q3TXS7 | Psmd1    | 26S proteasome non-ATPase regulatory subunit 1                        | 1354.49  | 33.05 | 105730 | 23  | 0.00469633 | 1.480302501 | 0.075600956 | 3.3072199e-283 | 0 | 0.030589116 |
| Q9CYG7 | Tomm34   | Mitochondrial import receptor subunit TOM34                           | 300.82   | 26.54 | 34278  | 6   | 0.00479124 | 1.615412301 | 0.075600956 | 1.3163104e-282 | 0 | 0.030589116 |
| Q60854 | Serpinb6 | Serpin B6                                                             | 986.41   | 53.17 | 42599  | 15  | 0.00480689 | 1.660675316 | 0.075600956 | 5.2317083e-282 | 0 | 0.030589116 |
| Q99MZ7 | Pecr     | Peroxisomal trans-2-enoyl-CoA reductase                               | 118.11   | 7.92  | 32410  | 2   | 0.00485851 | 1.613726621 | 0.075600956 | 2.0764369e-281 | 0 | 0.030589116 |
| P20171 | Hras     | GTPase HRas                                                           | 171.62   | 20.11 | 21298  | 3   | 0.0048604  | 0.710101422 | 0.075600956 | 8.2297006e-281 | 0 | 0.030589116 |
| Q99KP6 | Prpf19   | Pre-mRNA-processing factor 19                                         | 730.57   | 46.03 | 55239  | 15  | 0.00489168 | 1.193496656 | 0.075600956 | 3.2571627e-280 | 0 | 0.030589116 |
| Q9JHJ0 | Tmod3    | Tropomodulin-3                                                        | 319.1    | 29.26 | 39503  | 7   | 0.00491448 | 1.932427506 | 0.075600956 | 1.2873156e-279 | 0 | 0.030589116 |
| P62259 | Ywhae    | 14-3-3 protein epsilon                                                | 1078.54  | 63.92 | 29174  | 19  | 0.00495583 | 2.010238083 | 0.075600956 | 5.0806682e-279 | 0 | 0.030589116 |
| O70145 | Ncf2     | Neutrophil cytosol factor 2                                           | 518.48   | 29.14 | 59485  | 11  | 0.00497782 | 1.84478308  | 0.075600956 | 2.0023819e-278 | 0 | 0.030589116 |
| Q99JI4 | Psmd6    | 26S proteasome non-ATPase regulatory subunit 6                        | 490.5    | 28.79 | 45536  | 10  | 0.00501668 | 1.724035377 | 0.075600956 | 7.8806729e-278 | 0 | 0.030589116 |
| P62317 | Snrpd2   | Small nuclear ribonucleoprotein Sm D2                                 | 359.22   | 52.54 | 13527  | 7   | 0.00504802 | 0.656273999 | 0.075600956 | 3.0972058e-277 | 0 | 0.030589116 |
| Q9Z1D1 | Eif3g    | Eukaryotic translation initiation factor 3 subunit G                  | 286.33   | 14.69 | 35638  | 5   | 0.00504867 | 1.73185838  | 0.075600956 | 1.2155343e-276 | 0 | 0.030589116 |
| P17918 | Pena     | Proliferating cell nuclear antigen                                    | 1734.93  | 66.67 | 28785  | 22  | 0.00505533 | 1.455896989 | 0.075600956 | 4.7638148e-276 | 0 | 0.030589116 |
| P31230 | Aimp1    | Aminoacyl tRNA synthase complex-interacting multifunctional protein 1 | 401.65   | 45.16 | 33997  | 8   | 0.0050613  | 1.4865485   | 0.075600956 | 1.8643739e-275 | 0 | 0.030589116 |
| P46664 | Adss     | Adenylosuccinate synthetase isozyme 2                                 | 769.26   | 35.31 | 50021  | 13  | 0.00507379 | 1.789608053 | 0.075600956 | 7.2862103e-275 | 0 | 0.030589116 |
| Q64737 | Gart     | Trifunctional purine biosynthetic protein adenosine-3                 | 1890.06  | 40.79 | 107503 | 29  | 0.00515051 | 1.799249498 | 0.075600956 | 2.8435508e-274 | 0 | 0.030589116 |
| O35309 | Nmi      | N-myc-interactor                                                      | 116.7    | 9.55  | 35236  | 2   | 0.00515331 | 1.981926593 | 0.075600956 | 1.1081816e-273 | 0 | 0.030589116 |
| Q9JLV6 | Pnkp     | Bifunctional polynucleotide phosphatase/kinase                        | 384.78   | 21.65 | 57223  | 6   | 0.0051578  | 1.872244598 | 0.075600956 | 4.3127229e-273 | 0 | 0.030589116 |
| O70200 | Aif1     | Allograft inflammatory factor 1                                       | 147.18   | 11.56 | 16911  | 1   | 0.00515949 | 3.953518665 | 0.075600956 | 1.6760343e-272 | 0 | 0.030589116 |

|        |          |                                                                        |         |       |        |    |            |             |             |                |                |             |
|--------|----------|------------------------------------------------------------------------|---------|-------|--------|----|------------|-------------|-------------|----------------|----------------|-------------|
| Q9D8T2 | Gsdmdc1  | Gasdermin-D                                                            | 125.87  | 7.19  | 53238  | 3  | 0.00520998 | 1.750831789 | 0.075600956 | 6.5043668e-272 | 0              | 0.030589116 |
| Q9JLQ0 | Cd2ap    | CD2-associated protein                                                 | 193.96  | 7.22  | 70450  | 4  | 0.00522584 | 1.698911944 | 0.075600956 | 2.5206815e-271 | 0              | 0.030589116 |
| P17427 | Ap2a2    | AP-2 complex subunit alpha-2                                           | 568.12  | 15.46 | 104017 | 11 | 0.00525344 | 1.897214721 | 0.075600956 | 9.7548762e-271 | 0              | 0.030589116 |
| P57776 | Eef1d    | Elongation factor 1-delta                                              | 1088.8  | 56.94 | 31293  | 16 | 0.00530318 | 1.740569744 | 0.075600956 | 3.7697839e-270 | 0              | 0.030589116 |
| Q91VW3 | Sh3bgrl3 | SH3 domain-binding glutamic acid-rich-like protein 3                   | 216.58  | 31.18 | 10477  | 4  | 0.00530673 | 1.776694253 | 0.075600956 | 1.454796e-269  | 0              | 0.030589116 |
| P46467 | Vps4b    | Vacuolar protein sorting-associated protein 4B                         | 376.17  | 22.07 | 49419  | 7  | 0.00530705 | 1.783948087 | 0.075600956 | 5.6063304e-269 | 0              | 0.030589116 |
| A2VCX1 | Tipr1    | TIP41-like protein                                                     | 102.7   | 10.7  | 31225  | 3  | 0.00532751 | 2.37288699  | 0.075600956 | 2.1574777e-268 | 0              | 0.030589116 |
| P97814 | Pstpip1  | Proline-serine-threonine phosphatase-interacting protein 1             | 136.51  | 8.92  | 47590  | 2  | 0.00535192 | 2.571277801 | 0.075600956 | 8.2909633e-268 | 0              | 0.030589116 |
| B2RRE7 | Otud4    | OTU domain-containing protein 4                                        | 91.01   | 2.08  | 123055 | 2  | 0.00537548 | 5.126799732 | 0.075600956 | 3.1816673e-267 | 0              | 0.030589116 |
| O89053 | Coro1a   | Coronin-1A                                                             | 1683.42 | 52.93 | 50989  | 27 | 0.00540547 | 1.245346174 | 0.075650098 | 1.2192581e-266 | 0              | 0.030609    |
| P84083 | Arf5     | ADP-ribosylation factor 5                                              | 687.26  | 48.89 | 20530  | 9  | 0.0054682  | 1.760394192 | 0.075816912 | 4.6658173e-266 | 0              | 0.030676495 |
| Q9D8N0 | Eef1g    | Elongation factor 1-gamma                                              | 1473.49 | 69.57 | 50061  | 24 | 0.00551659 | 1.513204513 | 0.075816912 | 1.7829986e-265 | 0              | 0.030676495 |
| Q3MID3 | Arfgap2  | ADP-ribosylation factor GTPase-activating protein 2                    | 226.48  | 11.92 | 56556  | 5  | 0.00555644 | 2.468174548 | 0.075816912 | 6.8040189e-265 | 0              | 0.030676495 |
| Q6MGD0 | Cuta     | Protein CutA                                                           | 41.44   | 7.91  | 18659  | 1  | 0.00558973 | 4.02884904  | 0.075816912 | 2.5928136e-264 | 0              | 0.030676495 |
| Q617R3 | Isoc1    | Isochorismatase domain-containing protein 1                            | 115.24  | 8.42  | 32002  | 2  | 0.00559431 | 2.160448297 | 0.075816912 | 9.8666195e-264 | 0              | 0.030676495 |
| Q3TRM8 | Hk3      | Hexokinase-3                                                           | 1098.27 | 25.49 | 100101 | 17 | 0.00559941 | 1.848582801 | 0.075816912 | 3.7493571e-263 | 0              | 0.030676495 |
| Q8BKZ9 | Pdhx     | Pyruvate dehydrogenase protein X component, mitochondrial              | 104.79  | 3.39  | 53999  | 2  | 0.00560764 | 4.166178031 | 0.075816912 | 1.4227763e-262 | 0              | 0.030676495 |
| Q6P5H2 | Nes      | Nestin                                                                 | 2852.46 | 35.3  | 207124 | 39 | 0.00564002 | 1.580068168 | 0.075816912 | 5.3914778e-262 | 0              | 0.030676495 |
| Q99MD9 | Nasp     | Nuclear autoantigenic sperm protein                                    | 531.58  | 14.88 | 83954  | 7  | 0.00565787 | 1.862310238 | 0.075816912 | 2.0401893e-261 | 0              | 0.030676495 |
| Q3UM18 | Lsg1     | Large subunit GTPase 1 homolog                                         | 43.9    | 2.17  | 73157  | 1  | 0.00573071 | 3.011161858 | 0.075816912 | 7.7094713e-261 | 0              | 0.030676495 |
| O54984 | Asna1    | ATPase Asna1                                                           | 230.76  | 14.08 | 38823  | 5  | 0.00573181 | 1.844745908 | 0.075816912 | 2.9091775e-260 | 0              | 0.030676495 |
| P62774 | Mtpn     | Myotrophin                                                             | 239.8   | 35.59 | 12861  | 3  | 0.00573606 | 2.364911775 | 0.075816912 | 1.0962443e-259 | 0              | 0.030676495 |
| Q9ESS2 | Inpp5d   | Phosphatidylinositol 3,4,5-triphosphate 5-phosphatase 1                | 1091.19 | 24.43 | 133542 | 23 | 0.00580496 | 1.590119527 | 0.076097286 | 4.1251152e-259 | 0              | 0.030789938 |
| P35738 | Bckdhh   | 2-oxoisovalerate dehydrogenase subunit beta, mitochondrial             | 69.84   | 2.82  | 42823  | 1  | 0.00582005 | 4.267395059 | 0.076097286 | 1.5500881e-258 | 0              | 0.030789938 |
| P0C0A2 | Vps36    | Vacuolar protein-sorting-associated protein 36                         | 173.53  | 11.14 | 43718  | 4  | 0.00583723 | 1.882018533 | 0.076097286 | 5.816588e-258  | 0              | 0.030789938 |
| Q9WU28 | Pfdn5    | Prefoldin subunit 5                                                    | 104.86  | 14.29 | 17356  | 2  | 0.00588138 | 1.553477158 | 0.076324277 | 2.1795752e-257 | 0              | 0.030881781 |
| Q99LE6 | Abcf2    | ATP-binding cassette sub-family F member 2                             | 124.97  | 5.57  | 71782  | 3  | 0.00594491 | 2.656609225 | 0.076799659 | 8.1558101e-257 | 0              | 0.031074127 |
| Q9R0P3 | Esd      | S-formylglutathione hydrolase                                          | 950.34  | 68.44 | 31320  | 14 | 0.00601052 | 1.391971596 | 0.0768069   | 3.0475725e-256 | 0              | 0.031077057 |
| Q4KM73 | Cmpk1    | UMP-CMP kinase                                                         | 380.87  | 47.45 | 22169  | 8  | 0.00602171 | 1.635676249 | 0.0768069   | 1.1371891e-255 | 0              | 0.031077057 |
| Q1AAU6 | Asap1    | Arf-GAP with SH3 domain, ANK repeat and PH domain-containing protein 1 | 158.6   | 5.42  | 127088 | 3  | 0.00602618 | 1.888644483 | 0.0768069   | 4.2374357e-255 | 0              | 0.031077057 |
| Q9EPB4 | Pycard   | Apoptosis-associated speck-like protein containing a CARD              | 168.67  | 25.39 | 21459  | 3  | 0.00608977 | 2.296095695 | 0.076960515 | 1.576759e-254  | 0              | 0.031139212 |
| E9PVA8 | Gcn1     | eIF-2-alpha kinase activator GCN1                                      | 214.6   | 2.47  | 293021 | 6  | 0.00609331 | 2.650327458 | 0.076960515 | 5.8589433e-254 | 4.9406565e-324 | 0.031139212 |
| O88456 | Capns1   | Calpain small subunit 1                                                | 189.41  | 15.99 | 28463  | 3  | 0.00614198 | 1.276363711 | 0.076960515 | 2.1740279e-253 | 2.9643939e-323 | 0.031139212 |
| Q6A0A2 | Larp4b   | La-related protein 4B                                                  | 64.5    | 2.29  | 81627  | 1  | 0.00617027 | 5.674901646 | 0.076960515 | 8.0556903e-253 | 1.7292298e-322 | 0.031139212 |
| Q5BJQ2 | Mindy1   | Ubiquitin carboxyl-terminal hydrolase MINDY-1                          | 48      | 2.07  | 52729  | 1  | 0.00617302 | 2.11627285  | 0.076960515 | 2.9807962e-252 | 1.0474192e-321 | 0.031139212 |
| Q99P31 | Hspbp1   | Hsp70-binding protein 1                                                | 459.18  | 32.21 | 39167  | 9  | 0.00626055 | 2.446992214 | 0.077712516 | 1.1014219e-251 | 6.3783875e-321 | 0.03144348  |
| P62843 | Rps15    | 40S ribosomal protein S15                                              | 323.18  | 39.31 | 17040  | 5  | 0.00631697 | 2.289703878 | 0.078073393 | 4.0641248e-251 | 3.8576646e-320 | 0.031589496 |
| Q80TM9 | Nisch    | Nischarin                                                              | 244.24  | 3.45  | 175012 | 4  | 0.00635717 | 2.200845109 | 0.078231558 | 1.4975188e-250 | 2.3196382e-319 | 0.031653492 |
| P29351 | Ptpn6    | Tyrosine-protein phosphatase non-receptor type 6                       | 1722.83 | 54.62 | 67559  | 30 | 0.00641511 | 1.229965748 | 0.078605724 | 5.5102272e-250 | 1.3892484e-318 | 0.031804884 |
| Q9Z0H1 | Wdr46    | WD repeat-containing protein 46                                        | 425.78  | 22.19 | 69048  | 9  | 0.00647019 | 0.719912344 | 0.078652239 | 2.0246907e-249 | 8.2756638e-318 | 0.031823705 |
| Q62261 | Sptbn1   | Spectrin beta chain, non-erythrocytic 1                                | 49.45   | 0.38  | 274223 | 1  | 0.006474   | 3.083500281 | 0.078652239 | 7.4291626e-249 | 4.9045837e-317 | 0.031823705 |
| Q5U2Z5 | Cmtr1    | Cap-specific mRNA (nucleoside-2'-O-)-methyltransferase 1               | 66.09   | 1.79  | 95619  | 2  | 0.00656304 | 3.138934336 | 0.0788112   | 2.7221562e-248 | 2.9030447e-316 | 0.031888022 |
| P50516 | Atp6v1a  | V-type proton ATPase catalytic subunit A                               | 1703.4  | 49.43 | 68326  | 26 | 0.00658536 | 1.426762814 | 0.0788112   | 9.9604339e-248 | 1.7053425e-315 | 0.031888022 |
| Q8BP47 | Nars     | Asparagine--tRNA ligase, cytoplasmic                                   | 784.23  | 27.55 | 64279  | 15 | 0.00658537 | 1.585905564 | 0.0788112   | 3.6394479e-247 | 9.9915915e-315 | 0.031888022 |
| Q80WS3 | Fbll1    | rRNA/tRNA 2'-O-methyltransferase fibrillar-like protein 1              | 157.08  | 11.46 | 33339  | 3  | 0.00662428 | 0.607542629 | 0.0788112   | 1.3279595e-246 | 5.848379e-314  | 0.031888022 |
| P02798 | Mt2      | Metallothionein-2                                                      | 66.51   | 19.67 | 6115   | 1  | 0.00662511 | 2.026552231 | 0.0788112   | 4.8386723e-246 | 3.4101872e-313 | 0.031888022 |

|        |          |                                                                          |         |       |        |    |            |             |             |                |                |             |
|--------|----------|--------------------------------------------------------------------------|---------|-------|--------|----|------------|-------------|-------------|----------------|----------------|-------------|
| Q91YP3 | Dera     | Deoxyribose-phosphate aldolase                                           | 254.64  | 20.75 | 34975  | 5  | 0.00668626 | 1.879976199 | 0.078969743 | 1.7605959e-245 | 1.9864248e-312 | 0.031952171 |
| Q8BMA6 | Srp68    | Signal recognition particle subunit SRP68                                | 165.72  | 6.72  | 70574  | 3  | 0.00669376 | 1.466700781 | 0.078969743 | 6.3971315e-245 | 1.1508514e-311 | 0.031952171 |
| P62702 | Rps4x    | 40S ribosomal protein S4, X isoform                                      | 1362.98 | 65.78 | 29598  | 24 | 0.00672916 | 1.450766592 | 0.079060734 | 2.3211488e-244 | 6.6574795e-311 | 0.031988987 |
| Q9CXY6 | Ilf2     | Interleukin enhancer-binding factor 2                                    | 529.81  | 37.18 | 43062  | 9  | 0.00675976 | 0.621517778 | 0.07909479  | 8.4103258e-244 | 3.8377336e-310 | 0.032002766 |
| Q9CWX0 | Dph5     | Diphthine methyl ester synthase                                          | 74.21   | 8.19  | 31218  | 1  | 0.00681359 | 2.369195812 | 0.079290343 | 3.0430901e-243 | 2.2053096e-309 | 0.03208189  |
| Q6P9P6 | Kif11    | Kinesin-like protein KIF11                                               | 112.39  | 3.99  | 118027 | 3  | 0.00686566 | 2.263323165 | 0.079290343 | 1.0995347e-242 | 1.2612071e-308 | 0.03208189  |
| Q9CT10 | Ranbp3   | Ran-binding protein 3                                                    | 374.52  | 16.9  | 52573  | 6  | 0.00686606 | 2.206150024 | 0.079290343 | 3.967302e-242  | 7.1794942e-308 | 0.03208189  |
| P33174 | Kif4     | Chromosome-associated kinesin KIF4                                       | 101.93  | 2.11  | 139519 | 2  | 0.00688757 | 2.341186907 | 0.079290343 | 1.4294658e-241 | 4.0829076e-307 | 0.03208189  |
| Q921I2 | Klhdc4   | Kelch domain-containing protein 4                                        | 38.72   | 2.57  | 64860  | 1  | 0.00692451 | 3.240211204 | 0.079395437 | 5.1433307e-241 | 2.3161827e-306 | 0.032124412 |
| Q9JMW6 | Arpc3    | Actin-related protein 2/3 complex subunit 3                              | 372.7   | 44.38 | 20525  | 7  | 0.00698978 | 1.428480969 | 0.079823322 | 1.8480228e-240 | 1.3093068e-305 | 0.03229754  |
| Q9CQI6 | Cot11    | Coactosin-like protein                                                   | 599.88  | 76.06 | 15944  | 12 | 0.00705879 | 1.673742932 | 0.079969993 | 6.6307467e-240 | 7.3610036e-305 | 0.032356885 |
| P62075 | Timm13   | Mitochondrial import inner membrane translocase subunit Tim13            | 105.98  | 14.74 | 10458  | 1  | 0.0070811  | 4.866585746 | 0.079969993 | 2.3757993e-239 | 4.1150097e-304 | 0.032356885 |
| Q0VGB7 | PPP4r2   | Serine/threonine-protein phosphatase 4 regulatory subunit 2              | 329.21  | 20.62 | 46479  | 6  | 0.00708666 | 1.547079082 | 0.079969993 | 8.5005947e-239 | 2.2947307e-303 | 0.032356885 |
| O08638 | Myh11    | Myosin-11                                                                | 590.56  | 5.48  | 227028 | 11 | 0.00713884 | 1.379180512 | 0.080101464 | 3.0372539e-238 | 1.2779461e-302 | 0.03241008  |
| Q60591 | Nfatc2   | Nuclear factor of activated T-cells, cytoplasmic 2                       | 230.88  | 9.39  | 100020 | 5  | 0.00715895 | 2.011202636 | 0.080101464 | 1.0836901e-237 | 7.0852073e-302 | 0.03241008  |
| Q9CZ04 | Cops7a   | COP9 signalosome complex subunit 7a                                      | 282.99  | 19.64 | 30224  | 4  | 0.00718248 | 1.685608278 | 0.080101464 | 3.861192e-237  | 3.919153e-301  | 0.03241008  |
| Q9CQE8 | RTRAF    | RNA transcription, translation and transport factor protein              | 48.88   | 12.3  | 28152  | 1  | 0.00723499 | 3.969283928 | 0.080106302 | 1.3738203e-236 | 2.1623938e-300 | 0.032412037 |
| Q91V92 | Acly     | ATP-citrate synthase                                                     | 1852.34 | 31.35 | 119728 | 28 | 0.0072692  | 1.663487297 | 0.080106302 | 4.8812463e-236 | 1.1878219e-299 | 0.032412037 |
| Q6URW6 | Myh14    | Myosin-14                                                                | 471.68  | 4.1   | 228586 | 9  | 0.00727889 | 1.378218392 | 0.080106302 | 1.7319039e-235 | 6.5039183e-299 | 0.032412037 |
| Q3UBX0 | Tmem109  | Transmembrane protein 109                                                | 111.18  | 11.52 | 26306  | 2  | 0.00729514 | 6.908401959 | 0.080106302 | 6.1363357e-235 | 3.5555545e-298 | 0.032412037 |
| P62278 | Rps13    | 40S ribosomal protein S13                                                | 404.73  | 43.71 | 17222  | 8  | 0.00737892 | 2.038460654 | 0.080151123 | 2.1711344e-234 | 1.9398232e-297 | 0.032430172 |
| O35643 | Ap1b1    | AP-1 complex subunit beta-1                                              | 1039.42 | 27.47 | 103935 | 18 | 0.00738988 | 1.573062883 | 0.080151123 | 7.6710812e-234 | 1.0515775e-296 | 0.032430172 |
| Q9D2V7 | Coro7    | Coronin-7                                                                | 438.61  | 16.49 | 100812 | 9  | 0.00739525 | 1.539269423 | 0.080151123 | 2.7065667e-233 | 5.6911387e-296 | 0.032430172 |
| Q3UFY7 | Nt5c3b   | 7-methylguanosine phosphate-specific 5'-nucleotidase                     | 74.92   | 6.67  | 34425  | 2  | 0.00741152 | 2.358306064 | 0.080151123 | 9.536152e-233  | 3.0760399e-295 | 0.032430172 |
| P14115 | Rpl27a   | 60S ribosomal protein L27a                                               | 313.86  | 31.08 | 16605  | 5  | 0.00754182 | 1.424699159 | 0.081252492 | 3.3552113e-232 | 1.6592649e-294 | 0.0328758   |
| Q9D4H8 | Cul2     | Cullin-2                                                                 | 49.27   | 1.74  | 86877  | 1  | 0.00757467 | 4.891115935 | 0.08129954  | 1.1788509e-231 | 8.8681315e-294 | 0.032894837 |
| Q5SW19 | Cluh     | Clustered mitochondria protein homolog                                   | 186.59  | 3.88  | 148068 | 4  | 0.0076046  | 3.432640514 | 0.081315054 | 4.1360915e-231 | 4.7254294e-293 | 0.032901114 |
| P80314 | Cct2     | T-complex protein 1 subunit beta                                         | 2029.75 | 64.3  | 57477  | 32 | 0.00773483 | 1.551934299 | 0.081850432 | 1.4491512e-230 | 2.5108847e-292 | 0.033117734 |
| Q8BK64 | Ahsa1    | Activator of 90 kDa heat shock protein ATPase homolog 1                  | 230.53  | 21.6  | 38117  | 6  | 0.00773516 | 1.881621764 | 0.081850432 | 5.0702518e-230 | 1.3222344e-291 | 0.033117734 |
| Q9DBG6 | Rpn2     | Dolichyl-diphosphooligosaccharide--protein glycosyltransferase subunit 2 | 875.04  | 29.32 | 69063  | 13 | 0.00775576 | 0.683550852 | 0.081850432 | 1.7714856e-229 | 6.9562127e-291 | 0.033117734 |
| P97429 | Anxa4    | Annexin A4                                                               | 1299.64 | 55.17 | 35916  | 18 | 0.00781038 | 0.734783679 | 0.081850432 | 6.1807051e-229 | 3.6515866e-290 | 0.033117734 |
| P42225 | Stat1    | Signal transducer and activator of transcription 1                       | 206.83  | 6.54  | 87197  | 3  | 0.0078638  | 3.404215028 | 0.081850432 | 2.1534296e-228 | 1.9087132e-289 | 0.033117734 |
| Q5FVC2 | Arhgef2  | Rho guanine nucleotide exchange factor 2                                 | 452.36  | 11.37 | 111909 | 8  | 0.00788938 | 1.268108987 | 0.081850432 | 7.4923076e-228 | 9.9355759e-289 | 0.033117734 |
| Q8K0C9 | Gmcs     | GDP-mannose 4,6 dehydratase                                              | 127.7   | 6.72  | 41985  | 2  | 0.00795831 | 3.704284365 | 0.081850432 | 2.6031116e-227 | 5.1590787e-288 | 0.033117734 |
| Q91VI7 | Rnh1     | Ribonuclease inhibitor                                                   | 2016.51 | 74.78 | 49816  | 24 | 0.00796054 | 1.882016435 | 0.081850432 | 9.0315487e-227 | 2.6653976e-287 | 0.033117734 |
| Q8K124 | Plekho2  | Pleckstrin homology domain-containing family O member 2                  | 133.36  | 9.29  | 53872  | 3  | 0.00797745 | 1.753500002 | 0.081850432 | 3.1291323e-226 | 1.3755867e-286 | 0.033117734 |
| O70194 | Eif3d    | Eukaryotic translation initiation factor 3 subunit D                     | 987.19  | 39.42 | 63989  | 16 | 0.00798843 | 1.808845684 | 0.081850432 | 1.0826246e-225 | 7.0855377e-286 | 0.033117734 |
| P97311 | Mcm6     | DNA replication licensing factor MCM6                                    | 1179.58 | 31.06 | 92867  | 20 | 0.00801658 | 1.188515426 | 0.081850432 | 3.7404518e-225 | 3.6439207e-285 | 0.033117734 |
| Q8R050 | Gspt1    | Eukaryotic peptide chain release factor GTP-binding subunit ERF3A        | 416.34  | 21.7  | 68625  | 9  | 0.00801792 | 1.453585054 | 0.081850432 | 1.2905133e-224 | 1.8691243e-284 | 0.033117734 |
| Q7TPR4 | Actn1    | Alpha-actinin-1                                                          | 1152.69 | 26.46 | 103068 | 20 | 0.00802736 | 1.627300342 | 0.081850432 | 4.4462423e-224 | 9.5777885e-284 | 0.033117734 |
| Q4V7A6 | Phf10    | PHD finger protein 10                                                    | 39.26   | 2.41  | 55884  | 1  | 0.00814992 | 2.353776814 | 0.082804373 | 1.5297342e-223 | 4.9005304e-283 | 0.033503711 |
| P50396 | Gdi1     | Rab GDP dissociation inhibitor alpha                                     | 467.39  | 18.79 | 50522  | 8  | 0.00824178 | 1.616221282 | 0.08332863  | 5.255706e-223  | 2.4872685e-282 | 0.033715833 |
| P83732 | Rpl24    | 60S ribosomal protein L24                                                | 525.09  | 37.58 | 17779  | 10 | 0.0082599  | 1.549158247 | 0.08332863  | 1.8031769e-222 | 1.2546213e-281 | 0.033715833 |
| P43277 | Hist1h1d | Histone H1.3                                                             | 813.93  | 38.01 | 22100  | 13 | 0.00829423 | 0.506774997 | 0.083359388 | 6.1778561e-222 | 6.3161359e-281 | 0.033728277 |
| O55023 | Impa1    | Inositol monophosphatase 1                                               | 402.31  | 24.91 | 30436  | 8  | 0.00832134 | 1.612557131 | 0.083359388 | 2.1136323e-221 | 3.1706021e-280 | 0.033728277 |
| P97360 | Etv6     | Transcription factor ETV6                                                | 50.2    | 1.44  | 56406  | 1  | 0.00842292 | 2.423342425 | 0.083637623 | 7.2212642e-221 | 1.5876845e-279 | 0.033840855 |



|        |          |                                                                          |         |       |        |    |            |             |             |                |                |             |
|--------|----------|--------------------------------------------------------------------------|---------|-------|--------|----|------------|-------------|-------------|----------------|----------------|-------------|
| Q3T1I4 | Prrc1    | Protein PRRC1                                                            | 65.9    | 2.93  | 46295  | 1  | 0.00842624 | 2.839726999 | 0.083637623 | 2.4637078e-220 | 7.8980049e-279 | 0.033840855 |
| Q61316 | Hspa4    | Heat shock 70 kDa protein 4                                              | 2312.93 | 56.84 | 94133  | 39 | 0.008437   | 1.550219884 | 0.083637623 | 8.3937744e-220 | 3.9245369e-278 | 0.033840855 |
| P32921 | Wars     | Tryptophan--tRNA ligase, cytoplasmic                                     | 568.58  | 30.77 | 54358  | 10 | 0.00848322 | 2.008074519 | 0.083804846 | 2.8557325e-219 | 1.9471418e-277 | 0.033908515 |
| P17220 | Psma2    | Proteasome subunit alpha type-2                                          | 707.3   | 41.45 | 25927  | 10 | 0.00855662 | 1.529568796 | 0.084032246 | 9.7021921e-219 | 9.6271023e-277 | 0.034000524 |
| Q61183 | Papola   | Poly(A) polymerase alpha                                                 | 94.89   | 2.84  | 82309  | 2  | 0.00856511 | 2.940383703 | 0.084032246 | 3.2916651e-218 | 4.7363665e-276 | 0.034000524 |
| P35444 | Comp     | Cartilage oligomeric matrix protein                                      | 38.6    | 1.06  | 82664  | 1  | 0.00867321 | 3.216219202 | 0.084740033 | 1.1151951e-217 | 2.3269807e-275 | 0.034286904 |
| P14131 | Rps16    | 40S ribosomal protein S16                                                | 682.93  | 71.92 | 16445  | 14 | 0.00869661 | 1.33065254  | 0.084740033 | 3.7729362e-217 | 1.1355356e-274 | 0.034286904 |
| P63036 | Dnaj1    | DnaJ homolog subfamily A member 1                                        | 276.26  | 19.9  | 44868  | 6  | 0.00879353 | 2.247284402 | 0.085392961 | 1.2746769e-216 | 5.5292237e-274 | 0.034551087 |
| Q6P1B1 | Xpnpep1  | Xaa-Pro aminopeptidase 1                                                 | 556.77  | 26.32 | 69591  | 11 | 0.00892801 | 1.531137051 | 0.085976222 | 4.3004392e-216 | 2.676016e-273  | 0.034787082 |
| Q9CSU0 | Rprd1b   | Regulation of nuclear pre-mRNA domain-containing protein 1B              | 189.71  | 16.56 | 36884  | 4  | 0.00893427 | 1.57861466  | 0.085976222 | 1.4488304e-215 | 1.2848468e-272 | 0.034787082 |
| Q642C0 | Dnajc8   | DnaJ homolog subfamily C member 8                                        | 79.54   | 15.81 | 29813  | 2  | 0.00900451 | 6.013343724 | 0.085976222 | 4.8743225e-215 | 6.161381e-272  | 0.034787082 |
| Q9D8E6 | Rpl4     | 60S ribosomal protein L4                                                 | 1231.25 | 43.44 | 47154  | 19 | 0.00902844 | 1.296816251 | 0.085976222 | 1.6375817e-214 | 2.9412423e-271 | 0.034787082 |
| Q80X50 | Ubap2l   | Ubiquitin-associated protein 2-like                                      | 395.32  | 10.03 | 116799 | 6  | 0.00906395 | 1.975278992 | 0.085976222 | 5.4939365e-214 | 1.401054e-270  | 0.034787082 |
| P62908 | Rps3     | 40S ribosomal protein S3                                                 | 1407.47 | 75.72 | 26674  | 25 | 0.00916213 | 1.62840332  | 0.085976222 | 1.8405866e-213 | 6.6557093e-270 | 0.034787082 |
| Q6GX84 | Fignl1   | Fidgetin-like protein 1                                                  | 90.19   | 2.81  | 74197  | 2  | 0.00916245 | 1.741241589 | 0.085976222 | 6.1577323e-213 | 3.1432011e-269 | 0.034787082 |
| P26516 | Psmc7    | 26S proteasome non-ATPase regulatory subunit 7                           | 496.05  | 27.1  | 36540  | 8  | 0.00916668 | 1.585138684 | 0.085976222 | 2.0572035e-212 | 1.483034e-268  | 0.034787082 |
| P21670 | Psma4    | Proteasome subunit alpha type-4                                          | 704.89  | 65.13 | 29498  | 14 | 0.00921387 | 1.547374839 | 0.085976222 | 6.8631832e-212 | 6.9894312e-268 | 0.034787082 |
| P70188 | Kifap3   | Kinesin-associated protein 3                                             | 42.04   | 2.52  | 91291  | 1  | 0.00922201 | 7.624738672 | 0.085976222 | 2.2864715e-211 | 3.2832995e-267 | 0.034787082 |
| Q91YQ5 | Rpn1     | Dolichyl-diphosphooligosaccharide--protein glycosyltransferase subunit 1 | 1542.48 | 52.96 | 68528  | 26 | 0.00922413 | 0.76775143  | 0.085976222 | 7.6067269e-211 | 1.5403123e-266 | 0.034787082 |
| Q5U2Q7 | Etf1     | Eukaryotic peptide chain release factor subunit 1                        | 304.23  | 22.43 | 49031  | 6  | 0.00924098 | 1.522296357 | 0.085976222 | 2.5270956e-210 | 7.2188341e-266 | 0.034787082 |
| O08739 | Ampd3    | AMP deaminase 3                                                          | 42.12   | 0.91  | 88652  | 1  | 0.00925168 | 2.930812699 | 0.085976222 | 8.3837307e-210 | 3.3772639e-265 | 0.034787082 |
| Q3TX08 | Trmt1    | tRNA (guanine(26)-N(2))-dimethyltransferase                              | 123.71  | 6.49  | 72350  | 2  | 0.00931073 | 2.19562155  | 0.085976222 | 2.7774403e-209 | 1.5777419e-264 | 0.034787082 |
| Q5M823 | Nudcd2   | NudC domain-containing protein 2                                         | 356.7   | 43.95 | 17674  | 6  | 0.00934993 | 1.705211781 | 0.085976222 | 9.1884846e-209 | 7.3424025e-264 | 0.034787082 |
| O88545 | Cops6    | COP9 signalosome complex subunit 6                                       | 168.65  | 8.33  | 35880  | 4  | 0.00935559 | 2.180480933 | 0.085976222 | 3.0355316e-208 | 3.4072621e-263 | 0.034787082 |
| P15864 | Hist1h1c | Histone H1.2                                                             | 908.99  | 43.4  | 21267  | 14 | 0.00936554 | 0.521168101 | 0.085976222 | 1.0014225e-207 | 1.5792733e-262 | 0.034787082 |
| P97372 | Psme2    | Proteasome activator complex subunit 2                                   | 410.75  | 39.33 | 27057  | 6  | 0.00939843 | 1.642349226 | 0.086001681 | 3.2990702e-207 | 7.3097303e-262 | 0.034797383 |
| Q9WVA3 | Bub3     | Mitotic checkpoint protein BUB3                                          | 519.29  | 29.45 | 36955  | 9  | 0.00950476 | 1.249810604 | 0.086696756 | 1.0853191e-206 | 3.3748132e-261 | 0.035078619 |
| Q9ERF3 | Wdr61    | WD repeat-containing protein 61                                          | 97.8    | 12.46 | 33773  | 2  | 0.00960496 | 2.096123878 | 0.086849911 | 3.5654546e-206 | 1.5486708e-260 | 0.035140588 |
| P67984 | Rpl22    | 60S ribosomal protein L22                                                | 333.52  | 39.84 | 14759  | 5  | 0.00964722 | 1.675056908 | 0.086849911 | 1.1696717e-205 | 7.06619e-260   | 0.035140588 |
| Q9R1Q6 | Tmem176b | Transmembrane protein 176B                                               | 48.2    | 5.7   | 28367  | 1  | 0.00967174 | 3.852785091 | 0.086849911 | 3.8318154e-205 | 3.2147372e-259 | 0.035140588 |
| Q4QQT6 | Brix1    | Ribosome biogenesis protein BRX1 homolog                                 | 199.78  | 13.07 | 41115  | 5  | 0.00974651 | 0.651114948 | 0.086849911 | 1.2535357e-204 | 1.4595167e-258 | 0.035140588 |
| Q6P8X1 | Snx6     | Sorting nexin-6                                                          | 187.77  | 15.02 | 46649  | 4  | 0.00984359 | 2.212881454 | 0.086849911 | 4.0950606e-204 | 6.597051e-258  | 0.035140588 |
| Q62192 | Cd180    | CD180 antigen                                                            | 200.21  | 6.96  | 74302  | 3  | 0.00985371 | 2.540436445 | 0.086849911 | 1.3359045e-203 | 2.9657259e-257 | 0.035140588 |
| P05132 | Prkaca   | cAMP-dependent protein kinase catalytic subunit alpha                    | 277.34  | 16.24 | 40571  | 5  | 0.00994378 | 1.862775392 | 0.086849911 | 4.3519304e-203 | 1.3314335e-256 | 0.035140588 |
| Q3UIA2 | Arhgap17 | Rho GTPase-activating protein 17                                         | 126.71  | 2.6   | 92202  | 2  | 0.00996226 | 1.396140403 | 0.086849911 | 1.4157281e-202 | 5.9472112e-256 | 0.035140588 |
| Q6ZQ08 | Cnot1    | CCR4-NOT transcription complex subunit 1                                 | 124.51  | 1.22  | 266808 | 3  | 0.00996849 | 2.249877673 | 0.086849911 | 4.5990607e-202 | 2.651865e-255  | 0.035140588 |
| Q68FL6 | Mars     | Methionine--tRNA ligase, cytoplasmic                                     | 821.32  | 21.4  | 101431 | 14 | 0.00998413 | 1.925223045 | 0.086849911 | 1.4919345e-201 | 1.1810756e-254 | 0.035140588 |
| O70551 | Srpk1    | SRSF protein kinase 1                                                    | 288.67  | 11.27 | 73088  | 5  | 0.00998488 | 1.563905204 | 0.086849911 | 4.8330541e-201 | 5.2517569e-254 | 0.035140588 |
| Q9CVB6 | Arpc2    | Actin-related protein 2/3 complex subunit 2                              | 913.72  | 46.33 | 34357  | 15 | 0.01002415 | 1.54101254  | 0.086849911 | 1.563453e-200  | 2.3330684e-253 | 0.035140588 |
| Q9CPN8 | Igf2bp3  | Insulin-like growth factor 2 mRNA-binding protein 3                      | 718.01  | 25.04 | 63575  | 12 | 0.01005202 | 1.494116234 | 0.086849911 | 5.0505565e-200 | 1.0336755e-252 | 0.035140588 |
| Q4QQR9 | Memo1    | Protein MEMO1                                                            | 49.26   | 4.71  | 33679  | 1  | 0.01007878 | 2.767981909 | 0.086849911 | 1.6292391e-199 | 4.5698541e-252 | 0.035140588 |
| P68101 | Eif2s1   | Eukaryotic translation initiation factor 2 subunit 1                     | 875.77  | 56.19 | 36108  | 15 | 0.01011524 | 1.501349032 | 0.086849911 | 5.2483355e-199 | 2.0160691e-251 | 0.035140588 |
| Q9JM14 | Nt5c     | 5'(3')-deoxyribonucleotidase, cytosolic type                             | 235.2   | 20    | 23076  | 4  | 0.01017117 | 1.57538854  | 0.086849911 | 1.6882994e-198 | 8.8716813e-251 | 0.035140588 |
| Q9WVQ5 | Apip     | Methylthioribulose-1-phosphate dehydratase                               | 149.19  | 15.35 | 26949  | 3  | 0.01017985 | 2.793871005 | 0.086849911 | 5.4233598e-198 | 3.8907125e-250 | 0.035140588 |
| Q9ESL4 | Map3k20  | Mitogen-activated protein kinase kinase kinase 20                        | 49.37   | 1.37  | 91720  | 1  | 0.01020082 | 2.240271104 | 0.086849911 | 1.7397162e-197 | 1.7040985e-249 | 0.035140588 |
| Q07813 | Bax      | Apoptosis regulator BAX                                                  | 354.61  | 40.62 | 21395  | 5  | 0.01021255 | 1.475022101 | 0.086849911 | 5.5728765e-197 | 7.4501481e-249 | 0.035140588 |
| Q6P9R2 | Oxsr1    | Serine/threonine-protein kinase OSR1                                     | 41.43   | 1.52  | 58214  | 1  | 0.01021707 | 2.338087595 | 0.086849911 | 1.7826718e-196 | 3.2525085e-248 | 0.035140588 |
| Q64674 | Srm      | Spermidine synthase                                                      | 395.57  | 28.48 | 33995  | 7  | 0.01023651 | 1.796408706 | 0.086849911 | 5.6944829e-196 | 1.4183834e-247 | 0.035140588 |
| Q62448 | Eif4g2   | Eukaryotic translation initiation factor 4 gamma 2                       | 512.45  | 14.68 | 102106 | 10 | 0.01028153 | 1.929547837 | 0.086849911 | 1.8164694e-195 | 6.1745222e-247 | 0.035140588 |
| Q9CXW3 | Cacybp   | Calcyclin-binding protein                                                | 332.08  | 27.07 | 26510  | 6  | 0.010286   | 2.021613597 | 0.086849911 | 5.7861903e-195 | 2.6801517e-246 | 0.035140588 |

|        |         |                                                                                     |         |       |        |    |            |             |             |                |                |             |
|--------|---------|-------------------------------------------------------------------------------------|---------|-------|--------|----|------------|-------------|-------------|----------------|----------------|-------------|
| O09061 | Psmbl   | Proteasome subunit beta type-1                                                      | 902.13  | 54.17 | 26372  | 13 | 0.01028911 | 1.305143385 | 0.086849911 | 1.8405523e-194 | 1.1620855e-245 | 0.035140588 |
| Q3VIL4 | Nt5c2   | Cytosolic purine 5'-nucleotidase                                                    | 252.59  | 10.18 | 64809  | 5  | 0.01030758 | 2.384178806 | 0.086849911 | 5.8464784e-194 | 5.0334354e-245 | 0.035140588 |
| P97855 | G3bp1   | Ras GTPase-activating protein-binding protein 1                                     | 810.68  | 40.22 | 51829  | 15 | 0.01031248 | 1.724583854 | 0.086849911 | 1.8545189e-193 | 2.1764363e-244 | 0.035140588 |
| Q9D8W5 | Psm12   | 26S proteasome non-ATPase regulatory subunit 12                                     | 660.49  | 26.75 | 52895  | 12 | 0.01051386 | 1.653608991 | 0.088285489 | 5.8743371e-193 | 9.4002667e-244 | 0.035721441 |
| Q5XI72 | Eif4h   | Eukaryotic translation initiation factor 4H                                         | 300.69  | 21.37 | 27324  | 5  | 0.01055014 | 1.441498867 | 0.088330352 | 1.8581343e-192 | 4.0212137e-243 | 0.035739593 |
| Q9QXK3 | Copg2   | Coatmer subunit gamma-2                                                             | 486.4   | 11.14 | 97681  | 8  | 0.01058971 | 1.569070552 | 0.088378799 | 5.8692945e-192 | 1.7159731e-242 | 0.035759196 |
| Q62348 | Tsn     | Translin                                                                            | 380.23  | 31.14 | 26201  | 7  | 0.01062554 | 1.783048688 | 0.088378799 | 1.8513361e-191 | 7.3036899e-242 | 0.035759196 |
| Q8R5H1 | Usp15   | Ubiquitin carboxyl-terminal hydrolase 15                                            | 176.33  | 5.71  | 112325 | 4  | 0.01067368 | 2.392315588 | 0.088378799 | 5.8314306e-191 | 3.1011648e-241 | 0.035759196 |
| P47860 | Pfkp    | ATP-dependent 6-phosphofructokinase, platelet type                                  | 723.76  | 13.58 | 85720  | 9  | 0.0107005  | 1.542138429 | 0.088378799 | 1.8342368e-190 | 1.3129121e-240 | 0.035759196 |
| Q8R016 | Blmh    | Bleomycin hydrolase                                                                 | 445.03  | 25.71 | 52511  | 9  | 0.01072846 | 2.29179313  | 0.088378799 | 5.7613746e-190 | 5.5471212e-240 | 0.035759196 |
| P11440 | Cdk1    | Cyclin-dependent kinase 1                                                           | 541.72  | 49.49 | 34107  | 12 | 0.01074166 | 2.15261071  | 0.088378799 | 1.8071208e-189 | 2.3388455e-239 | 0.035759196 |
| P03995 | Gfap    | Glial fibrillary acidic protein                                                     | 164.37  | 6.05  | 49900  | 3  | 0.01084924 | 1.657451952 | 0.089007432 | 5.6602882e-189 | 9.8470434e-239 | 0.036013548 |
| Q9D0F9 | Pgm1    | Phosphoglucomutase-1                                                                | 431.85  | 17.08 | 61418  | 7  | 0.01089535 | 1.72682847  | 0.089129611 | 1.7704358e-188 | 4.1236504e-238 | 0.036062984 |
| Q63945 | Set     | Protein SET                                                                         | 508.91  | 37.72 | 33406  | 9  | 0.01094154 | 1.593779196 | 0.089251725 | 5.5298329e-188 | 1.7220468e-237 | 0.036112393 |
| A2AGT5 | Ckap5   | Cytoskeleton-associated protein 5                                                   | 457.24  | 5.81  | 225635 | 8  | 0.01101292 | 1.862634482 | 0.089578023 | 1.7247812e-187 | 7.1713047e-237 | 0.036244417 |
| Q9DBL7 | Coasy   | Bifunctional coenzyme A synthase                                                    | 248.51  | 14.03 | 62023  | 5  | 0.01107071 | 1.717738715 | 0.089792303 | 5.3721249e-187 | 2.9751008e-236 | 0.036331117 |
| Q99KK7 | Dpp3    | Dipeptidyl peptidase 3                                                              | 655.5   | 29.67 | 82898  | 12 | 0.01111488 | 1.802450696 | 0.089895167 | 1.6708916e-186 | 1.2302777e-235 | 0.036372737 |
| P57780 | Actn4   | Alpha-actinin-4                                                                     | 1551.8  | 35.31 | 104977 | 25 | 0.01118874 | 1.605340687 | 0.090169088 | 5.1896782e-186 | 5.073954e-235  | 0.036483569 |
| P61759 | Vbp1    | Prefoldin subunit 3                                                                 | 245.47  | 32.14 | 22436  | 5  | 0.01121192 | 3.137345959 | 0.090169088 | 1.609617e-185  | 2.0845937e-234 | 0.036483569 |
| O35593 | Psm14   | 26S proteasome non-ATPase regulatory subunit 14                                     | 324.09  | 27.1  | 34577  | 6  | 0.0112923  | 2.206318717 | 0.090522581 | 4.9853376e-185 | 8.5489033e-234 | 0.036626597 |
| Q9DAA6 | Exosc1  | Exosome complex component CSL4                                                      | 37.13   | 5.64  | 21424  | 1  | 0.01133414 | 2.817102252 | 0.090522581 | 1.5419008e-184 | 3.4916669e-233 | 0.036626597 |
| P62329 | Tmsb4x  | Thymosin beta-4                                                                     | 241.93  | 68.18 | 5053   | 4  | 0.01135099 | 1.637573218 | 0.090522581 | 4.7622051e-184 | 1.4225126e-232 | 0.036626597 |
| O35626 | Rasd1   | Dexamethasone-induced Ras-related protein 1                                         | 38.44   | 2.5   | 31684  | 1  | 0.01145799 | 2.815273321 | 0.09112133  | 1.4687555e-183 | 5.7863935e-232 | 0.036868859 |
| Q64378 | Fkbp5   | Peptidyl-prolyl cis-trans isomerase FKBP5                                           | 520.51  | 25.44 | 50966  | 10 | 0.01150721 | 1.501077689 | 0.091258563 | 4.5235623e-183 | 2.341884e-231  | 0.036924385 |
| Q8BGR9 | Ublcp1  | Ubiquitin-like domain-containing CTD phosphatase 1                                  | 96.65   | 6.6   | 36837  | 2  | 0.01156591 | 2.866447909 | 0.091470032 | 1.3912375e-182 | 9.4517753e-231 | 0.037009948 |
| Q9QZE7 | Tsnax   | Translin-associated protein X                                                       | 278.92  | 21.03 | 32926  | 5  | 0.01164503 | 2.273382889 | 0.091605462 | 4.2727901e-182 | 3.8027564e-230 | 0.037064745 |
| P97823 | Lypl1   | Acyl-protein thioesterase 1                                                         | 243.92  | 26.52 | 24688  | 4  | 0.01169479 | 2.054726799 | 0.091605462 | 1.3104225e-181 | 1.5240153e-229 | 0.037064745 |
| Q8VEE4 | Rpa1    | Replication protein A 70 kDa DNA-binding subunit                                    | 669.48  | 23.76 | 69037  | 13 | 0.01169795 | 1.264874467 | 0.091605462 | 4.0132904e-181 | 6.0908645e-229 | 0.037064745 |
| Q5U317 | Fip11   | Pre-mRNA 3'-end-processing factor FIP1                                              | 292.11  | 14.55 | 60188  | 5  | 0.01171138 | 0.634148817 | 0.091605462 | 1.2273805e-180 | 2.431842e-228  | 0.037064745 |
| Q8CIG8 | Prmt5   | Protein arginine N-methyltransferase 5                                              | 73.3    | 2.04  | 72680  | 1  | 0.01185884 | 3.938578137 | 0.091757671 | 3.748411e-180  | 9.6959317e-228 | 0.037126331 |
| P41542 | Uso1    | General vesicular transport factor p115                                             | 208.86  | 6.26  | 107162 | 5  | 0.011886   | 2.95517781  | 0.091757671 | 1.1431533e-179 | 3.8411457e-227 | 0.037126331 |
| Q4KM65 | Nudt21  | Cleavage and polyadenylation specificity factor subunit 5                           | 384.5   | 36.12 | 26240  | 7  | 0.011891   | 1.312374541 | 0.091757671 | 3.481376e-179  | 1.5188456e-226 | 0.037126331 |
| Q9JJU8 | Sh3bgrl | SH3 domain-binding glutamic acid-rich-like protein                                  | 362.73  | 70.18 | 12811  | 6  | 0.01193199 | 1.597588254 | 0.091757671 | 1.0587333e-178 | 5.9993724e-226 | 0.037126331 |
| Q3ZAV8 | Edc4    | Enhancer of mRNA-decapping protein 4                                                | 254.96  | 5.12  | 152596 | 4  | 0.01198324 | 2.365578003 | 0.091757671 | 3.2152244e-178 | 2.3640588e-225 | 0.037126331 |
| Q9WTM5 | Ruvb12  | RuvB-like 2                                                                         | 874.24  | 33.26 | 51113  | 15 | 0.01198862 | 1.194342529 | 0.091757671 | 9.7504588e-178 | 9.2898825e-225 | 0.037126331 |
| Q9R1P4 | Psm1    | Proteasome subunit alpha type-1                                                     | 707.76  | 64.64 | 29547  | 15 | 0.01199302 | 1.708186353 | 0.091757671 | 2.9527575e-177 | 3.646665e-224  | 0.037126331 |
| P85972 | Vcl     | Vinculin                                                                            | 822.95  | 16.79 | 116615 | 16 | 0.01199627 | 1.974844077 | 0.091757671 | 8.9293412e-177 | 1.4299807e-223 | 0.037126331 |
| O89023 | Tpp1    | Tripeptidyl-peptidase 1                                                             | 296.49  | 13.7  | 61342  | 5  | 0.01202099 | 1.5266068   | 0.091757671 | 2.6964967e-176 | 5.6018385e-223 | 0.037126331 |
| Q68FD5 | Cltc    | Clathrin heavy chain 1                                                              | 4125.47 | 48.42 | 191557 | 66 | 0.01207601 | 1.334471014 | 0.091757671 | 8.1314718e-176 | 2.1905623e-222 | 0.037126331 |
| Q8C0M9 | Asrg11  | Isoaspartyl peptidase/L-asparaginase                                                | 169.81  | 11.04 | 33950  | 3  | 0.01209901 | 2.237811035 | 0.091757671 | 2.4486524e-175 | 8.5413628e-222 | 0.037126331 |
| Q8BFY9 | Tnpo1   | Transportin-1                                                                       | 422.59  | 8.91  | 102357 | 8  | 0.01215523 | 2.141972895 | 0.091757671 | 7.3633214e-175 | 3.3247087e-221 | 0.037126331 |
| Q62465 | Vat1    | Synaptic vesicle membrane protein VAT-1 homolog                                     | 696.42  | 37.19 | 43097  | 12 | 0.01216195 | 1.65079689  | 0.091757671 | 2.211103e-174  | 1.2903718e-220 | 0.037126331 |
| Q9D172 | Gatd3a  | Glutamine amidotransferase-like class 1 domain-containing protein 3A, mitochondrial | 59.06   | 9.4   | 28090  | 2  | 0.01218079 | 2.570187868 | 0.091757671 | 6.6302925e-174 | 5.002514e-220  | 0.037126331 |
| O70593 | Sgta    | Small glutamine-rich tetratricopeptide repeat-containing protein alpha              | 316.14  | 23.89 | 34157  | 6  | 0.01224964 | 1.779851008 | 0.091808029 | 1.9853855e-173 | 1.9363513e-219 | 0.037146706 |
| P97369 | Ncf4    | Neutrophil cytosol factor 4                                                         | 670.34  | 50.74 | 38707  | 12 | 0.01227834 | 1.241051812 | 0.091808029 | 5.9367041e-173 | 7.470096e-219  | 0.037146706 |
| Q8R180 | Ero1a   | ERO1-like protein alpha                                                             | 441.46  | 17.89 | 54084  | 8  | 0.01229108 | 2.394539632 | 0.091808029 | 1.772696e-172  | 2.8763455e-218 | 0.037146706 |
| Q922D8 | Mthfd1  | C-1-tetrahydrofolate synthase, cytoplasmic                                          | 1267.38 | 30.05 | 101200 | 25 | 0.01233698 | 1.611785678 | 0.091808029 | 5.2858078e-172 | 1.1060527e-217 | 0.037146706 |
| Q9R0N0 | Galk1   | Galactokinase                                                                       | 443.6   | 24.49 | 42295  | 9  | 0.01236571 | 2.012931414 | 0.091808029 | 1.5738982e-171 | 4.2424869e-217 | 0.037146706 |
| O70469 | Dok2    | Docking protein 2                                                                   | 161.91  | 9.22  | 45522  | 3  | 0.01238042 | 2.768288342 | 0.091808029 | 4.6798293e-171 | 1.6242056e-216 | 0.037146706 |
| P97379 | G3bp2   | Ras GTPase-activating protein-binding protein 2                                     | 349.52  | 11.83 | 54088  | 5  | 0.01244465 | 1.873710079 | 0.092045271 | 1.3895412e-170 | 6.2094423e-216 | 0.037242697 |



|         |         |                                                                                 |         |       |        |    |            |             |             |                |                |             |
|---------|---------|---------------------------------------------------------------------------------|---------|-------|--------|----|------------|-------------|-------------|----------------|----------------|-------------|
| Q11011  | Npepps  | Puromycin-sensitive aminopeptidase                                              | 553.2   | 11.3  | 103325 | 10 | 0.01258513 | 1.749980169 | 0.092285329 | 4.1200338e-170 | 2.3664737e-215 | 0.037339828 |
| Q8BFR5  | Tufm    | Elongation factor Tu, mitochondrial                                             | 851.21  | 41.81 | 49508  | 15 | 0.01260241 | 1.230423031 | 0.092285329 | 1.2198826e-169 | 8.9670035e-215 | 0.037339828 |
| P27870  | Vav1    | Proto-oncogene vav                                                              | 383.45  | 11.12 | 98137  | 8  | 0.01266437 | 1.555961195 | 0.092285329 | 3.6068085e-169 | 3.3927542e-214 | 0.037339828 |
| Q8CIE6  | Copa    | Coatomer subunit alpha                                                          | 1255.51 | 23.2  | 138432 | 23 | 0.01269316 | 1.465844437 | 0.092285329 | 1.0649173e-168 | 1.2798251e-213 | 0.037339828 |
| D3ZBE5  | Nek7    | Serine/threonine-protein kinase Nek7                                            | 60.98   | 7.95  | 34529  | 2  | 0.01269672 | 2.216304485 | 0.092285329 | 3.1397593e-168 | 4.8188052e-213 | 0.037339828 |
| Q3THS6  | Mat2a   | S-adenosylmethionine synthase isoform type-2                                    | 561.82  | 31.9  | 43689  | 12 | 0.01270424 | 1.940513197 | 0.092285329 | 9.2440952e-168 | 1.8125631e-212 | 0.037339828 |
| Q32PX2  | Aimp2   | Aminoacyl tRNA synthase complex-interacting multifunctional protein 2           | 201.97  | 16.88 | 35443  | 4  | 0.01271971 | 1.605620431 | 0.092285329 | 2.7178155e-167 | 6.8100881e-212 | 0.037339828 |
| P53811  | Pitpnb  | Phosphatidylinositol transfer protein beta isoform                              | 221.46  | 27.68 | 31487  | 6  | 0.01276518 | 1.971403754 | 0.092285329 | 7.9792668e-167 | 2.5550529e-211 | 0.037339828 |
| O54988  | Slk     | STE20-like serine/threonine-protein kinase                                      | 481.02  | 11.03 | 141457 | 9  | 0.01276802 | 1.724881252 | 0.092285329 | 2.3393401e-166 | 9.5629725e-211 | 0.037339828 |
| O88685  | Psmc3   | 26S proteasome regulatory subunit 6A                                            | 957.78  | 43.89 | 49549  | 17 | 0.01287581 | 1.390835914 | 0.092829409 | 6.8487453e-166 | 3.5756909e-210 | 0.037559969 |
| Q61699  | Hsph1   | Heat shock protein 105 kDa                                                      | 570.99  | 15.27 | 96407  | 10 | 0.01292059 | 2.120316466 | 0.092917603 | 2.0022388e-165 | 1.3309634e-209 | 0.037595654 |
| P63323  | Rps12   | 40S ribosomal protein S12                                                       | 632.64  | 62.88 | 14525  | 10 | 0.01296183 | 1.655544558 | 0.092979938 | 5.8453143e-165 | 4.9424071e-209 | 0.037620875 |
| Q6PDPV7 | Rpl10   | 60S ribosomal protein L10                                                       | 531.95  | 41.12 | 24604  | 10 | 0.01305406 | 1.312267926 | 0.093356625 | 1.7040679e-164 | 1.8311808e-208 | 0.037773288 |
| Q9WUA3  | Pfkp    | ATP-dependent 6-phosphofructokinase, platelet type                              | 1615    | 44.9  | 85455  | 23 | 0.01307974 | 1.59650442  | 0.093356625 | 4.9608137e-164 | 6.7579435e-208 | 0.037773288 |
| Q9CQQ8  | Lsm7    | U6 snRNA-associated Sm-like protein LSm7                                        | 97.25   | 15.53 | 11636  | 2  | 0.01316136 | 1.279068842 | 0.093366749 | 1.4421347e-163 | 2.4897088e-207 | 0.037773384 |
| P98078  | Dab2    | Disabled homolog 2                                                              | 1050.78 | 29.63 | 82312  | 15 | 0.0131615  | 1.620524025 | 0.093366749 | 4.1864462e-163 | 9.1398366e-207 | 0.037773384 |
| P25113  | Pgam1   | Phosphoglycerate mutase 1                                                       | 1504.19 | 77.17 | 28832  | 22 | 0.01317926 | 1.57999024  | 0.093366749 | 1.2135899e-162 | 3.352315e-206  | 0.037773384 |
| Q62189  | Snrpa   | U1 small nuclear ribonucleoprotein A                                            | 361.1   | 31.01 | 31835  | 8  | 0.01333266 | 0.811117624 | 0.093848351 | 3.5130556e-162 | 1.2277708e-205 | 0.037972246 |
| Q9JHU9  | Isyna1  | Inositol-3-phosphate synthase 1                                                 | 818.03  | 29.62 | 60932  | 14 | 0.01336193 | 1.675489287 | 0.093848351 | 1.0155111e-161 | 4.4704502e-205 | 0.037972246 |
| O08618  | Prpsap2 | Phosphoribosyl pyrophosphate synthase-associated protein 2                      | 179.36  | 11.92 | 40867  | 3  | 0.01336708 | 1.794322967 | 0.093848351 | 2.931371e-161  | 1.624787e-204  | 0.037972246 |
| Q64701  | Rb11    | Retinoblastoma-like protein 1                                                   | 57.19   | 0.85  | 119456 | 1  | 0.01337873 | 2.888143686 | 0.093848351 | 8.4497389e-161 | 5.8991479e-204 | 0.037972246 |
| Q91YT0  | Ndufv1  | NADH dehydrogenase [ubiquinone] flavoprotein 1, mitochondrial                   | 609.27  | 31.47 | 50834  | 9  | 0.01355862 | 0.755408764 | 0.094635108 | 2.4322158e-160 | 2.1391371e-203 | 0.038290578 |
| P29452  | Casp1   | Caspase-1                                                                       | 368.14  | 20.4  | 45640  | 7  | 0.0135596  | 1.73820356  | 0.094635108 | 6.9911263e-160 | 7.7059409e-203 | 0.038290578 |
| Q68FL4  | Ahcy12  | Putative adenosylhomocysteinase 3                                               | 238.46  | 7.01  | 66899  | 5  | 0.01365973 | 2.762220773 | 0.094635108 | 2.006681e-159  | 2.7734487e-202 | 0.038290578 |
| Q80UM3  | Naa15   | N-alpha-acetyltransferase 15, NatA auxiliary subunit                            | 438.56  | 14.1  | 100961 | 9  | 0.01366705 | 2.038778329 | 0.094635108 | 5.7516912e-159 | 9.9419302e-202 | 0.038290578 |
| O35381  | Anp32a  | Acidic leucine-rich nuclear phosphoprotein 32 family member A                   | 353.18  | 21.86 | 28538  | 6  | 0.01368392 | 1.845435835 | 0.094635108 | 1.6462612e-158 | 3.5599444e-201 | 0.038290578 |
| P24547  | Impdh2  | Inosine-5'-monophosphate dehydrogenase 2                                        | 1327.83 | 39.49 | 55815  | 21 | 0.01368977 | 1.77809452  | 0.094635108 | 4.7053055e-158 | 1.2729396e-200 | 0.038290578 |
| P08030  | Aprt    | Adenine phosphoribosyltransferase                                               | 923.16  | 78.89 | 19724  | 14 | 0.01384766 | 1.688244546 | 0.095335018 | 1.3429588e-157 | 4.5468771e-200 | 0.038573771 |
| Q9EQK5  | Mvp     | Major vault protein                                                             | 1635.94 | 43.32 | 95924  | 27 | 0.0138578  | 1.269221284 | 0.095335018 | 3.8275709e-157 | 1.6147997e-199 | 0.038573771 |
| Q8K1J6  | Trmt1   | CCA tRNA nucleotidyltransferase 1, mitochondrial                                | 112.86  | 6.45  | 49895  | 3  | 0.01389233 | 3.060591958 | 0.095342812 | 1.0893549e-156 | 5.7280991e-199 | 0.038576925 |
| P60892  | Prps1   | Ribose-phosphate pyrophosphokinase 1                                            | 692     | 38.99 | 34834  | 14 | 0.01395034 | 1.557393981 | 0.095511309 | 3.096001e-156  | 2.0279824e-198 | 0.038645101 |
| D2XV59  | Gtbp1   | GTP-binding protein 1                                                           | 230.46  | 10.01 | 72489  | 5  | 0.01405486 | 2.186258029 | 0.095750572 | 8.7865463e-156 | 7.1609472e-198 | 0.03874191  |
| O35344  | Kpna3   | Importin subunit alpha-4                                                        | 219.47  | 9.21  | 57773  | 3  | 0.01405618 | 1.569498036 | 0.095750572 | 2.4901221e-155 | 2.5183897e-197 | 0.03874191  |
| Q8R5A3  | Apbb1ip | Amyloid beta A4 precursor protein-binding family B member 1-interacting protein | 68.3    | 5.07  | 74319  | 2  | 0.01409451 | 4.370194673 | 0.095750572 | 7.0470661e-155 | 8.8487196e-197 | 0.03874191  |
| Q8CI51  | Pdlim5  | PDZ and LIM domain protein 5                                                    | 341.34  | 16.24 | 63299  | 7  | 0.01411944 | 1.940057445 | 0.095750572 | 1.991504e-154  | 3.1028349e-196 | 0.03874191  |
| P63242  | Eif5a   | Eukaryotic translation initiation factor 5A-1                                   | 901.79  | 69.48 | 16832  | 14 | 0.01420672 | 1.604149053 | 0.095851823 | 5.6200359e-154 | 1.0862596e-195 | 0.038782877 |
| Q91Y10  | Asl     | Argininosuccinate lyase                                                         | 446.52  | 23.28 | 51739  | 9  | 0.01421357 | 2.57123115  | 0.095851823 | 1.5837329e-153 | 3.7896412e-195 | 0.038782877 |
| Q8CHP8  | Pgp     | Glycerol-3-phosphate phosphatase                                                | 436.34  | 35.2  | 34541  | 8  | 0.01425761 | 2.144268351 | 0.095851823 | 4.4566619e-153 | 1.3206755e-194 | 0.038782877 |
| Q99M31  | Hspa14  | Heat shock 70 kDa protein 14                                                    | 198.91  | 10.81 | 54650  | 4  | 0.01426866 | 2.040493303 | 0.095851823 | 1.2523398e-152 | 4.5924901e-194 | 0.038782877 |
| Q9CS42  | Prps2   | Ribose-phosphate pyrophosphokinase 2                                            | 700.74  | 38.05 | 34786  | 13 | 0.01434551 | 1.590754533 | 0.096141871 | 3.5141425e-152 | 1.5950694e-193 | 0.038900234 |
| P70698  | Ctps1   | CTP synthase 1                                                                  | 300.54  | 13.54 | 66682  | 6  | 0.014408   | 1.852979669 | 0.096334544 | 9.8469365e-152 | 5.5226615e-193 | 0.038978192 |
| Q91WU5  | As3mt   | Arsenite methyltransferase                                                      | 146.66  | 13.3  | 41794  | 3  | 0.0145237  | 2.263371546 | 0.096654236 | 2.7552905e-151 | 1.9069692e-192 | 0.039107543 |
| Q80UG5  | Sept9   | Septin-9                                                                        | 280.17  | 15.09 | 65575  | 6  | 0.01458151 | 1.70328967  | 0.096654236 | 7.6987111e-151 | 6.5569121e-192 | 0.039107543 |
| Q9DCH4  | Eif3f   | Eukaryotic translation initiation factor 3 subunit F                            | 516.21  | 24.93 | 37984  | 8  | 0.0145969  | 1.477170618 | 0.096654236 | 2.1480923e-150 | 2.2488107e-191 | 0.039107543 |
| P84078  | Arf1    | ADP-ribosylation factor 1                                                       | 972.12  | 64.64 | 20697  | 14 | 0.01462617 | 1.586575817 | 0.096654236 | 5.9851089e-150 | 7.7026017e-191 | 0.039107543 |
| O08539  | Bin1    | Myc box-dependent-interacting protein 1                                         | 257.22  | 14.12 | 64470  | 5  | 0.01467834 | 1.434624411 | 0.096654236 | 1.6652339e-149 | 2.6337805e-190 | 0.039107543 |
| Q8K2H2  | Otud6b  | Deubiquitinase OTUD6B                                                           | 56.43   | 4.42  | 33758  | 1  | 0.01468648 | 1.646716623 | 0.096654236 | 4.6266052e-149 | 8.9845383e-190 | 0.039107543 |
| Q9JHS3  | Lamtor2 | Ragulator complex protein LAMTOR2                                               | 72.28   | 8.8   | 13480  | 1  | 0.01471845 | 2.850891993 | 0.096654236 | 1.2836113e-148 | 3.0614958e-189 | 0.039107543 |

|        |          |                                                                                   |         |       |        |    |            |             |             |                |                |             |
|--------|----------|-----------------------------------------------------------------------------------|---------|-------|--------|----|------------|-------------|-------------|----------------|----------------|-------------|
| Q9Z1F9 | Uba2     | SUMO-activating enzyme subunit 2                                                  | 895.4   | 44.83 | 70569  | 16 | 0.01479177 | 1.85577346  | 0.096654236 | 3.556218e-148  | 1.0413532e-188 | 0.039107543 |
| O08807 | Prdx4    | Peroxiredoxin-4                                                                   | 450.91  | 46.72 | 31053  | 10 | 0.01479374 | 3.013614596 | 0.096654236 | 9.8384553e-148 | 3.5316816e-188 | 0.039107543 |
| Q8VE47 | Uba5     | Ubiquitin-like modifier-activating enzyme 5                                       | 172.25  | 12.16 | 44790  | 3  | 0.01487708 | 3.093350543 | 0.096654236 | 2.7179974e-147 | 1.1966384e-187 | 0.039107543 |
| Q6PA06 | Atl2     | Atlastin-2                                                                        | 214.69  | 10.29 | 66224  | 5  | 0.01491615 | 2.648799697 | 0.096654236 | 7.4981589e-147 | 4.0415403e-187 | 0.039107543 |
| Q8C0C7 | Farsa    | Phenylalanine--tRNA ligase alpha subunit                                          | 426.86  | 15.94 | 57599  | 9  | 0.01493252 | 1.7222437   | 0.096654236 | 2.0655876e-146 | 1.3623156e-186 | 0.039107543 |
| Q8K1R7 | Nek9     | Serine/threonine-protein kinase Nek9                                              | 179.81  | 5.39  | 107143 | 4  | 0.01496115 | 2.049770643 | 0.096654236 | 5.6821913e-146 | 4.585977e-186  | 0.039107543 |
| Q9DBG5 | Plin3    | Perilipin-3                                                                       | 847.34  | 42.79 | 47262  | 13 | 0.01497033 | 1.591105056 | 0.096654236 | 1.5608863e-145 | 1.5412068e-185 | 0.039107543 |
| Q5DU25 | Iqsec2   | IQ motif and SEC7 domain-containing protein 2                                     | 50.7    | 0.54  | 161787 | 1  | 0.01499547 | 2.714401805 | 0.096654236 | 4.2816357e-145 | 5.173687e-185  | 0.039107543 |
| Q8BQM4 | Heatr3   | HEAT repeat-containing protein 3                                                  | 196.51  | 7.22  | 74305  | 4  | 0.0150015  | 2.420776335 | 0.096654236 | 1.1728194e-144 | 1.7340299e-184 | 0.039107543 |
| P62869 | Elob     | Elongin-B                                                                         | 518.34  | 66.95 | 13170  | 10 | 0.01505218 | 1.989303191 | 0.096654236 | 3.2080075e-144 | 5.8057767e-184 | 0.039107543 |
| Q9R1T2 | Sae1     | SUMO-activating enzyme subunit 1                                                  | 772     | 46.57 | 38620  | 14 | 0.01508876 | 1.790450819 | 0.096654236 | 8.7623856e-144 | 1.9394347e-183 | 0.039107543 |
| Q5PPI1 | Srsf9    | Serine/arginine-rich splicing factor 9                                            | 71.68   | 8.6   | 25498  | 2  | 0.01509905 | 0.574515921 | 0.096654236 | 2.3899674e-143 | 6.466539e-183  | 0.039107543 |
| Q99J77 | Nans     | Sialic acid synthase                                                              | 490.18  | 37.05 | 40024  | 9  | 0.01523056 | 2.097083386 | 0.09727798  | 6.509447e-143  | 2.1535994e-182 | 0.039359918 |
| Q5BJX0 | Ntmt1    | N-terminal Xaa-Pro-Lys N-methyltransferase 1                                      | 54.32   | 3.14  | 25464  | 1  | 0.01528418 | 2.347001052 | 0.097283936 | 1.7704295e-142 | 7.1403059e-182 | 0.039362328 |
| Q922B2 | Dars     | Aspartate--tRNA ligase, cytoplasmic                                               | 1347.24 | 53.09 | 57147  | 25 | 0.01535837 | 1.568211678 | 0.097283936 | 4.8083432e-142 | 2.3618775e-181 | 0.039362328 |
| Q78PY7 | Snd1     | Staphylococcal nuclease domain-containing protein 1                               | 2541.63 | 56.15 | 102088 | 42 | 0.01536156 | 1.395057512 | 0.097283936 | 1.3040507e-141 | 7.7902029e-181 | 0.039362328 |
| P21300 | Akr1b7   | Aldose reductase-related protein 1                                                | 337.12  | 13.92 | 35988  | 7  | 0.0153678  | 1.300217277 | 0.097283936 | 3.5316329e-141 | 2.5669863e-180 | 0.039362328 |
| P05201 | Got1     | Aspartate aminotransferase, cytoplasmic                                           | 924.57  | 44.79 | 46248  | 16 | 0.01548456 | 1.572144793 | 0.097529059 | 9.5507748e-141 | 8.4497807e-180 | 0.039461508 |
| P50518 | Atp6v1e1 | V-type proton ATPase subunit E 1                                                  | 463.81  | 41.59 | 26157  | 8  | 0.01548741 | 1.258137771 | 0.097529059 | 2.5791909e-140 | 2.7703277e-179 | 0.039461508 |
| Q8BPX9 | Slc15a3  | Solute carrier family 15 member 3                                                 | 360.59  | 14.36 | 64051  | 7  | 0.01552365 | 1.469393289 | 0.097529059 | 6.955208e-140  | 9.0741153e-179 | 0.039461508 |
| Q91WQ3 | Yars     | Tyrosine--tRNA ligase, cytoplasmic                                                | 429.69  | 22.92 | 59105  | 10 | 0.01554316 | 1.682643346 | 0.097529059 | 1.8729163e-139 | 2.9667379e-178 | 0.039461508 |
| P49138 | Mapkapk2 | MAP kinase-activated protein kinase 2                                             | 166.15  | 10.88 | 44050  | 4  | 0.0157038  | 1.737699981 | 0.097801198 | 5.0362597e-139 | 9.6861028e-178 | 0.039571619 |
| Q8VBT6 | Apobr    | Apolipoprotein B receptor                                                         | 546.98  | 14.65 | 102705 | 12 | 0.01571384 | 1.622287044 | 0.097801198 | 1.3523193e-138 | 3.1463218e-177 | 0.039571619 |
| Q8C052 | Map1s    | Microtubule-associated protein 1S                                                 | 144.55  | 3.8   | 102939 | 3  | 0.01572284 | 2.093003653 | 0.097801198 | 3.6260322e-138 | 1.0208556e-176 | 0.039571619 |
| Q4KLF8 | Arpc5    | Actin-related protein 2/3 complex subunit 5                                       | 252.9   | 16.56 | 16320  | 3  | 0.01572356 | 1.29619099  | 0.097801198 | 9.7087925e-138 | 3.3085961e-176 | 0.039571619 |
| Q91XU1 | Qki      | Protein quaking                                                                   | 278.1   | 23.17 | 37643  | 5  | 0.01583223 | 1.438488108 | 0.098233359 | 2.5958514e-137 | 1.0713579e-175 | 0.039746477 |
| P61965 | Wdr5     | WD repeat-containing protein 5                                                    | 83.17   | 4.19  | 36588  | 1  | 0.01586185 | 2.711177705 | 0.098233359 | 6.9306719e-137 | 3.4563624e-175 | 0.039746477 |
| Q80YW0 | Cyth4    | Cytohesin-4                                                                       | 46.49   | 2.54  | 45285  | 1  | 0.01592088 | 2.583297996 | 0.098385516 | 1.8477859e-136 | 1.1132475e-174 | 0.039808042 |
| Q8C0L6 | Paox     | Peroxisomal N(1)-acetyl-spermine/spermidine oxidase                               | 82.37   | 3.17  | 55447  | 1  | 0.01609777 | 2.590706516 | 0.099263791 | 4.9193605e-136 | 3.5770442e-174 | 0.040163403 |
| Q6P3D0 | Nudt16   | U8 snoRNA-decapping enzyme                                                        | 115.72  | 11.79 | 21825  | 2  | 0.01614746 | 2.508154119 | 0.099355572 | 1.3078147e-135 | 1.1431864e-173 | 0.040200539 |
| P80315 | Cct4     | T-complex protein 1 subunit delta                                                 | 2112.64 | 60.67 | 58066  | 29 | 0.01635686 | 1.544082576 | 0.10036827  | 3.471876e-135  | 3.6457419e-173 | 0.04061029  |
| P50543 | S100a11  | Protein S100-A11                                                                  | 219.21  | 40.82 | 11083  | 4  | 0.01638235 | 1.452388593 | 0.10036827  | 9.2037014e-135 | 1.1555692e-172 | 0.04061029  |
| Q920A5 | Scepl    | Retinoid-inducible serine carboxypeptidase                                        | 331.76  | 19.03 | 50965  | 7  | 0.01670195 | 1.898957588 | 0.10172341  | 2.4363576e-134 | 3.6572596e-172 | 0.041158595 |
| Q9CWM4 | Pfdn1    | Prefoldin subunit 1                                                               | 102.01  | 15.57 | 14255  | 2  | 0.01672014 | 1.809105217 | 0.10172341  | 6.4402037e-134 | 1.1474296e-171 | 0.041158595 |
| Q8R1Q8 | Dync1li1 | Cytoplasmic dynein 1 light intermediate chain 1                                   | 437.14  | 22.18 | 56614  | 7  | 0.0167581  | 1.738242709 | 0.10172341  | 1.6999578e-133 | 3.5952904e-171 | 0.041158595 |
| Q64261 | Cdk6     | Cyclin-dependent kinase 6                                                         | 254.71  | 26.69 | 37028  | 6  | 0.01675877 | 2.179170596 | 0.10172341  | 4.4808096e-133 | 1.1245301e-170 | 0.041158595 |
| Q9D0R2 | Tars     | Threonine--tRNA ligase, cytoplasmic                                               | 1509.11 | 42.52 | 83356  | 27 | 0.01678169 | 1.887279449 | 0.10172341  | 1.1793821e-132 | 3.5142306e-170 | 0.041158595 |
| Q9JMH9 | Myo18a   | Unconventional myosin-XVIIIa                                                      | 226.5   | 3.07  | 232755 | 5  | 0.01682722 | 2.144863053 | 0.10178327  | 3.0997893e-132 | 1.0966724e-169 | 0.041182816 |
| Q5U211 | Snx3     | Sorting nexin-3                                                                   | 327.21  | 52.47 | 18762  | 6  | 0.01690616 | 1.498882594 | 0.10187098  | 8.1355936e-132 | 3.4156593e-169 | 0.041218304 |
| Q8R317 | Ubqln1   | Ubiquilin-1                                                                       | 106.21  | 5.5   | 61976  | 2  | 0.01691308 | 1.97832078  | 0.10187098  | 2.1321887e-131 | 1.0609062e-168 | 0.041218304 |
| Q9Z0N1 | Eif2s3x  | Eukaryotic translation initiation factor 2 subunit 3, X-linked                    | 1076    | 43.64 | 51065  | 18 | 0.01695843 | 1.346701937 | 0.10192911  | 5.5800903e-131 | 3.291817e-168  | 0.041241824 |
| Q62318 | Trim28   | Transcription intermediary factor 1-beta                                          | 1463.95 | 42.45 | 88847  | 24 | 0.01700383 | 1.211302134 | 0.10198728  | 1.4582631e-130 | 1.0194169e-167 | 0.041265363 |
| Q8CAY6 | Acat2    | Acetyl-CoA acetyltransferase, cytosolic                                           | 363.97  | 27.46 | 41298  | 6  | 0.01714253 | 1.653123608 | 0.1026036   | 3.8054803e-130 | 3.1508408e-167 | 0.041514734 |
| P11983 | Tcp1     | T-complex protein 1 subunit alpha                                                 | 2145.54 | 64.57 | 60449  | 31 | 0.01718228 | 1.524304824 | 0.1026264   | 9.9165789e-130 | 9.6985155e-167 | 0.04152396  |
| Q9D8S9 | Bola1    | BolA-like protein 1                                                               | 105.43  | 17.52 | 14379  | 3  | 0.01750209 | 2.276564568 | 0.10431828  | 2.5804352e-129 | 2.9799395e-166 | 0.042208513 |
| Q8BU30 | Iars     | Isoleucine--tRNA ligase, cytoplasmic                                              | 391.51  | 7.21  | 144271 | 8  | 0.01754628 | 2.069421204 | 0.10436383  | 6.7050585e-129 | 9.08058e-166   | 0.042226945 |
| P24049 | Rpl17    | 60S ribosomal protein L17                                                         | 485.37  | 44.57 | 21397  | 10 | 0.01770633 | 1.605404349 | 0.10509682  | 1.7397651e-128 | 2.761929e-165  | 0.04252352  |
| P36876 | Ppp2r2a  | Serine/threonine-protein phosphatase 2A 55 kDa regulatory subunit B alpha isoform | 410.72  | 18.79 | 51678  | 8  | 0.01778083 | 1.692154946 | 0.10516644  | 4.50772e-128   | 8.3629558e-165 | 0.04255169  |
| Q9Z120 | Mettl1   | tRNA (guanine-N(7)-)-methyltransferase                                            | 51.03   | 5.6   | 30603  | 1  | 0.01779173 | 3.764931821 | 0.10516644  | 1.1662762e-127 | 2.5258644e-164 | 0.04255169  |
| Q01730 | Rsu1     | Ras suppressor protein 1                                                          | 148.7   | 24.19 | 31550  | 3  | 0.01792899 | 2.183149664 | 0.10575882  | 3.0131717e-127 | 7.6205989e-164 | 0.042791376 |
| P54103 | Dnajc2   | DnaJ homolog subfamily C member 2                                                 | 106.76  | 5.64  | 71722  | 2  | 0.01804721 | 2.611222091 | 0.10605204  | 7.773637e-127  | 2.2901565e-163 | 0.042910015 |

|        |         |                                                                                               |         |       |        |    |            |              |            |                |                |             |
|--------|---------|-----------------------------------------------------------------------------------------------|---------|-------|--------|----|------------|--------------|------------|----------------|----------------|-------------|
| O70325 | Gpx4    | Phospholipid hydroperoxide glutathione peroxidase                                             | 95.59   | 11.68 | 22229  | 2  | 0.01806753 | 1.845724761  | 0.10605204 | 2.0026376e-126 | 6.8585847e-163 | 0.042910015 |
| P20108 | Prdx3   | Thioredoxin-dependent peroxide reductase, mitochondrial                                       | 191.54  | 26.46 | 28127  | 4  | 0.01817626 | 1.827315015  | 0.10605204 | 5.1517894e-126 | 2.0513786e-162 | 0.042910015 |
| P23116 | Eif3a   | Eukaryotic translation initiation factor 3 subunit A                                          | 910.71  | 14.21 | 161936 | 19 | 0.01818073 | 1.49489702   | 0.10605204 | 1.3234005e-125 | 6.1157873e-162 | 0.042910015 |
| P29067 | Arrb2   | Beta-arrestin-2                                                                               | 574.04  | 23.17 | 46340  | 10 | 0.01820082 | 1.483095498  | 0.10605204 | 3.3947035e-125 | 1.8216052e-161 | 0.042910015 |
| Q6P5G6 | Ubxn7   | UBX domain-containing protein 7                                                               | 42.95   | 1.93  | 52164  | 1  | 0.01820158 | 2.850994192  | 0.10605204 | 8.6954007e-125 | 5.4187848e-161 | 0.042910015 |
| Q60864 | Stip1   | Stress-induced-phosphoprotein 1                                                               | 1023.65 | 37.57 | 62582  | 19 | 0.01830062 | 1.624422152  | 0.1062936  | 2.2241005e-124 | 6.105676e-160  | 0.043007753 |
| P97287 | Mcl1    | Induced myeloid leukemia cell differentiation protein Mcl-1 homolog                           | 50.22   | 3.93  | 35217  | 1  | 0.0183175  | 1.22658.1127 | 0.1062936  | 5.6806254e-124 | 4.7725762e-160 | 0.043007753 |
| Q3UEB3 | Puf60   | Poly(U)-binding-splicing factor PUF60                                                         | 528.65  | 22.7  | 60249  | 8  | 0.01843193 | 1.273415759  | 0.10670103 | 1.4488208e-123 | 1.4125505e-159 | 0.043172606 |
| P70195 | Psmb7   | Proteasome subunit beta type-7                                                                | 158.8   | 25.27 | 29891  | 4  | 0.01848791 | 1.623977844  | 0.10670103 | 3.6898596e-123 | 4.1669236e-159 | 0.043172606 |
| Q03265 | Atp5f1a | ATP synthase subunit alpha, mitochondrial                                                     | 2770.93 | 62.39 | 59753  | 40 | 0.01852161 | 0.803160514  | 0.10670103 | 9.3838599e-123 | 1.2267068e-158 | 0.043172606 |
| Q62048 | Pea15   | Astrocytic phosphoprotein PEA-15                                                              | 156.7   | 16.92 | 15054  | 3  | 0.01854606 | 3.390208566  | 0.10670103 | 2.3830302e-122 | 3.6056955e-158 | 0.043172606 |
| Q76MZ3 | Ppp2r1a | Serine/threonine-protein phosphatase 2A 65 kDa regulatory subunit A alpha isoform             | 1267.77 | 41.77 | 65323  | 20 | 0.01859034 | 1.529566389  | 0.10670103 | 6.0430169e-122 | 1.0583927e-157 | 0.043172606 |
| Q78ZA7 | Nap114  | Nucleosome assembly protein 1-like 4                                                          | 581.64  | 29.87 | 42679  | 8  | 0.01861195 | 1.530202097  | 0.10670103 | 1.530221e-121  | 3.1012054e-157 | 0.043172606 |
| Q63468 | Prpsap1 | Phosphoribosyl pyrophosphate synthase-associated protein 1                                    | 397.12  | 25.84 | 39436  | 7  | 0.01865443 | 1.886034951  | 0.10673023 | 3.8692823e-121 | 9.0750819e-157 | 0.043184419 |
| P62959 | Hint1   | Histidine triad nucleotide-binding protein 1                                                  | 189.29  | 42.06 | 13777  | 4  | 0.01896049 | 2.158890302  | 0.10818261 | 9.7697282e-121 | 2.6510295e-156 | 0.043772073 |
| Q505F5 | Lrrc47  | Leucine-rich repeat-containing protein 47                                                     | 210.41  | 12.39 | 63590  | 5  | 0.01911416 | 1.51930946   | 0.10818261 | 2.4632596e-120 | 7.6881399e-156 | 0.043772073 |
| O54940 | Bnip2   | BCL2/adenovirus E1B 19 kDa protein-interacting protein 2                                      | 69.71   | 7.67  | 37769  | 2  | 0.0191228  | 1.953139721  | 0.10818261 | 6.2017378e-120 | 2.2206679e-155 | 0.043772073 |
| P81799 | Nagk    | N-acetyl-D-glucosamine kinase                                                                 | 56.74   | 2.92  | 37196  | 1  | 0.01914992 | 2.684006207  | 0.10818261 | 1.5591646e-119 | 6.4078109e-155 | 0.043772073 |
| Q9Z0S1 | Bpnt1   | 3'(2'),5'-biphosphate nucleotidase 1                                                          | 407.94  | 30.19 | 33196  | 7  | 0.01921319 | 2.15883069   | 0.10818261 | 3.9142245e-119 | 1.8464336e-154 | 0.043772073 |
| Q61035 | Hars    | Histidine--tRNA ligase, cytoplasmic                                                           | 569.23  | 30.45 | 57432  | 12 | 0.01923937 | 1.753324524  | 0.10818261 | 9.8123846e-119 | 5.3092557e-154 | 0.043772073 |
| Q53UA7 | Taok3   | Serine/threonine-protein kinase TAO3                                                          | 164.73  | 5.01  | 105474 | 4  | 0.01928865 | 1.49265275   | 0.10818261 | 2.4562825e-118 | 1.524548e-153  | 0.043772073 |
| Q99K01 | Pdxdc1  | Pyridoxal-dependent decarboxylase domain-containing protein 1                                 | 76.39   | 2.8   | 87335  | 2  | 0.01928968 | 2.560049129  | 0.10818261 | 6.1398366e-118 | 4.3697004e-153 | 0.043772073 |
| Q62095 | Ddx3y   | ATP-dependent RNA helicase DDX3Y                                                              | 1169.83 | 30.09 | 73428  | 20 | 0.01929652 | 1.386254839  | 0.10818261 | 1.5325333e-117 | 1.2513903e-152 | 0.043772073 |
| Q9JJT0 | Rcl1    | RNA 3'-terminal phosphate cyclase-like protein                                                | 40.41   | 2.14  | 40841  | 1  | 0.01932852 | 2.357062674  | 0.10818261 | 3.8197726e-117 | 3.5802404e-152 | 0.043772073 |
| Q4KLJ8 | Pdcl3   | Phosducin-like protein 3                                                                      | 126.27  | 9.17  | 27699  | 2  | 0.01935911 | 2.218979909  | 0.10818261 | 9.5069106e-117 | 1.0227924e-151 | 0.043772073 |
| Q5XIG8 | Strap   | Serine-threonine kinase receptor-associated protein                                           | 524.02  | 46.57 | 38456  | 8  | 0.01936298 | 2.116043679  | 0.10818261 | 2.3627374e-116 | 2.9176387e-151 | 0.043772073 |
| P29341 | Pabpc1  | Polyadenylate-binding protein 1                                                               | 1989.39 | 60.22 | 70671  | 33 | 0.01941725 | 1.49075881   | 0.10827394 | 5.8636161e-116 | 8.3153148e-151 | 0.043809026 |
| P31750 | Akt1    | RAC-alpha serine/threonine-protein kinase                                                     | 48.16   | 1.67  | 55707  | 1  | 0.01948558 | 2.101212015  | 0.10844313 | 1.4530797e-115 | 2.3653052e-150 | 0.043877481 |
| P97930 | Dtymk   | Thymidylate kinase                                                                            | 129.43  | 16.04 | 23915  | 3  | 0.01955781 | 2.75423001   | 0.10863336 | 3.5957299e-115 | 6.713305e-150  | 0.043954449 |
| Q9R1J0 | Nsdhl   | Sterol-4-alpha-carboxylate 3-dehydrogenase, decarboxylating                                   | 96.75   | 8.29  | 40686  | 2  | 0.01960483 | 1.725257875  | 0.1086831  | 8.8850163e-115 | 1.9010577e-149 | 0.043974576 |
| Q6Y7W8 | Gigyf2  | GRB10-interacting GYF protein 2                                                               | 200.37  | 5.58  | 149193 | 4  | 0.01967332 | 1.972405634  | 0.10885139 | 2.1923141e-114 | 5.3738384e-149 | 0.044042667 |
| Q8K2Z4 | Ncapd2  | Condensin complex subunit 1                                                                   | 266.42  | 6.03  | 155665 | 6  | 0.01972548 | 1.877431376  | 0.10888844 | 5.4015771e-114 | 1.5157269e-148 | 0.044057659 |
| O08547 | Sec22b  | Vesicle-trafficking protein SEC22b                                                            | 539.67  | 43.72 | 24741  | 9  | 0.01976658 | 1.153186636  | 0.10888844 | 1.3289586e-113 | 4.2672374e-148 | 0.044057659 |
| Q9D1A2 | Cndp2   | Cytosolic non-specific dipeptidase                                                            | 693.95  | 35.37 | 52767  | 13 | 0.01983001 | 1.697055812  | 0.10888844 | 3.2649403e-113 | 1.199384e-147  | 0.044057659 |
| Q9Z0R6 | Itsn2   | Intersectin-2                                                                                 | 44.16   | 0.72  | 188908 | 1  | 0.01983257 | 2.514512935  | 0.10888844 | 8.0096181e-113 | 3.3640776e-147 | 0.044057659 |
| Q9CRB9 | Chchd3  | MICOS complex subunit Mic19                                                                   | 349.08  | 19.82 | 26335  | 6  | 0.01990358 | 0.746771043  | 0.10906858 | 1.9620993e-112 | 9.4273307e-147 | 0.044130547 |
| Q3U5F4 | Yrdc    | YrdC domain-containing protein, mitochondrial                                                 | 54.49   | 5     | 29454  | 1  | 0.02009463 | 1.26987.4061 | 0.10978761 | 4.7995728e-112 | 2.6360023e-146 | 0.044421477 |
| P42227 | Stat3   | Signal transducer and activator of transcription 3                                            | 81.04   | 4.16  | 88054  | 2  | 0.02011297 | 1.91432035   | 0.10978761 | 1.1723478e-111 | 7.3372407e-146 | 0.044421477 |
| O88844 | Idh1    | Isocitrate dehydrogenase [NADP] cytoplasmic                                                   | 804.68  | 35.27 | 46674  | 14 | 0.02018182 | 1.723931528  | 0.10978761 | 2.85945e-111   | 2.0398803e-145 | 0.044421477 |
| Q9Z2Y8 | Plpbbp  | Pyridoxal phosphate homeostasis protein                                                       | 82.71   | 4.74  | 30049  | 1  | 0.02019238 | 3.726753885  | 0.10978761 | 6.9643487e-111 | 5.6590133e-145 | 0.044421477 |
| Q91YT7 | Ythdf2  | YTH domain-containing family protein 2                                                        | 163.47  | 5.53  | 62280  | 3  | 0.02022707 | 1.794045381  | 0.10978761 | 1.6937539e-110 | 1.5682917e-144 | 0.044421477 |
| Q9CWX9 | Atic    | Bifunctional purine biosynthesis protein PURH                                                 | 2010.74 | 67.74 | 64217  | 32 | 0.02030211 | 1.632426024  | 0.1099858  | 4.1133128e-110 | 4.3397285e-144 | 0.044501666 |
| Q8VE10 | Naa40   | N-alpha-acetyltransferase 40                                                                  | 69.45   | 5.06  | 27229  | 1  | 0.02045268 | 1.987512418  | 0.11045439 | 9.9748103e-110 | 1.1981615e-144 | 0.044691261 |
| Q9CR00 | Psmd9   | 26S proteasome non-ATPase regulatory subunit 9                                                | 49.21   | 5.41  | 24720  | 1  | 0.02046598 | 3.19175454   | 0.11045439 | 2.4153989e-109 | 3.2958681e-143 | 0.044691261 |
| O54941 | Smarce1 | SWI/SNF-related matrix-associated actin-dependent regulator of chromatin subfamily E member 1 | 80.67   | 5.6   | 46638  | 2  | 0.02059125 | 2.171841029  | 0.11073379 | 5.8404222e-109 | 9.056371e-143  | 0.04480431  |



|        |         |                                                              |         |       |        |    |            |             |            |                |                |             |
|--------|---------|--------------------------------------------------------------|---------|-------|--------|----|------------|-------------|------------|----------------|----------------|-------------|
| P97494 | Gclc    | Glutamate--cysteine ligase catalytic subunit                 | 249.43  | 10.36 | 72571  | 5  | 0.02065185 | 2.032887831 | 0.11073379 | 1.4101672e-108 | 2.4806082e-142 | 0.04480431  |
| P49186 | Mapk9   | Mitogen-activated protein kinase 9                           | 110.91  | 4.96  | 48017  | 2  | 0.02072695 | 3.207386083 | 0.11073379 | 3.3999127e-108 | 6.781271e-142  | 0.04480431  |
| Q9ERS5 | Plekha2 | Pleckstrin homology domain-containing family A member 2      | 91.66   | 5.65  | 47380  | 2  | 0.02074058 | 2.193345366 | 0.11073379 | 8.1853186e-108 | 1.8496873e-141 | 0.04480431  |
| P80313 | Cct7    | T-complex protein 1 subunit eta                              | 2365.11 | 69.49 | 59652  | 36 | 0.02074624 | 1.604942623 | 0.11073379 | 1.967768e-107  | 5.0398236e-141 | 0.04480431  |
| Q9QYJ3 | Dnajb1  | DnaJ homolog subfamily B member 1                            | 217.97  | 15.59 | 38167  | 4  | 0.02077183 | 2.262991641 | 0.11073379 | 4.7237021e-107 | 1.3719095e-140 | 0.04480431  |
| Q8R0H9 | Gga1    | ADP-ribosylation factor-binding protein GGA1                 | 176.33  | 7.56  | 69972  | 4  | 0.02078925 | 1.96944561  | 0.11073379 | 1.1322994e-106 | 3.7296536e-140 | 0.04480431  |
| O35127 | Grccl0  | Protein C10                                                  | 38.07   | 14.29 | 13194  | 1  | 0.02087886 | 10.35366153 | 0.11100398 | 2.710254e-106  | 1.0127672e-139 | 0.044913633 |
| P51855 | Gss     | Glutathione synthetase                                       | 236.54  | 14.14 | 52247  | 4  | 0.02093064 | 1.561203631 | 0.11107245 | 6.4778149e-106 | 2.743307e-139  | 0.044941339 |
| Q8BHG1 | Nrdc    | Nardilysin                                                   | 339.35  | 7.24  | 132891 | 6  | 0.02102551 | 2.278538114 | 0.11130656 | 1.5460257e-105 | 7.4176449e-139 | 0.045036061 |
| Q99JF8 | Psip1   | PC4 and SFRS1-interacting protein                            | 373.52  | 17.23 | 59697  | 7  | 0.02109551 | 0.837239152 | 0.11130656 | 3.6844641e-105 | 2.0005366e-138 | 0.045036061 |
| Q99KQ4 | Nampt   | Nicotinamide phosphoribosyltransferase                       | 468.5   | 22.81 | 55447  | 9  | 0.02113686 | 2.159531889 | 0.11130656 | 8.7680144e-105 | 5.3841251e-138 | 0.045036061 |
| Q8K2I4 | Manba   | Beta-mannosidase                                             | 285.63  | 6.6   | 100831 | 6  | 0.02114637 | 2.586377762 | 0.11130656 | 2.0835181e-104 | 1.4467653e-137 | 0.045036061 |
| Q9WVA4 | Tagln2  | Transgelin-2                                                 | 1756.11 | 79.4  | 22395  | 24 | 0.02116969 | 1.408230544 | 0.11130656 | 4.9438156e-104 | 3.8836865e-137 | 0.045036061 |
| Q9WUA2 | Farsb   | Phenylalanine--tRNA ligase beta subunit                      | 563.32  | 21.9  | 65697  | 12 | 0.02127068 | 1.55805299  | 0.11163199 | 1.1713751e-103 | 1.0412266e-136 | 0.045167734 |
| Q6BBI8 | Ufc1    | Ubiquitin-fold modifier-conjugating enzyme 1                 | 102.15  | 28.14 | 19492  | 3  | 0.02137967 | 1.792091929 | 0.11199807 | 2.7713944e-103 | 2.7841905e-136 | 0.045315855 |
| P0C0A1 | Vps25   | Vacuolar protein-sorting-associated protein 25               | 121.19  | 21.02 | 20762  | 3  | 0.02151336 | 2.219872223 | 0.11233848 | 6.5474032e-103 | 7.4241873e-136 | 0.045453591 |
| P28740 | Kif2a   | Kinesin-like protein KIF2A                                   | 116.47  | 3.4   | 79756  | 2  | 0.0215449  | 2.67771205  | 0.11233848 | 1.5445717e-102 | 1.9733867e-135 | 0.045453591 |
| A1L314 | Mpeg1   | Macrophage-expressed gene 1 protein                          | 498.09  | 19.21 | 78390  | 11 | 0.02156269 | 1.54743823  | 0.11233848 | 3.6384392e-102 | 5.2380973e-135 | 0.045453591 |
| Q91YR9 | Ptgr1   | Prostaglandin reductase 1                                    | 402.74  | 27.36 | 35560  | 8  | 0.02186233 | 1.740165592 | 0.11369209 | 8.55835e-102   | 1.3887936e-134 | 0.046001276 |
| Q921M7 | Fam49b  | Protein FAM49B                                               | 700.82  | 35.49 | 36776  | 11 | 0.02205364 | 1.663469164 | 0.11438051 | 2.0101695e-101 | 3.6599815e-134 | 0.04627982  |
| Q80U87 | Usp8    | Ubiquitin carboxyl-terminal hydrolase 8                      | 305.92  | 7.96  | 122611 | 7  | 0.02209117 | 1.807193222 | 0.11438051 | 4.7145781e-101 | 9.6058418e-134 | 0.04627982  |
| Q5U3K5 | Rab16   | Rab-like protein 6                                           | 54.02   | 1.52  | 79831  | 1  | 0.0221149  | 2.483222434 | 0.11438051 | 1.1041303e-100 | 2.5174276e-133 | 0.04627982  |
| Q3V1V3 | Esf1    | ESF1 homolog                                                 | 48.98   | 1.42  | 98048  | 1  | 0.02223978 | 1.959103411 | 0.11471662 | 2.582052e-100  | 6.5894004e-133 | 0.046415816 |
| P62482 | Kcnab2  | Voltage-gated potassium channel subunit beta-2               | 227.05  | 22.62 | 41021  | 5  | 0.02226025 | 2.333396836 | 0.11471662 | 6.0294351e-100 | 1.7197219e-132 | 0.046415816 |
| P80317 | Cct6a   | T-complex protein 1 subunit zeta                             | 1456.67 | 53.3  | 58004  | 26 | 0.02240464 | 1.474007851 | 0.11525271 | 1.405902e-99   | 4.4829474e-132 | 0.046632724 |
| Q9Z2X2 | Psm10   | 26S proteasome non-ATPase regulatory subunit 10              | 82.89   | 3.46  | 25084  | 1  | 0.02246421 | 3.198917576 | 0.11535129 | 3.2734078e-99  | 1.1648197e-131 | 0.046672613 |
| Q9CQ75 | Ndufa2  | NADH dehydrogenase [ubiquinone] 1 alpha subcomplex subunit 2 | 75.5    | 14.14 | 10916  | 1  | 0.02272733 | 0.857934213 | 0.11633405 | 7.6104719e-99  | 3.0211031e-131 | 0.047070247 |
| Q9ERK4 | Cse11   | Exportin-2                                                   | 802.11  | 18.54 | 110455 | 15 | 0.02273709 | 1.420790408 | 0.11633405 | 1.7668078e-98  | 7.7951366e-131 | 0.047070247 |
| O35654 | Pold2   | DNA polymerase delta subunit 2                               | 218.13  | 8.96  | 51355  | 3  | 0.02290647 | 1.866827098 | 0.11699102 | 4.0957467e-98  | 2.0093643e-130 | 0.047336067 |
| Q9QZB7 | Actr10  | Actin-related protein 10                                     | 165.92  | 7.43  | 46208  | 2  | 0.02298739 | 2.046494643 | 0.1170059  | 9.4807511e-98  | 5.1610222e-130 | 0.047342089 |
| Q8CI75 | Dis3l2  | DIS3-like exonuclease 2                                      | 39.65   | 1.15  | 97775  | 1  | 0.02301618 | 3.340715605 | 0.1170059  | 2.191382e-97   | 1.3227834e-129 | 0.047342089 |
| O08997 | Atox1   | Copper transport protein ATOX1                               | 284     | 58.82 | 7338   | 4  | 0.02303234 | 1.836007668 | 0.1170059  | 5.0577683e-97  | 3.3859984e-129 | 0.047342089 |
| Q8BH43 | Wasf2   | Wiskott-Aldrich syndrome protein family member 2             | 243.43  | 10.66 | 54074  | 4  | 0.02319507 | 1.639563641 | 0.1176233  | 1.1656417e-96  | 8.6580157e-129 | 0.047591894 |
| P24155 | Thop1   | Thimet oligopeptidase                                        | 192.1   | 5.53  | 78385  | 4  | 0.02328128 | 2.464753063 | 0.11781448 | 2.6824791e-96  | 2.2062726e-128 | 0.04766925  |
| P12749 | Rpl26   | 60S ribosomal protein L26                                    | 360.84  | 31.03 | 17277  | 8  | 0.02335172 | 1.387190016 | 0.11781448 | 6.1641408e-96  | 5.6098229e-128 | 0.04766925  |
| Q9WUM4 | Coro1c  | Coronin-1C                                                   | 861.13  | 36.08 | 53121  | 13 | 0.02335657 | 1.271436318 | 0.11781448 | 1.414404e-95   | 1.4236403e-127 | 0.04766925  |
| P22509 | Fbl     | rRNA 2'-O-methyltransferase fibrillar                        | 918.82  | 58.1  | 34222  | 16 | 0.02361586 | 0.67461054  | 0.11891229 | 3.2407011e-95  | 3.6096595e-127 | 0.048113439 |
| Q9D662 | Sec23b  | Protein transport protein Sec23B                             | 697.68  | 21.51 | 86437  | 11 | 0.02367749 | 1.458074836 | 0.11901275 | 7.4142772e-95  | 9.1075903e-127 | 0.048154087 |
| P21708 | Mapk3   | Mitogen-activated protein kinase 3                           | 385.13  | 23.16 | 43081  | 9  | 0.0238451  | 1.625443074 | 0.11961909 | 1.6938027e-94  | 2.2938867e-126 | 0.048399419 |
| Q8BV13 | Cops7b  | COP9 signalosome complex subunit 7b                          | 38.11   | 7.2   | 29689  | 1  | 0.02392061 | 3.853630623 | 0.11961909 | 3.8638549e-94  | 5.7578193e-126 | 0.048399419 |
| Q61686 | Cbx5    | Chromobox protein homolog 5                                  | 248.3   | 26.18 | 22186  | 5  | 0.02395389 | 0.843003993 | 0.11961909 | 8.8012136e-94  | 1.4424094e-125 | 0.048399419 |
| Q68FH4 | Galk2   | N-acetylgalactosamine kinase                                 | 108.72  | 5.02  | 50503  | 2  | 0.02396572 | 1.928622565 | 0.11961909 | 2.0018332e-93  | 3.6086767e-125 | 0.048399419 |
| P62748 | Hpcal1  | Hippocalcin-like protein 1                                   | 58.64   | 16.58 | 22338  | 2  | 0.02401631 | 4.288970079 | 0.11966244 | 4.5464939e-93  | 9.0194433e-125 | 0.048416959 |
| P10605 | Ctsb    | Cathepsin B                                                  | 1457.13 | 63.72 | 37280  | 21 | 0.02411858 | 1.525920184 | 0.1199626  | 1.0310709e-92  | 2.2507374e-124 | 0.048538407 |
| P60517 | Gabarap | Gamma-aminobutyric acid receptor-associated protein          | 186.83  | 21.37 | 13918  | 3  | 0.02417201 | 1.81874297  | 0.12001927 | 2.3348739e-92  | 5.6032702e-124 | 0.048561337 |
| Q3U0V1 | Khsrp   | Far upstream element-binding protein 2                       | 1259.83 | 42.91 | 76775  | 20 | 0.0242542  | 1.234680417 | 0.12021831 | 5.2796011e-92  | 1.3926952e-123 | 0.048641869 |
| Q91YJ3 | Thyn1   | Thymocyte nuclear protein 1                                  | 78.47   | 6.64  | 26178  | 2  | 0.02434082 | 2.155135562 | 0.12043857 | 1.192069e-91   | 3.4544602e-123 | 0.04873099  |
| Q6AYA1 | Gar1    | H/ACA ribonucleoprotein complex subunit 1                    | 104.08  | 9.73  | 23011  | 2  | 0.02443859 | 0.57667368  | 0.12051107 | 2.6875966e-91  | 8.5504221e-123 | 0.048760325 |
| P27612 | Plaa    | Phospholipase A-2-activating protein                         | 554.38  | 17.76 | 87221  | 10 | 0.0244399  | 1.977380649 | 0.12051107 | 6.0504677e-91  | 2.1115847e-122 | 0.048760325 |
| Q0P5W1 | Vps8    | Vacuolar protein sorting-associated protein 8 homolog        | 37.15   | 0.49  | 161146 | 1  | 0.02453819 | 2.424932115 | 0.12074696 | 1.3601156e-90  | 5.2104189e-122 | 0.048855767 |
| O88902 | Ptpn23  | Tyrosine-protein phosphatase non-receptor type 23            | 87.02   | 1.73  | 163454 | 2  | 0.02458962 | 2.659456077 | 0.12074696 | 3.0529836e-90  | 1.2827748e-121 | 0.048855767 |

|        |          |                                                                                  |         |       |        |    |            |             |            |               |                |             |
|--------|----------|----------------------------------------------------------------------------------|---------|-------|--------|----|------------|-------------|------------|---------------|----------------|-------------|
| Q8R2E9 | Ero1b    | ERO1-like protein beta                                                           | 223.18  | 8.99  | 53518  | 4  | 0.02474293 | 2.256676376 | 0.12074696 | 6.8428137e-90 | 3.1531705e-121 | 0.048855767 |
| P04256 | Hnrnpa1  | Heterogeneous nuclear ribonucleoprotein A1                                       | 1476.03 | 55.31 | 34212  | 21 | 0.02476358 | 0.704468116 | 0.12074696 | 1.5314624e-89 | 7.7269996e-121 | 0.048855767 |
| Q02356 | Ampd2    | AMP deaminase 2                                                                  | 86.4    | 2.43  | 94787  | 2  | 0.02480312 | 2.176162769 | 0.12074696 | 3.4224661e-89 | 1.8914487e-120 | 0.048855767 |
| Q3TIV5 | Zc3h15   | Zinc finger CCCH domain-containing protein 15                                    | 188.14  | 8.22  | 48327  | 3  | 0.02483894 | 1.634661912 | 0.12074696 | 7.6371786e-89 | 4.623573e-120  | 0.048855767 |
| P51807 | Dynl1    | Dynein light chain Tctex-type 1                                                  | 61.35   | 15.93 | 12483  | 1  | 0.02487123 | 9.549798492 | 0.12074696 | 1.7017177e-88 | 1.1287149e-119 | 0.048855767 |
| Q5XI41 | Tram1    | Translocating chain-associated membrane protein 1                                | 194.05  | 6.95  | 43030  | 3  | 0.0248784  | 0.697768865 | 0.12074696 | 3.786192e-88  | 2.7519261e-119 | 0.048855767 |
| P43275 | Hist1h1a | Histone H1.1                                                                     | 511.19  | 36.15 | 21785  | 9  | 0.02492405 | 0.649363956 | 0.12074696 | 8.4115903e-88 | 6.7033877e-119 | 0.048855767 |
| Q9JLT4 | Txnrd2   | Thioredoxin reductase 2, mitochondrial                                           | 176.76  | 5.15  | 56603  | 2  | 0.02494514 | 1.431575687 | 0.12074696 | 1.866009e-87  | 1.6304706e-118 | 0.048855767 |
| Q9QUR7 | Pin1     | Peptidyl-prolyl cis-trans isomerase NIMA-interacting 1                           | 134.52  | 20.61 | 18370  | 2  | 0.02495423 | 1.967077278 | 0.12074696 | 4.1334179e-87 | 3.9613936e-118 | 0.048855767 |
| Q9CRC8 | Lrrc40   | Leucine-rich repeat-containing protein 40                                        | 133.78  | 4.32  | 68076  | 2  | 0.02501882 | 1.982218149 | 0.12074696 | 9.1424926e-87 | 9.6155613e-118 | 0.048855767 |
| Q8CE96 | Trmt6    | tRNA (adenine(58)-N(1))-methyltransferase non-catalytic subunit TRM6             | 64.97   | 3.62  | 55518  | 1  | 0.02503755 | 3.06988675  | 0.12074696 | 2.0192005e-86 | 2.3299341e-117 | 0.048855767 |
| Q9D7S7 | Rpl22l1  | 60S ribosomal protein L22-like 1                                                 | 294.61  | 45.08 | 14467  | 4  | 0.02509847 | 1.385402601 | 0.12083665 | 4.453009e-86  | 5.6395359e-117 | 0.04889206  |
| Q9DAR7 | Deprs    | m7GpppX diphosphatase                                                            | 448.69  | 35.5  | 38988  | 9  | 0.02539074 | 2.047188912 | 0.12156612 | 9.8058853e-86 | 1.3627301e-116 | 0.049187209 |
| Q9CQN1 | Trap1    | Heat shock protein 75 kDa, mitochondrial                                         | 897.78  | 30.17 | 80209  | 15 | 0.0253917  | 1.350182907 | 0.12156612 | 2.1561498e-85 | 3.2765157e-116 | 0.049187209 |
| Q8R4Y8 | Rttm     | Rotatin                                                                          | 42.11   | 0.31  | 248489 | 1  | 0.02544574 | 1.915096937 | 0.12156612 | 4.734016e-85  | 7.8715282e-116 | 0.049187209 |
| Q9Z2L0 | Vdac1    | Voltage-dependent anion-selective channel protein 1                              | 1355.54 | 78.09 | 30756  | 18 | 0.02553495 | 0.605348854 | 0.12156612 | 1.0378605e-84 | 1.8880928e-115 | 0.049187209 |
| P25322 | Cend1    | G1/S-specific cyclin-D1                                                          | 101.89  | 9.49  | 33429  | 2  | 0.02561405 | 1.993200957 | 0.12156612 | 2.2719903e-84 | 4.5195073e-115 | 0.049187209 |
| Q8CGY8 | Ogt      | UDP-N-acetylglucosamine--peptide N-acetylglucosaminyltransferase 110 kDa subunit | 320.67  | 8.41  | 116952 | 6  | 0.02561482 | 1.850018529 | 0.12156612 | 4.9662891e-84 | 1.0797583e-114 | 0.049187209 |
| P26638 | Sars     | Serine--tRNA ligase, cytoplasmic                                                 | 726.71  | 29.69 | 58389  | 14 | 0.02567245 | 1.621115816 | 0.12156612 | 1.0839652e-83 | 2.577549e-114  | 0.049187209 |
| P70315 | Was      | Wiskott-Aldrich syndrome protein homolog                                         | 155.03  | 13.08 | 54192  | 3  | 0.02567498 | 1.92870939  | 0.12156612 | 2.3624154e-83 | 6.1430888e-114 | 0.049187209 |
| P51859 | Hdgf     | Hepatoma-derived growth factor                                                   | 430.74  | 49.37 | 26269  | 8  | 0.02571553 | 1.465266386 | 0.12156612 | 5.1410826e-83 | 1.4628508e-113 | 0.049187209 |
| Q9JKP5 | Mbnl1    | Muscleblind-like protein 1                                                       | 350.63  | 25.22 | 36976  | 6  | 0.02572509 | 1.563256583 | 0.12156612 | 1.1171463e-82 | 3.4786942e-113 | 0.049187209 |
| Q9DCD0 | Pgd      | 6-phosphogluconate dehydrogenase, decarboxylating                                | 1873.08 | 56.52 | 53247  | 26 | 0.02581678 | 1.46010803  | 0.12156612 | 2.4239434e-82 | 8.2646092e-113 | 0.049187209 |
| P18654 | Rps6ka3  | Ribosomal protein S6 kinase alpha-3                                              | 78.01   | 2.57  | 83694  | 2  | 0.02584691 | 1.99303192  | 0.12156612 | 5.2515995e-82 | 1.9594057e-112 | 0.049187209 |
| O88342 | Wdr1     | WD repeat-containing protein 1                                                   | 1345.48 | 49.83 | 66407  | 20 | 0.02592046 | 1.510883009 | 0.12156612 | 1.1361018e-81 | 4.6397336e-112 | 0.049187209 |
| Q9CQH3 | Ndufb5   | NADH dehydrogenase [ubiquinone] 1 beta subcomplex subunit 5, mitochondrial       | 66.67   | 5.82  | 21710  | 1  | 0.02596111 | 1.928429808 | 0.12156612 | 2.4541389e-81 | 1.0966533e-111 | 0.049187209 |
| Q9CQX2 | Cyb5b    | Cytochrome b5 type B                                                             | 95.89   | 15.75 | 16318  | 2  | 0.02596132 | 0.785780299 | 0.12156612 | 5.2934291e-81 | 2.5885135e-111 | 0.049187209 |
| Q61990 | Pcbp2    | Poly(rC)-binding protein 2                                                       | 955.25  | 46.96 | 38222  | 13 | 0.02598166 | 1.298078726 | 0.12156612 | 1.1400684e-80 | 6.1048708e-111 | 0.049187209 |
| Q91YR5 | Mettl13  | Methyltransferase-like protein 13                                                | 87.05   | 3.01  | 78757  | 2  | 0.02599988 | 2.136542902 | 0.12156612 | 2.4517732e-80 | 1.4382262e-110 | 0.049187209 |
| Q00PI9 | Hnrnpul2 | Heterogeneous nuclear ribonucleoprotein U-like protein 2                         | 689.28  | 17.58 | 84940  | 12 | 0.02601643 | 0.745208729 | 0.12156612 | 5.2648389e-80 | 3.384658e-110  | 0.049187209 |
| Q05816 | Fabp5    | Fatty acid-binding protein 5                                                     | 1148.5  | 80    | 15137  | 16 | 0.02618138 | 1.73604111  | 0.12213698 | 1.1288728e-79 | 7.9569872e-110 | 0.049418187 |
| Q6PGL7 | Washc2   | WASH complex subunit 2                                                           | 103.18  | 3.15  | 145311 | 2  | 0.02634122 | 2.459181842 | 0.12247801 | 2.4169068e-79 | 1.8649022e-109 | 0.049556172 |
| P21956 | Mfge8    | Lactadherin                                                                      | 112.39  | 6.7   | 51241  | 3  | 0.02641544 | 1.524327136 | 0.12247801 | 5.1668931e-79 | 4.3578783e-109 | 0.049556172 |
| Q9Z0P5 | Twf2     | Twinfilin-2                                                                      | 386.7   | 32.95 | 39471  | 7  | 0.02647635 | 1.689915749 | 0.12247801 | 1.1029442e-78 | 1.016504e-108  | 0.049556172 |
| P00375 | Dhfr     | Dihydrofolate reductase                                                          | 231.23  | 33.69 | 21606  | 5  | 0.0264804  | 2.536031041 | 0.12247801 | 2.3508874e-78 | 2.3672088e-108 | 0.049556172 |
| Q9CPV4 | Glod4    | Glyoxalase domain-containing protein 4                                           | 677.95  | 56.71 | 33317  | 16 | 0.02653183 | 1.771280628 | 0.12247801 | 5.0033875e-78 | 5.5079034e-108 | 0.049556172 |
| Q8BFT2 | Haus4    | HAUS augmin-like complex subunit 4                                               | 40.47   | 7.16  | 42197  | 1  | 0.02658017 | 6.84280266  | 0.12247801 | 1.0632864e-77 | 1.2796312e-107 | 0.049556172 |
| Q6PGB6 | Naa50    | N-alpha-acetyltransferase 50                                                     | 171.35  | 23.67 | 19144  | 3  | 0.02659503 | 1.951463188 | 0.12247801 | 2.2562639e-77 | 2.9685915e-107 | 0.049556172 |
| Q02053 | Uba1     | Ubiquitin-like modifier-activating enzyme 1                                      | 1796.89 | 34.5  | 117809 | 27 | 0.02665266 | 1.600871245 | 0.12247801 | 4.7806053e-77 | 6.8797904e-107 | 0.049556172 |
| Q9JLI6 | Scly     | Selenocysteine lyase                                                             | 153.62  | 15.97 | 47174  | 4  | 0.02666113 | 1.879090016 | 0.12247801 | 1.011414e-76  | 1.5918947e-106 | 0.049556172 |
| P56383 | Atp5mc2  | ATP synthase F(0) complex subunit C2, mitochondrial                              | 220.62  | 26.03 | 15476  | 2  | 0.02676338 | 0.05713911  | 0.12247801 | 2.136623e-76  | 3.6800064e-106 | 0.049556172 |
| Q9QYJ0 | Dnaja2   | DnaJ homolog subfamily A member 2                                                | 366.82  | 27.43 | 45746  | 7  | 0.0267656  | 1.400169143 | 0.12247801 | 4.5069158e-76 | 8.4887662e-106 | 0.049556172 |
| O54747 | Pold1    | DNA polymerase delta catalytic subunit                                           | 298.75  | 6.26  | 123601 | 7  | 0.02676927 | 1.776973248 | 0.12247801 | 9.4925608e-76 | 1.9564601e-105 | 0.049556172 |
| P62914 | Rpl11    | 60S ribosomal protein L11                                                        | 632.19  | 54.49 | 20252  | 11 | 0.02682726 | 1.388435072 | 0.12253582 | 1.9963629e-75 | 4.5052482e-105 | 0.049579566 |
| Q8BUM3 | Ptpn7    | Tyrosine-protein phosphatase non-receptor type 7                                 | 112.28  | 8.91  | 40351  | 2  | 0.02690104 | 2.455930364 | 0.12253582 | 4.1922531e-75 | 1.0358108e-104 | 0.049579566 |
| Q9CQW9 | Ifitm3   | Interferon-induced transmembrane protein 3                                       | 423.19  | 48.91 | 14954  | 6  | 0.0269421  | 1.520339537 | 0.12253582 | 8.7903707e-75 | 2.3772147e-104 | 0.049579566 |
| Q9EPU0 | Upf1     | Regulator of nonsense transcripts 1                                              | 1036.76 | 19.4  | 123967 | 21 | 0.02701764 | 1.520928039 | 0.12253582 | 1.8404258e-74 | 5.4483794e-104 | 0.049579566 |

|        |         |                                                                     |         |       |        |    |            |             |            |               |                |             |
|--------|---------|---------------------------------------------------------------------|---------|-------|--------|----|------------|-------------|------------|---------------|----------------|-------------|
| Q6NVF9 | Cpsf6   | Cleavage and polyadenylation specificity factor subunit 6           | 512.74  | 19.06 | 59153  | 8  | 0.02708624 | 1.286031944 | 0.12253582 | 3.8475179e-74 | 1.2464793e-103 | 0.049579566 |
| Q8BFQ8 | Gatd1   | Glutamine amidotransferase-like class 1 domain-containing protein 1 | 117.08  | 10.45 | 23277  | 2  | 0.02719874 | 2.008931582 | 0.12253582 | 8.0314497e-74 | 2.8468315e-103 | 0.049579566 |
| P58389 | Ptpa    | Serine/threonine-protein phosphatase 2A activator                   | 93.03   | 5.88  | 36710  | 1  | 0.02719907 | 3.089302946 | 0.12253582 | 1.6740096e-73 | 6.4871802e-103 | 0.049579566 |
| P54775 | Psmc4   | 26S proteasome regulatory subunit 6B                                | 397.47  | 23.92 | 47408  | 8  | 0.02722925 | 1.31879254  | 0.12253582 | 3.4839543e-73 | 1.4770309e-102 | 0.049579566 |
| Q9D019 | Rars    | Arginine--tRNA ligase, cytoplasmic                                  | 1329.99 | 40    | 75674  | 23 | 0.02723894 | 1.597400697 | 0.12253582 | 7.2399768e-73 | 3.3589006e-102 | 0.049579566 |
| P12368 | Prkar2a | cAMP-dependent protein kinase type II-alpha regulatory subunit      | 251.98  | 12.97 | 45480  | 4  | 0.02724734 | 1.901796555 | 0.12253582 | 1.5022835e-72 | 7.6311702e-102 | 0.049579566 |
| O35226 | Psm4    | 26S proteasome non-ATPase regulatory subunit 4                      | 465.89  | 32.45 | 40704  | 8  | 0.02725403 | 1.315059692 | 0.12253582 | 3.1125502e-72 | 1.73212e-101   | 0.049579566 |
| Q8BVY0 | Rsl1d1  | Ribosomal L1 domain-containing protein 1                            | 1118.56 | 40.71 | 50421  | 14 | 0.02740042 | 0.671782167 | 0.1229244  | 6.4391767e-72 | 3.9279529e-101 | 0.049736787 |
| Q99K85 | Psat1   | Phosphoserine aminotransferase                                      | 1514.64 | 60.27 | 40473  | 25 | 0.02742656 | 1.736103205 | 0.1229244  | 1.3301284e-71 | 8.8836604e-101 | 0.049736787 |
| O08663 | Metap2  | Methionine aminopeptidase 2                                         | 107.39  | 5.44  | 52922  | 2  | 0.02749677 | 7.968038359 | 0.12299706 | 2.7435054e-71 | 2.0068442e-100 | 0.049766187 |
| P68181 | Prkacb  | cAMP-dependent protein kinase catalytic subunit beta                | 261.26  | 16.24 | 40708  | 5  | 0.02755713 | 1.923549361 | 0.12299706 | 5.6502392e-71 | 4.525767e-100  | 0.049766187 |
| Q9D7H3 | RtcA    | RNA 3'-terminal phosphate cyclase                                   | 185.8   | 12.02 | 39254  | 3  | 0.02757937 | 1.925126275 | 0.12299706 | 1.1619204e-70 | 1.0190185e-99  | 0.049766187 |
| Q9JL18 | Sart3   | Squamous cell carcinoma antigen recognized by T-cells 3             | 366.2   | 9.88  | 109619 | 7  | 0.02765219 | 1.786687111 | 0.12299706 | 2.3858007e-70 | 2.2918673e-99  | 0.049766187 |
| P61222 | Abce1   | ATP-binding cassette sub-family E member 1                          | 1040.79 | 34.89 | 67314  | 16 | 0.02765818 | 1.724647439 | 0.12299706 | 4.8914766e-70 | 5.1456734e-99  | 0.049766187 |
| Q8BKC5 | Ipo5    | Importin-5                                                          | 778.2   | 19.05 | 123591 | 14 | 0.02782527 | 1.670064973 | 0.12354768 | 1.0013677e-69 | 1.1542494e-98  | 0.049988977 |
| Q9EP69 | Sacm11  | Phosphatidylinositol phosphatase SAC1                               | 227.73  | 9.2   | 66944  | 5  | 0.02814734 | 0.755368493 | 0.12448275 | 2.0468908e-69 | 2.5816717e-98  | 0.050367318 |
| P62889 | Rpl30   | 60S ribosomal protein L30                                           | 437.35  | 58.26 | 12784  | 7  | 0.02816699 | 1.650379662 | 0.12448275 | 4.1777557e-69 | 5.7469481e-98  | 0.050367318 |
| O35142 | Copb2   | Coatomer subunit beta'                                              | 807.7   | 26.52 | 102551 | 15 | 0.02818023 | 1.606557836 | 0.12448275 | 8.5140937e-69 | 1.2779405e-97  | 0.050367318 |
| Q9QYB1 | Clic4   | Chloride intracellular channel protein 4                            | 921.84  | 57.31 | 28729  | 13 | 0.02821028 | 1.684618142 | 0.12448275 | 1.7325292e-68 | 2.8389269e-97  | 0.050367318 |
| Q8BG30 | Nelfa   | Negative elongation factor A                                        | 126.8   | 4.53  | 57585  | 2  | 0.02831355 | 1.604416043 | 0.12454753 | 3.5202152e-68 | 6.2991141e-97  | 0.050393526 |
| Q9CQV5 | Mrps24  | 28S ribosomal protein S24, mitochondrial                            | 41.99   | 4.79  | 18901  | 1  | 0.02833895 | 2.613732175 | 0.12454753 | 7.1417411e-68 | 1.3947777e-96  | 0.050393526 |
| Q9QUM9 | Psm6    | Proteasome subunit alpha type-6                                     | 783.67  | 64.63 | 27372  | 13 | 0.02839321 | 1.639288401 | 0.12454753 | 1.4467217e-67 | 3.084873e-96   | 0.050393526 |
| Q91Z53 | Grhpr   | Glyoxylate reductase/hydroxypyruvate reductase                      | 235.94  | 19.51 | 35329  | 5  | 0.02847094 | 1.919216752 | 0.12454753 | 2.9262512e-67 | 6.8128152e-96  | 0.050393526 |
| P47197 | Akt2    | RAC-beta serine/threonine-protein kinase                            | 47.76   | 1.66  | 55543  | 1  | 0.02847318 | 3.111483903 | 0.12454753 | 5.9099486e-67 | 1.50194e-95    | 0.050393526 |
| Q9QZ88 | Vps29   | Vacuolar protein sorting-associated protein 29                      | 200.28  | 37.36 | 20496  | 5  | 0.02849725 | 2.04685737  | 0.12454753 | 1.1917935e-66 | 3.3082989e-95  | 0.050393526 |
| O35303 | Dnm11   | Dynamin-1-like protein                                              | 296.86  | 8.61  | 83908  | 6  | 0.02858712 | 1.981573939 | 0.12454753 | 2.3997351e-66 | 7.2789726e-95  | 0.050393526 |
| Q9DAK9 | Phpt1   | 14 kDa phosphohistidine phosphatase                                 | 42.81   | 19.35 | 13997  | 1  | 0.02864487 | 3.477900373 | 0.12454753 | 4.8246995e-66 | 1.5984954e-94  | 0.050393526 |
| Q9D2R0 | Aacs    | Acetoacetyl-CoA synthetase                                          | 118.49  | 4.17  | 75200  | 3  | 0.0287363  | 1.868049208 | 0.12454753 | 9.6854919e-66 | 3.5050521e-94  | 0.050393526 |
| Q80X80 | C2cd2l  | Phospholipid transfer protein C2CD2L                                | 53.79   | 1.42  | 76329  | 1  | 0.0287533  | 2.436939498 | 0.12454753 | 1.94141e-65   | 7.6709486e-94  | 0.050393526 |
| P49718 | Mcm5    | DNA replication licensing factor MCM5                               | 1088.75 | 30.97 | 82343  | 22 | 0.02876108 | 1.326949926 | 0.12454753 | 3.8855882e-65 | 1.6770802e-93  | 0.050393526 |
| Q8K2T1 | Nmral1  | NmrA-like family domain-containing protein 1                        | 111.05  | 7.77  | 34376  | 3  | 0.02876229 | 2.282858621 | 0.12454753 | 7.7649724e-65 | 3.6631513e-93  | 0.050393526 |
| D3ZLZ7 | Impdh1  | Inosine-5'-monophosphate dehydrogenase 1                            | 229.12  | 6.61  | 55293  | 4  | 0.02879207 | 1.994765589 | 0.12454753 | 1.5494103e-64 | 7.9943752e-93  | 0.050393526 |
| Q9D1G2 | Pmvk    | Phosphomevalonate kinase                                            | 162.67  | 19.27 | 21916  | 3  | 0.02889283 | 2.069611848 | 0.12479429 | 3.0869963e-64 | 1.7426005e-92  | 0.05049337  |
| P62944 | Ap2b1   | AP-2 complex subunit beta                                           | 723.3   | 20.28 | 104553 | 14 | 0.02903564 | 1.175145279 | 0.1251133  | 6.1411345e-64 | 3.7908637e-92  | 0.050622447 |
| Q99JW2 | Acy1    | Aminoacylase-1                                                      | 645.02  | 33.09 | 45781  | 9  | 0.02905433 | 1.631961164 | 0.1251133  | 1.2198423e-63 | 8.2261846e-92  | 0.050622447 |
| Q9JL35 | Hmgn5   | High mobility group nucleosome-binding domain-containing protein 5  | 149.55  | 10.1  | 45344  | 4  | 0.02915977 | 1.239013524 | 0.12537821 | 2.4193634e-63 | 1.7832e-91     | 0.050729631 |
| Q9QY17 | Pacsin2 | Protein kinase C and casein kinase substrate in neurons 2 protein   | 164.27  | 8.4   | 55978  | 4  | 0.02948353 | 2.301096968 | 0.12657966 | 4.7911588e-63 | 3.857557e-91   | 0.051215754 |
| Q8R1N4 | Nudcd3  | NudC domain-containing protein 3                                    | 40.24   | 3.31  | 40890  | 1  | 0.02957532 | 2.123557261 | 0.12665636 | 9.4737473e-63 | 8.3074276e-91  | 0.051246786 |
| Q8CI33 | Cwf19l1 | CWF19-like protein 1                                                | 80.37   | 5.4   | 60193  | 2  | 0.02959012 | 2.180783535 | 0.12665636 | 1.8704433e-62 | 1.7857067e-90  | 0.051246786 |
| P07742 | Rrm1    | Ribonucleoside-diphosphate reductase large subunit                  | 373.05  | 14.02 | 90210  | 7  | 0.02971686 | 1.513783227 | 0.12665934 | 3.6873004e-62 | 3.8345897e-90  | 0.051247994 |
| Q8R3C6 | Rbm19   | Probable RNA-binding protein 19                                     | 38.38   | 1.05  | 106083 | 1  | 0.02978767 | 2.028166299 | 0.12665934 | 7.2579416e-62 | 8.2158045e-90  | 0.051247994 |
| P63085 | Mapk1   | Mitogen-activated protein kinase 1                                  | 413.33  | 29.89 | 41276  | 10 | 0.02980126 | 1.931498619 | 0.12665934 | 1.4264584e-61 | 1.7574252e-89  | 0.051247994 |
| P84091 | Ap2m1   | AP-2 complex subunit mu                                             | 534.71  | 31.26 | 49655  | 12 | 0.02986191 | 1.586173198 | 0.12665934 | 2.7992724e-61 | 3.7555634e-89  | 0.051247994 |
| Q3UNDO | Skap2   | Src kinase-associated phosphoprotein 2                              | 54.93   | 5.59  | 40712  | 2  | 0.02987756 | 1.475925453 | 0.12665934 | 5.4849335e-61 | 8.0134317e-89  | 0.051247994 |
| Q9JMH6 | Txnrd1  | Thioredoxin reductase 1, cytoplasmic                                | 1055.88 | 42.09 | 67084  | 15 | 0.02990972 | 1.565222587 | 0.12665934 | 1.0730932e-60 | 1.7081382e-88  | 0.051247994 |
| P35601 | Rfc1    | Replication factor C subunit 1                                      | 78.45   | 1.06  | 125985 | 1  | 0.0299269  | 2.303124016 | 0.12665934 | 2.0962501e-60 | 3.6367132e-88  | 0.051247994 |
| Q61081 | Cdc37   | Hsp90 co-chaperone Cdc37                                            | 301.26  | 14.25 | 44593  | 5  | 0.02994573 | 1.713940093 | 0.12665934 | 4.0887266e-60 | 7.7347773e-88  | 0.051247994 |



|        |          |                                                                        |         |       |        |    |            |             |            |               |               |             |
|--------|----------|------------------------------------------------------------------------|---------|-------|--------|----|------------|-------------|------------|---------------|---------------|-------------|
| B2RYU6 | Trappc21 | Trafficking protein particle complex subunit 2-like protein            | 51.92   | 6.47  | 16032  | 1  | 0.03012437 | 2.755334313 | 0.12722645 | 7.9629151e-60 | 1.643353e-87  | 0.051477453 |
| Q8BK67 | Rcc2     | Protein RCC2                                                           | 1429.69 | 59.62 | 55983  | 24 | 0.0301801  | 1.295242455 | 0.12727353 | 1.5484417e-59 | 3.481779e-87  | 0.051496501 |
| Q6DGG1 | Abhd14b  | Protein ABHD14B                                                        | 72.93   | 10    | 22618  | 2  | 0.03036058 | 3.006772118 | 0.12753629 | 3.0064646e-59 | 7.366198e-87  | 0.051602818 |
| Q80Y14 | Glrx5    | Glutaredoxin-related protein 5, mitochondrial                          | 90.76   | 17.76 | 16292  | 2  | 0.03036602 | 2.171530936 | 0.12753629 | 5.8284831e-59 | 1.5540819e-86 | 0.051602818 |
| P29066 | Arrb1    | Beta-arrestin-1                                                        | 217.49  | 11.96 | 47020  | 5  | 0.03037642 | 1.505641196 | 0.12753629 | 1.1282177e-58 | 3.2757768e-86 | 0.051602818 |
| Q6PDG5 | Smarrcc2 | SWI/SNF complex subunit SMARCC2                                        | 341.55  | 6.51  | 132604 | 6  | 0.03045108 | 1.17016569  | 0.12766201 | 2.1805592e-58 | 6.8982761e-86 | 0.051653688 |
| Q9CZH3 | Psmg3    | Proteasome assembly chaperone 3                                        | 90.16   | 27.05 | 13331  | 2  | 0.03056945 | 1.925323026 | 0.12797033 | 4.2080436e-58 | 1.4502856e-85 | 0.051778438 |
| P62918 | Rp18     | 60S ribosomal protein L8                                               | 569.76  | 42.02 | 28025  | 11 | 0.030651   | 1.342726415 | 0.12812389 | 8.1082967e-58 | 3.0426534e-85 | 0.051840569 |
| P97825 | Jpt1     | Jupiter microtubule associated homolog 1                               | 120.6   | 27.27 | 16081  | 2  | 0.03082827 | 2.367525743 | 0.12867649 | 1.5599685e-57 | 6.3725001e-85 | 0.052064158 |
| Q9CWU9 | Nup37    | Nucleoporin Nup37                                                      | 133.98  | 10.12 | 36732  | 2  | 0.03087784 | 0.515836775 | 0.12869521 | 2.9966671e-57 | 1.3310351e-84 | 0.052071734 |
| Q9D7X3 | Dusp3    | Dual specificity protein phosphatase 3                                 | 600.66  | 59.46 | 20472  | 10 | 0.03110593 | 1.560130602 | 0.12932065 | 5.7477435e-57 | 2.7763769e-84 | 0.052324794 |
| Q8BNU0 | Armc6    | Armadillo repeat-containing protein 6                                  | 90.76   | 4.49  | 50683  | 1  | 0.03111849 | 2.394953209 | 0.12932065 | 1.1007589e-56 | 5.7725654e-84 | 0.052324794 |
| Q9JHW2 | Nit2     | Omega-amidase NIT2                                                     | 523.68  | 35.87 | 30502  | 8  | 0.03127174 | 1.89235957  | 0.12976865 | 2.1048571e-56 | 1.1990552e-83 | 0.05250606  |
| Q3B7D1 | Ube2z    | Ubiquitin-conjugating enzyme E2 Z                                      | 50.67   | 2.25  | 38352  | 1  | 0.03133215 | 423672.444  | 0.12983062 | 4.0187261e-56 | 2.4846043e-83 | 0.052531135 |
| Q3UQ44 | Iqgap2   | Ras GTPase-activating-like protein IQGAP2                              | 100.96  | 1.14  | 180528 | 2  | 0.03140823 | 1.54440104  | 0.12990034 | 7.6610665e-56 | 5.1409329e-83 | 0.052559343 |
| Q9QUJ7 | Acs14    | Long-chain-fatty-acid--CoA ligase 4                                    | 825.24  | 29.68 | 79077  | 16 | 0.03143998 | 1.422830082 | 0.12990034 | 1.458226e-55  | 1.0619992e-82 | 0.052559343 |
| Q07797 | Lgals3bp | Galectin-3-binding protein                                             | 389.03  | 17.85 | 64491  | 6  | 0.03150463 | 1.430030237 | 0.12997936 | 2.7713724e-55 | 2.1912996e-82 | 0.052591315 |
| O70454 | Bud31    | Protein BUD31 homolog                                                  | 180.02  | 20.83 | 17000  | 4  | 0.03157364 | 1.409016511 | 0.13003846 | 5.2589509e-55 | 4.5146987e-82 | 0.052615229 |
| Q6PAR5 | Gapvd1   | GTPase-activating protein and VPS9 domain-containing protein 1         | 154.87  | 3.02  | 162402 | 3  | 0.03161005 | 2.352748704 | 0.13003846 | 9.9640806e-55 | 9.2872435e-82 | 0.052615229 |
| P53534 | Pygb     | Glycogen phosphorylase, brain form                                     | 585.22  | 16.71 | 96174  | 10 | 0.03167476 | 1.670806994 | 0.13009574 | 1.8849895e-54 | 1.908183e-81  | 0.052638406 |
| Q8CIN4 | Pak2     | Serine/threonine-protein kinase PAK 2                                  | 936.55  | 36.45 | 57930  | 14 | 0.03178667 | 1.672456123 | 0.13009574 | 3.5605241e-54 | 3.9147515e-81 | 0.052638406 |
| Q8BSY0 | Asph     | Aspartyl/asparaginyl beta-hydroxylase                                  | 643.15  | 24.83 | 83042  | 14 | 0.03181171 | 1.172576826 | 0.13009574 | 6.7150913e-54 | 8.0155666e-81 | 0.052638406 |
| P22907 | Hmbs     | Porphobilinogen deaminase                                              | 323.75  | 17.73 | 39344  | 4  | 0.03181983 | 1.816364687 | 0.13009574 | 1.264511e-53  | 1.6394197e-80 | 0.052638406 |
| Q63068 | Phax     | Phosphorylated adapter RNA export protein                              | 46.11   | 2.86  | 43166  | 1  | 0.0319652  | 1.927796638 | 0.13009574 | 2.3775283e-53 | 3.3500013e-80 | 0.052638406 |
| Q9D906 | Atg7     | Ubiquitin-like modifier-activating enzyme ATG7                         | 277.77  | 13.47 | 77520  | 7  | 0.03198312 | 1.954492995 | 0.13009574 | 4.4633495e-53 | 6.8297389e-80 | 0.052638406 |
| Q76N33 | Stambpl1 | AMSH-like protease                                                     | 75.02   | 4.59  | 49640  | 1  | 0.03200165 | 1.968581014 | 0.13009574 | 8.366193e-53  | 1.3909773e-79 | 0.052638406 |
| Q8VD75 | Hip1     | Huntingtin-interacting protein 1                                       | 62.6    | 1.65  | 115202 | 1  | 0.03203105 | 4.138521799 | 0.13009574 | 1.5657642e-52 | 2.8300204e-79 | 0.052638406 |
| O09131 | Gsto1    | Glutathione S-transferase omega-1                                      | 84.83   | 7.92  | 27498  | 2  | 0.03203408 | 2.006211721 | 0.13009574 | 2.925877e-52  | 5.7512914e-79 | 0.052638406 |
| Q8VBV7 | Cops8    | COP9 signalosome complex subunit 8                                     | 216.54  | 29.67 | 23256  | 4  | 0.03208029 | 1.837692421 | 0.13009832 | 5.4590446e-52 | 1.1677775e-78 | 0.052639448 |
| Q4AEF8 | Copg1    | Coatomer subunit gamma-1                                               | 709.58  | 20.02 | 97614  | 12 | 0.03220122 | 1.751845922 | 0.13024622 | 1.0169693e-51 | 2.3680356e-78 | 0.052699291 |
| Q9D270 | Zdhhc21  | Probable palmitoyltransferase ZDHHC21                                  | 49.75   | 3.02  | 31331  | 1  | 0.03221068 | 0.555121929 | 0.13024622 | 1.8915999e-51 | 4.792166e-78  | 0.052699291 |
| P80318 | Cct3     | T-complex protein 1 subunit gamma                                      | 1368.41 | 40.92 | 60630  | 24 | 0.03225362 | 1.553499566 | 0.13024622 | 3.5130209e-51 | 9.6887178e-78 | 0.052699291 |
| P62715 | Ppp2cb   | Serine/threonine-protein phosphatase 2A catalytic subunit beta isoform | 493.98  | 33.33 | 35575  | 9  | 0.03233938 | 1.682386553 | 0.1302935  | 6.5142116e-51 | 1.9563609e-77 | 0.05271842  |
| B2RXC1 | Trappc11 | Trafficking protein particle complex subunit 11                        | 47.95   | 0.79  | 128396 | 1  | 0.0323566  | 2.921882543 | 0.1302935  | 1.2060696e-50 | 3.9436582e-77 | 0.05271842  |
| O09167 | Rpl21    | 60S ribosomal protein L21                                              | 328.88  | 38.12 | 18562  | 6  | 0.03242106 | 1.43800552  | 0.13036918 | 2.2295228e-50 | 7.9415767e-77 | 0.052749043 |
| Q569Z6 | Thrap3   | Thyroid hormone receptor-associated protein 3                          | 312.61  | 9.25  | 108178 | 6  | 0.03256746 | 0.551253388 | 0.13055139 | 4.1150984e-50 | 1.5968808e-76 | 0.052822765 |
| Q6ZQ58 | Larp1    | La-related protein 1                                                   | 283.35  | 7.09  | 121125 | 5  | 0.03261612 | 1.523359841 | 0.13055139 | 7.5836272e-50 | 3.203725e-76  | 0.052822765 |
| Q9CQR4 | Acot13   | Acyl-coenzyme A thioesterase 13                                        | 263.81  | 37.86 | 15183  | 4  | 0.03263089 | 2.004275149 | 0.13055139 | 1.3954101e-49 | 6.4189632e-76 | 0.052822765 |
| O08583 | Alyref   | THO complex subunit 4                                                  | 441.15  | 47.06 | 26940  | 6  | 0.03264928 | 0.729695919 | 0.13055139 | 2.5636254e-49 | 1.2848197e-75 | 0.052822765 |
| Q8BMP6 | Acbd3    | Golgi resident protein GCP60                                           | 395.69  | 20.76 | 60181  | 7  | 0.03279109 | 2.269769334 | 0.13093505 | 4.7025648e-49 | 2.5690431e-75 | 0.052978002 |
| P58044 | Idi1     | Isopentenyl-diphosphate Delta-isomerase 1                              | 213.48  | 29.07 | 26289  | 4  | 0.03287828 | 1.964976616 | 0.13097771 | 8.6127571e-49 | 5.1255777e-75 | 0.052995262 |
| P0C7N9 | Psmg4    | Proteasome assembly chaperone 4                                        | 93.52   | 33.33 | 13974  | 2  | 0.03293792 | 2.206137679 | 0.13097771 | 1.5749853e-48 | 1.0209025e-74 | 0.052995262 |
| P04692 | Tpm1     | Tropomyosin alpha-1 chain                                              | 379.17  | 16.9  | 32681  | 7  | 0.03299187 | 1.898366652 | 0.13097771 | 2.8756588e-48 | 2.0305313e-74 | 0.052995262 |
| Q4KML4 | Abracl   | Costars family protein ABRACL                                          | 312.09  | 51.85 | 9030   | 6  | 0.03301908 | 1.732917153 | 0.13097771 | 5.2423313e-48 | 4.0331353e-74 | 0.052995262 |
| Q80X41 | Vrk1     | Serine/threonine-protein kinase VRK1                                   | 203.91  | 16.82 | 49741  | 4  | 0.03303116 | 1.522253709 | 0.13097771 | 9.5419581e-48 | 8.0018898e-74 | 0.052995262 |
| O09172 | Gclm     | Glutamate--cysteine ligase regulatory subunit                          | 154.92  | 13.5  | 30535  | 3  | 0.03312297 | 1.364652566 | 0.13115961 | 1.7341081e-47 | 1.5860612e-73 | 0.05306886  |
| P62907 | Rpl10a   | 60S ribosomal protein L10a                                             | 794.08  | 50.69 | 24831  | 15 | 0.03330933 | 1.259724993 | 0.13171486 | 3.1465897e-47 | 3.1383512e-73 | 0.053293521 |
| P0DP26 | Calm1    | Calmodulin-1                                                           | 342.27  | 70.47 | 16838  | 5  | 0.03358916 | 1.958787033 | 0.13263769 | 5.7007114e-47 | 6.1938268e-73 | 0.053666909 |
| Q5XJY5 | Aren1    | Coatomer subunit delta                                                 | 892.83  | 36.01 | 57229  | 18 | 0.03381315 | 1.475675645 | 0.13308406 | 1.0311994e-46 | 1.2182233e-72 | 0.053847519 |
| P49962 | Srp9     | Signal recognition particle 9 kDa protein                              | 44.99   | 12.79 | 10194  | 1  | 0.03382904 | 4.096273945 | 0.13308406 | 1.8624327e-46 | 2.3891204e-72 | 0.053847519 |

|         |           |                                                                             |         |       |        |    |            |             |            |                |               |             |
|---------|-----------|-----------------------------------------------------------------------------|---------|-------|--------|----|------------|-------------|------------|----------------|---------------|-------------|
| Q922Q8  | Lrrc59    | Leucine-rich repeat-containing protein 59                                   | 315.59  | 36.81 | 34877  | 7  | 0.03384204 | 1.551379955 | 0.13308406 | 3.3584781e-46  | 4.6807709e-72 | 0.053847519 |
| Q99P69  | Nuf2      | Kinetochore protein Nuf2                                                    | 35.47   | 2.38  | 54594  | 1  | 0.03405218 | 3.625655083 | 0.13372624 | 6.0468355e-46  | 9.1616895e-72 | 0.05410735  |
| Q3THK3  | Gtf2f1    | General transcription factor IIF subunit 1                                  | 161.33  | 6.3   | 57241  | 2  | 0.03421717 | 2.381257844 | 0.13390311 | 1.087019e-45   | 1.7883038e-71 | 0.054178915 |
| P35505  | Fah       | Fumarylacetoacetase                                                         | 112.53  | 8.35  | 46176  | 2  | 0.03422731 | 1.989595393 | 0.13390311 | 1.9510536e-45  | 3.4825466e-71 | 0.054178915 |
| Q9D2X5  | Mau2      | MAU2 chromatid cohesion factor homolog                                      | 46.81   | 1.13  | 69579  | 1  | 0.03423792 | 4.063886916 | 0.13390311 | 3.4964228e-45  | 6.7755521e-71 | 0.054178915 |
| Q9CQ71  | Rpa3      | Replication protein A 14 kDa subunit                                        | 72.45   | 30.58 | 13584  | 2  | 0.03440502 | 1.575043191 | 0.13436406 | 6.2560627e-45  | 1.3169883e-70 | 0.05436542  |
| Q8WTKY4 | Ciapin1   | Anamorasin                                                                  | 240.31  | 22.33 | 33429  | 5  | 0.03463303 | 1.514180378 | 0.13436406 | 1.11176358e-44 | 2.5539141e-70 | 0.05436542  |
| Q8VEJ4  | Nle1      | Notchless protein homolog 1                                                 | 229.67  | 13.61 | 53134  | 5  | 0.0346349  | 1.366618639 | 0.13436406 | 1.9935229e-44  | 4.9384515e-70 | 0.05436542  |
| Q62384  | Zpr1      | Zinc finger protein ZPR1                                                    | 148.03  | 7.63  | 50715  | 3  | 0.03467827 | 1.582936648 | 0.13436406 | 3.5502879e-44  | 9.541138e-70  | 0.05436542  |
| Q9CWP6  | Mospd2    | Motile sperm domain-containing protein 2                                    | 103.84  | 3.47  | 59855  | 2  | 0.034681   | 2.067554915 | 0.13436406 | 6.3128721e-44  | 1.841095e-69  | 0.05436542  |
| Q9DBR7  | Ppp1r12a  | Protein phosphatase 1 regulatory subunit 12A                                | 49.74   | 0.97  | 114996 | 1  | 0.03468503 | 1.924239336 | 0.13436406 | 1.1207562e-43  | 3.5495431e-69 | 0.05436542  |
| Q9CQ60  | Pgls      | 6-phosphogluconolactonase                                                   | 786.36  | 87.16 | 27254  | 13 | 0.03468522 | 1.608879265 | 0.13436406 | 1.9866241e-43  | 6.8372749e-69 | 0.05436542  |
| Q8R570  | Snap47    | Synaptosomal-associated protein 47                                          | 51.85   | 3.63  | 46524  | 1  | 0.03488237 | 7.668742161 | 0.13475142 | 3.515931e-43   | 1.315896e-68  | 0.054522153 |
| Q6PDM2  | Srsf1     | Serine/arginine-rich splicing factor 1                                      | 544.95  | 33.47 | 27745  | 10 | 0.03489762 | 0.735483885 | 0.13475142 | 6.2127622e-43  | 2.526082e-68  | 0.054522153 |
| Q9Z1G3  | Atp6v1c1  | V-type proton ATPase subunit C 1                                            | 516.22  | 26.18 | 43888  | 9  | 0.03492681 | 1.679908728 | 0.13475142 | 1.0960958e-42  | 4.8444577e-68 | 0.054522153 |
| Q8JZY2  | Comm10    | COMM domain-containing protein 10                                           | 42.59   | 5.94  | 22812  | 1  | 0.03498156 | 5.736679258 | 0.13478051 | 1.9307737e-42  | 9.2802998e-68 | 0.054533921 |
| Q9CQ65  | Mtap      | S-methyl-5'-thioadenosine phosphorylase                                     | 475.25  | 35.34 | 31062  | 8  | 0.03508562 | 1.674002839 | 0.13499927 | 3.3957286e-42  | 1.7754258e-67 | 0.054622434 |
| P25799  | Nfkb1     | Nuclear factor NF-kappa-B p105 subunit                                      | 47.84   | 1.65  | 105615 | 1  | 0.03520527 | 1.768253374 | 0.13511345 | 5.9628373e-42  | 3.3906606e-67 | 0.054668633 |
| O88447  | Klc1      | Kinesin light chain 1                                                       | 104.17  | 4.44  | 61450  | 2  | 0.03520995 | 1.906389564 | 0.13511345 | 1.0454205e-41  | 6.4632633e-67 | 0.054668633 |
| Q5U2Q3  |           | Ester hydrolase C11orf54 homolog                                            | 54.76   | 8.89  | 34993  | 2  | 0.03527855 | 2.515023036 | 0.13514379 | 1.8299818e-41  | 1.2309194e-66 | 0.054680911 |
| P51432  | Plcb3     | 1-phosphatidylinositol 4,5-bisphosphate phosphodiesterase beta-3            | 298.04  | 7.46  | 139487 | 6  | 0.03537489 | 1.388125279 | 0.13514379 | 3.1983053e-41  | 2.3408967e-66 | 0.054680911 |
| Q6WVG3  | Kctd12    | BTB/POZ domain-containing protein KCTD12                                    | 561.19  | 42.2  | 35892  | 9  | 0.03538933 | 1.413851119 | 0.13514379 | 5.5809753e-41  | 4.4443591e-66 | 0.054680911 |
| Q924C1  | Xpo5      | Exportin-5                                                                  | 293.84  | 6.64  | 136973 | 6  | 0.03542043 | 3.192643843 | 0.13514379 | 9.7233737e-41  | 8.4296543e-66 | 0.054680911 |
| Q8C147  | Dock8     | Dedicator of cytokinesis protein 8                                          | 98.39   | 1.19  | 238978 | 2  | 0.03545842 | 2.43533907  | 0.13514379 | 1.6913762e-40  | 1.5970658e-65 | 0.054680911 |
| P61082  | Ube2m     | NEDD8-conjugating enzyme Ubc12                                              | 183.33  | 30.05 | 20900  | 4  | 0.03550187 | 1.687363275 | 0.13514379 | 2.9375106e-40  | 3.0221978e-65 | 0.054680911 |
| P50247  | Ahcy      | Adenosylhomocysteinase                                                      | 1277.03 | 48.15 | 47688  | 19 | 0.03561447 | 1.538857518 | 0.1353919  | 5.0937114e-40  | 5.7120244e-65 | 0.054781297 |
| P97834  | Gps1      | COP9 signalosome complex subunit 1                                          | 267.39  | 15.07 | 53428  | 6  | 0.03579633 | 1.556291446 | 0.13553612 | 8.8186996e-40  | 1.0776439e-64 | 0.054839652 |
| P60521  | Gabarrpl2 | Gamma-aminobutyric acid receptor-associated protein-like 2                  | 179.61  | 36.75 | 13667  | 4  | 0.03580816 | 2.230807005 | 0.13553612 | 1.5243677e-39  | 2.028304e-64  | 0.054839652 |
| Q6MG61  | Clic1     | Chloride intracellular channel protein 1                                    | 1265.48 | 61.41 | 26981  | 19 | 0.03583151 | 1.57434316  | 0.13553612 | 2.6308103e-39  | 3.8139365e-64 | 0.054839652 |
| Q8BQ30  | Ppp1r18   | Phostensin                                                                  | 268.35  | 10.94 | 65630  | 6  | 0.0358423  | 1.348138476 | 0.13553612 | 4.5331868e-39  | 7.163987e-64  | 0.054839652 |
| Q9CXF4  | Tbc1d15   | TBC1 domain family member 15                                                | 169.02  | 4.02  | 76527  | 3  | 0.03609488 | 2.078494358 | 0.13631068 | 7.7988688e-39  | 1.3443768e-63 | 0.05515305  |
| Q9DBQ7  | Scyl3     | Protein-associating with the carboxyl-terminal domain of ezrin              | 38.24   | 1.5   | 81333  | 1  | 0.0362538  | 7.357021037 | 0.13667778 | 1.339594e-38   | 2.5154579e-63 | 0.055301584 |
| A2AN08  | Ubr4      | E3 ubiquitin-protein ligase UBR4                                            | 309.76  | 1.31  | 572290 | 5  | 0.03628783 | 2.219892443 | 0.13667778 | 2.2973544e-38  | 4.6965577e-63 | 0.055301584 |
| Q9CQJ2  | Pih1d1    | PIH1 domain-containing protein 1                                            | 83.14   | 10.69 | 32209  | 2  | 0.03646495 | 1.89456043  | 0.13716395 | 3.9336494e-38  | 8.7588724e-63 | 0.055498295 |
| Q01405  | Sec23a    | Protein transport protein Sec23A                                            | 220.37  | 8.89  | 86162  | 4  | 0.03668994 | 2.103047886 | 0.13782866 | 6.7247452e-38  | 1.6297647e-62 | 0.055767244 |
| P11438  | Lamp1     | Lysosome-associated membrane glycoprotein 1                                 | 538.1   | 18.72 | 43865  | 8  | 0.03705229 | 1.166319535 | 0.1388315  | 1.1478052e-37  | 3.0244733e-62 | 0.056173007 |
| Q6P6S4  | Sil1      | Nucleotide exchange factor SIL1                                             | 49.28   | 1.72  | 52350  | 1  | 0.03705415 | 2.457252953 | 0.1388315  | 1.9560157e-37  | 5.5919294e-62 | 0.056173007 |
| P47809  | Map2k4    | Dual specificity mitogen-activated protein kinase kinase 4                  | 60.38   | 4.28  | 44114  | 1  | 0.03718528 | 1.782791091 | 0.1391402  | 3.3280354e-37  | 1.0329913e-61 | 0.056297909 |
| Q9CYA0  | Creld2    | Cysteine-rich with EGF-like domain protein 2                                | 150.97  | 12    | 38220  | 3  | 0.03724787 | 2.829022497 | 0.13919197 | 5.6534641e-37  | 1.9046531e-61 | 0.056318857 |
| P16409  | Myl3      | Myosin light chain 3                                                        | 92.24   | 12    | 22156  | 2  | 0.03738266 | 1.970710733 | 0.13951307 | 9.588531e-37   | 3.5071374e-61 | 0.056448777 |
| Q64514  | Tpp2      | Tripeptidyl-peptidase 2                                                     | 987.35  | 24.25 | 139879 | 19 | 0.03752324 | 1.601627505 | 0.13985491 | 1.6236779e-36  | 6.4456304e-61 | 0.056587089 |
| Q60749  | Khdrbs1   | KH domain-containing, RNA-binding, signal transduction-associated protein 1 | 141.85  | 16.48 | 48371  | 4  | 0.03776413 | 0.751902132 | 0.14056923 | 2.7450972e-36  | 1.1823259e-60 | 0.056876114 |
| Q9D338  | Mrpl19    | 39S ribosomal protein L19, mitochondrial                                    | 249.54  | 15.07 | 33578  | 5  | 0.03790645 | 0.804453807 | 0.14091526 | 4.6336712e-36  | 2.162912e-60  | 0.05701612  |
| P09528  | Fth1      | Ferritin heavy chain                                                        | 51.69   | 3.85  | 21067  | 1  | 0.03803433 | 1.505713126 | 0.14099877 | 7.8091183e-36  | 3.9491368e-60 | 0.057049911 |
| P12382  | Pfk1      | ATP-dependent 6-phosphofructokinase, liver type                             | 754.16  | 21.67 | 85360  | 13 | 0.03805607 | 1.47055124  | 0.14099877 | 1.3139769e-35  | 7.1974295e-60 | 0.057049911 |
| Q5U216  | Ddx39a    | ATP-dependent RNA helicase DDX39A                                           | 1069.77 | 50.12 | 49109  | 19 | 0.03810256 | 1.376261303 | 0.14099877 | 2.207405e-35   | 1.3104284e-59 | 0.057049911 |
| P47754  | Capza2    | F-actin-capping protein subunit alpha-2                                     | 401.02  | 24.83 | 32967  | 7  | 0.03818559 | 1.406134161 | 0.14099877 | 3.7024101e-35  | 2.3830249e-59 | 0.057049911 |
| Q62698  | Dync1li2  | Cytoplasmic dynein 1 light intermediate chain 2                             | 284.19  | 13.08 | 54745  | 5  | 0.03822907 | 1.452767053 | 0.14099877 | 6.2000454e-35  | 4.3271749e-59 | 0.057049911 |

|         |         |                                                               |         |       |        |    |            |             |            |               |               |             |
|---------|---------|---------------------------------------------------------------|---------|-------|--------|----|------------|-------------|------------|---------------|---------------|-------------|
| P58252  | Eef2    | Elongation factor 2                                           | 3752.25 | 61.07 | 95314  | 58 | 0.0382772  | 1.524523049 | 0.14099877 | 1.0366036e-34 | 7.8481947e-59 | 0.057049911 |
| Q63413  | Ddx39b  | Spliceosome RNA helicase Ddx39b                               | 1416.09 | 64.02 | 49035  | 24 | 0.03829357 | 1.261969543 | 0.14099877 | 1.7303646e-34 | 1.4217046e-58 | 0.057049911 |
| Q62393  | Tpd52   | Tumor protein D52                                             | 191.8   | 16.07 | 24313  | 3  | 0.03840087 | 1.883210123 | 0.14099877 | 2.8838277e-34 | 2.5729151e-58 | 0.057049911 |
| Q9WV85  | Nme3    | Nucleoside diphosphate kinase 3                               | 75.17   | 10.06 | 19099  | 1  | 0.0384134  | 2.281036861 | 0.14099877 | 4.7985205e-34 | 4.6486342e-58 | 0.057049911 |
| Q99K48  | Nono    | Non-POU domain-containing octamer-binding protein             | 1396.54 | 55.39 | 54541  | 25 | 0.03842278 | 0.754070805 | 0.14099877 | 7.9717085e-34 | 8.3909989e-58 | 0.057049911 |
| P13020  | Gsn     | Gelsolin                                                      | 1715.16 | 48.85 | 85942  | 27 | 0.03853502 | 1.365912964 | 0.1411139  | 1.322212e-33  | 1.5132114e-57 | 0.057096493 |
| Q3UMB9  | Washc4  | WASH complex subunit 4                                        | 106.43  | 1.11  | 136370 | 2  | 0.03858686 | 2.472753307 | 0.1411139  | 2.1895559e-33 | 2.7242992e-57 | 0.057096493 |
| B5DF89  | Cul3    | Cullin-3                                                      | 174.39  | 9.51  | 88932  | 4  | 0.03862098 | 2.826804247 | 0.1411139  | 3.620061e-33  | 4.8986046e-57 | 0.057096493 |
| Q8BV14  | Qdpr    | Dihydropteridine reductase                                    | 199.9   | 26.56 | 25570  | 4  | 0.0386828  | 1.632144203 | 0.1411139  | 5.9755825e-33 | 8.7984954e-57 | 0.057096493 |
| O08553  | Dpysl2  | Dihydropyrimidinase-related protein 2                         | 1562.05 | 53.5  | 62278  | 23 | 0.03870129 | 1.191981609 | 0.1411139  | 9.8480162e-33 | 1.5782475e-56 | 0.057096493 |
| Q91YX0  | Themis2 | Protein THEMIS2                                               | 143.98  | 4.52  | 74378  | 2  | 0.03897686 | 1.806801444 | 0.14193741 | 1.6203955e-32 | 2.8281927e-56 | 0.057429695 |
| P32233  | Drg1    | Developmentally-regulated GTP-binding protein 1               | 303.57  | 16.08 | 40512  | 5  | 0.03923894 | 1.548571108 | 0.14257588 | 2.6619304e-32 | 5.0536485e-56 | 0.057688028 |
| P52633  | Stat6   | Signal transducer and transcription activator 6               | 124.14  | 4.06  | 93497  | 3  | 0.03925206 | 2.135317768 | 0.14257588 | 4.365916e-32  | 9.0056326e-56 | 0.057688028 |
| Q5BJP6  | Gfm2    | Ribosome-releasing factor 2, mitochondrial                    | 76.57   | 2.7   | 85914  | 2  | 0.03941526 | 1.941171833 | 0.14298674 | 7.1491876e-32 | 1.6032859e-55 | 0.057854271 |
| Q6AXS5  | Serbp1  | Plasminogen activator inhibitor 1 RNA-binding protein         | 750.73  | 43.24 | 44754  | 14 | 0.03951473 | 1.492754673 | 0.1430867  | 1.1688002e-31 | 2.8486107e-55 | 0.057894712 |
| Q91X52  | Dcxr    | L-xylulose reductase                                          | 44.07   | 4.51  | 25746  | 1  | 0.03955561 | 1.641702934 | 0.1430867  | 1.9077688e-31 | 5.0533426e-55 | 0.057894712 |
| Q04447  | Ckb     | Creatine kinase B-type                                        | 1790.38 | 66.4  | 42713  | 25 | 0.03959317 | 1.513479652 | 0.1430867  | 3.1089427e-31 | 8.9542164e-55 | 0.057894712 |
| Q2YDW2  | Msto1   | Protein misato homolog 1                                      | 135.72  | 5.22  | 61230  | 3  | 0.03967403 | 1.786682636 | 0.14319766 | 5.0582559e-31 | 1.5848549e-54 | 0.057939611 |
| P62830  | Rpl23   | 60S ribosomal protein L23                                     | 558.84  | 61.43 | 14865  | 9  | 0.03980129 | 1.264982526 | 0.14347562 | 8.2165524e-31 | 2.8011278e-54 | 0.058052078 |
| P47713  | Pla2g4a | Cytosolic phospholipase A2                                    | 290.87  | 10.56 | 85222  | 6  | 0.03986666 | 1.43684647  | 0.14353003 | 1.3325356e-30 | 4.9421813e-54 | 0.058074092 |
| P07356  | Anxa2   | Annexin A2                                                    | 1472.16 | 72.27 | 38676  | 26 | 0.04012568 | 0.824899479 | 0.14425306 | 2.1575853e-30 | 8.7083256e-54 | 0.058366638 |
| Q9CPS7  | Pno1    | RNA-binding protein PNO1                                      | 292.98  | 38.31 | 27454  | 7  | 0.04017384 | 1.592975039 | 0.14425306 | 3.4878413e-30 | 1.5303928e-53 | 0.058366638 |
| P37996  | Arl3    | ADP-ribosylation factor-like protein 3                        | 191.8   | 25.82 | 20457  | 4  | 0.04021907 | 2.221767372 | 0.14425306 | 5.6291738e-30 | 2.6863093e-53 | 0.058366638 |
| Q8VCN5  | Cth     | Cystathionine gamma-lyase                                     | 407.83  | 22.61 | 43567  | 7  | 0.04028802 | 1.528737481 | 0.14431908 | 9.0705041e-30 | 4.7098008e-53 | 0.058393349 |
| Q91VU7  | Pus7    | Pseudouridylate synthase 7 homolog                            | 118.04  | 6.52  | 74793  | 3  | 0.04041366 | 2.215728067 | 0.14449338 | 1.459206e-29  | 8.2465488e-53 | 0.058463874 |
| Q9CQM5  | Txndc17 | Thioredoxin domain-containing protein 17                      | 175.45  | 43.9  | 14015  | 5  | 0.04051021 | 1.92085276  | 0.14449338 | 2.3436883e-29 | 1.4414476e-52 | 0.058463874 |
| Q61036  | Pak3    | Serine/threonine-protein kinase PAK 3                         | 417.75  | 13.95 | 62398  | 7  | 0.04052632 | 1.633394334 | 0.14449338 | 3.7582074e-29 | 2.5157616e-52 | 0.058463874 |
| O35343  | Kpna4   | Importin subunit alpha-3                                      | 216.89  | 7.1   | 57923  | 2  | 0.04053912 | 1.747565666 | 0.14449338 | 6.0167075e-29 | 4.3865173e-52 | 0.058463874 |
| P83868  | Ptges3  | Prostaglandin E synthase 3                                    | 99.75   | 18.75 | 18721  | 2  | 0.04071934 | 1.7940601   | 0.14495477 | 9.616874e-29  | 7.6411517e-52 | 0.058650557 |
| Q7M0E3  | Dstn    | Destrin                                                       | 579.56  | 56.36 | 18534  | 10 | 0.04117704 | 1.319754244 | 0.14629103 | 1.5346362e-28 | 1.3283112e-51 | 0.059191227 |
| Q6R5N8  | Tlr13   | Toll-like receptor 13                                         | 197.08  | 5.95  | 114443 | 4  | 0.04119719 | 1.914494797 | 0.14629103 | 2.4449672e-28 | 2.3001233e-51 | 0.059191227 |
| Q61656  | Ddx5    | Probable ATP-dependent RNA helicase DDX5                      | 1979.67 | 53.58 | 69290  | 35 | 0.0412524  | 1.141456585 | 0.14630508 | 3.8889856e-28 | 3.9790029e-51 | 0.059196913 |
| Q8CGC7  | Eprs    | Bifunctional glutamate/proline--tRNA ligase                   | 2295.82 | 34.06 | 170079 | 37 | 0.04137631 | 1.234981039 | 0.14647731 | 6.1758244e-28 | 6.8749397e-51 | 0.059266597 |
| P70677  | Casp3   | Caspase-3                                                     | 354.9   | 25.63 | 31475  | 6  | 0.04140357 | 1.581020251 | 0.14647731 | 9.7914824e-28 | 1.1858792e-50 | 0.059266597 |
| Q8BVE3  | Atp6v1h | V-type proton ATPase subunit H                                | 268.1   | 13.04 | 55855  | 5  | 0.04146795 | 1.366607195 | 0.14652353 | 1.5498743e-27 | 2.0434467e-50 | 0.059285298 |
| Q91V12  | Acot7   | Cytosolic acyl coenzyme A thioester hydrolase                 | 406.28  | 29.66 | 42537  | 8  | 0.04156825 | 1.590833117 | 0.1466563  | 2.449281e-27  | 3.5166766e-50 | 0.059339022 |
| Q80ZK0  | Mtprs10 | 28S ribosomal protein S10, mitochondrial                      | 48.64   | 11.25 | 18698  | 1  | 0.04160827 | 1.592797033 | 0.1466563  | 3.8643323e-27 | 6.0429269e-50 | 0.059339022 |
| Q8VEE0  | Rpe     | Ribulose-phosphate 3-epimerase                                | 100.14  | 8.33  | 24945  | 1  | 0.0417586  | 2.778025976 | 0.14700469 | 6.0870049e-27 | 1.0372359e-49 | 0.059479982 |
| Q9DCB8  | Isca2   | Iron-sulfur cluster assembly 2 homolog, mitochondrial         | 99.04   | 20.78 | 16718  | 2  | 0.04202003 | 2.807446657 | 0.14774286 | 9.5725085e-27 | 1.7771155e-49 | 0.059778654 |
| O35887  | Calu    | Calumenin                                                     | 154.25  | 18.73 | 37064  | 3  | 0.04208812 | 1.933088652 | 0.14780022 | 1.5029357e-26 | 3.0370905e-49 | 0.059801865 |
| Q922Y1  | Ubxn1   | UBX domain-containing protein 1                               | 308.68  | 19.53 | 33573  | 5  | 0.04215537 | 1.895553703 | 0.14785451 | 2.3558474e-26 | 5.1837147e-49 | 0.059823833 |
| P21107  | Tpm3    | Tropomyosin alpha-3 chain                                     | 568.34  | 22.46 | 32994  | 10 | 0.04228981 | 1.816894973 | 0.14796849 | 3.6867665e-26 | 8.8362568e-49 | 0.059869948 |
| Q5FWK3  | Arhgap1 | Rho GTPase-activating protein 1                               | 140.86  | 7.06  | 50411  | 2  | 0.04229152 | 9.597079275 | 0.14796849 | 5.7601717e-26 | 1.5036836e-48 | 0.059869948 |
| P58681  | Tlr7    | Toll-like receptor 7                                          | 118.74  | 2.29  | 121837 | 2  | 0.04239818 | 2.610406782 | 0.1481601  | 8.98496e-26   | 2.556631e-48  | 0.059947477 |
| Q00519  | Xdh     | Xanthine dehydrogenase/oxidase                                | 738.76  | 15.43 | 146562 | 13 | 0.04245798 | 1.358740684 | 0.14818769 | 1.3992244e-25 | 4.3402777e-48 | 0.059958641 |
| Q9CR95  | Necap1  | Adaptin ear-binding coat-associated protein 1                 | 132.55  | 17.45 | 29639  | 2  | 0.04261839 | 1.824465749 | 0.14820877 | 2.1754481e-25 | 7.3592331e-48 | 0.059967168 |
| P54276  | Msh6    | DNA mismatch repair protein Msh6                              | 104.05  | 2.5   | 151084 | 2  | 0.04266101 | 2.287062593 | 0.14820877 | 3.3767568e-25 | 1.2454975e-47 | 0.059967168 |
| Q8CCCH2 | Nhlrc3  | NHL repeat-containing protein 3                               | 379.18  | 26.8  | 38195  | 6  | 0.0426643  | 1.572714598 | 0.14820877 | 5.2328723e-25 | 2.1055533e-47 | 0.059967168 |
| Q9Z2U1  | Psma5   | Proteasome subunit alpha type-5                               | 578.05  | 47.72 | 26411  | 8  | 0.04267167 | 1.449506859 | 0.14820877 | 8.0959792e-25 | 3.5563742e-47 | 0.059967168 |
| Q9DBC7  | Prkar1a | cAMP-dependent protein kinase type I-alpha regulatory subunit | 449.12  | 22.57 | 43185  | 8  | 0.04283384 | 1.460675223 | 0.14849892 | 1.2505099e-24 | 6.0014282e-47 | 0.060084567 |
| P70697  | Urod    | Uroporphyrinogen decarboxylase                                | 325.71  | 25.89 | 40692  | 6  | 0.0428773  | 1.292094312 | 0.14849892 | 1.9283814e-24 | 1.0108707e-46 | 0.060084567 |



|        |          |                                                              |         |       |        |    |            |             |            |               |               |             |
|--------|----------|--------------------------------------------------------------|---------|-------|--------|----|------------|-------------|------------|---------------|---------------|-------------|
| P17182 | Eno1     | Alpha-enolase                                                | 2960.96 | 79.26 | 47141  | 39 | 0.04291125 | 1.44789491  | 0.14849892 | 2.9688374e-24 | 1.700775e-46  | 0.060084567 |
| Q6NSR8 | Npepl1   | Probable aminopeptidase NPEPL1                               | 286.72  | 11.83 | 55940  | 5  | 0.04296953 | 2.031500998 | 0.14852058 | 4.5631754e-24 | 2.8584668e-46 | 0.060093333 |
| Q6AYT3 | Rtcb     | tRNA-splicing ligase RtcB homolog                            | 415.91  | 23.56 | 55249  | 9  | 0.04304905 | 1.572700866 | 0.14861553 | 7.0022041e-24 | 4.7983291e-46 | 0.060131751 |
| P61087 | Ube2k    | Ubiquitin-conjugating enzyme E2 K                            | 373.07  | 50.5  | 22407  | 7  | 0.04351856 | 1.655771364 | 0.14999981 | 1.072726e-23  | 8.0438114e-46 | 0.060691845 |
| P20611 | Acp2     | Lysosomal acid phosphatase                                   | 119.29  | 4.49  | 48320  | 2  | 0.04364179 | 2.476270316 | 0.14999981 | 1.6406988e-23 | 1.3434957e-45 | 0.060691845 |
| P63245 | Rack1    | Receptor of activated protein C kinase 1                     | 1567.29 | 81.07 | 35077  | 26 | 0.04371634 | 1.456658379 | 0.14999981 | 2.5052701e-23 | 2.24037e-45   | 0.060691845 |
| Q4KM92 | Pus1     | tRNA pseudouridine synthase A                                | 56.88   | 2.36  | 47515  | 1  | 0.04372878 | 2.020361068 | 0.14999981 | 3.8191388e-23 | 3.7311156e-45 | 0.060691845 |
| P63168 | Dynl1    | Dynein light chain 1, cytoplasmic                            | 36.26   | 12.36 | 10366  | 1  | 0.04376004 | 1.750324181 | 0.14999981 | 5.8124753e-23 | 6.2080088e-45 | 0.060691845 |
| Q9CZ30 | Ola1     | Obg-like ATPase 1                                            | 564.72  | 28.03 | 44730  | 9  | 0.04379448 | 1.74518376  | 0.14999981 | 8.8316362e-23 | 1.0318385e-44 | 0.060691845 |
| Q9ER72 | Cars     | Cysteine--tRNA ligase, cytoplasmic                           | 507.15  | 14.56 | 94860  | 9  | 0.04383337 | 1.864716118 | 0.14999981 | 1.3396927e-22 | 1.713201e-44  | 0.060691845 |
| P80316 | Cct5     | T-complex protein 1 subunit epsilon                          | 1538.34 | 51.2  | 59624  | 25 | 0.04387035 | 1.459222024 | 0.14999981 | 2.0288631e-22 | 2.8413865e-44 | 0.060691845 |
| Q9D706 | Rpap3    | RNA polymerase II-associated protein 3                       | 131.8   | 4.39  | 74096  | 2  | 0.04398423 | 2.189174219 | 0.15020932 | 3.067492e-22  | 4.7074114e-44 | 0.060776617 |
| Q09200 | B4galnt1 | Beta-1,4 N-acetylgalactosaminyltransferase 1                 | 113.11  | 9.94  | 59212  | 3  | 0.04420314 | 0.718873137 | 0.15077653 | 4.630169e-22  | 7.7869864e-44 | 0.061006116 |
| Q9Z0G0 | Gipc1    | PDZ domain-containing protein GIPC1                          | 108.48  | 8.71  | 36129  | 2  | 0.04444258 | 2.759900961 | 0.15141237 | 6.9773826e-22 | 1.2853764e-43 | 0.061263387 |
| P84228 | Hist1h3b | Histone H3.2                                                 | 804.84  | 61.76 | 15388  | 11 | 0.04458144 | 0.39974697  | 0.15162398 | 1.0497119e-21 | 2.116989e-43  | 0.061349008 |
| Q3UM45 | Ppp1r7   | Protein phosphatase 1 regulatory subunit 7                   | 1027.28 | 55.12 | 41292  | 17 | 0.04461091 | 1.95425902  | 0.15162398 | 1.5766277e-21 | 3.4808736e-43 | 0.061349008 |
| Q6PCT3 | Tpd52l2  | Tumor protein D54                                            | 361.36  | 32.73 | 23992  | 6  | 0.04476269 | 3.412201994 | 0.15195895 | 2.3641184e-21 | 5.7175592e-43 | 0.061484538 |
| Q9EST4 | Psmg2    | Proteasome assembly chaperone 2                              | 145.19  | 10.98 | 29524  | 4  | 0.0449341  | 2.181107472 | 0.1522159  | 3.5390761e-21 | 9.375294e-43  | 0.061588504 |
| Q61210 | Arhgef1  | Rho guanine nucleotide exchange factor 1                     | 523.33  | 12.83 | 102805 | 9  | 0.04494501 | 1.301702031 | 0.1522159  | 5.2892098e-21 | 1.5344948e-42 | 0.061588504 |
| Q62084 | Ppp1r14b | Protein phosphatase 1 regulatory subunit 14B                 | 43.38   | 17.01 | 15957  | 1  | 0.04511261 | 1.936415556 | 0.15248347 | 7.8917163e-21 | 2.5092567e-42 | 0.061696768 |
| P12970 | Rpl7a    | 60S ribosomal protein L7a                                    | 1176.68 | 53.76 | 29977  | 20 | 0.045144   | 1.320668753 | 0.15248347 | 1.175524e-20  | 4.0958424e-42 | 0.061696768 |
| Q91VD9 | Ndufs1   | NADH-ubiquinone oxidoreductase 75 kDa subunit, mitochondrial | 703.16  | 25.45 | 79777  | 15 | 0.04526031 | 0.846885175 | 0.15248347 | 1.7481168e-20 | 6.6786841e-42 | 0.061696768 |
| P48758 | Cbr1     | Carbonyl reductase [NADPH] 1                                 | 218.57  | 23.1  | 30641  | 6  | 0.04529502 | 1.722427533 | 0.15248347 | 2.595302e-20  | 1.087385e-41  | 0.061696768 |
| Q3TIU4 | Pde12    | 2',5'-phosphodiesterase 12                                   | 76.18   | 4.11  | 67514  | 2  | 0.04533644 | 2.056323192 | 0.15248347 | 3.846657e-20  | 1.7685495e-41 | 0.061696768 |
| P30999 | Ctnnd1   | Catenin delta-1                                              | 200.81  | 6.18  | 104925 | 5  | 0.04534447 | 2.748995796 | 0.15248347 | 5.6918924e-20 | 2.8732671e-41 | 0.061696768 |
| Q9D2Y4 | Mlkl     | Mixed lineage kinase domain-like protein                     | 67.31   | 2.97  | 54317  | 1  | 0.0454153  | 1.726567481 | 0.15254199 | 8.4082796e-20 | 4.6637886e-41 | 0.061720445 |
| P29595 | Nedd8    | NEDD8                                                        | 173.17  | 41.98 | 8972   | 3  | 0.04614172 | 1.660406996 | 0.15425436 | 1.2400364e-19 | 7.5605885e-41 | 0.062413294 |
| Q5XI13 | Grwd1    | Glutamate-rich WD repeat-containing protein 1                | 82.53   | 6.74  | 49169  | 2  | 0.04625158 | 1.744869727 | 0.15425436 | 1.8257364e-19 | 1.2197924e-40 | 0.062413294 |
| Q99J09 | Wdr77    | Methylosome protein 50                                       | 124.01  | 11.4  | 36943  | 3  | 0.04626939 | 1.958630481 | 0.15425436 | 2.6835996e-19 | 1.9651167e-40 | 0.062413294 |
| Q9DBR1 | Xrn2     | 5'-3' exoribonuclease 2                                      | 869.56  | 21.14 | 108687 | 16 | 0.04636489 | 1.182641771 | 0.15425436 | 3.9379744e-19 | 3.1628392e-40 | 0.062413294 |
| P23514 | Copb1    | Coatamer subunit beta                                        | 657.7   | 17.52 | 107011 | 13 | 0.04642483 | 1.762064478 | 0.15425436 | 5.7690349e-19 | 5.083607e-40  | 0.062413294 |
| Q9JK81 | Myg1     | UPF0160 protein MYG1, mitochondrial                          | 436.13  | 21.32 | 42723  | 7  | 0.04646068 | 1.591147986 | 0.15425436 | 8.4373901e-19 | 8.1612266e-40 | 0.062413294 |
| Q9CY14 | Luc7l    | Putative RNA-binding protein Luc7-like 1                     | 135.46  | 7.82  | 43934  | 3  | 0.04647774 | 1.419404529 | 0.15425436 | 1.2319338e-18 | 1.3088284e-39 | 0.062413294 |
| P17047 | Lamp2    | Lysosome-associated membrane glycoprotein 2                  | 373.35  | 14.46 | 45681  | 7  | 0.04649744 | 1.47884357  | 0.15425436 | 1.7957274e-18 | 2.09699e-39   | 0.062413294 |
| Q9CQM9 | Glxr3    | Glutaredoxin-3                                               | 479.38  | 30.56 | 37778  | 8  | 0.04651796 | 1.381450288 | 0.15425436 | 2.6131652e-18 | 3.356522e-39  | 0.062413294 |
| Q8C0E2 | Vps26b   | Vacuolar protein sorting-associated protein 26B              | 159.01  | 9.23  | 39125  | 3  | 0.04654577 | 1.786911594 | 0.15425436 | 3.7963505e-18 | 5.3673456e-39 | 0.062413294 |
| Q9EQ80 | Nif3l1   | NIF3-like protein 1                                          | 368.02  | 19.95 | 41746  | 7  | 0.04655195 | 1.666720587 | 0.15425436 | 5.5060262e-18 | 8.574113e-39  | 0.062413294 |
| Q9ER81 | Tor1aip2 | Torsin-1A-interacting protein 2, isoform IFRG15              | 61.39   | 10.69 | 15278  | 1  | 0.04659876 | 1.750912823 | 0.15425436 | 7.9722768e-18 | 1.3684434e-38 | 0.062413294 |
| P60122 | Ruvb1l   | RuvB-like 1                                                  | 962.43  | 46.05 | 50214  | 17 | 0.04664156 | 1.196088929 | 0.15425436 | 1.1523865e-17 | 2.1816227e-38 | 0.062413294 |
| P62082 | Rps7     | 40S ribosomal protein S7                                     | 473.09  | 40.21 | 22127  | 9  | 0.04673078 | 1.28179053  | 0.15425436 | 1.662973e-17  | 3.4742124e-38 | 0.062413294 |
| Q8K183 | Pdxk     | Pyridoxal kinase                                             | 258.76  | 17.31 | 35015  | 5  | 0.04673556 | 2.122187282 | 0.15425436 | 2.3957586e-17 | 5.5252561e-38 | 0.062413294 |
| Q9CPT4 | Mydgf    | Myeloid-derived growth factor                                | 112.19  | 16.27 | 17982  | 2  | 0.04700819 | 2.159575484 | 0.15497502 | 3.4456513e-17 | 8.7792461e-38 | 0.062704882 |
| Q62418 | Dbnl     | Drebrin-like protein                                         | 700.57  | 32.34 | 48700  | 10 | 0.047234   | 1.309333036 | 0.15506931 | 4.9473149e-17 | 1.3917882e-37 | 0.062743031 |
| P35564 | Canx     | Calnexin                                                     | 1249.29 | 39.09 | 67278  | 21 | 0.04724129 | 0.836420154 | 0.15506931 | 7.0914872e-17 | 2.2019612e-37 | 0.062743031 |
| Q99L47 | St13     | Hsc70-interacting protein                                    | 396.37  | 22.64 | 41656  | 8  | 0.04734371 | 1.60315235  | 0.15506931 | 1.0147854e-16 | 3.4805757e-37 | 0.062743031 |
| P97376 | Frg1     | Protein FRG1                                                 | 73.39   | 5.04  | 29127  | 1  | 0.04734874 | 1.716504659 | 0.15506931 | 1.4497054e-16 | 5.4939888e-37 | 0.062743031 |
| Q91YE6 | Ipo9     | Importin-9                                                   | 336.01  | 8.84  | 116052 | 7  | 0.04737175 | 1.522953766 | 0.15506931 | 2.0675383e-16 | 8.6642963e-37 | 0.062743031 |
| O08810 | Eftud2   | 116 kDa U5 small nuclear ribonucleoprotein component         | 933.4   | 25.23 | 109361 | 19 | 0.04745569 | 1.498695761 | 0.15506931 | 2.943711e-16  | 1.3650465e-36 | 0.062743031 |
| P70248 | Myo1f    | Unconventional myosin-1f                                     | 294.48  | 6.01  | 125947 | 7  | 0.04749891 | 1.542011702 | 0.15506931 | 4.1841204e-16 | 2.1478158e-36 | 0.062743031 |
| P54726 | Rad23a   | UV excision repair protein RAD23 homolog A                   | 282.73  | 20.66 | 39706  | 4  | 0.04754148 | 1.870938269 | 0.15506931 | 5.9371787e-16 | 3.3757527e-36 | 0.062743031 |
| P99027 | Rplp2    | 60S acidic ribosomal protein P2                              | 263.26  | 62.61 | 11651  | 3  | 0.04754787 | 1.828150087 | 0.15506931 | 8.4105151e-16 | 5.2999196e-36 | 0.062743031 |

|        |        |                                                                         |         |       |        |     |            |             |            |               |               |             |
|--------|--------|-------------------------------------------------------------------------|---------|-------|--------|-----|------------|-------------|------------|---------------|---------------|-------------|
| P63328 | Ppp3ca | Serine/threonine-protein phosphatase 2B catalytic subunit alpha isoform | 374.49  | 16.51 | 58644  | 7   | 0.04757993 | 1.483485546 | 0.15506931 | 1.1894088e-15 | 8.3132428e-36 | 0.062743031 |
| P62852 | Rps25  | 40S ribosomal protein S25                                               | 299.9   | 29.6  | 13742  | 5   | 0.0476889  | 1.55594781  | 0.1552021  | 1.6792114e-15 | 1.3026209e-35 | 0.062796761 |
| Q3U1J4 | Ddb1   | DNA damage-binding protein 1                                            | 1471.32 | 31.49 | 126853 | 28  | 0.0477294  | 1.286665768 | 0.1552021  | 2.3667089e-15 | 2.0382001e-35 | 0.062796761 |
| P53564 | Cux1   | Homeobox protein cut-like 1                                             | 56.26   | 0.59  | 165596 | 1   | 0.04781955 | 4.90156058  | 0.15531833 | 3.3300372e-15 | 3.185691e-35  | 0.062843787 |
| P61027 | Rab10  | Ras-related protein Rab-10                                              | 504.11  | 34    | 22541  | 8   | 0.0482625  | 0.619717495 | 0.15647422 | 4.6775421e-15 | 4.9725891e-35 | 0.063311478 |
| D3ZZW6 | Hils1  | Spermatid-specific linker histone H1-like protein                       | 37.27   | 4.14  | 18617  | 1   | 0.04828504 | 1.975916751 | 0.15647422 | 6.5591908e-15 | 7.7382132e-35 | 0.063311478 |
| Q91ZX7 | Lrp1   | Prolow-density lipoprotein receptor-related protein 1                   | 6453.88 | 32.48 | 504742 | 109 | 0.04853226 | 0.736777785 | 0.15709706 | 9.182191e-15  | 1.2030068e-34 | 0.063563484 |
| Q91ZR2 | Snx18  | Sorting nexin-18                                                        | 184.15  | 8.63  | 67904  | 4   | 0.04860602 | 1.265927395 | 0.15715764 | 1.2832328e-14 | 1.8663621e-34 | 0.063587998 |
| P17095 | Hmga1  | High mobility group protein HMG-I/HMG-Y                                 | 98.23   | 23.36 | 11614  | 2   | 0.04871008 | 0.733217113 | 0.1572246  | 1.7903059e-14 | 2.8919293e-34 | 0.063615088 |
| O54950 | Prkag1 | 5'-AMP-activated protein kinase subunit gamma-1                         | 155.82  | 13.33 | 37520  | 3   | 0.04873687 | 1.820035084 | 0.1572246  | 2.4935108e-14 | 4.4748766e-34 | 0.063615088 |
| O88531 | Ppt1   | Palmitoyl-protein thioesterase 1                                        | 424.97  | 23.86 | 34490  | 6   | 0.04885753 | 1.456761241 | 0.15743594 | 3.4670255e-14 | 6.9172843e-34 | 0.0637006   |
| Q9WUK4 | Rfc2   | Replication factor C subunit 2                                          | 65.54   | 4.87  | 38725  | 2   | 0.04920598 | 2.270102051 | 0.1583059  | 4.8124274e-14 | 1.0677225e-33 | 0.064052599 |
| Q05D44 | Eif5b  | Eukaryotic translation initiation factor 5B                             | 662.45  | 18.83 | 137616 | 14  | 0.0492384  | 1.600624803 | 0.1583059  | 6.6685632e-14 | 1.6439462e-33 | 0.064052599 |
| Q99020 | Hnmpab | Heterogeneous nuclear ribonucleoprotein A/B                             | 674.26  | 35.09 | 30831  | 13  | 0.04944577 | 0.671898034 | 0.15865692 | 9.2248827e-14 | 2.528534e-33  | 0.064194623 |
| B0BNG0 | Emc2   | ER membrane protein complex subunit 2                                   | 242.95  | 17.51 | 34870  | 5   | 0.04945872 | 1.424028623 | 0.15865692 | 1.2739416e-13 | 3.8819447e-33 | 0.064194623 |
| Q8R1B4 | Eif3c  | Eukaryotic translation initiation factor 3 subunit C                    | 910.54  | 18.22 | 105531 | 16  | 0.04958901 | 1.406820809 | 0.15889631 | 1.7562964e-13 | 5.9541741e-33 | 0.064291486 |
| Q62885 | Unc119 | Protein unc-119 homolog A                                               | 107.48  | 9.17  | 27048  | 2   | 0.04988146 | 2.155063702 | 0.15965422 | 2.4171597e-13 | 9.119063e-33  | 0.064598144 |
| Q8BP40 | Acp6   | Lysophosphatidic acid phosphatase type 6                                | 274.33  | 20.33 | 47625  | 6   | 0.04999409 | 1.341226956 | 0.15983552 | 3.3210213e-13 | 1.3935274e-32 | 0.064671502 |
