# Supplementary material for: Does size matter? A proteomics-informed comparison of the effects of polystyrene beads of different sizes on macrophages
Source: Royal Society of Chemistry journal article supplement (doi:10.1039/d2en00214k), 2022-01-01
Supplement: d2en00214k10.pdf [file d2en00214k10.pdf]

Supplementary Table 3: list of proteins which abundance is significantly modified in response to cell exposure to 1 micrometer polystyrene particles

BH: false discovery rate according to Benjamini-Hochberg; SGoF: false discovery rate according to the sequential goodness of fit method; SFisher: false discovery rate according to the sequential Fisher method

| acc number | gene_name | description                                               | protein_set_score | coverage | MW (Da) | #peptides | T test 1 μm | Ratio 1μm/ctrl | B-I          | SGoF+ | SFisher | Q-value       |
|------------|-----------|-----------------------------------------------------------|-------------------|----------|---------|-----------|-------------|----------------|--------------|-------|---------|---------------|
| Q9WU78     | Pdcd6ip   | Programmed cell death 6-interacting protein               | 1129.38           | 31.07    | 96024   | 17        | 8.0088E-07  | 1.61100723     | 0.0022865056 | 0     | 0       | 0.00085946485 |
| Q9JKF1     | Iqgap1    | Ras GTPase-activating-like protein IQGAP1                 | 4641.94           | 51.84    | 188742  | 74        | 3.2205E-06  | 1.7360297      | 0.004597332  | 0     | 0       | 0.0017280715  |
| P56399     | Usp5      | Ubiquitin carboxyl-terminal hydrolase 5                   | 1049.75           | 30.42    | 95833   | 19        | 1.2742E-05  | 1.70188276     | 0.0094435303 | 0     | 0       | 0.0035496884  |
| Q8VVDJ3    | Hdlbp     | Vigilin                                                   | 1815.6            | 30.21    | 141743  | 31        | 1.5877E-05  | 1.55190654     | 0.0094435303 | 0     | 0       | 0.0035496884  |
| Q8BMT8     | Flna      | Filamin-A                                                 | 4874.93           | 41.48    | 281222  | 76        | 1.9165E-05  | 1.97347942     | 0.0094435303 | 0     | 0       | 0.0035496884  |
| P62192     | Psmc1     | 26S proteasome regulatory subunit 4                       | 390.91            | 17.05    | 49185   | 7         | 2.1103E-05  | 1.73080218     | 0.0094435303 | 0     | 0       | 0.0035496884  |
| Q1HFZ0     | Nsun2     | tRNA (cytosine(34)-C(5))-methyltransferase                | 493               | 18.49    | 85452   | 10        | 2.5119E-05  | 2.27331095     | 0.0094435303 | 0     | 0       | 0.0035496884  |
| Q61074     | Ppm1g     | Protein phosphatase 1G                                    | 272.87            | 11.25    | 58728   | 5         | 3.6924E-05  | 1.82391014     | 0.0094435303 | 0     | 0       | 0.0035496884  |
| Q8R491     | Ehd3      | EH domain-containing protein 3                            | 345.1             | 13.08    | 60791   | 7         | 3.7739E-05  | 2.20563171     | 0.0094435303 | 0     | 0       | 0.0035496884  |
| Q71LX4     | Tln2      | Talin-2                                                   | 594.96            | 3.75     | 253621  | 10        | 3.9602E-05  | 1.79939452     | 0.0094435303 | 0     | 0       | 0.0035496884  |
| Q5PPK9     | Eipr1     | EARP and GARP complex-interacting protein 1               | 38.64             | 3.37     | 43157   | 1         | 4.5395E-05  | 24.4642068     | 0.0094435303 | 0     | 0       | 0.0035496884  |
| Q5BJY6     | Amdhd2    | N-acetylglucosamine-6-phosphate deacetylase               | 148.98            | 8.31     | 43539   | 3         | 4.7918E-05  | 2.24541275     | 0.0094435303 | 0     | 0       | 0.0035496884  |
| P61982     | Ywhag     | 14-3-3 protein gamma                                      | 778.16            | 50.2     | 28303   | 14        | 5.5187E-05  | 3.30040113     | 0.0094435303 | 0     | 0       | 0.0035496884  |
| F1LMZ8     | Psmd11    | 26S proteasome non-ATPase regulatory subunit 11           | 740.08            | 34.36    | 47464   | 14        | 5.5729E-05  | 1.96156574     | 0.0094435303 | 0     | 0       | 0.0035496884  |
| B2RQC6     | Cad       | CAD protein                                               | 1068.65           | 13.98    | 243238  | 23        | 5.5793E-05  | 1.95505877     | 0.0094435303 | 0     | 0       | 0.0035496884  |
| Q5FVC2     | Arhgef2   | Rho guanine nucleotide exchange factor 2                  | 452.36            | 11.37    | 111909  | 8         | 5.9712E-05  | 1.43892932     | 0.0094435303 | 0     | 0       | 0.0035496884  |
| Q4KM73     | Cmpk1     | UMP-CMP kinase                                            | 380.87            | 47.45    | 22169   | 8         | 6.1307E-05  | 2.01510611     | 0.0094435303 | 0     | 0       | 0.0035496884  |
| P68254     | Ywhaq     | 14-3-3 protein theta                                      | 757.04            | 44.08    | 27778   | 12        | 6.3998E-05  | 3.97172384     | 0.0094435303 | 0     | 0       | 0.0035496884  |
| Q9QXS1     | Plec      | Plectin                                                   | 7877.069          | 38.39    | 534188  | 147       | 6.4825E-05  | 1.56663553     | 0.0094435303 | 0     | 0       | 0.0035496884  |
| Q6A0A9     | FAM120A   | Constitutive coactivator of PPAR-gamma-like protein 1     | 371.15            | 9.71     | 121646  | 8         | 6.7606E-05  | 1.52395975     | 0.0094435303 | 0     | 0       | 0.0035496884  |
| P63101     | Ywhaz     | 14-3-3 protein zeta/delta                                 | 956.45            | 48.98    | 27771   | 14        | 7.388E-05   | 2.84336312     | 0.0094435303 | 0     | 0       | 0.0035496884  |
| Q9CQV8     | Ywhab     | 14-3-3 protein beta/alpha                                 | 847.91            | 48.37    | 28086   | 13        | 7.4442E-05  | 3.74242923     | 0.0094435303 | 0     | 0       | 0.0035496884  |
| P68510     | Ywhah     | 14-3-3 protein eta                                        | 540.26            | 32.52    | 28212   | 10        | 8.3016E-05  | 4.21242647     | 0.0094435303 | 0     | 0       | 0.0035496884  |
| P11103     | Parp1     | Poly [ADP-ribose] polymerase 1                            | 976.93            | 25.77    | 113100  | 18        | 8.5782E-05  | 1.64702984     | 0.0094435303 | 0     | 0       | 0.0035496884  |
| O70456     | Sfn       | 14-3-3 protein sigma                                      | 158.96            | 12.1     | 27706   | 4         | 9.1009E-05  | 4.86969911     | 0.0094435303 | 0     | 0       | 0.0035496884  |
| Q6NZJ6     | Eif4g1    | Eukaryotic translation initiation factor 4 gamma 1        | 1620.48           | 22.81    | 176077  | 29        | 9.132E-05   | 1.81331346     | 0.0094435303 | 0     | 0       | 0.0035496884  |
| Q91VR5     | Ddx1      | ATP-dependent RNA helicase DDX1                           | 905.19            | 31.76    | 82500   | 16        | 9.1546E-05  | 1.8950926      | 0.0094435303 | 0     | 0       | 0.0035496884  |
| Q8BKZ9     | Pdhx      | Pyruvate dehydrogenase protein X component, mitochondrial | 104.79            | 3.39     | 53999   | 2         | 9.2616E-05  | 3.68147038     | 0.0094435303 | 0     | 0       | 0.0035496884  |
| A2AIV8     | Card9     | Caspase recruitment domain-containing protein 9           | 50.62             | 1.87     | 62462   | 1         | 0.00011003  | 7.03379854     | 0.010832383  | 0     | 0       | 0.0040717382  |
| Q9EQP2     | Ehd4      | EH domain-containing protein 4                            | 849.75            | 35.86    | 61481   | 17        | 0.00011797  | 2.09590951     | 0.011226423  | 0     | 0       | 0.0042198523  |
| P52293     | Kpna2     | Importin subunit alpha-1                                  | 1311.19           | 44.99    | 57928   | 19        | 0.00013263  | 1.52844409     | 0.011862522  | 0     | 0       | 0.0044589529  |
| Q9CZD3     | Gars      | Glycine--tRNA ligase                                      | 1137.19           | 32.92    | 81878   | 21        | 0.00013296  | 2.07370076     | 0.011862522  | 0     | 0       | 0.0044589529  |
| Q9D8T2     | Gsdmcd1   | Gasdermin-D                                               | 125.87            | 7.19     | 53238   | 3         | 0.00013879  | 2.2915925      | 0.011888679  | 0     | 0       | 0.0044687849  |
| Q8BJY1     | Psmd5     | 26S proteasome non-ATPase regulatory subunit 5            | 296.7             | 19.64    | 55972   | 7         | 0.00014158  | 2.84498042     | 0.011888679  | 0     | 0       | 0.0044687849  |
| Q6P542     | Abcf1     | ATP-binding cassette sub-family F member 1                | 418.04            | 13.62    | 94945   | 8         | 0.00015925  | 1.77599128     | 0.012990497  | 0     | 0       | 0.0048829427  |
| Q9JMA1     | Usp14     | Ubiquitin carboxyl-terminal hydrolase 14                  | 1176.23           | 50.71    | 56002   | 20        | 0.00016632  | 2.13344111     | 0.013190419  | 0     | 0       | 0.0049580905  |
| Q617R3     | Isoc1     | Isochorismatase domain-containing protein 1               | 115.24            | 8.42     | 32002   | 2         | 0.00017291  | 2.64186375     | 0.013342007  | 0     | 0       | 0.0050150702  |
| Q9CR16     | Ppid      | Peptidyl-prolyl cis-trans isomerase D                     | 365.23            | 17.3     | 40743   | 6         | 0.00019022  | 2.59762394     | 0.014291605  | 0     | 0       | 0.0053720105  |
| P26039     | Tln1      | Talin-1                                                   | 6208.992          | 49.82    | 269821  | 91        | 0.00019566  | 1.65167869     | 0.014323583  | 0     | 0       | 0.0053840307  |
| P62334     | Psmc6     | 26S proteasome regulatory subunit 10B                     | 593.05            | 30.85    | 44173   | 10        | 0.00021547  | 2.31903171     | 0.014577742  | 0     | 0       | 0.0054795652  |
| Q00422     | Gabpa     | GA-binding protein alpha chain                            | 82.78             | 3.96     | 51344   | 2         | 0.00021839  | 3.40862091     | 0.014577742  | 0     | 0       | 0.0054795652  |
| Q3UIA2     | Arhgap17  | Rho GTPase-activating protein 17                          | 126.71            | 2.6      | 92202   | 2         | 0.00021863  | 1.69824467     | 0.014577742  | 0     | 0       | 0.0054795652  |
| P42225     | Stat1     | Signal transducer and activator of transcription 1        | 206.83            | 6.54     | 87197   | 3         | 0.00021956  | 4.11852707     | 0.014577742  | 0     | 0       | 0.0054795652  |
| P99029     | Prdx5     | Peroxisome oxidin-5, mitochondrial                        | 730.88            | 57.14    | 21897   | 12        | 0.00023207  | 2.03440323     | 0.014733908  | 0     | 0       | 0.0055382659  |
| Q9ZIQ9     | Vars      | Valine--tRNA ligase                                       | 2117.74           | 37.53    | 140215  | 37        | 0.00023223  | 1.91381929     | 0.014733908  | 0     | 0       | 0.0055382659  |
| Q9ESH6     | Glrx      | Glutaredoxin-1                                            | 107.14            | 29.91    | 11879   | 3         | 0.00024223  | 2.32907707     | 0.015034112  | 0     | 0       | 0.0056511084  |
| P49962     | Srp9      | Signal recognition particle 9 kDa protein                 | 44.99             | 12.79    | 10194   | 1         | 0.00024891  | 4.88468117     | 0.015120233  | 0     | 0       | 0.00568348    |
| Q9CQM9     | Glrx3     | Glutaredoxin-3                                            | 479.38            | 30.56    | 37778   | 8         | 0.00026678  | 2.03046773     | 0.015478635  | 0     | 0       | 0.0058181982  |
| Q9CYR6     | Pgm3      | Phosphoacetylglucosamine mutase                           | 43.72             | 1.48     | 59453   | 1         | 0.00027476  | 6.45273758     | 0.015478635  | 0     | 0       | 0.0058181982  |
| Q9CZY3     | Ube2v1    | Ubiquitin-conjugating enzyme E2 variant 1                 | 398.85            | 36.05    | 16355   | 7         | 0.00027511  | 1.97070951     | 0.015478635  | 0     | 0       | 0.0058181982  |

|        |          |                                                                            |         |       |        |    |            |            |             |   |   |              |
|--------|----------|----------------------------------------------------------------------------|---------|-------|--------|----|------------|------------|-------------|---|---|--------------|
| Q1AAU6 | Asap1    | Arf-GAP with SH3 domain, ANK repeat and PH domain-containing protein 1     | 158.6   | 5.42  | 127088 | 3  | 0.00028003 | 2.36742577 | 0.015478635 | 0 | 0 | 0.0058181982 |
| P59328 | Wdhd1    | WD repeat and HMG-box DNA-binding protein 1                                | 159.33  | 4.3   | 124254 | 5  | 0.00028523 | 1.38040641 | 0.015478635 | 0 | 0 | 0.0058181982 |
| Q61510 | Trim25   | E3 ubiquitin/ISG15 ligase TRIM25                                           | 236.25  | 8.68  | 71726  | 4  | 0.00028734 | 2.75031349 | 0.015478635 | 0 | 0 | 0.0058181982 |
| Q8CFI2 | Cdc34    | Ubiquitin-conjugating enzyme E2 R1                                         | 34.63   | 2.98  | 26622  | 1  | 0.00030189 | 5.87799363 | 0.015716278 | 0 | 0 | 0.005907525  |
| Q91YI0 | Asl      | Argininosuccinate lyase                                                    | 446.52  | 23.28 | 51739  | 9  | 0.00030277 | 2.74060914 | 0.015716278 | 0 | 0 | 0.005907525  |
| Q8CGF7 | Tcerg1   | Transcription elongation regulator 1                                       | 350.65  | 7.18  | 123788 | 7  | 0.00031221 | 1.93553296 | 0.015917363 | 0 | 0 | 0.0059831098 |
| Q6P5F9 | Xpo1     | Exportin-1                                                                 | 608.3   | 12.23 | 123093 | 10 | 0.0003203  | 1.85073594 | 0.01596244  | 0 | 0 | 0.0060000537 |
| Q61749 | Eif2b4   | Translation initiation factor eIF-2B subunit delta                         | 211.27  | 9.92  | 57624  | 4  | 0.00032428 | 2.92507375 | 0.01596244  | 0 | 0 | 0.0060000537 |
| P19096 | Fasn     | Fatty acid synthase                                                        | 3753.07 | 37.9  | 272428 | 67 | 0.00033215 | 1.95658651 | 0.01607259  | 0 | 0 | 0.0060414573 |
| Q69ZK0 | Prex1    | Phosphatidylinositol 3,4,5-trisphosphate-dependent Rac exchanger 1 protein | 571.72  | 11.03 | 184935 | 13 | 0.00035493 | 2.49278647 | 0.016475138 | 0 | 0 | 0.0061927694 |
| Q8JZK9 | Hmgcs1   | Hydroxymethylglutaryl-CoA synthase, cytoplasmic                            | 388.81  | 21.54 | 57569  | 7  | 0.0003623  | 3.08209764 | 0.016475138 | 0 | 0 | 0.0061927694 |
| Q8BML9 | Qars     | Glutamine--tRNA ligase                                                     | 806.47  | 29.68 | 87677  | 18 | 0.00036798 | 1.68521947 | 0.016475138 | 0 | 0 | 0.0061927694 |
| Q99KC8 | Vwa5a    | von Willebrand factor A domain-containing protein 5A                       | 1687.11 | 45.4  | 87143  | 28 | 0.00037269 | 1.68486842 | 0.016475138 | 0 | 0 | 0.0061927694 |
| Q9R0P3 | Esd      | S-formylglutathione hydrolase                                              | 950.34  | 68.44 | 31320  | 14 | 0.00037422 | 1.67526692 | 0.016475138 | 0 | 0 | 0.0061927694 |
| P0DP26 | Calm1    | Calmodulin-1                                                               | 342.27  | 70.47 | 16838  | 5  | 0.00037835 | 3.40823433 | 0.016475138 | 0 | 0 | 0.0061927694 |
| P70168 | Kpnb1    | Importin subunit beta-1                                                    | 895.81  | 21.92 | 97184  | 16 | 0.00038455 | 1.38496811 | 0.016475138 | 0 | 0 | 0.0061927694 |
| Q9DBC7 | Prkar1a  | cAMP-dependent protein kinase type I-alpha regulatory subunit              | 449.12  | 22.57 | 43185  | 8  | 0.00038663 | 1.63937819 | 0.016475138 | 0 | 0 | 0.0061927694 |
| Q2PQA9 | Kif5b    | Kinesin-1 heavy chain                                                      | 638.44  | 14.43 | 109531 | 10 | 0.00040319 | 2.43308373 | 0.016852468 | 0 | 0 | 0.0063346025 |
| Q8BL66 | Eea1     | Early endosome antigen 1                                                   | 586.06  | 10.84 | 160915 | 12 | 0.00040729 | 1.82991378 | 0.016852468 | 0 | 0 | 0.0063346025 |
| P97386 | Lig3     | DNA ligase 3                                                               | 45.7    | 0.99  | 113072 | 1  | 0.0004214  | 4.8856587  | 0.01718701  | 0 | 0 | 0.0064603519 |
| Q9Z1G3 | Atp6v1c1 | V-type proton ATPase subunit C 1                                           | 516.22  | 26.18 | 43888  | 9  | 0.00043125 | 2.47400422 | 0.017341302 | 0 | 0 | 0.0065183482 |
| Q641Z6 | Ehd1     | EH domain-containing protein 1                                             | 685.35  | 33.52 | 60603  | 13 | 0.00045043 | 1.9894657  | 0.017598298 | 0 | 0 | 0.0066149495 |
| P46471 | Psmc2    | 26S proteasome regulatory subunit 7                                        | 958.45  | 38.11 | 48648  | 16 | 0.00045676 | 1.59143158 | 0.017598298 | 0 | 0 | 0.0066149495 |
| P17426 | Ap2a1    | AP-2 complex subunit alpha-1                                               | 767.87  | 23.64 | 107664 | 16 | 0.00048271 | 1.73992127 | 0.017598298 | 0 | 0 | 0.0066149495 |
| P23591 | Tsta3    | GDP-L-fucose synthase                                                      | 206.47  | 14.02 | 35878  | 4  | 0.00049312 | 4.19257283 | 0.017598298 | 0 | 0 | 0.0066149495 |
| Q8BPU7 | Elmo1    | Engulfment and cell motility protein 1                                     | 219.22  | 11.69 | 83936  | 6  | 0.00049949 | 3.49749669 | 0.017598298 | 0 | 0 | 0.0066149495 |
| P27546 | Map4     | Microtubule-associated protein 4                                           | 602.92  | 22.04 | 117429 | 15 | 0.00049979 | 1.73199516 | 0.017598298 | 0 | 0 | 0.0066149495 |
| Q91XU1 | Qki      | Protein quaking                                                            | 278.1   | 23.17 | 37643  | 5  | 0.00050254 | 1.5186154  | 0.017598298 | 0 | 0 | 0.0066149495 |
| Q9D2V7 | Coro7    | Coronin-7                                                                  | 438.61  | 16.49 | 100812 | 9  | 0.00050504 | 1.89814402 | 0.017598298 | 0 | 0 | 0.0066149495 |
| P45377 | Akr1b8   | Aldose reductase-related protein 2                                         | 863.46  | 55.7  | 36121  | 15 | 0.0005125  | 1.52763578 | 0.017598298 | 0 | 0 | 0.0066149495 |
| O70199 | Ugdh     | UDP-glucose 6-dehydrogenase                                                | 51.94   | 1.83  | 54892  | 1  | 0.00051761 | 5.49470452 | 0.017598298 | 0 | 0 | 0.0066149495 |
| P10518 | Alad     | Delta-aminolevulinic acid dehydratase                                      | 433.91  | 32.12 | 36024  | 7  | 0.00051783 | 2.68312291 | 0.017598298 | 0 | 0 | 0.0066149495 |
| O35127 | Grc10    | Protein C10                                                                | 38.07   | 14.29 | 13194  | 1  | 0.0005245  | 12.1591855 | 0.017598298 | 0 | 0 | 0.0066149495 |
| Q9D2M8 | Ube2v2   | Ubiquitin-conjugating enzyme E2 variant 2                                  | 408.32  | 41.38 | 16367  | 8  | 0.00053926 | 2.0664603  | 0.017598298 | 0 | 0 | 0.0066149495 |
| P54822 | Adsl     | Adenylosuccinate lyase                                                     | 755.65  | 37.4  | 54866  | 12 | 0.00054216 | 1.92710433 | 0.017598298 | 0 | 0 | 0.0066149495 |
| P02802 | Mt1      | Metallothionein-1                                                          | 108.88  | 55.74 | 6018   | 2  | 0.00054754 | 2.68204055 | 0.017598298 | 0 | 0 | 0.0066149495 |
| B0BN93 | Psm13    | 26S proteasome non-ATPase regulatory subunit 13                            | 355.53  | 21.01 | 42817  | 8  | 0.00054823 | 3.0741462  | 0.017598298 | 0 | 0 | 0.0066149495 |
| Q64105 | Spr      | Sepiapterin reductase                                                      | 763.56  | 59.39 | 27883  | 12 | 0.0005578  | 2.0902804  | 0.017598298 | 0 | 0 | 0.0066149495 |
| Q3U5F4 | Yrdc     | YrdC domain-containing protein, mitochondrial                              | 54.49   | 5     | 29454  | 1  | 0.00056143 | 16.8445368 | 0.017598298 | 0 | 0 | 0.0066149495 |
| P20171 | Hras     | GTPase HRas                                                                | 171.62  | 20.11 | 21298  | 3  | 0.00056221 | 0.58207744 | 0.017598298 | 0 | 0 | 0.0066149495 |
| Q3UZ39 | Lrrfp1   | Leucine-rich repeat flightless-interacting protein 1                       | 647.42  | 24.69 | 79249  | 12 | 0.00056818 | 1.71517977 | 0.017598298 | 0 | 0 | 0.0066149495 |
| Q8BUM3 | Ptpn7    | Tyrosine-protein phosphatase non-receptor type 7                           | 112.28  | 8.91  | 40351  | 2  | 0.00057152 | 3.38434311 | 0.017598298 | 0 | 0 | 0.0066149495 |
| Q9CYG7 | Tomm34   | Mitochondrial import receptor subunit TOM34                                | 300.82  | 26.54 | 34278  | 6  | 0.00057325 | 1.64963674 | 0.017598298 | 0 | 0 | 0.0066149495 |
| Q61879 | Myh10    | Myosin-10                                                                  | 1022.24 | 10.12 | 228996 | 19 | 0.00059234 | 1.61552388 | 0.017990695 | 0 | 0 | 0.0067624456 |
| Q6P5H2 | Nes      | Nestin                                                                     | 2852.46 | 35.3  | 207124 | 39 | 0.00060177 | 1.85194328 | 0.018051892 | 0 | 0 | 0.0067854489 |
| Q8BFT2 | Haus4    | HAUS augmin-like complex subunit 4                                         | 40.47   | 7.16  | 42197  | 1  | 0.00060917 | 8.23616149 | 0.018051892 | 0 | 0 | 0.0067854489 |
| B2RRE7 | Otud4    | OTU domain-containing protein 4                                            | 91.01   | 2.08  | 123055 | 2  | 0.00061332 | 7.84664184 | 0.018051892 | 0 | 0 | 0.0067854489 |
| P62259 | Ywhae    | 14-3-3 protein epsilon                                                     | 1078.54 | 63.92 | 29174  | 19 | 0.00064385 | 2.28970962 | 0.018524103 | 0 | 0 | 0.0069629461 |
| O35344 | Kpna3    | Importin subunit alpha-4                                                   | 219.47  | 9.21  | 57773  | 3  | 0.00064438 | 1.86730798 | 0.018524103 | 0 | 0 | 0.0069629461 |
| Q8R3C0 | Mcmbp    | Mini-chromosome maintenance complex-binding protein                        | 370.98  | 17.45 | 72891  | 7  | 0.00064883 | 2.26161631 | 0.018524103 | 0 | 0 | 0.0069629461 |
| P29391 | Ftl1     | Ferritin light chain 1                                                     | 538.2   | 49.18 | 20802  | 9  | 0.00067923 | 1.8660712  | 0.019200152 | 0 | 0 | 0.0072170634 |

|        |          |                                                                         |         |       |        |    |            |            |             |   |   |              |
|--------|----------|-------------------------------------------------------------------------|---------|-------|--------|----|------------|------------|-------------|---|---|--------------|
| Q0VGB7 | Ppp4r2   | Serine/threonine-protein phosphatase 4 regulatory subunit 2             | 329.21  | 20.62 | 46479  | 6  | 0.00069505 | 1.65967756 | 0.019219198 | 0 | 0 | 0.0072242223 |
| Q64152 | Btf3     | Transcription factor BTF3                                               | 627.07  | 41.67 | 22031  | 9  | 0.00070093 | 1.83701155 | 0.019219198 | 0 | 0 | 0.0072242223 |
| Q5DW34 | Ehmt1    | Histone-lysine N-methyltransferase EHMT1                                | 52.54   | 1.16  | 141999 | 1  | 0.00070432 | 4.41796394 | 0.019219198 | 0 | 0 | 0.0072242223 |
| O88746 | Tom1     | Target of Myb protein 1                                                 | 302.76  | 17.68 | 54325  | 6  | 0.00070974 | 2.0229722  | 0.019219198 | 0 | 0 | 0.0072242223 |
| P56477 | Irf5     | Interferon regulatory factor 5                                          | 205.02  | 14.08 | 56005  | 4  | 0.00071357 | 3.23915843 | 0.019219198 | 0 | 0 | 0.0072242223 |
| Q9D7A6 | Srp19    | Signal recognition particle 19 kDa protein                              | 132.76  | 18.06 | 16191  | 2  | 0.00079687 | 3.1305094  | 0.021262361 | 0 | 0 | 0.0079922182 |
| Q924C1 | Xpo5     | Exportin-5                                                              | 293.84  | 6.64  | 136973 | 6  | 0.00081399 | 4.16114196 | 0.021517869 | 0 | 0 | 0.00808826   |
| Q8BGQ7 | Aars     | Alanine--tRNA ligase, cytoplasmic                                       | 1526.94 | 40.19 | 106909 | 26 | 0.0008503  | 1.88856684 | 0.022271649 | 0 | 0 | 0.0083715955 |
| Q9CZ04 | Cops7a   | COP9 signalosome complex subunit 7a                                     | 282.99  | 19.64 | 30224  | 4  | 0.00087024 | 2.03046402 | 0.022411729 | 0 | 0 | 0.0084242492 |
| Q3THK7 | Gmps     | GMP synthase [glutamine-hydrolyzing]                                    | 1087.14 | 43.43 | 76723  | 20 | 0.00087572 | 2.16898576 | 0.022411729 | 0 | 0 | 0.0084242492 |
| Q80TY0 | Fnbp1    | Formin-binding protein 1                                                | 434.16  | 17.05 | 71344  | 8  | 0.0008792  | 2.74140269 | 0.022411729 | 0 | 0 | 0.0084242492 |
| Q9JLQ0 | Cd2ap    | CD2-associated protein                                                  | 193.96  | 7.22  | 70450  | 4  | 0.00091011 | 2.11364916 | 0.022994246 | 0 | 0 | 0.0086432093 |
| O35654 | Pold2    | DNA polymerase delta subunit 2                                          | 218.13  | 8.96  | 51355  | 3  | 0.00093902 | 2.20612421 | 0.02350936  | 0 | 0 | 0.0088368333 |
| Q9WU28 | Pfdn5    | Prefoldin subunit 5                                                     | 104.86  | 14.29 | 17356  | 2  | 0.00094696 | 1.7826222  | 0.02350936  | 0 | 0 | 0.0088368333 |
| Q60854 | Serpinb6 | Serpin B6                                                               | 986.41  | 53.17 | 42599  | 15 | 0.00097269 | 1.94466546 | 0.023703796 | 0 | 0 | 0.0089099188 |
| P28352 | Apex1    | DNA-(apurinic or apyrimidinic site) lyase                               | 455.02  | 35.33 | 35490  | 7  | 0.00100195 | 1.55098555 | 0.023703796 | 0 | 0 | 0.0089099188 |
| Q8K1B8 | Fermt3   | Fermitin family homolog 3                                               | 1259.78 | 48.27 | 75635  | 23 | 0.00100907 | 1.58073608 | 0.023703796 | 0 | 0 | 0.0089099188 |
| P97371 | Psmc1    | Proteasome activator complex subunit 1                                  | 295.29  | 24.9  | 28673  | 5  | 0.00101359 | 3.28665246 | 0.023703796 | 0 | 0 | 0.0089099188 |
| Q8VLJ5 | Oga      | Protein O-GlcNAcase                                                     | 77.43   | 2.18  | 102918 | 2  | 0.00101938 | 2.81887564 | 0.023703796 | 0 | 0 | 0.0089099188 |
| P17918 | Pcna     | Proliferating cell nuclear antigen                                      | 1734.93 | 66.67 | 28785  | 22 | 0.00102015 | 1.61776563 | 0.023703796 | 0 | 0 | 0.0089099188 |
| Q8VBW6 | Nae1     | NEDD8-activating enzyme E1 regulatory subunit                           | 117.42  | 4.68  | 60274  | 2  | 0.00102076 | 3.68066202 | 0.023703796 | 0 | 0 | 0.0089099188 |
| Q6PAR5 | Gapvd1   | GTPase-activating protein and VPS9 domain-containing protein 1          | 154.87  | 3.02  | 162402 | 3  | 0.00102121 | 3.30095853 | 0.023703796 | 0 | 0 | 0.0089099188 |
| P26516 | Psmc7    | 26S proteasome non-ATPase regulatory subunit 7                          | 496.05  | 27.1  | 36540  | 8  | 0.0010331  | 1.81625517 | 0.023786279 | 0 | 0 | 0.0089409232 |
| Q8BH69 | Seph1    | Selenide, water dikinase 1                                              | 178.57  | 14.03 | 42907  | 4  | 0.00105008 | 2.78164633 | 0.023803007 | 0 | 0 | 0.008947211  |
| P60229 | Eif3e    | Eukaryotic translation initiation factor 3 subunit E                    | 372.73  | 20.9  | 52221  | 8  | 0.00105346 | 1.91626213 | 0.023803007 | 0 | 0 | 0.008947211  |
| Q9CPU0 | Glo1     | Lactoylglutathione lyase                                                | 326.04  | 51.63 | 20810  | 7  | 0.00106654 | 3.18301956 | 0.023803007 | 0 | 0 | 0.008947211  |
| Q5SW19 | Cluh     | Clustered mitochondria protein homolog                                  | 186.59  | 3.88  | 148068 | 4  | 0.00106718 | 4.03640327 | 0.023803007 | 0 | 0 | 0.008947211  |
| Q9JLV6 | Pnkp     | Bifunctional polynucleotide phosphatase/kinase                          | 384.78  | 21.65 | 57223  | 6  | 0.001088   | 2.18189934 | 0.02384195  | 0 | 0 | 0.0089618492 |
| P83953 | Kpna1    | Importin subunit alpha-5                                                | 184.16  | 7.99  | 60137  | 3  | 0.00109101 | 2.65644094 | 0.02384195  | 0 | 0 | 0.0089618492 |
| P54823 | Ddx6     | Probable ATP-dependent RNA helicase DDX6                                | 665.64  | 33.54 | 54192  | 11 | 0.00109397 | 1.81798438 | 0.02384195  | 0 | 0 | 0.0089618492 |
| Q91YT0 | Ndufv1   | NADH dehydrogenase [ubiquinone] flavoprotein 1, mitochondrial           | 609.27  | 31.47 | 50834  | 9  | 0.00110638 | 0.60066373 | 0.023929688 | 0 | 0 | 0.0089948284 |
| P63328 | Ppp3ca   | Serine/threonine-protein phosphatase 2B catalytic subunit alpha isoform | 374.49  | 16.51 | 58644  | 7  | 0.00113029 | 1.94839832 | 0.024064808 | 0 | 0 | 0.009045618  |
| Q5SUR0 | Pfas     | Phosphoribosylformylglycinamide synthase                                | 1007.33 | 19.67 | 144629 | 19 | 0.0011337  | 1.87691942 | 0.024064808 | 0 | 0 | 0.009045618  |
| Q4V8K5 | Brox     | BRO1 domain-containing protein BROX                                     | 163.76  | 9.25  | 46192  | 3  | 0.00115663 | 4.43698052 | 0.024064808 | 0 | 0 | 0.009045618  |
| Q04899 | Cdk18    | Cyclin-dependent kinase 18                                              | 160.51  | 8.87  | 51848  | 3  | 0.00117006 | 2.7094041  | 0.024064808 | 0 | 0 | 0.009045618  |
| Q8BK64 | Ahsa1    | Activator of 90 kDa heat shock protein ATPase homolog 1                 | 230.53  | 21.6  | 38117  | 6  | 0.0011837  | 2.14010469 | 0.024064808 | 0 | 0 | 0.009045618  |
| Q3TW96 | Uap111   | UDP-N-acetylhexosamine pyrophosphorylase-like protein 1                 | 706.45  | 30.37 | 56614  | 12 | 0.00118807 | 2.26128441 | 0.024064808 | 0 | 0 | 0.009045618  |
| Q91VW3 | Sh3bgrl3 | SH3 domain-binding glutamic acid-rich-like protein 3                    | 216.58  | 31.18 | 10477  | 4  | 0.00119583 | 2.03185548 | 0.024064808 | 0 | 0 | 0.009045618  |
| Q8BMJ2 | Lars     | Leucine--tRNA ligase, cytoplasmic                                       | 1136.64 | 23.6  | 134192 | 22 | 0.00119685 | 2.12189156 | 0.024064808 | 0 | 0 | 0.009045618  |
| P68101 | Eif2s1   | Eukaryotic translation initiation factor 2 subunit 1                    | 875.77  | 56.19 | 36108  | 15 | 0.00120487 | 1.76006107 | 0.024064808 | 0 | 0 | 0.009045618  |
| P50399 | Gdi2     | Rab GDP dissociation inhibitor beta                                     | 1995.58 | 69.89 | 50537  | 34 | 0.00120705 | 2.03459303 | 0.024064808 | 0 | 0 | 0.009045618  |
| P35979 | Rp112    | 60S ribosomal protein L12                                               | 472.11  | 49.7  | 17805  | 6  | 0.00121557 | 1.52298826 | 0.024064808 | 0 | 0 | 0.009045618  |
| Q04207 | Rela     | Transcription factor p65                                                | 44.41   | 2.55  | 60212  | 1  | 0.00121559 | 1.76215981 | 0.024064808 | 0 | 0 | 0.009045618  |
| Q9D967 | Mdp1     | Magnesium-dependent phosphatase 1                                       | 67.25   | 14.02 | 18582  | 1  | 0.00122221 | 8.21920345 | 0.024064808 | 0 | 0 | 0.009045618  |
| Q93092 | Taldo1   | Transaldolase                                                           | 1283.64 | 52.82 | 37387  | 25 | 0.0012433  | 1.77997271 | 0.024307753 | 0 | 0 | 0.0091369378 |
| Q7TPR4 | Actn1    | Alpha-actinin-1                                                         | 1152.69 | 26.46 | 103068 | 20 | 0.00125157 | 1.92855298 | 0.024307753 | 0 | 0 | 0.0091369378 |
| Q8CFV9 | Rfk      | Riboflavin kinase                                                       | 59.68   | 13.55 | 17437  | 1  | 0.00127649 | 7.79203793 | 0.024393415 | 0 | 0 | 0.0091691367 |
| Q9CWM4 | Pfdn1    | Prefoldin subunit 1                                                     | 102.01  | 15.57 | 14255  | 2  | 0.00127838 | 2.24527986 | 0.024393415 | 0 | 0 | 0.0091691367 |
| P28658 | Atxn10   | Ataxin-10                                                               | 477.58  | 22.11 | 53707  | 8  | 0.00128162 | 2.54799791 | 0.024393415 | 0 | 0 | 0.0091691367 |
| Q3TXS7 | Psmc1    | 26S proteasome non-ATPase regulatory subunit 1                          | 1354.49 | 33.05 | 105730 | 23 | 0.00130772 | 1.58512923 | 0.024454082 | 0 | 0 | 0.0091919408 |

|        |          |                                                                          |         |       |        |    |            |            |             |   |   |              |
|--------|----------|--------------------------------------------------------------------------|---------|-------|--------|----|------------|------------|-------------|---|---|--------------|
| P41542 | Uso1     | General vesicular transport factor p115                                  | 208.86  | 6.26  | 107162 | 5  | 0.00131092 | 3.61815312 | 0.024454082 | 0 | 0 | 0.0091919408 |
| Q99PP7 | Trim33   | E3 ubiquitin-protein ligase TRIM33                                       | 108.42  | 2.1   | 123843 | 2  | 0.00131527 | 3.07136167 | 0.024454082 | 0 | 0 | 0.0091919408 |
| Q9WUP7 | Uchl5    | Ubiquitin carboxyl-terminal hydrolase isozyme L5                         | 663.04  | 37.99 | 37617  | 14 | 0.00131906 | 2.24252157 | 0.024454082 | 0 | 0 | 0.0091919408 |
| Q5X132 | Capzb    | F-actin-capping protein subunit beta                                     | 1198.29 | 56.62 | 30629  | 19 | 0.00133562 | 1.59108973 | 0.024601216 | 0 | 0 | 0.0092472464 |
| Q8K124 | Plekho2  | Pleckstrin homology domain-containing family O member 2                  | 133.36  | 9.29  | 53872  | 3  | 0.00136054 | 2.06956153 | 0.024815742 | 0 | 0 | 0.0093278835 |
| O70200 | Aif1     | Allograft inflammatory factor 1                                          | 147.18  | 11.56 | 16911  | 1  | 0.00136723 | 5.26429513 | 0.024815742 | 0 | 0 | 0.0093278835 |
| Q8CG72 | Adprh2   | Poly(ADP-ribose) glycohydrolase ARH3                                     | 121.31  | 10.54 | 39414  | 3  | 0.00137334 | 5.31537831 | 0.024815742 | 0 | 0 | 0.0093278835 |
| Q91W50 | Csde1    | Cold shock domain-containing protein E1                                  | 1036.8  | 29.82 | 88791  | 18 | 0.0014012  | 1.50265867 | 0.025159901 | 0 | 0 | 0.0094572481 |
| P25444 | Rps2     | 40S ribosomal protein S2                                                 | 884.65  | 40.27 | 31231  | 15 | 0.00141432 | 1.46942155 | 0.02523679  | 0 | 0 | 0.0094861495 |
| Q01730 | Rsu1     | Ras suppressor protein 1                                                 | 148.7   | 24.19 | 31550  | 3  | 0.00143004 | 2.77437088 | 0.025358869 | 0 | 0 | 0.0095320373 |
| Q8JZY2 | Comm10   | COMM domain-containing protein 10                                        | 42.59   | 5.94  | 22812  | 1  | 0.00145113 | 7.21872514 | 0.025573949 | 0 | 0 | 0.0096128826 |
| Q99JX4 | Eif3m    | Eukaryotic translation initiation factor 3 subunit M                     | 513.85  | 28.61 | 42517  | 7  | 0.00150356 | 2.15231009 | 0.026325788 | 0 | 0 | 0.0098954882 |
| O88685 | Psme3    | 26S proteasome regulatory subunit 6A                                     | 957.78  | 43.89 | 49549  | 17 | 0.00152084 | 1.52752929 | 0.026325788 | 0 | 0 | 0.0098954882 |
| Q9JHU4 | Dync1h1  | Cytoplasmic dynein 1 heavy chain 1                                       | 4449.2  | 23.32 | 532045 | 86 | 0.00152956 | 1.71181735 | 0.026325788 | 0 | 0 | 0.0098954882 |
| Q3TC93 | Hs1bp3   | HCLS1-binding protein 3                                                  | 64.99   | 7.09  | 43691  | 2  | 0.00153068 | 3.65552526 | 0.026325788 | 0 | 0 | 0.0098954882 |
| O08663 | Metap2   | Methionine aminopeptidase 2                                              | 107.39  | 5.44  | 52922  | 2  | 0.00155724 | 11.611251  | 0.026387522 | 0 | 0 | 0.0099186933 |
| Q9JJU8 | Sh3bgr1  | SH3 domain-binding glutamic acid-rich-like protein                       | 362.73  | 70.18 | 12811  | 6  | 0.00158112 | 1.88170617 | 0.026387522 | 0 | 0 | 0.0099186933 |
| O88377 | Pip4k2b  | Phosphatidylinositol 5-phosphate 4-kinase type-2 beta                    | 62.76   | 3.37  | 47264  | 1  | 0.00159718 | 163976.969 | 0.026387522 | 0 | 0 | 0.0099186933 |
| Q62465 | Vat1     | Synaptic vesicle membrane protein VAT-1 homolog                          | 696.42  | 37.19 | 43097  | 12 | 0.00160321 | 1.94428401 | 0.026387522 | 0 | 0 | 0.0099186933 |
| Q61584 | Fxr1     | Fragile X mental retardation syndrome-related protein 1                  | 818.29  | 27.33 | 76222  | 14 | 0.00160419 | 1.35856376 | 0.026387522 | 0 | 0 | 0.0099186933 |
| Q9QXB9 | Drp2     | Developmentally-regulated GTP-binding protein 2                          | 211.09  | 12.09 | 40718  | 4  | 0.00160585 | 2.21668872 | 0.026387522 | 0 | 0 | 0.0099186933 |
| P57780 | Actn4    | Alpha-actinin-4                                                          | 1551.8  | 35.31 | 104977 | 25 | 0.00160951 | 1.8922955  | 0.026387522 | 0 | 0 | 0.0099186933 |
| Q9WUM4 | Coro1c   | Coronin-1C                                                               | 861.13  | 36.08 | 53121  | 13 | 0.00161111 | 1.47205383 | 0.026387522 | 0 | 0 | 0.0099186933 |
| P42932 | Cct8     | T-complex protein 1 subunit theta                                        | 1788.49 | 55.11 | 59555  | 33 | 0.0016259  | 1.91387328 | 0.026387522 | 0 | 0 | 0.0099186933 |
| P62774 | Mtpn     | Myotrophin                                                               | 239.8   | 35.59 | 12861  | 3  | 0.00163008 | 2.80908485 | 0.026387522 | 0 | 0 | 0.0099186933 |
| Q58A65 | Spag9    | C-Jun-amino-terminal kinase-interacting protein 4                        | 117.93  | 2.8   | 146219 | 3  | 0.00164322 | 2.63528555 | 0.026387522 | 0 | 0 | 0.0099186933 |
| P43274 | Hist1h1e | Histone H1.4                                                             | 777.19  | 34.25 | 21977  | 12 | 0.00167902 | 0.49320356 | 0.026387522 | 0 | 0 | 0.0099186933 |
| Q9CX56 | Psmd8    | 26S proteasome non-ATPase regulatory subunit 8                           | 187.68  | 7.08  | 39930  | 3  | 0.00167934 | 1.61512242 | 0.026387522 | 0 | 0 | 0.0099186933 |
| Q5X172 | Eif4h    | Eukaryotic translation initiation factor 4H                              | 300.69  | 21.37 | 27324  | 5  | 0.00168428 | 1.6467154  | 0.026387522 | 0 | 0 | 0.0099186933 |
| Q3TRM8 | Hk3      | Hexokinase-3                                                             | 1098.27 | 25.49 | 100101 | 17 | 0.00168661 | 2.0000524  | 0.026387522 | 0 | 0 | 0.0099186933 |
| P17220 | Psma2    | Proteasome subunit alpha type-2                                          | 707.3   | 41.45 | 25927  | 10 | 0.00168672 | 1.75570297 | 0.026387522 | 0 | 0 | 0.0099186933 |
| Q9JHU0 | Tmod3    | Tropomodulin-3                                                           | 319.1   | 29.26 | 39503  | 7  | 0.00169139 | 2.13759023 | 0.026387522 | 0 | 0 | 0.0099186933 |
| Q99LC8 | Eif2b1   | Translation initiation factor eIF-2B subunit alpha                       | 98.49   | 5.57  | 33816  | 1  | 0.00172047 | 4.46872015 | 0.026695362 | 0 | 0 | 0.010034406  |
| A2ADY9 | Ddi2     | Protein DDI1 homolog 2                                                   | 353.19  | 24.56 | 44591  | 6  | 0.00174024 | 2.78346621 | 0.026856112 | 0 | 0 | 0.010094829  |
| P47856 | Gfpt1    | Glutamine--fructose-6-phosphate aminotransferase [isomerizing] 1         | 162.85  | 5.02  | 78539  | 3  | 0.00178357 | 3.8759221  | 0.027376879 | 0 | 0 | 0.010290579  |
| Q91WU5 | As3mt    | Arsenite methyltransferase                                               | 146.66  | 13.3  | 41794  | 3  | 0.0018034  | 2.93221593 | 0.027533207 | 0 | 0 | 0.01034934   |
| P60122 | Ruvb1    | RuvB-like 1                                                              | 962.43  | 46.05 | 50214  | 17 | 0.00182582 | 1.2779234  | 0.027619449 | 0 | 0 | 0.010381757  |
| Q62446 | Fkbp3    | Peptidyl-prolyl cis-trans isomerase FKBP3                                | 120.44  | 15.62 | 25148  | 3  | 0.0018284  | 2.31843332 | 0.027619449 | 0 | 0 | 0.010381757  |
| P39749 | Fen1     | Flap endonuclease 1                                                      | 554.75  | 21.43 | 42315  | 9  | 0.00186412 | 1.79222631 | 0.028010808 | 0 | 0 | 0.010528863  |
| P81799 | Nagk     | N-acetyl-D-glucosamine kinase                                            | 56.74   | 2.92  | 37196  | 1  | 0.00190332 | 3.90399187 | 0.028181763 | 0 | 0 | 0.010593123  |
| Q11011 | Npepps   | Puromycin-sensitive aminopeptidase                                       | 553.2   | 11.3  | 103325 | 10 | 0.00191186 | 2.11147298 | 0.028181763 | 0 | 0 | 0.010593123  |
| P80314 | Cct2     | T-complex protein 1 subunit beta                                         | 2029.75 | 64.3  | 57477  | 32 | 0.00191255 | 1.7381214  | 0.028181763 | 0 | 0 | 0.010593123  |
| P14131 | Rps16    | 40S ribosomal protein S16                                                | 682.93  | 71.92 | 16445  | 14 | 0.00192758 | 1.37633362 | 0.028181763 | 0 | 0 | 0.010593123  |
| Q8BU30 | Iars     | Isoleucine--tRNA ligase, cytoplasmic                                     | 391.51  | 7.21  | 144271 | 8  | 0.00194861 | 2.6659746  | 0.028181763 | 0 | 0 | 0.010593123  |
| Q9Z2A0 | Pdpk1    | 3-phosphoinositide-dependent protein kinase 1                            | 43.49   | 3.04  | 63759  | 1  | 0.00195373 | 7.05318585 | 0.028181763 | 0 | 0 | 0.010593123  |
| P21670 | Psma4    | Proteasome subunit alpha type-4                                          | 704.89  | 65.13 | 29498  | 14 | 0.00195821 | 1.77355237 | 0.028181763 | 0 | 0 | 0.010593123  |
| P21300 | Akr1b7   | Aldose reductase-related protein 1                                       | 337.12  | 13.92 | 35988  | 7  | 0.00198853 | 1.41934951 | 0.028181763 | 0 | 0 | 0.010593123  |
| Q8BV13 | Cops7b   | COP9 signalosome complex subunit 7b                                      | 38.11   | 7.2   | 29689  | 1  | 0.00199049 | 5.24463826 | 0.028181763 | 0 | 0 | 0.010593123  |
| Q9DBG6 | Rpn2     | Dolichyl-diphosphooligosaccharide--protein glycosyltransferase subunit 2 | 875.04  | 29.32 | 69063  | 13 | 0.00200038 | 0.57910741 | 0.028181763 | 0 | 0 | 0.010593123  |
| Q62384 | Zpr1     | Zinc finger protein ZPR1                                                 | 148.03  | 7.63  | 50715  | 3  | 0.00200199 | 1.94646891 | 0.028181763 | 0 | 0 | 0.010593123  |



|        |           |                                                                          |          |       |        |     |            |            |             |   |   |             |
|--------|-----------|--------------------------------------------------------------------------|----------|-------|--------|-----|------------|------------|-------------|---|---|-------------|
| O09061 | Psmb1     | Proteasome subunit beta type-1                                           | 902.13   | 54.17 | 26372  | 13  | 0.0020155  | 1.40486066 | 0.028181763 | 0 | 0 | 0.010593123 |
| Q8CIG8 | Prmt5     | Protein arginine N-methyltransferase 5                                   | 73.3     | 2.04  | 72680  | 1   | 0.00202627 | 5.09344465 | 0.028181763 | 0 | 0 | 0.010593123 |
| P61924 | Copz1     | Coatomer subunit zeta-1                                                  | 104.24   | 22.03 | 20198  | 3   | 0.00203767 | 3.21401831 | 0.028181763 | 0 | 0 | 0.010593123 |
| Q6AYH5 | Dctn2     | Dynactin subunit 2                                                       | 166.19   | 8.21  | 44148  | 3   | 0.00203875 | 4.57825432 | 0.028181763 | 0 | 0 | 0.010593123 |
| Q3U0V1 | Khsrp     | Far upstream element-binding protein 2                                   | 1259.83  | 42.91 | 76775  | 20  | 0.00205625 | 1.39133572 | 0.028181763 | 0 | 0 | 0.010593123 |
| Q9CQE8 | RTRAF     | RNA transcription, translation and transport factor protein              | 48.88    | 12.3  | 28152  | 1   | 0.0020581  | 4.59837067 | 0.028181763 | 0 | 0 | 0.010593123 |
| Q9JM14 | Nt5c      | 5'(3)-deoxyribonucleotidase, cytosolic type                              | 235.2    | 20    | 23076  | 4   | 0.00205913 | 1.79388089 | 0.028181763 | 0 | 0 | 0.010593123 |
| Q9JJ28 | Flii      | Protein flightless-1 homolog                                             | 579.02   | 10.46 | 144803 | 11  | 0.00206304 | 1.4679406  | 0.028181763 | 0 | 0 | 0.010593123 |
| P29351 | Ptpn6     | Tyrosine-protein phosphatase non-receptor type 6                         | 1722.83  | 54.62 | 67559  | 30  | 0.00209218 | 1.30331399 | 0.028379283 | 0 | 0 | 0.010667368 |
| P62994 | Grb2      | Growth factor receptor-bound protein 2                                   | 92.77    | 11.06 | 25206  | 2   | 0.00209738 | 3.29032498 | 0.028379283 | 0 | 0 | 0.010667368 |
| Q9WVA4 | Tagln2    | Transgelin-2                                                             | 1756.11  | 79.4  | 22395  | 24  | 0.00210889 | 1.67197219 | 0.028400411 | 0 | 0 | 0.01067531  |
| Q9D819 | Ppa1      | Inorganic pyrophosphatase                                                | 241.96   | 17.3  | 32667  | 5   | 0.00221977 | 2.73310373 | 0.029723901 | 0 | 0 | 0.011172791 |
| Q9CWQ0 | Dph5      | Diphthine methyl ester synthase                                          | 74.21    | 8.19  | 31218  | 1   | 0.00224398 | 2.81824319 | 0.029723901 | 0 | 0 | 0.011172791 |
| Q9D211 | Cdkn2aip1 | CDKN2AIP N-terminal-like protein                                         | 78.86    | 18.97 | 13209  | 2   | 0.00224408 | 3.47603424 | 0.029723901 | 0 | 0 | 0.011172791 |
| A0MZ67 | Shtn1     | Shootin-1                                                                | 202.58   | 8.06  | 71446  | 4   | 0.00224881 | 2.37673604 | 0.029723901 | 0 | 0 | 0.011172791 |
| P62320 | Snrpd3    | Small nuclear ribonucleoprotein Sm D3                                    | 385.4    | 54.76 | 13916  | 7   | 0.00228654 | 0.72532518 | 0.029964463 | 0 | 0 | 0.011263214 |
| Q8VDD5 | Myh9      | Myosin-9                                                                 | 7869.631 | 52.91 | 226372 | 116 | 0.00229116 | 1.50193745 | 0.029964463 | 0 | 0 | 0.011263214 |
| P97814 | Pstpip1   | Proline-serine-threonine phosphatase-interacting protein 1               | 136.51   | 8.92  | 47590  | 2   | 0.00230981 | 2.84721269 | 0.029964463 | 0 | 0 | 0.011263214 |
| Q8BYW1 | Arhgap25  | Rho GTPase-activating protein 25                                         | 332.92   | 13.12 | 73383  | 6   | 0.00232506 | 2.40225259 | 0.029964463 | 0 | 0 | 0.011263214 |
| Q80WS3 | Fbl1l     | rRNA/tRNA 2'-O-methyltransferase fibrillar-like protein 1                | 157.08   | 11.46 | 33339  | 3   | 0.0023452  | 0.50750332 | 0.029964463 | 0 | 0 | 0.011263214 |
| P61290 | Psme3     | Proteasome activator complex subunit 3                                   | 520.16   | 29.13 | 29506  | 9   | 0.00235171 | 2.48131469 | 0.029964463 | 0 | 0 | 0.011263214 |
| Q922D8 | Mthfd1    | C-1-tetrahydrofolate synthase, cytoplasmic                               | 1267.38  | 30.05 | 101200 | 25  | 0.00235756 | 1.84931023 | 0.029964463 | 0 | 0 | 0.011263214 |
| Q99KK7 | Dpp3      | Dipeptidyl peptidase 3                                                   | 655.5    | 29.67 | 82898  | 12  | 0.00236496 | 2.1470463  | 0.029964463 | 0 | 0 | 0.011263214 |
| Q924T2 | Mrps2     | 28S ribosomal protein S2, mitochondrial                                  | 262.11   | 27.49 | 32313  | 5   | 0.00236873 | 1.7332089  | 0.029964463 | 0 | 0 | 0.011263214 |
| Q91YQ5 | Rpn1      | Dolichyl-diphosphooligosaccharide--protein glycosyltransferase subunit 1 | 1542.48  | 52.96 | 68528  | 26  | 0.00237197 | 0.69387136 | 0.029964463 | 0 | 0 | 0.011263214 |
| O35263 | Pafah1b3  | Platelet-activating factor acetylhydrolase IB subunit gamma              | 65.54    | 3.88  | 25863  | 1   | 0.00242068 | 1.88590612 | 0.030076256 | 0 | 0 | 0.011305236 |
| Q8R0H9 | Gga1      | ADP-ribosylation factor-binding protein GGA1                             | 176.33   | 7.56  | 69972  | 4   | 0.00245565 | 2.51737435 | 0.030076256 | 0 | 0 | 0.011305236 |
| Q6P8X1 | Snx6      | Sorting nexin-6                                                          | 187.77   | 15.02 | 46649  | 4   | 0.00245634 | 2.5573875  | 0.030076256 | 0 | 0 | 0.011305236 |
| Q9CQ75 | Ndufa2    | NADH dehydrogenase [ubiquinone] 1 alpha subcomplex subunit 2             | 75.5     | 14.14 | 10916  | 1   | 0.00246301 | 0.77002219 | 0.030076256 | 0 | 0 | 0.011305236 |
| P97360 | Etv6      | Transcription factor ETV6                                                | 50.2     | 1.44  | 56406  | 1   | 0.00246349 | 2.54978135 | 0.030076256 | 0 | 0 | 0.011305236 |
| P62075 | Timm13    | Mitochondrial import inner membrane translocase subunit Tim13            | 105.98   | 14.74 | 10458  | 1   | 0.00249036 | 5.31997606 | 0.030076256 | 0 | 0 | 0.011305236 |
| P04184 | Tk1       | Thymidine kinase, cytosolic                                              | 205.88   | 28.33 | 25776  | 5   | 0.00249319 | 1.65901809 | 0.030076256 | 0 | 0 | 0.011305236 |
| P0C0A1 | Vps25     | Vacuolar protein-sorting-associated protein 25                           | 121.19   | 21.02 | 20762  | 3   | 0.00249991 | 2.18546916 | 0.030076256 | 0 | 0 | 0.011305236 |
| Q91V17 | Rnh1      | Ribonuclease inhibitor                                                   | 2016.51  | 74.78 | 49816  | 24  | 0.00251054 | 2.13558322 | 0.030076256 | 0 | 0 | 0.011305236 |
| Q9JM76 | Arpc3     | Actin-related protein 2/3 complex subunit 3                              | 372.7    | 44.38 | 20525  | 7   | 0.00251276 | 1.65860434 | 0.030076256 | 0 | 0 | 0.011305236 |
| P62329 | Tmsb4x    | Thymosin beta-4                                                          | 241.93   | 68.18 | 5053   | 4   | 0.00251354 | 1.85855477 | 0.030076256 | 0 | 0 | 0.011305236 |
| Q5U2Q7 | Etf1      | Eukaryotic peptide chain release factor subunit 1                        | 304.23   | 22.43 | 49031  | 6   | 0.00251615 | 1.68008915 | 0.030076256 | 0 | 0 | 0.011305236 |
| Q7TSC1 | Prc2a     | Protein PRC2A                                                            | 65.12    | 0.97  | 229203 | 1   | 0.00251777 | 7.41641866 | 0.030076256 | 0 | 0 | 0.011305236 |
| Q9QZQ8 | H2afy     | Core histone macro-H2A.1                                                 | 453.21   | 32.53 | 39735  | 7   | 0.00253259 | 0.44854376 | 0.030127236 | 0 | 0 | 0.011324398 |
| P97311 | Mcm6      | DNA replication licensing factor MCM6                                    | 1179.58  | 31.06 | 92867  | 20  | 0.00255667 | 1.33469709 | 0.030287514 | 0 | 0 | 0.011384645 |
| Q9ES52 | Inpp5d    | Phosphatidylinositol 3,4,5-trisphosphate 5-phosphatase 1                 | 1091.19  | 24.43 | 133542 | 23  | 0.00259162 | 1.6717643  | 0.030574692 | 0 | 0 | 0.011492591 |
| O35309 | Nmi       | N-myc-interactor                                                         | 116.7    | 9.55  | 35236  | 2   | 0.00264707 | 2.08329381 | 0.030980663 | 0 | 0 | 0.011645189 |
| P32921 | Wars      | Tryptophan--tRNA ligase, cytoplasmic                                     | 568.58   | 30.77 | 54358  | 10  | 0.00264773 | 2.35103623 | 0.030980663 | 0 | 0 | 0.011645189 |
| Q6P9P6 | Kif11     | Kinesin-like protein KIF11                                               | 112.39   | 3.99  | 118027 | 3   | 0.00268442 | 2.54029491 | 0.031230642 | 0 | 0 | 0.011739153 |
| P47754 | Capza2    | F-actin-capping protein subunit alpha-2                                  | 401.02   | 24.83 | 32967  | 7   | 0.00269612 | 1.66900955 | 0.031230642 | 0 | 0 | 0.011739153 |
| Q5FWK3 | Arhgap1   | Rho GTPase-activating protein 1                                          | 140.86   | 7.06  | 50411  | 2   | 0.00270337 | 16.4619828 | 0.031230642 | 0 | 0 | 0.011739153 |
| Q9DAK9 | Phpt1     | 14 kDa phosphohistidine phosphatase                                      | 42.81    | 19.35 | 13997  | 1   | 0.00271285 | 4.81630133 | 0.031230642 | 0 | 0 | 0.011739153 |
| P37996 | Arl3      | ADP-ribosylation factor-like protein 3                                   | 191.8    | 25.82 | 20457  | 4   | 0.00277201 | 2.81685125 | 0.031346933 | 0 | 0 | 0.011782865 |
| Q9EQK5 | Mvp       | Major vault protein                                                      | 1635.94  | 43.32 | 95924  | 27  | 0.00277484 | 1.38014116 | 0.031346933 | 0 | 0 | 0.011782865 |

|        |          |                                                                       |         |       |        |    |            |            |             |                |   |             |
|--------|----------|-----------------------------------------------------------------------|---------|-------|--------|----|------------|------------|-------------|----------------|---|-------------|
| P97834 | Gps1     | COP9 signalosome complex subunit 1                                    | 267.39  | 15.07 | 53428  | 6  | 0.00278338 | 1.88325713 | 0.031346933 | 0              | 0 | 0.011782865 |
| Q9R1T2 | Sae1     | SUMO-activating enzyme subunit 1                                      | 772     | 46.57 | 38620  | 14 | 0.00278932 | 2.174579   | 0.031346933 | 0              | 0 | 0.011782865 |
| P16110 | Lgals3   | Galectin-3                                                            | 686.86  | 35.23 | 27515  | 12 | 0.00279538 | 1.76323258 | 0.031346933 | 0              | 0 | 0.011782865 |
| Q8BP47 | Nars     | Asparagine--tRNA ligase, cytoplasmic                                  | 784.23  | 27.55 | 64279  | 15 | 0.00279874 | 1.67116886 | 0.031346933 | 0              | 0 | 0.011782865 |
| Q5M7W1 | Txnip    | Thioredoxin-interacting protein                                       | 38.62   | 3.05  | 44018  | 1  | 0.00279981 | 6.47103293 | 0.031346933 | 0              | 0 | 0.011782865 |
| Q9DBQ7 | Scyl3    | Protein-associating with the carboxyl-terminal domain of ezrin        | 38.24   | 1.5   | 81333  | 1  | 0.00282006 | 6.88743607 | 0.031450296 | 0              | 0 | 0.011821718 |
| Q80TM9 | Nisch    | Nischarin                                                             | 244.24  | 3.45  | 175012 | 4  | 0.00286403 | 2.46679126 | 0.03155532  | 0              | 0 | 0.011861195 |
| Q68FL4 | Ahcy12   | Putative adenosylhomocysteinase 3                                     | 238.46  | 7.01  | 66899  | 5  | 0.00287117 | 3.34846301 | 0.03155532  | 0              | 0 | 0.011861195 |
| P31750 | Akt1     | RAC-alpha serine/threonine-protein kinase                             | 48.16   | 1.67  | 55707  | 1  | 0.0028756  | 2.63246496 | 0.03155532  | 0              | 0 | 0.011861195 |
| P46664 | Adss     | Adenylosuccinate synthetase isozyme 2                                 | 769.26  | 35.31 | 50021  | 13 | 0.00287878 | 1.97666263 | 0.03155532  | 0              | 0 | 0.011861195 |
| Q8K1R7 | Nek9     | Serine/threonine-protein kinase Nek9                                  | 179.81  | 5.39  | 107143 | 4  | 0.00289355 | 2.2724479  | 0.03155532  | 4.9406565e-324 | 0 | 0.011861195 |
| P50516 | Atp6v1a  | V-type proton ATPase catalytic subunit A                              | 1703.4  | 49.43 | 68326  | 26 | 0.00294102 | 1.49709679 | 0.03155532  | 1.9762626e-323 | 0 | 0.011861195 |
| Q8R5H1 | Usp15    | Ubiquitin carboxyl-terminal hydrolase 15                              | 176.33  | 5.71  | 112325 | 4  | 0.00294575 | 2.72789218 | 0.03155532  | 8.8931816e-323 | 0 | 0.011861195 |
| O88545 | Cops6    | COP9 signalosome complex subunit 6                                    | 168.65  | 8.33  | 35880  | 4  | 0.00295817 | 2.46247323 | 0.03155532  | 4.1007449e-322 | 0 | 0.011861195 |
| Q03265 | Atp5f1a  | ATP synthase subunit alpha, mitochondrial                             | 2770.93 | 62.39 | 59753  | 40 | 0.00297033 | 6.07760753 | 0.03155532  | 1.8329835e-321 | 0 | 0.011861195 |
| Q60902 | Eps15l1  | Epidermal growth factor receptor substrate 15-like 1                  | 40.21   | 0.88  | 99309  | 1  | 0.00297321 | 6.90367382 | 0.03155532  | 8.211371e-321  | 0 | 0.011861195 |
| Q6BB18 | Ufc1     | Ubiquitin-fold modifier-conjugating enzyme 1                          | 102.15  | 28.14 | 19492  | 3  | 0.0029793  | 2.17569308 | 0.03155532  | 3.672884e-320  | 0 | 0.011861195 |
| O70145 | Ncf2     | Neutrophil cytosol factor 2                                           | 518.48  | 29.14 | 59485  | 11 | 0.00298777 | 1.94973907 | 0.03155532  | 1.6400015e-319 | 0 | 0.011861195 |
| E9PVA8 | Gcn1     | eIF-2-alpha kinase activator GCN1                                     | 214.6   | 2.47  | 293021 | 6  | 0.00300287 | 2.8777809  | 0.03155532  | 7.3128138e-319 | 0 | 0.011861195 |
| Q8R570 | Snap47   | Synaptosomal-associated protein 47                                    | 51.85   | 3.63  | 46524  | 1  | 0.0030067  | 7.31971922 | 0.03155532  | 3.2562533e-318 | 0 | 0.011861195 |
| Q62348 | Tsn      | Translin                                                              | 380.23  | 31.14 | 26201  | 7  | 0.00302405 | 2.02021335 | 0.03155532  | 1.4479206e-317 | 0 | 0.011861195 |
| Q6P1B1 | Xpnpep1  | Xaa-Pro aminopeptidase 1                                              | 556.77  | 26.32 | 69591  | 11 | 0.00303658 | 1.69168705 | 0.03155532  | 6.429298e-317  | 0 | 0.011861195 |
| P47860 | Pfkfb    | ATP-dependent 6-phosphofructokinase, platelet type                    | 723.76  | 13.58 | 85720  | 9  | 0.00304995 | 1.70476886 | 0.03155532  | 2.8508503e-316 | 0 | 0.011861195 |
| Q8VEE4 | Rpa1     | Replication protein A 70 kDa DNA-binding subunit                      | 669.48  | 23.76 | 69037  | 13 | 0.00305208 | 1.36794389 | 0.03155532  | 1.2623429e-315 | 0 | 0.011861195 |
| Q9CXY6 | Ilf2     | Interleukin enhancer-binding factor 2                                 | 529.81  | 37.18 | 43062  | 9  | 0.00305853 | 0.56664056 | 0.03155532  | 5.5817751e-315 | 0 | 0.011861195 |
| B0BNE2 | Polr2e   | DNA-directed RNA polymerases I, II, and III subunit RPABC1            | 117.41  | 11.43 | 24570  | 2  | 0.0030702  | 0.69076465 | 0.03155532  | 2.4646734e-314 | 0 | 0.011861195 |
| P46467 | Vps4b    | Vacuolar protein sorting-associated protein 4B                        | 376.17  | 22.07 | 49419  | 7  | 0.00307885 | 1.86326425 | 0.03155532  | 1.086772e-313  | 0 | 0.011861195 |
| A2AAY5 | Sh3pxd2b | SH3 and PX domain-containing protein 2B                               | 186.02  | 4.74  | 101517 | 5  | 0.00309029 | 1.99192903 | 0.03155532  | 4.7853041e-313 | 0 | 0.011861195 |
| Q9Z2Y8 | Plpbp    | Pyridoxal phosphate homeostasis protein                               | 82.71   | 4.74  | 30049  | 1  | 0.00310046 | 4.2883222  | 0.03155532  | 2.1041304e-312 | 0 | 0.011861195 |
| P50543 | S100a11  | Protein S100-A11                                                      | 219.21  | 40.82 | 11083  | 4  | 0.00310384 | 1.50126577 | 0.03155532  | 9.2390597e-312 | 0 | 0.011861195 |
| P50396 | Gdi1     | Rab GDP dissociation inhibitor alpha                                  | 467.39  | 18.79 | 50522  | 8  | 0.0031058  | 1.83836288 | 0.03155532  | 4.0511179e-311 | 0 | 0.011861195 |
| P83940 | Eloc     | Elongin-C                                                             | 257.95  | 37.5  | 12473  | 3  | 0.00311842 | 2.26777041 | 0.031571234 | 1.7738381e-310 | 0 | 0.011867177 |
| P57776 | Eef1d    | Elongation factor 1-delta                                             | 1088.8  | 56.94 | 31293  | 16 | 0.00313951 | 1.84010517 | 0.031672432 | 7.7561291e-310 | 0 | 0.011905216 |
| Q32PX2 | Aimp2    | Aminoacyl tRNA synthase complex-interacting multifunctional protein 2 | 201.97  | 16.88 | 35443  | 4  | 0.00315321 | 1.65525198 | 0.03169864  | 3.3866323e-309 | 0 | 0.011915067 |
| Q91VX2 | Ubap2    | Ubiquitin-associated protein 2                                        | 204.92  | 5.57  | 117966 | 4  | 0.0031892  | 3.29481862 | 0.031947962 | 1.4766684e-308 | 0 | 0.012008783 |
| Q8BG30 | Nelfa    | Negative elongation factor A                                          | 126.8   | 4.53  | 57585  | 2  | 0.00323023 | 1.94052967 | 0.032245806 | 6.4296874e-308 | 0 | 0.012120739 |
| Q91YE6 | Ipo9     | Importin-9                                                            | 336.01  | 8.84  | 116052 | 7  | 0.00327989 | 1.63690602 | 0.032602178 | 2.7956876e-307 | 0 | 0.012254694 |
| Q8VB70 | Tmx1     | Thioredoxin-related transmembrane protein 1                           | 171.11  | 12.59 | 31396  | 3  | 0.00329008 | 0.74068343 | 0.032602178 | 1.2138899e-306 | 0 | 0.012254694 |
| Q6ZQ08 | Cnot1    | CCR4-NOT transcription complex subunit 1                              | 124.51  | 1.22  | 266808 | 3  | 0.00330019 | 2.58478315 | 0.032602178 | 5.2633452e-306 | 0 | 0.012254694 |
| P33174 | Kif4     | Chromosome-associated kinesin KIF4                                    | 101.93  | 2.11  | 139519 | 2  | 0.00333178 | 2.67373207 | 0.032708806 | 2.2789577e-305 | 0 | 0.012294774 |
| P51855 | Gss      | Glutathione synthetase                                                | 236.54  | 14.14 | 52247  | 4  | 0.00333389 | 1.91726387 | 0.032708806 | 9.8537719e-305 | 0 | 0.012294774 |
| Q6NVF4 | Helb     | DNA helicase B                                                        | 41.27   | 0.74  | 121471 | 1  | 0.0033467  | 4.95719454 | 0.032722015 | 4.254618e-304  | 0 | 0.012299739 |
| P70195 | Psmb7    | Proteasome subunit beta type-7                                        | 158.8   | 25.27 | 29891  | 4  | 0.00336174 | 1.90780928 | 0.032756901 | 1.8344693e-303 | 0 | 0.012312852 |
| Q7M0E3 | Dstn     | Destrin                                                               | 579.56  | 56.36 | 18534  | 10 | 0.0033767  | 1.5984852  | 0.032790738 | 7.8986358e-303 | 0 | 0.012325571 |
| Q03963 | Eif2ak2  | Interferon-induced, double-stranded RNA-activated protein kinase      | 382.11  | 19.81 | 58280  | 6  | 0.00339122 | 1.88113268 | 0.032795996 | 3.3961394e-302 | 0 | 0.012327547 |
| P63028 | Tpt1     | Translationally-controlled tumor protein                              | 252.57  | 44.19 | 19462  | 4  | 0.00340094 | 3.82131594 | 0.032795996 | 1.4581784e-301 | 0 | 0.012327547 |
| A2A5R2 | Arfgef2  | Brefeldin A-inhibited guanine nucleotide-exchange protein 2           | 120.78  | 2.01  | 202240 | 3  | 0.00342204 | 1.72755445 | 0.032795996 | 6.2521233e-301 | 0 | 0.012327547 |
| P85972 | Vcl      | Vinculin                                                              | 822.95  | 16.79 | 116615 | 16 | 0.00343084 | 2.24702026 | 0.032795996 | 2.6769244e-300 | 0 | 0.012327547 |
| Q60865 | Caprin1  | Caprin-1                                                              | 810.19  | 24.89 | 78169  | 14 | 0.00343468 | 2.03706762 | 0.032795996 | 1.1445542e-299 | 0 | 0.012327547 |
| Q9WUA3 | Pfkfb    | ATP-dependent 6-phosphofructokinase, platelet type                    | 1615    | 44.9  | 85455  | 23 | 0.00344987 | 1.78819363 | 0.032831219 | 4.8868416e-299 | 0 | 0.012340787 |
| O55023 | Impa1    | Inositol monophosphatase 1                                            | 402.31  | 24.91 | 30436  | 8  | 0.00346333 | 1.7193419  | 0.032849817 | 2.0835877e-298 | 0 | 0.012347778 |

|        |         |                                                              |         |       |        |    |            |            |             |                |   |             |
|--------|---------|--------------------------------------------------------------|---------|-------|--------|----|------------|------------|-------------|----------------|---|-------------|
| P03995 | Gfap    | Glial fibrillary acidic protein                              | 164.37  | 6.05  | 49900  | 3  | 0.00348299 | 1.82536956 | 0.032894949 | 8.871293e-298  | 0 | 0.012364742 |
| Q61655 | Ddx19a  | ATP-dependent RNA helicase DDX19A                            | 562.17  | 30.54 | 53933  | 10 | 0.00349113 | 1.82853262 | 0.032894949 | 3.7718432e-297 | 0 | 0.012364742 |
| Q92112 | Klhdc4  | Kelch domain-containing protein 4                            | 38.72   | 2.57  | 64860  | 1  | 0.00354098 | 3.25676764 | 0.033254963 | 1.6014445e-296 | 0 | 0.012500066 |
| Q8CG48 | Smc2    | Structural maintenance of chromosomes protein 2              | 717.19  | 15.03 | 134239 | 14 | 0.0036029  | 2.15783547 | 0.033725494 | 6.7898737e-296 | 0 | 0.012676932 |
| Q9Z0H1 | Wdr46   | WD repeat-containing protein 46 2                            | 425.78  | 22.19 | 69048  | 9  | 0.00366888 | 0.67848101 | 0.034079635 | 2.8747692e-295 | 0 | 0.012810049 |
| Q9D1A2 | Cndp2   | Cytosolic non-specific dipeptidase                           | 693.95  | 35.37 | 52767  | 13 | 0.00368463 | 1.97943954 | 0.034079635 | 1.2154462e-294 | 0 | 0.012810049 |
| Q5U2Q3 |         | Ester hydrolase C11orf54 homolog                             | 54.76   | 8.89  | 34993  | 2  | 0.0036853  | 3.5502903  | 0.034079635 | 5.1316847e-294 | 0 | 0.012810049 |
| Q8C151 | Pdlim5  | PDZ and LIM domain protein 5                                 | 341.34  | 16.24 | 63299  | 7  | 0.00369845 | 2.26256555 | 0.034079635 | 2.1635931e-293 | 0 | 0.012810049 |
| Q99P31 | Hspbp1  | Hsp70-binding protein 1                                      | 459.18  | 32.21 | 39167  | 9  | 0.00370042 | 2.54920178 | 0.034079635 | 9.1092498e-293 | 0 | 0.012810049 |
| Q9CQ16 | Cotl1   | Coactosin-like protein                                       | 599.88  | 76.06 | 15944  | 12 | 0.00372971 | 1.78222265 | 0.034238959 | 3.8298431e-292 | 0 | 0.012869936 |
| Q8R016 | Blmh    | Bleomycin hydrolase                                          | 445.03  | 25.71 | 52511  | 9  | 0.00375562 | 2.60631235 | 0.034366356 | 1.6079431e-291 | 0 | 0.012917823 |
| Q9D8N0 | Eef1g   | Elongation factor 1-gamma                                    | 1473.49 | 69.57 | 50061  | 24 | 0.0037747  | 1.57401246 | 0.034430589 | 6.7414246e-291 | 0 | 0.012941967 |
| Q3TX08 | Trmt1   | tRNA (guanine(26)-N(2))-dimethyltransferase                  | 123.71  | 6.49  | 72350  | 2  | 0.00379823 | 2.47355672 | 0.034495372 | 2.8224349e-290 | 0 | 0.012966319 |
| Q68FL6 | Mars    | Methionine--tRNA ligase, cytoplasmic                         | 821.32  | 21.4  | 101431 | 14 | 0.00380766 | 2.23174803 | 0.034495372 | 1.1800147e-289 | 0 | 0.012966319 |
| Q5BJX0 | Ntmt1   | N-terminal Xaa-Pro-Lys N-methyltransferase 1                 | 54.32   | 3.14  | 25464  | 1  | 0.00381805 | 2.79155857 | 0.034495372 | 4.9265412e-289 | 0 | 0.012966319 |
| Q91VD9 | Ndufs1  | NADH-ubiquinone oxidoreductase 75 kDa subunit, mitochondrial | 703.16  | 25.45 | 79777  | 15 | 0.00384501 | 0.73289326 | 0.034551141 | 2.0539411e-288 | 0 | 0.012987281 |
| Q61316 | Hspa4   | Heat shock 70 kDa protein 4                                  | 2312.93 | 56.84 | 94133  | 39 | 0.00385508 | 1.65665032 | 0.034551141 | 8.5511587e-288 | 0 | 0.012987281 |
| P37913 | Lig1    | DNA ligase 1                                                 | 619.96  | 14.41 | 102290 | 11 | 0.00386053 | 1.66556534 | 0.034551141 | 3.5551101e-287 | 0 | 0.012987281 |
| O08997 | Atox1   | Copper transport protein ATOX1                               | 284     | 58.82 | 7338   | 4  | 0.00391191 | 2.17172252 | 0.03484342  | 1.4759519e-286 | 0 | 0.013097145 |
| Q9QYB1 | Clic4   | Chloride intracellular channel protein 4                     | 921.84  | 57.31 | 28729  | 13 | 0.00392684 | 2.08250765 | 0.03484342  | 6.1190271e-286 | 0 | 0.013097145 |
| Q9CZH3 | Psmg3   | Proteasome assembly chaperone 3                              | 90.16   | 27.05 | 13331  | 2  | 0.00393319 | 2.36630438 | 0.03484342  | 2.533282e-285  | 0 | 0.013097145 |
| Q9CVB6 | Arpc2   | Actin-related protein 2/3 complex subunit 2                  | 913.72  | 46.33 | 34357  | 15 | 0.00394201 | 1.75275136 | 0.03484342  | 1.047311e-284  | 0 | 0.013097145 |
| Q9CT10 | Ranbp3  | Ran-binding protein 3                                        | 374.52  | 16.9  | 52573  | 6  | 0.00396731 | 2.44793293 | 0.034858777 | 4.3237313e-284 | 0 | 0.013102917 |
| Q6P7P5 | Bzw1    | Basic leucine zipper and W2 domain-containing protein 1      | 165.36  | 12.65 | 48043  | 4  | 0.00396816 | 2.49533869 | 0.034858777 | 1.7825126e-283 | 0 | 0.013102917 |
| P13439 | Umps    | Uridine 5'-monophosphate synthase                            | 452.35  | 24.32 | 52292  | 9  | 0.00399282 | 1.90284907 | 0.03495461  | 7.338332e-283  | 0 | 0.013138939 |
| Q62351 | Tfrc    | Transferrin receptor protein 1                               | 1069.33 | 26.34 | 85731  | 20 | 0.0040118  | 0.71556726 | 0.03495461  | 3.0168443e-282 | 0 | 0.013138939 |
| Q8CIE6 | Copa    | Coatamer subunit alpha                                       | 1255.51 | 23.2  | 138432 | 23 | 0.00401636 | 1.59443144 | 0.03495461  | 1.2385091e-281 | 0 | 0.013138939 |
| P17427 | Ap2a2   | AP-2 complex subunit alpha-2                                 | 568.12  | 15.46 | 104017 | 11 | 0.00403846 | 1.89486185 | 0.03495461  | 5.0773399e-281 | 0 | 0.013138939 |
| Q9QYI3 | Dnajc7  | DnaJ homolog subfamily C member 7                            | 224.76  | 8.1   | 56476  | 3  | 0.00404674 | 2.18229088 | 0.03495461  | 2.0785666e-280 | 0 | 0.013138939 |
| Q64261 | Cdk6    | Cyclin-dependent kinase 6                                    | 254.71  | 26.69 | 37028  | 6  | 0.00405253 | 2.62715599 | 0.03495461  | 8.497326e-280  | 0 | 0.013138939 |
| Q68FD5 | Clte    | Clathrin heavy chain 1                                       | 4125.47 | 48.42 | 191557 | 66 | 0.00408221 | 1.42125781 | 0.035022951 | 3.4688954e-279 | 0 | 0.013164628 |
| Q91WQ3 | Yars    | Tyrosine--tRNA ligase, cytoplasmic                           | 429.69  | 22.92 | 59105  | 10 | 0.00408499 | 1.9734649  | 0.035022951 | 1.4141344e-278 | 0 | 0.013164628 |
| A2AN08 | Ubr4    | E3 ubiquitin-protein ligase UBR4                             | 309.76  | 1.31  | 572290 | 5  | 0.00410482 | 2.62825525 | 0.03508764  | 5.7567939e-278 | 0 | 0.013188944 |
| Q6MGD0 | Cuta    | Protein CutA                                                 | 41.44   | 7.91  | 18659  | 1  | 0.00413899 | 5.40698271 | 0.0352741   | 2.340244e-277  | 0 | 0.013259031 |
| Q9CQM5 | Txndc17 | Thioredoxin domain-containing protein 17                     | 175.45  | 43.9  | 14015  | 5  | 0.00417636 | 2.58708856 | 0.03535894  | 9.5001837e-277 | 0 | 0.013290921 |
| Q8C2E7 | Washc5  | WASH complex subunit 5                                       | 55.02   | 0.95  | 134110 | 1  | 0.00418484 | 2.49111784 | 0.03535894  | 3.8511749e-276 | 0 | 0.013290921 |
| Q922B2 | Dars    | Aspartate--tRNA ligase, cytoplasmic                          | 1347.24 | 53.09 | 57147  | 25 | 0.00420408 | 1.73333781 | 0.03535894  | 1.5589953e-275 | 0 | 0.013290921 |
| P70698 | Ctps1   | CTP synthase 1                                               | 300.54  | 13.54 | 66682  | 6  | 0.00420713 | 2.10254935 | 0.03535894  | 6.3021198e-275 | 0 | 0.013290921 |
| Q8K2H2 | Otud6b  | Deubiquitinase OTUD6B                                        | 56.43   | 4.42  | 33758  | 1  | 0.00421087 | 1.82136054 | 0.03535894  | 2.5440095e-274 | 0 | 0.013290921 |
| Q9DB29 | Iah1    | Isoamyl acetate-hydrolyzing esterase 1 homolog               | 51.6    | 4.42  | 27974  | 1  | 0.00422706 | 2.53459743 | 0.035390782 | 1.0255126e-273 | 0 | 0.01330289  |
| P83870 | Phf5a   | PHD finger-like domain-containing protein 5A                 | 325.33  | 47.27 | 12405  | 5  | 0.00428482 | 0.52952477 | 0.035743533 | 4.1281303e-273 | 0 | 0.013435484 |
| P97494 | Gclc    | Glutamate--cysteine ligase catalytic subunit                 | 249.43  | 10.36 | 72571  | 5  | 0.00429423 | 2.55359676 | 0.035743533 | 1.6594184e-272 | 0 | 0.013435484 |
| Q9JKX6 | Nudt5   | ADP-sugar pyrophosphatase                                    | 97.17   | 13.3  | 23984  | 2  | 0.00432038 | 1.74407689 | 0.03575398  | 6.6611378e-272 | 0 | 0.013439411 |
| O88543 | Cops3   | COP9 signalosome complex subunit 3                           | 347.55  | 21.28 | 47832  | 7  | 0.00432053 | 1.65203403 | 0.03575398  | 2.6701209e-271 | 0 | 0.013439411 |
| A2AGT5 | Ckap5   | Cytoskeleton-associated protein 5                            | 457.24  | 5.81  | 225635 | 8  | 0.00437409 | 2.12821428 | 0.036010185 | 1.0688171e-270 | 0 | 0.013535715 |
| Q9EP69 | Sacm11  | Phosphatidylinositol phosphatase SAC1                        | 227.73  | 9.2   | 66944  | 5  | 0.00437672 | 0.58997235 | 0.036010185 | 4.2723391e-270 | 0 | 0.013535715 |
| Q99MD9 | Nasp    | Nuclear autoantigenic sperm protein                          | 531.58  | 14.88 | 83954  | 7  | 0.00443536 | 1.90488985 | 0.036287295 | 1.7053671e-269 | 0 | 0.013639877 |
| Q9RON0 | Galk1   | Galactokinase                                                | 443.6   | 24.49 | 42295  | 9  | 0.00443582 | 2.34589072 | 0.036287295 | 6.7976661e-269 | 0 | 0.013639877 |
| Q91V92 | Acly    | ATP-citrate synthase                                         | 1852.34 | 31.35 | 119728 | 28 | 0.00445394 | 1.72848713 | 0.036331403 | 2.7057739e-268 | 0 | 0.013656456 |
| Q8BY71 | Hat1    | Histone acetyltransferase type B catalytic subunit           | 346.34  | 15.62 | 49278  | 5  | 0.00449582 | 2.90366523 | 0.036470685 | 1.075506e-267  | 0 | 0.013708811 |
| P63312 | Tmsb10  | Thymosin beta-10                                             | 107.43  | 47.73 | 5026   | 2  | 0.00449656 | 1.47322954 | 0.036470685 | 4.268977e-267  | 0 | 0.013708811 |
| P70218 | Map4k1  | Mitogen-activated protein kinase kinase kinase 1             | 41.66   | 1.09  | 91535  | 1  | 0.00453171 | 4.18298884 | 0.036516043 | 1.6920935e-266 | 0 | 0.01372586  |
| P62627 | Dynlrb1 | Dynein light chain roadblock-type 1                          | 100.5   | 26.04 | 10990  | 2  | 0.00453322 | 2.31896537 | 0.036516043 | 6.6975257e-266 | 0 | 0.01372586  |
| Q8K298 | Anln    | Anillin                                                      | 413.93  | 10.17 | 122794 | 7  | 0.00454052 | 2.03699755 | 0.036516043 | 2.6472434e-265 | 0 | 0.01372586  |

|        |          |                                                                                                           |         |       |        |    |            |            |             |                |   |             |
|--------|----------|-----------------------------------------------------------------------------------------------------------|---------|-------|--------|----|------------|------------|-------------|----------------|---|-------------|
| P29452 | Casp1    | Caspase-1                                                                                                 | 368.14  | 20.4  | 45640  | 7  | 0.00456577 | 1.97592971 | 0.036615939 | 1.0448712e-264 | 0 | 0.013763409 |
| Q8R1F5 | Hyi      | Putative hydroxypyruvate isomerase                                                                        | 192.08  | 17.69 | 30449  | 4  | 0.0046053  | 2.68640608 | 0.036829531 | 4.1183285e-264 | 0 | 0.013843695 |
| Q7TQH0 | Atxn2l   | Ataxin-2-like protein                                                                                     | 476.95  | 12.2  | 110649 | 9  | 0.00467551 | 2.03439096 | 0.037193515 | 1.6209458e-263 | 0 | 0.013980512 |
| Q2L4X1 | Bzw2     | Basic leucine zipper and W2 domain-containing protein 2 OS=Mus musculus molossinus (Japanese house mouse) | 136.41  | 8.83  | 48063  | 3  | 0.00467761 | 1.65985865 | 0.037193515 | 6.3709649e-263 | 0 | 0.013980512 |
| Q9DBL7 | Coasy    | Bifunctional coenzyme A synthase                                                                          | 248.51  | 14.03 | 62023  | 5  | 0.0046899  | 1.87399365 | 0.037193515 | 2.5005244e-262 | 0 | 0.013980512 |
| Q91YR5 | Mettl13  | Methyltransferase-like protein 13                                                                         | 87.05   | 3.01  | 78757  | 2  | 0.00470925 | 2.4975636  | 0.037243515 | 9.8004514e-262 | 0 | 0.013999306 |
| Q9D338 | Mrpl19   | 39S ribosomal protein L19, mitochondrial                                                                  | 249.54  | 15.07 | 33578  | 5  | 0.00472933 | 0.66682781 | 0.037298973 | 3.8357484e-261 | 0 | 0.014020152 |
| Q8K202 | Polr1e   | DNA-directed RNA polymerase 1 subunit RPA49                                                               | 115.42  | 4.56  | 54034  | 2  | 0.00475722 | 0.37455363 | 0.037415585 | 1.4991432e-260 | 0 | 0.014063985 |
| P63242 | Eif5a    | Eukaryotic translation initiation factor 5A-1                                                             | 901.79  | 69.48 | 16832  | 14 | 0.00477579 | 1.7629956  | 0.037458442 | 5.8509318e-260 | 0 | 0.014080094 |
| P22682 | Cbl      | E3 ubiquitin-protein ligase CBL                                                                           | 75.93   | 1.64  | 100564 | 1  | 0.00485069 | 4.40474508 | 0.037828349 | 2.2803201e-259 | 0 | 0.014219137 |
| P97372 | Psme2    | Proteasome activator complex subunit 2                                                                    | 410.75  | 39.33 | 27057  | 6  | 0.00486189 | 1.76688724 | 0.037828349 | 8.8747349e-259 | 0 | 0.014219137 |
| O08618 | Prpsap2  | Phosphoribosyl pyrophosphate synthase-associated protein 2                                                | 179.36  | 11.92 | 40867  | 3  | 0.0048627  | 2.06253887 | 0.037828349 | 3.4490833e-258 | 0 | 0.014219137 |
| Q9CSU0 | Rprd1b   | Regulation of nuclear pre-mRNA domain-containing protein 1B                                               | 189.71  | 16.56 | 36884  | 4  | 0.00488359 | 1.66085243 | 0.037887641 | 1.3385687e-257 | 0 | 0.014241424 |
| Q02053 | Uba1     | Ubiquitin-like modifier-activating enzyme 1                                                               | 1796.89 | 34.5  | 117809 | 27 | 0.00490703 | 1.88356472 | 0.037966332 | 5.1875969e-257 | 0 | 0.014271003 |
| O08638 | Myh11    | Myosin-11                                                                                                 | 590.56  | 5.48  | 227028 | 11 | 0.00499339 | 1.41159707 | 0.038530061 | 2.0076145e-256 | 0 | 0.014482901 |
| P80315 | Cct4     | T-complex protein 1 subunit delta                                                                         | 2112.64 | 60.67 | 58066  | 29 | 0.00502424 | 1.73844345 | 0.038575321 | 7.7585915e-256 | 0 | 0.014499913 |
| Q99J14 | Psm6     | 26S proteasome non-ATPase regulatory subunit 6                                                            | 490.5   | 28.79 | 45536  | 10 | 0.00503149 | 1.69713983 | 0.038575321 | 2.9941521e-255 | 0 | 0.014499913 |
| P97823 | Lypl1    | Acyl-protein thioesterase 1                                                                               | 243.92  | 26.52 | 24688  | 4  | 0.00504534 | 2.35535751 | 0.038575321 | 1.1538601e-254 | 0 | 0.014499913 |
| Q63468 | Prpsap1  | Phosphoribosyl pyrophosphate synthase-associated protein 1                                                | 397.12  | 25.84 | 39436  | 7  | 0.0050533  | 2.22854087 | 0.038575321 | 4.440386e-254  | 0 | 0.014499913 |
| Q9Z0M5 | Lipa     | Lysosomal acid lipase/cholesterol ester hydrolase                                                         | 105.58  | 4.79  | 45325  | 2  | 0.00509672 | 2.78353788 | 0.038803014 | 1.7063829e-253 | 0 | 0.0145855   |
| Q6A0A2 | Larp4b   | La-related protein 4B                                                                                     | 64.5    | 2.29  | 81627  | 1  | 0.0051671  | 5.86774309 | 0.039234263 | 6.5481768e-253 | 0 | 0.0147476   |
| Q09200 | B4galnt1 | Beta-1,4 N-acetylgalactosaminyltransferase 1                                                              | 113.11  | 9.94  | 59212  | 3  | 0.00520198 | 0.57649387 | 0.039311564 | 2.5092986e-252 | 0 | 0.014776656 |
| Q9CPN8 | Igf2bp3  | Insulin-like growth factor 2 mRNA-binding protein 3                                                       | 718.01  | 25.04 | 63575  | 12 | 0.00520482 | 1.58613127 | 0.039311564 | 9.6022342e-252 | 0 | 0.014776656 |
| O08553 | Dpysl2   | Dihydropyrimidinase-related protein 2                                                                     | 1562.05 | 53.5  | 62278  | 23 | 0.00524517 | 1.31096077 | 0.039511735 | 3.6692741e-251 | 0 | 0.014851898 |
| Q9WV03 | Fam50a   | Protein FAM50A                                                                                            | 137.26  | 12.68 | 40252  | 3  | 0.00527148 | 1.90574902 | 0.039605481 | 1.4001542e-250 | 0 | 0.014887136 |
| P05201 | Got1     | Aspartate aminotransferase, cytoplasmic                                                                   | 924.57  | 44.79 | 46248  | 16 | 0.00535063 | 1.71883766 | 0.040094628 | 5.3353062e-250 | 0 | 0.015070999 |
| P42208 | Sept2    | Septin-2                                                                                                  | 584.36  | 35.73 | 41526  | 9  | 0.00538269 | 1.34656484 | 0.040229274 | 2.0301612e-249 | 0 | 0.015121611 |
| P29067 | Arb2     | Beta-arrestin-2                                                                                           | 574.04  | 23.17 | 46340  | 10 | 0.00540301 | 1.63185773 | 0.040275717 | 7.7141725e-249 | 0 | 0.015139068 |
| P10711 | Tcea1    | Transcription elongation factor A protein 1                                                               | 529.83  | 39.87 | 33880  | 9  | 0.00543404 | 2.29045707 | 0.040401554 | 2.9270875e-248 | 0 | 0.015186368 |
| Q9WVA3 | Bub3     | Mitotic checkpoint protein BUB3                                                                           | 519.29  | 29.45 | 36955  | 9  | 0.00548172 | 1.32025427 | 0.040556638 | 1.1090971e-247 | 0 | 0.015244662 |
| P97429 | Anxa4    | Annexin A4                                                                                                | 1299.64 | 55.17 | 35916  | 18 | 0.00548331 | 0.71226128 | 0.040556638 | 4.1965345e-247 | 0 | 0.015244662 |
| Q61792 | Lasp1    | LIM and SH3 domain protein 1                                                                              | 380.74  | 20.15 | 29994  | 6  | 0.00551118 | 1.79878452 | 0.040617986 | 1.585621e-246  | 0 | 0.015267722 |
| Q4KM65 | Nudt21   | Cleavage and polyadenylation specificity factor subunit 5 =2                                              | 384.5   | 36.12 | 26240  | 7  | 0.00552006 | 1.36141504 | 0.040617986 | 5.9826722e-246 | 0 | 0.015267722 |
| Q9ESL4 | Map3k20  | Mitogen-activated protein kinase kinase kinase                                                            | 49.37   | 1.37  | 91720  | 1  | 0.00559181 | 2.37155768 | 0.04078946  | 2.2541261e-245 | 0 | 0.015332176 |
| Q9CQX2 | Cyb5b    | Cytochrome b5 type B                                                                                      | 95.89   | 15.75 | 16318  | 2  | 0.0055933  | 0.69418288 | 0.04078946  | 8.4810242e-245 | 0 | 0.015332176 |
| Q5M823 | Nudcd2   | NudC domain-containing protein 2                                                                          | 356.7   | 43.95 | 17674  | 6  | 0.00560284 | 1.82210844 | 0.04078946  | 3.1864376e-244 | 0 | 0.015332176 |
| P35444 | Comp     | Cartilage oligomeric matrix protein                                                                       | 38.6    | 1.06  | 82664  | 1  | 0.00563258 | 3.17840437 | 0.04078946  | 1.1954997e-243 | 0 | 0.015332176 |
| Q6URW6 | Myh14    | Myosin-14                                                                                                 | 471.68  | 4.1   | 228586 | 9  | 0.00563287 | 1.40389211 | 0.04078946  | 4.478993e-243  | 0 | 0.015332176 |
| P62482 | Kcnab2   | Voltage-gated potassium channel subunit beta-2                                                            | 227.05  | 22.62 | 41021  | 5  | 0.00563724 | 2.82678233 | 0.04078946  | 1.675707e-242  | 0 | 0.015332176 |
| P05063 | Aldoc    | Fructose-bisphosphate aldolase C                                                                          | 1552.97 | 64.74 | 39395  | 24 | 0.00564338 | 1.81975169 | 0.04078946  | 6.2604056e-242 | 0 | 0.015332176 |
| Q9QXG4 | Acss2    | Acetyl-coenzyme A synthetase, cytoplasmic                                                                 | 195.12  | 6.42  | 78862  | 3  | 0.00567906 | 2.82906871 | 0.040849784 | 2.3355732e-241 | 0 | 0.015354851 |
| Q8BMJ3 | Eif1ax   | Eukaryotic translation initiation factor 1A, X-chromosomal =2                                             | 257.75  | 36.81 | 16460  | 5  | 0.00569346 | 1.77958202 | 0.040849784 | 8.701037e-241  | 0 | 0.015354851 |
| Q8R4X3 | Rbm12    | RNA-binding protein 12                                                                                    | 166.15  | 4.03  | 102796 | 4  | 0.00569465 | 2.87740812 | 0.040849784 | 3.2369427e-240 | 0 | 0.015354851 |
| P24547 | Impdh2   | Inosine-5'-monophosphate dehydrogenase 2                                                                  | 1327.83 | 39.49 | 55815  | 21 | 0.00576235 | 1.93530609 | 0.041130473 | 1.2025008e-239 | 0 | 0.015460358 |
| P83732 | Rpl24    | 60S ribosomal protein L24                                                                                 | 525.09  | 37.58 | 17779  | 10 | 0.00576259 | 1.60988815 | 0.041130473 | 4.4608952e-239 | 0 | 0.015460358 |
| Q8VE47 | Uba5     | Ubiquitin-like modifier-activating enzyme 5                                                               | 172.25  | 12.16 | 44790  | 3  | 0.00584772 | 3.8229462  | 0.041530951 | 1.6525129e-238 | 0 | 0.015610892 |
| Q9Z120 | Mettl1   | tRNA (guanine-N(7)-)-methyltransferase                                                                    | 51.03   | 5.6   | 36703  | 1  | 0.00584779 | 4.68577015 | 0.041530951 | 6.1129919e-238 | 0 | 0.015610892 |
| P54103 | Dnajc2   | DnaJ homolog subfamily C member 2                                                                         | 106.76  | 5.64  | 71722  | 2  | 0.00587671 | 3.59983934 | 0.041614304 | 2.2581293e-237 | 0 | 0.015642224 |
| Q3UFY7 | Nt5c3b   | 7-methylguanosine phosphate-specific 5'-nucleotidase                                                      | 74.92   | 6.67  | 34425  | 2  | 0.00588868 | 2.43508794 | 0.041614304 | 8.3297073e-237 | 0 | 0.015642224 |



|        |          |                                                                |         |       |        |    |            |            |             |                |                |             |
|--------|----------|----------------------------------------------------------------|---------|-------|--------|----|------------|------------|-------------|----------------|----------------|-------------|
| P98078 | Dab2     | Disabled homolog 2                                             | 1050.78 | 29.63 | 82312  | 15 | 0.00603409 | 1.73381721 | 0.042412412 | 3.0682909e-236 | 0              | 0.015942221 |
| Q9D8W5 | Psm12    | 26S proteasome non-ATPase regulatory subunit 12                | 660.49  | 26.75 | 52895  | 12 | 0.0060445  | 1.73240867 | 0.042412412 | 1.1286235e-235 | 0              | 0.015942221 |
| Q9D8E6 | Rpl4     | 60S ribosomal protein L4                                       | 1231.25 | 43.44 | 47154  | 19 | 0.00605106 | 1.31501654 | 0.042412412 | 4.1455992e-235 | 0              | 0.015942221 |
| P23492 | Pnp      | Purine nucleoside phosphorylase                                | 615.23  | 31.83 | 32277  | 10 | 0.00606104 | 2.48730988 | 0.042412412 | 1.5205865e-234 | 0              | 0.015942221 |
| Q9DCD0 | Pgd      | 6-phosphogluconate dehydrogenase, decarboxylating              | 1873.08 | 56.52 | 53247  | 26 | 0.0061289  | 1.63372804 | 0.042669553 | 5.5695544e-234 | 0              | 0.016038877 |
| O35129 | Phb2     | Prohibitin-2                                                   | 1314.53 | 74.25 | 33296  | 22 | 0.00613952 | 0.67416531 | 0.042669553 | 2.0371133e-233 | 0              | 0.016038877 |
| Q3ZAV8 | Edc4     | Enhancer of mRNA-decapping protein 4                           | 254.96  | 5.12  | 152596 | 4  | 0.00614262 | 2.46379115 | 0.042669553 | 7.4403819e-233 | 0              | 0.016038877 |
| Q64701 | Rbl1     | Retinoblastoma-like protein 1                                  | 57.19   | 0.85  | 119456 | 1  | 0.00615889 | 3.07850634 | 0.042678733 | 2.7136917e-232 | 0              | 0.016042327 |
| D3ZZW6 | Hils1    | Spermatid-specific linker histone H1-like protein              | 37.27   | 4.14  | 18617  | 1  | 0.00619043 | 2.68735178 | 0.042711892 | 9.8835034e-232 | 0              | 0.016054791 |
| Q00519 | Xdh      | Xanthine dehydrogenase/oxidase                                 | 738.76  | 15.43 | 146562 | 13 | 0.0061936  | 1.74644935 | 0.042711892 | 3.5945652e-231 | 0              | 0.016054791 |
| O70325 | Gpx4     | Phospholipid hydroperoxide glutathione peroxidase              | 95.59   | 11.68 | 22229  | 2  | 0.00622928 | 1.89466517 | 0.042854442 | 1.3054696e-230 | 0              | 0.016108374 |
| P61078 | Ube2d3   | Ubiquitin-conjugating enzyme E2 D3                             | 189.62  | 36.05 | 16687  | 3  | 0.00637929 | 2.9361526  | 0.043780914 | 4.7344772e-230 | 0              | 0.016456621 |
| Q9D0F9 | Pgm1     | Phosphoglucomutase-1                                           | 431.85  | 17.08 | 61418  | 7  | 0.00639796 | 1.82094558 | 0.043803784 | 1.7145969e-229 | 0              | 0.016465218 |
| O70194 | Eif3d    | Eukaryotic translation initiation factor 3 subunit D           | 987.19  | 39.42 | 63989  | 16 | 0.00644004 | 1.84514978 | 0.043863657 | 6.2006429e-229 | 0              | 0.016487723 |
| Q9CXW3 | Cacybp   | Calcyclin-binding protein                                      | 332.08  | 27.07 | 26510  | 6  | 0.00644162 | 2.10831289 | 0.043863657 | 2.2392159e-228 | 0              | 0.016487723 |
| Q9JHR7 | Ide      | Insulin-degrading enzyme                                       | 208.6   | 6.18  | 117772 | 5  | 0.00645733 | 3.6663639  | 0.043863657 | 8.0749473e-228 | 0              | 0.016487723 |
| Q8RIQ8 | Dync1l1  | Cytoplasmic dynein 1 light intermediate chain 1                | 437.14  | 22.18 | 56614  | 7  | 0.00646816 | 2.00165858 | 0.043863657 | 2.9078218e-227 | 0              | 0.016487723 |
| Q9JM90 | Stap1    | Signal-transducing adaptor protein 1                           | 307.24  | 36.03 | 34628  | 7  | 0.00650804 | 1.4104395  | 0.044029514 | 1.0456351e-226 | 0              | 0.016550067 |
| Q9JUT0 | Rcl1     | RNA 3'-terminal phosphate cyclase-like protein                 | 40.41   | 2.14  | 40841  | 1  | 0.00652937 | 2.28972131 | 0.044069418 | 3.7547127e-226 | 0              | 0.016565066 |
| Q8OU87 | Usp8     | Ubiquitin carboxyl-terminal hydrolase 8                        | 305.92  | 7.96  | 122611 | 7  | 0.00654616 | 2.05181841 | 0.04407852  | 1.346348e-225  | 0              | 0.016568487 |
| Q8COC7 | Farsa    | Phenylalanine--tRNA ligase alpha subunit                       | 426.86  | 15.94 | 57599  | 9  | 0.00657947 | 1.87635883 | 0.044198586 | 4.8208315e-225 | 0              | 0.016613618 |
| Q9QXK3 | Copg2    | Coatomer subunit gamma-2                                       | 486.4   | 11.14 | 97681  | 8  | 0.00659819 | 1.81102758 | 0.044220267 | 1.7237348e-224 | 0              | 0.016621768 |
| O54940 | Bnip2    | BCL2/adenovirus E1B 19 kDa protein-interacting protein 2       | 69.71   | 7.67  | 37769  | 2  | 0.00666301 | 2.28902636 | 0.044550092 | 6.1546407e-224 | 0              | 0.016745745 |
| O54984 | Asna1    | ATPase Asna1                                                   | 230.76  | 14.08 | 38823  | 5  | 0.00671416 | 1.86585275 | 0.044787207 | 2.1944144e-223 | 0              | 0.016834873 |
| Q9EPB4 | Pycard   | Apoptosis-associated speck-like protein containing a CARD      | 168.67  | 25.39 | 21459  | 3  | 0.00675571 | 2.52268986 | 0.04482168  | 7.8130061e-223 | 0              | 0.01684783  |
| P25113 | Pgam1    | Phosphoglycerate mutase 1                                      | 1504.19 | 77.17 | 28832  | 22 | 0.00681622 | 1.68173055 | 0.04482168  | 2.7778011e-222 | 0              | 0.01684783  |
| P70697 | Urod     | Uroporphyrinogen decarboxylase                                 | 325.71  | 25.89 | 40692  | 6  | 0.00681714 | 1.45771733 | 0.04482168  | 9.8620569e-222 | 0              | 0.01684783  |
| Q78PY7 | Snd1     | Staphylococcal nuclease domain-containing protein 1            | 2541.63 | 56.15 | 102088 | 42 | 0.00681769 | 1.46504178 | 0.04482168  | 3.4963678e-221 | 0              | 0.01684783  |
| Q9Z0N1 | Eif2s3x  | Eukaryotic translation initiation factor 2 subunit 3, X-linked | 1076    | 43.64 | 51065  | 18 | 0.00681801 | 1.43493524 | 0.04482168  | 1.2377983e-220 | 0              | 0.01684783  |
| P43277 | Hist1h1d | Histone H1.3                                                   | 813.93  | 38.01 | 22100  | 13 | 0.00684338 | 0.50916791 | 0.04482168  | 4.3758831e-220 | 4.9406565e-324 | 0.01684783  |
| Q78ZA7 | Nap1l4   | Nucleosome assembly protein 1-like 4                           | 581.64  | 29.87 | 42679  | 8  | 0.00684464 | 1.66369498 | 0.04482168  | 1.5447723e-219 | 2.4703282e-323 | 0.01684783  |
| Q80X50 | Ubap2l   | Ubiquitin-associated protein 2-like                            | 395.32  | 10.03 | 116799 | 6  | 0.00684492 | 2.03690191 | 0.04482168  | 5.4456045e-219 | 1.5316035e-322 | 0.01684783  |
| Q99LE6 | Abcf2    | ATP-binding cassette sub-family F member 2                     | 124.97  | 5.57  | 71782  | 3  | 0.00690356 | 2.69060936 | 0.045065665 | 1.9169485e-218 | 9.0908079e-322 | 0.016939541 |
| Q6P6U0 | Fgr      | Tyrosine-protein kinase Fgr                                    | 82.48   | 2.9   | 58821  | 2  | 0.00691375 | 1.7132148  | 0.045065665 | 6.7384095e-218 | 5.4594254e-321 | 0.016939541 |
| Q4QQT6 | Brix1    | Ribosome biogenesis protein BRX1 homolog                       | 199.78  | 13.07 | 41115  | 5  | 0.00696295 | 0.59448842 | 0.045282943 | 2.3653035e-217 | 3.2677502e-320 | 0.017021213 |
| Q5U211 | Snx3     | Sorting nexin-3                                                | 327.21  | 52.47 | 18762  | 6  | 0.00698745 | 1.62607385 | 0.04533905  | 8.2908444e-217 | 1.9467669e-319 | 0.017042303 |
| Q8VCN5 | Cth      | Cystathionine gamma-lyase                                      | 407.83  | 22.61 | 43567  | 7  | 0.00700793 | 1.80907322 | 0.045368816 | 2.9019702e-216 | 1.1567658e-318 | 0.017053491 |
| Q5U2Z5 | Cmtr1    | Cap-specific mRNA (nucleoside-2'-O-)-methyltransferase 1       | 66.09   | 1.79  | 95619  | 2  | 0.00702654 | 2.9067964  | 0.045380525 | 1.0143067e-215 | 6.8571519e-318 | 0.017057892 |
| Q3SWU3 | Hnrmpd1  | Heterogeneous nuclear ribonucleoprotein D-like                 | 123.18  | 16.46 | 35294  | 3  | 0.00704577 | 0.65139699 | 0.045380525 | 3.5401995e-215 | 4.0557207e-317 | 0.017057892 |
| Q64378 | Fkbp5    | Peptidyl-prolyl cis-trans isomerase FKBP5                      | 520.51  | 25.44 | 50966  | 10 | 0.00712031 | 1.55158384 | 0.045380525 | 1.2338664e-214 | 2.3933204e-316 | 0.017057892 |
| Q9JMH6 | Txnrd1   | Thioredoxin reductase 1, cytoplasmic                           | 1055.88 | 42.09 | 67084  | 15 | 0.00713241 | 1.84782982 | 0.045380525 | 4.2942802e-214 | 1.4036648e-315 | 0.017057892 |
| P42567 | Eps15    | Epidermal growth factor receptor substrate 15                  | 51.17   | 1.23  | 98471  | 1  | 0.00714596 | 4.28713371 | 0.045380525 | 1.4924313e-213 | 8.2178841e-315 | 0.017057892 |
| O89023 | Tpp1     | Tripeptidyl-peptidase 1                                        | 296.49  | 13.7  | 61342  | 5  | 0.0071549  | 1.62971152 | 0.045380525 | 5.179406e-213  | 4.8022768e-314 | 0.017057892 |
| Q91YP3 | Dera     | Deoxyribose-phosphate aldolase                                 | 254.64  | 20.75 | 34975  | 5  | 0.00716126 | 1.89421225 | 0.045380525 | 1.7949281e-212 | 2.8019742e-313 | 0.017057892 |
| P99027 | Rplp2    | 60S acidic ribosomal protein P2                                | 263.26  | 62.61 | 11651  | 3  | 0.00716341 | 2.17258442 | 0.045380525 | 6.2114867e-212 | 1.6326313e-312 | 0.017057892 |
| O35593 | Psm14    | 26S proteasome non-ATPase regulatory subunit 14                | 324.09  | 27.1  | 34577  | 6  | 0.007176   | 2.35039481 | 0.045380525 | 2.1464725e-211 | 9.5026509e-312 | 0.017057892 |
| P62959 | Hint1    | Histidine triad nucleotide-binding protein 1                   | 189.29  | 42.06 | 13777  | 4  | 0.00718104 | 2.4649992  | 0.045380525 | 7.4068962e-211 | 5.5210401e-311 | 0.017057892 |
| Q9QUR6 | Prep     | Prolyl endopeptidase                                           | 725.52  | 24.23 | 80752  | 13 | 0.00719653 | 2.01997787 | 0.045380525 | 2.5522795e-210 | 3.2036304e-310 | 0.017057892 |
| Q8BGD9 | Eif4b    | Eukaryotic translation initiation factor 4B                    | 620.45  | 20.79 | 68840  | 10 | 0.00721203 | 1.39728324 | 0.045380525 | 8.7821554e-210 | 1.8552257e-309 | 0.017057892 |
| Q8K214 | Manba    | Beta-mannosidase                                               | 285.63  | 6.6   | 100831 | 6  | 0.00721638 | 3.07340391 | 0.045380525 | 3.0175523e-209 | 1.0722218e-308 | 0.017057892 |

|        |           |                                                                                   |         |       |        |    |            |            |             |                |                 |             |
|--------|-----------|-----------------------------------------------------------------------------------|---------|-------|--------|----|------------|------------|-------------|----------------|-----------------|-------------|
| Q99N69 | Lpxn      | Leupaxin                                                                          | 263.87  | 17.88 | 43478  | 6  | 0.00725674 | 2.33403524 | 0.045534043 | 1.0353548e-208 | 6.1892449e-308  | 0.017115597 |
| P15864 | Hist1h1c  | Histone H1.2                                                                      | 908.99  | 43.4  | 21267  | 14 | 0.00731404 | 0.51570212 | 0.045719444 | 3.5473508e-208 | 3.5595105e-307  | 0.017185287 |
| O35226 | Psmd4     | 26S proteasome non-ATPase regulatory subunit 4                                    | 465.89  | 32.45 | 40704  | 8  | 0.00731831 | 1.42849241 | 0.045719444 | 1.2136669e-207 | 2.0372966e-306  | 0.017185287 |
| Q05D44 | Eif5b     | Eukaryotic translation initiation factor 5B                                       | 662.45  | 18.83 | 137616 | 14 | 0.00733704 | 2.01933919 | 0.045736365 | 4.1464386e-207 | 1.1646315e-305  | 0.017191647 |
| Q60864 | Stip1     | Stress-induced-phosphoprotein 1                                                   | 1023.65 | 37.57 | 62582  | 19 | 0.0073792  | 1.7885527  | 0.045898955 | 1.4145918e-206 | 6.6431034e-305  | 0.017252763 |
| Q9JHU9 | Isyn1     | Inositol-3-phosphate synthase 1                                                   | 818.03  | 29.62 | 60932  | 14 | 0.00741395 | 1.79778404 | 0.04593879  | 4.8191133e-206 | 3.7750625e-304  | 0.017267736 |
| P53534 | Pygb      | Glycogen phosphorylase, brain form                                                | 585.22  | 16.71 | 96174  | 10 | 0.00741779 | 1.97380091 | 0.04593879  | 1.639393e-205  | 2.1383045e-303  | 0.017267736 |
| Q8CHP8 | Pgp       | Glycerol-3-phosphate phosphatase                                                  | 436.34  | 35.2  | 34541  | 8  | 0.00747113 | 2.33961052 | 0.046168979 | 5.5690211e-205 | 1.20976e-302    | 0.017354261 |
| Q9CY64 | Blvra     | Biliverdin reductase A                                                            | 357.3   | 18.64 | 33525  | 7  | 0.00750914 | 1.81834408 | 0.046303634 | 1.8890974e-204 | 6.8139047e-302  | 0.017404876 |
| Q9Z0Y1 | Dctn3     | Dynactin subunit 3                                                                | 38      | 4.3   | 20978  | 1  | 0.00755398 | 2.80869922 | 0.046479743 | 6.3989603e-204 | 3.8247862e-301  | 0.017471073 |
| P11983 | Tep1      | T-complex protein 1 subunit alpha                                                 | 2145.54 | 64.57 | 60449  | 31 | 0.00757772 | 1.61480301 | 0.04652556  | 2.164432e-203  | 2.1386836e-300  | 0.017488295 |
| Q5XI41 | Tram1     | Translocating chain-associated membrane protein 1                                 | 194.05  | 6.95  | 43030  | 3  | 0.00761004 | 0.5845295  | 0.046623724 | 7.3106803e-203 | 1.19229285e-299 | 0.017525193 |
| Q8BKC5 | Ipo5      | Importin-5                                                                        | 778.2   | 19.05 | 123591 | 14 | 0.00765254 | 1.74111687 | 0.046783724 | 2.4657602e-202 | 6.6339705e-299  | 0.017585335 |
| Q64737 | Gart      | Trifunctional purine biosynthetic protein adenosine-3                             | 1890.06 | 40.79 | 107503 | 29 | 0.00766986 | 1.76470249 | 0.046789453 | 8.3046814e-202 | 3.6757473e-298  | 0.017587488 |
| Q9Z1D1 | Eif3g     | Eukaryotic translation initiation factor 3 subunit G                              | 286.33  | 14.69 | 35638  | 5  | 0.00768709 | 1.52133001 | 0.046794549 | 2.79302e-201   | 2.0325169e-297  | 0.017589404 |
| Q9CZ30 | Ola1      | Obg-like ATPase 1                                                                 | 564.72  | 28.03 | 44730  | 9  | 0.00776947 | 2.19304201 | 0.047023608 | 9.3800237e-201 | 1.1216125e-296  | 0.017675504 |
| P67984 | Rpl22     | 60S ribosomal protein L22                                                         | 333.52  | 39.84 | 14759  | 5  | 0.00777038 | 1.71853035 | 0.047023608 | 3.1456653e-200 | 6.1515928e-296  | 0.017675504 |
| Q6WVG3 | Kctd12    | BTB/POZ domain-containing protein KCTD12                                          | 561.19  | 42.2  | 35892  | 9  | 0.00778501 | 1.62230335 | 0.047023608 | 1.0534154e-199 | 3.3705834e-295  | 0.017675504 |
| Q9WUK4 | Rfc2      | Replication factor C subunit 2                                                    | 65.54   | 4.87  | 38725  | 2  | 0.00779866 | 2.4732084  | 0.047023608 | 3.5226152e-199 | 1.8434068e-294  | 0.017675504 |
| Q9DBG5 | Plin3     | Perilipin-3                                                                       | 847.34  | 42.79 | 47262  | 13 | 0.00785389 | 1.72692256 | 0.047023608 | 1.1762755e-198 | 1.0063817e-293  | 0.017675504 |
| Q7TSS2 | Ube2q1    | Ubiquitin-conjugating enzyme E2 Q1                                                | 38.05   | 1.9   | 46173  | 1  | 0.00785406 | 3.06128822 | 0.047023608 | 3.922212e-198  | 5.4702576e-293  | 0.017675504 |
| Q9ERK4 | Cse11     | Exportin-2                                                                        | 802.11  | 18.54 | 110455 | 15 | 0.00789034 | 1.54449041 | 0.047023608 | 1.3059637e-197 | 2.9706041e-292  | 0.017675504 |
| P62278 | Rps13     | 40S ribosomal protein S13                                                         | 404.73  | 43.71 | 17222  | 8  | 0.00790672 | 2.01241563 | 0.047023608 | 4.3421921e-197 | 1.6080674e-291  | 0.017675504 |
| Q6P5G6 | Ubxn7     | UBX domain-containing protein 7                                                   | 42.95   | 1.93  | 52164  | 1  | 0.00790766 | 3.25561281 | 0.047023608 | 1.4416662e-196 | 8.6880451e-291  | 0.017675504 |
| O88456 | Capns1    | Calpain small subunit 1                                                           | 189.41  | 15.99 | 28463  | 3  | 0.00792412 | 1.27678267 | 0.047023608 | 4.7796713e-196 | 4.6893229e-290  | 0.017675504 |
| Q99J77 | Nans      | Sialic acid synthase                                                              | 490.18  | 37.05 | 40024  | 9  | 0.00793508 | 2.24277646 | 0.047023608 | 1.5823729e-195 | 2.5261234e-289  | 0.017675504 |
| P27870 | Vav1      | Proto-oncogene vav                                                                | 383.45  | 11.12 | 98137  | 8  | 0.00795862 | 1.62161135 | 0.047023608 | 5.2311476e-195 | 1.3586318e-288  | 0.017675504 |
| P29066 | Arrb1     | Beta-arrestin-1                                                                   | 217.49  | 11.96 | 47020  | 5  | 0.00798315 | 1.70536907 | 0.047023608 | 1.7268807e-194 | 7.2898573e-288  | 0.017675504 |
| Q8R317 | Ubqln1    | Ubiquilin-1                                                                       | 106.21  | 5.5   | 61976  | 2  | 0.00798955 | 2.15652315 | 0.047023608 | 5.6925228e-194 | 3.9019553e-287  | 0.017675504 |
| Q9Z0G0 | Gipc1     | PDZ domain-containing protein GIPC1                                               | 108.48  | 8.71  | 36129  | 2  | 0.00799121 | 3.43698779 | 0.047023608 | 1.873804e-193  | 2.0857875e-286  | 0.017675504 |
| O35900 | Lsm2      | U6 snRNA-associated Sm-like protein LSm2                                          | 120.7   | 20    | 10835  | 1  | 0.00799141 | 2.13094294 | 0.047023608 | 6.1591435e-193 | 1.1137974e-285  | 0.017675504 |
| Q9D8Y7 | Tnfaip812 | Tumor necrosis factor alpha-induced protein 8-like protein 2                      | 57.02   | 7.61  | 20615  | 1  | 0.00800472 | 3.07808667 | 0.047023608 | 2.0215903e-192 | 5.9419417e-285  | 0.017675504 |
| P63323 | Rps12     | 40S ribosomal protein S12                                                         | 632.64  | 62.88 | 14525  | 10 | 0.00802287 | 1.7334164  | 0.047033463 | 6.6258637e-192 | 3.1644024e-284  | 0.017679208 |
| P80313 | Cct7      | T-complex protein 1 subunit eta                                                   | 2365.11 | 69.49 | 59652  | 36 | 0.00804074 | 1.73947852 | 0.047068301 | 2.1685439e-191 | 1.6817827e-283  | 0.017692303 |
| Q9JL35 | Hmgn5     | High mobility group nucleosome-binding domain-containing protein 5                | 149.55  | 10.1  | 45344  | 4  | 0.00807204 | 1.42439494 | 0.047068301 | 7.0871263e-191 | 8.9165702e-283  | 0.017692303 |
| P80317 | Cct6a     | T-complex protein 1 subunit zeta                                                  | 1456.67 | 53.3  | 58004  | 26 | 0.00807926 | 1.61717316 | 0.047068301 | 2.312854e-190  | 4.716014e-282   | 0.017692303 |
| O54747 | Pold1     | DNA polymerase delta catalytic subunit 2                                          | 298.75  | 6.26  | 123601 | 7  | 0.00809476 | 1.8887157  | 0.047068301 | 7.537064e-190  | 2.4908874e-281  | 0.017692303 |
| P05132 | Prkaca    | cAMP-dependent protein kinase catalytic subunit alpha                             | 277.34  | 16.24 | 40571  | 5  | 0.0081253  | 1.86260395 | 0.047149833 | 2.4526298e-189 | 1.3131689e-280  | 0.01772295  |
| P23198 | Cbx3      | Chromobox protein homolog 3                                                       | 704.38  | 36.61 | 20855  | 10 | 0.00819582 | 0.80348985 | 0.047462603 | 7.969617e-189  | 6.9038002e-280  | 0.017840516 |
| P35505 | Fah       | Fumarylacetoacetase                                                               | 112.53  | 8.35  | 46176  | 2  | 0.00822505 | 2.38255824 | 0.047512778 | 2.5859398e-188 | 3.6111003e-279  | 0.017859376 |
| P02798 | Mt2       | Metallothionein-2                                                                 | 66.51   | 19.67 | 6115   | 1  | 0.00823777 | 2.11729787 | 0.047512778 | 8.3786634e-188 | 1.8838106e-278  | 0.017859376 |
| O88844 | Idh1      | Isocitrate dehydrogenase [NADP] cytoplasmic                                       | 804.68  | 35.27 | 46674  | 14 | 0.00825953 | 1.93935448 | 0.047542281 | 2.710855e-187  | 9.8107442e-278  | 0.017870465 |
| Q6P9R2 | Oxsr1     | Serine/threonine-protein kinase OSR1                                              | 41.43   | 1.52  | 58214  | 1  | 0.00835677 | 2.44078635 | 0.048005192 | 8.7581608e-187 | 5.0980651e-277  | 0.018044467 |
| Q9Z1F9 | Uba2      | SUMO-activating enzyme subunit 2                                                  | 895.4   | 44.83 | 70569  | 16 | 0.00839548 | 1.99801439 | 0.048061956 | 2.8254944e-186 | 2.6318471e-276  | 0.018065804 |
| Q3UM18 | Lsg1      | Large subunit GTPase 1 homolog                                                    | 43.9    | 2.17  | 73157  | 1  | 0.00840032 | 2.90492971 | 0.048061956 | 9.1022923e-186 | 1.3543944e-275  | 0.018065804 |
| P62196 | Psmc5     | 26S proteasome regulatory subunit 8                                               | 759.97  | 40.39 | 45626  | 13 | 0.00841795 | 1.46347409 | 0.048066485 | 2.9280718e-185 | 6.9614611e-275  | 0.018067506 |
| Q6PGG2 | Gmip      | GEM-interacting protein                                                           | 94.61   | 1.03  | 107545 | 2  | 0.00847096 | 2.36276097 | 0.048187166 | 9.4056137e-185 | 3.571166e-274   | 0.018112868 |
| Q9D0R2 | Tars      | Threonine--tRNA ligase, cytoplasmic                                               | 1509.11 | 42.52 | 83356  | 27 | 0.00847284 | 2.04525472 | 0.048187166 | 3.0169414e-184 | 1.8247604e-273  | 0.018112868 |
| Q8BFQ8 | Gatd1     | Glutamine amidotransferase-like class 1 domain-containing protein 1               | 117.08  | 10.45 | 23277  | 2  | 0.0085287  | 2.29092412 | 0.048376425 | 9.663196e-184  | 9.3142059e-273  | 0.018184009 |
| Q62192 | Cd180     | CD180 antigen                                                                     | 200.21  | 6.96  | 74302  | 3  | 0.00855097 | 2.57665573 | 0.048376425 | 3.0906421e-183 | 4.7349216e-272  | 0.018184009 |
| P36876 | Ppp2r2a   | Serine/threonine-protein phosphatase 2A 55 kDa regulatory subunit B alpha isoform | 410.72  | 18.79 | 51678  | 8  | 0.00855695 | 1.87381665 | 0.048376425 | 9.8707583e-183 | 2.4017591e-271  | 0.018184009 |

|        |          |                                                                                   |         |       |        |    |            |            |             |                |                |             |
|--------|----------|-----------------------------------------------------------------------------------|---------|-------|--------|----|------------|------------|-------------|----------------|----------------|-------------|
| Q99MZ7 | Pecr     | Peroxisomal trans-2-enoyl-CoA reductase                                           | 118.11  | 7.92  | 32410  | 2  | 0.00861991 | 1.5637501  | 0.048636066 | 3.147937e-182  | 1.2167216e-270 | 0.018281604 |
| Q9Z255 | Ube2a    | Ubiquitin-conjugating enzyme E2 A                                                 | 52.41   | 6.58  | 17315  | 1  | 0.00865117 | 3.67761422 | 0.04868249  | 1.0024786e-181 | 6.1365649e-270 | 0.018299054 |
| Q62261 | Sptbn1   | Spectrin beta chain, non-erythrocytic 1                                           | 49.45   | 0.38  | 274223 | 1  | 0.00866224 | 2.99128282 | 0.04868249  | 3.1878477e-181 | 3.086747e-269  | 0.018299054 |
| Q91YR9 | Ptgr1    | Prostaglandin reductase 1                                                         | 402.74  | 27.36 | 35560  | 8  | 0.00868969 | 1.91291091 | 0.048725682 | 1.0122628e-180 | 1.5502529e-268 | 0.018315289 |
| Q9ERS2 | Ndufa13  | NADH dehydrogenase [ubiquinone] 1 alpha subcomplex subunit 13                     | 147.52  | 13.89 | 16860  | 3  | 0.00870406 | 0.77353867 | 0.048725682 | 3.2096826e-180 | 7.7667696e-268 | 0.018315289 |
| O89053 | Coro1a   | Coronin-1A                                                                        | 1683.42 | 52.93 | 50989  | 27 | 0.00873765 | 1.28930416 | 0.048817969 | 1.0162577e-179 | 3.8844221e-267 | 0.018349978 |
| Q64674 | Srm      | Spermidine synthase                                                               | 395.57  | 28.48 | 33995  | 7  | 0.0088168  | 1.90474247 | 0.049117396 | 3.2130563e-179 | 1.9373457e-266 | 0.018462529 |
| Q02356 | Ampd2    | AMP deaminase 2                                                                   | 86.4    | 2.43  | 94787  | 2  | 0.00882565 | 2.40834644 | 0.049117396 | 1.0143912e-178 | 9.6121093e-266 | 0.018462529 |
| P50518 | Atp6v1e1 | V-type proton ATPase subunit E 1                                                  | 463.81  | 41.59 | 26157  | 8  | 0.00890692 | 1.32786387 | 0.049473253 | 3.1979013e-178 | 4.762271e-265  | 0.018596291 |
| P35564 | Canx     | Calnexin                                                                          | 1249.29 | 39.09 | 67278  | 21 | 0.00902048 | 0.753786   | 0.05000675  | 1.0066927e-177 | 2.3470015e-264 | 0.018796824 |
| Q91YJ3 | Thyn1    | Thymocyte nuclear protein 1                                                       | 78.47   | 6.64  | 26178  | 2  | 0.00907211 | 2.50987416 | 0.050195477 | 3.1644698e-177 | 1.1486807e-263 | 0.018867764 |
| Q9CPV4 | Glod4    | Glyoxalase domain-containing protein 4                                            | 677.95  | 56.71 | 33317  | 16 | 0.00911942 | 2.00870778 | 0.050359663 | 9.93292e-177   | 5.6015309e-263 | 0.018929479 |
| Q91X52 | Dcxr     | L-xylulose reductase                                                              | 44.07   | 4.51  | 25746  | 1  | 0.0091447  | 1.92331926 | 0.050401793 | 3.113327e-176  | 2.7223294e-262 | 0.018945315 |
| Q505F5 | Lrrc47   | Leucine-rich repeat-containing protein 47                                         | 210.41  | 12.39 | 63590  | 5  | 0.00918532 | 1.7244512  | 0.050514305 | 9.7441551e-176 | 1.3200838e-261 | 0.018987607 |
| Q9EQH3 | Vps35    | Vacuolar protein sorting-associated protein 35                                    | 641.53  | 19.35 | 91713  | 10 | 0.00920537 | 1.93126834 | 0.050514305 | 3.0453353e-175 | 6.381879e-261  | 0.018987607 |
| Q3V1L4 | Nt5c2    | Cytosolic purine 5'-nucleotidase                                                  | 252.59  | 10.18 | 64809  | 5  | 0.0092182  | 2.43344306 | 0.050514305 | 9.5038018e-175 | 3.0792412e-260 | 0.018987607 |
| Q80UG5 | Sept9    | Septin-9                                                                          | 280.17  | 15.09 | 65575  | 6  | 0.0092532  | 1.77628273 | 0.050530854 | 2.9616298e-174 | 1.4833658e-259 | 0.018993827 |
| Q3TIR1 | Trappe13 | Trafficking protein particle complex subunit 13                                   | 96.87   | 8.87  | 46477  | 2  | 0.00925662 | 2.12968367 | 0.050530854 | 9.2158453e-174 | 7.1264209e-259 | 0.018993827 |
| Q76MZ3 | Ppp2r1a  | Serine/threonine-protein phosphatase 2A 65 kDa regulatory subunit A alpha isoform | 1267.77 | 41.77 | 65323  | 20 | 0.00934005 | 1.6280552  | 0.050889026 | 2.8635871e-173 | 3.419897e-258  | 0.019128459 |
| Q8VEE0 | Rpe      | Ribulose-phosphate 3-epimerase                                                    | 100.14  | 8.33  | 24945  | 1  | 0.00939415 | 3.62069489 | 0.051086271 | 8.8849761e-173 | 1.632731e-257  | 0.019202601 |
| P49138 | Mapkapk2 | MAP kinase-activated protein kinase 2                                             | 166.15  | 10.88 | 44050  | 4  | 0.00948927 | 1.83737216 | 0.051485898 | 2.7527871e-172 | 7.7666184e-257 | 0.019352815 |
| P11440 | Cdk1     | Cyclin-dependent kinase 1                                                         | 541.72  | 49.49 | 34107  | 12 | 0.0095037  | 2.17797979 | 0.051485898 | 8.5164638e-172 | 3.6735795e-256 | 0.019352815 |
| P26638 | Sars     | Serine--tRNA ligase, cytoplasmic                                                  | 726.71  | 29.69 | 58389  | 14 | 0.00955815 | 1.81522605 | 0.051609384 | 2.6309714e-171 | 1.7347398e-255 | 0.019399232 |
| P62869 | Elob     | Elongin-B                                                                         | 518.34  | 66.95 | 13170  | 10 | 0.00958745 | 2.1082206  | 0.051609384 | 8.1160168e-171 | 8.1622938e-255 | 0.019399232 |
| P22509 | Fbl      | rRNA 2'-O-methyltransferase fibrillarlin                                          | 918.82  | 58.1  | 34222  | 16 | 0.00958939 | 0.58978314 | 0.051609384 | 2.4999974e-170 | 3.8314595e-254 | 0.019399232 |
| Q99KQ4 | Nampt    | Nicotinamide phosphoribosyltransferase                                            | 468.5   | 22.81 | 55447  | 9  | 0.0095988  | 2.38541165 | 0.051609384 | 7.6896363e-170 | 1.7966857e-253 | 0.019399232 |
| Q53UA7 | Taok3    | Serine/threonine-protein kinase TAO3                                              | 164.73  | 5.01  | 105474 | 4  | 0.00966163 | 1.58426721 | 0.051849514 | 2.3617913e-169 | 8.4134964e-253 | 0.019489493 |
| P27612 | Plaa     | Phospholipase A-2-activating protein                                              | 554.38  | 17.76 | 87221  | 10 | 0.00971758 | 2.20197639 | 0.052051946 | 7.2434674e-169 | 3.9242014e-252 | 0.019565584 |
| Q61699 | Hsph1    | Heat shock protein 105 kDa                                                        | 570.99  | 15.27 | 96407  | 10 | 0.00975393 | 2.16231721 | 0.052148801 | 2.2183018e-168 | 1.8236868e-251 | 0.019601991 |
| Q9JK38 | Gnpat1   | Glucosamine 6-phosphate N-acetyltransferase                                       | 68.79   | 5.98  | 20791  | 1  | 0.00980558 | 4.51066399 | 0.052172983 | 6.7836541e-168 | 8.4525723e-251 | 0.01961108  |
| Q920A5 | Secep1   | Retinoid-inducible serine carboxypeptidase                                        | 331.76  | 19.03 | 50965  | 7  | 0.00983286 | 2.06660727 | 0.052172983 | 2.0714551e-167 | 3.9043972e-250 | 0.01961108  |
| Q9D8S9 | Bola1    | BoLA-like protein 1                                                               | 105.43  | 17.52 | 14379  | 3  | 0.00984486 | 2.54467908 | 0.052172983 | 6.316201e-167  | 1.7995081e-249 | 0.01961108  |
| P62702 | Rps4x    | 40S ribosomal protein S4, X isoform                                               | 1362.98 | 65.78 | 29598  | 24 | 0.00984977 | 1.43164007 | 0.052172983 | 1.9231129e-166 | 8.2814061e-249 | 0.01961108  |
| P51432 | Plcb3    | 1-phosphatidylinositol 4,5-bisphosphate phosphodiesterase beta-3                  | 298.04  | 7.46  | 139487 | 6  | 0.00984982 | 1.5697995  | 0.052172983 | 5.8468485e-166 | 3.8067127e-248 | 0.01961108  |
| P86182 | Ccdc22   | Coiled-coil domain-containing protein 22                                          | 83.65   | 4.31  | 70855  | 2  | 0.00990692 | 3.48111012 | 0.052326846 | 1.7750352e-165 | 1.7481979e-247 | 0.019668915 |
| Q8KZ24 | Ncapd2   | Condensin complex subunit 1                                                       | 266.42  | 6.03  | 155665 | 6  | 0.00993117 | 1.96535389 | 0.052326846 | 5.3809627e-165 | 7.9994203e-247 | 0.019668915 |
| Q9CQ08 | Lsm7     | U6 snRNA-associated Sm-like protein LSm7                                          | 97.25   | 15.53 | 11636  | 2  | 0.00994289 | 1.35739691 | 0.052326846 | 1.6288485e-164 | 3.6528212e-246 | 0.019668915 |
| Q62167 | Ddx3x    | ATP-dependent RNA helicase DDX3X                                                  | 1692.59 | 47.58 | 73101  | 27 | 0.00996668 | 1.35067254 | 0.052326846 | 4.923443e-164  | 1.6655415e-245 | 0.019668915 |
| P62317 | Snrpd2   | Small nuclear ribonucleoprotein Sm D2                                             | 359.22  | 52.54 | 13527  | 7  | 0.00997535 | 0.69937996 | 0.052326846 | 1.4860194e-163 | 7.5787085e-245 | 0.019668915 |
| O08739 | Ampd3    | AMP deaminase 3                                                                   | 42.12   | 0.91  | 88652  | 1  | 0.00998884 | 2.95916924 | 0.052326846 | 4.4786507e-163 | 3.4439263e-244 | 0.019668915 |
| Q8CAY6 | Acat2    | Acetyl-CoA acetyltransferase, cytosolic                                           | 363.97  | 27.46 | 41298  | 6  | 0.01001431 | 1.71912307 | 0.052364217 | 1.3478355e-162 | 1.5625491e-243 | 0.019682963 |
| Q04447 | Ckb      | Creatine kinase B-type                                                            | 1790.38 | 66.4  | 42713  | 25 | 0.01004071 | 1.76684578 | 0.052384653 | 4.0503577e-162 | 7.07447e-243   | 0.019690644 |
| Q9R1P4 | Psmal1   | Proteasome subunit alpha type-1                                                   | 707.76  | 64.64 | 29547  | 15 | 0.01005492 | 1.78298285 | 0.052384653 | 1.2153923e-161 | 3.1960788e-242 | 0.019690644 |
| P24155 | Thop1    | Thimet oligopeptidase                                                             | 192.1   | 5.53  | 78385  | 4  | 0.01012575 | 2.77871981 | 0.052657568 | 3.6417152e-161 | 1.4416144e-241 | 0.019793229 |
| Q8CI33 | Cwf1911  | CWF19-like protein 1                                                              | 80.37   | 5.4   | 60193  | 2  | 0.01021588 | 2.49364198 | 0.053029713 | 1.0895865e-160 | 6.4753618e-241 | 0.019933113 |
| Q8BGB7 | Enoph1   | Enolase-phosphatase E1                                                            | 71.49   | 5.45  | 28600  | 2  | 0.0102522  | 1.80695207 | 0.053121676 | 3.2552438e-160 | 2.8939762e-240 | 0.019967681 |
| Q9WUA2 | Farsb    | Phenylalanine--tRNA ligase beta subunit                                           | 563.32  | 21.9  | 65697  | 12 | 0.01028005 | 1.69248441 | 0.053169444 | 9.7111615e-160 | 1.2900571e-239 | 0.019985636 |
| Q64514 | Tpp2     | Tripeptidyl-peptidase 2                                                           | 987.35  | 24.25 | 139879 | 19 | 0.01032464 | 1.85295568 | 0.05323862  | 2.8928406e-159 | 5.7381782e-239 | 0.020011638 |
| Q9CRB9 | Chchd3   | MICOS complex subunit Mic19                                                       | 349.08  | 19.82 | 26335  | 6  | 0.01033072 | 0.69387607 | 0.05323862  | 8.6048505e-159 | 2.5448791e-238 | 0.020011638 |
| P60892 | Prps1    | Ribose-phosphate pyrophosphokinase 1                                              | 692     | 38.99 | 34834  | 14 | 0.01036453 | 1.60037607 | 0.053255295 | 2.5558034e-158 | 1.1272926e-237 | 0.020017906 |
| P54313 | Gmb2     | Guanine nucleotide-binding protein G(I)/G(S)/G(T) subunit beta-2                  | 1122.22 | 60.29 | 37331  | 16 | 0.01037126 | 0.71657762 | 0.053255295 | 7.5801302e-158 | 4.9813463e-237 | 0.020017906 |
| O88342 | Wdr1     | WD repeat-containing protein 1                                                    | 1345.48 | 49.83 | 66407  | 20 | 0.01039161 | 1.64264009 | 0.053263996 | 2.244868e-157  | 2.1984685e-236 | 0.020021177 |
| Q9QZE7 | Tsnax    | Translin-associated protein X                                                     | 278.92  | 21.03 | 32926  | 5  | 0.01048432 | 2.31386257 | 0.053631741 | 6.6384955e-157 | 9.684898e-236  | 0.020159407 |



|        |          |                                                                  |         |       |        |    |            |            |             |                |                |             |
|--------|----------|------------------------------------------------------------------|---------|-------|--------|----|------------|------------|-------------|----------------|----------------|-------------|
| Q63945 | Set      | Protein SET                                                      | 508.91  | 37.72 | 33406  | 9  | 0.01051679 | 1.59003892 | 0.053631741 | 1.9602572e-156 | 4.2451377e-235 | 0.020159407 |
| Q99JW2 | Acy1     | Aminoacylase-1                                                   | 645.02  | 33.09 | 45781  | 9  | 0.01051971 | 1.81407272 | 0.053631741 | 5.7799061e-156 | 1.8563772e-234 | 0.020159407 |
| Q8C7X2 | Emc1     | ER membrane protein complex subunit 1                            | 955.99  | 25.88 | 111605 | 17 | 0.01057493 | 0.70370891 | 0.053817157 | 1.7017379e-155 | 8.1092111e-234 | 0.020229102 |
| Q6P3D0 | Nudt16   | U8 snoRNA-decapping enzyme                                       | 115.72  | 11.79 | 21825  | 2  | 0.01061106 | 2.60849582 | 0.053829062 | 5.0029767e-155 | 3.5305506e-233 | 0.020233577 |
| P43275 | Hist1h1a | Histone H1.1                                                     | 511.19  | 36.15 | 21785  | 9  | 0.01061498 | 0.55716017 | 0.053829062 | 1.468683e-154  | 1.5332799e-232 | 0.020233577 |
| Q60591 | Nfatc2   | Nuclear factor of activated T-cells, cytoplasmic 2               | 230.88  | 9.39  | 100020 | 5  | 0.01070606 | 1.9257825  | 0.054194706 | 4.3051789e-154 | 6.651505e-232  | 0.020371017 |
| P0C0A2 | Vps36    | Vacuolar protein-sorting-associated protein 36                   | 173.53  | 11.14 | 43718  | 4  | 0.01082761 | 1.77229739 | 0.05470511  | 1.2601368e-153 | 2.8715441e-231 | 0.020562871 |
| P50247 | Ahecy    | Adenosylhomocysteinase                                           | 1277.03 | 48.15 | 47688  | 19 | 0.01084522 | 1.73920659 | 0.05470511  | 3.6830478e-153 | 1.2321596e-230 | 0.020562871 |
| P70248 | Myo1f    | Unconventional myosin-I f                                        | 294.48  | 6.01  | 125947 | 7  | 0.01087168 | 1.61892479 | 0.054741883 | 1.07488e-152   | 5.2782791e-230 | 0.020576693 |
| O70310 | Nmt1     | Glycylpeptide N-tetradecanoyltransferase 1                       | 726.13  | 33.47 | 56888  | 12 | 0.01090775 | 1.38588789 | 0.054826826 | 3.1323867e-152 | 2.2564751e-229 | 0.020608622 |
| Q63068 | Phax     | Phosphorylated adapter RNA export protein                        | 46.11   | 2.86  | 43166  | 1  | 0.01092966 | 2.19356808 | 0.054840406 | 9.11493e-152   | 9.6229556e-229 | 0.020613727 |
| P16409 | Myl3     | Myosin light chain 3                                             | 92.24   | 12    | 22156  | 2  | 0.0110027  | 2.18922783 | 0.055051224 | 2.6484615e-151 | 4.0962331e-228 | 0.02069297  |
| Q9CWX9 | Atic     | Bifunctional purine biosynthesis protein PURH                    | 2010.74 | 67.74 | 64217  | 32 | 0.01101045 | 1.7369973  | 0.055051224 | 7.6841555e-151 | 1.7367613e-227 | 0.02069297  |
| Q6MG61 | Clic1    | Chloride intracellular channel protein 1                         | 1265.48 | 61.41 | 26981  | 19 | 0.01102953 | 1.80366427 | 0.055051224 | 2.2261816e-150 | 7.3544804e-227 | 0.02069297  |
| Q80V11 | Trim56   | E3 ubiquitin-protein ligase TRIM56                               | 48.54   | 2.72  | 79513  | 1  | 0.01111466 | 3.63591993 | 0.055240427 | 6.4400139e-150 | 3.1089735e-226 | 0.020764089 |
| Q63413 | Ddx39b   | Spliceosome RNA helicase Ddx39b                                  | 1416.09 | 64.02 | 49035  | 24 | 0.0111231  | 1.31607707 | 0.055240427 | 1.8602639e-149 | 1.3084628e-225 | 0.020764089 |
| Q6DGG1 | Abhd14b  | Protein ABHD14B                                                  | 72.93   | 10    | 22618  | 2  | 0.01113292 | 3.51425695 | 0.055240427 | 5.3656665e-149 | 5.499857e-225  | 0.020764089 |
| Q99KP3 | Cry11    | Lambda-crystallin homolog                                        | 78.16   | 5.64  | 35209  | 1  | 0.01114483 | 3.57223015 | 0.055240427 | 1.5453752e-148 | 2.3086727e-224 | 0.020764089 |
| O80539 | Bin1     | Myc box-dependent-interacting protein 1                          | 257.22  | 14.12 | 64470  | 5  | 0.0111887  | 1.52600394 | 0.055269842 | 4.444318e-148  | 9.6773563e-224 | 0.020775145 |
| Q8VD75 | Hip1     | Huntingtin-interacting protein 1                                 | 62.6    | 1.65  | 115202 | 1  | 0.01118964 | 5.31449526 | 0.055269842 | 1.2762538e-147 | 4.0455018e-223 | 0.020775145 |
| O70551 | Srpk1    | SRSF protein kinase 1                                            | 288.67  | 11.27 | 73088  | 5  | 0.01120884 | 1.50903915 | 0.055269842 | 3.6595652e-147 | 1.6895253e-222 | 0.020775145 |
| P62137 | Ppp1ca   | Serine/threonine-protein phosphatase PP1-alpha catalytic subunit | 1025.09 | 49.09 | 37540  | 16 | 0.01138897 | 1.39964862 | 0.055968635 | 1.0478093e-146 | 7.0438924e-222 | 0.021037812 |
| Q5XIG8 | Strap    | Serine-threonine kinase receptor-associated protein              | 524.02  | 46.57 | 38456  | 8  | 0.01138976 | 2.26597335 | 0.055968635 | 2.995678e-146  | 2.9129222e-221 | 0.021037812 |
| P63280 | Ube2i    | SUMO-conjugating enzyme UBC9                                     | 275.56  | 27.85 | 18007  | 5  | 0.01147093 | 1.60569575 | 0.056270625 | 8.5520039e-146 | 1.2034459e-220 | 0.021151326 |
| Q62698 | Dync1li2 | Cytoplasmic dynein 1 light intermediate chain 2                  | 284.19  | 13.08 | 54745  | 5  | 0.01150579 | 1.6233118  | 0.056340074 | 2.4378127e-145 | 4.9514163e-220 | 0.02117743  |
| Q9QZL0 | Ripk3    | Receptor-interacting serine/threonine-protein kinase 3           | 73.14   | 5.76  | 53322  | 2  | 0.0115275  | 2.0604972  | 0.056340074 | 6.9389261e-145 | 2.0325191e-219 | 0.02117743  |
| O35303 | Dnm1l    | Dynamin-1-like protein                                           | 296.86  | 8.61  | 83908  | 6  | 0.01154429 | 2.30301187 | 0.056340074 | 1.9721659e-144 | 8.3284984e-219 | 0.02117743  |
| Q99M31 | Hspa14   | Heat shock 70 kDa protein 14                                     | 198.91  | 10.81 | 54650  | 4  | 0.01162644 | 2.12728439 | 0.056644155 | 5.5969789e-144 | 3.4072937e-218 | 0.02129173  |
| P01902 | H2-K1    | H-2 class I histocompatibility antigen, K-D alpha chain          | 430.13  | 23.1  | 41490  | 8  | 0.01165795 | 0.6008847  | 0.056700942 | 1.5860714e-143 | 1.3882379e-217 | 0.021313076 |
| Q8CGI1 | Fam193a  | Protein FAM193A                                                  | 37.06   | 0.81  | 136714 | 1  | 0.01169309 | 1.75439715 | 0.056717553 | 4.4879749e-143 | 5.6439869e-217 | 0.021319319 |
| Q8BFY9 | Tnpo1    | Transportin-1                                                    | 422.59  | 8.91  | 102357 | 8  | 0.0117011  | 2.14415203 | 0.056717553 | 1.2680504e-142 | 2.2893763e-216 | 0.021319319 |
| Q810B6 | Ankfy1   | Rabankyrin-5                                                     | 143.67  | 4.7   | 128653 | 4  | 0.01184922 | 1.72296151 | 0.057252893 | 3.5775093e-142 | 9.2749174e-216 | 0.021520546 |
| Q9WVQ5 | Apip     | Methylthioribulose-1-phosphate dehydratase                       | 149.19  | 15.35 | 26949  | 3  | 0.01185165 | 2.72759373 | 0.057252893 | 1.0078201e-141 | 3.7329467e-215 | 0.021520546 |
| Q80YW0 | Cyth4    | Cytohesin-4                                                      | 46.49   | 2.54  | 45285  | 1  | 0.01188443 | 2.69482828 | 0.057314266 | 2.8349343e-141 | 1.5008959e-214 | 0.021543615 |
| Q9CS42 | Prps2    | Ribose-phosphate pyrophosphokinase 2                             | 700.74  | 38.05 | 34786  | 13 | 0.0119677  | 1.62513729 | 0.057578943 | 7.9627031e-141 | 6.0215622e-214 | 0.021643104 |
| Q9CWP6 | Mospd2   | Motile sperm domain-containing protein 2                         | 103.84  | 3.47  | 59855  | 2  | 0.01197965 | 2.15775567 | 0.057578943 | 2.2332398e-140 | 2.4060763e-213 | 0.021643104 |
| O35381 | Anp32a   | Acidic leucine-rich nuclear phosphoprotein 32 family member A    | 353.18  | 21.86 | 28538  | 6  | 0.01200003 | 1.87634178 | 0.057579952 | 6.2541355e-140 | 9.6009253e-213 | 0.021643483 |
| P06801 | Me1      | NADP-dependent malic enzyme                                      | 94.39   | 3.15  | 63954  | 1  | 0.01210252 | 2.75799475 | 0.057974312 | 1.7488642e-139 | 3.8245799e-212 | 0.021791717 |
| P61082 | Ubc2m    | NEDD8-conjugating enzyme Ubc12                                   | 183.33  | 30.05 | 20900  | 4  | 0.01215121 | 1.88287122 | 0.058073898 | 4.8831665e-139 | 1.5163678e-211 | 0.02182915  |
| O35643 | Ap1b1    | AP-1 complex subunit beta-1                                      | 1039.42 | 27.47 | 103935 | 18 | 0.01216399 | 1.51999839 | 0.058073898 | 1.3614554e-138 | 5.9957892e-211 | 0.02182915  |
| P08030 | Aprt     | Adenine phosphoribosyltransferase                                | 923.16  | 78.89 | 19724  | 14 | 0.01227667 | 1.79366531 | 0.058420336 | 3.7901944e-138 | 2.3674581e-210 | 0.021959371 |
| Q3UMY5 | Eml4     | Echinoderm microtubule-associated protein-like 4                 | 105.37  | 3.64  | 110027 | 2  | 0.01230848 | 2.1701783  | 0.058420336 | 1.0535995e-137 | 9.3011191e-210 | 0.021959371 |
| Q9D0B6 | Pbdc1    | Protein PBDC1                                                    | 153.66  | 19.19 | 22223  | 3  | 0.01231399 | 2.24066499 | 0.058420336 | 2.9244578e-137 | 3.6465936e-209 | 0.021959371 |
| Q8C052 | Map1s    | Microtubule-associated protein 1S                                | 144.55  | 3.8   | 102939 | 3  | 0.0123184  | 2.17145469 | 0.058420336 | 8.1053298e-137 | 1.4280765e-208 | 0.021959371 |
| B3GNI6 | Septin11 | Septin-11                                                        | 380.63  | 20.88 | 49695  | 7  | 0.01239783 | 1.71428611 | 0.05869949  | 2.2431139e-136 | 5.5865504e-208 | 0.022064301 |
| D2XV59 | Gtpbp1   | GTP-binding protein 1                                            | 230.46  | 10.01 | 72489  | 5  | 0.0124351  | 2.29960298 | 0.058778476 | 6.1985061e-136 | 2.1771877e-207 | 0.022093991 |
| Q9JHW2 | Nit2     | Omega-amidase NIT2                                               | 523.68  | 35.87 | 30502  | 8  | 0.01248529 | 2.12730001 | 0.058826431 | 1.7103208e-135 | 8.4658036e-207 | 0.022112017 |
| Q9ZZU0 | PsmA7    | Proteasome subunit alpha type-7                                  | 682.84  | 53.23 | 27855  | 12 | 0.01248645 | 1.72260325 | 0.058826431 | 4.7121895e-135 | 3.2829464e-206 | 0.022112017 |
| Q9DB77 | Uqcrc2   | Cytochrome b-c1 complex subunit 2, mitochondrial                 | 1094.11 | 41.94 | 48235  | 17 | 0.0125106  | 0.79083924 | 0.058843091 | 1.2963501e-134 | 1.2718587e-205 | 0.022118279 |
| Q921M7 | Fam49b   | Protein FAM49B                                                   | 700.82  | 35.49 | 36776  | 11 | 0.01258085 | 1.75199264 | 0.059076173 | 3.561033e-134  | 4.9185797e-205 | 0.022205891 |
| Q9CQ65 | Mtap     | S-methyl-5'-thioadenosine phosphorylase                          | 475.25  | 35.34 | 31062  | 8  | 0.01263748 | 1.89542819 | 0.0591214   | 9.7675047e-134 | 1.8956734e-204 | 0.022222891 |
| Q9CQI7 | Snrpb2   | U2 small nuclear ribonucleoprotein B"                            | 332.89  | 31.11 | 25323  | 8  | 0.0126376  | 0.76960361 | 0.0591214   | 2.6751303e-133 | 7.2849052e-204 | 0.022222891 |



|        |          |                                                                        |         |       |        |    |            |            |             |                |                |             |
|--------|----------|------------------------------------------------------------------------|---------|-------|--------|----|------------|------------|-------------|----------------|----------------|-------------|
| A2BDX3 | Mocs3    | Adenylyltransferase and sulfurtransferase MOCS3                        | 100.13  | 5.65  | 49375  | 3  | 0.01267218 | 2.1948769  | 0.0591214   | 7.3157644e-133 | 2.7969146e-203 | 0.022222891 |
| O09131 | Gsto1    | Glutathione S-transferase omega-1                                      | 84.83   | 7.92  | 27498  | 2  | 0.01269984 | 2.35357993 | 0.0591214   | 1.9976882e-132 | 1.0715392e-202 | 0.022222891 |
| Q9CQ60 | Pgls     | 6-phosphogluconolactonase                                              | 786.36  | 87.16 | 27254  | 13 | 0.01270895 | 1.80419012 | 0.0591214   | 5.4468909e-132 | 4.0974723e-202 | 0.022222891 |
| Q62422 | Ostf1    | Osteoclast-stimulating factor 1                                        | 344.67  | 34.42 | 23783  | 6  | 0.01271472 | 1.73464214 | 0.0591214   | 1.482936e-131  | 1.5648851e-201 | 0.022222891 |
| Q8CGC7 | Eprs     | Bifunctional glutamate/proline--tRNA ligase                            | 2295.82 | 34.06 | 170079 | 37 | 0.01281153 | 1.31936742 | 0.059387366 | 4.0313327e-131 | 5.969755e-201  | 0.022322864 |
| O54988 | Slk      | STE20-like serine/threonine-protein kinase                             | 481.02  | 11.03 | 141457 | 9  | 0.01281353 | 1.69198294 | 0.059387366 | 1.0942767e-130 | 2.2676662e-200 | 0.022322864 |
| Q9CQA1 | Trappc5  | Trafficking protein particle complex subunit 5                         | 105.25  | 19.15 | 20795  | 3  | 0.0129727  | 2.36419548 | 0.059969281 | 2.9659083e-130 | 8.6053152e-200 | 0.022541598 |
| Q9ERF3 | Wdr61    | WD repeat-containing protein 61                                        | 97.8    | 12.46 | 33773  | 2  | 0.01298743 | 2.02274335 | 0.059969281 | 8.0267561e-130 | 3.2448913e-199 | 0.022541598 |
| P62908 | Rps3     | 40S ribosomal protein S3                                               | 1407.47 | 75.72 | 26674  | 25 | 0.01302561 | 1.61399595 | 0.059969281 | 2.169072e-129  | 1.2218402e-198 | 0.022541598 |
| Q8CDG3 | Vcpipl1  | Deubiquitinating protein VCIPI135                                      | 100.37  | 2.54  | 134503 | 3  | 0.01303077 | 2.44878301 | 0.059969281 | 5.8527396e-129 | 4.590575e-198  | 0.022541598 |
| Q91V12 | Acot7    | Cytosolic acyl coenzyme A thioester hydrolase                          | 406.28  | 29.66 | 42537  | 8  | 0.01304695 | 1.78420048 | 0.059969281 | 1.5768686e-128 | 1.7228221e-197 | 0.022541598 |
| O35626 | Rasd1    | Dexamethasone-induced Ras-related protein 1                            | 38.44   | 2.5   | 31684  | 1  | 0.01306511 | 2.8785153  | 0.059969281 | 4.2421169e-128 | 6.4561457e-197 | 0.022541598 |
| Q5SUF2 | Luc7l3   | Luc7-like protein 3                                                    | 482.02  | 21.76 | 51450  | 7  | 0.01311282 | 1.44890002 | 0.059990123 | 1.1395158e-127 | 2.4156654e-196 | 0.022549432 |
| Q9DCH4 | Eif3f    | Eukaryotic translation initiation factor 3 subunit F                   | 516.21  | 24.93 | 37984  | 8  | 0.01311286 | 1.48395965 | 0.059990123 | 3.0563876e-127 | 9.0157913e-196 | 0.022549432 |
| B5DF89 | Cul3     | Cullin-3                                                               | 174.39  | 9.51  | 88932  | 4  | 0.01313269 | 3.3102099  | 0.059990123 | 8.185526e-127  | 3.3617387e-195 | 0.022549432 |
| Q3UQ44 | Iqgap2   | Ras GTPase-activating-like protein IQGAP2                              | 100.96  | 1.14  | 180528 | 2  | 0.01327023 | 1.69969628 | 0.060521586 | 2.1889438e-126 | 1.2515006e-194 | 0.022749201 |
| Q9JHS3 | Lamtor2  | Ragulator complex protein LAMTOR2                                      | 72.28   | 8.8   | 13480  | 1  | 0.01336336 | 2.8526363  | 0.060849109 | 5.8448348e-126 | 4.6336513e-194 | 0.022872312 |
| P13020 | Gsn      | Gelsolin                                                               | 1715.16 | 48.85 | 85942  | 27 | 0.0133996  | 1.49176984 | 0.060916955 | 1.5583293e-125 | 1.7087984e-193 | 0.022897815 |
| P22907 | Hmbs     | Porphobilinogen deaminase                                              | 323.75  | 17.73 | 39344  | 4  | 0.01349903 | 2.04810459 | 0.061197206 | 4.1485404e-125 | 6.2884449e-193 | 0.023003157 |
| Q9Z2L0 | Vdac1    | Voltage-dependent anion-selective channel protein 1                    | 1355.54 | 78.09 | 30756  | 18 | 0.01350411 | 0.52250336 | 0.061197206 | 1.1027582e-124 | 2.3046167e-192 | 0.023003157 |
| P47758 | Srprb    | Signal recognition particle receptor subunit beta                      | 333.17  | 31.97 | 29579  | 6  | 0.01357665 | 0.74200775 | 0.061428405 | 2.9269402e-124 | 8.4368377e-192 | 0.023090061 |
| Q9CRC8 | Lrrc40   | Leucine-rich repeat-containing protein 40                              | 133.78  | 4.32  | 68076  | 2  | 0.0137397  | 2.19980219 | 0.062010948 | 7.7570355e-124 | 3.0785711e-191 | 0.023309031 |
| Q8K2T1 | Nmrall1  | NmrA-like family domain-containing protein 1                           | 111.05  | 7.77  | 34376  | 3  | 0.01374884 | 2.53752836 | 0.062010948 | 2.0527016e-123 | 1.1165359e-190 | 0.023309031 |
| Q63623 | Scaf8    | Protein SCAF8                                                          | 74.72   | 0.95  | 139504 | 1  | 0.01380737 | 2.08475404 | 0.062176709 | 5.4238005e-123 | 4.0445493e-190 | 0.023371338 |
| O08807 | Prdx4    | Peroxiredoxin-4                                                        | 450.91  | 46.72 | 31053  | 10 | 0.01395586 | 2.76811746 | 0.062746412 | 1.4309656e-122 | 1.4610634e-189 | 0.023585482 |
| P32067 | Ssb      | Lupus La protein homolog                                               | 849.81  | 33.49 | 47756  | 14 | 0.01404927 | 1.29962385 | 0.063067103 | 3.7696587e-122 | 5.248828e-189  | 0.023706025 |
| Q9CYI4 | Luc7l1   | Putative RNA-binding protein Luc7-like 1                               | 135.46  | 7.82  | 43934  | 3  | 0.01411179 | 1.65525478 | 0.063139667 | 9.9156677e-122 | 1.878484e-188  | 0.023733301 |
| Q9CWZ7 | Napg     | Gamma-soluble NSF attachment protein                                   | 48.97   | 4.17  | 34732  | 1  | 0.0141369  | 1.67937104 | 0.063139667 | 2.6042863e-121 | 6.7025967e-188 | 0.023733301 |
| P62715 | PPP2cb   | Serine/threonine-protein phosphatase 2A catalytic subunit beta isoform | 493.98  | 33.33 | 35575  | 9  | 0.01414021 | 1.85720761 | 0.063139667 | 6.8297069e-121 | 2.3879731e-187 | 0.023733301 |
| Q8BH43 | Wast2    | Wiskott-Aldrich syndrome protein family member 2                       | 243.43  | 10.66 | 54074  | 4  | 0.0141539  | 1.76279647 | 0.063139667 | 1.7883879e-120 | 8.4991136e-187 | 0.023733301 |
| P61087 | Ube2k    | Ubiquitin-conjugating enzyme E2 K                                      | 373.07  | 50.5  | 22407  | 7  | 0.01423391 | 1.91908424 | 0.06339617  | 4.6759241e-120 | 3.0209103e-186 | 0.023829716 |
| Q9CRA8 | Exosc5   | Exosome complex component RRP46                                        | 106.4   | 9.79  | 25194  | 2  | 0.01425812 | 0.01898853 | 0.06339617  | 1.2207282e-119 | 1.0701663e-185 | 0.023829716 |
| P51859 | Hdgf     | Hepatoma-derived growth factor                                         | 430.74  | 49.37 | 26269  | 8  | 0.01427802 | 1.53840245 | 0.06339617  | 3.1821162e-119 | 3.7848512e-185 | 0.023829716 |
| P70315 | Was      | Wiskott-Aldrich syndrome protein homolog                               | 155.03  | 13.08 | 54192  | 3  | 0.01430815 | 2.08118404 | 0.063431327 | 8.2824414e-119 | 1.3365552e-184 | 0.023842931 |
| P62814 | Atp6v1b2 | V-type proton ATPase subunit B, brain isoform                          | 1654.45 | 68.3  | 56551  | 27 | 0.01434257 | 1.42240882 | 0.063485345 | 2.1525127e-118 | 4.7112098e-184 | 0.023863236 |
| Q3UBX0 | Tmem109  | Transmembrane protein 109                                              | 111.18  | 11.52 | 26306  | 2  | 0.01440528 | 4.00209197 | 0.063664207 | 5.5857029e-118 | 1.657413e-183  | 0.023930468 |
| Q9D7X3 | Dusp3    | Dual specificity protein phosphatase 3                                 | 600.66  | 59.46 | 20472  | 10 | 0.01453617 | 1.65690639 | 0.064143373 | 1.4472862e-117 | 5.8145781e-183 | 0.024110579 |
| Q78JE5 | Fbxo22   | F-box only protein 22                                                  | 41.06   | 2.24  | 44203  | 1  | 0.01466115 | 2.37868568 | 0.06459504  | 3.7443397e-117 | 2.0301479e-182 | 0.024280354 |
| Q7TMB8 | Cyfp1    | Cytoplasmic FMR1-interacting protein 1                                 | 787.81  | 14.84 | 145241 | 17 | 0.01471263 | 1.25091146 | 0.064719565 | 9.6725286e-117 | 7.0558947e-182 | 0.024327162 |
| O35095 | Ncdn     | Neurochondrin                                                          | 96.84   | 4.39  | 78923  | 2  | 0.01474375 | 2.815497   | 0.064719565 | 2.4948733e-116 | 2.4464161e-181 | 0.024327162 |
| P70202 | Lxn      | Latexin                                                                | 127.05  | 9.46  | 25492  | 2  | 0.01476893 | 2.08135036 | 0.064719565 | 6.4254031e-116 | 8.4668237e-181 | 0.024327162 |
| P59325 | Eif5     | Eukaryotic translation initiation factor 5                             | 385.12  | 19.35 | 48968  | 8  | 0.01478009 | 1.78224297 | 0.064719565 | 1.6523248e-115 | 2.9254839e-180 | 0.024327162 |
| Q8WTY4 | Ciapin1  | Anamorsin                                                              | 240.31  | 22.33 | 33429  | 5  | 0.01484267 | 1.65625376 | 0.064894076 | 4.2426123e-115 | 1.0095721e-179 | 0.024392758 |
| P61759 | Vbp1     | Prefoldin subunit 3                                                    | 245.47  | 32.14 | 22436  | 5  | 0.01488227 | 3.02429811 | 0.064967699 | 1.0877119e-114 | 3.4745506e-179 | 0.024420432 |
| Q8K0C9 | Gmns     | GDP-mannose 4,6 dehydratase                                            | 127.7   | 6.72  | 41985  | 2  | 0.01490694 | 3.41357701 | 0.06497606  | 2.784433e-114  | 1.1933568e-178 | 0.024423575 |
| Q8BQM4 | Heatr3   | HEAT repeat-containing protein 3                                       | 196.51  | 7.22  | 74305  | 4  | 0.01497644 | 2.42281052 | 0.065055731 | 7.1170779e-114 | 4.0920228e-178 | 0.024453522 |
| Q9D662 | Sec23b   | Protein transport protein Sec23B                                       | 697.68  | 21.51 | 86437  | 11 | 0.01500205 | 1.52518487 | 0.065055731 | 1.8163874e-113 | 1.3991063e-177 | 0.024453522 |
| Q9Z0P5 | Twf2     | Twinfilin-2                                                            | 386.7   | 32.95 | 39471  | 7  | 0.01501042 | 1.79281608 | 0.065055731 | 4.6286756e-113 | 4.7758468e-177 | 0.024453522 |
| P61965 | Wdr5     | WD repeat-containing protein 5                                         | 83.17   | 4.19  | 36588  | 1  | 0.01504891 | 2.75348509 | 0.065055731 | 1.1777314e-112 | 1.6283514e-176 | 0.024453522 |
| P97855 | G3bp1    | Ras GTPase-activating protein-binding protein 1                        | 810.68  | 40.22 | 51829  | 15 | 0.01504985 | 1.63027786 | 0.065055731 | 2.9921045e-112 | 5.5408406e-176 | 0.024453522 |
| P51807 | Dynl1    | Dynein light chain Tctex-type 1                                        | 61.35   | 15.93 | 12483  | 1  | 0.01506194 | 17.7155665 | 0.065055731 | 7.5901078e-112 | 1.8836109e-175 | 0.024453522 |
| Q3UH60 | Dip2b    | Disco-interacting protein 2 homolog B                                  | 317.4   | 5.84  | 171126 | 6  | 0.01511714 | 1.79147728 | 0.065195541 | 1.9224699e-111 | 6.3952576e-175 | 0.024506074 |
| Q8CAQ8 | Immt     | MICOS complex subunit Mic60                                            | 1617.9  | 46.24 | 83900  | 26 | 0.01519396 | 0.68102017 | 0.065427986 | 4.8619591e-111 | 2.1659728e-174 | 0.024593447 |
| Q80UM3 | Naa15    | N-alpha-acetyltransferase 15, NatA auxiliary subunit                   | 438.56  | 14.1  | 100961 | 9  | 0.0152971  | 2.01687204 | 0.065772931 | 1.2277301e-110 | 7.3133948e-174 | 0.024723107 |

|        |          |                                                                                    |         |       |        |    |            |            |             |                |                |             |
|--------|----------|------------------------------------------------------------------------------------|---------|-------|--------|----|------------|------------|-------------|----------------|----------------|-------------|
| Q8BWU5 | Osgep    | Probable tRNA N6-adenosine<br>threonylcarbamoyltransferase                         | 75.9    | 8.66  | 36301  | 2  | 0.01533964 | 2.81509265 | 0.065856669 | 3.0955234e-110 | 2.4600702e-173 | 0.024754583 |
| Q9D7H3 | RtcA     | RNA 3'-terminal phosphate cyclase                                                  | 185.8   | 12.02 | 39254  | 3  | 0.01548305 | 2.06913062 | 0.066372533 | 7.7929981e-110 | 8.2578801e-173 | 0.024948489 |
| Q922Q8 | Lrrc59   | Leucine-rich repeat-containing protein 59                                          | 315.59  | 36.81 | 34877  | 7  | 0.01555039 | 1.54062892 | 0.06650003  | 1.9589081e-109 | 2.7586221e-172 | 0.024996413 |
| Q8R4Y8 | Rttm     | Rotatin                                                                            | 42.11   | 0.31  | 248489 | 1  | 0.01557504 | 2.07710133 | 0.06650003  | 4.9165708e-109 | 9.1902324e-172 | 0.024996413 |
| P49186 | Mapk9    | Mitogen-activated protein kinase 9                                                 | 110.91  | 4.96  | 48017  | 2  | 0.01559938 | 3.311814   | 0.06650003  | 1.2321085e-108 | 3.0568497e-171 | 0.024996413 |
| P59017 | Bcl2l13  | Bcl-2-like protein 13                                                              | 41.92   | 6.45  | 46719  | 1  | 0.01560829 | 0.26098947 | 0.06650003  | 3.083002e-108  | 1.01517e-170   | 0.024996413 |
| Q99KB8 | Hagh     | Hydroxyacylglutathione hydrolase, mitochondrial                                    | 132.61  | 21.36 | 34084  | 4  | 0.01562925 | 1.98663672 | 0.06650003  | 7.7025855e-108 | 3.3674421e-170 | 0.024996413 |
| Q3UDE2 | Ttl12    | Tubulin--tyrosine ligase-like protein 12                                           | 345.5   | 12.36 | 74043  | 7  | 0.01576317 | 1.64064067 | 0.066970032 | 1.9214843e-107 | 1.1153663e-169 | 0.02517308  |
| P07742 | Rrm1     | Ribonucleoside-diphosphate reductase large subunit                                 | 373.05  | 14.02 | 90210  | 7  | 0.01578926 | 1.60914388 | 0.066981198 | 4.7860193e-107 | 3.6777868e-169 | 0.025177277 |
| Q9Z2U1 | Psma5    | Proteasome subunit alpha type-5                                                    | 578.05  | 47.72 | 26411  | 8  | 0.01583882 | 1.58711045 | 0.067091749 | 1.1902798e-106 | 1.2107561e-168 | 0.025218832 |
| B2RXC1 | Trappc11 | Trafficking protein particle complex subunit 11                                    | 47.95   | 0.79  | 128396 | 1  | 0.01586301 | 3.31444746 | 0.067094677 | 2.9557005e-106 | 3.9770375e-168 | 0.025219932 |
| P97822 | Anp32c   | Acidic leucine-rich nuclear phosphoprotein 32<br>family member E                   | 248.96  | 17.69 | 29622  | 4  | 0.01591827 | 2.07585116 | 0.067190838 | 7.3283837e-106 | 1.304328e-167  | 0.025256078 |
| P31230 | Aimp1    | Aminoacyl tRNA synthase complex-interacting<br>multifunctional protein 1           | 401.65  | 45.16 | 33997  | 8  | 0.01594302 | 1.44267214 | 0.067190838 | 1.8142291e-105 | 4.2676153e-167 | 0.025256078 |
| Q9QZB7 | Actr10   | Actin-related protein 10                                                           | 165.92  | 7.43  | 46208  | 2  | 0.01595635 | 2.37493996 | 0.067190838 | 4.484478e-105  | 1.3941285e-166 | 0.025256078 |
| P97930 | Dtymk    | Thymidylate kinase                                                                 | 129.43  | 16.04 | 23915  | 3  | 0.01606885 | 2.83954051 | 0.067564914 | 1.1067951e-104 | 4.5485057e-166 | 0.025396688 |
| P04692 | Tpm1     | Tropomyosin alpha-1 chain                                                          | 379.17  | 16.9  | 32681  | 7  | 0.01614003 | 2.10337603 | 0.067764402 | 2.7274564e-104 | 1.4783149e-165 | 0.025471673 |
| D3ZYR1 | Fcho2    | F-BAR domain only protein 2                                                        | 49.33   | 2.97  | 88712  | 1  | 0.01619426 | 4.95990748 | 0.067852396 | 6.7109401e-104 | 4.7914721e-165 | 0.025504748 |
| Q8V175 | Ipo4     | Importin-4                                                                         | 163.73  | 3.51  | 119275 | 4  | 0.01621602 | 2.16938646 | 0.067852396 | 1.6487074e-103 | 1.5494145e-164 | 0.025504748 |
| Q8R180 | Ero1a    | ERO1-like protein alpha                                                            | 441.46  | 17.89 | 54084  | 8  | 0.01623229 | 2.30877581 | 0.067852396 | 4.0442518e-103 | 5.002936e-164  | 0.025504748 |
| Q9J116 | Akr1a1   | Alcohol dehydrogenase [NADP(+)]                                                    | 505.73  | 30.15 | 36587  | 10 | 0.0162974  | 1.88505218 | 0.06802498  | 9.9052823e-103 | 1.6132499e-163 | 0.02556962  |
| P97825 | Jpt1     | Jupiter microtubule associated homolog 1                                           | 120.6   | 27.27 | 16081  | 2  | 0.01641496 | 2.64054647 | 0.06841565  | 2.4223077e-102 | 5.1887035e-163 | 0.025716467 |
| P32233 | Drg1     | Developmentally-regulated GTP-binding protein 1                                    | 303.57  | 16.08 | 40512  | 5  | 0.01646357 | 1.73057007 | 0.068473111 | 5.9145979e-102 | 1.662367e-162  | 0.025738066 |
| Q91VU7 | Pus7     | Pseudouridylylate synthase 7 homolog                                               | 118.04  | 6.52  | 74793  | 3  | 0.01647672 | 2.5797643  | 0.068473111 | 1.4419637e-101 | 5.3145417e-162 | 0.025738066 |
| Q91Z53 | Grhpr    | Glyoxylate reductase/hydroxypyruvate reductase                                     | 235.94  | 19.51 | 35329  | 5  | 0.01651384 | 2.08089378 | 0.068527618 | 3.5100741e-101 | 1.6969225e-161 | 0.025758555 |
| Q01405 | Sec23a   | Protein transport protein Sec23A                                                   | 220.37  | 8.89  | 86162  | 4  | 0.01665716 | 2.37215928 | 0.069022036 | 8.5312137e-101 | 5.4082328e-161 | 0.025944399 |
| O70593 | Sgta     | Small glutamine-rich tetratricopeptide repeat-<br>containing protein alpha         | 316.14  | 23.89 | 34157  | 6  | 0.01669315 | 1.72117893 | 0.069070947 | 2.0703207e-100 | 1.7159509e-160 | 0.025962784 |
| Q91VZ6 | Smap1    | Stromal membrane-associated protein 1                                              | 106.19  | 5.68  | 47660  | 2  | 0.01675411 | 2.68311641 | 0.06922286  | 5.0164488e-100 | 5.4346311e-160 | 0.026019886 |
| Q9ET30 | Tm9s3    | Transmembrane 9 superfamily member 3                                               | 116.02  | 8.18  | 67545  | 3  | 0.01679848 | 0.5987049  | 0.069305854 | 1.2136314e-99  | 1.7170625e-159 | 0.026051082 |
| Q8R5A3 | Apbb1ip  | Amyloid beta A4 precursor protein-binding family<br>B member 1-interacting protein | 68.3    | 5.07  | 74319  | 2  | 0.0168605  | 4.2251539  | 0.069461372 | 2.931626e-99   | 5.4141704e-159 | 0.026109539 |
| Q9JK81 | Myg1     | UPF0160 protein MYG1, mitochondrial                                                | 436.13  | 21.32 | 42723  | 7  | 0.01689453 | 1.79718193 | 0.069501278 | 7.0706829e-99  | 1.7030311e-158 | 0.026124539 |
| Q8BVY0 | Rsl1d1   | Ribosomal L1 domain-containing protein 1                                           | 1118.56 | 40.71 | 50421  | 14 | 0.0170327  | 0.61137556 | 0.069907069 | 1.7027265e-98  | 5.3475574e-158 | 0.02627707  |
| Q9CZ13 | Uqcr1    | Cytochrome b-c1 complex subunit 1, mitochondrial                                   | 686.76  | 36.88 | 52852  | 12 | 0.01704214 | 0.7084771  | 0.069907069 | 4.0941037e-98  | 1.6720236e-157 | 0.02627707  |
| P80316 | Cct5     | T-complex protein 1 subunit epsilon                                                | 1538.34 | 51.2  | 59624  | 25 | 0.01708744 | 1.62515589 | 0.069992303 | 9.8288545e-98  | 5.2219518e-157 | 0.026309109 |
| Q8BVI4 | Qdpr     | Dihydropteridine reductase                                                         | 199.9   | 26.56 | 25570  | 4  | 0.01711479 | 1.78978448 | 0.070003925 | 2.356008e-97   | 1.6276232e-156 | 0.026313477 |
| Q62523 | Zyx      | Zyxin                                                                              | 398.79  | 21.99 | 60546  | 9  | 0.01714292 | 1.28669386 | 0.07000678  | 5.6387146e-97  | 5.065151e-156  | 0.02631455  |
| Q6NSR8 | Npepl1   | Probable aminopeptidase NPEPL1                                                     | 286.72  | 11.83 | 55940  | 5  | 0.01716453 | 2.30134053 | 0.07000678  | 1.3474499e-96  | 1.5737681e-155 | 0.02631455  |
| P42227 | Stat3    | Signal transducer and activator of transcription 3                                 | 81.04   | 4.16  | 88054  | 2  | 0.01731568 | 1.95512811 | 0.070522493 | 3.2149484e-96  | 4.8827678e-155 | 0.0265084   |
| Q4AE70 | Carm1    | Histone-arginine methyltransferase CARM1                                           | 184.16  | 9.06  | 70341  | 3  | 0.0174296  | 2.37955005 | 0.070819142 | 7.6588563e-96  | 1.5081437e-154 | 0.026619906 |
| P58404 | Strn4    | Striatin-4                                                                         | 56.34   | 2.24  | 81645  | 1  | 0.01747234 | 3.38516958 | 0.070819142 | 1.8217218e-95  | 4.6415573e-154 | 0.026619906 |
| P04256 | Hnrnpa1  | Heterogeneous nuclear ribonucleoprotein A1                                         | 1476.03 | 55.31 | 34212  | 21 | 0.01747623 | 0.68097114 | 0.070819142 | 4.3264143e-95  | 1.425789e-153  | 0.026619906 |
| Q05816 | Fabp5    | Fatty acid-binding protein 5                                                       | 1148.5  | 80    | 15137  | 16 | 0.01748774 | 1.8161267  | 0.070819142 | 1.0258922e-94  | 4.3753151e-153 | 0.026619906 |
| O35142 | Copb2    | Coatomer subunit beta'                                                             | 807.7   | 26.52 | 102551 | 15 | 0.0175581  | 1.68256182 | 0.070919966 | 2.4288609e-94  | 1.3410607e-152 | 0.026657804 |
| Q5XJY5 | Arcn1    | Coatomer subunit delta                                                             | 892.83  | 36.01 | 57229  | 18 | 0.01758785 | 1.57170575 | 0.070919966 | 5.7415678e-94  | 4.0999826e-152 | 0.026657804 |
| B0BN18 | Pfdn2    | Prefoldin subunit 2 2                                                              | 174.48  | 22.73 | 16580  | 3  | 0.01759836 | 1.68329694 | 0.070919966 | 1.3551425e-93  | 1.2514649e-151 | 0.026657804 |
| Q9QUM9 | Psma6    | Proteasome subunit alpha type-6                                                    | 783.67  | 64.63 | 27372  | 13 | 0.017612   | 1.71649876 | 0.070919966 | 3.1934915e-93  | 3.8154894e-151 | 0.026657804 |
| P0C5H9 | Manf     | Mesencephalic astrocyte-derived neurotrophic<br>factor                             | 36.47   | 7.82  | 20388  | 1  | 0.0176572  | 2.83733187 | 0.071001853 | 7.514023e-93   | 1.1618362e-150 | 0.026688584 |
| O70469 | Dok2     | Docking protein 2                                                                  | 161.91  | 9.22  | 45522  | 3  | 0.01768273 | 2.38547934 | 0.071004506 | 1.7652448e-92  | 3.5309285e-150 | 0.026689581 |
| Q499W2 | Gins4    | DNA replication complex GINS protein SLD5                                          | 80.44   | 12.56 | 26062  | 2  | 0.01776032 | 2.10674748 | 0.071215897 | 4.1405943e-92  | 1.0714653e-149 | 0.02676904  |
| Q9D8M4 | Rpl7l1   | 60S ribosomal protein L7-like 1                                                    | 216.52  | 19.92 | 28544  | 5  | 0.01788276 | 0.73673265 | 0.071379697 | 9.6971795e-92  | 3.2426472e-149 | 0.02683061  |
| Q5U216 | Ddx39a   | ATP-dependent RNA helicase DDX39A =2                                               | 1069.77 | 50.12 | 49109  | 19 | 0.01788501 | 1.41957818 | 0.071379697 | 2.267529e-91   | 9.7773239e-149 | 0.02683061  |
| Q6AYE2 | Sh3glb1  | Endophilin-B1 E=2                                                                  | 109.03  | 6.85  | 40787  | 2  | 0.01789076 | 2.15063206 | 0.071379697 | 5.2940084e-91  | 2.9452168e-148 | 0.02683061  |
| Q62433 | Ndrgl1   | Protein NDRG1                                                                      | 343.89  | 26.14 | 43009  | 5  | 0.01790118 | 1.61292006 | 0.071379697 | 1.2340718e-90  | 8.862502e-148  | 0.02683061  |

|        |          |                                                               |         |       |        |    |            |            |             |               |                |             |
|--------|----------|---------------------------------------------------------------|---------|-------|--------|----|------------|------------|-------------|---------------|----------------|-------------|
| P35738 | Bckdhh   | 2-oxoisovalerate dehydrogenase subunit beta, mitochondrial    | 69.84   | 2.82  | 42823  | 1  | 0.01796007 | 3.43924875 | 0.071514639 | 2.8722344e-90 | 2.6637343e-147 | 0.026881333 |
| Q9JHK5 | Plek     | Pleckstrin                                                    | 545.19  | 45.14 | 39901  | 10 | 0.01812704 | 1.30661118 | 0.072047498 | 6.6745611e-90 | 7.9882286e-147 | 0.027081627 |
| Q6NVF9 | Cpsf6    | Cleavage and polyadenylation specificity factor subunit 6     | 512.74  | 19.06 | 59153  | 8  | 0.01814436 | 1.3106189  | 0.072047498 | 1.5486332e-89 | 2.3845102e-146 | 0.027081627 |
| P12382 | Pfkf     | ATP-dependent 6-phosphofructokinase, liver type               | 754.16  | 21.67 | 85360  | 13 | 0.01824917 | 1.58802836 | 0.072343258 | 3.5875428e-89 | 7.1085361e-146 | 0.027192799 |
| Q91YL3 | Uckl1    | Uridine-cytidine kinase-like 1                                | 82.25   | 3.28  | 60842  | 2  | 0.01830968 | 3.20306105 | 0.072343258 | 8.2978958e-89 | 2.1123226e-145 | 0.027192799 |
| Q8BQ30 | Ppp1r18  | Phostensin                                                    | 268.35  | 10.94 | 65630  | 6  | 0.01832528 | 1.4168226  | 0.072343258 | 1.9162884e-88 | 6.2627546e-145 | 0.027192799 |
| Q9WTM5 | Ruvb12   | RuvB-like 2                                                   | 874.24  | 33.26 | 51113  | 15 | 0.01833478 | 1.19119116 | 0.072343258 | 4.4185061e-88 | 1.8544769e-144 | 0.027192799 |
| P18654 | Rps6ka3  | Ribosomal protein S6 kinase alpha-3                           | 78.01   | 2.57  | 83694  | 2  | 0.01834554 | 2.08062546 | 0.072343258 | 1.0172118e-87 | 5.4851089e-144 | 0.027192799 |
| P63168 | Dynll1   | Dynein light chain 1, cytoplasmic                             | 36.26   | 12.36 | 10366  | 1  | 0.01837709 | 1.93827159 | 0.072367718 | 2.3381281e-87 | 1.6204824e-143 | 0.027201993 |
| Q9EPU0 | Upf1     | Regulator of nonsense transcripts 1                           | 1036.76 | 19.4  | 123967 | 21 | 0.01842643 | 1.57547892 | 0.072462056 | 5.365941e-87  | 4.7797219e-143 | 0.027237453 |
| Q99K85 | Psat1    | Phosphoserine aminotransferase                                | 1514.64 | 60.27 | 40473  | 25 | 0.01850544 | 1.8170888  | 0.072672654 | 1.2295432e-86 | 1.4070002e-142 | 0.027316614 |
| P61222 | Abce1    | ATP-binding cassette sub-family E member 1                    | 1040.79 | 34.89 | 67314  | 16 | 0.01855876 | 1.79291047 | 0.07272013  | 2.8129479e-86 | 4.1308961e-142 | 0.02733446  |
| Q9JLT4 | Txnr2    | Thioredoxin reductase 2, mitochondrial                        | 176.76  | 5.15  | 56603  | 2  | 0.01858993 | 1.47283462 | 0.07272013  | 6.4253858e-86 | 1.2103054e-141 | 0.02733446  |
| P47226 | Tesn     | Testin                                                        | 271.22  | 15.13 | 47983  | 5  | 0.01859394 | 1.57367213 | 0.07272013  | 1.4653994e-85 | 3.5404026e-141 | 0.02733446  |
| P28063 | Psmb8    | Proteasome subunit beta type-8                                | 602.14  | 42.39 | 30260  | 10 | 0.01865922 | 1.46406553 | 0.072875624 | 3.3368123e-85 | 1.0345893e-140 | 0.027392908 |
| Q5U2R0 | Mat2b    | Methionine adenosyltransferase 2 subunit beta                 | 152.24  | 9.58  | 37375  | 3  | 0.01868739 | 1.6369411  | 0.072885938 | 7.5862323e-85 | 3.0163113e-140 | 0.027396785 |
| P17751 | Tpi1     | Triosephosphate isomerase                                     | 1513.19 | 74.25 | 32192  | 21 | 0.01885117 | 1.73955611 | 0.0734244   | 1.7220222e-84 | 8.7805108e-140 | 0.027599185 |
| Q6NZQ2 | Ddx31    | Probable ATP-dependent RNA helicase DDX31                     | 67.29   | 1.89  | 76913  | 1  | 0.01890878 | 2.57001832 | 0.073489454 | 3.9027367e-84 | 2.5448607e-139 | 0.027623638 |
| Q3UMB9 | Washc4   | WASH complex subunit 4                                        | 106.43  | 1.11  | 136370 | 2  | 0.01893298 | 2.79761354 | 0.073489454 | 8.8311512e-84 | 7.3600688e-139 | 0.027623638 |
| Q8CG45 | Akr7a2   | Aflatoxin B1 aldehyde reductase member 2                      | 74.93   | 4.09  | 40675  | 1  | 0.01894509 | 1.97274119 | 0.073489454 | 1.9951823e-83 | 2.1255752e-138 | 0.027623638 |
| Q99K01 | Pdxdc1   | Pyridoxal-dependent decarboxylase domain-containing protein 1 | 76.39   | 2.8   | 87335  | 2  | 0.01900477 | 2.46196601 | 0.073620922 | 4.5005409e-83 | 6.1313539e-138 | 0.027673055 |
| Q9D019 | Rars     | Arginine--tRNA ligase, cytoplasmic                            | 1329.99 | 40    | 75674  | 23 | 0.01906184 | 1.65611646 | 0.073741948 | 1.0135924e-82 | 1.764794e-137  | 0.027718547 |
| Q8CBW3 | Abi1     | Abl interactor 1                                              | 99.73   | 6.44  | 52288  | 2  | 0.01912784 | 1.9328449  | 0.073897136 | 2.2791772e-82 | 5.0689132e-137 | 0.02777688  |
| Q641Z4 | Cdk9     | Cyclin-dependent kinase 9                                     | 87.05   | 6.45  | 42762  | 2  | 0.01915403 | 2.05429533 | 0.073898315 | 5.1169202e-82 | 1.4525849e-136 | 0.027777323 |
| P63036 | Dnaj1    | DnaJ homolog subfamily A member 1                             | 276.26  | 19.9  | 44868  | 6  | 0.01917993 | 2.03156081 | 0.07389839  | 1.1469768e-81 | 4.1565151e-136 | 0.027777351 |
| Q6IRU2 | Tpm4     | Tropomyosin alpha-4 chain                                     | 814.48  | 43.15 | 28468  | 12 | 0.01924349 | 1.73930885 | 0.074043347 | 2.5669399e-81 | 1.187629e-135  | 0.027831838 |
| Q9DAR7 | Dcps     | m7GpppX diphosphatase                                         | 448.69  | 35.5  | 38988  | 9  | 0.01939035 | 2.11271681 | 0.074412533 | 5.7357667e-81 | 3.3858196e-135 | 0.02797061  |
| Q8COM9 | Asrg1    | Isoaspartyl peptidase/L-asparaginase                          | 169.81  | 11.04 | 33950  | 3  | 0.01939157 | 2.22358014 | 0.074412533 | 1.2796218e-80 | 9.6150605e-135 | 0.02797061  |
| Q80X80 | C2cd2l   | Phospholipid transfer protein C2CD2L                          | 53.79   | 1.42  | 76329  | 1  | 0.01959963 | 2.91523395 | 0.075109991 | 2.8502684e-80 | 2.7278687e-134 | 0.028232774 |
| P49615 | Cdk5     | Cyclin-dependent-like kinase 5                                | 85.69   | 5.14  | 33288  | 2  | 0.01967977 | 2.36344889 | 0.075315724 | 6.3387487e-80 | 7.6998927e-134 | 0.028310107 |
| Q8R2E9 | Ero1b    | ERO1-like protein beta                                        | 223.18  | 8.99  | 53518  | 4  | 0.0198256  | 2.31144143 | 0.075735327 | 1.4074552e-79 | 2.16797e-133   | 0.028467829 |
| Q61881 | Mcm7     | DNA replication licensing factor MCM7                         | 972.8   | 33.52 | 81211  | 19 | 0.01984239 | 1.21701331 | 0.075735327 | 3.1201721e-79 | 6.0809622e-133 | 0.028467829 |
| P67778 | Phb      | Prohibitin                                                    | 1327.9  | 83.46 | 29820  | 20 | 0.01994326 | 0.71137331 | 0.076018701 | 6.906135e-79  | 1.7035152e-132 | 0.028574346 |
| Q4KML4 | Abrac1   | Costars family protein ABRACL                                 | 312.09  | 51.85 | 9030   | 6  | 0.01998875 | 1.83959725 | 0.076090509 | 1.5261729e-78 | 4.7584231e-132 | 0.028601338 |
| Q91YX0 | Themis2  | Protein THEMIS2                                               | 143.98  | 4.52  | 74378  | 2  | 0.02007359 | 1.96081155 | 0.07617388  | 3.367319e-78  | 1.3267659e-131 | 0.028632675 |
| Q9DBR7 | Ppp1r12a | Protein phosphatase 1 regulatory subunit 12A                  | 49.74   | 0.97  | 114996 | 1  | 0.02007472 | 2.08558385 | 0.07617388  | 7.4178185e-78 | 3.6898726e-131 | 0.028632675 |
| Q91W89 | Man2c1   | Alpha-mannosidase 2C1                                         | 183.08  | 4.33  | 115688 | 4  | 0.02010972 | 2.24548583 | 0.07617388  | 1.6314705e-77 | 1.0252177e-130 | 0.028632675 |
| Q9QUJ7 | Acs14    | Long-chain-fatty-acid--CoA ligase 4                           | 825.24  | 29.68 | 79077  | 16 | 0.02011737 | 1.47813783 | 0.07617388  | 3.5825558e-77 | 2.8439707e-130 | 0.028632675 |
| Q8BMA6 | Srp68    | Signal recognition particle subunit SRP68                     | 165.72  | 6.72  | 70574  | 3  | 0.0203037  | 1.50378622 | 0.076716687 | 7.8544726e-77 | 7.8807233e-130 | 0.028836709 |
| P48758 | Cbr1     | Carbonyl reductase [NADPH] 1                                  | 218.57  | 23.1  | 30641  | 6  | 0.02031447 | 1.93500609 | 0.076716687 | 1.7192976e-76 | 2.1740046e-129 | 0.028836709 |
| P06745 | Gpi      | Glucose-6-phosphate isomerase                                 | 2083.16 | 58.06 | 62767  | 34 | 0.02044202 | 1.69220508 | 0.077016811 | 3.7574627e-76 | 5.9905e-129    | 0.028949521 |
| P62843 | Rps15    | 40S ribosomal protein S15                                     | 323.18  | 39.31 | 17040  | 5  | 0.020456   | 2.03774884 | 0.077016811 | 8.1987474e-76 | 1.6451951e-128 | 0.028949521 |
| Q8CCP0 | Nemf     | Nuclear export mediator factor Nemf                           | 82.61   | 2.91  | 121188 | 2  | 0.02049413 | 2.01559918 | 0.077016811 | 1.786114e-75  | 4.5128904e-128 | 0.028949521 |
| Q2TPA8 | Hsd12    | Hydroxysteroid dehydrogenase-like protein 2                   | 36.84   | 2.86  | 54208  | 1  | 0.02050185 | 4.5647176  | 0.077016811 | 3.8848952e-75 | 1.2358858e-127 | 0.028949521 |
| Q9QUR7 | Pin1     | Peptidyl-prolyl cis-trans isomerase NIMA-interacting 1        | 134.52  | 20.61 | 18370  | 2  | 0.02062594 | 2.01168752 | 0.077381153 | 8.436407e-75  | 3.3809203e-127 | 0.029086472 |
| P28740 | Kif2a    | Kinesin-like protein KIF2A                                    | 116.47  | 3.4   | 79756  | 2  | 0.02066024 | 2.90763025 | 0.077408109 | 1.8291252e-74 | 9.2190013e-127 | 0.029096604 |
| Q80Y14 | Glrx5    | Glutaredoxin-related protein 5, mitochondrial                 | 90.76   | 17.76 | 16292  | 2  | 0.0208472  | 2.2930128  | 0.078006231 | 3.9594666e-74 | 2.5098795e-126 | 0.02932143  |
| Q4AEF8 | Copg1    | Coatomer subunit gamma-1                                      | 709.58  | 20.02 | 97614  | 12 | 0.02087532 | 1.83385605 | 0.078009209 | 8.5573021e-74 | 6.8033672e-126 | 0.029322549 |
| Q9CQT1 | Mri1     | Methylthioribose-1-phosphate isomerase                        | 419.89  | 29    | 39411  | 7  | 0.02115044 | 1.6592354  | 0.078934005 | 1.8464758e-73 | 1.8414889e-125 | 0.029670167 |
| Q8BK67 | Rcc2     | Protein RCC2                                                  | 1429.69 | 59.62 | 55983  | 24 | 0.02124164 | 1.32499114 | 0.079170857 | 3.9779244e-73 | 4.9550208e-125 | 0.029759196 |
| Q9Z0S1 | Bpnt1    | 3'(2'),5'-bisphosphate nucleotidase 1                         | 407.94  | 30.19 | 33196  | 7  | 0.02143726 | 2.10314073 | 0.079795794 | 8.5560879e-73 | 1.3298765e-124 | 0.029994101 |
| P40336 | Vps26a   | Vacuolar protein sorting-associated protein 26A               | 200.22  | 22.63 | 38114  | 5  | 0.02147438 | 2.03451697 | 0.079829903 | 1.8373816e-72 | 3.5535705e-124 | 0.030006922 |
| Q8BP48 | Metap1   | Methionine aminopeptidase 1                                   | 273.95  | 24.35 | 43221  | 6  | 0.02159407 | 1.8809776  | 0.080067236 | 3.9393855e-72 | 9.4806081e-124 | 0.030096132 |



|        |          |                                                                  |         |       |        |    |            |            |             |               |                |             |
|--------|----------|------------------------------------------------------------------|---------|-------|--------|----|------------|------------|-------------|---------------|----------------|-------------|
| Q8VBT6 | Apobr    | Apolipoprotein B receptor                                        | 546.98  | 14.65 | 102705 | 12 | 0.02159432 | 1.60301839 | 0.080067236 | 8.4326145e-72 | 2.5217069e-123 | 0.030096132 |
| Q62407 | Speg     | Striated muscle-specific serine/threonine-protein kinase         | 37.63   | 0.43  | 354343 | 1  | 0.02164927 | 56029.0338 | 0.080166867 | 1.8021886e-71 | 6.7012279e-123 | 0.030133582 |
| Q64521 | Gpd2     | Glycerol-3-phosphate dehydrogenase, mitochondrial                | 650.57  | 22.01 | 80954  | 10 | 0.02185706 | 0.64080982 | 0.080831499 | 3.8454051e-71 | 1.7774556e-122 | 0.030383408 |
| Q9ER72 | Cars     | Cysteine--tRNA ligase, cytoplasmic                               | 507.15  | 14.56 | 94860  | 9  | 0.02188659 | 2.04807095 | 0.080835994 | 8.1919521e-71 | 4.6932873e-122 | 0.030385097 |
| Q9JL18 | Sart3    | Squamous cell carcinoma antigen recognized by T-cells 3          | 366.2   | 9.88  | 109619 | 7  | 0.02191999 | 1.84836466 | 0.080854421 | 1.7423515e-70 | 1.2374809e-121 | 0.030392024 |
| Q91ZJ5 | Ugp2     | UTP--glucose-1-phosphate uridylyltransferase                     | 77.67   | 3.35  | 56979  | 2  | 0.02203003 | 1.5757605  | 0.081155797 | 3.699873e-70  | 3.2580254e-121 | 0.030505307 |
| B2RYU6 | Trappc21 | Trafficking protein particle complex subunit 2-like protein PE=2 | 51.92   | 6.47  | 16032  | 1  | 0.02214906 | 2.85368965 | 0.081409885 | 7.8440461e-70 | 8.5536938e-121 | 0.030600815 |
| D3ZLZ7 | Impdh1   | Inosine-5'-monophosphate dehydrogenase 1                         | 229.12  | 6.61  | 55293  | 4  | 0.02215604 | 2.06092452 | 0.081409885 | 1.6603335e-69 | 2.239114e-120  | 0.030600815 |
| P53564 | Cux1     | Homeobox protein cut-like 1                                      | 56.26   | 0.59  | 165596 | 1  | 0.02222401 | 4.55228004 | 0.08147911  | 3.5087466e-69 | 5.8553384e-120 | 0.030626836 |
| Q9CR95 | Necap1   | Adaptin ear-binding coat-associated protein 1                    | 132.55  | 17.45 | 29639  | 2  | 0.02223195 | 1.98034956 | 0.08147911  | 7.4030344e-69 | 1.5280303e-119 | 0.030626836 |
| Q9JJ78 | Pbk      | Lymphokine-activated killer T-cell-originated protein kinase     | 54.25   | 3.94  | 36745  | 1  | 0.02231156 | 2.16334858 | 0.081666048 | 1.5594383e-68 | 3.9834327e-119 | 0.030697103 |
| P70460 | Vasp     | Vasodilator-stimulated phosphoprotein                            | 356.57  | 20.8  | 39667  | 7  | 0.02235922 | 1.51814856 | 0.081735691 | 3.2796457e-68 | 1.0361059e-118 | 0.030723281 |
| P05555 | Itgam    | Integrin alpha-M                                                 | 1525.94 | 24.02 | 127481 | 25 | 0.02242427 | 0.7133324  | 0.081868654 | 6.8862935e-68 | 2.6903391e-118 | 0.03077326  |
| Q3UM45 | Ppp1r7   | Protein phosphatase 1 regulatory subunit 7                       | 1027.28 | 55.12 | 41292  | 17 | 0.02247962 | 2.17191552 | 0.081921978 | 1.4435891e-67 | 6.9717353e-118 | 0.030793304 |
| Q3U1J4 | Ddb1     | DNA damage-binding protein 1                                     | 1471.32 | 31.49 | 126853 | 28 | 0.02249972 | 1.34961454 | 0.081921978 | 3.021348e-67  | 1.8033395e-117 | 0.030793304 |
| Q62448 | Eif4g2   | Eukaryotic translation initiation factor 4 gamma 2               | 512.45  | 14.68 | 102106 | 10 | 0.02252496 | 1.78972125 | 0.081921978 | 6.3133018e-67 | 4.6587747e-117 | 0.030793304 |
| P07356 | Anxa2    | Annexin A2                                                       | 1472.16 | 72.27 | 38676  | 26 | 0.02266175 | 0.78347043 | 0.082314619 | 1.3170753e-66 | 1.2019493e-116 | 0.030940891 |
| Q9D906 | Atg7     | Ubiquitin-like modifier-activating enzyme ATG7                   | 277.77  | 13.47 | 77520  | 7  | 0.02274053 | 2.07666246 | 0.082495833 | 2.743232e-66  | 3.0911703e-116 | 0.031009007 |
| P54726 | Rad23a   | UV excision repair protein RAD23 homolog A                       | 282.73  | 20.66 | 39706  | 4  | 0.02281707 | 2.1050761  | 0.08263106  | 5.7044252e-66 | 7.9323415e-116 | 0.031059837 |
| Q8CIN4 | Pak2     | Serine/threonine-protein kinase PAK 2                            | 936.55  | 36.45 | 57930  | 14 | 0.02283569 | 1.72904564 | 0.08263106  | 1.1842906e-65 | 2.0311416e-115 | 0.031059837 |
| Q9JIK9 | Mrps34   | 28S ribosomal protein S34, mitochondrial                         | 151.62  | 13.76 | 25827  | 4  | 0.02293887 | 0.74423047 | 0.082870233 | 2.4547161e-65 | 5.1945723e-115 | 0.031149739 |
| B0BN72 | Mcrip1   | Mapk-regulated corepressor-interacting protein 1                 | 49.34   | 11.34 | 11101  | 1  | 0.02295984 | 2.94465505 | 0.082870233 | 5.0797282e-65 | 1.3250599e-114 | 0.031149739 |
| P80318 | Cct3     | T-complex protein 1 subunit gamma                                | 1368.41 | 40.92 | 60630  | 24 | 0.02316399 | 1.61826474 | 0.083501496 | 1.0494831e-64 | 3.3757971e-114 | 0.031387022 |
| P46462 | Vcp      | Transitional endoplasmic reticulum ATPase                        | 2920.47 | 60.79 | 89349  | 46 | 0.02322054 | 1.59397414 | 0.083517713 | 2.1647405e-64 | 8.5644074e-114 | 0.031393118 |
| Q8BNU0 | Armc6    | Armadillo repeat-containing protein 6                            | 90.76   | 4.49  | 50683  | 1  | 0.02326974 | 2.55676946 | 0.083517713 | 4.4579086e-64 | 2.1688556e-113 | 0.031393118 |
| Q569Z6 | Thrap3   | Thyroid hormone receptor-associated protein 3                    | 312.61  | 9.25  | 108178 | 6  | 0.0232733  | 0.50489851 | 0.083517713 | 9.1653916e-64 | 5.4831237e-113 | 0.031393118 |
| Q9D358 | Acp1     | Low molecular weight phosphotyrosine protein phosphatase         | 444.4   | 60.76 | 18192  | 6  | 0.02331313 | 1.80703951 | 0.083517713 | 1.8813301e-63 | 1.3848534e-112 | 0.031393118 |
| P17182 | Eno1     | Alpha-enolase                                                    | 2960.96 | 79.26 | 47141  | 39 | 0.02331475 | 1.53084117 | 0.083517713 | 3.8554289e-63 | 3.4922717e-112 | 0.031393118 |
| P70677 | Casp3    | Caspase-3                                                        | 354.9   | 25.63 | 31475  | 6  | 0.02351185 | 1.68444416 | 0.083991522 | 7.8881227e-63 | 8.7983729e-112 | 0.031571216 |
| Q75Q40 | Tomm40   | Mitochondrial import receptor subunit TOM40 homolog              | 539.18  | 39.34 | 37919  | 9  | 0.02353867 | 0.60987432 | 0.083991522 | 1.6112669e-62 | 2.2077744e-111 | 0.031571216 |
| Q9ER81 | Tor1aip2 | Torsin-1A-interacting protein 2, isoform IFRG15                  | 61.39   | 10.69 | 15278  | 1  | 0.02357921 | 2.05477229 | 0.083991522 | 3.2858953e-62 | 5.5325787e-111 | 0.031571216 |
| Q3THS6 | Mat2a    | S-adenosylmethionine synthase isoform type-2                     | 561.82  | 31.9  | 43689  | 12 | 0.02359826 | 1.78548524 | 0.083991522 | 6.6900903e-62 | 1.3842937e-110 | 0.031571216 |
| Q9JLJ2 | Aldh9a1  | 4-trimethylaminobutyraldehyde dehydrogenase                      | 1201.15 | 61.94 | 53515  | 21 | 0.02360509 | 1.53585508 | 0.083991522 | 1.3598838e-61 | 3.4594061e-110 | 0.031571216 |
| Q8COL6 | Paox     | Peroxisomal N(1)-acetyl-spermine/spermidine oxidase              | 82.37   | 3.17  | 55447  | 1  | 0.02364806 | 2.49629956 | 0.083991522 | 2.7597059e-61 | 8.6363269e-110 | 0.031571216 |
| P0C7N9 | Psmg4    | Proteasome assembly chaperone 4                                  | 93.52   | 33.33 | 13974  | 2  | 0.02365295 | 2.31555497 | 0.083991522 | 5.5913221e-61 | 2.1526205e-109 | 0.031571216 |
| B0LT89 | Stk24    | Serine/threonine-protein kinase 24                               | 234.73  | 13.46 | 47990  | 5  | 0.02369246 | 1.69685673 | 0.084027298 | 1.1309841e-60 | 5.3600861e-109 | 0.031584663 |
| Q642C0 | Dnajc8   | DnaJ homolog subfamily C member 8                                | 79.54   | 15.81 | 29813  | 2  | 0.0237311  | 6.93741999 | 0.0840599   | 2.2839594e-60 | 1.3326306e-108 | 0.031596918 |
| Q99J36 | Thumpd1  | THUMP domain-containing protein 1                                | 161.73  | 10.86 | 38885  | 3  | 0.02395267 | 1.74716807 | 0.084739636 | 4.6047883e-60 | 3.3081681e-108 | 0.031852421 |
| Q6PDY2 | Ado      | 2-aminoethanethiol dioxygenase                                   | 132.57  | 16.8  | 28372  | 4  | 0.02402318 | 1.64780553 | 0.084883868 | 9.2687241e-60 | 8.1770314e-108 | 0.031906636 |
| P40124 | Cap1     | Adenylyl cyclase-associated protein 1                            | 2419.63 | 70.68 | 51565  | 33 | 0.02410714 | 1.53338733 | 0.085075266 | 1.8625966e-59 | 2.0171563e-107 | 0.03197858  |
| Q04931 | Ssrp1    | FACT complex subunit SSRP1                                       | 254.85  | 11.42 | 80914  | 5  | 0.02416706 | 1.37458503 | 0.085181443 | 3.7368509e-59 | 4.9651588e-107 | 0.03201849  |
| Q3THK3 | Gtf2f1   | General transcription factor IIF subunit 1                       | 161.33  | 6.3   | 57241  | 2  | 0.0242775  | 2.52417377 | 0.085326347 | 7.4848039e-59 | 1.2199317e-106 | 0.03202957  |
| Q6P6S4 | Sil1     | Nucleotide exchange factor SIL1                                  | 49.28   | 1.72  | 52350  | 1  | 0.02429618 | 2.73368817 | 0.085326347 | 1.4967261e-58 | 2.9896532e-106 | 0.03202957  |
| P63174 | Rpl38    | 60S ribosomal protein L38                                        | 218.48  | 48.57 | 8218   | 4  | 0.02429784 | 1.72946665 | 0.085326347 | 2.9880718e-58 | 7.3178744e-106 | 0.03202957  |
| P70296 | Pebp1    | Phosphatidylethanolamine-binding protein 1                       | 318.11  | 49.73 | 20830  | 5  | 0.02443297 | 1.59669048 | 0.085695474 | 5.9556079e-58 | 1.789552e-105  | 0.032211707 |
| Q9JL16 | Sely     | Selenocysteine lyase                                             | 153.62  | 15.97 | 47174  | 4  | 0.02449783 | 1.8818543  | 0.085817564 | 1.1850784e-57 | 4.363338e-105  | 0.032257599 |
| Q9CX86 | Hnmpa0   | Heterogeneous nuclear ribonucleoprotein A0                       | 587.52  | 34.1  | 30530  | 10 | 0.02455168 | 0.74461971 | 0.085900807 | 2.3542553e-57 | 1.0619028e-104 | 0.032288888 |
| Q6Y7W8 | Gigyf2   | GRB10-interacting GYF protein 2                                  | 200.37  | 5.58  | 149193 | 4  | 0.02461431 | 1.91101297 | 0.086014523 | 4.6692278e-57 | 2.57992e-104   | 0.032331633 |
| Q6AYT3 | Rtcb     | tRNA-splicing ligase RtcB homolog                                | 415.91  | 23.56 | 55249  | 9  | 0.02474555 | 1.69316881 | 0.086338592 | 9.2453029e-57 | 6.256458e-104  | 0.032453446 |
| P16460 | Ass1     | Argininosuccinate synthase                                       | 287.23  | 13.11 | 46584  | 6  | 0.02476753 | 1.65638329 | 0.086338592 | 1.8276009e-56 | 1.5129361e-103 | 0.032453446 |



|        |          |                                                                   |         |       |        |     |            |            |             |               |                |             |
|--------|----------|-------------------------------------------------------------------|---------|-------|--------|-----|------------|------------|-------------|---------------|----------------|-------------|
| Q99K48 | Nono     | Non-POU domain-containing octamer-binding protein                 | 1396.54 | 55.39 | 54541  | 25  | 0.02480958 | 0.72052812 | 0.086379712 | 3.6068267e-56 | 3.6540398e-103 | 0.032468902 |
| P20108 | Prdx3    | Thioredoxin-dependent peroxide reductase, mitochondrial           | 191.54  | 26.46 | 28127  | 4   | 0.0249653  | 1.76134614 | 0.086815999 | 7.1064455e-56 | 8.8117129e-103 | 0.032632896 |
| P12749 | Rpl26    | 60S ribosomal protein L26                                         | 360.84  | 31.03 | 17277  | 8   | 0.02505362 | 1.37667322 | 0.087017138 | 1.3978558e-55 | 2.1182344e-102 | 0.032708501 |
| P10649 | Gstm1    | Glutathione S-transferase Mu 1                                    | 454.27  | 40.83 | 25970  | 8   | 0.02545375 | 1.61944114 | 0.088299448 | 2.7450777e-55 | 5.0808817e-102 | 0.033190503 |
| Q80X13 | Eif4g3   | Eukaryotic translation initiation factor 4 gamma 3                | 376.54  | 4.5   | 174890 | 9   | 0.02554031 | 1.88654612 | 0.088492209 | 5.3818152e-55 | 1.210739e-101  | 0.033262959 |
| Q9Z0X1 | Aifm1    | Apoptosis-inducing factor 1, mitochondrial                        | 728.87  | 28.92 | 66765  | 12  | 0.02560763 | 0.76414153 | 0.088617922 | 1.0533783e-54 | 2.8789943e-101 | 0.033310213 |
| Q00612 | G6pdx    | Glucose-6-phosphate 1-dehydrogenase X                             | 1594.54 | 58.83 | 59263  | 31  | 0.02568137 | 1.59424229 | 0.088669167 | 2.0583579e-54 | 6.8332676e-101 | 0.033329476 |
| P31786 | Dbi      | Acyl-CoA-binding protein                                          | 83.72   | 32.18 | 10000  | 2   | 0.02568455 | 1.4148129  | 0.088669167 | 4.0154844e-54 | 1.6187371e-100 | 0.033329476 |
| O54950 | Prkag1   | 5'-AMP-activated protein kinase subunit gamma-1                   | 155.82  | 13.33 | 37520  | 3   | 0.02594943 | 2.00884327 | 0.089475377 | 7.8205092e-54 | 3.8309703e-100 | 0.033632518 |
| Q9JKB1 | Uchl3    | Ubiquitin carboxyl-terminal hydrolase isozyme L3                  | 170.06  | 15.65 | 26152  | 3   | 0.02601706 | 1.93637101 | 0.089488799 | 1.5205885e-53 | 9.0253786e-100 | 0.033637563 |
| Q9JK23 | Psmg1    | Proteasome assembly chaperone 1                                   | 190.57  | 13.15 | 33104  | 3   | 0.02602944 | 1.91547287 | 0.089488799 | 2.9516681e-53 | 2.1224012e-99  | 0.033637563 |
| Q62393 | Tpd52    | Tumor protein D52                                                 | 191.8   | 16.07 | 24313  | 3   | 0.02609633 | 1.98441487 | 0.089488799 | 5.7200785e-53 | 4.9856495e-99  | 0.033637563 |
| Q3TIV5 | Zc3h15   | Zinc finger CCCH domain-containing protein 15                     | 188.14  | 8.22  | 48327  | 3   | 0.02610916 | 1.63019419 | 0.089488799 | 1.1066611e-52 | 1.1690333e-98  | 0.033637563 |
| P37727 | Chm      | Rab proteins geranylgeranyltransferase component A 1              | 43.48   | 1.38  | 72480  | 1   | 0.02611004 | 1.91791934 | 0.089488799 | 2.1374947e-52 | 2.738173e-98   | 0.033637563 |
| P21708 | Mapk3    | Mitogen-activated protein kinase 3                                | 385.13  | 23.16 | 43081  | 9   | 0.02614598 | 1.61092082 | 0.089504521 | 4.1216652e-52 | 6.4075637e-98  | 0.033643473 |
| Q8R050 | Gspt1    | Eukaryotic peptide chain release factor GTP-binding subunit ERF3A | 416.34  | 21.7  | 68625  | 9   | 0.0262134  | 1.35544363 | 0.089573941 | 7.9344563e-52 | 1.4973283e-97  | 0.033669567 |
| O35522 | Psmb9    | Proteasome subunit beta type-9                                    | 259.13  | 29.68 | 23427  | 5   | 0.02624169 | 1.51588457 | 0.089573941 | 1.524888e-51  | 3.4926076e-97  | 0.033669567 |
| Q9Z2W0 | Dnpep    | Aspartyl aminopeptidase                                           | 418.5   | 23.68 | 52207  | 8   | 0.02626038 | 1.92758641 | 0.089573941 | 2.9257323e-51 | 8.136162e-97   | 0.033669567 |
| Q3TBD2 | Arhgap45 | Rho GTPase-activating protein 45                                  | 175.73  | 3.94  | 122902 | 3   | 0.02632791 | 2.08733204 | 0.089618053 | 5.6041094e-51 | 1.8931355e-96  | 0.033686148 |
| Q91VR2 | Atp5f1c  | ATP synthase subunit gamma, mitochondrial                         | 482.45  | 28.52 | 32886  | 9   | 0.02634531 | 0.73268693 | 0.089618053 | 1.0716514e-50 | 4.3969687e-96  | 0.033686148 |
| Q8BH60 | Gopc     | Golgi-associated PDZ and coiled-coil motif-containing protein     | 36.83   | 1.94  | 50662  | 1   | 0.02636748 | 3.04689177 | 0.089618053 | 2.0458551e-50 | 1.0200568e-95  | 0.033686148 |
| P97379 | G3bp2    | Ras GTPase-activating protein-binding protein 2                   | 349.52  | 11.83 | 54088  | 5   | 0.02645104 | 1.83545552 | 0.089795132 | 3.8991522e-50 | 2.3635595e-95  | 0.03375271  |
| P47753 | Capza1   | F-actin-capping protein subunit alpha-1                           | 320.89  | 34.27 | 32940  | 6   | 0.02665137 | 1.51700224 | 0.09036778  | 7.4188907e-50 | 5.4654729e-95  | 0.03396796  |
| Q0P5W1 | Vps8     | Vacuolar protein sorting-associated protein 8 homolog             | 37.15   | 0.49  | 161146 | 1   | 0.02673245 | 2.10042688 | 0.090535182 | 1.4092264e-49 | 1.2593492e-94  | 0.034030884 |
| Q78PB6 | Ndel1    | Nuclear distribution protein nudE-like 1                          | 55.16   | 3.48  | 38366  | 1   | 0.02687793 | 2.45186026 | 0.090896964 | 2.6723606e-49 | 2.8960472e-94  | 0.034166873 |
| Q9WTP7 | Ak3      | GTP:AMP phosphotransferase AK3, mitochondrial                     | 259.55  | 31.72 | 25426  | 4   | 0.02691562 | 2.25021312 | 0.090896964 | 5.0591947e-49 | 6.6411985e-94  | 0.034166873 |
| P56383 | Atp5mc2  | ATP synthase F(0) complex subunit C2, mitochondrial               | 220.62  | 26.03 | 15476  | 2   | 0.02693479 | 0.05645733 | 0.090896964 | 9.5617917e-49 | 1.520817e-93   | 0.034166873 |
| P24049 | Rpl17    | 60S ribosomal protein L17                                         | 485.37  | 44.57 | 21397  | 10  | 0.02697919 | 1.72506824 | 0.090933989 | 1.8041317e-48 | 3.4785675e-93  | 0.03418079  |
| Q76N33 | Stambp1  | AMSH-like protease                                                | 75.02   | 4.59  | 49640  | 1   | 0.02704208 | 1.99439944 | 0.090933989 | 3.3983473e-48 | 7.9446684e-93  | 0.03418079  |
| Q91ZX7 | Lrp1     | Prolow-density lipoprotein receptor-related protein 1             | 6453.88 | 32.48 | 504742 | 109 | 0.02707198 | 0.68148853 | 0.090933989 | 6.3905375e-48 | 1.8113423e-92  | 0.03418079  |
| Q99L47 | St13     | Hsc70-interacting protein                                         | 396.37  | 22.64 | 41656  | 8   | 0.02707317 | 1.71001377 | 0.090933989 | 1.1997109e-47 | 4.1243754e-92  | 0.03418079  |
| Q9ZOR6 | Itsn2    | Intersectin-2                                                     | 44.16   | 0.72  | 188908 | 1   | 0.02712908 | 2.39817546 | 0.09093775  | 2.2484589e-47 | 9.3822523e-92  | 0.034182203 |
| Q6ZQ58 | Larp1    | La-related protein 1                                              | 283.35  | 7.09  | 121125 | 5   | 0.02713799 | 1.50236572 | 0.09093775  | 4.2068975e-47 | 2.1308082e-91  | 0.034182203 |
| Q9D1G2 | Pmvk     | Phosphomevalonate kinase                                          | 162.67  | 19.27 | 21916  | 3   | 0.02720366 | 2.07095327 | 0.091050933 | 7.8579095e-47 | 4.8342478e-91  | 0.034224747 |
| Q3TCJ1 | Abraxas2 | BRISC complex subunit Abraxas 2                                   | 218.47  | 14.7  | 46943  | 4   | 0.02761151 | 1.97761788 | 0.092307788 | 1.4652771e-46 | 1.0948345e-90  | 0.034697181 |
| P56480 | Atp5f1b  | ATP synthase subunit beta, mitochondrial                          | 2393.99 | 69    | 56300  | 35  | 0.02765187 | 0.70452828 | 0.09233461  | 2.7277189e-46 | 2.464607e-90   | 0.034707263 |
| Q63584 | Tmed10   | Transmembrane emp24 domain-containing protein 10                  | 412.94  | 27.85 | 24858  | 7   | 0.02772931 | 0.83496116 | 0.092485015 | 5.0692782e-46 | 5.5402505e-90  | 0.034763799 |
| Q69ZS7 | Hbs11    | HBS1-like protein                                                 | 101.36  | 2.79  | 75100  | 2   | 0.02782663 | 2.39306433 | 0.092701318 | 9.4049997e-46 | 1.2430684e-89  | 0.034845104 |
| P53811 | Pitpnb   | Phosphatidylinositol transfer protein beta isoform                | 221.46  | 27.68 | 31487  | 6   | 0.02792894 | 1.84734165 | 0.092877184 | 1.7419556e-45 | 2.7831727e-89  | 0.034911209 |
| Q3V1V3 | Esf1     | ESF1 homolog                                                      | 48.98   | 1.42  | 98048  | 1   | 0.02794448 | 1.88440495 | 0.092877184 | 3.2209243e-45 | 6.2178621e-89  | 0.034911209 |
| Q32PX7 | Fubp1    | Far upstream element-binding protein 1                            | 712.51  | 27.39 | 67197  | 14  | 0.02813214 | 1.35228736 | 0.093238117 | 5.945503e-45  | 1.3875841e-88  | 0.035046879 |
| P97369 | Ncf4     | Neutrophil cytosol factor 4                                       | 670.34  | 50.74 | 38707  | 12  | 0.02814651 | 1.27098724 | 0.093238117 | 1.0956222e-44 | 3.0866514e-88  | 0.035046879 |
| O88902 | Ptpn23   | Tyrosine-protein phosphatase non-receptor type 23                 | 87.02   | 1.73  | 163454 | 2   | 0.02817442 | 2.56206607 | 0.093238117 | 2.0155644e-44 | 6.8586816e-88  | 0.035046879 |
| P62852 | Rps25    | 40S ribosomal protein S25                                         | 299.9   | 29.6  | 13742  | 5   | 0.02818371 | 1.60112109 | 0.093238117 | 3.7016525e-44 | 1.5221129e-87  | 0.035046879 |
| P21107 | Tpm3     | Tropomyosin alpha-3 chain                                         | 568.34  | 22.46 | 32994  | 10  | 0.0282618  | 1.9159598  | 0.093291401 | 6.7866778e-44 | 3.37445e-87    | 0.035066907 |
| Q8KOV4 | Cnot3    | CCR4-NOT transcription complex subunit 3                          | 47.01   | 2.53  | 81946  | 1   | 0.02826517 | 7.01943922 | 0.093291401 | 1.2421697e-43 | 7.4670664e-87  | 0.035066907 |
| Q61081 | Cdc37    | Hsp90 co-chaperone Cdc37                                          | 301.26  | 14.25 | 44593  | 5   | 0.02838747 | 1.73396215 | 0.093441033 | 2.2696883e-43 | 1.650733e-86   | 0.035123152 |
| Q6PAM1 | Txlna    | Alpha-taxilin                                                     | 167.46  | 6.14  | 62369  | 2   | 0.02838982 | 2.24038644 | 0.093441033 | 4.1401168e-43 | 3.6405521e-86  | 0.035123152 |
| O09167 | Rpl21    | 60S ribosomal protein L21                                         | 328.88  | 38.12 | 18562  | 6   | 0.02840869 | 1.45160673 | 0.093441033 | 7.5391005e-43 | 8.021254e-86   | 0.035123152 |

|        |          |                                                                                  |         |       |        |    |            |            |             |               |               |             |
|--------|----------|----------------------------------------------------------------------------------|---------|-------|--------|----|------------|------------|-------------|---------------|---------------|-------------|
| P58252 | Eef2     | Elongation factor 2                                                              | 3752.25 | 61.07 | 95314  | 58 | 0.0285323  | 1.57033924 | 0.093739603 | 1.3705236e-42 | 1.765289e-85  | 0.03523538  |
| Q8BLJ7 | Rufy1    | RUN and FYVE domain-containing protein 1                                         | 112.63  | 4.92  | 80376  | 2  | 0.02863511 | 1.82481593 | 0.093969232 | 2.4872135e-42 | 3.875703e-85  | 0.035321694 |
| Q8BG52 | Bola2    | Bola-like protein 2                                                              | 91.62   | 20.93 | 10215  | 2  | 0.02876429 | 2.02866144 | 0.094284791 | 4.5060772e-42 | 8.4909489e-85 | 0.035440309 |
| P53996 | Cnbp     | Cellular nucleic acid-binding protein                                            | 330.92  | 43.26 | 19592  | 6  | 0.02886572 | 1.59774735 | 0.094508745 | 8.1497199e-42 | 1.8556769e-84 | 0.035524489 |
| Q8BMP6 | Acbd3    | Golgi resident protein GCP60                                                     | 395.69  | 20.76 | 60181  | 7  | 0.02897764 | 2.35181742 | 0.094668336 | 1.4714473e-41 | 4.0469983e-84 | 0.035584478 |
| Q62084 | Ppp1r14b | Protein phosphatase 1 regulatory subunit 14B                                     | 43.38   | 17.01 | 15957  | 1  | 0.02899727 | 2.06439252 | 0.094668336 | 2.6521875e-41 | 8.8063989e-84 | 0.035584478 |
| Q9Z0U1 | Tjp2     | Tight junction protein ZO-2                                                      | 87.57   | 2.66  | 131280 | 3  | 0.02901394 | 2.5689343  | 0.094668336 | 4.7722221e-41 | 1.9140899e-83 | 0.035584478 |
| Q62189 | Snrpa    | U1 small nuclear ribonucleoprotein A                                             | 361.1   | 31.01 | 31835  | 8  | 0.02917755 | 0.8222546  | 0.095093495 | 8.5722235e-41 | 4.1556503e-83 | 0.035744289 |
| Q5FVM3 | Retreg1  | Reticulophagy regulator 1 E=2                                                    | 64.63   | 2.29  | 52782  | 1  | 0.02942384 | 3.24240832 | 0.095786832 | 1.5371711e-40 | 8.9969999e-83 | 0.036004904 |
| Q8BGA9 | Oxa11    | Mitochondrial inner membrane protein OXA1L                                       | 40.43   | 2.08  | 48220  | 1  | 0.02961093 | 0.74373643 | 0.096210687 | 2.7517329e-40 | 1.9406133e-82 | 0.036164226 |
| Q8R1B4 | Eif3c    | Eukaryotic translation initiation factor 3 subunit C                             | 910.54  | 18.22 | 105531 | 16 | 0.02962143 | 1.47350258 | 0.096210687 | 4.9175093e-40 | 4.1731564e-82 | 0.036164226 |
| Q07813 | Bax      | Apoptosis regulator BAX                                                          | 354.61  | 40.62 | 21395  | 5  | 0.02968716 | 1.56337712 | 0.096314587 | 8.7728032e-40 | 8.9647639e-82 | 0.03620328  |
| P56812 | Pdcd5    | Programmed cell death protein 5                                                  | 259.72  | 45.24 | 14275  | 5  | 0.02981773 | 1.66146838 | 0.096332558 | 1.5623752e-39 | 1.9226178e-81 | 0.036210035 |
| Q9D7E3 | Ovca2    | Esterase OVCA2                                                                   | 42.82   | 4.89  | 24246  | 1  | 0.02982408 | 2.52234383 | 0.096332558 | 2.7777013e-39 | 4.1135354e-81 | 0.036210035 |
| Q9EPL8 | Ipo7     | Importin-7                                                                       | 346.48  | 5.39  | 119486 | 5  | 0.02984147 | 1.84332058 | 0.096332558 | 4.9299036e-39 | 8.7923678e-81 | 0.036210035 |
| P84091 | Ap2m1    | AP-2 complex subunit mu                                                          | 534.71  | 31.26 | 49655  | 12 | 0.02985574 | 1.59249466 | 0.096332558 | 8.734609e-39  | 1.8772012e-80 | 0.036210035 |
| P33610 | Prim2    | DNA primase large subunit                                                        | 253.3   | 11.09 | 58408  | 4  | 0.02986141 | 2.0696751  | 0.096332558 | 1.5448992e-38 | 4.0035413e-80 | 0.036210035 |
| Q62885 | Unc119   | Protein unc-119 homolog A                                                        | 107.48  | 9.17  | 27048  | 2  | 0.03004954 | 2.28171108 | 0.096830051 | 2.7277708e-38 | 8.5299523e-80 | 0.036397036 |
| Q9DAW6 | Prpf4    | U4/U6 small nuclear ribonucleoprotein Prp4                                       | 181.96  | 9.98  | 58370  | 4  | 0.03010178 | 0.5732796  | 0.09688905  | 4.808019e-38  | 1.8119587e-79 | 0.036419212 |
| P10605 | Ctsb     | Cathepsin B                                                                      | 1457.13 | 63.72 | 37280  | 21 | 0.03018029 | 1.48687771 | 0.097032363 | 8.4600798e-38 | 3.8432517e-79 | 0.036473082 |
| P09528 | Fth1     | Ferritin heavy chain                                                             | 51.69   | 3.85  | 21067  | 1  | 0.03027686 | 1.53851103 | 0.097233331 | 1.4860458e-37 | 8.1371946e-79 | 0.036548623 |
| Q62418 | Dbn1     | Drebrin-like protein                                                             | 700.57  | 32.34 | 48700  | 10 | 0.03040573 | 1.31533077 | 0.097396702 | 2.6057866e-37 | 1.7194622e-78 | 0.036610032 |
| Q8VCT3 | Rnpep    | Aminopeptidase B                                                                 | 1093.15 | 38.46 | 72416  | 17 | 0.03043867 | 1.5129328  | 0.097396702 | 4.561355e-37  | 3.6249671e-78 | 0.036610032 |
| Q99JF8 | Psip1    | PC4 and SFRS1-interacting protein                                                | 373.52  | 17.23 | 59697  | 7  | 0.03046361 | 0.80850161 | 0.097396702 | 7.9707044e-37 | 7.6323533e-78 | 0.036610032 |
| P83868 | Ptges3   | Prostaglandin E synthase 3                                                       | 99.75   | 18.75 | 18721  | 2  | 0.03046419 | 1.91945744 | 0.097396702 | 1.3904225e-36 | 1.6050647e-77 | 0.036610032 |
| Q8BHG1 | Nrde     | Nardilysin                                                                       | 339.35  | 7.24  | 132891 | 6  | 0.03062023 | 2.19031052 | 0.097786078 | 2.4212722e-36 | 3.372241e-77  | 0.036756392 |
| P30999 | Ctnnd1   | Catenin delta-1                                                                  | 200.81  | 6.18  | 104925 | 5  | 0.03076198 | 3.32916991 | 0.098128999 | 4.2090744e-36 | 7.066721e-77  | 0.036885292 |
| Q80WJ7 | Mtdh     | Protein LYRIC                                                                    | 398.5   | 15.89 | 63846  | 7  | 0.03086256 | 0.80648447 | 0.098333663 | 7.3042426e-36 | 1.4772756e-76 | 0.036962222 |
| Q07832 | Plk1     | Serine/threonine-protein kinase PLK1                                             | 52.95   | 2.16  | 68301  | 1  | 0.03089502 | 2.32259666 | 0.098333663 | 1.2653447e-35 | 3.0820619e-76 | 0.036962222 |
| O88531 | Ppt1     | Palmitoyl-protein thioesterase 1                                                 | 424.97  | 23.86 | 34490  | 6  | 0.03103069 | 1.52361431 | 0.09855658  | 2.1881998e-35 | 6.4219784e-76 | 0.037046013 |
| P97310 | Mcm2     | DNA replication licensing factor MCM2                                            | 1505.4  | 35.95 | 102078 | 25 | 0.03107925 | 1.20006559 | 0.09855658  | 3.77754e-35   | 1.334986e-75  | 0.037046013 |
| P62918 | Rpl8     | 60S ribosomal protein L8                                                         | 569.76  | 42.02 | 28025  | 11 | 0.03109805 | 1.33968107 | 0.09855658  | 6.5099033e-35 | 2.7711548e-75 | 0.037046013 |
| P26450 | Pik3r1   | Phosphatidylinositol 3-kinase regulatory subunit alpha                           | 48.96   | 1.66  | 83517  | 1  | 0.03110314 | 2.29803569 | 0.09855658  | 1.1199092e-34 | 5.7458579e-75 | 0.037046013 |
| Q3MID3 | Arfgap2  | ADP-ribosylation factor GTPase-activating protein 2                              | 226.48  | 11.92 | 56556  | 5  | 0.03130928 | 2.05298475 | 0.099099768 | 1.9232395e-34 | 1.1901994e-74 | 0.03725019  |
| Q9D903 | Ebna1bp2 | Probable rRNA-processing protein EBP2 PE=2                                       | 147.95  | 10.46 | 34703  | 3  | 0.03138489 | 0.66016523 | 0.099229081 | 3.2970506e-34 | 2.4578572e-74 | 0.037298797 |
| Q8R1S4 | Mtss1    | Metastasis suppressor protein 1                                                  | 241.07  | 8.83  | 82408  | 5  | 0.0314965  | 1.84906017 | 0.099471808 | 5.6423366e-34 | 5.0670121e-74 | 0.037390034 |
| Q9CRA5 | Golph3   | Golgi phosphoprotein 3                                                           | 131.4   | 10.4  | 33752  | 2  | 0.03167397 | 1.93742197 | 0.099812001 | 9.639021e-34  | 1.0424322e-73 | 0.037517908 |
| P62914 | Rpl11    | 60S ribosomal protein L11                                                        | 632.19  | 54.49 | 20252  | 11 | 0.03167414 | 1.36972972 | 0.099812001 | 1.643792e-33  | 2.1387417e-73 | 0.037517908 |
| P11497 | Acaca    | Acetyl-CoA carboxylase 1                                                         | 179.64  | 2.6   | 265194 | 4  | 0.03176953 | 2.03235397 | 0.099928308 | 2.7983383e-33 | 4.3839266e-73 | 0.037561626 |
| Q9ERS5 | Plekha2  | Pleckstrin homology domain-containing family A member 2                          | 91.66   | 5.65  | 47380  | 2  | 0.03180204 | 2.00530654 | 0.099928308 | 4.7554589e-33 | 8.9690463e-73 | 0.037561626 |
| P61161 | Actr2    | Actin-related protein 2                                                          | 1206.3  | 46.7  | 44761  | 18 | 0.03182779 | 1.53310206 | 0.099928308 | 8.0672019e-33 | 1.8326607e-72 | 0.037561626 |
| P84228 | Hist1h3b | Histone H3.2                                                                     | 804.84  | 61.76 | 15388  | 11 | 0.03185105 | 0.32791502 | 0.099928308 | 1.3661272e-32 | 3.7402406e-72 | 0.037561626 |
| Q99K23 | Ufsp2    | Ufm1-specific protease 2                                                         | 168.22  | 8.24  | 52515  | 4  | 0.03196669 | 1.75122294 | 0.10018101  | 2.3093857e-32 | 7.6244558e-72 | 0.037656614 |
| Q4QQT4 | Ppp2r1b  | Serine/threonine-protein phosphatase 2A 65 kDa regulatory subunit A beta isoform | 570.71  | 14.98 | 66006  | 8  | 0.03207656 | 1.58537141 | 0.10034126  | 3.8970714e-32 | 1.5509987e-71 | 0.03771685  |
| Q2YDW2 | Msto1    | Protein misato homolog 1                                                         | 135.72  | 5.22  | 61230  | 3  | 0.03208812 | 1.83811967 | 0.10034126  | 6.5647204e-32 | 3.1487256e-71 | 0.03771685  |
| Q6PGH2 | Jpt2     | Jupiter microtubule associated homolog 2                                         | 162.14  | 21.58 | 20020  | 3  | 0.0322535  | 1.40668341 | 0.10074806  | 1.1038994e-31 | 6.3855878e-71 | 0.03786976  |
| Q8BZA9 | Tigar    | Fructose-2,6-bisphosphatase TIGAR                                                | 181.81  | 19.33 | 29191  | 3  | 0.03230321 | 1.53530782 | 0.10079308  | 1.8530093e-31 | 1.2916782e-70 | 0.037886681 |
| Q922F4 | Tubb6    | Tubulin beta-6 chain                                                             | 1790.93 | 61.97 | 50090  | 29 | 0.03250214 | 1.56218711 | 0.10125654  | 3.104988e-31  | 2.6090913e-70 | 0.038060888 |
| P61750 | Arf4     | ADP-ribosylation factor 4                                                        | 645.19  | 47.22 | 20397  | 9  | 0.03252268 | 1.46779995 | 0.10125654  | 5.1936886e-31 | 5.2550615e-70 | 0.038060888 |
| Q8QZY1 | Eif3l    | Eukaryotic translation initiation factor 3 subunit L                             | 823.12  | 24.82 | 66613  | 12 | 0.03262232 | 1.73697512 | 0.10145612  | 8.6721134e-31 | 1.0572387e-69 | 0.038135908 |
| Q6ZQM8 | Ugt1a7c  | UDP-glucuronosyltransferase 1-7C                                                 | 575.4   | 31.83 | 59758  | 14 | 0.03269925 | 0.78576611 | 0.10157587  | 1.4454613e-30 | 2.1229704e-69 | 0.038180921 |
| P24063 | Itegal   | Integrin alpha-L                                                                 | 61.08   | 0.95  | 128328 | 1  | 0.03273198 | 0.64507843 | 0.10157587  | 2.4050266e-30 | 4.2558541e-69 | 0.038180921 |
| Q9DBR1 | Xrn2     | 5'-3' exoribonuclease 2                                                          | 869.56  | 21.14 | 108687 | 16 | 0.03285145 | 1.17602624 | 0.10183594  | 3.9945201e-30 | 8.5209015e-69 | 0.038278677 |

|        |         |                                                                                  |         |       |        |    |            |            |            |               |               |             |
|--------|---------|----------------------------------------------------------------------------------|---------|-------|--------|----|------------|------------|------------|---------------|---------------|-------------|
| Q61035 | Hars    | Histidine--tRNA ligase, cytoplasmic                                              | 569.23  | 30.45 | 57432  | 12 | 0.03293027 | 1.71915391 | 0.10193791 | 6.6227755e-30 | 1.7024794e-68 | 0.038317006 |
| Q6AYA1 | Gar1    | H/ACA ribonucleoprotein complex subunit 1                                        | 104.08  | 9.73  | 23011  | 2  | 0.03295576 | 0.60757817 | 0.10193791 | 1.0960884e-29 | 3.3958255e-68 | 0.038317006 |
| Q68FH4 | Galk2   | N-acetylgalactosamine kinase                                                     | 108.72  | 5.02  | 50503  | 2  | 0.03300472 | 1.88578266 | 0.1019421  | 1.8108424e-29 | 6.7654307e-68 | 0.038318581 |
| Q8C878 | Uba3    | NEDD8-activating enzyme E1 catalytic subunit                                     | 158.9   | 14.07 | 51737  | 3  | 0.03302853 | 2.28630695 | 0.1019421  | 2.9863771e-29 | 1.3459705e-67 | 0.038318581 |
| P23116 | Eif3a   | Eukaryotic translation initiation factor 3 subunit A                             | 910.71  | 14.21 | 161936 | 19 | 0.03316074 | 1.40494163 | 0.10222136 | 4.9162842e-29 | 2.6746576e-67 | 0.038423551 |
| Q8CGY8 | Ogt     | UDP-N-acetylglucosamine--peptide N-acetylglucosaminyltransferase 110 kDa subunit | 320.67  | 8.41  | 116952 | 6  | 0.03319061 | 1.7898405  | 0.10222136 | 8.0789895e-29 | 5.3033785e-67 | 0.038423551 |
| Q80X41 | Vrk1    | Serine/threonine-protein kinase VRK1                                             | 203.91  | 16.82 | 49741  | 4  | 0.03323877 | 1.54397168 | 0.10225938 | 1.3252696e-28 | 1.0502807e-66 | 0.038437842 |
| P49718 | Mcm5    | DNA replication licensing factor MCM5                                            | 1088.75 | 30.97 | 82343  | 22 | 0.03337235 | 1.32663044 | 0.10240836 | 2.1700911e-28 | 2.0770752e-66 | 0.038493841 |
| O08579 | Emd     | Emerin                                                                           | 335.04  | 47.88 | 29436  | 7  | 0.03338261 | 0.7493132  | 0.10240836 | 3.5471343e-28 | 4.0987394e-66 | 0.038493841 |
| Q91WD5 | Ndufs2  | NADH dehydrogenase [ubiquinone] iron-sulfur protein 2, mitochondrial             | 338.61  | 16.41 | 52626  | 5  | 0.03339481 | 0.53582119 | 0.10240836 | 5.7876548e-28 | 8.0797056e-66 | 0.038493841 |
| Q62048 | Pea15   | Astrocytic phosphoprotein PEA-15                                                 | 156.7   | 16.92 | 15054  | 3  | 0.03345378 | 3.24375799 | 0.10247912 | 9.4265404e-28 | 1.5910328e-65 | 0.03852044  |
| O88447 | Klc1    | Kinesin light chain 1                                                            | 104.17  | 4.44  | 61450  | 2  | 0.03356468 | 1.92050885 | 0.10270865 | 1.5325906e-27 | 3.1283398e-65 | 0.038606716 |
| Q62426 | Cstb    | Cystatin-B                                                                       | 245.11  | 66.33 | 11046  | 4  | 0.03361109 | 1.78493748 | 0.10274054 | 2.4872732e-27 | 6.138954e-65  | 0.038618705 |
| O35841 | Api5    | Apoptosis inhibitor 5                                                            | 603.03  | 27.18 | 56785  | 9  | 0.03374434 | 1.40528045 | 0.10303754 | 4.0294309e-27 | 1.2030321e-64 | 0.038730342 |
| P35700 | Prdx1   | Peroxiredoxin-1                                                                  | 1457.55 | 86.43 | 22176  | 26 | 0.03384528 | 1.55136145 | 0.10321556 | 6.5160773e-27 | 2.3524532e-64 | 0.038797256 |
| P28474 | Adh5    | Alcohol dehydrogenase class-3                                                    | 971.23  | 54.01 | 39548  | 14 | 0.03390577 | 1.69835394 | 0.10321556 | 1.0518418e-26 | 4.5915069e-64 | 0.038797256 |
| P60517 | Gabarap | Gamma-aminobutyric acid receptor-associated protein                              | 186.83  | 21.37 | 13918  | 3  | 0.0339111  | 1.7130242  | 0.10321556 | 1.6948671e-26 | 8.9482744e-64 | 0.038797256 |
| P49717 | Mcm4    | DNA replication licensing factor MCM4                                            | 1020.22 | 25.87 | 96736  | 17 | 0.03397562 | 1.2346481  | 0.10330182 | 2.7260973e-26 | 1.7421589e-63 | 0.038829681 |
| Q9CR00 | Psmc9   | 26S proteasome non-ATPase regulatory subunit 9                                   | 49.21   | 5.41  | 24720  | 1  | 0.0340702  | 2.93308186 | 0.10347916 | 4.3769024e-26 | 3.3866473e-63 | 0.03889634  |
| Q6AXS3 | Dek     | Protein DEK                                                                      | 210.5   | 10.58 | 42892  | 4  | 0.03425415 | 1.22273393 | 0.10384425 | 7.0147402e-26 | 6.5715898e-63 | 0.039033573 |
| P14841 | Cst3    | Cystatin-C                                                                       | 118.42  | 17.14 | 15437  | 2  | 0.03428297 | 2.31517259 | 0.10384425 | 1.122212e-25  | 1.2718853e-62 | 0.039033573 |
| P35434 | Atp5f1d | ATP synthase subunit delta, mitochondrial                                        | 182.54  | 15.48 | 17595  | 3  | 0.03433022 | 0.75619665 | 0.10384425 | 1.7920751e-25 | 2.4586678e-62 | 0.039033573 |
| Q8BVE3 | Atp6v1h | V-type proton ATPase subunit H                                                   | 268.1   | 13.04 | 55855  | 5  | 0.03434317 | 1.37942623 | 0.10384425 | 2.8566355e-25 | 4.746302e-62  | 0.039033573 |
| Q27W01 | Rbm8a   | RNA-binding protein 8A                                                           | 251.44  | 32.18 | 19889  | 4  | 0.03438252 | 0.64516697 | 0.10384425 | 4.54538e-25   | 9.1526051e-62 | 0.039033573 |
| Q4G009 | Mcts1   | Malignant T-cell-amplified sequence 1                                            | 121.98  | 10.44 | 20550  | 1  | 0.03440864 | 1.08786286 | 0.10384425 | 7.2194092e-25 | 1.7626528e-61 | 0.039033573 |
| Q9D892 | Itpa    | Inosine triphosphate pyrophosphatase                                             | 69.54   | 5.56  | 21897  | 1  | 0.03452095 | 1.94651247 | 0.1040732  | 1.1445864e-24 | 3.3905588e-61 | 0.039119631 |
| Q9D270 | Zdhhc21 | Probable palmitoyltransferase ZDHHC21                                            | 49.75   | 3.02  | 31331  | 1  | 0.03461489 | 0.56551727 | 0.10424632 | 1.8113834e-24 | 6.5092767e-61 | 0.039184705 |
| P68181 | Prkacb  | cAMP-dependent protein kinase catalytic subunit beta                             | 261.26  | 16.24 | 40708  | 5  | 0.03482485 | 1.85278755 | 0.10476812 | 2.8614515e-24 | 1.2474474e-60 | 0.039380843 |
| Q9JMH9 | Myo18a  | Unconventional myosin-XVIIIa                                                     | 226.5   | 3.07  | 232755 | 5  | 0.03499721 | 1.93334044 | 0.10517583 | 4.5120715e-24 | 2.3840159e-60 | 0.039534094 |
| Q8VC03 | Eml3    | Echinoderm microtubule-associated protein-like 3                                 | 142.55  | 4.12  | 95695  | 3  | 0.03516049 | 2.03618729 | 0.1055554  | 7.1019649e-24 | 4.5450605e-60 | 0.039676771 |
| Q9QZ88 | Vps29   | Vacuolar protein sorting-associated protein 29                                   | 200.28  | 37.36 | 20496  | 5  | 0.03544596 | 1.98174118 | 0.10621304 | 1.1158181e-23 | 8.6447456e-60 | 0.039923968 |
| Q3T1J9 | Mob1a   | MOB kinase activator 1A                                                          | 183.3   | 18.98 | 25080  | 5  | 0.03545395 | 1.69509344 | 0.10621304 | 1.7499271e-23 | 1.6387265e-59 | 0.039923968 |
| P20152 | Vim     | Vimentin                                                                         | 3985.31 | 85.19 | 53688  | 65 | 0.03554437 | 1.53903888 | 0.1063723  | 2.7394134e-23 | 3.1032547e-59 | 0.039983832 |
| Q6AYT7 | Abhd12  | Monoacylglycerol lipase ABHD12                                                   | 475.06  | 31.41 | 45296  | 10 | 0.03561373 | 0.63534647 | 0.10646826 | 4.2806095e-23 | 5.8665925e-59 | 0.040019902 |
| Q8K2C9 | Hacd3   | Very-long-chain (3R)-3-hydroxyacyl-CoA dehydratase 3                             | 39.76   | 2.21  | 43131  | 1  | 0.0357367  | 0.04874584 | 0.10672415 | 6.676724e-23  | 1.1073604e-58 | 0.040116087 |
| Q4QQR9 | Memo1   | Protein MEMO1                                                                    | 49.26   | 4.71  | 33679  | 1  | 0.03578646 | 2.68119828 | 0.10676106 | 1.0395141e-22 | 2.0860994e-58 | 0.040129961 |
| Q9DCN2 | Cyb5r3  | NADH-cytochrome b5 reductase 3                                                   | 772.85  | 35.88 | 34128  | 11 | 0.0359292  | 0.70086439 | 0.10702825 | 1.6154958e-22 | 3.9245295e-58 | 0.040230391 |
| Q6PGL7 | Washc2  | WASH complex subunit 2                                                           | 103.18  | 3.15  | 145311 | 2  | 0.03595099 | 2.60254957 | 0.10702825 | 2.5060467e-22 | 7.3674335e-58 | 0.040230391 |
| Q9D706 | Rpap3   | RNA polymerase II-associated protein 3                                           | 131.8   | 4.39  | 74096  | 2  | 0.03623854 | 2.25650373 | 0.10767295 | 3.8804286e-22 | 1.3815029e-57 | 0.040472727 |
| Q99L45 | Eif2s2  | Eukaryotic translation initiation factor 2 subunit 2                             | 516.94  | 38.07 | 38092  | 10 | 0.03625873 | 1.32251233 | 0.10767295 | 5.9975904e-22 | 2.5820111e-57 | 0.040472727 |
| P15429 | Eno3    | Beta-enolase                                                                     | 668.53  | 19.82 | 47014  | 7  | 0.03630315 | 1.62924079 | 0.10767295 | 9.252942e-22  | 4.8203564e-57 | 0.040472727 |
| Q8VE10 | Naa40   | N-alpha-acetyltransferase 40                                                     | 69.45   | 5.06  | 27229  | 1  | 0.03631841 | 1.77495335 | 0.10767295 | 1.4249124e-21 | 8.9873066e-57 | 0.040472727 |
| Q8BYA0 | Tbcd    | Tubulin-specific chaperone D                                                     | 135.78  | 3.09  | 133321 | 3  | 0.03644942 | 2.0881997  | 0.10794925 | 2.1902874e-21 | 1.6738269e-56 | 0.040576585 |
| Q9ESX5 | Dkc1    | H/ACA ribonucleoprotein complex subunit DKC1                                     | 849.71  | 35.76 | 57402  | 16 | 0.03658754 | 0.58135948 | 0.10824604 | 3.3606094e-21 | 3.1111412e-56 | 0.040688143 |
| Q5U3K5 | Rabl6   | Rab-like protein 6                                                               | 54.02   | 1.52  | 79831  | 1  | 0.03678841 | 2.32154526 | 0.10872765 | 5.1468121e-21 | 5.7707906e-56 | 0.040869173 |
| P12368 | Prkar2a | cAMP-dependent protein kinase type II-alpha regulatory subunit                   | 251.98  | 12.97 | 45480  | 4  | 0.03686259 | 1.80877584 | 0.10883421 | 7.8679441e-21 | 1.0676912e-55 | 0.040909228 |
| P47857 | Pfkm    | ATP-dependent 6-phosphofructokinase, muscle type                                 | 268.67  | 7.56  | 85269  | 6  | 0.03698606 | 1.51295242 | 0.10886004 | 1.2005666e-20 | 1.9723666e-55 | 0.040918937 |
| Q99LX0 | Park7   | Protein/nucleic acid deglycase DJ-1                                              | 862.06  | 85.71 | 20021  | 14 | 0.03701703 | 1.53238343 | 0.10886004 | 1.8285743e-20 | 3.6365932e-55 | 0.040918937 |
| Q8CI71 | Vps50   | Syndetin                                                                         | 91.89   | 2.07  | 111174 | 2  | 0.03705705 | 1.79643795 | 0.10886004 | 2.7799674e-20 | 6.6970181e-55 | 0.040918937 |
| Q60931 | Vdac3   | Voltage-dependent anion-selective channel protein 3                              | 407.52  | 28.98 | 30753  | 6  | 0.03707122 | 0.66713182 | 0.10886004 | 4.2185855e-20 | 1.2317337e-54 | 0.040918937 |
| Q9CQ71 | Rpa3    | Replication protein A 14 kDa subunit                                             | 72.45   | 30.58 | 13584  | 2  | 0.03708341 | 1.56500574 | 0.10886004 | 6.3898905e-20 | 2.2630141e-54 | 0.040918937 |



|         |          |                                                                     |         |       |        |    |            |            |            |               |                |             |
|---------|----------|---------------------------------------------------------------------|---------|-------|--------|----|------------|------------|------------|---------------|----------------|-------------|
| P62889  | Rpl30    | 60S ribosomal protein L30                                           | 437.35  | 58.26 | 12784  | 7  | 0.03710011 | 1.60957385 | 0.10886004 | 9.6609255e-20 | 4.1533496e-54  | 0.040918937 |
| P70582  | Nup54    | Nuclear pore complex protein Nup54                                  | 136.49  | 4.51  | 55745  | 2  | 0.03718479 | 0.69690095 | 0.1089965  | 1.4579484e-19 | 7.6143769e-54  | 0.040970228 |
| P68433  | Hist1h3a | Histone H3.1                                                        | 745.88  | 61.76 | 15404  | 11 | 0.03723589 | 0.33432056 | 0.10903432 | 2.196155e-19  | 1.3936927e-53  | 0.040984448 |
| P53042  | Ppp5c    | Serine/threonine-protein phosphatase 5                              | 219.69  | 9.02  | 56917  | 3  | 0.03727723 | 2.25477655 | 0.10904355 | 3.3020269e-19 | 2.5474692e-53  | 0.040987915 |
| Q8V BV7 | Cops8    | COP9 signalosome complex subunit 8                                  | 216.54  | 29.67 | 23256  | 4  | 0.03735951 | 1.7985526  | 0.10908828 | 4.9555782e-19 | 4.650422e-53   | 0.04100473  |
| Q3TIU4  | Pde12    | 2',5'-phosphodiesterase 12                                          | 76.18   | 4.11  | 67514  | 2  | 0.03740219 | 2.11884319 | 0.10908828 | 7.4234111e-19 | 8.4758194e-53  | 0.04100473  |
| P14824  | Anxa6    | Annexin A6                                                          | 682.14  | 21.25 | 75885  | 13 | 0.03741947 | 0.74069421 | 0.10908828 | 1.1099604e-18 | 1.5427942e-52  | 0.04100473  |
| Q9WV85  | Nme3     | Nucleoside diphosphate kinase 3                                     | 75.17   | 10.06 | 19099  | 1  | 0.03744537 | 2.27534707 | 0.10908828 | 1.6565538e-18 | 2.8051385e-52  | 0.04100473  |
| P29341  | Pabpc1   | Polyadenylate-binding protein 1                                     | 1989.39 | 60.22 | 70671  | 33 | 0.0375212  | 1.41387871 | 0.10919777 | 2.4677269e-18 | 5.0943816e-52  | 0.041045886 |
| P97287  | Mcl1     | Induced myeloid leukemia cell differentiation protein Mcl-1 homolog | 50.22   | 3.93  | 35217  | 1  | 0.03763424 | 120461.585 | 0.10923729 | 3.6692847e-18 | 9.2375256e-52  | 0.041060739 |
| P04550  | Ptms     | Parathyromosin                                                      | 73.71   | 10.78 | 11559  | 1  | 0.03768423 | 1.26577869 | 0.10923729 | 5.4457519e-18 | 1.6719625e-51  | 0.041060739 |
| Q9D2Y4  | Mlk1     | Mixed lineage kinase domain-like protein                            | 67.31   | 2.97  | 54317  | 1  | 0.03769801 | 1.75794588 | 0.10923729 | 8.0672543e-18 | 3.0221075e-51  | 0.041060739 |
| P02301  | H3f3c    | Histone H3.3C 3                                                     | 574.81  | 54.41 | 15315  | 9  | 0.03770303 | 0.33489212 | 0.10923729 | 1.1928461e-17 | 5.4566047e-51  | 0.041060739 |
| O09117  | Syp11    | Synaptophysin-like protein 1                                        | 83.03   | 4.21  | 28899  | 2  | 0.03781233 | 0.70878187 | 0.10923729 | 1.7604886e-17 | 9.8421851e-51  | 0.041060739 |
| Q6PCT3  | Tpd5212  | Tumor protein D54                                                   | 361.36  | 32.73 | 23992  | 6  | 0.03783345 | 3.44835619 | 0.10923729 | 2.5934115e-17 | 1.7720696e-50  | 0.041060739 |
| Q91VY9  | Znf622   | Zinc finger protein 622                                             | 61.8    | 4.41  | 53451  | 1  | 0.03788661 | 1.76899696 | 0.10923729 | 3.8132777e-17 | 3.1869393e-50  | 0.041060739 |
| Q9CWU9  | Nup37    | Nucleoporin Nup37                                                   | 133.98  | 10.12 | 36732  | 2  | 0.03795016 | 0.54609225 | 0.10923729 | 5.5964616e-17 | 5.723576e-50   | 0.041060739 |
| Q99P69  | Nuf2     | Kinetochore protein Nuf2                                            | 35.47   | 2.38  | 54594  | 1  | 0.0379524  | 3.35243408 | 0.10923729 | 8.1981535e-17 | 1.0264283e-49  | 0.041060739 |
| P62962  | Pfn1     | Profilin-1                                                          | 1196.8  | 94.29 | 14957  | 18 | 0.03795342 | 1.61346034 | 0.10923729 | 1.1986857e-16 | 1.8388732e-49  | 0.041060739 |
| P53994  | Rab2a    | Ras-related protein Rab-2A                                          | 478.13  | 38.68 | 23548  | 8  | 0.03796646 | 0.74945196 | 0.10923729 | 1.7493659e-16 | 3.2910889e-49  | 0.041060739 |
| P11499  | Hsp90ab1 | Heat shock protein HSP 90-beta                                      | 4353.79 | 70.03 | 83281  | 63 | 0.03799392 | 1.62704511 | 0.10923729 | 2.5482463e-16 | 5.8837303e-49  | 0.041060739 |
| Q9CR60  | Golt1b   | Vesicle transport protein GOT1B                                     | 151.02  | 10.87 | 15422  | 2  | 0.03830082 | 0.52854875 | 0.1100089  | 3.7049885e-16 | 2.10506178e-48 | 0.041350776 |
| O08583  | Alyref   | THO complex subunit 4                                               | 441.15  | 47.06 | 26940  | 6  | 0.03853796 | 0.73920926 | 0.11048657 | 5.3767072e-16 | 1.8699924e-48  | 0.041530325 |
| P62835  | Rap1a    | Ras-related protein Rap-1A                                          | 826     | 75    | 20987  | 13 | 0.03854453 | 0.86795704 | 0.11048657 | 7.7880597e-16 | 3.3194456e-48  | 0.041530325 |
| P36916  | Gnl1     | Guanine nucleotide-binding protein-like 1                           | 138.93  | 5.27  | 68771  | 3  | 0.03862605 | 2.27083925 | 0.1106092  | 1.1259649e-15 | 5.8862584e-48  | 0.041576421 |
| P45376  | Akr1b1   | Aldose reductase                                                    | 1012.93 | 50.32 | 35732  | 18 | 0.0387006  | 1.664188   | 0.11065913 | 1.6248095e-15 | 1.0421474e-47  | 0.04159519  |
| Q9D2R0  | Aacs     | Acetoacetyl-CoA synthetase                                          | 118.49  | 4.17  | 75200  | 3  | 0.03872101 | 1.80063754 | 0.11065913 | 2.3402454e-15 | 1.842286e-47   | 0.04159519  |
| O89110  | Casp8    | Caspase-8                                                           | 116.36  | 4.38  | 55357  | 2  | 0.03887019 | 2.9419681  | 0.1109744  | 3.3643487e-15 | 3.2530359e-47  | 0.041713694 |
| Q8BGA5  | Krr1     | KRR1 small subunit processome component homolog                     | 129.86  | 7.89  | 43538  | 3  | 0.03898191 | 1.86222461 | 0.11110896 | 4.8274812e-15 | 5.7323366e-47  | 0.041764274 |
| P84096  | Rhog     | Rho-related GTP-binding protein RhoG                                | 599.43  | 58.12 | 21309  | 9  | 0.03899516 | 1.32644902 | 0.11110896 | 6.9138424e-15 | 1.0083281e-46  | 0.041764274 |
| P62907  | Rpl10a   | 60S ribosomal protein L10a                                          | 794.08  | 50.69 | 24831  | 15 | 0.03904798 | 1.23100169 | 0.11114853 | 9.8831863e-15 | 1.7717307e-46  | 0.041779146 |
| P62982  | Rps27a   | Ubiquitin-40S ribosomal protein S27a                                | 730.07  | 58.97 | 17951  | 12 | 0.03918236 | 0.71179528 | 0.11133812 | 1.4101082e-14 | 3.1088455e-46  | 0.041850413 |
| O88738  | Birc6    | Baculoviral IAP repeat-containing protein 6                         | 111.77  | 0.8   | 532170 | 3  | 0.03919258 | 1.76741588 | 0.11133812 | 2.0080991e-14 | 5.4445474e-46  | 0.041850413 |
| Q3TDD9  | Ppp1r21  | Protein phosphatase 1 regulatory subunit 21                         | 43.24   | 1.92  | 88338  | 1  | 0.03940278 | 1.67834526 | 0.111824   | 2.854266e-14  | 9.5248458e-46  | 0.042033048 |
| Q3V300  | Kif22    | Kinesin-like protein KIF22                                          | 199.06  | 5.3   | 73190  | 3  | 0.03958963 | 2.48199654 | 0.11224269 | 4.0492972e-14 | 1.662236e-45   | 0.042190428 |
| P54731  | Faf1     | FAS-associated factor 1                                             | 93.16   | 2     | 73863  | 2  | 0.03970739 | 1.9884257  | 0.11246487 | 5.7337675e-14 | 2.8942788e-45  | 0.042273943 |
| Q91WT8  | Rbm47    | RNA-binding protein 47                                              | 42.72   | 3.39  | 64062  | 1  | 0.0398106  | 2.51921891 | 0.11263094 | 8.1035451e-14 | 5.0304598e-45  | 0.042336365 |
| Q9EST4  | Psmg2    | Proteasome assembly chaperone 2                                     | 145.19  | 10.98 | 29524  | 4  | 0.03984492 | 2.21810937 | 0.11263094 | 1.1430991e-13 | 8.7284831e-45  | 0.042336365 |
| P57716  | Ncastn   | Nicastrin                                                           | 165.31  | 6.36  | 78492  | 4  | 0.03995348 | 0.63030523 | 0.1126784  | 1.6094071e-13 | 1.5126376e-44  | 0.042354204 |
| E9Q555  | Rnf213   | E3 ubiquitin-protein ligase RNF213                                  | 48.5    | 0.14  | 584784 | 1  | 0.0400256  | 5.02314768 | 0.1126784  | 2.2616241e-13 | 2.61686e-44    | 0.042354204 |
| Q9CZW4  | Acs13    | Long-chain-fatty-acid--CoA ligase 3                                 | 321.46  | 9.17  | 80492  | 5  | 0.04005057 | 1.94620571 | 0.1126784  | 3.1720992e-13 | 4.5204409e-44  | 0.042354204 |
| Q5XI13  | Grwd1    | Glutamate-rich WD repeat-containing protein 1                       | 82.53   | 6.74  | 49169  | 2  | 0.04008313 | 1.78621064 | 0.1126784  | 4.4406266e-13 | 7.7996264e-44  | 0.042354204 |
| Q9JKP5  | Mbnl1    | Muscleblind-like protein 1                                          | 350.63  | 25.22 | 36976  | 6  | 0.04009072 | 1.49488041 | 0.1126784  | 6.2045774e-13 | 1.3441129e-43  | 0.042354204 |
| Q8R1F1  | Fam129b  | Niban-like protein 1                                                | 398.35  | 12.28 | 84819  | 8  | 0.04009851 | 1.53728022 | 0.1126784  | 8.6526662e-13 | 2.3138611e-43  | 0.042354204 |
| Q91VC3  | Eif4a3   | Eukaryotic initiation factor 4A-III                                 | 707.67  | 27.49 | 46840  | 11 | 0.04019697 | 0.83359075 | 0.11284399 | 1.2043613e-12 | 3.9790244e-43  | 0.042416447 |
| Q6ZQI3  | Mlec     | Malectin                                                            | 128.98  | 9.97  | 32342  | 2  | 0.04029815 | 0.70262675 | 0.11301691 | 1.6731392e-12 | 6.8311659e-43  | 0.042481443 |
| Q62318  | Trim28   | Transcription intermediary factor 1-beta                            | 1463.95 | 42.45 | 88847  | 24 | 0.04048653 | 1.16594065 | 0.1134338  | 2.3199313e-12 | 1.170807e-42   | 0.04263815  |
| Q99JH1  | Rpp251   | Ribonuclease P protein subunit p25-like protein                     | 38.46   | 5.52  | 17675  | 1  | 0.04058182 | 2.19308716 | 0.11354243 | 3.2105928e-12 | 2.0021849e-42  | 0.042678981 |
| P27659  | Rpl3     | 60S ribosomal protein L3                                            | 1300.46 | 45.16 | 46110  | 20 | 0.04060484 | 1.11288288 | 0.11354243 | 4.4346745e-12 | 3.4183434e-42  | 0.042678981 |
| Q8R146  | Apeh     | Acylamino-acid-releasing enzyme                                     | 300.03  | 13.25 | 81581  | 5  | 0.04081602 | 2.18264891 | 0.11399119 | 6.1136981e-12 | 5.8293753e-42  | 0.042847662 |
| Q3UHX2  | Pdap1    | 28 kDa heat- and acid-stable phosphoprotein                         | 353.81  | 22.65 | 20605  | 5  | 0.04084518 | 1.83354084 | 0.11399119 | 8.4122328e-12 | 9.9174597e-42  | 0.042847662 |
| P54775  | Psmc4    | 26S proteasome regulatory subunit 6B                                | 397.47  | 23.92 | 47408  | 8  | 0.0408869  | 1.283073   | 0.1139962  | 1.1552686e-11 | 1.6852232e-41  | 0.042849547 |
| Q3UEB3  | Puf60    | Poly(U)-binding-splicing factor PUF60                               | 528.65  | 22.7  | 60249  | 8  | 0.04110564 | 1.22359627 | 0.11449423 | 1.583501e-11  | 2.8599445e-41  | 0.04303675  |
| P41216  | Acs11    | Long-chain-fatty-acid--CoA ligase 1                                 | 132.42  | 29.61 | 77951  | 16 | 0.04132754 | 1.21530584 | 0.11500013 | 2.1662908e-11 | 4.8419043e-41  | 0.043226908 |
| Q8BRN9  | Cc2d1b   | Coiled-coil and C2 domain-containing protein 1B                     | 70.91   | 2.71  | 93091  | 1  | 0.04145188 | 2.24243709 | 0.1151501  | 2.9578596e-11 | 8.1776828e-41  | 0.043283281 |



|         |          |                                                                              |         |       |        |    |            |            |            |               |               |             |
|---------|----------|------------------------------------------------------------------------------|---------|-------|--------|----|------------|------------|------------|---------------|---------------|-------------|
| P14882  | Pcca     | Propionyl-CoA carboxylase alpha chain, mitochondrial                         | 41.72   | 2.04  | 81623  | 1  | 0.0414621  | 0.0541788  | 0.1151501  | 4.0308815e-11 | 1.378695e-40  | 0.043283281 |
| P30904  | Mif      | Macrophage migration inhibitory factor                                       | 183.07  | 17.39 | 12477  | 3  | 0.0415687  | 1.67002505 | 0.11533396 | 5.482562e-11  | 2.3218718e-40 | 0.043352391 |
| P13832  | Rlc-a    | Myosin regulatory light chain RLC-A                                          | 199.63  | 29.07 | 19895  | 4  | 0.04172783 | 2.11742542 | 0.11566307 | 7.4426473e-11 | 3.9037407e-40 | 0.043476099 |
| Q61166  | Mapre1   | Microtubule-associated protein RP/EB family member 1                         | 323.06  | 30.6  | 30016  | 6  | 0.04180373 | 1.29682673 | 0.11576105 | 1.0083958e-10 | 6.5502482e-40 | 0.04351293  |
| P35123  | Usp4     | Ubiquitin carboxyl-terminal hydrolase 4                                      | 210.45  | 7.9   | 108343 | 5  | 0.04209273 | 2.35784899 | 0.11644839 | 1.3636209e-10 | 1.0974682e-39 | 0.04377129  |
| Q9EST5  | Anp32b   | Acidic leucine-rich nuclear phosphoprotein 32 family member B                | 373.31  | 25.74 | 31079  | 8  | 0.042213   | 1.43818454 | 0.11666806 | 1.8404103e-10 | 1.8336771e-39 | 0.043853858 |
| P82343  | Renbp    | N-acylglucosamine 2-epimerase                                                | 125.93  | 11.4  | 49771  | 3  | 0.04231596 | 2.26555958 | 0.11673745 | 2.4790963e-10 | 3.0584349e-39 | 0.043879942 |
| Q9D883  | U2af1    | Splicing factor U2AF 35 kDa subunit                                          | 333.06  | 22.18 | 27815  | 5  | 0.04231988 | 1.43111939 | 0.11673745 | 3.332953e-10  | 5.0929297e-39 | 0.043879942 |
| Q9JKB3  | Ybx3     | Y-box-binding protein 3                                                      | 525.42  | 26.87 | 38814  | 7  | 0.0423714  | 1.70230774 | 0.11676673 | 4.4722018e-10 | 8.4719998e-39 | 0.04389095  |
| Q9R1T4  | Sept6    | Septin-6                                                                     | 97.89   | 6.22  | 49620  | 3  | 0.0424341  | 2.2965471  | 0.11682675 | 5.9892074e-10 | 1.4074389e-38 | 0.043913511 |
| P61027  | Rab10    | Ras-related protein Rab-10                                                   | 504.11  | 34    | 22541  | 8  | 0.04288257 | 0.61273868 | 0.11794773 | 8.0052043e-10 | 2.334906e-38  | 0.04433487  |
| P25206  | Mcm3     | DNA replication licensing factor MCM3                                        | 1298.46 | 33.5  | 91546  | 20 | 0.04303963 | 1.27138186 | 0.11826576 | 1.0678984e-09 | 3.8593988e-38 | 0.044454415 |
| Q8CFE2  | Hpf1     | Histone PARylation factor 1                                                  | 112.24  | 7.8   | 39291  | 2  | 0.04313649 | 1.91361806 | 0.11841797 | 1.4218091e-09 | 6.3669725e-38 | 0.044511627 |
| Q8VII6  | Sfpq     | Splicing factor, proline- and glutamine-rich                                 | 1483.98 | 33.19 | 75442  | 24 | 0.04320463 | 0.77990621 | 0.11844469 | 1.8893213e-09 | 1.0487295e-37 | 0.04452167  |
| P23514  | Copb1    | Coatomer subunit beta                                                        | 657.7   | 17.52 | 107011 | 13 | 0.0432292  | 1.77929244 | 0.11844469 | 2.5056642e-09 | 1.7249801e-37 | 0.04452167  |
| Q9R1P1  | Psmb3    | Proteasome subunit beta type-3                                               | 809.18  | 51.71 | 22965  | 13 | 0.04327078 | 1.48450621 | 0.11844496 | 3.3165902e-09 | 2.8340252e-37 | 0.04452177  |
| Q99LC3  | Ndufa10  | NADH dehydrogenase [ubiquinone] 1 alpha subcomplex subunit 10, mitochondrial | 337.17  | 19.44 | 40603  | 6  | 0.0433896  | 0.61648904 | 0.1186191  | 4.3813912e-09 | 4.6502789e-37 | 0.04458723  |
| P09411  | Pgk1     | Phosphoglycerate kinase 1                                                    | 2549.8  | 77.94 | 44550  | 37 | 0.0434175  | 1.57687514 | 0.1186191  | 5.7767409e-09 | 7.6175912e-37 | 0.04458723  |
| P48962  | Slc25a4  | ADP/ATP translocase 1                                                        | 1241.76 | 60.07 | 32904  | 21 | 0.0434826  | 0.70042386 | 0.1186834  | 7.6015779e-09 | 1.2463665e-36 | 0.044611397 |
| P16884  | Nefh     | Neurofilament heavy polypeptide                                              | 82.43   | 1.59  | 115378 | 2  | 0.0436048  | 2.11830561 | 0.11890325 | 9.9832972e-09 | 2.0364357e-36 | 0.044694037 |
| Q61036  | Pak3     | Serine/threonine-protein kinase PAK 3                                        | 417.75  | 13.95 | 62398  | 7  | 0.0436953  | 1.61967733 | 0.11896607 | 1.3085581e-08 | 3.3216391e-36 | 0.044717649 |
| Q8BLUK6 | Hook3    | Protein Hook homolog 3                                                       | 81.27   | 3.62  | 83218  | 2  | 0.04371118 | 4.83274574 | 0.11896607 | 1.7118283e-08 | 5.4096578e-36 | 0.044717649 |
| O08709  | Prdx6    | Peroxiredoxin-6                                                              | 857.43  | 72.77 | 24871  | 15 | 0.04389868 | 1.70348817 | 0.11935746 | 2.2349865e-08 | 8.80045e-36   | 0.044864769 |
| Q9JHI5  | Ivd      | Isovaleryl-CoA dehydrogenase, mitochondrial                                  | 323.11  | 16.75 | 46325  | 7  | 0.0439386  | 0.74509161 | 0.11935746 | 2.9123031e-08 | 1.428699e-35  | 0.044864769 |
| Q64324  | Stxbp2   | Syntaxin-binding protein 2                                                   | 290.05  | 16.69 | 66357  | 6  | 0.04410765 | 1.61157383 | 0.1197028  | 3.7874295e-08 | 2.316521e-35  | 0.044994576 |
| Q99K51  | Pls3     | Plastin-3                                                                    | 1330.34 | 41.43 | 70742  | 22 | 0.04432725 | 1.67798431 | 0.1201659  | 4.9158462e-08 | 3.7487022e-35 | 0.04516865  |
| P10639  | Txn      | Thioredoxin                                                                  | 234.83  | 35.24 | 11675  | 4  | 0.04438198 | 1.67043517 | 0.1201659  | 6.3679137e-08 | 6.0528174e-35 | 0.04516865  |
| P11352  | Gpx1     | Glutathione peroxidase 1                                                     | 119.38  | 15.92 | 22329  | 3  | 0.04440563 | 2.2799499  | 0.1201659  | 8.2326682e-08 | 9.7602503e-35 | 0.04516865  |
| Q641Z8  | Pefl1    | Peflin                                                                       | 63.59   | 4.59  | 30012  | 1  | 0.04444665 | 2.22215035 | 0.1201659  | 1.0622532e-07 | 1.5720421e-34 | 0.04516865  |
| P22892  | Ap1g1    | AP-1 complex subunit gamma-1                                                 | 370.12  | 10.71 | 91350  | 7  | 0.04461443 | 1.43453615 | 0.12050539 | 1.3679142e-07 | 2.5288633e-34 | 0.045296259 |
| Q63228  | Gmfb     | Glia maturation factor beta                                                  | 271.63  | 35.21 | 16736  | 4  | 0.04469895 | 1.38261519 | 0.12061956 | 1.7580553e-07 | 4.060194e-34  | 0.045339172 |
| Q9ZZX2  | Psmd10   | 26S proteasome non-ATPase regulatory subunit 10                              | 82.89   | 3.46  | 25084  | 1  | 0.04487895 | 2.83928713 | 0.12099094 | 2.25501e-07   | 6.509164e-34  | 0.04547877  |
| P11167  | Slc2a1   | Solute carrier family 2, facilitated glucose transporter member 1            | 270.66  | 9.96  | 53963  | 4  | 0.04507204 | 0.58050465 | 0.1213813  | 2.8867298e-07 | 1.041453e-33  | 0.045625498 |
| Q8K183  | Pdxk     | Pyridoxal kinase                                                             | 258.76  | 17.31 | 35015  | 5  | 0.04510878 | 2.13307989 | 0.1213813  | 3.6881192e-07 | 1.6628893e-33 | 0.045625498 |
| Q6GQT9  | Nomo1    | Nodal modulator 1                                                            | 806.74  | 18.45 | 133420 | 14 | 0.0451961  | 0.48896775 | 0.12139343 | 4.7026689e-07 | 2.6519038e-33 | 0.045630059 |
| P14733  | Lmbn1    | Lamin-B1                                                                     | 2214.53 | 59.69 | 66786  | 40 | 0.04523892 | 0.66284586 | 0.12139343 | 5.9844457e-07 | 4.22286e-33   | 0.045630059 |
| Q80VD1  | Fam98b   | Protein FAM98B                                                               | 252.46  | 13.29 | 45349  | 5  | 0.04524084 | 1.82458539 | 0.12139343 | 7.6005151e-07 | 6.7160167e-33 | 0.045630059 |
| P62855  | Rps26    | 40S ribosomal protein S26                                                    | 194.42  | 24.35 | 13015  | 3  | 0.04533591 | 1.35787438 | 0.12153429 | 9.6338784e-07 | 1.0670018e-32 | 0.045683006 |
| P52633  | Stat6    | Signal transducer and transcription activator 6                              | 124.14  | 4.06  | 93497  | 3  | 0.04572805 | 2.06445754 | 0.12247054 | 1.2187028e-06 | 1.692602e-32  | 0.046034929 |
| Q5M947  | Rrp15    | RRP15-like protein                                                           | 54.1    | 3.93  | 30926  | 1  | 0.04577783 | 0.64374385 | 0.12248895 | 1.538624e-06  | 2.6767976e-32 | 0.046041848 |
| Q61171  | Prdx2    | Peroxiredoxin-2                                                              | 668.63  | 57.58 | 21779  | 11 | 0.04608273 | 1.45897023 | 0.12305941 | 1.9386736e-06 | 4.2278463e-32 | 0.046256278 |
| P63245  | Rack1    | Receptor of activated protein C kinase 1                                     | 1567.29 | 81.07 | 35077  | 26 | 0.04612673 | 1.4491407  | 0.12305941 | 2.4378892e-06 | 6.6604095e-32 | 0.046256278 |
| P70188  | Kifap3   | Kinesin-associated protein 3                                                 | 42.04   | 2.52  | 91291  | 1  | 0.04613183 | 6.72135589 | 0.12305941 | 3.0595656e-06 | 1.0479506e-31 | 0.046256278 |
| D3ZBE5  | Nek7     | Serine/threonine-protein kinase Nek7                                         | 60.98   | 7.95  | 34529  | 2  | 0.04616344 | 2.15346752 | 0.12305941 | 3.8321428e-06 | 1.6471136e-31 | 0.046256278 |
| P97797  | Sirpa    | Tyrosine-protein phosphatase non-receptor type substrate 1                   | 167.75  | 8.97  | 56425  | 3  | 0.04629281 | 0.78300758 | 0.12328916 | 4.7902617e-06 | 2.5857696e-31 | 0.046342637 |
| E9Q4Z2  | Acacb    | Acetyl-CoA carboxylase 2                                                     | 63.4    | 1.35  | 275750 | 2  | 0.04642434 | 2.74407605 | 0.12352422 | 5.9760194e-06 | 4.0525279e-31 | 0.046430995 |
| Q66HG8  | Ik       | Protein Red                                                                  | 98.65   | 7.18  | 65588  | 3  | 0.04657352 | 1.93458884 | 0.12380577 | 7.4404555e-06 | 6.340579e-31  | 0.046536824 |
| P60521  | Gabarap2 | Gamma-aminobutyric acid receptor-associated protein-like 2                   | 179.61  | 36.75 | 13667  | 4  | 0.04685111 | 2.14044015 | 0.12429252 | 9.245308e-06  | 9.9028943e-31 | 0.046719786 |
| Q60605  | Myl6     | Myosin light polypeptide 6                                                   | 753.38  | 66.23 | 16930  | 11 | 0.04685827 | 1.18873988 | 0.12429252 | 1.1465082e-05 | 1.542956e-30  | 0.046719786 |
| Q9EQ80  | Nif3l1   | NIF3-like protein 1                                                          | 368.02  | 19.95 | 41746  | 7  | 0.04688723 | 1.65869462 | 0.12429252 | 1.4189481e-05 | 2.4015032e-30 | 0.046719786 |

|        |         |                                                                               |         |       |        |    |            |            |            |               |               |             |
|--------|---------|-------------------------------------------------------------------------------|---------|-------|--------|----|------------|------------|------------|---------------|---------------|-------------|
| Q9QZ73 | Deun1d1 | DCN1-like protein 1                                                           | 45.08   | 5.02  | 30097  | 1  | 0.04694835 | 1.80065898 | 0.1243391  | 1.7526249e-05 | 3.7333913e-30 | 0.046737293 |
| Q9DC69 | Ndufa9  | NADH dehydrogenase [ubiquinone] 1 alpha subcomplex subunit 9, mitochondrial   | 366.92  | 23.61 | 42525  | 6  | 0.0470649  | 0.64375434 | 0.12447807 | 2.1604501e-05 | 5.7962313e-30 | 0.046789532 |
| A1L1L2 | Tmem214 | Transmembrane protein 214                                                     | 65.71   | 2.04  | 76566  | 1  | 0.04708803 | 0.53527204 | 0.12447807 | 2.6578588e-05 | 8.9844812e-30 | 0.046789532 |
| Q4V7A6 | Phf10   | PHD finger protein 10                                                         | 39.26   | 2.41  | 55884  | 1  | 0.0471534  | 2.15917081 | 0.12453557 | 3.2632599e-05 | 1.3910475e-29 | 0.046811146 |
| Q8BMZ5 | Tsen34  | tRNA-splicing endonuclease subunit Sen34                                      | 86.17   | 7.59  | 34196  | 2  | 0.04733272 | 1.90708053 | 0.12489365 | 3.9985558e-05 | 2.1508164e-29 | 0.046945741 |
| Q61210 | Arhgef1 | Rho guanine nucleotide exchange factor 1                                      | 523.33  | 12.83 | 102805 | 9  | 0.04737774 | 1.28649875 | 0.124897   | 4.8897437e-05 | 3.3192544e-29 | 0.046947001 |
| P30285 | Cdk4    | Cyclin-dependent kinase 4                                                     | 129.44  | 8.25  | 33751  | 2  | 0.04757625 | 1.60756841 | 0.1253046  | 5.9676066e-05 | 5.1160341e-29 | 0.047100212 |
| O08788 | Dctn1   | Dynactin subunit 1                                                            | 295.4   | 7.57  | 141676 | 6  | 0.04763409 | 1.27860571 | 0.12534131 | 7.2685056e-05 | 7.8698425e-29 | 0.047114012 |
| D4A2Z8 | Dhx36   | ATP-dependent DNA/RNA helicase DHX36                                          | 220.46  | 6.4   | 113843 | 4  | 0.0479486  | 1.9701595  | 0.12605273 | 8.8352875e-05 | 1.2090072e-28 | 0.047381424 |
| P24452 | Capg    | Macrophage-capping protein                                                    | 1306.43 | 42.61 | 39240  | 16 | 0.04811746 | 1.52623626 | 0.1261418  | 0.00010718317 | 1.8526804e-28 | 0.047414903 |
| Q9QY17 | Pacsin2 | Protein kinase C and casein kinase substrate in neurons 2 protein             | 164.27  | 8.4   | 55978  | 4  | 0.04814826 | 2.5481087  | 0.1261418  | 0.00012976652 | 2.8338795e-28 | 0.047414903 |
| P05064 | Aldoa   | Fructose-bisphosphate aldolase A                                              | 2479.37 | 82.69 | 39356  | 35 | 0.04818029 | 1.47514655 | 0.1261418  | 0.00015679371 | 4.3296274e-28 | 0.047414903 |
| O08560 | Dgkz    | Diacylglycerol kinase zeta                                                    | 147.96  | 7.32  | 104009 | 4  | 0.04818768 | 1.75489267 | 0.1261418  | 0.00018907077 | 6.607004e-28  | 0.047414903 |
| O54734 | Ddost   | Dolichyl-diphosphooligosaccharide--protein glycosyltransferase 48 kDa subunit | 855.66  | 39.46 | 49028  | 13 | 0.04823851 | 0.79491894 | 0.1261418  | 0.0002275358  | 1.0071444e-27 | 0.047414903 |
| P21619 | LmnB2   | Lamin-B2                                                                      | 520.9   | 15.94 | 67318  | 9  | 0.04824758 | 0.78205048 | 0.1261418  | 0.00027327791 | 1.5332904e-27 | 0.047414903 |
| P54311 | Gnb1    | Guanine nucleotide-binding protein G(I)/G(S)/G(T) subunit beta-1              | 561.43  | 31.76 | 37377  | 9  | 0.04838997 | 0.71644009 | 0.12639832 | 0.00032755833 | 2.3317648e-27 | 0.047511326 |
| Q9CWX8 | Snx2    | Sorting nexin-2                                                               | 1284.68 | 44.12 | 58471  | 21 | 0.04848199 | 1.46433714 | 0.12652292 | 0.00039183392 | 3.5400432e-27 | 0.047558162 |
| P51881 | Slc25a5 | ADP/ATP translocase 2                                                         | 1922.33 | 78.19 | 32931  | 28 | 0.04856131 | 0.6802426  | 0.1266142  | 0.00046778316 | 5.3665629e-27 | 0.047592472 |
| O08810 | Eftud2  | 116 kDa U5 small nuclear ribonucleoprotein component                          | 933.4   | 25.23 | 109361 | 19 | 0.04871467 | 1.49424915 | 0.12689816 | 0.00055733494 | 8.1240553e-27 | 0.04769921  |
| Q3T114 | Prrc1   | Protein PRRC1 2                                                               | 65.9    | 2.93  | 46295  | 1  | 0.04883931 | 2.15295752 | 0.12707561 | 0.00066270017 | 1.2277074e-26 | 0.047765911 |
| P62254 | Ube2g1  | Ubiquitin-conjugating enzyme E2 G1                                            | 45.17   | 5.88  | 19509  | 1  | 0.04888212 | 1.76812537 | 0.12707561 | 0.00078640639 | 1.8523352e-26 | 0.047765911 |
| Q3TJZ6 | Fam98a  | Protein FAM98A                                                                | 182.92  | 8.35  | 55055  | 4  | 0.04891632 | 1.68482887 | 0.12707561 | 0.00093133552 | 2.7912923e-26 | 0.047765911 |
| Q9CPS7 | Pno1    | RNA-binding protein PNO1                                                      | 292.98  | 38.31 | 27454  | 7  | 0.04902705 | 1.55192702 | 0.12724749 | 0.0011007648  | 4.2011472e-26 | 0.047830516 |
| Q7TNC4 | Luc7l2  | Putative RNA-binding protein Luc7-like 2                                      | 347.62  | 20.41 | 46583  | 7  | 0.04910451 | 1.46655696 | 0.12733277 | 0.0012984113  | 6.3133587e-26 | 0.047862571 |
| P24135 | Pleg2   | 1-phosphatidylinositol 4,5-bisphosphate phosphodiesterase gamma-2             | 218.19  | 4.43  | 147735 | 6  | 0.04929108 | 1.70764486 | 0.12770057 | 0.0015284792  | 9.474296e-26  | 0.04800824  |
| P35585 | Ap1m1   | AP-1 complex subunit mu-1                                                     | 223.66  | 14.89 | 48543  | 5  | 0.04962847 | 1.79525547 | 0.12845811 | 0.001795711   | 1.4191276e-25 | 0.04828557  |
| Q8C166 | Cpne1   | Copine-1                                                                      | 634.77  | 27.05 | 58887  | 12 | 0.04973723 | 0.79197995 | 0.12862299 | 0.0021054416  | 2.1203369e-25 | 0.048347549 |
| Q3U9G9 | Lbr     | Lamin-B receptor                                                              | 552.18  | 17.73 | 71440  | 10 | 0.04983745 | 0.47576062 | 0.12869866 | 0.0024636561  | 3.1632178e-25 | 0.048375992 |
| Q9D1E6 | Tbcb    | Tubulin-folding cofactor B                                                    | 44.83   | 8.2   | 27386  | 1  | 0.04985664 | 2.69318231 | 0.12869866 | 0.0028770498  | 4.712058e-25  | 0.048375992 |
| Q9D4H8 | Cul2    | Cullin-2                                                                      | 49.27   | 1.74  | 86877  | 1  | 0.0499042  | 3.78866862 | 0.12870506 | 0.0033530912  | 7.0113093e-25 | 0.048378397 |
