# Supplementary material for: Does size matter? A proteomics-informed comparison of the effects of polystyrene beads of different sizes on macrophages
Source: Royal Society of Chemistry journal article supplement (doi:10.1039/d2en00214k), 2022-01-01
Supplement: d2en00214k11.pdf [file d2en00214k11.pdf]

Supplementary Table 4: list of proteins which abundance is significantly modified in response to cell exposure to 10 micrometers polystyrene particles

BH: false discovery rate according to Benjamini-Hochberg; SGoF: false discovery rate according to the sequential goodness of fit method; SFisher: false discovery rate according to the sequential Fisher method

| acc number | gene_name | description                                                   | protein_set_score | coverage | MW     | #peptides | T test 10 $\mu$ m | ratio 10 $\mu$ m/ctrl | B-H          | SGoF+ | SFisher | Q-value      |
|------------|-----------|---------------------------------------------------------------|-------------------|----------|--------|-----------|-------------------|-----------------------|--------------|-------|---------|--------------|
| Q99KC8     | Vwa5a     | von Willebrand factor A domain-containing protein 5A          | 1687.11           | 45.4     | 87143  | 28        | 2.5264E-06        | 2.29677407            | 0.0033546647 | 0     | 0       | 0.0013087798 |
| Q9QXS1     | Plec      | Plectin                                                       | 7877.069          | 38.39    | 534188 | 147       | 2.617E-06         | 2.18292978            | 0.0033546647 | 0     | 0       | 0.0013087798 |
| Q8BTM8     | Flna      | Filamin-A                                                     | 4874.93           | 41.48    | 281222 | 76        | 3.525E-06         | 3.33355131            | 0.0033546647 | 0     | 0       | 0.0013087798 |
| P11250     | Rpl34     | 60S ribosomal protein L34                                     | 153.17            | 20.51    | 13507  | 3         | 1.2663E-05        | 0.34866962            | 0.005561507  | 0     | 0       | 0.0021697512 |
| P51569     | Gla       | Alpha-galactosidase A                                         | 270.09            | 14.32    | 47643  | 4         | 1.3112E-05        | 3.79340336            | 0.005561507  | 0     | 0       | 0.0021697512 |
| Q9EQP2     | Ehd4      | EH domain-containing protein 4                                | 849.75            | 35.86    | 61481  | 17        | 1.7686E-05        | 2.61603399            | 0.005561507  | 0     | 0       | 0.0021697512 |
| P19253     | Rpl13a    | 60S ribosomal protein L13a                                    | 566.97            | 43.35    | 23464  | 11        | 1.7828E-05        | 0.51772024            | 0.005561507  | 0     | 0       | 0.0021697512 |
| Q9QXG4     | Acss2     | Acetyl-coenzyme A synthetase, cytoplasmic                     | 195.12            | 6.42     | 78862  | 3         | 1.8641E-05        | 3.91902394            | 0.005561507  | 0     | 0       | 0.0021697512 |
| P97449     | Anpep     | Aminopeptidase N                                              | 185.55            | 3        | 109651 | 2         | 1.9124E-05        | 6.87677242            | 0.005561507  | 0     | 0       | 0.0021697512 |
| P10605     | Ctsb      | Cathepsin B                                                   | 1457.13           | 63.72    | 37280  | 21        | 2.0479E-05        | 2.99719308            | 0.005561507  | 0     | 0       | 0.0021697512 |
| Q6P5F9     | Xpo1      | Exportin-1                                                    | 608.3             | 12.23    | 123093 | 10        | 2.1428E-05        | 2.73045932            | 0.005561507  | 0     | 0       | 0.0021697512 |
| Q62465     | Vat1      | Synaptic vesicle membrane protein VAT-1 homolog               | 696.42            | 37.19    | 43097  | 12        | 2.4693E-05        | 3.7232436             | 0.0057143615 | 0     | 0       | 0.0022293855 |
| P50516     | Atp6v1a   | V-type proton ATPase catalytic subunit A                      | 1703.4            | 49.43    | 68326  | 26        | 2.7492E-05        | 2.22112073            | 0.0057143615 | 0     | 0       | 0.0022293855 |
| Q99P91     | Gpnmb     | Transmembrane glycoprotein NMB                                | 156.74            | 7.67     | 63676  | 4         | 2.8021E-05        | 4.17719252            | 0.0057143615 | 0     | 0       | 0.0022293855 |
| Q9JHU4     | Dync1h1   | Cytoplasmic dynein 1 heavy chain 1                            | 4449.2            | 23.32    | 532045 | 86        | 3.5097E-05        | 2.45980167            | 0.006680107  | 0     | 0       | 0.0026061588 |
| P97429     | Anxa4     | Annexin A4                                                    | 1299.64           | 55.17    | 35916  | 18        | 4.3666E-05        | 1.68410592            | 0.0067134584 | 0     | 0       | 0.0026191704 |
| Q8BPU7     | Elmo1     | Engulfment and cell motility protein 1                        | 219.22            | 11.69    | 83936  | 6         | 4.5421E-05        | 4.46903257            | 0.0067134584 | 0     | 0       | 0.0026191704 |
| P27870     | Vav1      | Proto-oncogene vav                                            | 383.45            | 11.12    | 98137  | 8         | 4.6431E-05        | 2.60801711            | 0.0067134584 | 0     | 0       | 0.0026191704 |
| Q9WUM4     | Coro1c    | Coronin-1C                                                    | 861.13            | 36.08    | 53121  | 13        | 4.791E-05         | 1.87862627            | 0.0067134584 | 0     | 0       | 0.0026191704 |
| Q3TRM8     | Hk3       | Hexokinase-3                                                  | 1098.27           | 25.49    | 100101 | 17        | 4.8967E-05        | 3.39965898            | 0.0067134584 | 0     | 0       | 0.0026191704 |
| Q9DBC7     | Prkar1a   | cAMP-dependent protein kinase type I-alpha regulatory subunit | 449.12            | 22.57    | 43185  | 8         | 4.9381E-05        | 2.06571075            | 0.0067134584 | 0     | 0       | 0.0026191704 |
| Q8VDJ3     | Hdlbp     | Vigilin                                                       | 1815.6            | 30.21    | 141743 | 31        | 5.4272E-05        | 1.51763907            | 0.0068374393 | 0     | 0       | 0.00266754   |
| Q8BL66     | Eea1      | Early endosome antigen 1                                      | 586.06            | 10.84    | 160915 | 12        | 5.7191E-05        | 2.21606615            | 0.0068374393 | 0     | 0       | 0.00266754   |
| Q9DBG5     | Plin3     | Perilipin-3                                                   | 847.34            | 42.79    | 47262  | 13        | 5.7478E-05        | 2.69124804            | 0.0068374393 | 0     | 0       | 0.00266754   |
| Q9EQK5     | Mvp       | Major vault protein                                           | 1635.94           | 43.32    | 95924  | 27        | 6.3272E-05        | 1.83480618            | 0.0069897969 | 0     | 0       | 0.0027269804 |
| Q9CQ75     | Ndufa2    | NADH dehydrogenase [ubiquinone] 1 alpha subcomplex subunit 2  | 75.5              | 14.14    | 10916  | 1         | 6.4274E-05        | 0.54986125            | 0.0069897969 | 0     | 0       | 0.0027269804 |
| Q7TMB8     | Cyfip1    | Cytoplasmic FMR1-interacting protein 1                        | 787.81            | 14.84    | 145241 | 17        | 6.6103E-05        | 1.68397519            | 0.0069897969 | 0     | 0       | 0.0027269804 |
| Q8BVE3     | Atp6v1h   | V-type proton ATPase subunit H                                | 268.1             | 13.04    | 55855  | 5         | 7.6532E-05        | 2.39097828            | 0.0074339205 | 0     | 0       | 0.0029002495 |
| Q8VDD5     | Myh9      | Myosin-9                                                      | 7869.631          | 52.91    | 226372 | 116       | 8.1524E-05        | 2.01893545            | 0.0074339205 | 0     | 0       | 0.0029002495 |
| Q3TW96     | Uap111    | UDP-N-acetylhexosamine pyrophosphorylase-like protein 1       | 706.45            | 30.37    | 56614  | 12        | 8.1721E-05        | 2.75115883            | 0.0074339205 | 0     | 0       | 0.0029002495 |
| B2RQC6     | Cad       | CAD protein                                                   | 1068.65           | 13.98    | 243238 | 23        | 8.183E-05         | 1.93870205            | 0.0074339205 | 0     | 0       | 0.0029002495 |
| Q6I7R3     | Isoc1     | Isochorismatase domain-containing protein 1                   | 115.24            | 8.42     | 32002  | 2         | 8.3678E-05        | 2.72746043            | 0.0074339205 | 0     | 0       | 0.0029002495 |
| P26039     | Tln1      | Talin-1                                                       | 6208.992          | 49.82    | 269821 | 91        | 8.5926E-05        | 1.73523073            | 0.0074339205 | 0     | 0       | 0.0029002495 |
| Q9D4H8     | Cul2      | Cullin-2                                                      | 49.27             | 1.74     | 86877  | 1         | 9.065E-05         | 8.85064584            | 0.0074996089 | 0     | 0       | 0.002925877  |
| Q91VR5     | Ddx1      | ATP-dependent RNA helicase DDX1                               | 905.19            | 31.76    | 82500  | 16        | 9.4088E-05        | 2.04795075            | 0.0074996089 | 0     | 0       | 0.002925877  |
| P62320     | Snrpd3    | Small nuclear ribonucleoprotein Sm D3                         | 385.4             | 54.76    | 13916  | 7         | 9.4566E-05        | 0.53433226            | 0.0074996089 | 0     | 0       | 0.002925877  |
| Q9R0P3     | Esd       | S-formylglutathione hydrolase                                 | 950.34            | 68.44    | 31320  | 14        | 0.00010263        | 2.05259751            | 0.007759221  | 0     | 0       | 0.0030271614 |
| P85972     | Vcl       | Vinculin                                                      | 822.95            | 16.79    | 116615 | 16        | 0.00010328        | 3.44406623            | 0.007759221  | 0     | 0       | 0.0030271614 |
| Q6R5N8     | Tlr13     | Toll-like receptor 13                                         | 197.08            | 5.95     | 114443 | 4         | 0.00010883        | 4.14932128            | 0.0078343085 | 0     | 0       | 0.0030564558 |
| Q3UMU9     | Hdgf12    | Hepatoma-derived growth factor-related protein 2              | 64.15             | 1.35     | 74291  | 1         | 0.00011114        | 0.10374275            | 0.0078343085 | 0     | 0       | 0.0030564558 |

|        |          |                                                                            |         |       |        |    |            |            |              |   |   |              |
|--------|----------|----------------------------------------------------------------------------|---------|-------|--------|----|------------|------------|--------------|---|---|--------------|
| Q6NZJ6 | Eif4g1   | Eukaryotic translation initiation factor 4 gamma 1                         | 1620.48 | 22.81 | 176077 | 29 | 0.00011251 | 1.81216439 | 0.0078343085 | 0 | 0 | 0.0030564558 |
| Q9CZD3 | Gars     | Glycine--tRNA ligase                                                       | 1137.19 | 32.92 | 81878  | 21 | 0.00012623 | 2.10603807 | 0.0085696469 | 0 | 0 | 0.0033433388 |
| Q05816 | Fabp5    | Fatty acid-binding protein 5                                               | 1148.5  | 80    | 15137  | 16 | 0.00012907 | 3.1508602  | 0.0085696469 | 0 | 0 | 0.0033433388 |
| Q5BJQ2 | Mindy1   | Ubiquitin carboxyl-terminal hydrolase MINDY-1                              | 48      | 2.07  | 52729  | 1  | 0.0001436  | 3.29930869 | 0.0089633865 | 0 | 0 | 0.0034969512 |
| Q99N69 | Lpxn     | Leupaxin                                                                   | 263.87  | 17.88 | 43478  | 6  | 0.00014668 | 2.97384308 | 0.0089633865 | 0 | 0 | 0.0034969512 |
| Q8BYW1 | Arhgap25 | Rho GTPase-activating protein 25                                           | 332.92  | 13.12 | 73383  | 6  | 0.00015009 | 3.38556248 | 0.0089633865 | 0 | 0 | 0.0034969512 |
| Q00519 | Xdh      | Xanthine dehydrogenase/oxidase                                             | 738.76  | 15.43 | 146562 | 13 | 0.00015012 | 3.23680502 | 0.0089633865 | 0 | 0 | 0.0034969512 |
| Q9D8T2 | Gsdmcd1  | Gasdermin-D                                                                | 125.87  | 7.19  | 53238  | 3  | 0.00015122 | 2.43426786 | 0.0089633865 | 0 | 0 | 0.0034969512 |
| Q5XI32 | Capzb    | F-actin-capping protein subunit beta                                       | 1198.29 | 56.62 | 30629  | 19 | 0.00015666 | 1.88935219 | 0.0089633865 | 0 | 0 | 0.0034969512 |
| Q6VN19 | Ranbp10  | Ran-binding protein 10                                                     | 143.56  | 4.19  | 67188  | 2  | 0.00015698 | 5.23600053 | 0.0089633865 | 0 | 0 | 0.0034969512 |
| Q8BMJ2 | Lars     | Leucine--tRNA ligase, cytoplasmic                                          | 1136.64 | 23.6  | 134192 | 22 | 0.00017002 | 2.31277818 | 0.0093514692 | 0 | 0 | 0.0036483568 |
| Q71LX4 | Tln2     | Talin-2                                                                    | 594.96  | 3.75  | 253621 | 10 | 0.00017292 | 1.89105696 | 0.0093514692 | 0 | 0 | 0.0036483568 |
| P34960 | Mmp12    | Macrophage metalloelastase                                                 | 47.02   | 1.69  | 54971  | 1  | 0.0001736  | 9.00525028 | 0.0093514692 | 0 | 0 | 0.0036483568 |
| Q58A65 | Spag9    | C-Jun-amino-terminal kinase-interacting protein 4                          | 117.93  | 2.8   | 146219 | 3  | 0.00017977 | 3.06330828 | 0.0094947373 | 0 | 0 | 0.003704251  |
| P27546 | Map4     | Microtubule-associated protein 4                                           | 602.92  | 22.04 | 117429 | 15 | 0.00018291 | 1.89489099 | 0.0094947373 | 0 | 0 | 0.003704251  |
| P56399 | Usp5     | Ubiquitin carboxyl-terminal hydrolase 5                                    | 1049.75 | 30.42 | 95833  | 19 | 0.00019166 | 1.6269215  | 0.0097711782 | 0 | 0 | 0.0038121009 |
| O70325 | Gpx4     | Phospholipid hydroperoxide glutathione peroxidase                          | 95.59   | 11.68 | 22229  | 2  | 0.00020075 | 2.7238284  | 0.0098367365 | 0 | 0 | 0.0038376777 |
| E9PVA8 | Gcn1     | eIF-2-alpha kinase activator GCN1                                          | 214.6   | 2.47  | 293021 | 6  | 0.00020474 | 4.07370519 | 0.0098367365 | 0 | 0 | 0.0038376777 |
| P23116 | Eif3a    | Eukaryotic translation initiation factor 3 subunit A                       | 910.71  | 14.21 | 161936 | 19 | 0.00020487 | 2.20640573 | 0.0098367365 | 0 | 0 | 0.0038376777 |
| P23198 | Cbx3     | Chromobox protein homolog 3                                                | 704.38  | 36.61 | 20855  | 10 | 0.00020673 | 0.59540188 | 0.0098367365 | 0 | 0 | 0.0038376777 |
| Q69ZK0 | Prex1    | Phosphatidylinositol 3,4,5-trisphosphate-dependent Rac exchanger 1 protein | 571.72  | 11.03 | 184935 | 13 | 0.00022379 | 2.74857743 | 0.010367922  | 0 | 0 | 0.0040449131 |
| P81799 | Nagk     | N-acetyl-D-glucosamine kinase                                              | 56.74   | 2.92  | 37196  | 1  | 0.00022515 | 5.63744467 | 0.010367922  | 0 | 0 | 0.0040449131 |
| O08638 | Myh11    | Myosin-11                                                                  | 590.56  | 5.48  | 227028 | 11 | 0.00022951 | 1.91686222 | 0.010400731  | 0 | 0 | 0.0040577129 |
| Q6URW6 | Myh14    | Myosin-14                                                                  | 471.68  | 4.1   | 228586 | 9  | 0.00023434 | 1.91347792 | 0.010453706  | 0 | 0 | 0.0040783805 |
| O08547 | Sec22b   | Vesicle-trafficking protein SEC22b                                         | 539.67  | 43.72 | 24741  | 9  | 0.00024022 | 1.22211997 | 0.010514513  | 0 | 0 | 0.0041021035 |
| P50399 | Gdi2     | Rab GDP dissociation inhibitor beta                                        | 1995.58 | 69.89 | 50537  | 34 | 0.00024548 | 2.33538928 | 0.010514513  | 0 | 0 | 0.0041021035 |
| Q9QXK3 | Copg2    | Coatomer subunit gamma-2                                                   | 486.4   | 11.14 | 97681  | 8  | 0.00024675 | 2.04776473 | 0.010514513  | 0 | 0 | 0.0041021035 |
| P05132 | Prkaca   | cAMP-dependent protein kinase catalytic subunit alpha                      | 277.34  | 16.24 | 40571  | 5  | 0.00025125 | 3.02003462 | 0.010516437  | 0 | 0 | 0.004102854  |
| P46471 | Psmc2    | 26S proteasome regulatory subunit 7                                        | 958.45  | 38.11 | 48648  | 16 | 0.00025416 | 1.51080579 | 0.010516437  | 0 | 0 | 0.004102854  |
| Q8R491 | Ehd3     | EH domain-containing protein 3                                             | 345.1   | 13.08 | 60791  | 7  | 0.0002678  | 3.0120143  | 0.010875354  | 0 | 0 | 0.0042428812 |
| O08529 | Capn2    | Calpain-2 catalytic subunit                                                | 209.94  | 9.43  | 79872  | 5  | 0.00027046 | 3.32485605 | 0.010875354  | 0 | 0 | 0.0042428812 |
| P31996 | Cd68     | Macrosialin                                                                | 125.97  | 8.9   | 34818  | 3  | 0.00027466 | 1.97812635 | 0.010890878  | 0 | 0 | 0.0042489377 |
| F1LMZ8 | Psm11    | 26S proteasome non-ATPase regulatory subunit 11                            | 740.08  | 34.36 | 47464  | 14 | 0.00030949 | 1.76065757 | 0.011430127  | 0 | 0 | 0.0044593186 |
| P17426 | Ap2a1    | AP-2 complex subunit alpha-1                                               | 767.87  | 23.64 | 107664 | 16 | 0.0003118  | 2.09400527 | 0.011430127  | 0 | 0 | 0.0044593186 |
| Q8VCN5 | Cth      | Cystathionine gamma-lyase                                                  | 407.83  | 22.61 | 43567  | 7  | 0.00031213 | 2.50249452 | 0.011430127  | 0 | 0 | 0.0044593186 |
| Q924C1 | Xpo5     | Exportin-5                                                                 | 293.84  | 6.64  | 136973 | 6  | 0.00031783 | 4.7852063  | 0.011430127  | 0 | 0 | 0.0044593186 |
| Q5SW19 | Cluh     | Clustered mitochondria protein homolog                                     | 186.59  | 3.88  | 148068 | 4  | 0.00031844 | 3.92483771 | 0.011430127  | 0 | 0 | 0.0044593186 |
| P28798 | Grn      | Granulins                                                                  | 729.37  | 37.18 | 63458  | 15 | 0.00031945 | 1.64649311 | 0.011430127  | 0 | 0 | 0.0044593186 |
| Q6P1B1 | Xpnpep1  | Xaa-Pro aminopeptidase 1                                                   | 556.77  | 26.32 | 69591  | 11 | 0.00032096 | 2.01432982 | 0.011430127  | 0 | 0 | 0.0044593186 |
| Q3UZ39 | Lrrfip1  | Leucine-rich repeat flightless-interacting protein 1                       | 647.42  | 24.69 | 79249  | 12 | 0.00032774 | 1.95232696 | 0.011430127  | 0 | 0 | 0.0044593186 |
| Q9JMA1 | Usp14    | Ubiquitin carboxyl-terminal hydrolase 14                                   | 1176.23 | 50.71 | 56002  | 20 | 0.00033238 | 2.14326826 | 0.011430127  | 0 | 0 | 0.0044593186 |
| Q641Z6 | Ehd1     | EH domain-containing protein 1                                             | 685.35  | 33.52 | 60603  | 13 | 0.00033326 | 2.92385195 | 0.011430127  | 0 | 0 | 0.0044593186 |
| Q8BMA6 | Srp68    | Signal recognition particle subunit SRP68                                  | 165.72  | 6.72  | 70574  | 3  | 0.00033855 | 1.88335488 | 0.011430127  | 0 | 0 | 0.0044593186 |
| Q2PQA9 | Kif5b    | Kinesin-1 heavy chain                                                      | 638.44  | 14.43 | 109531 | 10 | 0.00033976 | 2.60312509 | 0.011430127  | 0 | 0 | 0.0044593186 |
| O89023 | Tpp1     | Tripeptidyl-peptidase 1                                                    | 296.49  | 13.7  | 61342  | 5  | 0.0003403  | 2.38501797 | 0.011430127  | 0 | 0 | 0.0044593186 |
| P63081 | Atp6v0c  | V-type proton ATPase 16 kDa proteolipid subunit                            | 322.64  | 31.61 | 15808  | 5  | 0.00034887 | 2.20209311 | 0.011581788  | 0 | 0 | 0.0045184874 |

|        |          |                                                                  |         |       |        |    |            |            |             |   |   |              |
|--------|----------|------------------------------------------------------------------|---------|-------|--------|----|------------|------------|-------------|---|---|--------------|
| P62317 | Snrpd2   | Small nuclear ribonucleoprotein Sm D2                            | 359.22  | 52.54 | 13527  | 7  | 0.00036893 | 0.43743745 | 0.012106783 | 0 | 0 | 0.0047233073 |
| P62814 | Atp6v1b2 | V-type proton ATPase subunit B, brain isoform                    | 1654.45 | 68.3  | 56551  | 27 | 0.00039077 | 1.99419573 | 0.012677728 | 0 | 0 | 0.0049460545 |
| O88456 | Capns1   | Calpain small subunit 1                                          | 189.41  | 15.99 | 28463  | 3  | 0.00040932 | 1.41212425 | 0.012975039 | 0 | 0 | 0.0050620464 |
| Q920A5 | Scpep1   | Retinoid-inducible serine carboxypeptidase                       | 331.76  | 19.03 | 50965  | 7  | 0.0004099  | 2.8752249  | 0.012975039 | 0 | 0 | 0.0050620464 |
| Q9CYR6 | Pgm3     | Phosphoacetylglucosamine mutase                                  | 43.72   | 1.48  | 59453  | 1  | 0.00041357 | 6.80032891 | 0.012975039 | 0 | 0 | 0.0050620464 |
| P0C0A1 | Vps25    | Vacuolar protein-sorting-associated protein 25                   | 121.19  | 21.02 | 20762  | 3  | 0.00042836 | 1.93622525 | 0.013250681 | 0 | 0 | 0.0051695845 |
| Q5U2Z5 | Cmtr1    | Cap-specific mRNA (nucleoside-2'-O)-methyltransferase 1          | 66.09   | 1.79  | 95619  | 2  | 0.00043544 | 5.22590944 | 0.013250681 | 0 | 0 | 0.0051695845 |
| Q91YL3 | Uck1l    | Uridine-cytidine kinase-like 1                                   | 82.25   | 3.28  | 60842  | 2  | 0.00043627 | 4.9255624  | 0.013250681 | 0 | 0 | 0.0051695845 |
| P28658 | Atxn10   | Ataxin-10                                                        | 477.58  | 22.11 | 53707  | 8  | 0.00044372 | 3.58671612 | 0.013334834 | 0 | 0 | 0.0052024158 |
| Q60854 | Serpinb6 | Serpin B6                                                        | 986.41  | 53.17 | 42599  | 15 | 0.00046006 | 2.60329287 | 0.013578514 | 0 | 0 | 0.0052974846 |
| Q9WTP7 | Ak3      | GTP:AMP phosphotransferase AK3, mitochondrial                    | 259.55  | 31.72 | 25426  | 4  | 0.00046134 | 3.13276516 | 0.013578514 | 0 | 0 | 0.0052974846 |
| Q99JF8 | Psip1    | PC4 and SFRS1-interacting protein                                | 373.52  | 17.23 | 59697  | 7  | 0.00047579 | 0.72216714 | 0.013861143 | 0 | 0 | 0.0054077485 |
| P70248 | Myo1f    | Unconventional myosin-I f                                        | 294.48  | 6.01  | 125947 | 7  | 0.00048511 | 2.78274901 | 0.013864949 | 0 | 0 | 0.0054092335 |
| Q91YR9 | Ptgr1    | Prostaglandin reductase 1                                        | 402.74  | 27.36 | 35560  | 8  | 0.00049085 | 2.60948212 | 0.013864949 | 0 | 0 | 0.0054092335 |
| Q9WU78 | Pcded6ip | Programmed cell death 6-interacting protein                      | 1129.38 | 31.07 | 96024  | 17 | 0.00049183 | 1.77795819 | 0.013864949 | 0 | 0 | 0.0054092335 |
| P50396 | Gdi1     | Rab GDP dissociation inhibitor alpha                             | 467.39  | 18.79 | 50522  | 8  | 0.00049535 | 2.05097132 | 0.013864949 | 0 | 0 | 0.0054092335 |
| Q9JH6  | Akr1a1   | Alcohol dehydrogenase [NADP(+)]                                  | 505.73  | 30.15 | 36587  | 10 | 0.00052825 | 2.8175904  | 0.014401276 | 0 | 0 | 0.0056184748 |
| Q8BML9 | Qars     | Glutamine--tRNA ligase                                           | 806.47  | 29.68 | 87677  | 18 | 0.00053185 | 2.09690338 | 0.014401276 | 0 | 0 | 0.0056184748 |
| P68181 | Prkacb   | cAMP-dependent protein kinase catalytic subunit beta             | 261.26  | 16.24 | 40708  | 5  | 0.00053281 | 3.1200536  | 0.014401276 | 0 | 0 | 0.0056184748 |
| P05201 | Got1     | Aspartate aminotransferase, cytoplasmic                          | 924.57  | 44.79 | 46248  | 16 | 0.00053469 | 2.13319128 | 0.014401276 | 0 | 0 | 0.0056184748 |
| Q03963 | Eif2ak2  | Interferon-induced, double-stranded RNA-activated protein kinase | 382.11  | 19.81 | 58280  | 6  | 0.00054222 | 1.97793363 | 0.014436778 | 0 | 0 | 0.0056323253 |
| Q9Z0H1 | Wdr46    | WD repeat-containing protein 46                                  | 425.78  | 22.19 | 69048  | 9  | 0.00054612 | 0.54431664 | 0.014436778 | 0 | 0 | 0.0056323253 |
| Q9JMH6 | Txnrd1   | Thioredoxin reductase 1, cytoplasmic                             | 1055.88 | 42.09 | 67084  | 15 | 0.00057595 | 2.31336997 | 0.015085733 | 0 | 0 | 0.0058855068 |
| Q8BPX9 | Slc15a3  | Solute carrier family 15 member 3                                | 360.59  | 14.36 | 64051  | 7  | 0.00059055 | 1.8663886  | 0.015095976 | 0 | 0 | 0.0058895031 |
| Q9ES97 | Rtn3     | Reticulon-3                                                      | 122.99  | 4.98  | 103879 | 2  | 0.00059138 | 1.96933003 | 0.015095976 | 0 | 0 | 0.0058895031 |
| Q68FD5 | Cltc     | Clathrin heavy chain 1                                           | 4125.47 | 48.42 | 191557 | 66 | 0.00059639 | 1.74239566 | 0.015095976 | 0 | 0 | 0.0058895031 |
| O08539 | Bin1     | Myc box-dependent-interacting protein 1                          | 257.22  | 14.12 | 64470  | 5  | 0.00059749 | 1.70426064 | 0.015095976 | 0 | 0 | 0.0058895031 |
| A2ADY9 | Ddi2     | Protein DDI1 homolog 2                                           | 353.19  | 24.56 | 44591  | 6  | 0.00064378 | 2.90977371 | 0.01582029  | 0 | 0 | 0.0061720849 |
| Q62261 | Sptbn1   | Spectrin beta chain, non-erythrocytic 1                          | 49.45   | 0.38  | 274223 | 1  | 0.00064678 | 6.6550757  | 0.01582029  | 0 | 0 | 0.0061720849 |
| Q93092 | Taldo1   | Transaldolase                                                    | 1283.64 | 52.82 | 37387  | 25 | 0.00064701 | 1.91553394 | 0.01582029  | 0 | 0 | 0.0061720849 |
| Q9QXB9 | Drp2     | Developmentally-regulated GTP-binding protein 2                  | 211.09  | 12.09 | 40718  | 4  | 0.00065295 | 2.28961486 | 0.01582029  | 0 | 0 | 0.0061720849 |
| Q6P542 | Abcf1    | ATP-binding cassette sub-family F member 1                       | 418.04  | 13.62 | 94945  | 8  | 0.00065387 | 1.71896806 | 0.01582029  | 0 | 0 | 0.0061720849 |
| P45377 | Akr1b8   | Aldose reductase-related protein 2                               | 863.46  | 55.7  | 36121  | 15 | 0.00067304 | 1.81505391 | 0.015872283 | 0 | 0 | 0.0061923693 |
| P53534 | Pygb     | Glycogen phosphorylase, brain form                               | 585.22  | 16.71 | 96174  | 10 | 0.00067332 | 2.75619703 | 0.015872283 | 0 | 0 | 0.0061923693 |
| Q99LC8 | Eif2b1   | Translation initiation factor eIF-2B subunit alpha               | 98.49   | 5.57  | 33816  | 1  | 0.00067676 | 4.59845736 | 0.015872283 | 0 | 0 | 0.0061923693 |
| Q8BGQ7 | Aars     | Alanine--tRNA ligase, cytoplasmic                                | 1526.94 | 40.19 | 106909 | 26 | 0.00068751 | 1.99182707 | 0.015872283 | 0 | 0 | 0.0061923693 |
| O35604 | Npc1     | NPC intracellular cholesterol transporter 1                      | 57.72   | 0.94  | 142885 | 1  | 0.00068937 | 2.86849964 | 0.015872283 | 0 | 0 | 0.0061923693 |
| Q8CG72 | Adprhl2  | Poly(ADP-ribose) glycohydrolase ARH3                             | 121.31  | 10.54 | 39414  | 3  | 0.00068937 | 5.5573858  | 0.015872283 | 0 | 0 | 0.0061923693 |
| Q62192 | Cd180    | CD180 antigen                                                    | 200.21  | 6.96  | 74302  | 3  | 0.00070231 | 3.62070511 | 0.016040813 | 0 | 0 | 0.0062581192 |
| Q99MZ7 | Pecr     | Peroxisomal trans-2-enoyl-CoA reductase                          | 118.11  | 7.92  | 32410  | 2  | 0.00071807 | 1.87314676 | 0.016270655 | 0 | 0 | 0.0063477892 |
| Q9EQH3 | Vps35    | Vacuolar protein sorting-associated protein 35                   | 641.53  | 19.35 | 91713  | 10 | 0.00073203 | 2.7409542  | 0.016456168 | 0 | 0 | 0.0064201647 |
| Q9Z1T1 | Ap3b1    | AP-3 complex subunit beta-1                                      | 60.43   | 1.72  | 122740 | 2  | 0.00074245 | 3.663269   | 0.016461606 | 0 | 0 | 0.0064222863 |
| Q4V8K5 | Brox     | BRO1 domain-containing protein BROX                              | 163.76  | 9.25  | 46192  | 3  | 0.00075232 | 4.95902496 | 0.016461606 | 0 | 0 | 0.0064222863 |
| P86182 | Ccdc22   | Coiled-coil domain-containing protein 22                         | 83.65   | 4.31  | 70855  | 2  | 0.00075468 | 3.89656577 | 0.016461606 | 0 | 0 | 0.0064222863 |
| Q61686 | Cbx5     | Chromobox protein homolog 5                                      | 248.3   | 26.18 | 22186  | 5  | 0.00075623 | 0.57360415 | 0.016461606 | 0 | 0 | 0.0064222863 |

|        |          |                                                          |         |       |        |    |            |            |             |   |   |              |
|--------|----------|----------------------------------------------------------|---------|-------|--------|----|------------|------------|-------------|---|---|--------------|
| P11352 | Gpx1     | Glutathione peroxidase 1                                 | 119.38  | 15.92 | 22329  | 3  | 0.00076475 | 4.23718494 | 0.016461606 | 0 | 0 | 0.0064222863 |
| Q9D1A2 | Cndp2    | Cytosolic non-specific dipeptidase                       | 693.95  | 35.37 | 52767  | 13 | 0.00076686 | 2.58556017 | 0.016461606 | 0 | 0 | 0.0064222863 |
| Q9DC61 | Pmpca    | Mitochondrial-processing peptidase subunit alpha         | 190.19  | 12.79 | 58279  | 4  | 0.0007781  | 1.88690031 | 0.01657819  | 0 | 0 | 0.0064677699 |
| P62329 | Tmsb4x   | Thymosin beta-4                                          | 241.93  | 68.18 | 5053   | 4  | 0.00079647 | 2.2575374  | 0.016763531 | 0 | 0 | 0.0065400784 |
| A2AAY5 | Sh3pxd2b | SH3 and PX domain-containing protein 2B                  | 186.02  | 4.74  | 101517 | 5  | 0.00079854 | 2.213445   | 0.016763531 | 0 | 0 | 0.0065400784 |
| P31750 | Akt1     | RAC-alpha serine/threonine-protein kinase                | 48.16   | 1.67  | 55707  | 1  | 0.00081614 | 3.25913108 | 0.016772827 | 0 | 0 | 0.0065437051 |
| Q99JI4 | Psmc6    | 26S proteasome non-ATPase regulatory subunit 6           | 490.5   | 28.79 | 45536  | 10 | 0.00081689 | 2.05218475 | 0.016772827 | 0 | 0 | 0.0065437051 |
| P54822 | Adsl     | Adenylosuccinate lyase                                   | 755.65  | 37.4  | 54866  | 12 | 0.00081981 | 1.95364977 | 0.016772827 | 0 | 0 | 0.0065437051 |
| Q62407 | Speg     | Striated muscle-specific serine/threonine-protein kinase | 37.63   | 0.43  | 354343 | 1  | 0.00082564 | 128888.64  | 0.016772827 | 0 | 0 | 0.0065437051 |
| P42208 | Sept2    | Septin-2                                                 | 584.36  | 35.73 | 41526  | 9  | 0.00083271 | 1.52465065 | 0.016772827 | 0 | 0 | 0.0065437051 |
| P48036 | Anxa5    | Annexin A5                                               | 1600.34 | 69.91 | 35752  | 25 | 0.00085079 | 1.85406963 | 0.016772827 | 0 | 0 | 0.0065437051 |
| Q04899 | Cdk18    | Cyclin-dependent kinase 18                               | 160.51  | 8.87  | 51848  | 3  | 0.00085551 | 3.45216177 | 0.016772827 | 0 | 0 | 0.0065437051 |
| Q80UM3 | Naa15    | N-alpha-acetyltransferase 15, NatA auxiliary subunit     | 438.56  | 14.1  | 100961 | 9  | 0.00085638 | 2.83885822 | 0.016772827 | 0 | 0 | 0.0065437051 |
| P17427 | Ap2a2    | AP-2 complex subunit alpha-2                             | 568.12  | 15.46 | 104017 | 11 | 0.0008633  | 2.23079091 | 0.016772827 | 0 | 0 | 0.0065437051 |
| Q91V17 | Rnh1     | Ribonuclease inhibitor                                   | 2016.51 | 74.78 | 49816  | 24 | 0.00086427 | 2.99091945 | 0.016772827 | 0 | 0 | 0.0065437051 |
| Q8K2Z4 | Ncapd2   | Condensin complex subunit 1                              | 266.42  | 6.03  | 155665 | 6  | 0.00086854 | 2.5805551  | 0.016772827 | 0 | 0 | 0.0065437051 |
| Q9R0N0 | Galk1    | Galactokinase                                            | 443.6   | 24.49 | 42295  | 9  | 0.00086948 | 2.79198867 | 0.016772827 | 0 | 0 | 0.0065437051 |
| Q8BMD8 | Slc25a24 | Calcium-binding mitochondrial carrier protein SCaMC-1    | 381.77  | 27.37 | 52902  | 8  | 0.00088194 | 1.50571302 | 0.016898858 | 0 | 0 | 0.0065928744 |
| O08739 | Ampd3    | AMP deaminase 3                                          | 42.12   | 0.91  | 88652  | 1  | 0.00089072 | 5.03781335 | 0.016953286 | 0 | 0 | 0.0066141091 |
| Q9Z1Q9 | Vars     | Valine--tRNA ligase                                      | 2117.74 | 37.53 | 140215 | 37 | 0.00090304 | 1.76970927 | 0.016990111 | 0 | 0 | 0.0066284759 |
| Q68FH4 | Galk2    | N-acetylgalactosamine kinase                             | 108.72  | 5.02  | 50503  | 2  | 0.00091134 | 2.83970106 | 0.016990111 | 0 | 0 | 0.0066284759 |
| Q8JZK9 | Hmgcs1   | Hydroxymethylglutaryl-CoA synthase, cytoplasmic          | 388.81  | 21.54 | 57569  | 7  | 0.00091295 | 2.9756654  | 0.016990111 | 0 | 0 | 0.0066284759 |
| Q8K1B8 | Fermt3   | Fermitin family homolog 3                                | 1259.78 | 48.27 | 75635  | 23 | 0.00092504 | 1.58681723 | 0.016990111 | 0 | 0 | 0.0066284759 |
| Q8BU30 | Iars     | Isoleucine--tRNA ligase, cytoplasmic                     | 391.51  | 7.21  | 144271 | 8  | 0.00092738 | 2.9502803  | 0.016990111 | 0 | 0 | 0.0066284759 |
| Q920Q4 | Vps16    | Vacuolar protein sorting-associated protein 16 homolog   | 165.2   | 6.2   | 94928  | 3  | 0.00092836 | 3.20800462 | 0.016990111 | 0 | 0 | 0.0066284759 |
| P49962 | Srp9     | Signal recognition particle 9 kDa protein                | 44.99   | 12.79 | 10194  | 1  | 0.00094136 | 5.60311029 | 0.017011312 | 0 | 0 | 0.0066367469 |
| Q6ZQ08 | Cnot1    | CCR4-NOT transcription complex subunit 1                 | 124.51  | 1.22  | 266808 | 3  | 0.00094143 | 3.14599573 | 0.017011312 | 0 | 0 | 0.0066367469 |
| Q6P5H2 | Nes      | Nestin                                                   | 2852.46 | 35.3  | 207124 | 39 | 0.00096645 | 1.78401186 | 0.017103602 | 0 | 0 | 0.0066727528 |
| P83953 | Kpna1    | Importin subunit alpha-5                                 | 184.16  | 7.99  | 60137  | 3  | 0.0009681  | 2.76113935 | 0.017103602 | 0 | 0 | 0.0066727528 |
| Q9WUA3 | Pfkp     | ATP-dependent 6-phosphofructokinase, platelet type       | 1615    | 44.9  | 85455  | 23 | 0.00097149 | 2.02539639 | 0.017103602 | 0 | 0 | 0.0066727528 |
| P46664 | Adss     | Adenylosuccinate synthetase isozyme 2                    | 769.26  | 35.31 | 50021  | 13 | 0.00097788 | 2.10418493 | 0.017103602 | 0 | 0 | 0.0066727528 |
| P17136 | Snrpb    | Small nuclear ribonucleoprotein-associated protein B     | 304.71  | 19.48 | 23656  | 6  | 0.00098075 | 0.5813711  | 0.017103602 | 0 | 0 | 0.0066727528 |
| Q8BP47 | Nars     | Asparagine--tRNA ligase, cytoplasmic                     | 784.23  | 27.55 | 64279  | 15 | 0.00099317 | 1.84823643 | 0.017103602 | 0 | 0 | 0.0066727528 |
| O54783 | Chkb     | Choline/ethanolamine kinase                              | 56.35   | 5.33  | 45100  | 1  | 0.00099418 | 5.16189275 | 0.017103602 | 0 | 0 | 0.0066727528 |
| P10107 | Anxa1    | Annexin A1                                               | 1643.03 | 68.21 | 38734  | 26 | 0.00100283 | 1.52869975 | 0.017103602 | 0 | 0 | 0.0066727528 |
| Q9Z1G3 | Atp6v1c1 | V-type proton ATPase subunit C 1                         | 516.22  | 26.18 | 43888  | 9  | 0.00100687 | 3.77436925 | 0.017103602 | 0 | 0 | 0.0066727528 |
| Q5PPK9 | Eipr1    | EARP and GARP complex-interacting protein 1              | 38.64   | 3.37  | 43157  | 1  | 0.00101954 | 21.816255  | 0.017103602 | 0 | 0 | 0.0066727528 |
| Q8BKC5 | Ipo5     | Importin-5                                               | 778.2   | 19.05 | 123591 | 14 | 0.00103119 | 2.29716036 | 0.017103602 | 0 | 0 | 0.0066727528 |
| Q8CHM7 | Hac1     | 2-hydroxyacyl-CoA lyase 1                                | 35.49   | 1.38  | 63616  | 1  | 0.00103131 | 114423.065 | 0.017103602 | 0 | 0 | 0.0066727528 |
| Q8C2E7 | Washc5   | WASH complex subunit 5                                   | 55.02   | 0.95  | 134110 | 1  | 0.0010324  | 3.23950227 | 0.017103602 | 0 | 0 | 0.0066727528 |
| P51146 | Rab4b    | Ras-related protein Rab-4B                               | 197.1   | 18.78 | 23629  | 3  | 0.00103523 | 2.37296763 | 0.017103602 | 0 | 0 | 0.0066727528 |



|        |         |                                                                       |         |       |        |    |            |            |             |   |   |              |
|--------|---------|-----------------------------------------------------------------------|---------|-------|--------|----|------------|------------|-------------|---|---|--------------|
| Q80WS3 | Fbll1   | rRNA/tRNA 2'-O-methyltransferase fibrillar-like protein 1             | 157.08  | 11.46 | 33339  | 3  | 0.0010364  | 0.41582344 | 0.017103602 | 0 | 0 | 0.0066727528 |
| P47856 | Gfpt1   | Glutamine--fructose-6-phosphate aminotransferase [isomerizing] 1      | 162.85  | 5.02  | 78539  | 3  | 0.00106375 | 4.29294658 | 0.017454025 | 0 | 0 | 0.0068094659 |
| Q9JLT4 | Txnrd2  | Thioredoxin reductase 2, mitochondrial                                | 176.76  | 5.15  | 56603  | 2  | 0.00107655 | 2.67792653 | 0.017496641 | 0 | 0 | 0.0068260918 |
| Q60866 | Pter    | Phosphotriesterase-related protein                                    | 149.41  | 11.75 | 39218  | 3  | 0.00107942 | 2.46095071 | 0.017496641 | 0 | 0 | 0.0068260918 |
| P62278 | Rps13   | 40S ribosomal protein S13                                             | 404.73  | 43.71 | 17222  | 8  | 0.00108896 | 2.49418337 | 0.017496641 | 0 | 0 | 0.0068260918 |
| Q9JKB3 | Ybx3    | Y-box-binding protein 3                                               | 525.42  | 26.87 | 38814  | 7  | 0.00109086 | 1.9018808  | 0.017496641 | 0 | 0 | 0.0068260918 |
| O88342 | Wdr1    | WD repeat-containing protein 1                                        | 1345.48 | 49.83 | 66407  | 20 | 0.00109779 | 2.06149052 | 0.017509365 | 0 | 0 | 0.0068310559 |
| Q91V92 | Acly    | ATP-citrate synthase                                                  | 1852.34 | 31.35 | 119728 | 28 | 0.00111092 | 1.94343303 | 0.017588866 | 0 | 0 | 0.0068620725 |
| P51855 | Gss     | Glutathione synthetase                                                | 236.54  | 14.14 | 52247  | 4  | 0.00111509 | 2.0950239  | 0.017588866 | 0 | 0 | 0.0068620725 |
| Q62446 | Fkbp3   | Peptidyl-prolyl cis-trans isomerase FKBP3                             | 120.44  | 15.62 | 25148  | 3  | 0.00114635 | 2.005475   | 0.017734305 | 0 | 0 | 0.0069188136 |
| Q9CX86 | Hnrnpa0 | Heterogeneous nuclear ribonucleoprotein A0                            | 587.52  | 34.1  | 30530  | 10 | 0.00114948 | 0.53853952 | 0.017734305 | 0 | 0 | 0.0069188136 |
| P55302 | Lrpap1  | Alpha-2-macroglobulin receptor-associated protein                     | 260.71  | 15.28 | 42215  | 6  | 0.00115831 | 1.8812901  | 0.017734305 | 0 | 0 | 0.0069188136 |
| P62075 | Timm13  | Mitochondrial import inner membrane translocase subunit Tim13         | 105.98  | 14.74 | 10458  | 1  | 0.00116629 | 6.77543311 | 0.017734305 | 0 | 0 | 0.0069188136 |
| P47860 | Pfkfb   | ATP-dependent 6-phosphofructokinase, platelet type                    | 723.76  | 13.58 | 85720  | 9  | 0.00116711 | 1.96167276 | 0.017734305 | 0 | 0 | 0.0069188136 |
| Q9WVQ5 | Apip    | Methylthioribulose-1-phosphate dehydratase                            | 149.19  | 15.35 | 26949  | 3  | 0.0011709  | 3.80861917 | 0.017734305 | 0 | 0 | 0.0069188136 |
| Q8BGB7 | Enoph1  | Enolase-phosphatase E1                                                | 71.49   | 5.45  | 28600  | 2  | 0.00117496 | 2.32645953 | 0.017734305 | 0 | 0 | 0.0069188136 |
| Q8CIE6 | Copa    | Coatomer subunit alpha                                                | 1255.51 | 23.2  | 138432 | 23 | 0.00117866 | 1.80398437 | 0.017734305 | 0 | 0 | 0.0069188136 |
| Q8CGC7 | Eprs    | Bifunctional glutamate/proline--tRNA ligase                           | 2295.82 | 34.06 | 170079 | 37 | 0.00118517 | 1.52717134 | 0.017734305 | 0 | 0 | 0.0069188136 |
| Q7TPR4 | Actn1   | Alpha-actinin-1                                                       | 1152.69 | 26.46 | 103068 | 20 | 0.00118987 | 2.20513805 | 0.017734305 | 0 | 0 | 0.0069188136 |
| P31230 | Aimp1   | Aminoacyl tRNA synthase complex-interacting multifunctional protein 1 | 401.65  | 45.16 | 33997  | 8  | 0.00119817 | 1.75613977 | 0.017734305 | 0 | 0 | 0.0069188136 |
| P62994 | Grb2    | Growth factor receptor-bound protein 2                                | 92.77   | 11.06 | 25206  | 2  | 0.0012012  | 3.58477589 | 0.017734305 | 0 | 0 | 0.0069188136 |
| P83870 | Phf5a   | PHD finger-like domain-containing protein 5A                          | 325.33  | 47.27 | 12405  | 5  | 0.00120506 | 0.37018503 | 0.017734305 | 0 | 0 | 0.0069188136 |
| P68101 | Eif2s1  | Eukaryotic translation initiation factor 2 subunit 1                  | 875.77  | 56.19 | 36108  | 15 | 0.00122016 | 1.77990786 | 0.017864403 | 0 | 0 | 0.0069695698 |
| P21300 | Akr1b7  | Aldose reductase-related protein 1                                    | 337.12  | 13.92 | 35988  | 7  | 0.00124418 | 1.67543821 | 0.018123133 | 0 | 0 | 0.00707051   |
| P62334 | Psmc6   | 26S proteasome regulatory subunit 10B                                 | 593.05  | 30.85 | 44173  | 10 | 0.00125483 | 1.93117247 | 0.018185476 | 0 | 0 | 0.0070948323 |
| Q9WUU7 | Ctsz    | Cathepsin Z                                                           | 758.66  | 53.92 | 33996  | 13 | 0.00128586 | 1.46018619 | 0.018541011 | 0 | 0 | 0.0072335397 |
| P29452 | Casp1   | Caspase-1                                                             | 368.14  | 20.4  | 45640  | 7  | 0.00129632 | 2.20153931 | 0.018598009 | 0 | 0 | 0.0072557768 |
| Q9CWQ0 | Dph5    | Diphthine methyl ester synthase                                       | 74.21   | 8.19  | 31218  | 1  | 0.00132034 | 2.80664959 | 0.018847895 | 0 | 0 | 0.0073532667 |
| Q8BFR5 | Tufm    | Elongation factor Tu, mitochondrial                                   | 851.21  | 41.81 | 49508  | 15 | 0.00132962 | 1.33030249 | 0.01888594  | 0 | 0 | 0.0073681092 |
| O08553 | Dpysl2  | Dihydropyrimidinase-related protein 2                                 | 1562.05 | 53.5  | 62278  | 23 | 0.00135738 | 1.43842065 | 0.019149989 | 0 | 0 | 0.0074711248 |
| Q99KB8 | Hagh    | Hydroxyacylglutathione hydrolase, mitochondrial                       | 132.61  | 21.36 | 34084  | 4  | 0.00136163 | 2.70111852 | 0.019149989 | 0 | 0 | 0.0074711248 |
| Q91XU1 | Qki     | Protein quaking                                                       | 278.1   | 23.17 | 37643  | 5  | 0.00137872 | 1.50317479 | 0.019181444 | 0 | 0 | 0.0074833964 |
| A2AIV8 | Card9   | Caspase recruitment domain-containing protein 9                       | 50.62   | 1.87  | 62462  | 1  | 0.00137941 | 6.82213758 | 0.019181444 | 0 | 0 | 0.0074833964 |
| A1L314 | Mpeg1   | Macrophage-expressed gene 1 protein                                   | 498.09  | 19.21 | 78390  | 11 | 0.00138402 | 1.96827372 | 0.019181444 | 0 | 0 | 0.0074833964 |
| P63312 | Tmsb10  | Thymosin beta-10                                                      | 107.43  | 47.73 | 5026   | 2  | 0.00140171 | 1.6700749  | 0.019199495 | 0 | 0 | 0.0074904386 |
| Q9D0I9 | Rars    | Arginine--tRNA ligase, cytoplasmic                                    | 1329.99 | 40    | 75674  | 23 | 0.0014037  | 2.28704016 | 0.019199495 | 0 | 0 | 0.0074904386 |
| Q9D2V7 | Coro7   | Coronin-7                                                             | 438.61  | 16.49 | 100812 | 9  | 0.0014055  | 1.8068298  | 0.019199495 | 0 | 0 | 0.0074904386 |
| P26638 | Sars    | Serine--tRNA ligase, cytoplasmic                                      | 726.71  | 29.69 | 58389  | 14 | 0.00143947 | 2.23433598 | 0.019548196 | 0 | 0 | 0.0076264799 |
| O88746 | Tom1    | Target of Myb protein 1                                               | 302.76  | 17.68 | 54325  | 6  | 0.00144472 | 2.34616447 | 0.019548196 | 0 | 0 | 0.0076264799 |
| A2AGT5 | Ckap5   | Cytoskeleton-associated protein 5                                     | 457.24  | 5.81  | 225635 | 8  | 0.00148374 | 2.32080989 | 0.019981523 | 0 | 0 | 0.0077955371 |
| P21708 | Mapk3   | Mitogen-activated protein kinase 3                                    | 385.13  | 23.16 | 43081  | 9  | 0.00149636 | 2.24713392 | 0.020056863 | 0 | 0 | 0.0078249299 |
| Q91YR5 | Metll3  | Methyltransferase-like protein 13                                     | 87.05   | 3.01  | 78757  | 2  | 0.00152169 | 3.33328474 | 0.020301102 | 0 | 0 | 0.0079202169 |
| Q11011 | Npepps  | Puromycin-sensitive aminopeptidase                                    | 553.2   | 11.3  | 103325 | 10 | 0.00153296 | 2.23537255 | 0.020356264 | 0 | 0 | 0.0079417377 |
| P61314 | Rpl15   | 60S ribosomal protein L15                                             | 571.13  | 48.04 | 24146  | 10 | 0.00154871 | 0.69380028 | 0.020470226 | 0 | 0 | 0.0079861984 |

|        |          |                                                                                   |         |       |        |    |            |            |             |   |   |              |
|--------|----------|-----------------------------------------------------------------------------------|---------|-------|--------|----|------------|------------|-------------|---|---|--------------|
| Q9D906 | Atg7     | Ubiquitin-like modifier-activating enzyme ATG7                                    | 277.77  | 13.47 | 77520  | 7  | 0.00155614 | 2.74976396 | 0.020473622 | 0 | 0 | 0.0079875232 |
| P26645 | Marcks   | Myristoylated alanine-rich C-kinase substrate                                     | 158.86  | 18.77 | 29661  | 4  | 0.00158242 | 2.1529555  | 0.020646357 | 0 | 0 | 0.0080549136 |
| P61161 | Actr2    | Actin-related protein 2                                                           | 1206.3  | 46.7  | 44761  | 18 | 0.00158373 | 2.06217535 | 0.020646357 | 0 | 0 | 0.0080549136 |
| Q8K1X4 | Nckap11  | Nck-associated protein 1-like                                                     | 521.71  | 11.11 | 128905 | 10 | 0.00161569 | 1.84236785 | 0.020967258 | 0 | 0 | 0.0081801089 |
| P70168 | Kpnb1    | Importin subunit beta-1                                                           | 895.81  | 21.92 | 97184  | 16 | 0.00163427 | 1.57888795 | 0.021112383 | 0 | 0 | 0.0082367278 |
| Q62698 | Dync1li2 | Cytoplasmic dynein 1 light intermediate chain 2                                   | 284.19  | 13.08 | 54745  | 5  | 0.00165954 | 1.93592489 | 0.021303219 | 0 | 0 | 0.0083111798 |
| O35639 | Anxa3    | Annexin A3                                                                        | 1492.23 | 53.25 | 36384  | 23 | 0.00166396 | 1.64168458 | 0.021303219 | 0 | 0 | 0.0083111798 |
| Q8BK64 | Ahsa1    | Activator of 90 kDa heat shock protein ATPase homolog 1                           | 230.53  | 21.6  | 38117  | 6  | 0.0016784  | 2.03269591 | 0.021392148 | 0 | 0 | 0.0083458744 |
| O54747 | Pold1    | DNA polymerase delta catalytic subunit                                            | 298.75  | 6.26  | 123601 | 7  | 0.00171009 | 2.23122762 | 0.0216992   | 0 | 0 | 0.0084656671 |
| P62843 | Rps15    | 40S ribosomal protein S15                                                         | 323.18  | 39.31 | 17040  | 5  | 0.00174931 | 2.65549357 | 0.022009319 | 0 | 0 | 0.0085866557 |
| Q61510 | Trim25   | E3 ubiquitin/ISG15 ligase TRIM25                                                  | 236.25  | 8.68  | 71726  | 4  | 0.00174995 | 3.05808393 | 0.022009319 | 0 | 0 | 0.0085866557 |
| P23591 | Tsta3    | GDP-L-fucose synthase                                                             | 206.47  | 14.02 | 35878  | 4  | 0.00176699 | 3.82543624 | 0.022126168 | 0 | 0 | 0.0086322431 |
| Q8BJY1 | Psmc5    | 26S proteasome non-ATPase regulatory subunit 5                                    | 296.7   | 19.64 | 55972  | 7  | 0.0018005  | 3.19524591 | 0.022384943 | 0 | 0 | 0.0087332008 |
| P01897 | H2-L     | H-2 class I histocompatibility antigen, L-D alpha chain                           | 177.68  | 13.81 | 40711  | 4  | 0.00180334 | 1.77200512 | 0.022384943 | 0 | 0 | 0.0087332008 |
| Q61749 | Eif2b4   | Translation initiation factor eIF-2B subunit delta                                | 211.27  | 9.92  | 57624  | 4  | 0.00183948 | 2.18878752 | 0.022734641 | 0 | 0 | 0.0088696309 |
| Q80TM9 | Nisch    | Nischarin                                                                         | 244.24  | 3.45  | 175012 | 4  | 0.00185063 | 2.5337194  | 0.02277389  | 0 | 0 | 0.0088849435 |
| Q99JX4 | Eif3m    | Eukaryotic translation initiation factor 3 subunit M                              | 513.85  | 28.61 | 42517  | 7  | 0.00186623 | 2.05054997 | 0.022796848 | 0 | 0 | 0.0088939002 |
| P35444 | Comp     | Cartilage oligomeric matrix protein                                               | 38.6    | 1.06  | 82664  | 1  | 0.00187529 | 4.27022256 | 0.022796848 | 0 | 0 | 0.0088939002 |
| P17918 | Pcna     | Proliferating cell nuclear antigen                                                | 1734.93 | 66.67 | 28785  | 22 | 0.00187895 | 1.56623597 | 0.022796848 | 0 | 0 | 0.0088939002 |
| Q58NB6 | Dhrs9    | Dehydrogenase/reductase SDR family member 9                                       | 52.71   | 3.76  | 35242  | 1  | 0.00188443 | 3.87583856 | 0.022796848 | 0 | 0 | 0.0088939002 |
| Q8BSY0 | Asph     | Aspartyl/asparaginyl beta-hydroxylase                                             | 643.15  | 24.83 | 83042  | 14 | 0.00189478 | 1.39872833 | 0.022812956 | 0 | 0 | 0.0089001847 |
| Q61879 | Myh10    | Myosin-10                                                                         | 1022.24 | 10.12 | 228996 | 19 | 0.00190762 | 1.97697627 | 0.022812956 | 0 | 0 | 0.0089001847 |
| Q53UA7 | Taok3    | Serine/threonine-protein kinase TAO3                                              | 164.73  | 5.01  | 105474 | 4  | 0.00191131 | 1.61005469 | 0.022812956 | 0 | 0 | 0.0089001847 |
| Q9D8W5 | Psmc12   | 26S proteasome non-ATPase regulatory subunit 12                                   | 660.49  | 26.75 | 52895  | 12 | 0.00192831 | 2.01469473 | 0.022812956 | 0 | 0 | 0.0089001847 |
| Q8JZY2 | Comm10   | COMM domain-containing protein 10                                                 | 42.59   | 5.94  | 22812  | 1  | 0.00193122 | 7.19970388 | 0.022812956 | 0 | 0 | 0.0089001847 |
| Q9Z0M5 | Lipa     | Lysosomal acid lipase/cholesteryl ester hydrolase                                 | 105.58  | 4.79  | 45325  | 2  | 0.00193371 | 3.26295786 | 0.022812956 | 0 | 0 | 0.0089001847 |
| Q9Z0N1 | Eif2s3x  | Eukaryotic translation initiation factor 2 subunit 3, X-linked                    | 1076    | 43.64 | 51065  | 18 | 0.00194641 | 1.55654939 | 0.022868273 | 0 | 0 | 0.0089217658 |
| Q62433 | Ndrp1    | Protein NDRG1                                                                     | 343.89  | 26.14 | 43009  | 5  | 0.0019547  | 1.99323643 | 0.02287165  | 0 | 0 | 0.0089230834 |
| Q9Z0J0 | Npc2     | NPC intracellular cholesterol transporter 2                                       | 125.05  | 24.83 | 16442  | 3  | 0.0019881  | 3.1105686  | 0.023167188 | 0 | 0 | 0.0090383839 |
| P09811 | Pygl     | Glycogen phosphorylase, liver form                                                | 145.66  | 3.76  | 97483  | 3  | 0.00199619 | 2.36232798 | 0.023167188 | 0 | 0 | 0.0090383839 |
| Q8CI51 | Pdlim5   | PDZ and LIM domain protein 5                                                      | 341.34  | 16.24 | 63299  | 7  | 0.00201011 | 2.44149867 | 0.023234316 | 0 | 0 | 0.0090645729 |
| Q8VIJ5 | Oga      | Protein O-GlcNAcase                                                               | 77.43   | 2.18  | 102918 | 2  | 0.00204886 | 3.22469373 | 0.023586706 | 0 | 0 | 0.0092020535 |
| Q9D0R2 | Tars     | Threonine--tRNA ligase, cytoplasmic                                               | 1509.11 | 42.52 | 83356  | 27 | 0.00208139 | 2.39805316 | 0.023732213 | 0 | 0 | 0.009258821  |
| P51908 | Apobec1  | C->U-editing enzyme APOBEC-1                                                      | 98.89   | 11.35 | 27522  | 2  | 0.00208591 | 2.64360409 | 0.023732213 | 0 | 0 | 0.009258821  |
| Q02053 | Uba1     | Ubiquitin-like modifier-activating enzyme 1                                       | 1796.89 | 34.5  | 117809 | 27 | 0.00209868 | 2.06682097 | 0.023732213 | 0 | 0 | 0.009258821  |
| O54984 | Asna1    | ATPase Asna1                                                                      | 230.76  | 14.08 | 38823  | 5  | 0.00211037 | 2.02492233 | 0.023732213 | 0 | 0 | 0.009258821  |
| P20152 | Vim      | Vimentin                                                                          | 3985.31 | 85.19 | 53688  | 65 | 0.00211251 | 2.03010812 | 0.023732213 | 0 | 0 | 0.009258821  |
| P63328 | Ppp3ca   | Serine/threonine-protein phosphatase 2B catalytic subunit alpha isoform           | 374.49  | 16.51 | 58644  | 7  | 0.00211905 | 2.04558791 | 0.023732213 | 0 | 0 | 0.009258821  |
| G3X982 | Aox3     | Aldehyde oxidase 3                                                                | 63.4    | 1.27  | 146902 | 2  | 0.00211969 | 1.96049804 | 0.023732213 | 0 | 0 | 0.009258821  |
| Q9CVB6 | Arpc2    | Actin-related protein 2/3 complex subunit 2                                       | 913.72  | 46.33 | 34357  | 15 | 0.00216966 | 2.00882027 | 0.024196763 | 0 | 0 | 0.0094400594 |
| Q9D338 | Mrpl19   | 39S ribosomal protein L19, mitochondrial                                          | 249.54  | 15.07 | 33578  | 5  | 0.00219165 | 0.62928712 | 0.024346929 | 0 | 0 | 0.0094986448 |
| Q76MZ3 | Ppp2r1a  | Serine/threonine-protein phosphatase 2A 65 kDa regulatory subunit A alpha isoform | 1267.77 | 41.77 | 65323  | 20 | 0.0022453  | 1.86307563 | 0.02459404  | 0 | 0 | 0.0095950518 |
| P41216 | Acs11    | Long-chain-fatty-acid--CoA ligase 1                                               | 832.42  | 29.61 | 77951  | 16 | 0.00224645 | 1.65104798 | 0.02459404  | 0 | 0 | 0.0095950518 |

|         |          |                                                            |          |       |        |    |            |            |             |                |   |              |
|---------|----------|------------------------------------------------------------|----------|-------|--------|----|------------|------------|-------------|----------------|---|--------------|
| Q6PB66  | Lrpprc   | Leucine-rich PPR motif-containing protein, mitochondrial   | 1213.73  | 19.76 | 156615 | 20 | 0.00224733 | 1.96143756 | 0.02459404  | 0              | 0 | 0.0095950518 |
| Q62393  | Tpd52    | Tumor protein D52                                          | 191.8    | 16.07 | 24313  | 3  | 0.00227854 | 2.79002527 | 0.02459404  | 0              | 0 | 0.0095950518 |
| Q8BFT2  | Haus4    | HAUS augmin-like complex subunit 4                         | 40.47    | 7.16  | 42197  | 1  | 0.00228087 | 9.77083389 | 0.02459404  | 0              | 0 | 0.0095950518 |
| Q99KQ4  | Nampt    | Nicotinamide phosphoribosyltransferase                     | 468.5    | 22.81 | 55447  | 9  | 0.00228495 | 3.02127711 | 0.02459404  | 0              | 0 | 0.0095950518 |
| P42932  | Cct8     | T-complex protein 1 subunit theta                          | 1788.49  | 55.11 | 59555  | 33 | 0.00229178 | 1.90998455 | 0.02459404  | 0              | 0 | 0.0095950518 |
| P56477  | Irf5     | Interferon regulatory factor 5                             | 205.02   | 14.08 | 56005  | 4  | 0.00229471 | 2.77927689 | 0.02459404  | 0              | 0 | 0.0095950518 |
| Q61584  | Fxr1     | Fragile X mental retardation syndrome-related protein 1    | 818.29   | 27.33 | 76222  | 14 | 0.00230117 | 1.38568437 | 0.02459404  | 0              | 0 | 0.0095950518 |
| Q9CPN8  | Igf2bp3  | Insulin-like growth factor 2 mRNA-binding protein 3        | 718.01   | 25.04 | 63575  | 12 | 0.00231054 | 1.78544989 | 0.02459404  | 0              | 0 | 0.0095950518 |
| Q68FL6  | Mars     | Methionine--tRNA ligase, cytoplasmic                       | 821.32   | 21.4  | 101431 | 14 | 0.00231857 | 2.28413376 | 0.02459404  | 0              | 0 | 0.0095950518 |
| Q5FVC2  | Arhgef2  | Rho guanine nucleotide exchange factor 2                   | 452.36   | 11.37 | 111909 | 8  | 0.00232244 | 1.28074535 | 0.02459404  | 0              | 0 | 0.0095950518 |
| Q9JKF1  | Iqgap1   | Ras GTPase-activating-like protein IQGAP1                  | 4641.94  | 51.84 | 188742 | 74 | 0.00232999 | 2.15837632 | 0.02459404  | 0              | 0 | 0.0095950518 |
| Q921F4  | Hnrnp1l  | Heterogeneous nuclear ribonucleoprotein L-like             | 420.45   | 17.77 | 64125  | 7  | 0.0023345  | 1.93666313 | 0.02459404  | 0              | 0 | 0.0095950518 |
| Q07076  | Anxa7    | Annexin A7                                                 | 656      | 21.6  | 49925  | 10 | 0.00237087 | 1.19845911 | 0.024885445 | 0              | 0 | 0.0097087401 |
| Q4G009  | Mcts1    | Malignant T-cell-amplified sequence 1                      | 121.98   | 10.44 | 20550  | 1  | 0.0023828  | 13.9927819 | 0.024918991 | 0              | 0 | 0.0097218274 |
| Q924T2  | Mrps2    | 28S ribosomal protein S2, mitochondrial                    | 262.11   | 27.49 | 32313  | 5  | 0.00242046 | 1.74772484 | 0.025123281 | 0              | 0 | 0.0098015287 |
| P57780  | Actn4    | Alpha-actinin-4                                            | 1551.8   | 35.31 | 104977 | 25 | 0.00242179 | 2.09795296 | 0.025123281 | 0              | 0 | 0.0098015287 |
| P47754  | Capza2   | F-actin-capping protein subunit alpha-2                    | 401.02   | 24.83 | 32967  | 7  | 0.00242873 | 1.96239845 | 0.025123281 | 0              | 0 | 0.0098015287 |
| P35738  | Bckdhb   | 2-oxoisovalerate dehydrogenase subunit beta, mitochondrial | 69.84    | 2.82  | 42823  | 1  | 0.00245432 | 5.19677231 | 0.025296372 | 0              | 0 | 0.0098690579 |
| Q9R1C7  | Prpf40a  | Pre-mRNA-processing factor 40 homolog A                    | 172.11   | 5.14  | 108481 | 3  | 0.00247031 | 1.74094741 | 0.025369511 | 0              | 0 | 0.0098975922 |
| P70188  | Kifap3   | Kinesin-associated protein 3                               | 42.04    | 2.52  | 91291  | 1  | 0.00248435 | 18.0613651 | 0.025422311 | 0              | 0 | 0.0099181913 |
| P09405  | Ncl      | Nucleolin                                                  | 2666.021 | 42.15 | 76723  | 40 | 0.00250299 | 0.44677949 | 0.02544066  | 0              | 0 | 0.0099253498 |
| Q8K202  | Polr1e   | DNA-directed RNA polymerase I subunit RPA49                | 115.42   | 4.56  | 54034  | 2  | 0.00250397 | 0.19827625 | 0.02544066  | 0              | 0 | 0.0099253498 |
| P23780  | Glb1     | Beta-galactosidase                                         | 629.76   | 20.25 | 73121  | 11 | 0.0025192  | 1.60490304 | 0.025504631 | 0              | 0 | 0.0099503075 |
| O35593  | Psm14    | 26S proteasome non-ATPase regulatory subunit 14            | 324.09   | 27.1  | 34577  | 6  | 0.00252834 | 2.67970453 | 0.025506792 | 0              | 0 | 0.0099511507 |
| Q810B6  | Ankfy1   | Rabankyrin-5                                               | 143.67   | 4.7   | 128653 | 4  | 0.00254197 | 1.89030319 | 0.02555395  | 0              | 0 | 0.0099695485 |
| B0BN93  | Psm13    | 26S proteasome non-ATPase regulatory subunit 13            | 355.53   | 21.01 | 42817  | 8  | 0.00256655 | 3.15510916 | 0.025710542 | 0              | 0 | 0.010030641  |
| Q9D0B6  | Pbdc1    | Protein PBDC1                                              | 153.66   | 19.19 | 22223  | 3  | 0.00259817 | 2.72681347 | 0.025886014 | 0              | 0 | 0.010099099  |
| O89079  | Cope     | Coatomer subunit epsilon                                   | 321.85   | 21.75 | 34567  | 4  | 0.0026022  | 2.55870457 | 0.025886014 | 0              | 0 | 0.010099099  |
| P62482  | Kcnab2   | Voltage-gated potassium channel subunit beta-2             | 227.05   | 22.62 | 41021  | 5  | 0.00263218 | 3.19421431 | 0.026093341 | 0              | 0 | 0.010179985  |
| Q2TPA8  | Hsd12    | Hydroxysteroid dehydrogenase-like protein 2                | 36.84    | 2.86  | 54208  | 1  | 0.00265067 | 6.60848349 | 0.026185692 | 0              | 0 | 0.010216015  |
| Q9ES52  | Inpp5d   | Phosphatidylinositol 3,4,5-trisphosphate 5-phosphatase 1   | 1091.19  | 24.43 | 133542 | 23 | 0.00269122 | 1.68175723 | 0.026444631 | 0              | 0 | 0.010317691  |
| P62259  | Ywhae    | 14-3-3 protein epsilon                                     | 1078.54  | 63.92 | 29174  | 19 | 0.00269558 | 2.51365826 | 0.026444631 | 0              | 0 | 0.010317691  |
| Q5U2Q3  |          | Ester hydrolase C11orf54 homolog                           | 54.76    | 8.89  | 34993  | 2  | 0.00270843 | 4.05774483 | 0.026481417 | 0              | 0 | 0.010331388  |
| Q4QQT6  | Brix1    | Ribosome biogenesis protein BRX1 homolog                   | 199.78   | 13.07 | 41115  | 5  | 0.00274098 | 0.48632593 | 0.026634013 | 0              | 0 | 0.010390921  |
| Q8C147  | Dock8    | Dedicator of cytokinesis protein 8                         | 98.39    | 1.19  | 238978 | 2  | 0.0027427  | 3.38834678 | 0.026634013 | 0              | 0 | 0.010390921  |
| Q9DBL7  | Coasy    | Bifunctional coenzyme A synthase                           | 248.51   | 14.03 | 62023  | 5  | 0.00276322 | 1.97941254 | 0.026742395 | 0              | 0 | 0.010433205  |
| P83940  | Eloc     | Elongin-C                                                  | 257.95   | 37.5  | 12473  | 3  | 0.00277421 | 2.49937825 | 0.026758037 | 0              | 0 | 0.010439308  |
| Q571E4  | Galns    | N-acetylgalactosamine-6-sulfatase                          | 304.38   | 18.85 | 57673  | 7  | 0.00278567 | 1.86000638 | 0.02677805  | 4.9406565e-324 | 0 | 0.010447115  |
| Q3ZAV8  | Edc4     | Enhancer of mRNA-decapping protein 4                       | 254.96   | 5.12  | 152596 | 4  | 0.00282114 | 2.73189985 | 0.027028014 | 1.4821969e-323 | 0 | 0.010544636  |
| Q8BUBK6 | Hook3    | Protein Hook homolog 3                                     | 81.27    | 3.62  | 83218  | 2  | 0.00285301 | 7.4480332  | 0.027241959 | 6.4228534e-323 | 0 | 0.010628104  |
| O88545  | Cops6    | COP9 signalosome complex subunit 6                         | 168.65   | 8.33  | 35880  | 4  | 0.00289024 | 2.50720209 | 0.027450951 | 2.8655807e-322 | 0 | 0.010709639  |
| Q9D5V5  | Cul5     | Cullin-5                                                   | 113.82   | 3.33  | 90974  | 2  | 0.00289413 | 1.91161365 | 0.027450951 | 1.3142146e-321 | 0 | 0.010709639  |
| Q99LE6  | Abcf2    | ATP-binding cassette sub-family F member 2                 | 124.97   | 5.57  | 71782  | 3  | 0.00291517 | 3.11045077 | 0.027501336 | 6.0226602e-321 | 0 | 0.010729296  |
| Q8R1Q8  | Dync1li1 | Cytoplasmic dynein 1 light intermediate chain 1            | 437.14   | 22.18 | 56614  | 7  | 0.00291871 | 2.08694765 | 0.027501336 | 2.7603448e-320 | 0 | 0.010729296  |

|        |          |                                                                        |         |       |        |    |            |            |             |                |   |             |
|--------|----------|------------------------------------------------------------------------|---------|-------|--------|----|------------|------------|-------------|----------------|---|-------------|
| P60892 | Prps1    | Ribose-phosphate pyrophosphokinase 1                                   | 692     | 38.99 | 34834  | 14 | 0.00293677 | 1.77954687 | 0.02756377  | 1.2635729e-319 | 0 | 0.010753654 |
| Q8CCH2 | Nhlrc3   | NHL repeat-containing protein 3                                        | 379.18  | 26.8  | 38195  | 6  | 0.00294464 | 2.40921728 | 0.02756377  | 5.7755286e-319 | 0 | 0.010753654 |
| O88844 | Idh1     | Isocitrate dehydrogenase [NADP] cytoplasmic                            | 804.68  | 35.27 | 46674  | 14 | 0.00297626 | 2.12810284 | 0.027768696 | 2.6361663e-318 | 0 | 0.010833603 |
| Q8K124 | Plekho2  | Pleckstrin homology domain-containing family O member 2                | 133.36  | 9.29  | 53872  | 3  | 0.00299181 | 1.93707901 | 0.027822904 | 1.2015588e-317 | 0 | 0.010854752 |
| Q9JHW2 | Nit2     | Omega-amidase NIT2                                                     | 523.68  | 35.87 | 30502  | 8  | 0.00300599 | 2.54664086 | 0.027863989 | 5.4689791e-317 | 0 | 0.010870781 |
| O35344 | Kpna3    | Importin subunit alpha-4                                               | 219.47  | 9.21  | 57773  | 3  | 0.0030227  | 1.70229045 | 0.027889346 | 2.4857463e-316 | 0 | 0.010880674 |
| Q7M0E3 | Dstn     | Destrin                                                                | 579.56  | 56.36 | 18534  | 10 | 0.00302958 | 1.60938827 | 0.027889346 | 1.1282273e-315 | 0 | 0.010880674 |
| Q99KK7 | Dpp3     | Dipeptidyl peptidase 3                                                 | 655.5   | 29.67 | 82898  | 12 | 0.00303878 | 2.08946436 | 0.027889346 | 5.1135867e-315 | 0 | 0.010880674 |
| Q4V7C7 | Actr3    | Actin-related protein 3                                                | 1214.16 | 60.05 | 47357  | 21 | 0.00305077 | 2.00344021 | 0.027889346 | 2.3144285e-314 | 0 | 0.010880674 |
| P22682 | Cbl      | E3 ubiquitin-protein ligase CBL                                        | 75.93   | 1.64  | 100564 | 1  | 0.00305757 | 4.54954673 | 0.027889346 | 1.0460465e-313 | 0 | 0.010880674 |
| Q8BLF1 | Nceh1    | Neutral cholesterol ester hydrolase 1                                  | 696.11  | 37.25 | 45740  | 11 | 0.00309767 | 2.21547622 | 0.028165084 | 4.7211436e-313 | 0 | 0.010988249 |
| P35123 | Usp4     | Ubiquitin carboxyl-terminal hydrolase 4                                | 210.45  | 7.9   | 108343 | 5  | 0.00312159 | 2.99738262 | 0.028260422 | 2.1278078e-312 | 0 | 0.011025444 |
| P19096 | Fasn     | Fatty acid synthase                                                    | 3753.07 | 37.9  | 272428 | 67 | 0.00312902 | 1.65457583 | 0.028260422 | 9.5764927e-312 | 0 | 0.011025444 |
| Q8BFY9 | Tnpo1    | Transportin-1                                                          | 422.59  | 8.91  | 102357 | 8  | 0.00314217 | 2.52869094 | 0.028260422 | 4.3039716e-311 | 0 | 0.011025444 |
| Q9Z2A0 | Pdpk1    | 3-phosphoinositide-dependent protein kinase 1                          | 43.49   | 3.04  | 63759  | 1  | 0.00314775 | 7.78153661 | 0.028260422 | 1.9316172e-310 | 0 | 0.011025444 |
| Q1AAU6 | Asap1    | Arf-GAP with SH3 domain, ANK repeat and PH domain-containing protein 1 | 158.6   | 5.42  | 127088 | 3  | 0.00317527 | 2.35610375 | 0.028418161 | 8.6568813e-310 | 0 | 0.011086984 |
| O55023 | Impa1    | Inositol monophosphatase 1                                             | 402.31  | 24.91 | 30436  | 8  | 0.00321843 | 1.77203565 | 0.028714418 | 3.8742754e-309 | 0 | 0.011202565 |
| Q3UIA2 | Arhgap17 | Rho GTPase-activating protein 17                                       | 126.71  | 2.6   | 92202  | 2  | 0.00328174 | 1.67060298 | 0.029074815 | 1.7314426e-308 | 0 | 0.011343169 |
| Q9CPU0 | Glo1     | Lactoylglutathione lyase                                               | 326.04  | 51.63 | 20810  | 7  | 0.00328572 | 3.023915   | 0.029074815 | 7.7270587e-308 | 0 | 0.011343169 |
| Q61183 | Papola   | Poly(A) polymerase alpha                                               | 94.89   | 2.84  | 82309  | 2  | 0.00328937 | 3.38409254 | 0.029074815 | 3.4435689e-307 | 0 | 0.011343169 |
| Q66H50 | Far1     | Fatty acyl-CoA reductase 1                                             | 278.78  | 15.53 | 59268  | 5  | 0.00330977 | 0.50237227 | 0.029164813 | 1.5324691e-306 | 0 | 0.011378281 |
| Q62048 | Pea15    | Astrocytic phosphoprotein PEA-15                                       | 156.7   | 16.92 | 15054  | 3  | 0.00332339 | 4.70052465 | 0.029194687 | 6.8102487e-306 | 0 | 0.011389936 |
| Q8CI71 | Vps50    | Syndetin                                                               | 91.89   | 2.07  | 111174 | 2  | 0.00339968 | 2.39888879 | 0.029745019 | 3.0221949e-305 | 0 | 0.011604641 |
| P97310 | Mcm2     | DNA replication licensing factor MCM2                                  | 1505.4  | 35.95 | 102078 | 25 | 0.00341655 | 1.26751669 | 0.029745019 | 1.3392762e-304 | 0 | 0.011604641 |
| P46467 | Vps4b    | Vacuolar protein sorting-associated protein 4B                         | 376.17  | 22.07 | 49419  | 7  | 0.00341729 | 1.86039094 | 0.029745019 | 5.9266043e-304 | 0 | 0.011604641 |
| Q9CPP0 | Npm3     | Nucleoplasmin-3                                                        | 196.37  | 21.14 | 19023  | 3  | 0.00345931 | 0.29316506 | 0.030019197 | 2.6189654e-303 | 0 | 0.011711608 |
| O88531 | Ppt1     | Palmitoyl-protein thioesterase 1                                       | 424.97  | 23.86 | 34490  | 6  | 0.00348864 | 1.9568391  | 0.030136579 | 1.1556905e-302 | 0 | 0.011757403 |
| Q9CPS7 | Pno1     | RNA-binding protein PNO1                                               | 292.98  | 38.31 | 27454  | 7  | 0.00349394 | 2.11890905 | 0.030136579 | 5.0926196e-302 | 0 | 0.011757403 |
| E9PVX6 | Mki67    | Proliferation marker protein Ki-67                                     | 2692.99 | 22.88 | 350864 | 50 | 0.00353468 | 0.56124023 | 0.03037735  | 2.2409324e-301 | 0 | 0.011851337 |
| Q9DCB8 | Isca2    | Iron-sulfur cluster assembly 2 homolog, mitochondrial                  | 99.04   | 20.78 | 16718  | 2  | 0.00354314 | 4.25190854 | 0.03037735  | 9.847002e-301  | 0 | 0.011851337 |
| Q921X6 | Polr3f   | DNA-directed RNA polymerase III subunit RPC6                           | 38.8    | 3.48  | 35652  | 1  | 0.00363736 | 18.6971306 | 0.03105511  | 4.320828e-300  | 0 | 0.012115756 |
| Q91YP3 | Dera     | Deoxyribose-phosphate aldolase                                         | 254.64  | 20.75 | 34975  | 5  | 0.00365743 | 2.0097772  | 0.03105511  | 1.8932917e-299 | 0 | 0.012115756 |
| Q8R0H9 | Gga1     | ADP-ribosylation factor-binding protein GGA1                           | 176.33  | 7.56  | 69972  | 4  | 0.00365921 | 2.41912544 | 0.03105511  | 8.2842966e-299 | 0 | 0.012115756 |
| Q9JLQ0 | Cd2ap    | CD2-associated protein                                                 | 193.96  | 7.22  | 70450  | 4  | 0.0036657  | 1.91550108 | 0.03105511  | 3.6197718e-298 | 0 | 0.012115756 |
| P63085 | Mapk1    | Mitogen-activated protein kinase 1                                     | 413.33  | 29.89 | 41276  | 10 | 0.00371144 | 2.59690615 | 0.031374604 | 1.5794073e-297 | 0 | 0.012240403 |
| O35263 | Pafah1b3 | Platelet-activating factor acetylhydrolase IB subunit gamma            | 65.54   | 3.88  | 25863  | 1  | 0.00373125 | 2.01723771 | 0.031423974 | 6.8816788e-297 | 0 | 0.012259664 |
| D3ZBE5 | Nek7     | Serine/threonine-protein kinase Nek7                                   | 60.98   | 7.95  | 34529  | 2  | 0.00374869 | 2.59616697 | 0.03147801  | 2.9942074e-296 | 0 | 0.012280745 |
| Q3TXS7 | Psm1     | 26S proteasome non-ATPase regulatory subunit 1                         | 1354.49 | 33.05 | 105730 | 23 | 0.00376801 | 1.73886725 | 0.031526503 | 1.3009378e-295 | 0 | 0.012299664 |
| Q8K214 | Manba    | Beta-mannosidase                                                       | 285.63  | 6.6   | 100831 | 6  | 0.00377655 | 3.89620192 | 0.031526503 | 5.6444061e-295 | 0 | 0.012299664 |
| A2AN08 | Ubr4     | E3 ubiquitin-protein ligase UBR4                                       | 309.76  | 1.31  | 572290 | 5  | 0.00379788 | 2.69392161 | 0.03161206  | 2.4454961e-294 | 0 | 0.012333043 |
| Q9JJU8 | Sh3bgr1  | SH3 domain-binding glutamic acid-rich-like protein                     | 362.73  | 70.18 | 12811  | 6  | 0.00384538 | 1.7702329  | 0.031914389 | 1.0580413e-293 | 0 | 0.012450993 |
| Q80X80 | C2cd2l   | Phospholipid transfer protein C2CD2L                                   | 53.79   | 1.42  | 76329  | 1  | 0.00386636 | 3.26660375 | 0.031936788 | 4.5711463e-293 | 0 | 0.012459732 |
| P62627 | Dynlrb1  | Dynein light chain roadblock-type 1                                    | 100.5   | 26.04 | 10990  | 2  | 0.00387045 | 2.37773303 | 0.031936788 | 1.9721247e-292 | 0 | 0.012459732 |
| Q80YW0 | Cyth4    | Cytohesin-4                                                            | 46.49   | 2.54  | 45285  | 1  | 0.00389308 | 3.36576861 | 0.031976821 | 8.4963092e-292 | 0 | 0.01247535  |



|        |          |                                                                     |         |       |        |    |            |            |             |                |   |             |
|--------|----------|---------------------------------------------------------------------|---------|-------|--------|----|------------|------------|-------------|----------------|---|-------------|
| Q9JHK5 | Plek     | Pleckstrin                                                          | 545.19  | 45.14 | 39901  | 10 | 0.0038977  | 1.49055836 | 0.031976821 | 3.6552144e-291 | 0 | 0.01247535  |
| Q7TMQ7 | Wdr91    | WD repeat-containing protein 91                                     | 206.18  | 7.22  | 83421  | 4  | 0.00393802 | 2.4190404  | 0.032215009 | 1.5702974e-290 | 0 | 0.012568276 |
| Q14C51 | Ptcd3    | Pentatricopeptide repeat domain-containing protein 3, mitochondrial | 76.14   | 3.5   | 77796  | 2  | 0.00395843 | 1.49459697 | 0.032289445 | 6.7365479e-290 | 0 | 0.012597316 |
| Q8CGF7 | Teerg1   | Transcription elongation regulator 1                                | 350.65  | 7.18  | 123788 | 7  | 0.00404304 | 1.61583704 | 0.032885698 | 2.8858865e-289 | 0 | 0.012829937 |
| Q9CQI6 | Cotl1    | Coactosin-like protein                                              | 599.88  | 76.06 | 15944  | 12 | 0.00407215 | 1.79639873 | 0.032995274 | 1.2345463e-288 | 0 | 0.012872687 |
| Q91V12 | Acot7    | Cytosolic acyl coenzyme A thioester hydrolase                       | 406.28  | 29.66 | 42537  | 8  | 0.00408185 | 2.0363066  | 0.032995274 | 5.273776e-288  | 0 | 0.012872687 |
| Q62639 | Rheb     | GTP-binding protein Rheb                                            | 119.81  | 23.37 | 20479  | 3  | 0.00409952 | 2.40209761 | 0.032995274 | 2.2496869e-287 | 0 | 0.012872687 |
| P32921 | Wars     | Tryptophan--tRNA ligase, cytoplasmic                                | 568.58  | 30.77 | 54358  | 10 | 0.00410563 | 2.16492565 | 0.032995274 | 9.5831548e-287 | 0 | 0.012872687 |
| Q9WV85 | Nme3     | Nucleoside diphosphate kinase 3                                     | 75.17   | 10.06 | 19099  | 1  | 0.00412503 | 3.29895788 | 0.032995274 | 4.0764381e-286 | 0 | 0.012872687 |
| P61750 | Arf4     | ADP-ribosylation factor 4                                           | 645.19  | 47.22 | 20397  | 9  | 0.00412807 | 1.76858598 | 0.032995274 | 1.731566e-285  | 0 | 0.012872687 |
| P62944 | Ap2b1    | AP-2 complex subunit beta                                           | 723.3   | 20.28 | 104553 | 14 | 0.00413741 | 1.27693771 | 0.032995274 | 7.3448511e-285 | 0 | 0.012872687 |
| P17047 | Lamp2    | Lysosome-associated membrane glycoprotein 2                         | 373.35  | 14.46 | 45681  | 7  | 0.00415041 | 1.77640184 | 0.033006717 | 3.1110902e-284 | 0 | 0.012877151 |
| P62192 | Psmc1    | 26S proteasome regulatory subunit 4                                 | 390.91  | 17.05 | 49185  | 7  | 0.00417704 | 1.63303775 | 0.03312627  | 1.3159149e-283 | 0 | 0.012923793 |
| Q8VI75 | Ipo4     | Importin-4                                                          | 163.73  | 3.51  | 119275 | 4  | 0.00420794 | 2.59377613 | 0.033155764 | 5.5581271e-283 | 0 | 0.012935299 |
| O55131 | Sept7    | Septin-7                                                            | 558.53  | 28.67 | 50550  | 10 | 0.00421421 | 1.50803424 | 0.033155764 | 2.3443074e-282 | 0 | 0.012935299 |
| P97360 | Etv6     | Transcription factor ETV6                                           | 50.2    | 1.44  | 56406  | 1  | 0.0042156  | 2.49828826 | 0.033155764 | 9.8738366e-282 | 0 | 0.012935299 |
| Q8R317 | Ubln1    | Ubiquilin-1                                                         | 106.21  | 5.5   | 61976  | 2  | 0.00425588 | 2.16641368 | 0.033234794 | 4.1528145e-281 | 0 | 0.012966132 |
| Q9CQE8 | RTRAF    | RNA transcription, translation and transport factor protein         | 48.88   | 12.3  | 28152  | 1  | 0.00426771 | 5.14073433 | 0.033234794 | 1.7441517e-280 | 0 | 0.012966132 |
| P10649 | Gstm1    | Glutathione S-transferase Mu 1                                      | 454.27  | 40.83 | 25970  | 8  | 0.00427884 | 1.93849821 | 0.033234794 | 7.3149441e-280 | 0 | 0.012966132 |
| Q3UM18 | Lsg1     | Large subunit GTPase 1 homolog                                      | 43.9    | 2.17  | 73157  | 1  | 0.00428261 | 3.26366676 | 0.033234794 | 3.063534e-279  | 0 | 0.012966132 |
| Q8BYA0 | Tbcd     | Tubulin-specific chaperone D                                        | 135.78  | 3.09  | 133321 | 3  | 0.00428385 | 2.88147278 | 0.033234794 | 1.2812068e-278 | 0 | 0.012966132 |
| Q9Z2G9 | Htatip2  | Oxidoreductase HTATIP2                                              | 77.88   | 11.16 | 26870  | 2  | 0.00431992 | 2.11419566 | 0.03333467  | 5.350576e-278  | 0 | 0.013005098 |
| Q5BJY6 | Amdhd2   | N-acetylglucosamine-6-phosphate deacetylase                         | 148.98  | 8.31  | 43539  | 3  | 0.00432008 | 3.01615931 | 0.03333467  | 2.2313437e-277 | 0 | 0.013005098 |
| D3ZYR1 | Fcho2    | F-BAR domain only protein 2                                         | 49.33   | 2.97  | 88712  | 1  | 0.00435618 | 4.28453116 | 0.033522597 | 9.2921665e-277 | 0 | 0.013078415 |
| Q99LQ7 | Tmem189  | Transmembrane protein 189                                           | 37.2    | 3.69  | 31134  | 1  | 0.00438846 | 1.67376544 | 0.033610175 | 3.8641319e-276 | 0 | 0.013112582 |
| A0MZ67 | Shtn1    | Shootin-1                                                           | 202.58  | 8.06  | 71446  | 4  | 0.0043911  | 2.64304411 | 0.033610175 | 1.6046166e-275 | 0 | 0.013112582 |
| P54823 | Ddx6     | Probable ATP-dependent RNA helicase DDX6                            | 665.64  | 33.54 | 54192  | 11 | 0.0044389  | 1.58797437 | 0.033885223 | 6.6538786e-275 | 0 | 0.013219889 |
| Q8QZY1 | Eif3l    | Eukaryotic translation initiation factor 3 subunit L                | 823.12  | 24.82 | 66613  | 12 | 0.00447965 | 2.3393491  | 0.034105053 | 2.7552604e-274 | 0 | 0.013305653 |
| Q8R1F1 | Fam129b  | Niban-like protein 1                                                | 398.35  | 12.28 | 84819  | 8  | 0.00449751 | 2.43281201 | 0.034135514 | 1.1392905e-273 | 0 | 0.013317537 |
| Q63486 | Rraga    | Ras-related GTP-binding protein A                                   | 115.7   | 6.71  | 36566  | 2  | 0.00450756 | 1.85855554 | 0.034135514 | 4.7042489e-273 | 0 | 0.013317537 |
| P24270 | Cat      | Catalase                                                            | 1157.96 | 48.39 | 59795  | 18 | 0.00453172 | 2.34327034 | 0.034227667 | 1.9396795e-272 | 0 | 0.013353489 |
| Q3TIR1 | Trappc13 | Trafficking protein particle complex subunit 13                     | 96.87   | 8.87  | 46477  | 2  | 0.00454496 | 2.36846054 | 0.034237114 | 7.9864436e-272 | 0 | 0.013357175 |
| Q61462 | Cyba     | Cytochrome b-245 light chain                                        | 36.45   | 3.65  | 20748  | 1  | 0.00456931 | 0.56511364 | 0.034329948 | 3.2836779e-271 | 0 | 0.013393393 |
| P62137 | Ppp1ca   | Serine/threonine-protein phosphatase PP1-alpha catalytic subunit    | 1025.09 | 49.09 | 37540  | 16 | 0.00459224 | 1.49100834 | 0.034342764 | 1.3481904e-270 | 0 | 0.013398393 |
| O08788 | Dctn1    | Dynaactin subunit 1                                                 | 295.4   | 7.57  | 141676 | 6  | 0.00459507 | 1.4949278  | 0.034342764 | 5.5274572e-270 | 0 | 0.013398393 |
| Q9D8M4 | Rpl7l1   | 60S ribosomal protein L7-like 1                                     | 216.52  | 19.92 | 28544  | 5  | 0.00466233 | 0.62974493 | 0.034754466 | 2.2629914e-269 | 0 | 0.013559013 |
| P24547 | Impdh2   | Inosine-5'-monophosphate dehydrogenase 2                            | 1327.83 | 39.49 | 55815  | 21 | 0.00467539 | 1.9612914  | 0.034761021 | 9.2517452e-269 | 0 | 0.01356157  |
| P97369 | Ncf4     | Neutrophil cytosol factor 4                                         | 670.34  | 50.74 | 38707  | 12 | 0.00469536 | 1.29481554 | 0.034813501 | 3.7770052e-268 | 0 | 0.013582045 |
| Q61792 | Lasp1    | LIM and SH3 domain protein 1                                        | 380.74  | 20.15 | 29994  | 6  | 0.00470683 | 1.87383639 | 0.034813501 | 1.5397654e-267 | 0 | 0.013582045 |
| P26516 | Psmc7    | 26S proteasome non-ATPase regulatory subunit 7                      | 496.05  | 27.1  | 36540  | 8  | 0.00473427 | 1.78400374 | 0.034925912 | 6.2682232e-267 | 0 | 0.0136259   |
| Q9JLJ2 | Aldh9a1  | 4-trimethylaminobutylaldehyde dehydrogenase                         | 1201.15 | 61.94 | 53515  | 21 | 0.00477154 | 1.83654448 | 0.035110151 | 2.5481042e-266 | 0 | 0.013697779 |
| Q04207 | Rela     | Transcription factor p65                                            | 44.41   | 2.55  | 60212  | 1  | 0.00480968 | 1.58669207 | 0.035187874 | 1.0343622e-265 | 0 | 0.013728102 |
| Q6WVG3 | Kctd12   | BTB/POZ domain-containing protein KCTD12                            | 561.19  | 42.2  | 35892  | 9  | 0.00481228 | 1.70037067 | 0.035187874 | 4.1928636e-265 | 0 | 0.013728102 |
| Q64324 | Stxbp2   | Syntaxin-binding protein 2                                          | 290.05  | 16.69 | 66357  | 6  | 0.00482805 | 2.03474253 | 0.035187874 | 1.6971934e-264 | 0 | 0.013728102 |
| Q00PI9 | Hnrmpu12 | Heterogeneous nuclear ribonucleoprotein U-like protein 2            | 689.28  | 17.58 | 84940  | 12 | 0.00484287 | 0.60881606 | 0.035187874 | 6.8601611e-264 | 0 | 0.013728102 |

|        |         |                                                                          |         |       |        |    |            |            |             |                |   |             |
|--------|---------|--------------------------------------------------------------------------|---------|-------|--------|----|------------|------------|-------------|----------------|---|-------------|
| Q9CWP6 | Mospd2  | Motile sperm domain-containing protein 2                                 | 103.84  | 3.47  | 59855  | 2  | 0.00484372 | 2.42637039 | 0.035187874 | 2.7689786e-263 | 0 | 0.013728102 |
| P97386 | Lig3    | DNA ligase 3                                                             | 45.7    | 0.99  | 113072 | 1  | 0.00487882 | 3.57568585 | 0.035286615 | 1.1160587e-262 | 0 | 0.013766624 |
| Q11136 | Pepd    | Xaa-Pro dipeptidase                                                      | 613.22  | 24.75 | 55029  | 11 | 0.00490075 | 2.10540499 | 0.035286615 | 4.4919673e-262 | 0 | 0.013766624 |
| Q4AEF8 | Copg1   | Coatomer subunit gamma-1                                                 | 709.58  | 20.02 | 97614  | 12 | 0.00490394 | 2.22834477 | 0.035286615 | 1.8053777e-261 | 0 | 0.013766624 |
| P07356 | Anxa2   | Annexin A2                                                               | 1472.16 | 72.27 | 38676  | 26 | 0.00490676 | 1.408946   | 0.035286615 | 7.2457175e-261 | 0 | 0.013766624 |
| P35980 | Rpl18   | 60S ribosomal protein L18                                                | 472.26  | 30.85 | 21645  | 7  | 0.00494186 | 0.68155886 | 0.035449757 | 2.9038653e-260 | 0 | 0.013830272 |
| Q9CQM9 | Glxr3   | Glutaredoxin-3                                                           | 479.38  | 30.56 | 37778  | 8  | 0.00495524 | 1.7436533  | 0.035456645 | 1.1621258e-259 | 0 | 0.013832959 |
| Q80UG5 | Sept9   | Septin-9                                                                 | 280.17  | 15.09 | 65575  | 6  | 0.00498564 | 1.90691751 | 0.035584997 | 4.6442043e-259 | 0 | 0.013883034 |
| Q01405 | Sec23a  | Protein transport protein Sec23A                                         | 220.37  | 8.89  | 86162  | 4  | 0.00504031 | 2.80340493 | 0.035739534 | 1.853322e-258  | 0 | 0.013943325 |
| Q8CFI2 | Cdc34   | Ubiquitin-conjugating enzyme E2 R1                                       | 34.63   | 2.98  | 26622  | 1  | 0.00504259 | 4.57327043 | 0.035739534 | 7.3853609e-258 | 0 | 0.013943325 |
| P47738 | Aldh2   | Aldehyde dehydrogenase, mitochondrial                                    | 1529.5  | 57.23 | 56538  | 24 | 0.00504484 | 1.61126816 | 0.035739534 | 2.938825e-257  | 0 | 0.013943325 |
| Q9QWR8 | Naga    | Alpha-N-acetylgalactosaminidase                                          | 395.16  | 23.61 | 47235  | 6  | 0.0050932  | 1.70618512 | 0.035807335 | 1.1677685e-256 | 0 | 0.013969776 |
| Q8R1F5 | Hyi     | Putative hydroxypyruvate isomerase                                       | 192.08  | 17.69 | 30449  | 4  | 0.00514068 | 3.60380779 | 0.035807335 | 4.6336231e-256 | 0 | 0.013969776 |
| Q64232 | Tecr    | Very-long-chain enoyl-CoA reductase                                      | 149.15  | 7.79  | 36123  | 3  | 0.00514171 | 0.33930562 | 0.035807335 | 1.8359695e-255 | 0 | 0.013969776 |
| P11438 | Lamp1   | Lysosome-associated membrane glycoprotein 1                              | 538.1   | 18.72 | 43865  | 8  | 0.00514333 | 1.40065624 | 0.035807335 | 7.2642519e-255 | 0 | 0.013969776 |
| O70200 | Aif1    | Allograft inflammatory factor 1                                          | 147.18  | 11.56 | 16911  | 1  | 0.00514571 | 5.05678647 | 0.035807335 | 2.8700991e-254 | 0 | 0.013969776 |
| B5DF89 | Cul3    | Cullin-3                                                                 | 174.39  | 9.51  | 88932  | 4  | 0.00514582 | 4.58092308 | 0.035807335 | 1.1323569e-253 | 0 | 0.013969776 |
| Q8BKZ9 | Pdhx    | Pyruvate dehydrogenase protein X component, mitochondrial                | 104.79  | 3.39  | 53999  | 2  | 0.00514636 | 4.45909335 | 0.035807335 | 4.4611837e-253 | 0 | 0.013969776 |
| Q91W86 | Vps11   | Vacuolar protein sorting-associated protein 11 homolog                   | 73      | 3.51  | 107719 | 2  | 0.00515475 | 2.25663666 | 0.035807335 | 1.7550806e-252 | 0 | 0.013969776 |
| Q91W50 | Csde1   | Cold shock domain-containing protein E1                                  | 1036.8  | 29.82 | 88791  | 18 | 0.00518433 | 1.39682819 | 0.035858038 | 6.8948387e-252 | 0 | 0.013989557 |
| Q8K1J6 | Trmt1   | CCA tRNA nucleotidyltransferase 1, mitochondrial                         | 112.86  | 6.45  | 49895  | 3  | 0.00518717 | 3.60233976 | 0.035858038 | 2.7047748e-251 | 0 | 0.013989557 |
| Q9JM90 | Stap1   | Signal-transducing adaptor protein 1                                     | 307.24  | 36.03 | 34628  | 7  | 0.00524383 | 1.38644619 | 0.036162162 | 1.0595414e-250 | 0 | 0.014108208 |
| Q8VE47 | Uba5    | Ubiquitin-like modifier-activating enzyme 5                              | 172.25  | 12.16 | 44790  | 3  | 0.00536551 | 3.95120937 | 0.036912089 | 4.1446176e-250 | 0 | 0.014400782 |
| Q8C0L0 | Tmx4    | Thioredoxin-related transmembrane protein 4                              | 146.54  | 7.46  | 37131  | 2  | 0.00549224 | 1.32449091 | 0.037557005 | 1.6189394e-249 | 0 | 0.014652388 |
| Q9DBG6 | Rpn2    | Dolichyl-diphosphooligosaccharide--protein glycosyltransferase subunit 2 | 875.04  | 29.32 | 69063  | 13 | 0.00550502 | 0.64068671 | 0.037557005 | 6.3147499e-249 | 0 | 0.014652388 |
| P61290 | Psme3   | Proteasome activator complex subunit 3                                   | 520.16  | 29.13 | 29506  | 9  | 0.00551922 | 2.2569562  | 0.037557005 | 2.4595806e-248 | 0 | 0.014652388 |
| Q8R307 | Vps18   | Vacuolar protein sorting-associated protein 18 homolog                   | 87.02   | 2.47  | 110219 | 2  | 0.00552191 | 2.32395024 | 0.037557005 | 9.5663254e-248 | 0 | 0.014652388 |
| P04256 | Hnrnpa1 | Heterogeneous nuclear ribonucleoprotein A1                               | 1476.03 | 55.31 | 34212  | 21 | 0.00553341 | 0.57075028 | 0.037557005 | 3.7154235e-247 | 0 | 0.014652388 |
| P22509 | Fbl     | rRNA 2'-O-methyltransferase fibrillar                                    | 918.82  | 58.1  | 34222  | 16 | 0.00556789 | 0.51812812 | 0.037557005 | 1.4409551e-246 | 0 | 0.014652388 |
| Q9JHJ0 | Tmod3   | Tropomodulin-3                                                           | 319.1   | 29.26 | 39503  | 7  | 0.00557005 | 1.91867527 | 0.037557005 | 5.5804778e-246 | 0 | 0.014652388 |
| P10711 | Tcea1   | Transcription elongation factor A protein 1                              | 529.83  | 39.87 | 33880  | 9  | 0.00557099 | 2.10257811 | 0.037557005 | 2.1580972e-245 | 0 | 0.014652388 |
| Q8BWU5 | Osgep   | Probable tRNA N6-adenosine threonylcarbamoyltransferase                  | 75.9    | 8.66  | 36301  | 2  | 0.00557764 | 3.55636074 | 0.037557005 | 8.3339174e-245 | 0 | 0.014652388 |
| Q8BH69 | Sephs1  | Selenide, water dikinase 1                                               | 178.57  | 14.03 | 42907  | 4  | 0.00559439 | 2.43586676 | 0.037581156 | 3.2137034e-244 | 0 | 0.01466181  |
| Q9CQN1 | Trap1   | Heat shock protein 75 kDa, mitochondrial                                 | 897.78  | 30.17 | 80209  | 15 | 0.00562009 | 1.50827206 | 0.037665129 | 1.2374871e-243 | 0 | 0.014694571 |
| P16110 | Lgals3  | Galectin-3                                                               | 686.86  | 35.23 | 27515  | 12 | 0.00568    | 2.45041    | 0.03790348  | 4.7583212e-243 | 0 | 0.014787561 |
| P04184 | Tk1     | Thymidine kinase, cytosolic                                              | 205.88  | 28.33 | 25776  | 5  | 0.00569512 | 1.81024888 | 0.03790348  | 1.8270265e-242 | 0 | 0.014787561 |
| Q99J77 | Nans    | Sialic acid synthase                                                     | 490.18  | 37.05 | 40024  | 9  | 0.00571753 | 2.30610314 | 0.03790348  | 7.0050918e-242 | 0 | 0.014787561 |
| Q9D662 | Sec23b  | Protein transport protein Sec23B                                         | 697.68  | 21.51 | 86437  | 11 | 0.00573604 | 1.65128942 | 0.03790348  | 2.6820111e-241 | 0 | 0.014787561 |
| P99029 | Prdx5   | Peroxiredoxin-5, mitochondrial                                           | 730.88  | 57.14 | 21897  | 12 | 0.00576186 | 1.77613827 | 0.03790348  | 1.0253802e-240 | 0 | 0.014787561 |
| O35075 | Dscr3   | Down syndrome critical region protein 3 homolog                          | 45.31   | 6.4   | 32970  | 1  | 0.00576954 | 3.95293499 | 0.03790348  | 3.9145947e-240 | 0 | 0.014787561 |
| Q61207 | Psap    | Prosaposin                                                               | 146.14  | 5.57  | 61422  | 3  | 0.00577969 | 2.00173867 | 0.03790348  | 1.4923339e-239 | 0 | 0.014787561 |
| Q9D819 | Ppa1    | Inorganic pyrophosphatase                                                | 241.96  | 17.3  | 32667  | 5  | 0.00578835 | 2.46501332 | 0.03790348  | 5.6809693e-239 | 0 | 0.014787561 |
| O35626 | Rasd1   | Dexamethasone-induced Ras-related protein 1                              | 38.44   | 2.5   | 31684  | 1  | 0.0057892  | 3.20477177 | 0.03790348  | 2.1595136e-238 | 0 | 0.014787561 |

|        |           |                                                                  |         |       |        |    |            |             |             |                |                |             |
|--------|-----------|------------------------------------------------------------------|---------|-------|--------|----|------------|-------------|-------------|----------------|----------------|-------------|
| Q91ZJ5 | Ugp2      | UTP--glucose-1-phosphate uridylyltransferase                     | 77.67   | 3.35  | 56979  | 2  | 0.00579896 | 1.80808068  | 0.03790348  | 8.1972161e-238 | 0              | 0.014787561 |
| P05943 | S100a10   | Protein S100-A10                                                 | 76.63   | 17.89 | 11075  | 1  | 0.00580994 | 2.48181249  | 0.03790348  | 3.1070885e-237 | 0              | 0.014787561 |
| P51432 | Plcb3     | 1-phosphatidylinositol 4,5-bisphosphate phosphodiesterase beta-3 | 298.04  | 7.46  | 139487 | 6  | 0.00581496 | 1.62950908  | 0.03790348  | 1.1760276e-236 | 0              | 0.014787561 |
| Q9CS42 | Prps2     | Ribose-phosphate pyrophosphokinase 2                             | 700.74  | 38.05 | 34786  | 13 | 0.00587493 | 1.71125473  | 0.038207118 | 4.4448586e-236 | 0              | 0.014906021 |
| Q8K2H2 | Otud6b    | Deubiquitinase OTUD6B                                            | 56.43   | 4.42  | 33758  | 1  | 0.0058903  | 1.72767252  | 0.038220034 | 1.6775472e-235 | 0              | 0.01491106  |
| D3ZZW6 | Hils1     | Spermatid-specific linker histone H1-like protein                | 37.27   | 4.14  | 18617  | 1  | 0.00591348 | 2.68232286  | 0.038283439 | 6.3221935e-235 | 0              | 0.014935797 |
| Q9ESL4 | Map3k20   | Mitogen-activated protein kinase kinase kinase 20                | 49.37   | 1.37  | 91720  | 1  | 0.00596638 | 2.41320931  | 0.038370568 | 2.3792326e-234 | 0              | 0.014969789 |
| O89017 | Lgmn      | Legumain                                                         | 53.01   | 2.76  | 49373  | 1  | 0.00600115 | 3.92173995  | 0.038370568 | 8.9409154e-234 | 0              | 0.014969789 |
| Q8BY71 | Hat1      | Histone acetyltransferase type B catalytic subunit               | 346.34  | 15.62 | 49278  | 5  | 0.00600157 | 2.87820968  | 0.038370568 | 3.3550799e-233 | 0              | 0.014969789 |
| Q8C3J5 | Dock2     | Dedicator of cytokinesis protein 2                               | 377.72  | 5.36  | 211704 | 8  | 0.00600651 | 2.06353638  | 0.038370568 | 1.2571856e-232 | 0              | 0.014969789 |
| Q1HFZ0 | Nsun2     | tRNA (cytosine(34)-C(5))-methyltransferase                       | 493     | 18.49 | 85452  | 10 | 0.00600721 | 1.95173314  | 0.038370568 | 4.7040451e-232 | 0              | 0.014969789 |
| Q3THK7 | Gmps      | GMP synthase [glutamine-hydrolyzing]                             | 1087.14 | 43.43 | 76723  | 20 | 0.00601656 | 1.79927283  | 0.038370568 | 1.7575954e-231 | 0              | 0.014969789 |
| P80314 | Cct2      | T-complex protein 1 subunit beta                                 | 2029.75 | 64.3  | 57477  | 32 | 0.00602102 | 1.5886182   | 0.038370568 | 6.5575491e-231 | 0              | 0.014969789 |
| Q8VCW8 | Acsf2     | Acyl-CoA synthetase family member 2, mitochondrial               | 249.2   | 13.33 | 67951  | 4  | 0.00604673 | 2.54824818  | 0.038448604 | 2.443089e-230  | 0              | 0.015000234 |
| P35564 | Canx      | Calnexin                                                         | 1249.29 | 39.09 | 67278  | 21 | 0.00607282 | 0.70920296  | 0.038528677 | 9.0889128e-230 | 0              | 0.015031473 |
| O70145 | Ncf2      | Neutrophil cytosol factor 2                                      | 518.48  | 29.14 | 59485  | 11 | 0.00612114 | 1.82646108  | 0.038749146 | 3.3764426e-229 | 0              | 0.015117487 |
| P80313 | Cct7      | T-complex protein 1 subunit eta                                  | 2365.11 | 69.49 | 59652  | 36 | 0.00613542 | 1.79371213  | 0.038753567 | 1.2525107e-228 | 0              | 0.015119211 |
| B0BNG0 | Emc2      | ER membrane protein complex subunit 2                            | 242.95  | 17.51 | 34870  | 5  | 0.00617306 | 1.69974962  | 0.038897505 | 4.6395725e-228 | 0              | 0.015175367 |
| P14824 | Anxa6     | Annexin A6                                                       | 682.14  | 21.25 | 75885  | 13 | 0.00618545 | 1.42647901  | 0.038897505 | 1.7161247e-227 | 0              | 0.015175367 |
| Q4V886 | Paf1      | RNA polymerase II-associated factor 1 homolog                    | 70.45   | 2.62  | 60546  | 1  | 0.00621353 | 7.51116E-06 | 0.038915271 | 6.3386077e-227 | 0              | 0.015182298 |
| Q9D2R0 | Aacs      | Acetoacetyl-CoA synthetase                                       | 118.49  | 4.17  | 75200  | 3  | 0.00621554 | 2.28281804  | 0.038915271 | 2.3378301e-226 | 0              | 0.015182298 |
| Q7TSV4 | Pgm2      | Phosphoglucomutase-2                                             | 95.08   | 3.23  | 68748  | 2  | 0.00628131 | 3.07168053  | 0.039241016 | 8.610054e-226  | 0              | 0.015309383 |
| P53042 | Ppp5c     | Serine/threonine-protein phosphatase 5                           | 219.69  | 9.02  | 56917  | 3  | 0.00629786 | 2.99414961  | 0.03925848  | 3.1664492e-225 | 4.9406565e-324 | 0.015316197 |
| B0BNE2 | Polr2e    | DNA-directed RNA polymerases I, II, and III subunit RPABC1       | 117.41  | 11.43 | 24570  | 2  | 0.00634737 | 0.71244263  | 0.039480913 | 1.1628207e-224 | 3.4584595e-323 | 0.015402976 |
| Q3UND0 | Skap2     | Src kinase-associated phosphoprotein 2                           | 54.93   | 5.59  | 40712  | 2  | 0.00641339 | 1.56424109  | 0.039804865 | 4.26409e-224   | 2.1738888e-322 | 0.015529362 |
| P39052 | Dnm2      | Dynamin-2                                                        | 959.39  | 24.6  | 98230  | 19 | 0.00649374 | 1.48021129  | 0.040060754 | 1.5613966e-223 | 1.3685618e-321 | 0.015629194 |
| O89112 | Lanc11    | LanC-like protein 1                                              | 112.57  | 6.02  | 45341  | 2  | 0.00649552 | 3.288913    | 0.040060754 | 5.7091729e-223 | 8.4831071e-321 | 0.015629194 |
| Q9R0C8 | Vav3      | Guanine nucleotide exchange factor VAV3                          | 65.16   | 3.54  | 97968  | 2  | 0.00650475 | 1.91878783  | 0.040060754 | 2.0845202e-222 | 5.2593288e-320 | 0.015629194 |
| O35643 | Ap1b1     | AP-1 complex subunit beta-1                                      | 1039.42 | 27.47 | 103935 | 18 | 0.00651075 | 1.59468982  | 0.040060754 | 7.5999683e-222 | 3.2556456e-319 | 0.015629194 |
| Q3UH60 | Dip2b     | Disco-interacting protein 2 homolog B                            | 317.4   | 5.84  | 171126 | 6  | 0.00658312 | 1.95046962  | 0.040351382 | 2.7668784e-221 | 2.0124134e-318 | 0.015742579 |
| P32233 | Drg1      | Developmentally-regulated GTP-binding protein 1                  | 303.57  | 16.08 | 40512  | 5  | 0.00659155 | 1.86633573  | 0.040351382 | 1.0058677e-220 | 1.2358988e-317 | 0.015742579 |
| Q09200 | B4galnt1  | Beta-1,4 N-acetylgalactosaminyltransferase 1                     | 113.11  | 9.94  | 59212  | 3  | 0.00660038 | 0.57383532  | 0.040351382 | 3.6514378e-220 | 7.5779621e-317 | 0.015742579 |
| P60229 | Eif3e     | Eukaryotic translation initiation factor 3 subunit E             | 372.73  | 20.9  | 52221  | 8  | 0.00664188 | 2.65007207  | 0.040518288 | 1.3236072e-219 | 4.6388753e-316 | 0.015807695 |
| P42567 | Eps15     | Epidermal growth factor receptor substrate 15                    | 51.17   | 1.23  | 98471  | 1  | 0.00672896 | 4.26915804  | 0.040962031 | 4.7910013e-219 | 2.8281219e-315 | 0.015980815 |
| Q6NSR8 | Npepl1    | Probable aminopeptidase NPEPL1                                   | 286.72  | 11.83 | 55940  | 5  | 0.00674902 | 2.70859917  | 0.040996699 | 1.7316706e-218 | 1.7113945e-314 | 0.015994341 |
| Q64261 | Cdk6      | Cyclin-dependent kinase 6                                        | 254.71  | 26.69 | 37028  | 6  | 0.00678524 | 2.52218393  | 0.041064236 | 6.2499412e-218 | 1.0331007e-313 | 0.01602069  |
| Q9CQR4 | Acot13    | Acyl-coenzyme A thioesterase 13                                  | 263.81  | 37.86 | 15183  | 4  | 0.0067889  | 2.48767397  | 0.041064236 | 2.2524651e-217 | 6.2138844e-313 | 0.01602069  |
| Q99K51 | Pls3      | Plastin-3                                                        | 1330.34 | 41.43 | 70742  | 22 | 0.00688462 | 2.0927534   | 0.041523429 | 8.106092e-217  | 3.7329349e-312 | 0.016199838 |
| Q8BTW3 | Exosc6    | Exosome complex component MTR3                                   | 56.69   | 5.86  | 28370  | 1  | 0.00691842 | 0.39687868  | 0.041523429 | 2.9129709e-216 | 2.2248534e-311 | 0.016199838 |
| Q8VDM4 | Psmc2     | 26S proteasome non-ATPase regulatory subunit 2                   | 1200.03 | 30.95 | 100203 | 20 | 0.00692264 | 1.85454293  | 0.041523429 | 1.0452779e-215 | 1.3215541e-310 | 0.016199838 |
| Q9D8Y7 | Tnfaip8l2 | Tumor necrosis factor alpha-induced protein 8-like protein 2     | 57.02   | 7.61  | 20615  | 1  | 0.006923   | 3.07061172  | 0.041523429 | 3.7454e-215    | 7.8401195e-310 | 0.016199838 |
| O08700 | Vps45     | Vacuolar protein sorting-associated protein 45                   | 226.2   | 8.95  | 64894  | 4  | 0.00696473 | 2.28487688  | 0.041686159 | 1.3400942e-214 | 4.6465849e-309 | 0.016263325 |
| Q9ERK4 | Cse11     | Exportin-2                                                       | 802.11  | 18.54 | 110455 | 15 | 0.00698213 | 2.79270048  | 0.041696537 | 4.7878761e-214 | 2.7430707e-308 | 0.016267374 |
| P27612 | Plaa      | Phospholipase A-2-activating protein                             | 554.38  | 17.76 | 87221  | 10 | 0.00699567 | 2.30887631  | 0.041696537 | 1.7081296e-213 | 1.6158023e-307 | 0.016267374 |
| Q9JKX6 | Nudt5     | ADP-sugar pyrophosphatase                                        | 97.17   | 13.3  | 23984  | 2  | 0.00701588 | 1.68523625  | 0.041729884 | 6.0851164e-213 | 9.4996446e-307 | 0.016280383 |



|        |          |                                                                                                           |         |       |        |    |            |            |             |                |                |             |
|--------|----------|-----------------------------------------------------------------------------------------------------------|---------|-------|--------|----|------------|------------|-------------|----------------|----------------|-------------|
| Q07813 | Bax      | Apoptosis regulator BAX                                                                                   | 354.61  | 40.62 | 21395  | 5  | 0.00703195 | 1.53482362 | 0.041738517 | 2.1646463e-212 | 5.571741e-306  | 0.016283752 |
| Q9QVP9 | Ptk2b    | Protein-tyrosine kinase 2-beta                                                                            | 324.75  | 7.63  | 115794 | 6  | 0.00707352 | 2.14264294 | 0.041898113 | 7.6890877e-212 | 3.2611218e-305 | 0.016346016 |
| Q9D0F9 | Pgm1     | Phosphoglucomutase-1                                                                                      | 431.85  | 17.08 | 61418  | 7  | 0.00712609 | 1.80880529 | 0.042073413 | 2.7272963e-211 | 1.9013555e-304 | 0.016414407 |
| A2A5R2 | Arfgef2  | Brefeldin A-inhibited guanine nucleotide-exchange protein 2                                               | 120.78  | 2.01  | 202240 | 3  | 0.00714558 | 2.0467609  | 0.042073413 | 9.6596034e-211 | 1.1034624e-303 | 0.016414407 |
| Q498R3 | Dnajc10  | DnaJ homolog subfamily C member 10                                                                        | 74.22   | 2.14  | 90747  | 2  | 0.00714732 | 2.76740814 | 0.042073413 | 3.4162966e-210 | 6.3892786e-303 | 0.016414407 |
| Q8BMP6 | Acbd3    | Golgi resident protein GCP60                                                                              | 395.69  | 20.76 | 60181  | 7  | 0.00724925 | 3.0110474  | 0.042585644 | 1.2064823e-209 | 3.6955387e-302 | 0.016614247 |
| Q8VBT6 | Apobr    | Apolipoprotein B receptor                                                                                 | 546.98  | 14.65 | 102705 | 12 | 0.00726428 | 1.75178986 | 0.042586272 | 4.2545663e-209 | 2.1206123e-301 | 0.016614492 |
| P50518 | Atp6v1e1 | V-type proton ATPase subunit E 1                                                                          | 463.81  | 41.59 | 26157  | 8  | 0.00731144 | 1.31380036 | 0.042714487 | 1.4981607e-208 | 1.214475e-300  | 0.016664514 |
| Q9QUJ7 | Acsl4    | Long-chain-fatty-acid--CoA ligase 4                                                                       | 825.24  | 29.68 | 79077  | 16 | 0.00733325 | 1.63895862 | 0.042714487 | 5.2678101e-208 | 6.9266083e-300 | 0.016664514 |
| P24135 | Plcg2    | 1-phosphatidylinositol 4,5-bisphosphate phosphodiesterase gamma-2                                         | 218.19  | 4.43  | 147735 | 6  | 0.00734223 | 2.23279835 | 0.042714487 | 1.8495677e-207 | 3.9409737e-299 | 0.016664514 |
| Q99P31 | Hspbp1   | Hsp70-binding protein 1                                                                                   | 459.18  | 32.21 | 39167  | 9  | 0.0073778  | 2.44276334 | 0.042714487 | 6.4845314e-207 | 2.2387801e-298 | 0.016664514 |
| Q61RU2 | Tpm4     | Tropomyosin alpha-4 chain                                                                                 | 814.48  | 43.15 | 28468  | 12 | 0.00738493 | 1.88688154 | 0.042714487 | 2.2701525e-206 | 1.2675801e-297 | 0.016664514 |
| Q61316 | Hspa4    | Heat shock 70 kDa protein 4                                                                               | 2312.93 | 56.84 | 94133  | 39 | 0.00742662 | 1.56171764 | 0.042714487 | 7.9359576e-206 | 7.1667003e-297 | 0.016664514 |
| Q61699 | Hsph1    | Heat shock protein 105 kDa                                                                                | 570.99  | 15.27 | 96407  | 10 | 0.00742817 | 2.21300297 | 0.042714487 | 2.7702015e-205 | 4.0369265e-296 | 0.016664514 |
| Q3THS6 | Mat2a    | S-adenosylmethionine synthase isoform type-2                                                              | 561.82  | 31.9  | 43689  | 12 | 0.00743236 | 2.05894028 | 0.042714487 | 9.6558585e-205 | 2.2715548e-295 | 0.016664514 |
| P27601 | Gna13    | Guanine nucleotide-binding protein subunit alpha-13                                                       | 45.3    | 2.65  | 44055  | 1  | 0.00744753 | 3.99742208 | 0.042714487 | 3.3607621e-204 | 1.2766151e-294 | 0.016664514 |
| Q4KLJ8 | Pdcl3    | Phosducin-like protein 3                                                                                  | 126.27  | 9.17  | 27699  | 2  | 0.00744758 | 2.57463968 | 0.042714487 | 1.1680241e-203 | 7.1605649e-294 | 0.016664514 |
| Q00612 | G6pdx    | Glucose-6-phosphate 1-dehydrogenase X                                                                     | 1594.54 | 58.83 | 59263  | 31 | 0.00745981 | 1.82258473 | 0.042714487 | 4.0535248e-203 | 4.0125087e-293 | 0.016664514 |
| Q9CT10 | Ranbp3   | Ran-binding protein 3                                                                                     | 374.52  | 16.9  | 52573  | 6  | 0.00748718 | 2.19859907 | 0.042714487 | 1.4046905e-202 | 2.2444952e-292 | 0.016664514 |
| Q9QUR6 | Prep     | Prolyl endopeptidase                                                                                      | 725.52  | 24.23 | 80752  | 13 | 0.00748951 | 1.96475625 | 0.042714487 | 4.8606581e-202 | 1.2520655e-291 | 0.016664514 |
| Q9ET30 | Tm9sf3   | Transmembrane 9 superfamily member 3                                                                      | 116.02  | 8.18  | 67545  | 3  | 0.00749561 | 0.51363566 | 0.042714487 | 1.6794842e-201 | 6.9767065e-291 | 0.016664514 |
| Q6P5D8 | Smchd1   | Structural maintenance of chromosomes flexible hinge domain-containing protein 1                          | 692.49  | 7.32  | 225648 | 12 | 0.00755937 | 0.34586263 | 0.042992008 | 5.794594e-201  | 3.8822363e-290 | 0.016772785 |
| Q6NVF4 | Helb     | DNA helicase B                                                                                            | 41.27   | 0.74  | 121471 | 1  | 0.00759081 | 4.47623684 | 0.043085006 | 1.9963476e-200 | 2.1493267e-289 | 0.016809067 |
| Q8BMF4 | Dlat     | Dihydropyridyllysine-residue acetyltransferase component of pyruvate dehydrogenase complex, mitochondrial | 479.33  | 18.85 | 67942  | 9  | 0.00762104 | 1.28251584 | 0.043170798 | 6.8677608e-200 | 1.186388e-288  | 0.016842538 |
| P22892 | Ap1g1    | AP-1 complex subunit gamma-1                                                                              | 370.12  | 10.71 | 91350  | 7  | 0.00766437 | 1.73593007 | 0.043330274 | 2.3591733e-199 | 6.5296922e-288 | 0.016904755 |
| P12368 | Prkar2a  | cAMP-dependent protein kinase type II-alpha regulatory subunit                                            | 251.98  | 12.97 | 45480  | 4  | 0.0076977  | 2.19849552 | 0.043361306 | 8.0922636e-199 | 3.5804989e-287 | 0.016916862 |
| P61965 | Wdr5     | WD repeat-containing protein 5                                                                            | 83.17   | 4.19  | 36588  | 1  | 0.00770024 | 3.20484955 | 0.043361306 | 2.7716954e-198 | 1.9573168e-286 | 0.016916862 |
| Q5DW34 | Ehmt1    | Histone-lysine N-methyltransferase EHMT1                                                                  | 52.54   | 1.16  | 141999 | 1  | 0.00772537 | 11.2651619 | 0.043417207 | 9.4795142e-198 | 1.0687862e-285 | 0.016938671 |
| Q80VA0 | Galnt7   | N-acetylgalactosaminyltransferase 7                                                                       | 196.84  | 8.98  | 75419  | 4  | 0.00776906 | 1.87753973 | 0.04349956  | 3.2373644e-197 | 5.8212343e-285 | 0.0169708   |
| P84083 | Arf5     | ADP-ribosylation factor 5                                                                                 | 687.26  | 48.89 | 20530  | 9  | 0.00777684 | 1.68582208 | 0.04349956  | 1.1039815e-196 | 3.158882e-284  | 0.0169708   |
| Q9CPV4 | Glod4    | Glyoxalase domain-containing protein 4                                                                    | 677.95  | 56.71 | 33317  | 16 | 0.00779255 | 2.2280222  | 0.04349956  | 3.7592099e-196 | 1.7116793e-283 | 0.0169708   |
| P70698 | Ctps1    | CTP synthase 1                                                                                            | 300.54  | 13.54 | 66682  | 6  | 0.00780097 | 1.9806349  | 0.04349956  | 1.2781908e-195 | 9.2569454e-283 | 0.0169708   |
| P51859 | Hdgf     | Hepatoma-derived growth factor                                                                            | 430.74  | 49.37 | 26269  | 8  | 0.007835   | 1.62608083 | 0.043604121 | 4.3396923e-195 | 4.9988009e-282 | 0.017011593 |
| P43274 | Hist1h1e | Histone H1.4                                                                                              | 777.19  | 34.25 | 21977  | 12 | 0.00789738 | 0.61398814 | 0.043694806 | 1.4712489e-194 | 2.6911003e-281 | 0.017046973 |
| Q91X52 | Dcxr     | L-xylulose reductase                                                                                      | 44.07   | 4.51  | 25746  | 1  | 0.00790074 | 2.48875894 | 0.043694806 | 4.9805476e-194 | 1.441818e-280  | 0.017046973 |
| P62748 | Hpcal1   | Hippocalcin-like protein 1                                                                                | 58.64   | 16.58 | 22338  | 2  | 0.00790613 | 3.51028734 | 0.043694806 | 1.6835717e-193 | 7.7158209e-280 | 0.017046973 |
| P63101 | Ywhaz    | 14-3-3 protein zeta/delta                                                                                 | 956.45  | 48.98 | 27771  | 14 | 0.00791251 | 2.90642923 | 0.043694806 | 5.6826316e-193 | 4.1237328e-279 | 0.017046973 |
| Q92111 | Tf       | Serotransferrin                                                                                           | 119.06  | 4.3   | 76724  | 3  | 0.00793863 | 1.65656428 | 0.043754438 | 1.9152724e-192 | 2.2009417e-278 | 0.017070237 |
| Q5DU25 | Iqsec2   | IQ motif and SEC7 domain-containing protein 2                                                             | 50.7    | 0.54  | 161787 | 1  | 0.00797284 | 2.84902321 | 0.043779416 | 6.4457666e-192 | 1.1716963e-277 | 0.017079982 |
| D3ZLZ7 | Impdh1   | Inosine-5'-monophosphate dehydrogenase 1                                                                  | 229.12  | 6.61  | 55293  | 4  | 0.00797383 | 2.38931879 | 0.043779416 | 2.1661142e-191 | 6.2187164e-277 | 0.017079982 |
| Q5M947 | Rrp15    | RRP15-like protein                                                                                        | 54.1    | 3.93  | 30926  | 1  | 0.00809593 | 0.35165675 | 0.044266744 | 7.268599e-191  | 3.2971456e-276 | 0.017270107 |
| Q91WQ3 | Yars     | Tyrosine--tRNA ligase, cytoplasmic                                                                        | 429.69  | 22.92 | 59105  | 10 | 0.00811271 | 1.82973205 | 0.044266744 | 2.435468e-190  | 1.7337307e-275 | 0.017270107 |



|        |          |                                                                        |         |       |        |    |            |            |             |                |                |             |
|--------|----------|------------------------------------------------------------------------|---------|-------|--------|----|------------|------------|-------------|----------------|----------------|-------------|
| O70310 | Nmt1     | Glycylpeptide N-tetradecanoyltransferase 1                             | 726.13  | 33.47 | 56888  | 12 | 0.0081221  | 1.4438214  | 0.044266744 | 8.1484746e-190 | 9.0985749e-275 | 0.017270107 |
| Q5SUR0 | Pfas     | Phosphoribosylformylglycinamide synthase                               | 1007.33 | 19.67 | 144629 | 19 | 0.00814288 | 1.60053424 | 0.044266744 | 2.722276e-189  | 4.7676419e-274 | 0.017270107 |
| Q9CXY6 | Ilf2     | Interleukin enhancer-binding factor 2                                  | 529.81  | 37.18 | 43062  | 9  | 0.00815448 | 0.66749114 | 0.044266744 | 9.0813364e-189 | 2.4927617e-273 | 0.017270107 |
| Q6GX84 | Fignl1   | Fidgetin-like protein 1                                                | 90.19   | 2.81  | 74197  | 2  | 0.00815562 | 1.74604472 | 0.044266744 | 3.0250247e-188 | 1.3011877e-272 | 0.017270107 |
| Q8R4X3 | Rbm12    | RNA-binding protein 12                                                 | 166.15  | 4.03  | 102796 | 4  | 0.00823532 | 2.65476049 | 0.044561968 | 1.0061655e-187 | 6.7849676e-272 | 0.017385285 |
| P47197 | Akt2     | RAC-beta serine/threonine-protein kinase                               | 47.76   | 1.66  | 55543  | 1  | 0.00824123 | 4.43865191 | 0.044561968 | 3.3417279e-187 | 3.5181306e-271 | 0.017385285 |
| Q3UGP9 | Lrrc58   | Leucine-rich repeat-containing protein 58                              | 61.05   | 6.01  | 40139  | 2  | 0.00829761 | 0.48185285 | 0.044721368 | 1.1082396e-186 | 1.8218202e-270 | 0.017447473 |
| Q8C052 | Map1s    | Microtubule-associated protein 1S                                      | 144.55  | 3.8   | 102939 | 3  | 0.00831686 | 2.34691435 | 0.044721368 | 3.6699235e-186 | 9.3942528e-270 | 0.017447473 |
| P68368 | Tuba4a   | Tubulin alpha-4A chain                                                 | 2081.07 | 60.27 | 49924  | 30 | 0.0083177  | 1.74684098 | 0.044721368 | 1.213503e-185  | 4.8341145e-269 | 0.017447473 |
| Q91VW3 | Sh3bgrl3 | SH3 domain-binding glutamic acid-rich-like protein 3                   | 216.58  | 31.18 | 10477  | 4  | 0.0083763  | 1.75594361 | 0.04495176  | 4.0066833e-185 | 2.4850131e-268 | 0.017537358 |
| Q9WV03 | Fam50a   | Protein FAM50A                                                         | 137.26  | 12.68 | 40252  | 3  | 0.00841496 | 2.0112012  | 0.045074527 | 1.3209588e-184 | 1.2719326e-267 | 0.017585254 |
| P62908 | Rps3     | 40S ribosomal protein S3                                               | 1407.47 | 75.72 | 26674  | 25 | 0.00847714 | 1.6575241  | 0.045322562 | 4.3486399e-184 | 6.4897016e-267 | 0.017682021 |
| P35700 | Prdx1    | Peroxiredoxin-1                                                        | 1457.55 | 86.43 | 22176  | 26 | 0.00851502 | 1.7836262  | 0.045358962 | 1.4294774e-183 | 3.2964129e-266 | 0.017696222 |
| Q9CX56 | Psm8     | 26S proteasome non-ATPase regulatory subunit 8                         | 187.68  | 7.08  | 39930  | 3  | 0.00851573 | 1.45787063 | 0.045358962 | 4.6920281e-183 | 1.6692328e-265 | 0.017696222 |
| Q64701 | Rbl1     | Retinoblastoma-like protein 1                                          | 57.19   | 0.85  | 119456 | 1  | 0.00853333 | 3.37485456 | 0.045368082 | 1.5378118e-182 | 8.4441221e-265 | 0.01769978  |
| Q2NL51 | Gsk3a    | Glycogen synthase kinase-3 alpha                                       | 158.97  | 8.16  | 51661  | 3  | 0.00860333 | 5.96627909 | 0.045655236 | 5.0327435e-182 | 4.263287e-264  | 0.01781181  |
| Q8VEE4 | Rpa1     | Replication protein A 70 kDa DNA-binding subunit                       | 669.48  | 23.76 | 69037  | 13 | 0.00864025 | 1.28815915 | 0.045766094 | 1.6446188e-181 | 2.1420442e-263 | 0.01785506  |
| P50247 | Ahcy     | Adenosylhomocysteinase                                                 | 1277.03 | 48.15 | 47688  | 19 | 0.00865937 | 1.81062348 | 0.045782389 | 5.3664158e-181 | 1.0730241e-262 | 0.017861417 |
| Q9R1T2 | Sae1     | SUMO-activating enzyme subunit 1                                       | 772     | 46.57 | 38620  | 14 | 0.00873978 | 2.02017821 | 0.046057779 | 1.7484845e-180 | 5.3643262e-262 | 0.017968857 |
| Q6ZQM8 | Ugt1a7c  | UDP-glucuronosyltransferase 1-7C                                       | 575.4   | 31.83 | 59758  | 14 | 0.00874372 | 1.75032137 | 0.046057779 | 5.6884957e-180 | 2.6674631e-261 | 0.017968857 |
| Q922L6 | Nelfcd   | Negative elongation factor D                                           | 77.28   | 3.05  | 66276  | 2  | 0.00876471 | 3.16344213 | 0.046079438 | 1.8479536e-179 | 1.3248596e-260 | 0.017977307 |
| O70593 | Sgta     | Small glutamine-rich tetratricopeptide repeat-containing protein alpha | 316.14  | 23.89 | 34157  | 6  | 0.00879279 | 1.81703353 | 0.046079438 | 5.9943544e-179 | 6.5664171e-260 | 0.017977307 |
| P80317 | Cct6a    | T-complex protein 1 subunit zeta                                       | 1456.67 | 53.3  | 58004  | 26 | 0.00881098 | 1.62161497 | 0.046079438 | 1.9415622e-178 | 3.2464596e-259 | 0.017977307 |
| Q8C1Y8 | Cez1     | Vacuolar fusion protein CCZ1 homolog                                   | 43.23   | 2.71  | 55505  | 1  | 0.00881627 | 3.09008039 | 0.046079438 | 6.2793908e-178 | 1.6019421e-258 | 0.017977307 |
| Q922B2 | Dars     | Aspartate--tRNA ligase, cytoplasmic                                    | 1347.24 | 53.09 | 57147  | 25 | 0.00882853 | 1.64928121 | 0.046079438 | 2.0278732e-177 | 7.8947668e-258 | 0.017977307 |
| O08759 | Ube3a    | Ubiquitin-protein ligase E3A                                           | 54.96   | 3.33  | 99819  | 2  | 0.00889535 | 2.37493975 | 0.046263788 | 6.5391448e-177 | 3.8844099e-257 | 0.018049229 |
| Q8K183 | Pdxk     | Pyridoxal kinase                                                       | 258.76  | 17.31 | 35015  | 5  | 0.00889626 | 2.83510027 | 0.046263788 | 2.1055122e-176 | 1.9025883e-256 | 0.018049229 |
| P23514 | Copb1    | Coatomer subunit beta                                                  | 657.7   | 17.52 | 107011 | 13 | 0.00894391 | 2.20636821 | 0.046427042 | 6.7694124e-176 | 9.3094049e-256 | 0.01811292  |
| Q64674 | Srm      | Spermidine synthase                                                    | 395.57  | 28.48 | 33995  | 7  | 0.008966   | 1.90247721 | 0.046457205 | 2.1732035e-175 | 4.5392536e-255 | 0.018124688 |
| P43275 | Hist1h1a | Histone H1.1                                                           | 511.19  | 36.15 | 21785  | 9  | 0.00899657 | 0.54657376 | 0.046531161 | 6.9663579e-175 | 2.2086206e-254 | 0.018153541 |
| P51174 | Acadl    | Long-chain specific acyl-CoA dehydrogenase, mitochondrial              | 1052.21 | 40.47 | 47908  | 18 | 0.00904715 | 1.68121502 | 0.046670692 | 2.2298052e-174 | 1.0718661e-253 | 0.018207977 |
| Q5U317 | Fip1l1   | Pre-mRNA 3'-end-processing factor FIP1                                 | 292.11  | 14.55 | 60188  | 5  | 0.00905624 | 0.62775349 | 0.046670692 | 7.1266195e-174 | 5.1831511e-253 | 0.018207977 |
| Q9WUP7 | Uchl5    | Ubiquitin carboxyl-terminal hydrolase isozyme L5                       | 663.04  | 37.99 | 37617  | 14 | 0.00918017 | 2.19321169 | 0.047192963 | 2.2743407e-173 | 2.5027677e-252 | 0.018411734 |
| P99028 | Uqcrh    | Cytochrome b-c1 complex subunit 6, mitochondrial                       | 49.72   | 20.22 | 10435  | 1  | 0.00919064 | 0.54476739 | 0.047192963 | 7.2474051e-173 | 1.199656e-251  | 0.018411734 |
| Q8CI08 | Slain2   | SLAIN motif-containing protein 2                                       | 79.49   | 4.13  | 62378  | 2  | 0.00925236 | 3.62775023 | 0.047370802 | 2.306027e-172  | 5.7417064e-251 | 0.018481116 |
| P24155 | Thop1    | Thimet oligopeptidase                                                  | 192.1   | 5.53  | 78385  | 4  | 0.00927121 | 2.92439622 | 0.047370802 | 7.3265724e-172 | 2.736633e-250  | 0.018481116 |
| P17439 | Gba      | Glucosylceramidase                                                     | 214.42  | 21.55 | 57622  | 5  | 0.00927505 | 1.77693728 | 0.047370802 | 2.3242973e-171 | 1.3019256e-249 | 0.018481116 |
| Q3UHX2 | Pdap1    | 28 kDa heat- and acid-stable phosphoprotein                            | 353.81  | 22.65 | 20605  | 5  | 0.00935367 | 2.23264295 | 0.047686992 | 7.3626924e-171 | 6.1865894e-249 | 0.018604474 |
| P11103 | Parp1    | Poly [ADP-ribose] polymerase 1                                         | 976.93  | 25.77 | 113100 | 18 | 0.00937351 | 1.33999928 | 0.047702986 | 2.328818e-170  | 2.9253847e-248 | 0.018610713 |
| P40336 | Vps26a   | Vacuolar protein sorting-associated protein 26A                        | 200.22  | 22.63 | 38114  | 5  | 0.00943266 | 2.28137785 | 0.047918563 | 7.3550921e-170 | 1.3805916e-247 | 0.018694818 |
| Q6A0A2 | Larp4b   | La-related protein 4B                                                  | 64.5    | 2.29  | 81627  | 1  | 0.0096202  | 5.40469251 | 0.048784471 | 2.3194987e-169 | 6.4901253e-247 | 0.019032641 |
| P56380 | Nudt2    | Bis(5'-nucleosyl)-tetraphosphatase [asymmetrical]                      | 58.76   | 5.44  | 16989  | 1  | 0.00967413 | 2.79225382 | 0.04897099  | 7.3038753e-169 | 3.0202055e-246 | 0.019105409 |
| Q9CWK8 | Snx2     | Sorting nexin-2                                                        | 1284.68 | 44.12 | 58471  | 21 | 0.00969647 | 1.74338279 | 0.048997208 | 2.2964953e-168 | 1.4004721e-245 | 0.019115637 |
| Q9CYG7 | Tom34    | Mitochondrial import receptor subunit TOM34                            | 300.82  | 26.54 | 34278  | 6  | 0.0097182  | 1.72660016 | 0.049020256 | 7.2099207e-168 | 6.480853e-245  | 0.019124629 |

|        |          |                                                       |         |       |        |    |            |            |             |                |                |             |
|--------|----------|-------------------------------------------------------|---------|-------|--------|----|------------|------------|-------------|----------------|----------------|-------------|
| Q91W89 | Man2c1   | Alpha-mannosidase 2C1                                 | 183.08  | 4.33  | 115688 | 4  | 0.00981014 | 2.52637608 | 0.049323746 | 2.2602055e-167 | 2.9931144e-244 | 0.019243032 |
| P97823 | Lypla1   | Acyl-protein thioesterase 1                           | 243.92  | 26.52 | 24688  | 4  | 0.00981292 | 2.20438901 | 0.049323746 | 7.0748565e-167 | 1.374989e-243  | 0.019243032 |
| Q62448 | Eif4g2   | Eukaryotic translation initiation factor 4 gamma 2    | 512.45  | 14.68 | 102106 | 10 | 0.00983686 | 1.94889311 | 0.049357167 | 2.2112577e-166 | 6.3096459e-243 | 0.019256071 |
| Q91Y10 | Asl      | Argininosuccinate lyase                               | 446.52  | 23.28 | 51739  | 9  | 0.00986581 | 4.56989509 | 0.049415604 | 6.9010135e-166 | 2.889387e-242  | 0.01927887  |
| Q6AYE2 | Sh3glb1  | Endophilin-B1                                         | 109.03  | 6.85  | 40787  | 2  | 0.00990486 | 2.39746185 | 0.049524303 | 2.1504925e-165 | 1.3200797e-241 | 0.019321277 |
| Q9ER72 | Cars     | Cysteine--tRNA ligase, cytoplasmic                    | 507.15  | 14.56 | 94860  | 9  | 0.00992589 | 2.33597751 | 0.049542707 | 6.6913585e-165 | 6.0143013e-241 | 0.019328457 |
| P46460 | Nsf      | Vesicle-fusing ATPase                                 | 1002.63 | 26.75 | 82613  | 17 | 0.00995622 | 1.26470001 | 0.049572733 | 2.0789389e-164 | 2.7348227e-240 | 0.019340171 |
| O35303 | Dnm1l    | Dynamin-1-like protein                                | 296.86  | 8.61  | 83908  | 6  | 0.00996664 | 2.26018515 | 0.049572733 | 6.4494097e-164 | 1.2406388e-239 | 0.019340171 |
| P56135 | Atp5mf   | ATP synthase subunit f, mitochondrial                 | 131.47  | 23.86 | 10344  | 3  | 0.01000115 | 1.42431291 | 0.049657904 | 1.9977851e-163 | 5.6200018e-239 | 0.0193734   |
| Q91VZ6 | Smap1    | Stromal membrane-associated protein 1                 | 106.19  | 5.68  | 47660  | 2  | 0.01005484 | 2.97474016 | 0.049837784 | 6.1791384e-163 | 2.539324e-238  | 0.019443577 |
| Q8CFV9 | Rfk      | Riboflavin kinase                                     | 59.68   | 13.55 | 17437  | 1  | 0.01020291 | 4.88295617 | 0.050484058 | 1.9083461e-162 | 1.143433e-237  | 0.019695713 |
| Q9CWZ7 | Napg     | Gamma-soluble NSF attachment protein                  | 48.97   | 4.17  | 34732  | 1  | 0.01024024 | 1.71508966 | 0.050581116 | 5.884861e-162  | 5.109279e-237  | 0.019733579 |
| Q7TSS2 | Ube2q1   | Ubiquitin-conjugating enzyme E2 Q1                    | 38.05   | 1.9   | 46173  | 1  | 0.01029236 | 3.67344469 | 0.050682277 | 1.8120278e-161 | 2.2770127e-236 | 0.019773046 |
| Q8BV14 | Qdpr     | Dihydropteridine reductase                            | 199.9   | 26.56 | 25570  | 4  | 0.01029954 | 1.90806325 | 0.050682277 | 5.5711244e-161 | 1.0114487e-235 | 0.019773046 |
| Q9JL16 | Scly     | Selenocysteine lyase                                  | 153.62  | 15.97 | 47174  | 4  | 0.01032159 | 2.1785711  | 0.050682277 | 1.7102907e-160 | 4.4871575e-235 | 0.019773046 |
| Q9Z0R6 | Its2     | Intersectin-2                                         | 44.16   | 0.72  | 188908 | 1  | 0.01033173 | 2.76783894 | 0.050682277 | 5.2425897e-160 | 1.9868235e-234 | 0.019773046 |
| Q80U87 | Usp8     | Ubiquitin carboxyl-terminal hydrolase 8               | 305.92  | 7.96  | 122611 | 7  | 0.01038526 | 1.98851831 | 0.050857504 | 1.6046133e-159 | 8.7849359e-234 | 0.019841408 |
| Q8R180 | Ero1a    | ERO1-like protein alpha                               | 441.46  | 17.89 | 54084  | 8  | 0.01043578 | 2.48756702 | 0.051017362 | 4.9039186e-159 | 3.871451e-233  | 0.019903775 |
| P42225 | Stat1    | Signal transducer and activator of transcription 1    | 206.83  | 6.54  | 87197  | 3  | 0.01049524 | 2.8001083  | 0.051067819 | 1.4964568e-158 | 1.7007052e-232 | 0.01992346  |
| Q9D903 | Ebna1bp2 | Probable rRNA-processing protein EBP2                 | 147.95  | 10.46 | 34703  | 3  | 0.01050731 | 0.53196447 | 0.051067819 | 4.5596654e-158 | 7.4445838e-232 | 0.01992346  |
| Q8CBW3 | Abi1     | Abl interactor 1                                      | 99.73   | 6.44  | 52288  | 2  | 0.01054079 | 2.09126469 | 0.051067819 | 1.3872328e-157 | 3.2539503e-231 | 0.01992346  |
| P61202 | Cops2    | COP9 signalosome complex subunit 2                    | 73.66   | 2.93  | 51597  | 1  | 0.01055102 | 3.59443156 | 0.051067819 | 4.2141794e-157 | 1.4188494e-230 | 0.01992346  |
| Q3V1V3 | Esf1     | ESF1 homolog                                          | 48.98   | 1.42  | 98048  | 1  | 0.01055273 | 2.18722877 | 0.051067819 | 1.2782735e-156 | 6.1781164e-230 | 0.01992346  |
| P48193 | Epb41    | Protein 4.1                                           | 214.64  | 8.16  | 95911  | 6  | 0.01055574 | 1.349381   | 0.051067819 | 3.8715185e-156 | 2.6873857e-229 | 0.01992346  |
| Q64737 | Gart     | Trifunctional purine biosynthetic protein adenosine-3 | 1890.06 | 40.79 | 107503 | 29 | 0.01057131 | 1.70642623 | 0.051067819 | 1.1708074e-155 | 1.1677037e-228 | 0.01992346  |
| P47753 | Capza1   | F-actin-capping protein subunit alpha-1               | 320.89  | 34.27 | 32940  | 6  | 0.01062661 | 1.68157705 | 0.051248248 | 3.535378e-155  | 5.0655607e-228 | 0.019993852 |
| Q80X13 | Eif4g3   | Eukaryotic translation initiation factor 4 gamma 3    | 376.54  | 4.5   | 174890 | 9  | 0.01064948 | 2.12805172 | 0.051271965 | 1.0659389e-154 | 2.1901447e-227 | 0.020003105 |
| Q9CZ30 | Ola1     | Obg-like ATPase 1                                     | 564.72  | 28.03 | 44730  | 9  | 0.01069915 | 0.28774723 | 0.051424371 | 3.2090355e-154 | 9.4509775e-227 | 0.020062564 |
| Q05144 | Rac2     | Ras-related C3 botulinum toxin substrate 2            | 569.5   | 55.21 | 21441  | 10 | 0.01077756 | 1.56689397 | 0.051714186 | 9.6463332e-154 | 4.0657846e-226 | 0.020175632 |
| P63028 | Tpt1     | Translationally-controlled tumor protein              | 252.57  | 44.19 | 19462  | 4  | 0.01081335 | 3.1603284  | 0.051798862 | 2.8953112e-153 | 1.7416201e-225 | 0.020208667 |
| Q8BVY0 | Rsl1d1   | Ribosomal L1 domain-containing protein 1              | 1118.56 | 40.71 | 50421  | 14 | 0.01085156 | 0.56861849 | 0.05189481  | 8.6770723e-153 | 7.4420608e-225 | 0.0202461   |
| P46737 | Brec3    | Lys-63-specific deubiquitinase BRCC36                 | 128.43  | 8.25  | 33340  | 2  | 0.01090307 | 3.6474222  | 0.052053938 | 2.5965453e-152 | 3.1719213e-224 | 0.020308182 |
| P61982 | Ywhag    | 14-3-3 protein gamma                                  | 778.16  | 50.2  | 28303  | 14 | 0.01102109 | 3.43726853 | 0.052529547 | 7.7582374e-152 | 1.3477315e-223 | 0.020493735 |
| Q9CY64 | Blvra    | Biliverdin reductase A                                | 357.3   | 18.64 | 33525  | 7  | 0.01106153 | 1.75723674 | 0.052600291 | 2.3145918e-151 | 5.6931086e-223 | 0.020521335 |
| Q3UQ44 | Iqgap2   | Ras GTPase-activating-like protein IQGAP2             | 100.96  | 1.14  | 180528 | 2  | 0.01107308 | 2.46881522 | 0.052600291 | 6.8949273e-151 | 2.3986256e-222 | 0.020521335 |
| P52760 | Rida     | 2-iminobutanoate/2-iminopropanoate deaminase          | 141.2   | 29.63 | 14255  | 3  | 0.01109614 | 2.70692612 | 0.052600291 | 2.0508251e-150 | 1.0091554e-221 | 0.020521335 |
| Q8R016 | Blmh     | Bleomycin hydrolase                                   | 445.03  | 25.71 | 52511  | 9  | 0.01110962 | 3.00131526 | 0.052600291 | 6.0907524e-150 | 4.2377153e-221 | 0.020521335 |
| O09131 | Gsto1    | Glutathione S-transferase omega-1                     | 84.83   | 7.92  | 27498  | 2  | 0.01124545 | 2.38148677 | 0.053126803 | 1.8061607e-149 | 1.7768622e-220 | 0.020726747 |
| Q9CQV8 | Ywhab    | 14-3-3 protein beta/alpha                             | 847.91  | 48.37 | 28086  | 13 | 0.01125804 | 3.72619374 | 0.053126803 | 5.3479174e-149 | 7.402486e-220  | 0.020726747 |
| O55142 | Rpl35a   | 60S ribosomal protein L35a                            | 172.8   | 28.18 | 12554  | 5  | 0.01128631 | 0.79779313 | 0.053172281 | 1.5810863e-148 | 3.0794321e-219 | 0.020744489 |
| Q9JHU9 | Isyn1    | Inositol-3-phosphate synthase 1                       | 818.03  | 29.62 | 60932  | 14 | 0.01135643 | 1.69839714 | 0.053414527 | 4.6673326e-148 | 1.2783813e-218 | 0.020838999 |
| Q9CY94 | Gins3    | DNA replication complex GINS protein PSF3             | 56.5    | 7.41  | 24577  | 2  | 0.01137787 | 3.09364573 | 0.053427312 | 1.3757007e-147 | 5.2871956e-218 | 0.020843986 |
| Q6PGG2 | Gmip     | GEM-interacting protein                               | 94.61   | 1.03  | 107545 | 2  | 0.01142119 | 2.74148634 | 0.053455035 | 4.0487498e-147 | 2.1827801e-217 | 0.020854802 |
| P62331 | Arf6     | ADP-ribosylation factor 6                             | 340.18  | 30.29 | 20082  | 5  | 0.01142122 | 1.98198103 | 0.053455035 | 1.1897601e-146 | 8.9875195e-217 | 0.020854802 |
| P68254 | Ywhaq    | 14-3-3 protein theta                                  | 757.04  | 44.08 | 27778  | 12 | 0.01149333 | 3.86422706 | 0.053704503 | 3.4909134e-146 | 3.6970656e-216 | 0.020952129 |
| O89053 | Coro1a   | Coronin-1A                                            | 1683.42 | 52.93 | 50989  | 27 | 0.01153418 | 1.26428259 | 0.053807344 | 1.0227269e-145 | 1.5150724e-215 | 0.020992251 |
| B2RXC1 | Trappc11 | Trafficking protein particle complex subunit 11       | 47.95   | 0.79  | 128396 | 1  | 0.01158165 | 3.67539798 | 0.053940622 | 2.99172e-145   | 6.1930647e-215 | 0.021044248 |

|        |           |                                                                                   |         |       |        |    |            |            |             |                |                |             |
|--------|-----------|-----------------------------------------------------------------------------------|---------|-------|--------|----|------------|------------|-------------|----------------|----------------|-------------|
| Q91YQ5 | Rpn1      | Dolichyl-diphosphooligosaccharide--protein glycosyltransferase subunit 1          | 1542.48 | 52.96 | 68528  | 26 | 0.01164191 | 0.77430334 | 0.054132984 | 8.7382121e-145 | 2.5244438e-214 | 0.021119295 |
| Q3TC93 | Hs1bp3    | HCLS1-binding protein 3                                                           | 64.99   | 7.09  | 43691  | 2  | 0.0118285  | 4.3982344  | 0.054817744 | 2.5483807e-144 | 1.0256605e-213 | 0.021386446 |
| Q8C0M9 | Asrgl1    | Isoaspartyl peptidase/L-asparaginase                                              | 169.81  | 11.04 | 33950  | 3  | 0.01183379 | 2.24578458 | 0.054817744 | 7.420717e-144  | 4.1336899e-213 | 0.021386446 |
| P68510 | Ywhah     | 14-3-3 protein eta                                                                | 540.26  | 32.52 | 28212  | 10 | 0.01185252 | 4.24173441 | 0.054817744 | 2.1575802e-143 | 1.6640927e-212 | 0.021386446 |
| P36876 | Ppp2r2a   | Serine/threonine-protein phosphatase 2A 55 kDa regulatory subunit B alpha isoform | 410.72  | 18.79 | 51678  | 8  | 0.01187824 | 1.80279655 | 0.054817744 | 6.2636473e-143 | 6.6880803e-212 | 0.021386446 |
| P61924 | Copz1     | Coatomer subunit zeta-1                                                           | 104.24  | 22.03 | 20198  | 3  | 0.01188518 | 2.8487158  | 0.054817744 | 1.8156269e-142 | 2.6828462e-211 | 0.021386446 |
| Q60902 | Eps15l1   | Epidermal growth factor receptor substrate 15-like 1                              | 40.21   | 0.88  | 99309  | 1  | 0.01196475 | 7.58522997 | 0.055067625 | 5.2549018e-142 | 1.0748981e-210 | 0.021483934 |
| Q8VHI3 | Pofut2    | GDP-fucose protein O-fucosyltransferase 2                                         | 64.95   | 3.26  | 49429  | 1  | 0.01197793 | 81467.5223 | 0.055067625 | 1.5185917e-141 | 4.289789e-210  | 0.021483934 |
| Q9D7H3 | RtcA      | RNA 3'-terminal phosphate cyclase                                                 | 185.8   | 12.02 | 39254  | 3  | 0.01219012 | 2.12236153 | 0.05595304  | 4.38183e-141   | 1.7095505e-209 | 0.021829367 |
| P14152 | Mdh1      | Malate dehydrogenase, cytoplasmic                                                 | 504.53  | 44.61 | 36511  | 9  | 0.01223572 | 1.96131455 | 0.05607218  | 1.2624316e-140 | 6.7533919e-209 | 0.021875848 |
| Q3UDE2 | Till12    | Tubulin--tyrosine ligase-like protein 12                                          | 345.5   | 12.36 | 74043  | 7  | 0.01225825 | 1.69537235 | 0.056085418 | 3.6315979e-140 | 2.6609381e-208 | 0.021881012 |
| Q9JM76 | Arpc3     | Actin-related protein 2/3 complex subunit 3                                       | 372.7   | 44.38 | 20525  | 7  | 0.01232484 | 1.38658435 | 0.056224135 | 1.0430975e-139 | 1.0466143e-207 | 0.021935131 |
| O88569 | Hnrnpa2b1 | Heterogeneous nuclear ribonucleoproteins A2/B1                                    | 2156.49 | 66.86 | 37403  | 28 | 0.01232795 | 0.58024091 | 0.056224135 | 2.9914998e-139 | 4.1028654e-207 | 0.021935131 |
| Q61655 | Ddx19a    | ATP-dependent RNA helicase DDX19A                                                 | 562.17  | 30.54 | 53933  | 10 | 0.01236185 | 1.59606029 | 0.056233421 | 8.5662304e-139 | 1.6066954e-206 | 0.021938754 |
| P12382 | Pfkf      | ATP-dependent 6-phosphofructokinase, liver type                                   | 754.16  | 21.67 | 85360  | 13 | 0.01240803 | 1.67711805 | 0.056233421 | 2.4492149e-138 | 6.2783351e-206 | 0.021938754 |
| Q9EPB5 | Serhl     | Serine hydrolase-like protein                                                     | 45.97   | 2.89  | 35311  | 1  | 0.01241235 | 1.52568388 | 0.056233421 | 6.9919793e-138 | 2.4469833e-205 | 0.021938754 |
| P20650 | Ppm1a     | Protein phosphatase 1A                                                            | 62.49   | 3.14  | 42417  | 1  | 0.01242056 | 1.70081605 | 0.056233421 | 1.9930086e-137 | 9.5267296e-205 | 0.021938754 |
| Q9QXZ0 | Macf1     | Microtubule-actin cross-linking factor 1                                          | 609.27  | 2.18  | 831878 | 12 | 0.01242847 | 1.80689626 | 0.056233421 | 5.6722282e-137 | 3.7044361e-204 | 0.021938754 |
| P53811 | Pitpnb    | Phosphatidylinositol transfer protein beta isoform                                | 221.46  | 27.68 | 31487  | 6  | 0.01257108 | 1.96824696 | 0.056788657 | 1.6118827e-136 | 1.4386977e-203 | 0.022155372 |
| O08807 | Prdx4     | Peroxiredoxin-4                                                                   | 450.91  | 46.72 | 31053  | 10 | 0.01262152 | 3.79366089 | 0.05692646  | 4.5734935e-136 | 5.5541699e-203 | 0.022209135 |
| Q9WUB4 | Dctn6     | Dynalectin subunit 6                                                              | 40.93   | 9.47  | 20670  | 1  | 0.01264455 | 2.39060875 | 0.05694037  | 1.2956787e-135 | 2.1384266e-202 | 0.022214561 |
| Q922F4 | Tubb6     | Tubulin beta-6 chain                                                              | 1790.93 | 61.97 | 50090  | 29 | 0.01274971 | 1.72202415 | 0.057305865 | 3.6650582e-135 | 8.2189013e-202 | 0.022357154 |
| Q8R323 | Rfc3      | Replication factor C subunit 3                                                    | 205.16  | 11.24 | 40526  | 3  | 0.01276586 | 1.67081911 | 0.057305865 | 1.0351385e-134 | 3.1444253e-201 | 0.022357154 |
| Q8K1R7 | Nek9      | Serine/threonine-protein kinase Nek9                                              | 179.81  | 5.39  | 107143 | 4  | 0.01282458 | 2.26772634 | 0.057479063 | 2.9191051e-134 | 1.2012159e-200 | 0.022424725 |
| Q4QRB4 | Tubb3     | Tubulin beta-3 chain                                                              | 1717.98 | 38.89 | 50419  | 26 | 0.01288737 | 1.77290912 | 0.057669955 | 8.2192922e-134 | 4.5752824e-200 | 0.0224992   |
| Q9D8E6 | Rpl4      | 60S ribosomal protein L4                                                          | 1231.25 | 43.44 | 47154  | 19 | 0.01293427 | 0.79103727 | 0.057789274 | 2.3107461e-133 | 1.7373068e-199 | 0.02254575  |
| P62960 | Ybx1      | Nuclease-sensitive element-binding protein 1                                      | 954.34  | 49.07 | 35730  | 11 | 0.01295742 | 1.49139137 | 0.057802247 | 6.4863866e-133 | 6.5801647e-199 | 0.022550812 |
| O88447 | Klc1      | Kinesin light chain 1                                                             | 104.17  | 4.44  | 61450  | 2  | 0.01298295 | 2.19436592 | 0.057825768 | 1.8179668e-132 | 2.4880027e-198 | 0.022559988 |
| P61759 | Vbp1      | Prefoldin subunit 3                                                               | 245.47  | 32.14 | 22436  | 5  | 0.01306699 | 3.14104236 | 0.058010568 | 5.0874628e-132 | 9.3904037e-198 | 0.022632085 |
| Q9JIK9 | Mrps34    | 28S ribosomal protein S34, mitochondrial                                          | 151.62  | 13.76 | 25827  | 4  | 0.01307261 | 0.74933054 | 0.058010568 | 1.4215052e-131 | 3.530887e-197  | 0.022632085 |
| P47857 | Pfkf      | ATP-dependent 6-phosphofructokinase, muscle type                                  | 268.67  | 7.56  | 85269  | 6  | 0.01308863 | 1.67242374 | 0.058010568 | 3.9657672e-131 | 1.3261607e-196 | 0.022632085 |
| Q64152 | Btf3      | Transcription factor BTF3                                                         | 627.07  | 41.67 | 22031  | 9  | 0.01310571 | 1.50626455 | 0.058010568 | 1.104682e-130  | 4.9735849e-196 | 0.022632085 |
| O35130 | Emg1      | Ribosomal RNA small subunit methyltransferase NEP1                                | 311.22  | 40.16 | 26974  | 6  | 0.01316299 | 0.52782021 | 0.058173884 | 3.0724037e-130 | 1.8624662e-195 | 0.022695801 |
| Q9JLV6 | Pnkp      | Bifunctional polynucleotide phosphatase/kinase                                    | 384.78  | 21.65 | 57223  | 6  | 0.01333075 | 1.90586569 | 0.058771562 | 8.5319825e-130 | 6.95461e-195   | 0.022928978 |
| P84096 | Rhog      | Rho-related GTP-binding protein RhoG                                              | 599.43  | 58.12 | 21309  | 9  | 0.01333939 | 1.43441509 | 0.058771562 | 2.3656581e-129 | 2.5801828e-194 | 0.022928978 |
| B0LT89 | Stk24     | Serine/threonine-protein kinase 24                                                | 234.73  | 13.46 | 47990  | 5  | 0.01339046 | 1.80470072 | 0.058875805 | 6.5491362e-129 | 9.5609508e-194 | 0.022969646 |
| P29391 | Ftl1      | Ferritin light chain 1                                                            | 538.2   | 49.18 | 20802  | 9  | 0.01340982 | 1.56457006 | 0.058875805 | 1.8102801e-128 | 3.5336522e-193 | 0.022969646 |
| P32261 | Serpinc1  | Antithrombin-III                                                                  | 231.23  | 7.1   | 52004  | 4  | 0.01342492 | 1.62229342 | 0.058875805 | 4.9961671e-128 | 1.3039719e-192 | 0.022969646 |
| P01896 |           | H-2 class I histocompatibility antigen, alpha chain                               | 182.26  | 27.03 | 20454  | 4  | 0.01360889 | 1.66189179 | 0.059591089 | 1.3767568e-127 | 4.8050116e-192 | 0.023248705 |
| O35691 | Pnn       | Pinin                                                                             | 286.07  | 7.17  | 82436  | 6  | 0.01367147 | 0.65456988 | 0.059773444 | 3.7879676e-127 | 1.7585167e-191 | 0.023319849 |
| Q8VBV7 | Cops8     | COP9 signalosome complex subunit 8                                                | 216.54  | 29.67 | 23256  | 4  | 0.0137117  | 2.06696369 | 0.05983349  | 1.0405998e-126 | 6.4169778e-191 | 0.023343275 |
| Q9DB29 | Iah1      | Isoamyl acetate-hydrolyzing esterase 1 homolog                                    | 51.6    | 4.42  | 27974  | 1  | 0.01373101 | 2.4639688  | 0.05983349  | 2.8542327e-126 | 2.3364602e-190 | 0.023343275 |
| Q3V0K9 | Pls1      | Plastin-1                                                                         | 651.95  | 7.3   | 70408  | 11 | 0.01378457 | 2.38292608 | 0.05983349  | 7.8166889e-126 | 8.4941225e-190 | 0.023343275 |
| P61967 | Ap1s1     | AP-1 complex subunit sigma-1A                                                     | 35.15   | 4.43  | 18733  | 1  | 0.01378897 | 3.27431889 | 0.05983349  | 2.13739e-125   | 3.0799454e-189 | 0.023343275 |



|        |          |                                                                                  |         |       |        |    |            |            |             |                |                |             |
|--------|----------|----------------------------------------------------------------------------------|---------|-------|--------|----|------------|------------|-------------|----------------|----------------|-------------|
| P97311 | Mcm6     | DNA replication licensing factor MCM6                                            | 1179.58 | 31.06 | 92867  | 20 | 0.01379    | 1.12479118 | 0.05983349  | 5.8354171e-125 | 1.1155889e-188 | 0.023343275 |
| Q80X41 | Vrk1     | Serine/threonine-protein kinase VRK1                                             | 203.91  | 16.82 | 49741  | 4  | 0.01386292 | 1.69121135 | 0.05998358  | 1.5906949e-124 | 4.0368909e-188 | 0.023401831 |
| O70456 | Sfn      | 14-3-3 protein sigma                                                             | 158.96  | 12.1  | 27706  | 4  | 0.01386661 | 4.77773204 | 0.05998358  | 4.3294069e-124 | 1.456114e-187  | 0.023401831 |
| B0BNF1 | Sept8    | Septin-8                                                                         | 301.53  | 17.42 | 51252  | 6  | 0.01391366 | 2.72820171 | 0.06002254  | 1.1765114e-123 | 5.2467334e-187 | 0.023417031 |
| P80315 | Cct4     | T-complex protein 1 subunit delta                                                | 2112.64 | 60.67 | 58066  | 29 | 0.01391766 | 1.57542115 | 0.06002254  | 3.1921974e-123 | 1.8860039e-186 | 0.023417031 |
| P23249 | Mov10    | Putative helicase MOV-10                                                         | 135.6   | 4.88  | 113583 | 3  | 0.01394547 | 1.99387735 | 0.060051755 | 8.6478652e-123 | 6.7723066e-186 | 0.023428428 |
| Q9WV32 | Arpc1b   | Actin-related protein 2/3 complex subunit 1B                                     | 943.68  | 56.18 | 41064  | 16 | 0.01401055 | 1.35958458 | 0.060241161 | 2.3391243e-122 | 2.4274528e-185 | 0.023502323 |
| P97814 | Pstpip1  | Proline-serine-threonine phosphatase-interacting protein 1                       | 136.51  | 8.92  | 47590  | 2  | 0.01404523 | 3.13393141 | 0.060299465 | 6.3171706e-122 | 8.6753757e-185 | 0.023525069 |
| Q9WUA2 | Farsb    | Phenylalanine--tRNA ligase beta subunit                                          | 563.32  | 21.9  | 65697  | 12 | 0.01407065 | 1.63949902 | 0.060317883 | 1.7033994e-121 | 3.0942666e-184 | 0.023532255 |
| Q9JIK5 | Ddx21    | Nucleolar RNA helicase 2                                                         | 2381.58 | 52.53 | 93551  | 39 | 0.01418107 | 0.79888927 | 0.060700066 | 4.5860057e-121 | 1.1017499e-183 | 0.023681359 |
| Q922D8 | Mthfd1   | C-1-tetrahydrofolate synthase, cytoplasmic                                       | 1267.38 | 30.05 | 101200 | 25 | 0.01425468 | 1.60915838 | 0.060742153 | 1.2327546e-120 | 3.9061146e-183 | 0.023697779 |
| Q9Z2X2 | Psm10    | 26S proteasome non-ATPase regulatory subunit 10                                  | 82.89   | 3.46  | 25084  | 1  | 0.01427506 | 3.52656052 | 0.060742153 | 3.3085844e-120 | 1.3805031e-182 | 0.023697779 |
| Q6P7P5 | Bzw1     | Basic leucine zipper and W2 domain-containing protein 1                          | 165.36  | 12.65 | 48043  | 4  | 0.01429354 | 2.59191696 | 0.060742153 | 8.8660681e-120 | 4.8714534e-182 | 0.023697779 |
| P37996 | Arl3     | ADP-ribosylation factor-like protein 3                                           | 191.8   | 25.82 | 20457  | 4  | 0.01430676 | 2.30452968 | 0.060742153 | 2.3721537e-119 | 1.7164578e-181 | 0.023697779 |
| P62982 | Rps27a   | Ubiquitin-40S ribosomal protein S27a                                             | 730.07  | 58.97 | 17951  | 12 | 0.01431382 | 0.76184476 | 0.060742153 | 6.3369043e-119 | 6.0398935e-181 | 0.023697779 |
| Q921M7 | Fam49b   | Protein FAM49B                                                                   | 700.82  | 35.49 | 36776  | 11 | 0.01431855 | 1.75724807 | 0.060742153 | 1.690183e-118  | 2.1228842e-180 | 0.023697779 |
| P58404 | Strn4    | Striatin-4                                                                       | 56.34   | 2.24  | 81645  | 1  | 0.01439822 | 3.36688291 | 0.060920334 | 4.5010329e-118 | 7.4533842e-180 | 0.023767294 |
| Q8CG48 | Smc2     | Structural maintenance of chromosomes protein 2                                  | 717.19  | 15.03 | 134239 | 14 | 0.01440702 | 1.64848593 | 0.060920334 | 1.1967742e-117 | 2.6082196e-179 | 0.023767294 |
| P05063 | Aldoc    | Fructose-bisphosphate aldolase C                                                 | 1552.97 | 64.74 | 39395  | 24 | 0.01442457 | 1.67181785 | 0.060920334 | 3.1771189e-117 | 9.11618e-179   | 0.023767294 |
| P55770 | Snu13    | NHP2-like protein 1                                                              | 375.77  | 44.53 | 14174  | 7  | 0.01446369 | 0.74222834 | 0.060995326 | 8.4212315e-117 | 3.1816098e-178 | 0.023796551 |
| Q62087 | Pon3     | Serum paraoxonase/lactonase 3                                                    | 584.62  | 21.19 | 39351  | 8  | 0.01454023 | 1.61671407 | 0.06116052  | 2.2286316e-116 | 1.1080784e-177 | 0.023860999 |
| P84078 | Arfl     | ADP-ribosylation factor 1                                                        | 972.12  | 64.64 | 20697  | 14 | 0.01454571 | 1.61426357 | 0.06116052  | 5.8887232e-116 | 3.8468913e-177 | 0.023860999 |
| Q9D8U8 | Snx5     | Sorting nexin-5                                                                  | 737.63  | 47.77 | 46797  | 15 | 0.01457515 | 1.5952763  | 0.06119419  | 1.5535451e-115 | 1.3340431e-176 | 0.023874135 |
| P41542 | Uso1     | General vesicular transport factor p115                                          | 208.86  | 6.26  | 107162 | 5  | 0.01459747 | 5.60508157 | 0.061197904 | 4.0920986e-115 | 4.6179212e-176 | 0.023875584 |
| Q3T114 | Prrc1    | Protein PRRC1                                                                    | 65.9    | 2.93  | 46295  | 1  | 0.01471589 | 2.61174957 | 0.061553326 | 1.0761863e-114 | 1.5959902e-175 | 0.024014247 |
| Q99JW2 | Acy1     | Aminoacylase-1                                                                   | 645.02  | 33.09 | 45781  | 9  | 0.01472537 | 1.79324325 | 0.061553326 | 2.8258407e-114 | 5.4918287e-175 | 0.024014247 |
| Q6AYA1 | Gar1     | H/ACA ribonucleoprotein complex subunit 1                                        | 104.08  | 9.73  | 23011  | 2  | 0.01487469 | 0.50046505 | 0.062086614 | 7.4084326e-114 | 1.8874479e-174 | 0.024222303 |
| Q8K0C9 | Gmcs     | GDP-mannose 4,6 dehydratase                                                      | 127.7   | 6.72  | 41985  | 2  | 0.01497472 | 4.15792285 | 0.062382439 | 1.9392023e-113 | 6.4531333e-174 | 0.024337715 |
| Q5M7W1 | Txnip    | Thioredoxin-interacting protein                                                  | 38.62   | 3.05  | 44018  | 1  | 0.01498927 | 4.92195318 | 0.062382439 | 5.0680123e-113 | 2.1980054e-173 | 0.024337715 |
| B3GNI6 | Sept11   | Septin-11                                                                        | 380.63  | 20.88 | 49695  | 7  | 0.01503041 | 1.66858507 | 0.062431541 | 1.3224206e-112 | 7.4765449e-173 | 0.024356872 |
| Q8VBW6 | Nae1     | NEDD8-activating enzyme E1 regulatory subunit                                    | 117.42  | 4.68  | 60274  | 2  | 0.0150448  | 4.29605847 | 0.062431541 | 3.4452332e-112 | 2.5378316e-172 | 0.024356872 |
| Q9CR68 | Uqcrrf1  | Cytochrome b-c1 complex subunit Rieske, mitochondrial                            | 468.94  | 44.89 | 29368  | 7  | 0.01507219 | 0.39010988 | 0.062454439 | 8.9615751e-112 | 8.6028171e-172 | 0.024365805 |
| Q9ERS5 | Plekha2  | Pleckstrin homology domain-containing family A member 2                          | 91.66   | 5.65  | 47380  | 2  | 0.01513436 | 2.48156028 | 0.062604413 | 2.3273753e-111 | 2.9112301e-171 | 0.024424316 |
| Q9D2X5 | Mau2     | MAU2 chromatid cohesion factor homolog                                           | 46.81   | 1.13  | 69579  | 1  | 0.01515224 | 4.83628216 | 0.062604413 | 6.0348224e-111 | 9.8254164e-171 | 0.024424316 |
| P12265 | Gusb     | Beta-glucuronidase                                                               | 1068.84 | 36.27 | 74195  | 19 | 0.01538065 | 1.53805747 | 0.063456297 | 1.5623495e-110 | 3.3113121e-170 | 0.024756667 |
| Q9CR16 | Ppid     | Peptidyl-prolyl cis-trans isomerase D                                            | 365.23  | 17.3  | 40743  | 6  | 0.01543977 | 1.8817826  | 0.063575934 | 4.0383801e-110 | 1.1079332e-169 | 0.024803342 |
| Q9DCD0 | Pgd      | 6-phosphogluconate dehydrogenase, decarboxylating                                | 1873.08 | 56.52 | 53247  | 26 | 0.01545419 | 1.52022219 | 0.063575934 | 1.0422001e-109 | 3.6976183e-169 | 0.024803342 |
| Q4QQT4 | Ppp2r1b  | Serine/threonine-protein phosphatase 2A 65 kDa regulatory subunit A beta isoform | 570.71  | 14.98 | 66006  | 8  | 0.01550108 | 1.70825402 | 0.063677101 | 2.6854036e-109 | 1.2324071e-168 | 0.024842811 |
| Q9QZ88 | Vps29    | Vacuolar protein sorting-associated protein 29                                   | 200.28  | 37.36 | 20496  | 5  | 0.01554225 | 2.23149234 | 0.063754497 | 6.9084757e-109 | 4.098533e-168  | 0.024873006 |
| Q60865 | Caprin1  | Caprin-1                                                                         | 810.19  | 24.89 | 78169  | 14 | 0.01561813 | 1.84725197 | 0.063967055 | 1.7744703e-108 | 1.3602344e-167 | 0.024955933 |
| O35405 | Pld3     | Phospholipase D3                                                                 | 119.57  | 6.97  | 54389  | 2  | 0.01563888 | 1.44538782 | 0.063967055 | 4.5506005e-108 | 4.5009923e-167 | 0.024955933 |
| Q9EQ06 | Hsd17b11 | Estradiol 17-beta-dehydrogenase 11                                               | 108.06  | 11.74 | 32881  | 2  | 0.01566954 | 1.51610485 | 0.064000771 | 1.1651499e-107 | 1.4871508e-166 | 0.024969087 |
| Q3V1L4 | Nt5c2    | Cytosolic purine 5'-nucleotidase                                                 | 252.59  | 10.18 | 64809  | 5  | 0.01572653 | 2.27276323 | 0.064141787 | 2.9785687e-107 | 4.9050035e-166 | 0.025024103 |



|         |          |                                                                                     |          |       |        |    |            |            |             |                |                |             |
|---------|----------|-------------------------------------------------------------------------------------|----------|-------|--------|----|------------|------------|-------------|----------------|----------------|-------------|
| P10518  | Alad     | Delta-aminolevulinic acid dehydratase                                               | 433.91   | 32.12 | 36024  | 7  | 0.01575555 | 2.45162431 | 0.064168477 | 7.6023143e-107 | 1.6138339e-165 | 0.025034515 |
| Q80X50  | Ubap2l   | Ubiquitin-associated protein 2-like                                                 | 395.32   | 10.03 | 116799 | 6  | 0.01578892 | 1.87205897 | 0.064212756 | 1.9372962e-106 | 5.3007467e-165 | 0.02505179  |
| Q8BQM4  | Hear3    | HEAT repeat-containing protein 3                                                    | 196.51   | 7.22  | 74305  | 4  | 0.01583844 | 2.39157976 | 0.064322523 | 4.9289892e-106 | 1.7378998e-164 | 0.025094614 |
| Q9QYB1  | Clic4    | Chloride intracellular channel protein 4                                            | 921.84   | 57.31 | 28729  | 13 | 0.0158789  | 1.99627491 | 0.064390393 | 1.2520768e-105 | 5.6851067e-164 | 0.025121093 |
| Q9WVAA4 | Tagln2   | Transgelin-2                                                                        | 1756.11  | 79.4  | 22395  | 24 | 0.01591698 | 1.46577594 | 0.064390393 | 3.1755209e-105 | 1.8560242e-163 | 0.025121093 |
| P62869  | Elob     | Elongin-B                                                                           | 518.34   | 66.95 | 13170  | 10 | 0.01592281 | 2.12597761 | 0.064390393 | 8.0409897e-105 | 6.047671e-163  | 0.025121093 |
| P24369  | Ppib     | Peptidyl-prolyl cis-trans isomerase B                                               | 682.61   | 51.39 | 23713  | 13 | 0.01595769 | 1.60267003 | 0.064440196 | 2.0328914e-104 | 1.9684164e-162 | 0.025140523 |
| Q8K4Z3  | Naxe     | NAD(P)H-hydrate epimerase                                                           | 233.85   | 24.82 | 30973  | 4  | 0.01607626 | 1.7556786  | 0.064827306 | 5.1313144e-104 | 6.3950197e-162 | 0.025291549 |
| Q9D172  | Gatd3a   | Glutamine amidotransferase-like class 1 domain-containing protein 3A, mitochondrial | 59.06    | 9.4   | 28090  | 2  | 0.01623338 | 2.43630946 | 0.065243912 | 1.2931606e-103 | 2.0693179e-161 | 0.025454083 |
| P35979  | Rpl12    | 60S ribosomal protein L12                                                           | 472.11   | 49.7  | 17805  | 6  | 0.0162397  | 1.32336812 | 0.065243912 | 3.2537586e-103 | 6.6628367e-161 | 0.025454083 |
| O88712  | Ctbp1    | C-terminal-binding protein 1                                                        | 228.09   | 13.83 | 47745  | 5  | 0.01624813 | 1.52507257 | 0.065243912 | 8.1738531e-103 | 2.1429583e-160 | 0.025454083 |
| P05064  | Aldoa    | Fructose-bisphosphate aldolase A                                                    | 2479.37  | 82.69 | 39356  | 35 | 0.01629742 | 1.65156301 | 0.065349889 | 2.0501073e-102 | 6.8844106e-160 | 0.025495428 |
| P43277  | Hist1h1d | Histone H1.3                                                                        | 813.93   | 38.01 | 22100  | 13 | 0.01634447 | 0.59091289 | 0.065409423 | 5.1337442e-102 | 2.2068299e-159 | 0.025518655 |
| P16446  | Pitpna   | Phosphatidylinositol transfer protein alpha isoform                                 | 271.48   | 28.78 | 31907  | 5  | 0.01635808 | 1.86273373 | 0.065409423 | 1.2835103e-101 | 7.0590516e-159 | 0.025518655 |
| Q6PDY2  | Ado      | 2-aminoethanethiol dioxygenase                                                      | 132.57   | 16.8  | 28372  | 4  | 0.01639533 | 1.7175571  | 0.065466654 | 3.2038459e-101 | 2.2550987e-158 | 0.025540982 |
| Q9CWU9  | Nup37    | Nucleoporin Nup37                                                                   | 133.98   | 10.12 | 36732  | 2  | 0.01648098 | 0.42865755 | 0.065716758 | 7.984553e-101  | 7.1906597e-158 | 0.025638557 |
| P23492  | Pnp      | Purine nucleoside phosphorylase                                                     | 615.23   | 31.83 | 32277  | 10 | 0.0166133  | 2.19203921 | 0.066016445 | 1.9867167e-100 | 2.2857724e-157 | 0.025755477 |
| P56812  | Pdcd5    | Programmed cell death protein 5                                                     | 259.72   | 45.24 | 14275  | 5  | 0.01663315 | 1.76776734 | 0.066016445 | 4.9354553e-100 | 7.2354267e-157 | 0.025755477 |
| P62305  | Snrpe    | Small nuclear ribonucleoprotein E                                                   | 296.15   | 69.57 | 10804  | 6  | 0.01667005 | 0.5738766  | 0.066016445 | 1.2241202e-99  | 2.2870434e-156 | 0.025755477 |
| Q922Q8  | Lrrc59   | Leucine-rich repeat-containing protein 59                                           | 315.59   | 36.81 | 34877  | 7  | 0.01667011 | 1.78825333 | 0.066016445 | 3.0312804e-99  | 7.2157535e-156 | 0.025755477 |
| Q68FL4  | Ahcy12   | Putative adenosylhomocysteinase 3                                                   | 238.46   | 7.01  | 66899  | 5  | 0.01670437 | 2.65994044 | 0.066016445 | 7.4943323e-99  | 2.2744614e-155 | 0.025755477 |
| Q99M31  | Hspa14   | Heat shock 70 kDa protein 14                                                        | 198.91   | 10.81 | 54650  | 4  | 0.01671701 | 2.00172747 | 0.066016445 | 1.8498826e-98  | 7.1565005e-155 | 0.025755477 |
| Q9DAW6  | Prpf4    | U4/U6 small nuclear ribonucleoprotein Prp4                                          | 181.96   | 9.98  | 58370  | 4  | 0.01673481 | 0.47987898 | 0.066016445 | 4.5588931e-98  | 2.2489385e-154 | 0.025755477 |
| Q9EQ80  | Nif311   | NIF3-like protein 1                                                                 | 368.02   | 19.95 | 41746  | 7  | 0.01674472 | 1.89863458 | 0.066016445 | 1.121704e-97   | 7.0575508e-154 | 0.025755477 |
| Q9Z0S1  | Bpnt1    | 3'(2'),5'-bisphosphate nucleotidase 1                                               | 407.94   | 30.19 | 33196  | 7  | 0.01681864 | 2.21436274 | 0.066016445 | 2.7554994e-97  | 2.2121414e-153 | 0.025755477 |
| Q62418  | Dbn1     | Drebrin-like protein                                                                | 700.57   | 32.34 | 48700  | 10 | 0.01682224 | 1.37300291 | 0.066016445 | 6.7581094e-97  | 6.9148097e-153 | 0.025755477 |
| Q5FWK3  | Arhgap1  | Rho GTPase-activating protein 1                                                     | 140.86   | 7.06  | 50411  | 2  | 0.01685281 | 11.1369596 | 0.066016445 | 1.6548267e-96  | 2.1592173e-152 | 0.025755477 |
| Q91YE6  | Ipo9     | Impartin-9                                                                          | 336.01   | 8.84  | 116052 | 7  | 0.01685411 | 1.82242043 | 0.066016445 | 4.04559e-96    | 6.7309752e-152 | 0.025755477 |
| Q6PDI5  | Ecpas    | Proteasome adapter and scaffold protein ECM29                                       | 95.38    | 0.98  | 203703 | 2  | 0.01685674 | 2.61295134 | 0.066016445 | 9.8744481e-96  | 2.0961917e-151 | 0.025755477 |
| P53563  | Bcl2l1   | Bcl-2-like protein 1                                                                | 131.51   | 14.16 | 26158  | 2  | 0.01703365 | 1.41257646 | 0.06661791  | 2.4062737e-95  | 6.5213934e-151 | 0.02599013  |
| Q8BLN5  | Lss      | Lanosterol synthase                                                                 | 50.39    | 1.64  | 83141  | 1  | 0.01711236 | 2.59881896 | 0.066834193 | 5.8543413e-95  | 2.0183586e-150 | 0.02607451  |
| P11983  | Tcp1     | T-complex protein 1 subunit alpha                                                   | 2145.54  | 64.57 | 60449  | 31 | 0.01716887 | 1.5139812  | 0.066963294 | 1.4220389e-94  | 6.2292002e-150 | 0.026124878 |
| O08618  | Prpsap2  | Phosphoribosyl pyrophosphate synthase-associated protein 2                          | 179.36   | 11.92 | 40867  | 3  | 0.01744194 | 1.76333784 | 0.067898239 | 3.4486166e-94  | 1.9181116e-149 | 0.026489634 |
| Q91WU5  | As3mt    | Arsenite methyltransferase                                                          | 146.66   | 13.3  | 41794  | 3  | 0.01745615 | 2.60141817 | 0.067898239 | 8.3498365e-94  | 5.8632324e-149 | 0.026489634 |
| Q01730  | Rsu1     | Ras suppressor protein 1                                                            | 148.7    | 24.19 | 31550  | 3  | 0.01753895 | 2.17210426 | 0.068080777 | 2.0184139e-93  | 1.7899786e-148 | 0.026560849 |
| E9Q555  | Rnf213   | E3 ubiquitin-protein ligase RNF213                                                  | 48.5     | 0.14  | 584784 | 1  | 0.01755077 | 4.69285041 | 0.068080777 | 4.8712596e-93  | 5.4490461e-148 | 0.026560849 |
| P15864  | Hist1h1c | Histone H1.2                                                                        | 908.99   | 43.4  | 21267  | 14 | 0.01757661 | 0.59979847 | 0.068088504 | 1.1737368e-92  | 1.656781e-147  | 0.026563864 |
| Q27W01  | Rbm8a    | RNA-binding protein 8A                                                              | 251.44   | 32.18 | 19889  | 4  | 0.01764841 | 0.57499464 | 0.068261595 | 2.8235672e-92  | 5.0296972e-147 | 0.026631393 |
| Q61703  | Itih2    | Inter-alpha-trypsin inhibitor heavy chain H2                                        | 136.59   | 4.44  | 105928 | 3  | 0.01766911 | 2.39201642 | 0.068261595 | 6.7814582e-92  | 1.5229868e-146 | 0.026631393 |
| Q9CRC8  | Lrrc40   | Leucine-rich repeat-containing protein 40                                           | 133.78   | 4.32  | 68076  | 2  | 0.017739   | 2.08485868 | 0.068359368 | 1.6260923e-91  | 4.6050549e-146 | 0.026669538 |
| P26041  | Msn      | Moesin                                                                              | 3455.891 | 67.94 | 67767  | 55 | 0.01774231 | 1.50229486 | 0.068359368 | 3.8928176e-91  | 1.3889112e-145 | 0.026669538 |
| Q9QYI3  | Dnajc7   | DnaJ homolog subfamily C member 7                                                   | 224.76   | 8.1   | 56476  | 3  | 0.01779663 | 1.90192445 | 0.068394196 | 9.3042039e-91  | 4.1847524e-145 | 0.026683126 |
| Q8BP48  | Metap1   | Methionine aminopeptidase 1                                                         | 273.95   | 24.35 | 43221  | 6  | 0.01784897 | 1.93055878 | 0.068394196 | 2.2201907e-90  | 1.2581176e-144 | 0.026683126 |
| Q922K7  | Nop2     | Probable 28S rRNA (cytosine-C(5))-methyltransferase                                 | 857.22   | 24.84 | 86752  | 15 | 0.01785066 | 0.67193534 | 0.068394196 | 5.2892834e-90  | 3.77442e-144   | 0.026683126 |
| P26817  | Grk2     | Beta-adrenergic receptor kinase 1                                                   | 417.71   | 14.22 | 79785  | 9  | 0.01786779 | 1.54137887 | 0.068394196 | 1.2580516e-89  | 1.1312264e-143 | 0.026683126 |
| P51863  | Atp6v0d1 | V-type proton ATPase subunit d 1                                                    | 399.27   | 25.36 | 40301  | 8  | 0.01787113 | 1.91353315 | 0.068394196 | 2.9874091e-89  | 3.3858556e-143 | 0.026683126 |

|        |         |                                                                |         |       |        |    |            |            |             |               |                |             |
|--------|---------|----------------------------------------------------------------|---------|-------|--------|----|------------|------------|-------------|---------------|----------------|-------------|
| Q9JHR7 | Ide     | Insulin-degrading enzyme                                       | 208.6   | 6.18  | 117772 | 5  | 0.0180603  | 2.96599508 | 0.068873603 | 7.082477e-89  | 1.0123714e-142 | 0.02687016  |
| P53564 | Cux1    | Homeobox protein cut-like 1                                    | 56.26   | 0.59  | 165596 | 1  | 0.01806286 | 5.14078699 | 0.068873603 | 1.6763683e-88 | 3.0114539e-142 | 0.02687016  |
| Q6PEC4 | Skp1    | S-phase kinase-associated protein 1                            | 199.83  | 20.86 | 18672  | 2  | 0.01806877 | 0.57972029 | 0.068873603 | 3.9613853e-88 | 8.9489991e-142 | 0.02687016  |
| P27659 | Rpl3    | 60S ribosomal protein L3                                       | 1300.46 | 45.16 | 46110  | 20 | 0.01813519 | 0.83956253 | 0.069003858 | 9.3458255e-88 | 2.6564491e-141 | 0.026920978 |
| Q91VD9 | Ndufs1  | NADH-ubiquinone oxidoreductase 75 kDa subunit, mitochondrial   | 703.16  | 25.45 | 79777  | 15 | 0.01820928 | 0.8092941  | 0.069003858 | 2.2013078e-87 | 7.8664873e-141 | 0.026920978 |
| P62774 | Mtpn    | Myotrophin                                                     | 239.8   | 35.59 | 12861  | 3  | 0.01822485 | 2.01811078 | 0.069003858 | 5.176497e-87  | 2.3235025e-140 | 0.026920978 |
| P54276 | Msh6    | DNA mismatch repair protein Msh6                               | 104.05  | 2.5   | 151084 | 2  | 0.01822682 | 2.51407661 | 0.069003858 | 1.2152981e-86 | 6.8539852e-140 | 0.026920978 |
| Q8BG07 | Pld4    | Phospholipase D4                                               | 797.23  | 31.41 | 56154  | 12 | 0.01824432 | 1.59742702 | 0.069003858 | 2.8485307e-86 | 2.0198e-139    | 0.026920978 |
| Q64105 | Spr     | Sepiapterin reductase                                          | 763.56  | 59.39 | 27883  | 12 | 0.01825109 | 1.68781506 | 0.069003858 | 6.6657618e-86 | 5.9441747e-139 | 0.026920978 |
| Q91YJ3 | Thyn1   | Thymocyte nuclear protein 1                                    | 78.47   | 6.64  | 26178  | 2  | 0.01829602 | 2.22878817 | 0.069003858 | 1.5572884e-85 | 1.7474027e-138 | 0.026920978 |
| P24063 | Itgal   | Integrin alpha-L                                               | 61.08   | 0.95  | 128328 | 1  | 0.01829629 | 0.57845494 | 0.069003858 | 3.6322707e-85 | 5.1268956e-138 | 0.026920978 |
| Q9D771 | Tmem206 | Transmembrane protein 206                                      | 155.94  | 21.14 | 40178  | 4  | 0.01838677 | 1.7684349  | 0.069253601 | 8.4581791e-85 | 1.5027747e-137 | 0.027018412 |
| P28474 | Adh5    | Alcohol dehydrogenase class-3                                  | 971.23  | 54.01 | 39548  | 14 | 0.01856007 | 1.82553948 | 0.069748128 | 1.9663671e-84 | 4.3920793e-137 | 0.027211345 |
| Q3TDN2 | Faf2    | FAS-associated factor 2                                        | 64.36   | 2.7   | 52471  | 1  | 0.01856693 | 1.92676694 | 0.069748128 | 4.5639506e-84 | 1.2776916e-136 | 0.027211345 |
| Q3UM45 | Ppp1r7  | Protein phosphatase 1 regulatory subunit 7                     | 1027.28 | 55.12 | 41292  | 17 | 0.01864154 | 2.246219   | 0.069812974 | 1.0575611e-83 | 3.7127956e-136 | 0.027236644 |
| P06801 | Me1     | NADP-dependent malic enzyme                                    | 94.39   | 3.15  | 63954  | 1  | 0.01864854 | 2.83383716 | 0.069812974 | 2.4465703e-83 | 1.0761538e-135 | 0.027236644 |
| Q99N27 | Snx1    | Sorting nexin-1                                                | 517.91  | 18.39 | 59044  | 9  | 0.01865755 | 1.88332886 | 0.069812974 | 5.6506348e-83 | 3.1157685e-135 | 0.027236644 |
| Q9WTM5 | Ruvbl2  | RuvB-like 2                                                    | 874.24  | 33.26 | 51113  | 15 | 0.01870116 | 1.19455657 | 0.069884564 | 1.3029376e-82 | 9.0106119e-135 | 0.027264574 |
| P61078 | Ube2d3  | Ubiquitin-conjugating enzyme E2 D3                             | 189.62  | 36.05 | 16687  | 3  | 0.01874309 | 2.21073455 | 0.069949701 | 2.999414e-82  | 2.600917e-134  | 0.027289986 |
| Q920B9 | Supt16h | FACT complex subunit SPT16                                     | 687.13  | 16.62 | 119825 | 13 | 0.01880479 | 1.19954467 | 0.070018293 | 6.8934267e-82 | 7.4937297e-134 | 0.027316746 |
| Q9CRB2 | Nhp2    | H/ACA ribonucleoprotein complex subunit 2                      | 198.85  | 23.53 | 17247  | 3  | 0.01881052 | 0.28320519 | 0.070018293 | 1.5816829e-81 | 2.1542276e-133 | 0.027316746 |
| P70582 | Nup54   | Nuclear pore complex protein Nup54                             | 136.49  | 4.51  | 55745  | 2  | 0.01884624 | 0.59811643 | 0.07005993  | 3.6231701e-81 | 6.1860337e-133 | 0.027332991 |
| P62196 | Psmc5   | 26S proteasome regulatory subunit 8                            | 759.97  | 40.39 | 45626  | 13 | 0.01892546 | 1.19654694 | 0.070262913 | 8.2859565e-81 | 1.7733314e-132 | 0.027412182 |
| Q64514 | Tip2    | Tripeptidyl-peptidase 2                                        | 987.35  | 24.25 | 139879 | 19 | 0.0190834  | 1.7309961  | 0.070714645 | 1.891824e-80  | 5.0703345e-132 | 0.027588419 |
| Q9Z2Y8 | Plpbp   | Pyridoxal phosphate homeostasis protein                        | 82.71   | 4.74  | 30049  | 1  | 0.01910448 | 3.34310623 | 0.070714645 | 4.3122358e-80 | 1.4436414e-131 | 0.027588419 |
| Q8CHP8 | Pgp     | Glycerol-3-phosphate phosphatase                               | 436.34  | 35.2  | 34541  | 8  | 0.01912144 | 2.04701376 | 0.070714645 | 9.8131294e-80 | 4.1046425e-131 | 0.027588419 |
| Q6A0A9 | FAM120A | Constitutive coactivator of PPAR-gamma-like protein 1          | 371.15  | 9.71  | 121646 | 8  | 0.01917921 | 1.41516103 | 0.070836555 | 2.2294377e-79 | 1.1655221e-130 | 0.027635981 |
| Q91VX2 | Ubap2   | Ubiquitin-associated protein 2                                 | 204.92  | 5.57  | 117966 | 4  | 0.01922225 | 2.52669895 | 0.070903767 | 5.0566802e-79 | 3.3024499e-130 | 0.027662203 |
| Q9Z0Y1 | Dctn3   | Dynactin subunit 3                                             | 38      | 4.3   | 20978  | 1  | 0.01930805 | 2.44029941 | 0.071128351 | 1.1450317e-78 | 9.3401357e-130 | 0.027749822 |
| Q78JE5 | Fbxo22  | F-box only protein 22                                          | 41.06   | 2.24  | 44203  | 1  | 0.01935863 | 2.27460151 | 0.071209249 | 2.5885166e-78 | 2.6345131e-129 | 0.027781383 |
| Q6PAR5 | Gapvd1  | GTPase-activating protein and VPS9 domain-containing protein 1 | 154.87  | 3.02  | 162402 | 3  | 0.01937989 | 3.31629416 | 0.071209249 | 5.842051e-78  | 7.4162926e-129 | 0.027781383 |
| Q9CXF4 | Tbc1d15 | TBC1 domain family member 15                                   | 169.02  | 4.02  | 76527  | 3  | 0.01947431 | 2.28034622 | 0.071464198 | 1.3163162e-77 | 2.0848123e-128 | 0.027880848 |
| Q9Z1F9 | Uba2    | SUMO-activating enzyme subunit 2                               | 895.4   | 44.83 | 70569  | 16 | 0.0196474  | 1.80132431 | 0.071916473 | 2.9609776e-77 | 5.8440137e-128 | 0.028057297 |
| Q9D855 | Uqcrb   | Cytochrome b-c1 complex subunit 7                              | 38.76   | 9.01  | 13527  | 1  | 0.01964793 | 3.20467027 | 0.071916473 | 6.6495093e-77 | 1.631004e-127  | 0.028057297 |
| Q8R404 | Mic13   | MICOS complex subunit MIC13                                    | 72.83   | 33.61 | 13373  | 2  | 0.01978335 | 1.9633823  | 0.072270185 | 1.4908129e-76 | 4.5475086e-127 | 0.028195294 |
| Q7TNG5 | Eml2    | Echinoderm microtubule-associated protein-like 2               | 152.47  | 9.4   | 70734  | 3  | 0.0197952  | 2.16611198 | 0.072270185 | 3.3368397e-76 | 1.2633558e-126 | 0.028195294 |
| P70699 | Gaa     | Lysosomal alpha-glucosidase                                    | 769.46  | 20.25 | 106248 | 12 | 0.01982544 | 1.49557536 | 0.072288155 | 7.4563396e-76 | 3.5055612e-126 | 0.028202304 |
| P70677 | Casp3   | Caspase-3                                                      | 354.9   | 25.63 | 31475  | 6  | 0.019862   | 1.72863752 | 0.072327975 | 1.6633885e-75 | 9.7121203e-126 | 0.02821784  |
| Q6P069 | Sri     | Sorcini                                                        | 114.87  | 11.62 | 21627  | 2  | 0.01990951 | 2.53468565 | 0.072327975 | 3.7045796e-75 | 2.6862249e-125 | 0.02821784  |
| P03995 | Gfap    | Glial fibrillary acidic protein                                | 164.37  | 6.05  | 49900  | 3  | 0.01991236 | 3.11645348 | 0.072327975 | 8.2368452e-75 | 7.4156913e-125 | 0.02821784  |
| P84091 | Ap2m1   | AP-2 complex subunit mu                                        | 534.71  | 31.26 | 49655  | 12 | 0.01998741 | 1.65306408 | 0.072508327 | 1.8283492e-74 | 2.0450979e-124 | 0.028288202 |
| Q8CDG3 | Vcpip1  | Deubiquitinating protein VCIP135                               | 100.37  | 2.54  | 134503 | 3  | 0.02001604 | 2.29048267 | 0.072520039 | 4.0516615e-74 | 5.626389e-124  | 0.028292771 |
| Q5XIG8 | Strap   | Serine-threonine kinase receptor-associated protein            | 524.02  | 46.57 | 38456  | 8  | 0.02005119 | 2.11047004 | 0.072555315 | 8.9636001e-74 | 1.545556e-123  | 0.028306533 |
| P11240 | Cox5a   | Cytochrome c oxidase subunit 5A, mitochondrial                 | 231.57  | 16.44 | 16130  | 4  | 0.02017298 | 1.41123881 | 0.072903622 | 1.979733e-73  | 4.2386284e-123 | 0.028442421 |
| P49718 | Mcm5    | DNA replication licensing factor MCM5                          | 1088.75 | 30.97 | 82343  | 22 | 0.02021719 | 1.35439576 | 0.072971033 | 4.3652097e-73 | 1.1586221e-122 | 0.028468721 |
| P51807 | Dynl1   | Dynein light chain Tctex-type 1                                | 61.35   | 15.93 | 12483  | 1  | 0.0203321  | 7.64231856 | 0.073216971 | 9.608984e-73  | 3.1613557e-122 | 0.02856467  |

|        |           |                                                                             |         |       |        |    |            |            |             |               |                |             |
|--------|-----------|-----------------------------------------------------------------------------|---------|-------|--------|----|------------|------------|-------------|---------------|----------------|-------------|
| Q9QZQ8 | H2afy     | Core histone macro-H2A.1                                                    | 453.21  | 32.53 | 39735  | 7  | 0.02033662 | 0.63916085 | 0.073216971 | 2.1116562e-72 | 8.5989936e-122 | 0.02856467  |
| P08030 | Aprt      | Adenine phosphoribosyltransferase                                           | 923.16  | 78.89 | 19724  | 14 | 0.02040937 | 1.85381064 | 0.07338633  | 4.6327817e-72 | 2.3364776e-121 | 0.028630743 |
| Q60749 | Khdrbs1   | KH domain-containing, RNA-binding, signal transduction-associated protein 1 | 141.85  | 16.48 | 48371  | 4  | 0.02063174 | 0.6938005  | 0.074092604 | 1.0146888e-71 | 6.3338025e-121 | 0.028906287 |
| Q9CQX2 | Cyb5b     | Cytochrome b5 type B                                                        | 95.89   | 15.75 | 16318  | 2  | 0.02075421 | 0.47104351 | 0.074420771 | 2.2186859e-71 | 1.7083044e-120 | 0.029034318 |
| P54726 | Rad23a    | UV excision repair protein RAD23 homolog A                                  | 282.73  | 20.66 | 39706  | 4  | 0.02078726 | 2.10686412 | 0.074420771 | 4.8431755e-71 | 4.5927677e-120 | 0.029034318 |
| B0BN72 | Mcrip1    | Mapk-regulated corepressor-interacting protein 1                            | 49.34   | 11.34 | 11101  | 1  | 0.02080132 | 2.98865037 | 0.074420771 | 1.0554448e-70 | 1.2328281e-119 | 0.029034318 |
| Q9D051 | Pdhb      | Pyruvate dehydrogenase E1 component subunit beta, mitochondrial             | 542.36  | 25.07 | 38937  | 8  | 0.0208454  | 1.22011726 | 0.074485117 | 2.2962084e-70 | 3.3052067e-119 | 0.029059421 |
| Q99MD9 | Nasp      | Nuclear autoantigenic sperm protein                                         | 531.58  | 14.88 | 83954  | 7  | 0.02105134 | 1.63055917 | 0.075068346 | 4.9872026e-70 | 8.8455893e-119 | 0.02928696  |
| Q9CWK3 | Cd2bp2    | CD2 antigen cytoplasmic tail-binding protein 2                              | 89.39   | 7.02  | 37694  | 2  | 0.02106895 | 0.71399831 | 0.075068346 | 1.0813647e-69 | 2.35629e-118   | 0.02928696  |
| Q3TCN2 | Pldb2     | Putative phospholipase B-like 2                                             | 104.71  | 4.55  | 66289  | 2  | 0.0210875  | 2.15194453 | 0.075068346 | 2.3407569e-69 | 6.2686524e-118 | 0.02928696  |
| Q9JKB1 | Uchl3     | Ubiquitin carboxyl-terminal hydrolase isozyme L3                            | 170.06  | 15.65 | 26152  | 3  | 0.02115805 | 1.99235708 | 0.075225691 | 5.0583503e-69 | 1.6655409e-117 | 0.029348347 |
| Q8R050 | Gspt1     | Eukaryotic peptide chain release factor GTP-binding subunit ERF3A           | 416.34  | 21.7  | 68625  | 9  | 0.02168708 | 1.36202467 | 0.077002986 | 1.0912631e-68 | 4.415415e-117  | 0.030041736 |
| Q3UMB9 | Washc4    | WASH complex subunit 4                                                      | 106.43  | 1.11  | 136370 | 2  | 0.02172397 | 3.52350083 | 0.077002986 | 2.3502684e-68 | 1.1586606e-116 | 0.030041736 |
| Q4KLF8 | Arpc5     | Actin-related protein 2/3 complex subunit 5                                 | 252.9   | 16.56 | 16320  | 3  | 0.02174808 | 1.34287018 | 0.077002986 | 5.0532691e-68 | 3.0356481e-116 | 0.030041736 |
| Q9DCL9 | Paics     | Multifunctional protein ADE2                                                | 593.84  | 32.71 | 47006  | 12 | 0.0217679  | 1.61987506 | 0.077002986 | 1.0846605e-67 | 7.9424126e-116 | 0.030041736 |
| Q6P8X1 | Snx6      | Sorting nexin-6                                                             | 187.77  | 15.02 | 46649  | 4  | 0.02179279 | 2.64103636 | 0.077002986 | 2.3242412e-67 | 2.0753478e-115 | 0.030041736 |
| P70202 | Lxn       | Latexin                                                                     | 127.05  | 9.46  | 25492  | 2  | 0.02184047 | 1.99527551 | 0.07707607  | 4.972033e-67  | 5.4153751e-115 | 0.030070248 |
| P01900 | H2-D1     | H-2 class I histocompatibility antigen, D-D alpha chain                     | 494.02  | 31.23 | 41110  | 10 | 0.02204534 | 1.29223611 | 0.077610214 | 1.061822e-66  | 1.4105763e-114 | 0.030278638 |
| Q9R0Q9 | Mpdu1     | Mannose-P-dolichol utilization defect 1 protein                             | 113.79  | 10.12 | 26498  | 2  | 0.02204619 | 2.17943983 | 0.077610214 | 2.2637782e-66 | 3.6579861e-114 | 0.030278638 |
| P26450 | Pik3r1    | Phosphatidylinositol 3-kinase regulatory subunit alpha                      | 48.96   | 1.66  | 83517  | 1  | 0.02208042 | 2.43028405 | 0.077634984 | 4.8181458e-66 | 9.4769019e-114 | 0.030288302 |
| Q64522 | Hist2h2ab | Histone H2A type 2-B                                                        | 594.15  | 57.69 | 14013  | 7  | 0.02214729 | 0.15431597 | 0.077774294 | 1.0237393e-65 | 2.4514617e-113 | 0.030342652 |
| Q62348 | Tsn       | Translin                                                                    | 380.23  | 31.14 | 26201  | 7  | 0.0222828  | 1.71803743 | 0.078154054 | 2.1715094e-65 | 6.3282173e-113 | 0.03049081  |
| Q8R5A6 | Tbc1d22a  | TBC1 domain family member 22A                                               | 40.01   | 1.55  | 59362  | 1  | 0.02233927 | 3.29630895 | 0.078255982 | 4.5982906e-65 | 1.6283283e-112 | 0.030530576 |
| O54940 | Bnip2     | BCL2/adenovirus E1B 19 kDa protein-interacting protein 2                    | 69.71   | 7.67  | 37769  | 2  | 0.02238415 | 1.91530514 | 0.07831708  | 9.7205972e-65 | 4.181973e-112  | 0.030554413 |
| P70290 | Mpp1      | 55 kDa erythrocyte membrane protein                                         | 264.75  | 13.73 | 52227  | 5  | 0.02243023 | 1.86847418 | 0.078382259 | 2.0514022e-64 | 1.0722187e-111 | 0.030579842 |
| P47226 | Tes       | Testin                                                                      | 271.22  | 15.13 | 47983  | 5  | 0.02250303 | 1.59449903 | 0.078540529 | 4.3218479e-64 | 2.7443558e-111 | 0.030641589 |
| O54950 | Prkg1     | 5'-AMP-activated protein kinase subunit gamma-1                             | 155.82  | 13.33 | 37520  | 3  | 0.02267605 | 2.02648124 | 0.079028904 | 9.0896766e-64 | 7.0091151e-111 | 0.030832122 |
| P18654 | Rps6ka3   | Ribosomal protein S6 kinase alpha-3                                         | 78.01   | 2.57  | 83694  | 2  | 0.02269832 | 2.04322164 | 0.079028904 | 1.9084779e-63 | 1.7833941e-110 | 0.030832122 |
| P13084 | Npm1      | Nucleophosmin                                                               | 1367.38 | 54.45 | 32560  | 20 | 0.02272755 | 0.70893111 | 0.079034309 | 4.0002311e-63 | 4.5316895e-110 | 0.030834231 |
| Q63623 | Scaf8     | Protein SCAF8                                                               | 74.72   | 0.95  | 139504 | 1  | 0.02278359 | 1.99302656 | 0.079132775 | 8.3703137e-63 | 1.1498797e-109 | 0.030872646 |
| O09044 | Snap23    | Synaptosomal-associated protein 23                                          | 61.12   | 6.67  | 23261  | 1  | 0.02286721 | 1.91126916 | 0.07918377  | 1.7484635e-62 | 2.9123044e-109 | 0.030892541 |
| Q4FZY0 | Efh2      | EF-hand domain-containing protein D2                                        | 1133.68 | 59    | 26759  | 18 | 0.02286848 | 1.60812696 | 0.07918377  | 3.6461039e-62 | 7.3590661e-109 | 0.030892541 |
| Q9JLI8 | Sart3     | Squamous cell carcinoma antigen recognized by T-cells 3                     | 366.2   | 9.88  | 109619 | 7  | 0.02288147 | 1.81526031 | 0.07918377  | 7.5902944e-62 | 1.8577334e-108 | 0.030892541 |
| Q03265 | Atp5f1a   | ATP synthase subunit alpha, mitochondrial                                   | 2770.93 | 62.39 | 59753  | 40 | 0.023085   | 0.79802334 | 0.079791373 | 1.5774107e-61 | 4.6842114e-108 | 0.031129589 |
| Q8CI33 | Cwf1911   | CWF19-like protein 1                                                        | 80.37   | 5.4   | 60193  | 2  | 0.02319798 | 2.53810028 | 0.080084912 | 3.2725555e-61 | 1.1761693e-107 | 0.03124411  |
| P28867 | Prked     | Protein kinase C delta type                                                 | 295.61  | 10.53 | 77547  | 6  | 0.02323535 | 1.7558747  | 0.080117048 | 6.7777375e-61 | 2.9452032e-107 | 0.031256647 |
| O89110 | Casp8     | Caspase-8                                                                   | 116.36  | 4.38  | 55357  | 2  | 0.02348823 | 3.24856085 | 0.080891305 | 1.4013204e-60 | 7.3636115e-107 | 0.031558714 |
| P31786 | Dbi       | Acyl-CoA-binding protein                                                    | 83.72   | 32.18 | 10000  | 2  | 0.0236376  | 1.67326236 | 0.081307649 | 2.8923083e-60 | 1.8320763e-106 | 0.031721145 |
| Q7TQH0 | Atxn2l    | Ataxin-2-like protein                                                       | 476.95  | 12.2  | 110649 | 9  | 0.02367249 | 1.68172305 | 0.081329676 | 5.9594422e-60 | 4.5434384e-106 | 0.031729739 |
| Q8R127 | Scepdh    | Saccharopine dehydrogenase-like oxidoreductase                              | 189.76  | 13.75 | 47129  | 4  | 0.02376021 | 1.88335971 | 0.081532945 | 1.2258011e-59 | 1.1250753e-105 | 0.031809042 |
| Q0P5W1 | Vps8      | Vacuolar protein sorting-associated protein 8 homolog                       | 37.15   | 0.49  | 161146 | 1  | 0.02395222 | 2.12453747 | 0.082093158 | 2.517023e-59  | 2.7796154e-105 | 0.032027602 |



|        |            |                                                                         |         |       |        |    |            |            |             |               |                |             |
|--------|------------|-------------------------------------------------------------------------|---------|-------|--------|----|------------|------------|-------------|---------------|----------------|-------------|
| O70404 | Vamp8      | Vesicle-associated membrane protein 8                                   | 70.24   | 16.83 | 11451  | 2  | 0.02411946 | 1.38383685 | 0.082567206 | 5.1594882e-59 | 6.8408879e-105 | 0.032212545 |
| Q9ESX5 | Dkc1       | H/ACA ribonucleoprotein complex subunit DKC1                            | 849.71  | 35.76 | 57402  | 16 | 0.02420669 | 0.52563732 | 0.08276657  | 1.0557906e-58 | 1.6777963e-104 | 0.032290325 |
| O88902 | Ptpn23     | Tyrosine-protein phosphatase non-receptor type 23                       | 87.02   | 1.73  | 163454 | 2  | 0.02444372 | 3.3556974  | 0.083477054 | 2.1567515e-58 | 4.1057433e-104 | 0.032567511 |
| Q8JZN5 | Acad9      | Acyl-CoA dehydrogenase family member 9, mitochondrial                   | 411.4   | 13.6  | 68722  | 8  | 0.02447541 | 1.69731438 | 0.083485428 | 4.3981804e-58 | 1.0002579e-103 | 0.032570778 |
| P0C0A2 | Vps36      | Vacuolar protein-sorting-associated protein 36                          | 173.53  | 11.14 | 43718  | 4  | 0.02453385 | 2.09247278 | 0.08355716  | 8.9535659e-58 | 2.4334558e-103 | 0.032598763 |
| Q8R3C0 | Mcmbp      | Mini-chromosome maintenance complex-binding protein                     | 370.98  | 17.45 | 72891  | 7  | 0.02455498 | 1.76461179 | 0.08355716  | 1.819569e-57  | 5.9091679e-103 | 0.032598763 |
| Q6P6U0 | Fgr        | Tyrosine-protein kinase Fgr                                             | 82.48   | 2.9   | 58821  | 2  | 0.02459005 | 1.76626811 | 0.083576888 | 3.6913905e-57 | 1.4332349e-102 | 0.03260646  |
| Q8BP40 | Acp6       | Lysophosphatidic acid phosphatase type 6                                | 274.33  | 20.33 | 47625  | 6  | 0.02465363 | 1.64330606 | 0.08358021  | 7.4758372e-57 | 3.4711885e-102 | 0.032607756 |
| Q9QYR9 | Acot2      | Acyl-coenzyme A thioesterase 2, mitochondrial                           | 199.17  | 11.48 | 49657  | 4  | 0.02467854 | 1.62563695 | 0.08358021  | 1.5113934e-56 | 8.3912949e-102 | 0.032607756 |
| O08583 | Alyref     | THO complex subunit 4                                                   | 441.15  | 47.06 | 26940  | 6  | 0.02467885 | 0.70762516 | 0.08358021  | 3.0502994e-56 | 2.0258813e-101 | 0.032607756 |
| Q9CRB9 | Chchd3     | MICOS complex subunit Mic19                                             | 349.08  | 19.82 | 26335  | 6  | 0.02477653 | 0.73182971 | 0.083694544 | 6.1454564e-56 | 4.8863809e-101 | 0.032652362 |
| Q8BH43 | Wasf2      | Wiskott-Aldrich syndrome protein family member 2                        | 243.43  | 10.66 | 54074  | 4  | 0.02479965 | 1.64335568 | 0.083694544 | 1.2359815e-55 | 1.1758128e-100 | 0.032652362 |
| Q9D2Y4 | Mlk1       | Mixed lineage kinase domain-like protein                                | 67.31   | 2.97  | 54317  | 1  | 0.02480055 | 1.85679304 | 0.083694544 | 2.4815062e-55 | 2.8257531e-100 | 0.032652362 |
| P80318 | Cct3       | T-complex protein 1 subunit gamma                                       | 1368.41 | 40.92 | 60630  | 24 | 0.02494954 | 1.602542   | 0.083991984 | 4.9735191e-55 | 6.7844277e-100 | 0.032768404 |
| P56383 | Atp5mc2    | ATP synthase F(0) complex subunit C2, mitochondrial                     | 220.62  | 26.03 | 15476  | 2  | 0.02495472 | 0.03492645 | 0.083991984 | 9.9507693e-55 | 1.6238873e-99  | 0.032768404 |
| Q9D967 | Mdp1       | Magnesium-dependent phosphatase 1                                       | 67.25   | 14.02 | 18582  | 1  | 0.02503039 | 6.32807386 | 0.083991984 | 1.9874372e-54 | 3.8828906e-99  | 0.032768404 |
| Q68FR7 | Ltv1       | Protein LTV1 homolog                                                    | 57.63   | 2.55  | 53562  | 1  | 0.02503165 | 3.09972878 | 0.083991984 | 3.9625382e-54 | 9.2656536e-99  | 0.032768404 |
| Q62384 | Zpr1       | Zinc finger protein ZPR1                                                | 148.03  | 7.63  | 50715  | 3  | 0.02504749 | 1.55288962 | 0.083991984 | 7.8867168e-54 | 2.208903e-98   | 0.032768404 |
| O08730 | Gyg1       | Glycogenin-1                                                            | 50.71   | 3     | 37378  | 1  | 0.02506521 | 2.46067477 | 0.083991984 | 1.5669718e-53 | 5.259766e-98   | 0.032768404 |
| P60517 | Gabarap    | Gamma-aminobutyric acid receptor-associated protein                     | 186.83  | 21.37 | 13918  | 3  | 0.02510424 | 1.84957362 | 0.08402416  | 3.1079049e-53 | 1.2509305e-97  | 0.032780957 |
| Q9Z204 | Hnrmpc     | Heterogeneous nuclear ribonucleoproteins C1/C2                          | 786.93  | 37.7  | 34385  | 12 | 0.02524308 | 0.68455267 | 0.084389931 | 6.1534015e-53 | 2.9706135e-97  | 0.032923658 |
| Q9JL35 | Hmgn5      | High mobility group nucleosome-binding domain-containing protein 5      | 149.55  | 10.1  | 45344  | 4  | 0.02527542 | 0.50740918 | 0.08439707  | 1.216195e-52  | 7.0339581e-97  | 0.032926444 |
| Q8CFE2 | Hpf1       | Histone PARylation factor 1                                             | 112.24  | 7.8   | 39291  | 2  | 0.02530434 | 2.072533   | 0.08439707  | 2.3995566e-52 | 1.6631932e-96  | 0.032926444 |
| Q9D0G0 | Mrps30     | 28S ribosomal protein S30, mitochondrial                                | 146.17  | 7.69  | 49939  | 3  | 0.02544097 | 0.61952284 | 0.084706249 | 4.7260471e-52 | 3.9273114e-96  | 0.033047066 |
| P80316 | Cct5       | T-complex protein 1 subunit epsilon                                     | 1538.34 | 51.2  | 59624  | 25 | 0.02545638 | 1.56915029 | 0.084706249 | 9.2918837e-52 | 9.2472199e-96  | 0.033047066 |
| P62715 | Ppp2cb     | Serine/threonine-protein phosphatase 2A catalytic subunit beta isoform  | 493.98  | 33.33 | 35575  | 9  | 0.02554984 | 1.71768905 | 0.084832536 | 1.8236755e-51 | 2.1747994e-95  | 0.033096335 |
| Q8K2T1 | Nmral1     | NmrA-like family domain-containing protein 1                            | 111.05  | 7.77  | 34376  | 3  | 0.02557357 | 2.31253356 | 0.084832536 | 3.5729659e-51 | 5.1033319e-95  | 0.033096335 |
| Q8VDV3 | Rab3il1    | Guanine nucleotide exchange factor for Rab-3A                           | 173.82  | 8.09  | 42713  | 2  | 0.02560533 | 1.89937402 | 0.084832536 | 6.9879064e-51 | 1.1959997e-94  | 0.033096335 |
| Q3UW53 | Fam129a    | Protein Niban                                                           | 859.21  | 21.6  | 102649 | 18 | 0.02561319 | 1.29952012 | 0.084832536 | 1.364274e-50  | 2.7990004e-94  | 0.033096335 |
| Q8R2E9 | Ero1b      | ERO1-like protein beta                                                  | 223.18  | 8.99  | 53518  | 4  | 0.02575067 | 2.36895812 | 0.085134393 | 2.6588378e-50 | 6.5435044e-94  | 0.033214101 |
| O70194 | Eif3d      | Eukaryotic translation initiation factor 3 subunit D                    | 987.19  | 39.42 | 63989  | 16 | 0.02576396 | 1.59469095 | 0.085134393 | 5.172699e-50  | 1.525421e-93   | 0.033214101 |
| Q6AYH5 | Dctn2      | Dynactin subunit 2                                                      | 166.19  | 8.21  | 44148  | 3  | 0.02587724 | 4.18954422 | 0.085355073 | 1.0045628e-49 | 3.5519995e-93  | 0.033300196 |
| P54775 | Psmc4      | 26S proteasome regulatory subunit 6B                                    | 397.47  | 23.92 | 47408  | 8  | 0.02589231 | 1.32897337 | 0.085355073 | 1.9474706e-49 | 8.2504117e-93  | 0.033300196 |
| Q60864 | Stip1      | Stress-induced-phosphoprotein 1                                         | 1023.65 | 37.57 | 62582  | 19 | 0.02592044 | 1.57235119 | 0.085355073 | 3.7687564e-49 | 1.9141324e-92  | 0.033300196 |
| Q63468 | Prpsap1    | Phosphoribosyl pyrophosphate synthase-associated protein 1              | 397.12  | 25.84 | 39436  | 7  | 0.02607853 | 1.80693771 | 0.085776731 | 7.2804452e-49 | 4.4349161e-92  | 0.033464701 |
| Q6DGG1 | Abhd14b    | Protein ABHD14B                                                         | 72.93   | 10    | 22618  | 2  | 0.02615834 | 3.04490544 | 0.085940228 | 1.4039445e-48 | 1.0243903e-91  | 0.033528487 |
| Q9CR59 | Gadd45gip1 | Growth arrest and DNA damage-inducible proteins-interacting protein 1 1 | 51.98   | 4.05  | 25820  | 1  | 0.02625971 | 1.64051839 | 0.08617412  | 2.7025482e-48 | 2.3613919e-91  | 0.033619737 |
| P45952 | Acadm      | Medium-chain specific acyl-CoA dehydrogenase, mitochondrial             | 522.56  | 31.12 | 46481  | 11 | 0.02634563 | 1.44040644 | 0.086356799 | 5.193114e-48  | 5.430905e-91   | 0.033691007 |
| P04692 | Tpm1       | Tropomyosin alpha-1 chain                                               | 379.17  | 16.9  | 32681  | 7  | 0.02640114 | 2.43778701 | 0.086439517 | 9.961221e-48  | 1.2464329e-90  | 0.033723278 |



|        |            |                                                                            |         |       |        |    |            |            |             |               |               |             |
|--------|------------|----------------------------------------------------------------------------|---------|-------|--------|----|------------|------------|-------------|---------------|---------------|-------------|
| Q8R1B4 | Eif3c      | Eukaryotic translation initiation factor 3 subunit C                       | 910.54  | 18.22 | 105531 | 16 | 0.02649007 | 1.49482651 | 0.086561235 | 1.907335e-47  | 2.8558303e-90 | 0.033770765 |
| Q99K23 | Ufsp2      | Ufm1-specific protease 2                                                   | 168.22  | 8.24  | 52515  | 4  | 0.02649896 | 1.99203217 | 0.086561235 | 3.6456121e-47 | 6.5294274e-90 | 0.033770765 |
| Q99KP3 | Cry11      | Lambda-crystallin homolog                                                  | 78.16   | 5.64  | 35209  | 1  | 0.02661056 | 3.030139   | 0.086826455 | 6.9557248e-47 | 1.4912439e-89 | 0.033874237 |
| O35955 | Psmb10     | Proteasome subunit beta type-10                                            | 329.37  | 28.57 | 29063  | 5  | 0.02669771 | 0.76397497 | 0.087011363 | 1.3247751e-46 | 3.3976366e-89 | 0.033946377 |
| P49615 | Cdk5       | Cyclin-dependent-like kinase 5                                             | 85.69   | 5.14  | 33288  | 2  | 0.02673236 | 2.28012899 | 0.087024947 | 2.5186578e-46 | 7.7250217e-89 | 0.033951676 |
| P0CC09 | Hist2h2aa3 | Histone H2A type 2-A 3                                                     | 783.08  | 58.46 | 14095  | 9  | 0.02677283 | 0.23753055 | 0.08705743  | 4.7799437e-46 | 1.7539225e-88 | 0.033964349 |
| Q9CPQ1 | Cox6c      | Cytochrome c oxidase subunit 6C                                            | 148.04  | 48.68 | 8469   | 3  | 0.02699581 | 1.51952271 | 0.087682625 | 9.0552903e-46 | 3.9762768e-88 | 0.034208261 |
| Q9DBH5 | Lman2      | Vesicular integral-membrane protein VIP36                                  | 239.28  | 20.67 | 40430  | 5  | 0.02705431 | 1.67948783 | 0.087772778 | 1.7124083e-45 | 8.9803806e-88 | 0.034243433 |
| C0HKD8 | Mfap1a     | Microfibrillar-associated protein 1A                                       | 146.5   | 9.57  | 51954  | 3  | 0.02727233 | 0.47624901 | 0.088382834 | 3.2324887e-45 | 2.0247629e-87 | 0.034481439 |
| P21107 | Tpm3       | Tropomyosin alpha-3 chain                                                  | 568.34  | 22.46 | 32994  | 10 | 0.02733401 | 1.98969991 | 0.088479142 | 6.091031e-45  | 4.5482551e-87 | 0.034519012 |
| Q80TY0 | Fnbp1      | Formin-binding protein 1                                                   | 434.16  | 17.05 | 71344  | 8  | 0.02739869 | 2.53916906 | 0.088588079 | 1.1456925e-44 | 1.0199306e-86 | 0.034561512 |
| Q9CQH3 | Ndufb5     | NADH dehydrogenase [ubiquinone] 1 beta subcomplex subunit 5, mitochondrial | 66.67   | 5.82  | 21710  | 1  | 0.02747094 | 1.99035374 | 0.08867058  | 2.1511377e-44 | 2.2831321e-86 | 0.034593699 |
| Q569Z6 | Thrap3     | Thyroid hormone receptor-associated protein 3                              | 312.61  | 9.25  | 108178 | 6  | 0.02748633 | 0.52883361 | 0.08867058  | 4.0317217e-44 | 5.1013684e-86 | 0.034593699 |
| Q5XJY5 | Arcn1      | Coatomer subunit delta                                                     | 892.83  | 36.01 | 57229  | 18 | 0.02753361 | 1.50215053 | 0.08872285  | 7.5428326e-44 | 1.138524e-85  | 0.034614092 |
| Q80W54 | Zmpste24   | CAAX prenyl protease 1 homolog                                             | 109.11  | 7.37  | 54735  | 3  | 0.02756925 | 1.80146834 | 0.088728771 | 1.4086378e-43 | 2.5370371e-85 | 0.034616401 |
| P28740 | Kif2a      | Kinesin-like protein KIF2A                                                 | 116.47  | 3.4   | 79756  | 2  | 0.02761306 | 2.45429703 | 0.088728771 | 2.6259382e-43 | 5.6455029e-85 | 0.034616401 |
| Q8BL97 | Srsf7      | Serine/arginine-rich splicing factor 7                                     | 374.51  | 22.1  | 30818  | 8  | 0.02762868 | 0.5454023  | 0.088728771 | 4.8864037e-43 | 1.2543715e-84 | 0.034616401 |
| Q9CPQ8 | Atp5mg     | ATP synthase subunit g, mitochondrial                                      | 227     | 33.01 | 11425  | 4  | 0.0276785  | 1.62758949 | 0.088758205 | 9.0763913e-43 | 2.7838538e-84 | 0.034627885 |
| P43247 | Msh2       | DNA mismatch repair protein Msh2                                           | 690.67  | 13.48 | 104151 | 11 | 0.02770002 | 1.69006561 | 0.088758205 | 1.682889e-42  | 6.1685392e-84 | 0.034627885 |
| P97834 | Gps1       | COP9 signalosome complex subunit 1                                         | 267.39  | 15.07 | 53428  | 6  | 0.02776538 | 1.66369159 | 0.08886788  | 3.1146945e-42 | 1.3651576e-83 | 0.034670673 |
| Q4KM73 | Cmpk1      | UMP-CMP kinase                                                             | 380.87  | 47.45 | 22169  | 8  | 0.02787168 | 1.43788524 | 0.089022113 | 5.7543004e-42 | 3.0159043e-83 | 0.034730845 |
| P35279 | Rab6a      | Ras-related protein Rab-6A                                                 | 581.69  | 35.58 | 23590  | 10 | 0.02788064 | 1.45661079 | 0.089022113 | 1.0611727e-41 | 6.6477432e-83 | 0.034730845 |
| O35382 | Exoc4      | Exocyst complex component 4                                                | 109.49  | 3.38  | 110545 | 2  | 0.02791135 | 2.24808361 | 0.089022113 | 1.9534188e-41 | 1.4637307e-82 | 0.034730845 |
| Q4QQR9 | Memo1      | Protein MEMO1                                                              | 49.26   | 4.71  | 33679  | 1  | 0.02793829 | 2.69034494 | 0.089022113 | 3.5893831e-41 | 3.2185813e-82 | 0.034730845 |
| Q9R1T4 | Sept6      | Septin-6                                                                   | 97.89   | 6.22  | 49620  | 3  | 0.02803327 | 2.47040071 | 0.089223352 | 6.583529e-41  | 7.0681102e-82 | 0.034809356 |
| Q61543 | Glg1       | Golgi apparatus protein 1                                                  | 951.04  | 17.45 | 133734 | 16 | 0.02830048 | 1.17886713 | 0.089932732 | 1.2053454e-40 | 1.5489214e-81 | 0.035086112 |
| P53996 | Cnbp       | Cellular nucleic acid-binding protein                                      | 330.92  | 43.26 | 19592  | 6  | 0.02834141 | 1.49134195 | 0.089932732 | 2.2028121e-40 | 3.3803342e-81 | 0.035086112 |
| P98078 | Dab2       | Disabled homolog 2                                                         | 1050.78 | 29.63 | 82312  | 15 | 0.02835007 | 1.513779   | 0.089932732 | 4.0184253e-40 | 7.3664592e-81 | 0.035086112 |
| P97930 | Dtymk      | Thymidylate kinase                                                         | 129.43  | 16.04 | 23915  | 3  | 0.02853903 | 2.63740429 | 0.090431661 | 7.3172215e-40 | 1.6035784e-80 | 0.035280762 |
| Q8CE96 | Trmt6      | tRNA (adenine(58)-N(1))-methyltransferase non-catalytic subunit TRM6       | 64.97   | 3.62  | 55518  | 1  | 0.02876752 | 3.03989515 | 0.091054622 | 1.3299879e-39 | 3.4797137e-80 | 0.035523803 |
| Q9Z1D1 | Eif3g      | Eukaryotic translation initiation factor 3 subunit G                       | 286.33  | 14.69 | 35638  | 5  | 0.02892087 | 1.65160598 | 0.09143862  | 2.4130131e-39 | 7.5236884e-80 | 0.035673615 |
| Q9EPL8 | Ipo7       | Importin-7                                                                 | 346.48  | 5.39  | 119486 | 5  | 0.02901933 | 2.06970152 | 0.091648434 | 4.370001e-39  | 1.6223181e-79 | 0.035755471 |
| Q9Z2W0 | Dnpep      | Aspartyl aminopeptidase                                                    | 418.5   | 23.68 | 52207  | 8  | 0.02914307 | 1.93444471 | 0.091827676 | 7.899736e-39  | 3.4908821e-79 | 0.0358254   |
| O55126 | Nipsnap2   | Protein NipSnap homolog 2                                                  | 74.39   | 9.25  | 32933  | 2  | 0.02915366 | 1.8834629  | 0.091827676 | 1.4254505e-38 | 7.4938842e-79 | 0.0358254   |
| Q8C0C7 | Farsa      | Phenylalanine--tRNA ligase alpha subunit                                   | 426.86  | 15.94 | 57599  | 9  | 0.02917258 | 1.60787486 | 0.091827676 | 2.5674354e-38 | 1.606968e-78  | 0.0358254   |
| P46462 | Vcp        | Transitional endoplasmic reticulum ATPase                                  | 2920.47 | 60.79 | 89349  | 46 | 0.02923559 | 1.56080871 | 0.091924665 | 4.6158754e-38 | 3.4418691e-78 | 0.035863239 |
| O35459 | Ech1       | Delta(3,5)-Delta(2,4)-dienoyl-CoA isomerase, mitochondrial                 | 213.73  | 10.4  | 36118  | 3  | 0.02929722 | 1.29278301 | 0.092017112 | 8.2835238e-38 | 7.3595818e-78 | 0.035899306 |
| Q9JJ28 | Flii       | Protein flightless-1 homolog                                               | 579.02  | 10.46 | 144803 | 11 | 0.02939512 | 1.41215061 | 0.092152338 | 1.4838226e-37 | 1.5710537e-77 | 0.035952063 |
| Q8BJ71 | Nup93      | Nuclear pore complex protein Nup93                                         | 489.85  | 12.7  | 93281  | 10 | 0.0294241  | 1.5971349  | 0.092152338 | 2.6531021e-37 | 3.3468315e-77 | 0.035952063 |
| Q8BGD9 | Eif4b      | Eukaryotic translation initiation factor 4B                                | 620.45  | 20.79 | 68840  | 10 | 0.02944078 | 1.27314858 | 0.092152338 | 4.7351134e-37 | 7.1205715e-77 | 0.035952063 |
| Q09014 | Ncf1       | Neutrophil cytosol factor 1                                                | 306.56  | 13.85 | 44667  | 4  | 0.02946938 | 1.44938631 | 0.092152338 | 8.4354952e-37 | 1.5131869e-76 | 0.035952063 |
| P28352 | Apex1      | DNA-(apurinic or apyrimidinic site) lyase                                  | 455.02  | 35.33 | 35490  | 7  | 0.02956896 | 1.34403452 | 0.092362573 | 1.5000089e-36 | 3.2115084e-76 | 0.036034083 |
| P70315 | Was        | Wiskott-Aldrich syndrome protein homolog                                   | 155.03  | 13.08 | 54192  | 3  | 0.02972752 | 1.89485362 | 0.092756368 | 2.662438e-36  | 6.8018243e-76 | 0.036187717 |
| Q8C0E2 | Vps26b     | Vacuolar protein sorting-associated protein 26B                            | 159.01  | 9.23  | 39125  | 3  | 0.02985381 | 1.90740554 | 0.092962277 | 4.7170107e-36 | 1.4366959e-75 | 0.03626805  |
| Q62625 | Map1lc3b   | Microtubule-associated proteins 1A/1B light chain 3B                       | 59.17   | 9.86  | 16394  | 2  | 0.02985878 | 2.03107769 | 0.092962277 | 8.3417127e-36 | 3.027507e-75  | 0.03626805  |

|        |         |                                                                                 |         |       |        |    |            |            |             |               |               |             |
|--------|---------|---------------------------------------------------------------------------------|---------|-------|--------|----|------------|------------|-------------|---------------|---------------|-------------|
| P05964 | S100a6  | Protein S100-A6                                                                 | 256.42  | 40.45 | 10035  | 4  | 0.0298912  | 1.7135163  | 0.092962277 | 1.4724613e-35 | 6.3732156e-75 | 0.03626805  |
| Q99K01 | Pdxdc1  | Pyridoxal-dependent decarboxylase domain-containing protein 1                   | 76.39   | 2.8   | 87335  | 2  | 0.02999661 | 2.90676381 | 0.093188606 | 2.5943717e-35 | 1.3398479e-74 | 0.03635635  |
| P57716 | Nestn   | Nicastrin                                                                       | 165.31  | 6.36  | 78492  | 4  | 0.03003056 | 0.5977614  | 0.093192675 | 4.5626737e-35 | 2.8108321e-74 | 0.036357937 |
| Q9CR95 | Necap1  | Adaptin ear-binding coat-associated protein 1                                   | 132.55  | 17.45 | 29639  | 2  | 0.03013629 | 1.96537292 | 0.093328178 | 8.0094896e-35 | 5.8888593e-74 | 0.036410802 |
| Q5U211 | Snx3    | Sorting nexin-3                                                                 | 327.21  | 52.47 | 18762  | 6  | 0.03013961 | 1.43317384 | 0.093328178 | 1.4034204e-34 | 1.231152e-73  | 0.036410802 |
| Q8BFQ8 | Gatd1   | Glutamine amidotransferase-like class 1 domain-containing protein 1             | 117.08  | 10.45 | 23277  | 2  | 0.03049839 | 1.95600172 | 0.094336837 | 2.4545256e-34 | 2.5712898e-73 | 0.036804317 |
| O35326 | Srsf5   | Serine/arginine-rich splicing factor 5                                          | 196.89  | 14.5  | 30891  | 4  | 0.03062226 | 0.67863118 | 0.09455355  | 4.2849271e-34 | 5.3446506e-73 | 0.036888865 |
| Q8VD75 | Hip1    | Huntingtin-interacting protein 1                                                | 62.6    | 1.65  | 115202 | 1  | 0.03063469 | 4.19969695 | 0.09455355  | 7.4664596e-34 | 1.108414e-72  | 0.036888865 |
| Q99L04 | Dhrs1   | Dehydrogenase/reductase SDR family member 1                                     | 287.44  | 28.12 | 34005  | 6  | 0.03069634 | 1.56323738 | 0.094626897 | 1.2986158e-33 | 2.2961784e-72 | 0.036917481 |
| Q9JK81 | Myg1    | UPF0160 protein MYG1, mitochondrial                                             | 436.13  | 21.32 | 42723  | 7  | 0.03072474 | 1.67905327 | 0.094626897 | 2.2544502e-33 | 4.7490551e-72 | 0.036917481 |
| Q8R5A3 | Apbb1ip | Amyloid beta A4 precursor protein-binding family B member 1-interacting protein | 68.3    | 5.07  | 74319  | 2  | 0.03086109 | 3.78145633 | 0.094944412 | 3.9065545e-33 | 9.8097224e-72 | 0.037041355 |
| Q3TIV5 | Zc3h15  | Zinc finger CCCH domain-containing protein 15                                   | 188.14  | 8.22  | 48327  | 3  | 0.03092117 | 1.60340225 | 0.095026855 | 6.7567783e-33 | 2.0214847e-71 | 0.037073519 |
| Q9DBB8 | Dhdh    | Trans-1,2-dihydrobenzene-1,2-diol dehydrogenase                                 | 57.41   | 3.6   | 36301  | 1  | 0.03095805 | 2.53325757 | 0.095037898 | 1.16648e-32   | 4.1590277e-71 | 0.037077827 |
| Q8BGH2 | Samm50  | Sorting and assembly machinery component 50 homolog                             | 636.53  | 35.18 | 51864  | 13 | 0.03099964 | 1.50254686 | 0.095063356 | 2.0100462e-32 | 8.5452393e-71 | 0.03708776  |
| Q8K2C9 | Hacd3   | Very-long-chain (3R)-3-hydroxyacyl-CoA dehydratase 3                            | 39.76   | 2.21  | 43131  | 1  | 0.03103817 | 1.9784E-06 | 0.095079386 | 3.4572054e-32 | 1.7532609e-70 | 0.037094013 |
| Q6NV83 | U2surp  | U2 snRNP-associated SURP motif-containing protein                               | 284.9   | 6.9   | 118261 | 7  | 0.03113387 | 1.40876739 | 0.095270319 | 5.9351815e-32 | 3.5922961e-70 | 0.037168504 |
| Q61390 | Cct6b   | T-complex protein 1 subunit zeta-2                                              | 295.82  | 13.75 | 58185  | 7  | 0.03118866 | 1.49573849 | 0.095325077 | 1.0170253e-31 | 7.3459712e-70 | 0.037189867 |
| Q5DQR4 | Stxbp5l | Syntaxin-binding protein 5-like                                                 | 39.04   | 0.93  | 131844 | 1  | 0.03121855 | 1.92836955 | 0.095325077 | 1.7394733e-31 | 1.4998882e-69 | 0.037189867 |
| P18665 | Mrpl3   | 39S ribosomal protein L3, mitochondrial                                         | 51.24   | 2.02  | 38253  | 1  | 0.0315131  | 2.95230005 | 0.09612169  | 2.9695543e-31 | 3.0585119e-69 | 0.037500655 |
| P39749 | Fen1    | Flap endonuclease 1                                                             | 554.75  | 21.43 | 42315  | 9  | 0.03165576 | 1.41058337 | 0.09645379  | 5.0600119e-31 | 6.2123221e-69 | 0.03763022  |
| Q8R1S4 | Mtss1   | Metastasis suppressor protein 1                                                 | 241.07  | 8.83  | 82408  | 5  | 0.03179857 | 1.85792331 | 0.096785634 | 8.6059306e-31 | 1.2588029e-68 | 0.037759684 |
| Q4V7A6 | Phf10   | PHD finger protein 10                                                           | 39.26   | 2.41  | 55884  | 1  | 0.03185501 | 2.99353673 | 0.096804326 | 1.4609301e-30 | 2.5446331e-68 | 0.037766977 |
| Q9D8N0 | Eef1g   | Elongation factor 1-gamma                                                       | 1473.49 | 69.57 | 50061  | 24 | 0.03189915 | 1.34002173 | 0.096804326 | 2.4754013e-30 | 5.1360315e-68 | 0.037766977 |
| Q8QZZ7 | Tprkb   | EKC/KEOPS complex subunit Tprkb                                                 | 127.57  | 10.29 | 19556  | 2  | 0.03190643 | 2.66133625 | 0.096804326 | 4.186447e-30  | 1.0351844e-67 | 0.037766977 |
| Q62825 | Exoc3   | Exocyst complex component 3                                                     | 39.4    | 1.46  | 86497  | 1  | 0.03223375 | 1.89177819 | 0.097693575 | 7.0668957e-30 | 2.0842562e-67 | 0.038113906 |
| Q9EPB4 | Pycard  | Apoptosis-associated speck-like protein containing a CARD                       | 168.67  | 25.39 | 21459  | 3  | 0.03232989 | 1.98337564 | 0.097872118 | 1.1906774e-29 | 4.1790805e-67 | 0.038183562 |
| Q9D7X3 | Dusp3   | Dual specificity protein phosphatase 3                                          | 600.66  | 59.46 | 20472  | 10 | 0.03236122 | 1.52825599 | 0.097872118 | 2.0023553e-29 | 8.3634487e-67 | 0.038183562 |
| Q99K85 | Psat1   | Phosphoserine aminotransferase                                                  | 1514.64 | 60.27 | 40473  | 25 | 0.03240678 | 1.71207157 | 0.097906209 | 3.3610039e-29 | 1.6716139e-66 | 0.038196862 |
| Q3ULJ0 | Gpd1l   | Glycerol-3-phosphate dehydrogenase 1-like protein                               | 152.89  | 10.54 | 38226  | 3  | 0.03245336 | 1.82724    | 0.097943281 | 5.6308896e-29 | 3.3363603e-66 | 0.038211325 |
| Q8K298 | Anln    | Anillin                                                                         | 413.93  | 10.17 | 122794 | 7  | 0.03257044 | 1.69697771 | 0.098054939 | 9.4159548e-29 | 6.649547e-66  | 0.038254888 |
| Q9D8B3 | Chmp4b  | Charged multivesicular body protein 4b                                          | 299.1   | 21.43 | 24936  | 4  | 0.03258381 | 1.56955104 | 0.098054939 | 1.5715577e-28 | 1.322523e-65  | 0.038254888 |
| P97371 | Psme1   | Proteasome activator complex subunit 1                                          | 295.29  | 24.9  | 28673  | 5  | 0.03262202 | 3.19165899 | 0.098054939 | 2.6180271e-28 | 2.6274462e-65 | 0.038254888 |
| A2BDX3 | Mocs3   | Adenylyltransferase and sulfurtransferase MOCS3                                 | 100.13  | 5.65  | 49375  | 3  | 0.03262774 | 2.01815533 | 0.098054939 | 4.3530639e-28 | 5.2129221e-65 | 0.038254888 |
| Q6PFR5 | Tra2a   | Transformer-2 protein homolog alpha                                             | 175.87  | 11.39 | 32316  | 3  | 0.03268065 | 0.51124908 | 0.098110666 | 7.2242422e-28 | 1.0331841e-64 | 0.038276628 |
| Q9QY17 | Pacsin2 | Protein kinase C and casein kinase substrate in neurons 2 protein               | 164.27  | 8.4   | 55978  | 4  | 0.03278299 | 2.65403605 | 0.098314523 | 1.1966444e-27 | 2.0447016e-64 | 0.038356161 |
| Q8R5J9 | Arl6ip5 | PRA1 family protein 3                                                           | 78.42   | 19.68 | 21558  | 2  | 0.03296697 | 2.0875106  | 0.09857753  | 1.978394e-27  | 4.038664e-64  | 0.03845877  |
| P28271 | Aco1    | Cytoplasmic aconitate hydratase                                                 | 242.46  | 7.76  | 98126  | 5  | 0.03298348 | 1.75288802 | 0.09857753  | 3.2646339e-27 | 7.956282e-64  | 0.03845877  |
| P59325 | Eif5    | Eukaryotic translation initiation factor 5                                      | 385.12  | 19.35 | 48968  | 8  | 0.03302956 | 1.63705667 | 0.09857753  | 5.3768695e-27 | 1.5653692e-63 | 0.03845877  |
| P45376 | Akr1b1  | Aldose reductase                                                                | 1012.93 | 50.32 | 35732  | 18 | 0.03303845 | 1.69751621 | 0.09857753  | 8.8388757e-27 | 3.0757104e-63 | 0.03845877  |
| Q9DAR7 | Dcps    | m7GpppX diphosphatase                                                           | 448.69  | 35.5  | 38988  | 9  | 0.03304333 | 1.95285444 | 0.09857753  | 1.4502281e-26 | 6.0368266e-63 | 0.03845877  |

|        |          |                                                                 |         |       |        |    |            |            |             |               |                |             |
|--------|----------|-----------------------------------------------------------------|---------|-------|--------|----|------------|------------|-------------|---------------|----------------|-------------|
| P40142 | Tkt      | Transketolase                                                   | 2339.46 | 60.51 | 67630  | 35 | 0.03312203 | 1.55656044 | 0.098709186 | 2.3749069e-26 | 1.1836448e-62  | 0.038510134 |
| Q6MG61 | Clic1    | Chloride intracellular channel protein 1                        | 1265.48 | 61.41 | 26981  | 19 | 0.03330939 | 1.5954734  | 0.099164034 | 3.8817456e-26 | 2.3168026e-62  | 0.038687587 |
| Q5SF07 | Igf2bp2  | Insulin-like growth factor 2 mRNA-binding protein 2             | 167.13  | 5.74  | 65584  | 4  | 0.03346174 | 1.56202421 | 0.099513814 | 6.3325262e-26 | 4.5225556e-62  | 0.038824049 |
| Q8C0L6 | Paox     | Peroxisomal N(1)-acetyl-spermine/spermidine oxidase             | 82.37   | 3.17  | 55447  | 1  | 0.03364952 | 2.5670389  | 0.099826483 | 1.0310876e-25 | 8.8074373e-62  | 0.038946033 |
| Q91XD7 | Creld1   | Cysteine-rich with EGF-like domain protein 1                    | 54.31   | 2.62  | 45718  | 1  | 0.03369594 | 6.71837951 | 0.099826483 | 1.6756451e-25 | 1.7106163e-61  | 0.038946033 |
| Q9DAA6 | Exosc1   | Exosome complex component CSL4                                  | 37.13   | 5.64  | 21424  | 1  | 0.0337399  | 2.30208604 | 0.099826483 | 2.7179135e-25 | 3.3177684e-61  | 0.038946033 |
| Q9JK91 | Mlh1     | DNA mismatch repair protein Mlh1                                | 40.28   | 1.05  | 84670  | 1  | 0.03374073 | 3.18003247 | 0.099826483 | 4.4000289e-25 | 6.4259796e-61  | 0.038946033 |
| Q9JIY5 | Htra2    | Serine protease HTRA2, mitochondrial                            | 173.32  | 17.47 | 49348  | 4  | 0.0337417  | 1.73349812 | 0.099826483 | 7.1095311e-25 | 1.2433644e-60  | 0.038946033 |
| Q6P9P6 | Kif11    | Kinesin-like protein KIF11                                      | 112.39  | 3.99  | 118027 | 3  | 0.03385794 | 1.92335581 | 0.10006669  | 1.1465451e-24 | 2.4033748e-60  | 0.039039746 |
| P08905 | Lyz2     | Lysozyme C-2                                                    | 288.13  | 31.76 | 16689  | 3  | 0.03393092 | 1.57482452 | 0.10017867  | 1.8454628e-24 | 4.63262306e-60 | 0.039083434 |
| P35276 | Rab3d    | Ras-related protein Rab-3D                                      | 254.56  | 17.81 | 24416  | 4  | 0.03408198 | 1.53232201 | 0.10041668  | 2.9647128e-24 | 8.9288689e-60  | 0.039176291 |
| Q6P9R2 | Oxsr1    | Serine/threonine-protein kinase OSR1                            | 41.43   | 1.52  | 58214  | 1  | 0.03410695 | 1.99127624 | 0.10041668  | 4.7535968e-24 | 1.7156159e-59  | 0.039176291 |
| Q9CR51 | Atp6v1g1 | V-type proton ATPase subunit G 1                                | 237.23  | 36.44 | 13724  | 3  | 0.03411705 | 1.36159699 | 0.10041668  | 7.6071792e-24 | 3.2924267e-59  | 0.039176291 |
| P61222 | Abce1    | ATP-binding cassette sub-family E member 1                      | 1040.79 | 34.89 | 67314  | 16 | 0.0344203  | 1.67962367 | 0.1010968   | 1.2150265e-23 | 6.3116075e-59  | 0.039441631 |
| Q8K411 | Pitrm1   | Presequence protease, mitochondrial                             | 253.68  | 9.46  | 117372 | 6  | 0.03442228 | 2.09191227 | 0.1010968   | 1.9369029e-23 | 1.2055656e-58  | 0.039441631 |
| A2A432 | Cul4b    | Cullin-4B                                                       | 188.72  | 3.2   | 110699 | 4  | 0.03445436 | 1.43655863 | 0.1010968   | 3.0816914e-23 | 2.3003913e-58  | 0.039441631 |
| Q9CY57 | Chtop    | Chromatin target of PRMT1 protein                               | 264.65  | 10.44 | 26585  | 3  | 0.03460368 | 0.53418231 | 0.10143071  | 4.8936042e-23 | 4.383887e-58   | 0.0395719   |
| P70460 | Vasp     | Vasodilator-stimulated phosphoprotein                           | 356.57  | 20.8  | 39667  | 7  | 0.03474841 | 1.45818385 | 0.10165983  | 7.7557916e-23 | 8.3354497e-58  | 0.039661289 |
| F1LQ48 | Hnrnp1   | Heterogeneous nuclear ribonucleoprotein L                       | 1818.88 | 60.03 | 67903  | 26 | 0.03475306 | 0.61432382 | 0.10165983  | 1.2268182e-22 | 1.5813631e-57  | 0.039661289 |
| Q9DCH4 | Eif3f    | Eukaryotic translation initiation factor 3 subunit F            | 516.21  | 24.93 | 37984  | 8  | 0.0348276  | 1.39231244 | 0.10175933  | 1.9368246e-22 | 2.9969776e-57  | 0.03970011  |
| Q6NZQ2 | Ddx31    | Probable ATP-dependent RNA helicase DDX31                       | 67.29   | 1.89  | 76913  | 1  | 0.03485931 | 2.33499103 | 0.10175933  | 3.0517963e-22 | 5.670585e-57   | 0.03970011  |
| A9UMV8 | H2afj    | Histone H2A.J                                                   | 646.79  | 58.91 | 14045  | 8  | 0.03489401 | 0.26332684 | 0.10175933  | 4.7992699e-22 | 1.0715721e-56  | 0.03970011  |
| O35092 | Timm17a  | Mitochondrial import inner membrane translocase subunit Tim17-A | 93.75   | 29.82 | 18038  | 2  | 0.03505455 | 0.42592945 | 0.10212319  | 7.5326598e-22 | 2.0223329e-56  | 0.039842065 |
| Q78PY7 | Snd1     | Staphylococcal nuclease domain-containing protein 1             | 2541.63 | 56.15 | 102088 | 42 | 0.03513285 | 1.30835456 | 0.10224699  | 1.179979e-21  | 3.8077277e-56  | 0.039890364 |
| Q9D6Y9 | Gbe1     | 1,4-alpha-glucan-branching enzyme                               | 37.14   | 1.85  | 80364  | 1  | 0.03524366 | 2.91185944 | 0.10246502  | 1.8448121e-21 | 7.1574923e-56  | 0.039975423 |
| Q66HA6 | Arl8b    | ADP-ribosylation factor-like protein 8B                         | 614.67  | 67.2  | 21539  | 12 | 0.03531184 | 1.57869756 | 0.10255882  | 2.8785986e-21 | 1.3428334e-55  | 0.040012018 |
| Q91WM3 | Rrp9     | U3 small nucleolar RNA-interacting protein 2                    | 255.29  | 12.63 | 52107  | 6  | 0.03537476 | 0.46356213 | 0.10263715  | 4.4829138e-21 | 2.5153796e-55  | 0.040042577 |
| O88544 | Cops4    | COP9 signalosome complex subunit 4                              | 427.04  | 26.11 | 46285  | 7  | 0.03545119 | 1.73882914 | 0.10275447  | 6.967695e-21  | 4.7046164e-55  | 0.040088349 |
| Q8VE97 | Srsf4    | Serine/arginine-rich splicing factor 4                          | 149.19  | 6.95  | 55979  | 3  | 0.03553438 | 0.65148786 | 0.10285441  | 1.0808528e-20 | 8.7848967e-55  | 0.040127339 |
| Q641Z4 | Cdk9     | Cyclin-dependent kinase 9                                       | 87.05   | 6.45  | 42762  | 2  | 0.03555772 | 1.87489985 | 0.10285441  | 1.6733692e-20 | 1.6376374e-54  | 0.040127339 |
| Q9CZY3 | Ube2v1   | Ubiquitin-conjugating enzyme E2 variant 1                       | 398.85  | 36.05 | 16355  | 7  | 0.03562241 | 1.37253271 | 0.10293723  | 2.5856159e-20 | 3.0491486e-54  | 0.040159653 |
| O70370 | Ctss     | Cathepsin S                                                     | 640.11  | 39.12 | 38475  | 8  | 0.03597166 | 1.4549338  | 0.10384135  | 3.9873324e-20 | 5.6685695e-54  | 0.040512383 |
| Q6P7Q1 | Babam2   | BRISC and BRCA1-A complex member 2                              | 156.94  | 10.18 | 43559  | 3  | 0.03605698 | 2.01016288 | 0.10392794  | 6.13686e-20   | 1.0498172e-53  | 0.040546165 |
| P02262 |          | Histone H2A type 1                                              | 644.55  | 58.46 | 14077  | 8  | 0.03607446 | 0.26000611 | 0.10392794  | 9.4265877e-20 | 1.9409879e-53  | 0.040546165 |
| Q64012 | Raly     | RNA-binding protein Raly                                        | 512.55  | 32.37 | 33188  | 9  | 0.03612064 | 0.50908117 | 0.10395607  | 1.4451286e-19 | 3.5845526e-53  | 0.040557139 |
| P13832 | Rlc-a    | Myosin regulatory light chain RLC-A                             | 199.63  | 29.07 | 19895  | 4  | 0.03621968 | 2.33178649 | 0.10413613  | 2.2110642e-19 | 6.6107489e-53  | 0.040627388 |
| P30999 | Ctnnd1   | Catenin delta-1                                                 | 200.81  | 6.18  | 104925 | 5  | 0.03626734 | 2.15984194 | 0.10416826  | 3.3762782e-19 | 1.216996e-52   | 0.040639921 |
| O35142 | Copb2    | Coatomer subunit beta'                                          | 807.7   | 26.52 | 102551 | 15 | 0.03646716 | 1.57487994 | 0.10463693  | 5.1453662e-19 | 2.2373118e-52  | 0.040822768 |
| P39032 | Rpl36    | 60S ribosomal protein L36                                       | 155.51  | 19.05 | 12268  | 3  | 0.03664268 | 0.69475546 | 0.105035    | 7.8259074e-19 | 4.1024907e-52  | 0.040978068 |
| Q5M823 | Nudcd2   | NudC domain-containing protein 2                                | 356.7   | 43.95 | 17674  | 6  | 0.03673043 | 1.49592356 | 0.10518093  | 1.1879349e-18 | 7.5048156e-52  | 0.041035004 |
| Q505F5 | Lrrc47   | Leucine-rich repeat-containing protein 47                       | 210.41  | 12.39 | 63590  | 5  | 0.0368914  | 1.43892369 | 0.10541549  | 1.7996549e-18 | 1.3705706e-51  | 0.041126513 |
| O70551 | Srpk1    | SRSF protein kinase 1                                           | 288.67  | 11.27 | 73088  | 5  | 0.03694438 | 1.39154269 | 0.10541549  | 2.7209694e-18 | 2.4974075e-51  | 0.041126513 |
| Q922Y1 | Ubxn1    | UBX domain-containing protein 1                                 | 308.68  | 19.53 | 33573  | 5  | 0.03696548 | 2.01860216 | 0.10541549  | 4.1057743e-18 | 4.5442781e-51  | 0.041126513 |
| Q6URK4 | Hnrnpa3  | Heterogeneous nuclear ribonucleoprotein A3                      | 1382.9  | 50.66 | 39652  | 24 | 0.03699614 | 0.67466464 | 0.10541549  | 6.1830483e-18 | 8.2591034e-51  | 0.041126513 |
| P16045 | Lgals1   | Galectin-1                                                      | 590.81  | 54.07 | 14866  | 7  | 0.03699696 | 1.76094566 | 0.10541549  | 9.2927765e-18 | 1.4992051e-50  | 0.041126513 |



|        |           |                                                               |         |       |        |    |            |            |            |               |               |             |
|--------|-----------|---------------------------------------------------------------|---------|-------|--------|----|------------|------------|------------|---------------|---------------|-------------|
| Q8CIN4 | Pak2      | Serine/threonine-protein kinase PAK 2                         | 936.55  | 36.45 | 57930  | 14 | 0.03739615 | 1.62742915 | 0.10644667 | 1.3938717e-17 | 2.7186081e-50 | 0.041528815 |
| P59999 | Arpc4     | Actin-related protein 2/3 complex subunit 4                   | 556.58  | 51.79 | 19667  | 9  | 0.03748189 | 1.3885504  | 0.10658446 | 2.0865736e-17 | 4.9100845e-50 | 0.041582572 |
| Q9EPL9 | Acox3     | Peroxisomal acyl-coenzyme A oxidase 3                         | 253.98  | 11.71 | 78404  | 6  | 0.03756495 | 2.27338738 | 0.10665933 | 3.1172911e-17 | 8.8535287e-50 | 0.041611783 |
| Q9WVA3 | Bub3      | Mitotic checkpoint protein BUB3                               | 519.29  | 29.45 | 36955  | 9  | 0.03758294 | 1.16280411 | 0.10665933 | 4.6478586e-17 | 1.5938169e-49 | 0.041611783 |
| P62959 | Hint1     | Histidine triad nucleotide-binding protein 1                  | 189.29  | 42.06 | 13777  | 4  | 0.03772266 | 1.96953401 | 0.10694954 | 6.9160721e-17 | 2.8659228e-49 | 0.041725001 |
| P40124 | Cap1      | Adenylyl cyclase-associated protein 1                         | 2419.63 | 70.68 | 51565  | 33 | 0.03778533 | 1.46494874 | 0.10698471 | 1.0270612e-16 | 5.1428571e-49 | 0.041738724 |
| Q9CQA1 | Trappc5   | Trafficking protein particle complex subunit 5                | 105.25  | 19.15 | 20795  | 3  | 0.03781001 | 2.32439099 | 0.10698471 | 1.5221675e-16 | 9.2152261e-49 | 0.041738724 |
| Q5I0E7 | Tmed9     | Transmembrane emp24 domain-containing protein 9               | 314     | 20    | 27028  | 6  | 0.03796479 | 1.28257335 | 0.10719455 | 2.2514228e-16 | 1.6492621e-48 | 0.041820589 |
| O88958 | Gnpda1    | Glucosamine-6-phosphate isomerase 1                           | 43.28   | 9.69  | 32549  | 1  | 0.03796751 | 130176.145 | 0.10719455 | 3.3233746e-16 | 2.9453964e-48 | 0.041820589 |
| Q9CQ62 | Decr1     | 2,4-dienoyl-CoA reductase, mitochondrial                      | 110.5   | 9.25  | 36214  | 2  | 0.03799681 | 1.89381909 | 0.10719455 | 4.8958523e-16 | 5.2547154e-48 | 0.041820589 |
| Q8BX09 | Rbbp5     | Retinoblastoma-binding protein 5                              | 134.19  | 5.58  | 59098  | 3  | 0.03816977 | 0.76423784 | 0.10757621 | 7.1978572e-16 | 9.3631355e-48 | 0.041969488 |
| Q8BK72 | Mrps27    | 28S ribosomal protein S27, mitochondrial                      | 146.92  | 9.16  | 47779  | 3  | 0.03844309 | 2.15657913 | 0.10823966 | 1.0560955e-15 | 1.6646026e-47 | 0.042228326 |
| O35127 | Grc10     | Protein C10                                                   | 38.07   | 14.29 | 13194  | 1  | 0.03848278 | 1.19008198 | 0.10824466 | 1.5464196e-15 | 2.9506032e-47 | 0.042230277 |
| P68369 | Tuba1a    | Tubulin alpha-1A chain                                        | 2545.34 | 75.61 | 50136  | 37 | 0.03867877 | 1.52460803 | 0.1086546  | 2.2598251e-15 | 5.2233496e-47 | 0.042390209 |
| Q6ZQL4 | Wdr43     | WD repeat-containing protein 43                               | 573.44  | 24.82 | 75381  | 11 | 0.03870463 | 0.54005507 | 0.1086546  | 3.2956779e-15 | 9.224565e-47  | 0.042390209 |
| Q8VE37 | Rcc1      | Regulator of chromosome condensation                          | 719.9   | 32.54 | 44931  | 11 | 0.03905085 | 0.58031362 | 0.10951883 | 4.796631e-15  | 1.6271376e-46 | 0.04272738  |
| Q91YU8 | Ppan      | Suppressor of SWI4 1 homolog                                  | 200.54  | 9.36  | 52756  | 4  | 0.03920366 | 0.64911872 | 0.1097604  | 6.9670444e-15 | 2.860308e-46  | 0.042821622 |
| P60521 | Gabarapl2 | Gamma-aminobutyric acid receptor-associated protein-like 2    | 179.61  | 36.75 | 13667  | 4  | 0.03921387 | 2.22170779 | 0.1097604  | 1.0099055e-14 | 5.017696e-46  | 0.042821622 |
| P35821 | Ptpn1     | Tyrosine-protein phosphatase non-receptor type 1              | 289.01  | 15.51 | 49593  | 5  | 0.03930394 | 1.2438258  | 0.10990476 | 1.4609383e-14 | 8.7928175e-46 | 0.042877944 |
| Q61171 | Prdx2     | Peroxiredoxin-2                                               | 668.63  | 57.58 | 21779  | 11 | 0.03942907 | 1.47925573 | 0.11010948 | 2.1091194e-14 | 1.5383125e-45 | 0.042957812 |
| Q922U1 | Prpf3     | U4/U6 small nuclear ribonucleoprotein Prp3                    | 179.75  | 6.15  | 77455  | 4  | 0.03945429 | 0.72419451 | 0.11010948 | 3.0386992e-14 | 2.686277e-45  | 0.042957812 |
| Q9D6F9 | Tubb4a    | Tubulin beta-4A chain                                         | 2308.44 | 71.62 | 49586  | 36 | 0.03966064 | 1.5635388  | 0.11055768 | 4.3690868e-14 | 4.6853691e-45 | 0.043132673 |
| Q4V8K2 | Ctnnb1    | Beta-catenin-like protein 1                                   | 89.81   | 2.84  | 64948  | 2  | 0.03969234 | 1.48692809 | 0.11055768 | 6.2691573e-14 | 8.152482e-45  | 0.043132673 |
| Q8R1I1 | Uqcr10    | Cytochrome b-c1 complex subunit 9                             | 48.11   | 10.94 | 7446   | 1  | 0.03995045 | 1.78206292 | 0.11116817 | 8.9772294e-14 | 1.4167868e-44 | 0.043370848 |
| Q62426 | Cstb      | Cystatin-B                                                    | 245.11  | 66.33 | 11046  | 4  | 0.04003745 | 1.63253757 | 0.11130178 | 1.2828896e-13 | 2.4554326e-44 | 0.043422975 |
| Q62167 | Ddx3x     | ATP-dependent RNA helicase DDX3X                              | 1692.59 | 47.58 | 73101  | 27 | 0.0403282  | 1.25286044 | 0.11200097 | 1.8295706e-13 | 4.2487577e-44 | 0.043695755 |
| Q8BIJ7 | Rufy1     | RUN and FYVE domain-containing protein 1                      | 112.63  | 4.92  | 80376  | 2  | 0.04039772 | 1.7493018  | 0.1120408  | 2.6038809e-13 | 7.3303075e-44 | 0.043711291 |
| Q5EGY4 | Ykt6      | Synaptobrevin homolog YKT6                                    | 151.14  | 22.73 | 22369  | 3  | 0.04042102 | 2.02952281 | 0.1120408  | 3.698318e-13  | 1.2628385e-43 | 0.043711291 |
| Q91YJ2 | Snx4      | Sorting nexin-4                                               | 51.9    | 2     | 51778  | 1  | 0.0404853  | 2.01679753 | 0.11211013 | 5.2420083e-13 | 2.1730537e-43 | 0.043738341 |
| O54774 | Ap3d1     | AP-3 complex subunit delta-1                                  | 99.76   | 2.75  | 135081 | 2  | 0.04057704 | 1.98563121 | 0.11225529 | 7.41482e-13   | 3.7339888e-43 | 0.043794973 |
| Q810F4 | Fam3c     | Protein FAM3C                                                 | 125.28  | 11.01 | 24714  | 2  | 0.04084438 | 1.40936965 | 0.11288549 | 1.0466756e-12 | 6.4058683e-43 | 0.044040837 |
| P60898 | Polr2i    | DNA-directed RNA polymerase II subunit RPB9                   | 38.02   | 5.6   | 14523  | 1  | 0.04104141 | 0.34710532 | 0.11332033 | 1.4744543e-12 | 1.0959578e-42 | 0.044210486 |
| Q99K48 | Nono      | Non-POU domain-containing octamer-binding protein             | 1396.54 | 55.39 | 54541  | 25 | 0.04139219 | 0.75819945 | 0.11417845 | 2.0727998e-12 | 1.8707852e-42 | 0.044545271 |
| Q9ERG0 | Lima1     | LIM domain and actin-binding protein 1                        | 277.7   | 10.89 | 84060  | 6  | 0.04149077 | 1.56584397 | 0.11433992 | 2.9079663e-12 | 3.1830937e-42 | 0.044608265 |
| Q61464 | Znf638    | Zinc finger protein 638                                       | 65.49   | 0.66  | 218134 | 1  | 0.04169636 | 0.19232157 | 0.11472483 | 4.071238e-12  | 5.4071881e-42 | 0.044758432 |
| Q8R4R6 | Nup35     | Nucleoporin NUP35                                             | 284.53  | 29.54 | 34786  | 6  | 0.04171081 | 0.49001616 | 0.11472483 | 5.6881083e-12 | 9.1643114e-42 | 0.044758432 |
| D2XV59 | Gtppb1    | GTP-binding protein 1                                         | 230.46  | 10.01 | 72489  | 5  | 0.04183858 | 1.88486314 | 0.11496    | 7.9307196e-12 | 1.5515171e-41 | 0.044850183 |
| Q8BH60 | Gopc      | Golgi-associated PDZ and coiled-coil motif-containing protein | 36.83   | 1.94  | 50662  | 1  | 0.04187685 | 2.79915149 | 0.11496    | 1.1034682e-11 | 2.6220107e-41 | 0.044850183 |
| Q9CXW2 | Mrps22    | 28S ribosomal protein S22, mitochondrial                      | 119.39  | 5.57  | 41192  | 2  | 0.04226864 | 1.41285381 | 0.11592408 | 1.5321762e-11 | 4.4256378e-41 | 0.045226305 |
| Q3UQ84 | Tars2     | Threonine--tRNA ligase, mitochondrial                         | 96.72   | 2.63  | 81700  | 2  | 0.04232756 | 1.90073177 | 0.11597426 | 2.1230409e-11 | 7.4445111e-41 | 0.045245884 |
| Q9WU81 | Slc37a2   | Glucose-6-phosphate exchanger SLC37A2                         | 280.73  | 14.37 | 55073  | 5  | 0.04250166 | 1.38100869 | 0.11631486 | 2.9356747e-11 | 1.2505727e-40 | 0.045378764 |
| O35309 | Nmi       | N-myc-interactor                                              | 116.7   | 9.55  | 35236  | 2  | 0.04253335 | 1.70346164 | 0.11631486 | 4.0509468e-11 | 2.0964779e-40 | 0.045378764 |
| Q9Z0P5 | Twf2      | Twinfilin-2                                                   | 386.7   | 32.95 | 39471  | 7  | 0.04269537 | 1.64708903 | 0.11664621 | 5.5783189e-11 | 3.5104033e-40 | 0.045508036 |
| Q80V11 | Trim56    | E3 ubiquitin-protein ligase TRIM56                            | 48.54   | 2.72  | 79513  | 1  | 0.042827   | 2.94134275 | 0.11688231 | 7.6656229e-11 | 5.8663458e-40 | 0.045600145 |
| Q5U2Q7 | Etf1      | Eukaryotic peptide chain release factor subunit 1             | 304.23  | 22.43 | 49031  | 6  | 0.04286367 | 1.34441247 | 0.11688231 | 1.0512065e-10 | 9.7859751e-40 | 0.045600145 |



|        |          |                                                                                               |         |       |        |    |            |            |            |               |               |             |
|--------|----------|-----------------------------------------------------------------------------------------------|---------|-------|--------|----|------------|------------|------------|---------------|---------------|-------------|
| O89001 | Cpd      | Carboxypeptidase D                                                                            | 87.69   | 1.6   | 152406 | 2  | 0.0429091  | 1.81051446 | 0.11689453 | 1.4385475e-10 | 1.6304738e-39 | 0.045604916 |
| O08917 | Flot1    | Flotillin-1                                                                                   | 182.81  | 13.08 | 47513  | 4  | 0.04305257 | 1.61431943 | 0.11717359 | 1.9645141e-10 | 2.7131484e-39 | 0.045713785 |
| Q9WTX6 | Cul1     | Cullin-1                                                                                      | 158.66  | 8.51  | 89692  | 4  | 0.04313887 | 1.42736334 | 0.1171993  | 2.6771949e-10 | 4.5064123e-39 | 0.045723818 |
| Q9CQZ6 | Ndufb3   | NADH dehydrogenase [ubiquinone] 1 beta subcomplex subunit 3                                   | 41.01   | 10.58 | 11692  | 1  | 0.04315781 | 2.24488739 | 0.1171993  | 3.6408088e-10 | 7.4736758e-39 | 0.045723818 |
| P82343 | Renbp    | N-acylglucosamine 2-epimerase                                                                 | 125.93  | 11.4  | 49771  | 3  | 0.04318517 | 2.96801481 | 0.1171993  | 4.9409215e-10 | 1.2380997e-38 | 0.045723818 |
| Q80Y81 | Elac2    | Zinc phosphodiesterase ELAC protein 2                                                         | 257.12  | 11.07 | 92719  | 7  | 0.04372088 | 1.43106051 | 0.11854046 | 6.6912826e-10 | 2.048673e-38  | 0.046247055 |
| Q9EPU0 | Upf1     | Regulator of nonsense transcripts 1                                                           | 1036.76 | 19.4  | 123967 | 21 | 0.04376353 | 1.45405509 | 0.11854353 | 9.0427659e-10 | 3.3760086e-38 | 0.046248251 |
| Q9D706 | Rpap3    | RNA polymerase II-associated protein 3                                                        | 131.8   | 4.39  | 74096  | 2  | 0.04391325 | 2.20376233 | 0.11868588 | 1.219503e-09  | 5.5564398e-38 | 0.046303785 |
| Q8BTY2 | Slc4a7   | Sodium bicarbonate cotransporter 3                                                            | 137     | 3.87  | 116514 | 3  | 0.04391624 | 4.71258204 | 0.11868588 | 1.6411688e-09 | 9.1282002e-38 | 0.046303785 |
| Q9QXX4 | Slc25a13 | Calcium-binding mitochondrial carrier protein Aralar2                                         | 1066.73 | 39.5  | 74467  | 20 | 0.0439408  | 1.25555229 | 0.11868588 | 2.2040002e-09 | 1.4980781e-37 | 0.046303785 |
| Q64518 | Atp2a3   | Sarcoplasmic/endoplasmic reticulum calcium ATPase 3                                           | 533.94  | 8     | 113638 | 7  | 0.0440043  | 1.33028394 | 0.11874442 | 2.9536372e-09 | 2.4557827e-37 | 0.046326627 |
| Q8R4Y8 | Rtnn     | Rotatin                                                                                       | 42.11   | 0.31  | 248489 | 1  | 0.04408714 | 1.79529634 | 0.11874442 | 3.9499261e-09 | 4.0202657e-37 | 0.046326627 |
| Q99J36 | Thumpd1  | THUMP domain-containing protein 1                                                             | 161.73  | 10.86 | 38885  | 3  | 0.04408725 | 1.66389712 | 0.11874442 | 5.2711611e-09 | 6.5717562e-37 | 0.046326627 |
| Q9D7B6 | Acad8    | Isobutyryl-CoA dehydrogenase, mitochondrial                                                   | 94.39   | 6.54  | 45020  | 2  | 0.04415912 | 2.19051531 | 0.1188259  | 7.0195337e-09 | 1.0731799e-36 | 0.046358415 |
| Q922Q1 | Marc2    | Mitochondrial amidoxime reducing component 2                                                  | 395.54  | 36.09 | 38194  | 9  | 0.04424054 | 0.69197073 | 0.11893291 | 9.3281189e-09 | 1.750055e-36  | 0.046400164 |
| Q8R164 | Bphl     | Valacyclovir hydrolase                                                                        | 82.81   | 7.9   | 32851  | 2  | 0.0443709  | 2.18883308 | 0.11909434 | 1.2369806e-08 | 2.8496784e-36 | 0.046463143 |
| Q9Z219 | Sucla2   | Succinate--CoA ligase [ADP-forming] subunit beta, mitochondrial                               | 277.61  | 12.74 | 50114  | 6  | 0.04442315 | 1.37805426 | 0.11909434 | 1.6368691e-08 | 4.6321987e-36 | 0.046463143 |
| P55194 | Sh3bp1   | SH3 domain-binding protein 1                                                                  | 114.68  | 4.71  | 74172  | 2  | 0.04446756 | 1.84272858 | 0.11909434 | 2.161456e-08  | 7.5199527e-36 | 0.046463143 |
| P84228 | Hist1h3b | Histone H3.2                                                                                  | 804.84  | 61.76 | 15388  | 11 | 0.04447161 | 0.39996312 | 0.11909434 | 2.8481276e-08 | 1.2192648e-35 | 0.046463143 |
| P63036 | Dnaja1   | DnaJ homolog subfamily A member 1                                                             | 276.26  | 19.9  | 44868  | 6  | 0.04450916 | 1.81655888 | 0.11909434 | 3.745004e-08  | 1.9748402e-35 | 0.046463143 |
| P68372 | Tubb4b   | Tubulin beta-4B chain                                                                         | 2882.93 | 83.6  | 49831  | 44 | 0.04463704 | 1.56084533 | 0.11932467 | 4.9138753e-08 | 3.1947408e-35 | 0.046553004 |
| Q8BUM3 | Ptpn7    | Tyrosine-protein phosphatase non-receptor type 7                                              | 112.28  | 8.91  | 40351  | 2  | 0.0448619  | 2.68650473 | 0.1198136  | 6.4338984e-08 | 5.1593373e-35 | 0.046743751 |
| Q62885 | Unc119   | Protein unc-119 homolog A                                                                     | 107.48  | 9.17  | 27048  | 2  | 0.04498137 | 2.14743468 | 0.12002038 | 8.4062383e-08 | 8.3134225e-35 | 0.046824424 |
| P17182 | Eno1     | Alpha-enolase                                                                                 | 2960.96 | 79.26 | 47141  | 39 | 0.04508769 | 1.43658738 | 0.12019175 | 1.0959881e-07 | 1.3373499e-34 | 0.046891282 |
| O08560 | Dgkz     | Diacylglycerol kinase zeta                                                                    | 147.96  | 7.32  | 104009 | 4  | 0.04516644 | 1.77699884 | 0.12028935 | 1.4258896e-07 | 2.1479365e-34 | 0.04692936  |
| P26350 | Ptma     | Prothymosin alpha                                                                             | 549.84  | 36.04 | 12254  | 6  | 0.04522971 | 0.50516499 | 0.12034559 | 1.8511477e-07 | 3.4448795e-34 | 0.0469513   |
| Q80UU2 | Rpp38    | Ribonuclease P protein subunit p38                                                            | 42.67   | 3.57  | 31129  | 1  | 0.04530645 | 2.78405564 | 0.12037894 | 2.3981184e-07 | 5.5174553e-34 | 0.046964312 |
| Q9CR00 | Psmid9   | 26S proteasome non-ATPase regulatory subunit 9                                                | 49.21   | 5.41  | 24720  | 1  | 0.04532657 | 2.75849161 | 0.12037894 | 3.1000863e-07 | 8.8243888e-34 | 0.046964312 |
| Q9CWJ9 | Atic     | Bifunctional purine biosynthesis protein PURH                                                 | 2010.74 | 67.74 | 64217  | 32 | 0.04548552 | 1.50153227 | 0.1206888  | 3.9989854e-07 | 1.4097485e-33 | 0.047085201 |
| Q9ER88 | Dap3     | 28S ribosomal protein S29, mitochondrial                                                      | 255.45  | 13.3  | 44699  | 4  | 0.04578958 | 1.55736428 | 0.12138277 | 5.1475194e-07 | 2.2479739e-33 | 0.047355944 |
| Q9D2M8 | Ube2v2   | Ubiquitin-conjugating enzyme E2 variant 2                                                     | 408.32  | 41.38 | 16367  | 8  | 0.04619601 | 1.41152097 | 0.12234658 | 6.6117676e-07 | 3.5752549e-33 | 0.047731964 |
| Q6P6S4 | Sil1     | Nucleotide exchange factor SIL1                                                               | 49.28   | 1.72  | 52350  | 1  | 0.046246   | 2.565896   | 0.12236546 | 8.4743787e-07 | 5.6684939e-33 | 0.047739327 |
| O54988 | Slk      | STE20-like serine/threonine-protein kinase                                                    | 481.02  | 11.03 | 141457 | 9  | 0.04645911 | 1.50117884 | 0.12275277 | 1.0838474e-06 | 8.9759075e-33 | 0.047890431 |
| P27661 | H2afx    | Histone H2AX                                                                                  | 530.51  | 52.45 | 15143  | 7  | 0.04647837 | 0.24446847 | 0.12275277 | 1.3832405e-06 | 1.4183281e-32 | 0.047890431 |
| Q61210 | Arhgef1  | Rho guanine nucleotide exchange factor 1                                                      | 523.33  | 12.83 | 102805 | 9  | 0.04669278 | 1.27927069 | 0.12320506 | 1.7615536e-06 | 2.238691e-32  | 0.048066889 |
| Q9Z0H3 | Smarcb1  | SWI/SNF-related matrix-associated actin-dependent regulator of chromatin subfamily B member 1 | 145.36  | 7.79  | 44141  | 2  | 0.04680762 | 0.61691396 | 0.12339404 | 2.238525e-06  | 3.5261501e-32 | 0.048140617 |
| P14841 | Cst3     | Cystatin-C                                                                                    | 118.42  | 17.14 | 15437  | 2  | 0.04685911 | 2.23368107 | 0.12341584 | 2.8385417e-06 | 5.5452088e-32 | 0.048149121 |
| Q78PB6 | Ndel1    | Nuclear distribution protein nudE-like 1                                                      | 55.16   | 3.48  | 38366  | 1  | 0.0470808  | 2.22967039 | 0.12376821 | 3.5916599e-06 | 8.7093185e-32 | 0.048286592 |
| P35922 | Fmr1     | Synaptic functional regulator FMR1                                                            | 186.6   | 6.03  | 68989  | 3  | 0.04709514 | 1.34285042 | 0.12376821 | 4.5348307e-06 | 1.3649951e-31 | 0.048286592 |
| Q18PI6 | Cd84     | SLAM family member 5                                                                          | 48.89   | 3.34  | 37378  | 1  | 0.04717218 | 2.23764112 | 0.12376821 | 5.7133688e-06 | 2.1370197e-31 | 0.048286592 |
| Q8BP27 | Sfr1     | Swi5-dependent recombination DNA repair protein 1 homolog                                     | 39.05   | 3.76  | 35183  | 1  | 0.04720824 | 2.28584286 | 0.12376821 | 7.1827066e-06 | 3.3410328e-31 | 0.048286592 |
| P14106 | C1qb     | Complement C1q subcomponent subunit B                                                         | 220.41  | 16.6  | 26717  | 4  | 0.04720966 | 0.65262134 | 0.12376821 | 9.0104832e-06 | 5.2171751e-31 | 0.048286592 |

|        |         |                                                             |         |       |        |    |            |            |            |               |               |             |
|--------|---------|-------------------------------------------------------------|---------|-------|--------|----|------------|------------|------------|---------------|---------------|-------------|
| Q3TIU4 | Pde12   | 2',5'-phosphodiesterase 12                                  | 76.18   | 4.11  | 67514  | 2  | 0.04727068 | 2.04270056 | 0.12381448 | 1.1279024e-05 | 8.1385232e-31 | 0.048304643 |
| Q8BG51 | Rhot1   | Mitochondrial Rho GTPase 1                                  | 172.8   | 5.71  | 72242  | 4  | 0.04731649 | 0.75475694 | 0.12382088 | 1.4088276e-05 | 1.267895e-30  | 0.04830714  |
| A2VCX1 | Tipr1   | TIP41-like protein                                          | 102.7   | 10.7  | 31225  | 3  | 0.04760986 | 1.97258522 | 0.12447449 | 1.7559274e-05 | 1.972788e-30  | 0.04856214  |
| F1M775 | Diaph1  | Protein diaphanous homolog 1                                | 115.93  | 2.69  | 140409 | 2  | 0.047943   | 2.20412846 | 0.12523081 | 2.1838209e-05 | 3.0620742e-30 | 0.048857207 |
| Q4AE70 | Carm1   | Histone-arginine methyltransferase CARM1                    | 184.16  | 9.06  | 70341  | 3  | 0.04813648 | 2.16180176 | 0.12562124 | 2.7101214e-05 | 4.7403846e-30 | 0.04900953  |
| P0C0S6 | H2afz   | Histone H2A.Z                                               | 523.12  | 56.25 | 13553  | 8  | 0.04821317 | 0.23534126 | 0.12570649 | 3.3559943e-05 | 7.324376e-30  | 0.049042788 |
| D3ZU57 | Riox1   | Ribosomal oxygenase 1                                       | 36.43   | 2.01  | 67455  | 1  | 0.0483792  | 0.16287133 | 0.1259868  | 4.1468079e-05 | 1.1301339e-29 | 0.049152148 |
| Q0P678 | Zc3h18  | Zinc finger CCCH domain-containing protein 18               | 36.96   | 2.64  | 105694 | 1  | 0.04840894 | 0.08796529 | 0.1259868  | 5.1128892e-05 | 1.7406391e-29 | 0.049152148 |
| P26043 | Rdx     | Radixin                                                     | 1456.89 | 34.82 | 68543  | 26 | 0.04860993 | 1.48873192 | 0.12639466 | 6.2903982e-05 | 2.6778532e-29 | 0.04931127  |
| Q2L4X1 | Bzw2    | Basic leucine zipper and W2 domain-containing protein 2     | 136.41  | 8.83  | 48063  | 3  | 0.04870979 | 1.38972401 | 0.12653908 | 7.7223371e-05 | 4.1116484e-29 | 0.049367611 |
| P05213 | Tuba1b  | Tubulin alpha-1B chain                                      | 2653.02 | 78.71 | 50152  | 39 | 0.04889328 | 1.50004837 | 0.1269003  | 9.4597094e-05 | 6.303812e-29  | 0.049508537 |
| P26040 | Ezr     | Ezrin                                                       | 1063.09 | 20.48 | 69407  | 17 | 0.0491082  | 1.47419035 | 0.12707307 | 0.00011562849 | 9.646765e-29  | 0.04957594  |
| Q6PA06 | Atl2    | Atlastin-2                                                  | 214.69  | 10.29 | 66224  | 5  | 0.04911771 | 3.50298446 | 0.12707307 | 0.00014102938 | 1.4733017e-28 | 0.04957594  |
| Q9CSU0 | Rprd1b  | Regulation of nuclear pre-mRNA domain-containing protein 1B | 189.71  | 16.56 | 36884  | 4  | 0.04913131 | 1.73028017 | 0.12707307 | 0.00017163728 | 2.2477254e-28 | 0.04957594  |
| Q04447 | Ckb     | Creatine kinase B-type                                      | 1790.38 | 66.4  | 42713  | 25 | 0.0491478  | 1.47892056 | 0.12707307 | 0.00020843499 | 3.4255244e-28 | 0.04957594  |
| Q91VM9 | Ppa2    | Inorganic pyrophosphatase 2, mitochondrial                  | 78.7    | 8.18  | 38115  | 2  | 0.04918984 | 1.76498144 | 0.12707307 | 0.00025257263 | 5.2147826e-28 | 0.04957594  |
| O70133 | Dhx9    | ATP-dependent RNA helicase A                                | 2133.99 | 27.17 | 149475 | 37 | 0.0492269  | 0.71232173 | 0.12707307 | 0.00030539248 | 7.9290179e-28 | 0.04957594  |
| P18242 | Ctsd    | Cathepsin D                                                 | 1911.02 | 69.27 | 44954  | 30 | 0.04931034 | 1.87718289 | 0.12710109 | 0.00036845675 | 1.2041642e-27 | 0.049586872 |
| P24527 | Lta4h   | Leukotriene A-4 hydrolase                                   | 376.51  | 15.06 | 69051  | 7  | 0.0493268  | 1.95638808 | 0.12710109 | 0.00044357864 | 1.8261816e-27 | 0.049586872 |
| P11440 | Cdk1    | Cyclin-dependent kinase 1                                   | 541.72  | 49.49 | 34107  | 12 | 0.04942752 | 1.76354296 | 0.12724578 | 0.00053285672 | 2.7664595e-27 | 0.049643323 |
| O88685 | Psmc3   | 26S proteasome regulatory subunit 6A                        | 957.78  | 43.89 | 49549  | 17 | 0.04965019 | 1.22943331 | 0.12770388 | 0.00063871312 | 4.1846836e-27 | 0.049822043 |
| Q6A065 | Cep170  | Centrosomal protein of 170 kDa                              | 124.31  | 1.57  | 175050 | 3  | 0.04973787 | 1.78590461 | 0.12781424 | 0.00076393544 | 6.3172077e-27 | 0.049865102 |
| P49186 | Mapk9   | Mitogen-activated protein kinase 9                          | 110.91  | 4.96  | 48017  | 2  | 0.04993052 | 2.68130885 | 0.12809803 | 0.00091172281 | 9.5229917e-27 | 0.049975819 |
| Q9D2L9 | Fam111a | Protein FAM111A                                             | 73      | 2.12  | 69949  | 1  | 0.04993804 | 0.84097345 | 0.12809803 | 0.0010857361  | 1.4328747e-26 | 0.049975819 |
