# Supplementary material for: Does size matter? A proteomics-informed comparison of the effects of polystyrene beads of different sizes on macrophages
Source: Royal Society of Chemistry journal article supplement (doi:10.1039/d2en00214k), 2022-01-01
Supplement: d2en00214k12.pdf [file d2en00214k12.pdf]

Supplementary Table 5: list of proteins which abundance is significantly modified in response to cell exposure to polystyrene particles of all sizes

| acc number | gene_name | description                                        | protein_set_score | coverage | MW     | #peptides | T test 10 μm | ratio 10μm/ctrl | T test 1 μm | Ratio 1 μm/ctrl | T test 0.1 μm | Ratio 0.1 μm/ctrl |
|------------|-----------|----------------------------------------------------|-------------------|----------|--------|-----------|--------------|-----------------|-------------|-----------------|---------------|-------------------|
| Q8VDJ3     | Hdlbp     | Vigilin                                            | 1815.6            | 30.21    | 141743 | 31        | 5.4272E-05   | 1.51763907      | 1.5877E-05  | 1.55190654      | 5.1354E-05    | 1.51485346        |
| Q91VR5     | Ddx1      | ATP-dependent RNA helicase DDX1                    | 905.19            | 31.76    | 82500  | 16        | 9.4088E-05   | 2.04795075      | 9.1546E-05  | 1.8950926       | 0.00014368    | 1.82286485        |
| Q6NZJ6     | Eif4g1    | Eukaryotic translation initiation factor 4 gamma 1 | 1620.48           | 22.81    | 176077 | 29        | 0.00011251   | 1.81216439      | 9.132E-05   | 1.81331346      | 0.00015127    | 1.7489996         |
| Q8BTM8     | Flna      | Filamin-A                                          | 4874.93           | 41.48    | 281222 | 76        | 3.525E-06    | 3.33355131      | 1.9165E-05  | 1.97347942      | 0.00015826    | 1.71914586        |
| P56399     | Usp5      | Ubiquitin carboxyl-terminal hydrolase 5            | 1049.75           | 30.42    | 95833  | 19        | 0.00019166   | 1.6269215       | 1.2742E-05  | 1.70188276      | 0.00013156    | 1.37677555        |
| Q9QXS1     | Plec      | Plectin                                            | 7877.069          | 38.39    | 534188 | 147       | 2.617E-06    | 2.18292978      | 6.4825E-05  | 1.56663553      | 0.00023562    | 1.41806406        |
| Q71LX4     | Tln2      | Talin-2                                            | 594.96            | 3.75     | 253621 | 10        | 0.00017292   | 1.89105696      | 3.9602E-05  | 1.79939452      | 0.00024868    | 1.58818862        |
| P26039     | Tln1      | Talin-1                                            | 6208.992          | 49.82    | 269821 | 91        | 8.5926E-05   | 1.73523073      | 0.00019566  | 1.65167869      | 0.00026858    | 1.5022875         |
| Q9EQP2     | Ehd4      | EH domain-containing protein 4                     | 849.75            | 35.86    | 61481  | 17        | 1.7686E-05   | 2.61603399      | 0.00011797  | 2.09590951      | 0.00028082    | 1.9124411         |
| F1LMZ8     | Psmd11    | 26S proteasome non-ATPase regulatory subunit 11    | 740.08            | 34.36    | 47464  | 14        | 0.00030949   | 1.76065757      | 5.5729E-05  | 1.96156574      | 0.00018652    | 1.81118113        |
| B2RQC6     | Cad       | CAD protein                                        | 1068.65           | 13.98    | 243238 | 23        | 8.183E-05    | 1.93870205      | 5.5793E-05  | 1.95505877      | 0.00032585    | 1.84121212        |
| Q641Z6     | Ehd1      | EH domain-containing protein 1                     | 685.35            | 33.52    | 60603  | 13        | 0.00033326   | 2.92385195      | 0.00045043  | 1.9894657       | 0.00048001    | 2.00130708        |
| Q9WU78     | Pded6ip   | Programmed cell death 6-interacting protein        | 1129.38           | 31.07    | 96024  | 17        | 0.00049183   | 1.77795819      | 8.0088E-07  | 1.61100723      | 0.00045116    | 1.49310062        |
| Q8BPU7     | Elmo1     | Engulfment and cell motility protein 1             | 219.22            | 11.69    | 83936  | 6         | 4.5421E-05   | 4.46903257      | 0.00049949  | 3.49749669      | 0.00025563    | 3.29460797        |
| Q8R491     | Ehd3      | EH domain-containing protein 3                     | 345.1             | 13.08    | 60791  | 7         | 0.0002678    | 3.0120143       | 3.7739E-05  | 2.20563171      | 0.00058548    | 2.15353161        |
| Q6P542     | Abcf1     | ATP-binding cassette sub-family F member 1         | 418.04            | 13.62    | 94945  | 8         | 0.00065387   | 1.71896806      | 0.00015925  | 1.77599128      | 0.00041499    | 1.66613795        |
| P54822     | Adsl      | Adenylosuccinate lyase                             | 755.65            | 37.4     | 54866  | 12        | 0.00081981   | 1.95364977      | 0.00054216  | 1.92710433      | 0.00074764    | 1.85185156        |
| Q8JZK9     | Hmgcs1    | Hydroxymethylglutaryl-CoA synthase, cytoplasmic    | 388.81            | 21.54    | 57569  | 7         | 0.00091295   | 2.9756654       | 0.0003623   | 3.08209764      | 0.00070865    | 3.02703079        |
| Q5PPK9     | Eipr1     | EARP and GARP complex-interacting protein 1        | 38.64             | 3.37     | 43157  | 1         | 0.00101954   | 21.816255       | 4.5395E-05  | 24.4642068      | 0.00017467    | 19.5133428        |
| P62334     | Psmc6     | 26S proteasome regulatory subunit 10B              | 593.05            | 30.85    | 44173  | 10        | 0.00125483   | 1.93117247      | 0.00021547  | 2.31903171      | 0.00016282    | 2.24131066        |
| P46471     | Psmc2     | 26S proteasome regulatory subunit 7                | 958.45            | 38.11    | 48648  | 16        | 0.00025416   | 1.51080579      | 0.00045676  | 1.59143158      | 0.00128873    | 1.43052571        |
| Q04899     | Cdk18     | Cyclin-dependent kinase 18                         | 160.51            | 8.87     | 51848  | 3         | 0.00085551   | 3.45216177      | 0.00117006  | 2.7094041       | 0.00146011    | 2.70448203        |
| P83953     | Kpna1     | Importin subunit alpha-5                           | 184.16            | 7.99     | 60137  | 3         | 0.0009681    | 2.76113935      | 0.00109101  | 2.65644094      | 0.00146883    | 2.59479905        |
| Q9JMA1     | Usp14     | Ubiquitin carboxyl-terminal hydrolase 14           | 1176.23           | 50.71    | 56002  | 20        | 0.00033238   | 2.14326826      | 0.00016632  | 2.13344111      | 0.00155215    | 1.78458344        |
| P70168     | Kpnb1     | Importin subunit beta-1                            | 895.81            | 21.92    | 97184  | 16        | 0.00163427   | 1.57888795      | 0.00038455  | 1.38496811      | 0.0013189     | 1.38194514        |
| Q2PQA9     | Kif5b     | Kinesin-1 heavy chain                              | 638.44            | 14.43    | 109531 | 10        | 0.00033976   | 2.60312509      | 0.00040319  | 2.43308373      | 0.00163541    | 2.08189484        |
| Q99LC8     | Eif2b1    | Translation initiation factor eIF-2B subunit alpha | 98.49             | 5.57     | 33816  | 1         | 0.00067676   | 4.59845736      | 0.00172047  | 4.46872015      | 0.00074616    | 3.93764624        |
| Q9QXB9     | Drg2      | Developmentally-regulated GTP-binding protein 2    | 211.09            | 12.09    | 40718  | 4         | 0.00065295   | 2.28961486      | 0.00160585  | 2.21668872      | 0.0017335     | 2.0417797         |
| Q61510     | Trim25    | E3 ubiquitin/ISG15 ligase TRIM25                   | 236.25            | 8.68     | 71726  | 4         | 0.00174995   | 3.05808393      | 0.00028734  | 2.75031349      | 0.00050988    | 2.53286651        |
| P28658     | Atxn10    | Ataxin-10                                          | 477.58            | 22.11    | 53707  | 8         | 0.00044372   | 3.58671612      | 0.00128162  | 2.54799791      | 0.00175152    | 2.46984647        |
| Q8BJY1     | Psmd5     | 26S proteasome non-ATPase regulatory subunit 5     | 296.7             | 19.64    | 55972  | 7         | 0.0018005    | 3.19524591      | 0.00014158  | 2.84498042      | 0.00112156    | 2.60006467        |
| Q8BL66     | Eea1      | Early endosome antigen 1                           | 586.06            | 10.84    | 160915 | 12        | 5.7191E-05   | 2.21606615      | 0.00040729  | 1.82991378      | 0.00181134    | 1.63757327        |

|        |          |                                                                            |         |       |        |    |            |            |            |            |            |            |
|--------|----------|----------------------------------------------------------------------------|---------|-------|--------|----|------------|------------|------------|------------|------------|------------|
| Q61749 | Eif2b4   | Translation initiation factor eIF-2B subunit delta                         | 211.27  | 9.92  | 57624  | 4  | 0.00183948 | 2.18878752 | 0.00032428 | 2.92507375 | 0.00066446 | 2.45929069 |
| Q99JX4 | Eif3m    | Eukaryotic translation initiation factor 3 subunit M                       | 513.85  | 28.61 | 42517  | 7  | 0.00186623 | 2.05054997 | 0.00150356 | 2.15231009 | 0.00046471 | 2.29424204 |
| Q61879 | Myh10    | Myosin-10                                                                  | 1022.24 | 10.12 | 228996 | 19 | 0.00190762 | 1.97697627 | 0.00059234 | 1.61552388 | 0.00083013 | 1.52267486 |
| Q69ZK0 | Prex1    | Phosphatidylinositol 3,4,5-trisphosphate-dependent Rac exchanger 1 protein | 571.72  | 11.03 | 184935 | 13 | 0.00022379 | 2.74857743 | 0.00035493 | 2.49278647 | 0.00191977 | 2.12302307 |
| P47856 | Gfpt1    | Glutamine--fructose-6-phosphate aminotransferase [isomerizing] 1           | 162.85  | 5.02  | 78539  | 3  | 0.00106375 | 4.29294658 | 0.00178357 | 3.8759221  | 0.00192644 | 3.92532224 |
| P17426 | Ap2a1    | AP-2 complex subunit alpha-1                                               | 767.87  | 23.64 | 107664 | 16 | 0.0003118  | 2.09400527 | 0.00048271 | 1.73992127 | 0.00196506 | 1.64847173 |
| Q8VIJ5 | Oga      | Protein O-GlcNAcase                                                        | 77.43   | 2.18  | 102918 | 2  | 0.00204886 | 3.22469373 | 0.00101938 | 2.81887564 | 0.0013635  | 2.77256998 |
| Q8BML9 | Qars     | Glutamine--tRNA ligase                                                     | 806.47  | 29.68 | 87677  | 18 | 0.00053185 | 2.09690338 | 0.00036798 | 1.68521947 | 0.00205869 | 1.57706646 |
| Q8K1B8 | Fermt3   | Fermitin family homolog 3                                                  | 1259.78 | 48.27 | 75635  | 23 | 0.00092504 | 1.58681723 | 0.00100907 | 1.58073608 | 0.00217985 | 1.4850281  |
| Q9Z1Q9 | Vars     | Valine--tRNA ligase                                                        | 2117.74 | 37.53 | 140215 | 37 | 0.00090304 | 1.76970927 | 0.00023223 | 1.91381929 | 0.00224167 | 1.63308994 |
| P62320 | Snrpd3   | Small nuclear ribonucleoprotein Sm D3                                      | 385.4   | 54.76 | 13916  | 7  | 9.4566E-05 | 0.53433226 | 0.00228654 | 0.72532518 | 0.00119248 | 0.70907356 |
| P56477 | Irf5     | Interferon regulatory factor 5                                             | 205.02  | 14.08 | 56005  | 4  | 0.00229471 | 2.77927689 | 0.00071357 | 3.23915843 | 0.00193772 | 2.77869027 |
| Q61584 | Fxr1     | Fragile X mental retardation syndrome-related protein 1                    | 818.29  | 27.33 | 76222  | 14 | 0.00230117 | 1.38568437 | 0.00160419 | 1.35856376 | 0.00216319 | 1.34180864 |
| Q9JKF1 | Iqgap1   | Ras GTPase-activating-like protein IQGAP1                                  | 4641.94 | 51.84 | 188742 | 74 | 0.00232999 | 2.15837632 | 3.2205E-06 | 1.7360297  | 0.0014195  | 1.42872067 |
| Q9CZD3 | Gars     | Glycine--tRNA ligase                                                       | 1137.19 | 32.92 | 81878  | 21 | 0.00012623 | 2.10603807 | 0.00013296 | 2.07370076 | 0.00235426 | 1.7668363  |
| Q8BGQ7 | Aars     | Alanine--tRNA ligase, cytoplasmic                                          | 1526.94 | 40.19 | 106909 | 26 | 0.00068751 | 1.99182707 | 0.0008503  | 1.88856684 | 0.00241573 | 1.73975233 |
| Q924T2 | Mrps2    | 28S ribosomal protein S2, mitochondrial                                    | 262.11  | 27.49 | 32313  | 5  | 0.00242046 | 1.74772484 | 0.00236873 | 1.7332089  | 0.00054984 | 1.95207922 |
| Q8BMJ2 | Lars     | Leucine--tRNA ligase, cytoplasmic                                          | 1136.64 | 23.6  | 134192 | 22 | 0.00017002 | 2.31277818 | 0.00119685 | 2.12189156 | 0.00246804 | 1.87804313 |
| B0BN93 | Psmd13   | 26S proteasome non-ATPase regulatory subunit 13                            | 355.53  | 21.01 | 42817  | 8  | 0.00256655 | 3.15510916 | 0.00054823 | 3.0741462  | 0.00241574 | 2.56015965 |
| Q6P5F9 | Xpo1     | Exportin-1                                                                 | 608.3   | 12.23 | 123093 | 10 | 2.1428E-05 | 2.73045932 | 0.0003203  | 1.85073594 | 0.00286693 | 1.71160778 |
| P50399 | Gdi2     | Rab GDP dissociation inhibitor beta                                        | 1995.58 | 69.89 | 50537  | 34 | 0.00024548 | 2.33538928 | 0.00120705 | 2.03459303 | 0.00305523 | 1.80502401 |
| P83940 | Eloc     | Elongin-C                                                                  | 257.95  | 37.5  | 12473  | 3  | 0.00277421 | 2.49937825 | 0.00311842 | 2.26777041 | 0.00269042 | 2.28927281 |
| P19096 | Fasn     | Fatty acid synthase                                                        | 3753.07 | 37.9  | 272428 | 67 | 0.00312902 | 1.65457583 | 0.00033215 | 1.95658651 | 0.00250859 | 1.66902713 |
| Q3TW96 | Uap111   | UDP-N-acetylhexosamine pyrophosphorylase-like protein 1                    | 706.45  | 30.37 | 56614  | 12 | 8.1721E-05 | 2.75115883 | 0.00118807 | 2.26128441 | 0.00327931 | 1.90977875 |
| A2AAY5 | Sh3pxd2b | SH3 and PX domain-containing protein 2B                                    | 186.02  | 4.74  | 101517 | 5  | 0.00079854 | 2.213445   | 0.00309029 | 1.99192903 | 0.00330858 | 1.98607935 |
| Q5XI32 | Capzb    | F-actin-capping protein subunit beta                                       | 1198.29 | 56.62 | 30629  | 19 | 0.00015666 | 1.88935219 | 0.00133562 | 1.59108973 | 0.00331679 | 1.49882033 |
| Q03963 | Eif2ak2  | Interferon-induced, double-stranded RNA-activated protein kinase           | 382.11  | 19.81 | 58280  | 6  | 0.00054222 | 1.97793363 | 0.00339122 | 1.88113268 | 0.00027557 | 1.85253818 |
| Q99KC8 | Vwa5a    | von Willebrand factor A domain-containing protein 5A                       | 1687.11 | 45.4  | 87143  | 28 | 2.5264E-06 | 2.29677407 | 0.00037269 | 1.68486842 | 0.00348216 | 1.3875143  |
| P45377 | Akr1b8   | Aldose reductase-related protein 2                                         | 863.46  | 55.7  | 36121  | 15 | 0.00067304 | 1.81505391 | 0.0005125  | 1.52763578 | 0.00353853 | 1.39648254 |
| P27546 | Map4     | Microtubule-associated protein 4                                           | 602.92  | 22.04 | 117429 | 15 | 0.00018291 | 1.89489099 | 0.00049979 | 1.73199516 | 0.00367401 | 1.48560377 |
| Q3UZ39 | Lrrfp1   | Leucine-rich repeat flightless-interacting protein 1                       | 647.42  | 24.69 | 79249  | 12 | 0.00032774 | 1.95232696 | 0.00056818 | 1.71517977 | 0.00371449 | 1.56005862 |
| P23591 | Tsta3    | GDP-L-fucose synthase                                                      | 206.47  | 14.02 | 35878  | 4  | 0.00176699 | 3.82543624 | 0.00049312 | 4.19257283 | 0.00389952 | 3.07063178 |

|        |          |                                                   |          |       |        |     |            |            |            |            |            |            |
|--------|----------|---------------------------------------------------|----------|-------|--------|-----|------------|------------|------------|------------|------------|------------|
| P62994 | Grb2     | Growth factor receptor-bound protein 2            | 92.77    | 11.06 | 25206  | 2   | 0.0012012  | 3.58477589 | 0.00209738 | 3.29032498 | 0.00396486 | 3.07123516 |
| Q93092 | Taldo1   | Transaldolase                                     | 1283.64  | 52.82 | 37387  | 25  | 0.00064701 | 1.91553394 | 0.0012433  | 1.77997271 | 0.00398066 | 1.64866512 |
| Q4V8K5 | Brox     | BRO1 domain-containing protein BROX               | 163.76   | 9.25  | 46192  | 3   | 0.00075232 | 4.95902496 | 0.00115663 | 4.43698052 | 0.00402968 | 3.7161332  |
| Q8BYW1 | Arhgap25 | Rho GTPase-activating protein 25                  | 332.92   | 13.12 | 73383  | 6   | 0.00015009 | 3.38556248 | 0.00232506 | 2.40225259 | 0.00404223 | 2.2583083  |
| Q8CGF7 | Tcerg1   | Transcription elongation regulator 1              | 350.65   | 7.18  | 123788 | 7   | 0.00404304 | 1.61583704 | 0.00031221 | 1.93553296 | 0.00087383 | 1.7968175  |
| Q9CPU0 | Glo1     | Lactoylglutathione lyase                          | 326.04   | 51.63 | 20810  | 7   | 0.00328572 | 3.023915   | 0.00106654 | 3.18301956 | 0.00411012 | 2.69448017 |
| P62192 | Psmc1    | 26S proteasome regulatory subunit 4               | 390.91   | 17.05 | 49185  | 7   | 0.00417704 | 1.63303775 | 2.1103E-05 | 1.73080218 | 0.00016266 | 1.58184622 |
| Q9JHU4 | Dync1h1  | Cytoplasmic dynein 1 heavy chain 1                | 4449.2   | 23.32 | 532045 | 86  | 3.5097E-05 | 2.45980167 | 0.00152956 | 1.71181735 | 0.0041993  | 1.54145205 |
| P42932 | Cct8     | T-complex protein 1 subunit theta                 | 1788.49  | 55.11 | 59555  | 33  | 0.00229178 | 1.90998455 | 0.0016259  | 1.91387328 | 0.00426939 | 1.75421682 |
| Q5BJY6 | Amdhd2   | N-acetylglucosamine-6-phosphate deacetylase       | 148.98   | 8.31  | 43539  | 3   | 0.00432008 | 3.01615931 | 4.7918E-05 | 2.24541275 | 0.00083324 | 1.71960979 |
| A2AIV8 | Card9    | Caspase recruitment domain-containing protein 9   | 50.62    | 1.87  | 62462  | 1   | 0.00137941 | 6.82213758 | 0.00011003 | 7.03379854 | 0.00436375 | 4.91252175 |
| A0MZ67 | Shtn1    | Shootin-1                                         | 202.58   | 8.06  | 71446  | 4   | 0.0043911  | 2.64304411 | 0.00224881 | 2.37673604 | 0.00011686 | 2.54393141 |
| O88746 | Tom1     | Target of Myb protein 1                           | 302.76   | 17.68 | 54325  | 6   | 0.00144472 | 2.34616447 | 0.00070974 | 2.0229722  | 0.00440379 | 1.73150421 |
| P54823 | Ddx6     | Probable ATP-dependent RNA helicase DDX6          | 665.64   | 33.54 | 54192  | 11  | 0.0044389  | 1.58797437 | 0.00109397 | 1.81798438 | 0.00167014 | 1.76357527 |
| A2ADY9 | Ddi2     | Protein DDI1 homolog 2                            | 353.19   | 24.56 | 44591  | 6   | 0.00064378 | 2.90977371 | 0.00174024 | 2.78346621 | 0.00455374 | 2.29356093 |
| Q8VDD5 | Myh9     | Myosin-9                                          | 7869.631 | 52.91 | 226372 | 116 | 8.1524E-05 | 2.01893545 | 0.00229116 | 1.50193745 | 0.0046121  | 1.44463364 |
| Q3TXS7 | Psmd1    | 26S proteasome non-ATPase regulatory subunit 1    | 1354.49  | 33.05 | 105730 | 23  | 0.00376801 | 1.73886725 | 0.00130772 | 1.58512923 | 0.00469633 | 1.4803025  |
| Q60854 | Serpnb6  | Serpin B6                                         | 986.41   | 53.17 | 42599  | 15  | 0.00046006 | 2.60329287 | 0.00097269 | 1.94466546 | 0.00480689 | 1.66067532 |
| Q04207 | Rela     | Transcription factor p65                          | 44.41    | 2.55  | 60212  | 1   | 0.00480968 | 1.58669207 | 0.00121559 | 1.76215981 | 0.00164795 | 1.75522013 |
| P22682 | Cbl      | E3 ubiquitin-protein ligase CBL                   | 75.93    | 1.64  | 100564 | 1   | 0.00305757 | 4.54954673 | 0.00485069 | 4.40474508 | 0.00438174 | 4.06147957 |
| P97386 | Lig3     | DNA ligase 3                                      | 45.7     | 0.99  | 113072 | 1   | 0.00487882 | 3.57568585 | 0.0004214  | 4.8856587  | 0.00198937 | 4.04498563 |
| P62259 | Ywhae    | 14-3-3 protein epsilon                            | 1078.54  | 63.92 | 29174  | 19  | 0.00269558 | 2.51365826 | 0.00064385 | 2.28970962 | 0.00495583 | 2.01023808 |
| Q99JI4 | Psmd6    | 26S proteasome non-ATPase regulatory subunit 6    | 490.5    | 28.79 | 45536  | 10  | 0.00081689 | 2.05218475 | 0.00503149 | 1.69713983 | 0.00501668 | 1.72403538 |
| Q8CFI2 | Cdc34    | Ubiquitin-conjugating enzyme E2 R1                | 34.63    | 2.98  | 26622  | 1   | 0.00504259 | 4.57327043 | 0.00030189 | 5.87799363 | 0.00075013 | 4.76492677 |
| P17918 | Pcna     | Proliferating cell nuclear antigen                | 1734.93  | 66.67 | 28785  | 22  | 0.00187895 | 1.56623597 | 0.00102015 | 1.61776563 | 0.00505533 | 1.45589699 |
| P46664 | Adss     | Adenylosuccinate synthetase isozyme 2             | 769.26   | 35.31 | 50021  | 13  | 0.00097788 | 2.10418493 | 0.00287878 | 1.97666263 | 0.00507379 | 1.78960805 |
| Q9Z0M5 | Lipa     | Lysosomal acid lipase/cholesteryl ester hydrolase | 105.58   | 4.79  | 45325  | 2   | 0.00193371 | 3.26295786 | 0.00509672 | 2.78353788 | 0.00014956 | 4.73128372 |
| O70200 | Aif1     | Allograft inflammatory factor 1                   | 147.18   | 11.56 | 16911  | 1   | 0.00514571 | 5.05678647 | 0.00136723 | 5.26429513 | 0.00515949 | 3.95351866 |
| Q91W50 | Csde1    | Cold shock domain-containing protein E1           | 1036.8   | 29.82 | 88791  | 18  | 0.00518433 | 1.39682819 | 0.0014012  | 1.50265867 | 0.00165552 | 1.48816476 |
| Q9D8T2 | Gsdmcd1  | Gasdermin-D                                       | 125.87   | 7.19  | 53238  | 3   | 0.00015122 | 2.43426786 | 0.00013879 | 2.2915925  | 0.00520998 | 1.75083179 |
| Q9JLQ0 | Cd2ap    | CD2-associated protein                            | 193.96   | 7.22  | 70450  | 4   | 0.0036657  | 1.91550108 | 0.00091011 | 2.11364916 | 0.00522584 | 1.69891194 |
| P17427 | Ap2a2    | AP-2 complex subunit alpha-2                      | 568.12   | 15.46 | 104017 | 11  | 0.0008633  | 2.23079091 | 0.00403846 | 1.89486185 | 0.00525344 | 1.89721472 |
| P46467 | Vps4b    | Vacuolar protein sorting-associated protein 4B    | 376.17   | 22.07 | 49419  | 7   | 0.00341729 | 1.86039094 | 0.00307885 | 1.86326425 | 0.00530705 | 1.78394809 |
| P61290 | Psme3    | Proteasome activator complex subunit 3            | 520.16   | 29.13 | 29506  | 9   | 0.00551922 | 2.2569562  | 0.00235171 | 2.48131469 | 0.00337223 | 2.39451711 |
| Q9JHJ0 | Tmod3    | Tropomodulin-3                                    | 319.1    | 29.26 | 39503  | 7   | 0.00557005 | 1.91867527 | 0.00169139 | 2.13759023 | 0.00491448 | 1.93242751 |
| P10711 | Tcea1    | Transcription elongation factor A protein 1       | 529.83   | 39.87 | 33880  | 9   | 0.00557099 | 2.10257811 | 0.00543404 | 2.29045707 | 0.00423073 | 2.12513397 |

|        |         |                                                                        |         |       |        |    |            |            |            |            |            |            |
|--------|---------|------------------------------------------------------------------------|---------|-------|--------|----|------------|------------|------------|------------|------------|------------|
| Q6I7R3 | Isoc1   | Isochorismatase domain-containing protein 1                            | 115.24  | 8.42  | 32002  | 2  | 8.3678E-05 | 2.72746043 | 0.00017291 | 2.64186375 | 0.00559431 | 2.1604483  |
| Q8BH69 | Sephs1  | Selenide, water dikinase 1                                             | 178.57  | 14.03 | 42907  | 4  | 0.00559439 | 2.43586676 | 0.00105008 | 2.78164633 | 0.00191449 | 2.56096887 |
| Q3TRM8 | Hk3     | Hexokinase-3                                                           | 1098.27 | 25.49 | 100101 | 17 | 4.8967E-05 | 3.39965898 | 0.00168661 | 2.0000524  | 0.00559941 | 1.8485828  |
| Q8BKZ9 | Pdhx    | Pyruvate dehydrogenase protein X component, mitochondrial              | 104.79  | 3.39  | 53999  | 2  | 0.00514636 | 4.45909335 | 9.2616E-05 | 3.68147038 | 0.00560764 | 4.16617803 |
| Q6P5H2 | Nes     | Nestin                                                                 | 2852.46 | 35.3  | 207124 | 39 | 0.00096645 | 1.78401186 | 0.00060177 | 1.85194328 | 0.00564002 | 1.58006817 |
| P16110 | Lgals3  | Galectin-3                                                             | 686.86  | 35.23 | 27515  | 12 | 0.00568    | 2.45041    | 0.00279538 | 1.76323258 | 0.00183561 | 1.54713434 |
| P04184 | Tk1     | Thymidine kinase, cytosolic                                            | 205.88  | 28.33 | 25776  | 5  | 0.00569512 | 1.81024888 | 0.00249319 | 1.65901809 | 0.00015182 | 1.80759823 |
| P99029 | Prdx5   | Peroxiredoxin-5, mitochondrial                                         | 730.88  | 57.14 | 21897  | 12 | 0.00576186 | 1.77613827 | 0.00023207 | 2.03440323 | 0.00421257 | 1.83890866 |
| Q9D819 | Ppa1    | Inorganic pyrophosphatase                                              | 241.96  | 17.3  | 32667  | 5  | 0.00578835 | 2.46501332 | 0.00221977 | 2.73310373 | 0.00385301 | 2.58843595 |
| Q9ES52 | Inpp5d  | Phosphatidylinositol 3,4,5-trisphosphate 5-phosphatase 1               | 1091.19 | 24.43 | 133542 | 23 | 0.00269122 | 1.68175723 | 0.00259162 | 1.6717643  | 0.00580496 | 1.59011953 |
| Q8BY71 | Hat1    | Histone acetyltransferase type B catalytic subunit                     | 346.34  | 15.62 | 49278  | 5  | 0.00600157 | 2.87820968 | 0.00449582 | 2.90366523 | 0.00468382 | 2.94867673 |
| Q1HFZ0 | Nsun2   | tRNA (cytosine(34)-C(5))-methyltransferase                             | 493     | 18.49 | 85452  | 10 | 0.00600721 | 1.95173314 | 2.5119E-05 | 2.27331095 | 0.00025872 | 2.161726   |
| Q9R0P3 | Esd     | S-formylglutathione hydrolase                                          | 950.34  | 68.44 | 31320  | 14 | 0.00010263 | 2.05259751 | 0.00037422 | 1.67526692 | 0.00601052 | 1.3919716  |
| Q3THK7 | Gmps    | GMP synthase [glutamine-hydrolyzing]                                   | 1087.14 | 43.43 | 76723  | 20 | 0.00601656 | 1.79927283 | 0.00087572 | 2.16898576 | 0.00285947 | 1.97265816 |
| Q1AAU6 | Asap1   | Arf-GAP with SH3 domain, ANK repeat and PH domain-containing protein 1 | 158.6   | 5.42  | 127088 | 3  | 0.00317527 | 2.35610375 | 0.00028003 | 2.36742577 | 0.00602618 | 1.88864448 |
| E9PVA8 | Gcn1    | eIF-2-alpha kinase activator GCN1                                      | 214.6   | 2.47  | 293021 | 6  | 0.00020474 | 4.07370519 | 0.00300287 | 2.8777809  | 0.00609331 | 2.65032746 |
| O70145 | Ncf2    | Neutrophil cytosol factor 2                                            | 518.48  | 29.14 | 59485  | 11 | 0.00612114 | 1.82646108 | 0.00298777 | 1.94973907 | 0.00497782 | 1.84478308 |
| B0BNE2 | Polr2e  | DNA-directed RNA polymerases I, II, and III subunit RPABC1             | 117.41  | 11.43 | 24570  | 2  | 0.00634737 | 0.71244263 | 0.0030702  | 0.69076465 | 0.00339416 | 0.6756427  |
| Q80TM9 | Nisch   | Nischarin                                                              | 244.24  | 3.45  | 175012 | 4  | 0.00185063 | 2.5337194  | 0.00286403 | 2.46679126 | 0.00635717 | 2.20084511 |
| Q9Z0H1 | Wdr46   | WD repeat-containing protein 46                                        | 425.78  | 22.19 | 69048  | 9  | 0.00054612 | 0.54431664 | 0.00366888 | 0.67848101 | 0.00647019 | 0.71991234 |
| P50516 | Atp6v1a | V-type proton ATPase catalytic subunit A                               | 1703.4  | 49.43 | 68326  | 26 | 2.7492E-05 | 2.22112073 | 0.00294102 | 1.49709679 | 0.00658536 | 1.42676281 |
| Q8BP47 | Nars    | Asparagine--tRNA ligase, cytoplasmic                                   | 784.23  | 27.55 | 64279  | 15 | 0.00099317 | 1.84823643 | 0.00279874 | 1.67116886 | 0.00658537 | 1.58590556 |
| Q80WS3 | Fbll1   | rRNA/tRNA 2'-O-methyltransferase fibrillar-like protein 1              | 157.08  | 11.46 | 33339  | 3  | 0.0010364  | 0.41582344 | 0.0023452  | 0.50750332 | 0.00662428 | 0.60754263 |
| P60229 | Eif3e   | Eukaryotic translation initiation factor 3 subunit E                   | 372.73  | 20.9  | 52221  | 8  | 0.00664188 | 2.65007207 | 0.00105346 | 1.91626213 | 0.00297193 | 2.13317696 |
| O54984 | Asna1   | ATPase Asna1                                                           | 230.76  | 14.08 | 38823  | 5  | 0.00211037 | 2.02492233 | 0.00671416 | 1.86585275 | 0.00573181 | 1.84474591 |
| Q9CQW0 | Dph5    | Diphthine methyl ester synthase                                        | 74.21   | 8.19  | 31218  | 1  | 0.00132034 | 2.80664959 | 0.00224398 | 2.81824319 | 0.00681359 | 2.36919581 |
| Q99LE6 | Abcf2   | ATP-binding cassette sub-family F member 2                             | 124.97  | 5.57  | 71782  | 3  | 0.00291517 | 3.11045077 | 0.00690356 | 2.69060936 | 0.00594491 | 2.65660923 |
| Q9JKX6 | Nudt5   | ADP-sugar pyrophosphatase                                              | 97.17   | 13.3  | 23984  | 2  | 0.00701588 | 1.68523625 | 0.00432038 | 1.74407689 | 0.00447315 | 1.78808205 |
| Q5U2Z5 | Cmtr1   | Cap-specific mRNA (nucleoside-2'-O)-methyltransferase 1                | 66.09   | 1.79  | 95619  | 2  | 0.00043544 | 5.22590944 | 0.00702654 | 2.9067964  | 0.00656304 | 3.13893434 |
| Q9CQI6 | Cotl1   | Coactosin-like protein                                                 | 599.88  | 76.06 | 15944  | 12 | 0.00407215 | 1.79639873 | 0.00372971 | 1.78222265 | 0.00705879 | 1.67374293 |
| P62075 | Timm13  | Mitochondrial import inner membrane translocase subunit Tim13          | 105.98  | 14.74 | 10458  | 1  | 0.00116629 | 6.77543311 | 0.00249036 | 5.31997606 | 0.0070811  | 4.86658575 |
| O08638 | Myh11   | Myosin-11                                                              | 590.56  | 5.48  | 227028 | 11 | 0.00022951 | 1.91686222 | 0.00499339 | 1.41159707 | 0.00713884 | 1.37918051 |



|        |          |                                                                          |         |       |        |    |            |            |            |            |            |            |
|--------|----------|--------------------------------------------------------------------------|---------|-------|--------|----|------------|------------|------------|------------|------------|------------|
| Q91YP3 | Dera     | Deoxyribose-phosphate aldolase                                           | 254.64  | 20.75 | 34975  | 5  | 0.00365743 | 2.0097772  | 0.00716126 | 1.89421225 | 0.00668626 | 1.8799762  |
| Q9CQE8 | RTRAF    | RNA transcription, translation and transport factor protein              | 48.88   | 12.3  | 28152  | 1  | 0.00426771 | 5.14073433 | 0.0020581  | 4.59837067 | 0.00723499 | 3.96928393 |
| Q99N69 | Lpxn     | Leupaxin                                                                 | 263.87  | 17.88 | 43478  | 6  | 0.00014668 | 2.97384308 | 0.00725674 | 2.33403524 | 0.00155661 | 2.31247393 |
| Q91V92 | Acly     | ATP-citrate synthase                                                     | 1852.34 | 31.35 | 119728 | 28 | 0.00111092 | 1.94343303 | 0.00445394 | 1.72848713 | 0.0072692  | 1.6634873  |
| Q6URW6 | Myh14    | Myosin-14                                                                | 471.68  | 4.1   | 228586 | 9  | 0.00023434 | 1.91347792 | 0.00563287 | 1.40389211 | 0.00727889 | 1.37821839 |
| Q99P31 | Hspbp1   | Hsp70-binding protein 1                                                  | 459.18  | 32.21 | 39167  | 9  | 0.0073778  | 2.44276334 | 0.00370042 | 2.54920178 | 0.00626055 | 2.44699221 |
| Q9D2V7 | Coro7    | Coronin-7                                                                | 438.61  | 16.49 | 100812 | 9  | 0.0014055  | 1.8068298  | 0.00050504 | 1.89814402 | 0.00739525 | 1.53926942 |
| Q9CT10 | Ranbp3   | Ran-binding protein 3                                                    | 374.52  | 16.9  | 52573  | 6  | 0.00748718 | 2.19859907 | 0.00396731 | 2.44793293 | 0.00686606 | 2.20615002 |
| Q5SW19 | Cluh     | Clustered mitochondria protein homolog                                   | 186.59  | 3.88  | 148068 | 4  | 0.00031844 | 3.92483771 | 0.00106718 | 4.03640327 | 0.0076046  | 3.43264051 |
| P80314 | Cct2     | T-complex protein 1 subunit beta                                         | 2029.75 | 64.3  | 57477  | 32 | 0.00602102 | 1.5886182  | 0.00191255 | 1.7381214  | 0.00773483 | 1.5519343  |
| Q8BK64 | Ahsa1    | Activator of 90 kDa heat shock protein ATPase homolog 1                  | 230.53  | 21.6  | 38117  | 6  | 0.0016784  | 2.03269591 | 0.0011837  | 2.14010469 | 0.00773516 | 1.88162176 |
| Q9DBG6 | Rpn2     | Dolichyl-diphosphooligosaccharide--protein glycosyltransferase subunit 2 | 875.04  | 29.32 | 69063  | 13 | 0.00550502 | 0.64068671 | 0.00200038 | 0.57910741 | 0.00775576 | 0.68355085 |
| P97429 | Anxa4    | Annexin A4                                                               | 1299.64 | 55.17 | 35916  | 18 | 4.3666E-05 | 1.68410592 | 0.00548331 | 0.71226128 | 0.00781038 | 0.73478368 |
| Q5FVC2 | Arhgef2  | Rho guanine nucleotide exchange factor 2                                 | 452.36  | 11.37 | 111909 | 8  | 0.00232244 | 1.28074535 | 5.9712E-05 | 1.43892932 | 0.00788938 | 1.26810899 |
| P43274 | Hist1h1e | Histone H1.4                                                             | 777.19  | 34.25 | 21977  | 12 | 0.00789738 | 0.61398814 | 0.00167902 | 0.49320356 | 0.00219742 | 0.49697065 |
| P62278 | Rps13    | 40S ribosomal protein S13                                                | 404.73  | 43.71 | 17222  | 8  | 0.00108896 | 2.49418337 | 0.00790672 | 2.01241563 | 0.00737892 | 2.03846065 |
| P63101 | Ywhaz    | 14-3-3 protein zeta/delta                                                | 956.45  | 48.98 | 27771  | 14 | 0.00791251 | 2.90642923 | 7.388E-05  | 2.84336312 | 0.00127445 | 2.33946406 |
| O88456 | Capns1   | Calpain small subunit 1                                                  | 189.41  | 15.99 | 28463  | 3  | 0.00040932 | 1.41212425 | 0.00792412 | 1.27678267 | 0.00614198 | 1.27636371 |
| Q91VI7 | Rnh1     | Ribonuclease inhibitor                                                   | 2016.51 | 74.78 | 49816  | 24 | 0.00086427 | 2.99091945 | 0.00251054 | 2.13558322 | 0.00796054 | 1.88201643 |
| Q8K124 | Plekho2  | Pleckstrin homology domain-containing family O member 2                  | 133.36  | 9.29  | 53872  | 3  | 0.00299181 | 1.93707901 | 0.00136054 | 2.06956153 | 0.00797745 | 1.7535     |
| Q7TPR4 | Actn1    | Alpha-actinin-1                                                          | 1152.69 | 26.46 | 103068 | 20 | 0.00118987 | 2.20513805 | 0.00125157 | 1.92855298 | 0.00802736 | 1.62730034 |
| Q5SUR0 | Pfas     | Phosphoribosylformylglycinamide synthase                                 | 1007.33 | 19.67 | 144629 | 19 | 0.00814288 | 1.60053424 | 0.0011337  | 1.87691942 | 0.00302342 | 1.79470347 |
| Q9CXY6 | Ilf2     | Interleukin enhancer-binding factor 2                                    | 529.81  | 37.18 | 43062  | 9  | 0.00815448 | 0.66749114 | 0.00305853 | 0.56664056 | 0.00675976 | 0.62151778 |
| Q8R4X3 | Rbm12    | RNA-binding protein 12                                                   | 166.15  | 4.03  | 102796 | 4  | 0.00823532 | 2.65476049 | 0.00569465 | 2.87740812 | 0.00049065 | 3.56682828 |
| P50396 | Gdi1     | Rab GDP dissociation inhibitor alpha                                     | 467.39  | 18.79 | 50522  | 8  | 0.00049535 | 2.05097132 | 0.0031058  | 1.83836288 | 0.00824178 | 1.61622128 |
| O55023 | Impa1    | Inositol monophosphatase 1                                               | 402.31  | 24.91 | 30436  | 8  | 0.00321843 | 1.77203565 | 0.00346333 | 1.7193419  | 0.00832134 | 1.61255713 |
| Q91VW3 | Sh3bgrl3 | SH3 domain-binding glutamic acid-rich-like protein 3                     | 216.58  | 31.18 | 10477  | 4  | 0.0083763  | 1.75594361 | 0.00119583 | 2.03185548 | 0.00530673 | 1.77669425 |
| Q3UM18 | Lsg1     | Large subunit GTPase 1 homolog                                           | 43.9    | 2.17  | 73157  | 1  | 0.00428261 | 3.26366676 | 0.00840032 | 2.90492971 | 0.00573071 | 3.01116186 |
| Q9WV03 | Fam50a   | Protein FAM50A                                                           | 137.26  | 12.68 | 40252  | 3  | 0.00841496 | 2.0112012  | 0.00527148 | 1.90574902 | 0.0030894  | 1.9192503  |
| P97360 | Etv6     | Transcription factor ETV6                                                | 50.2    | 1.44  | 56406  | 1  | 0.0042156  | 2.49828826 | 0.00246349 | 2.54978135 | 0.00842292 | 2.42334243 |
| Q61316 | Hspa4    | Heat shock 70 kDa protein 4                                              | 2312.93 | 56.84 | 94133  | 39 | 0.00742662 | 1.56171764 | 0.00385508 | 1.65665032 | 0.008437   | 1.55021988 |
| P32921 | Wars     | Tryptophan--tRNA ligase, cytoplasmic                                     | 568.58  | 30.77 | 54358  | 10 | 0.00410563 | 2.16492565 | 0.00264773 | 2.35103623 | 0.00848322 | 2.00807452 |
| Q99MZ7 | Peer     | Peroxisomal trans-2-enoyl-CoA reductase                                  | 118.11  | 7.92  | 32410  | 2  | 0.00071807 | 1.87314676 | 0.00861991 | 1.5637501  | 0.00485851 | 1.61372662 |
| Q62261 | Sptbn1   | Spectrin beta chain, non-erythrocytic 1                                  | 49.45   | 0.38  | 274223 | 1  | 0.00064678 | 6.6550757  | 0.00866224 | 2.99128282 | 0.006474   | 3.08350028 |
| P35444 | Comp     | Cartilage oligomeric matrix protein                                      | 38.6    | 1.06  | 82664  | 1  | 0.00187529 | 4.27022256 | 0.00563258 | 3.17840437 | 0.00867321 | 3.2162192  |
| Q6P1B1 | Xpnpep1  | Xaa-Pro aminopeptidase 1                                                 | 556.77  | 26.32 | 69591  | 11 | 0.00032096 | 2.01432982 | 0.00303658 | 1.69168705 | 0.00892801 | 1.53113705 |

|        |          |                                                       |         |       |        |    |            |            |            |            |            |            |
|--------|----------|-------------------------------------------------------|---------|-------|--------|----|------------|------------|------------|------------|------------|------------|
| P26516 | Psmid7   | 26S proteasome non-ATPase regulatory subunit 7        | 496.05  | 27.1  | 36540  | 8  | 0.00473427 | 1.78400374 | 0.0010331  | 1.81625517 | 0.0091668  | 1.58513868 |
| Q9WUP7 | Uchl5    | Ubiquitin carboxyl-terminal hydrolase isozyme L5      | 663.04  | 37.99 | 37617  | 14 | 0.00918017 | 2.19321169 | 0.00131906 | 2.24252157 | 0.0021652  | 2.13482273 |
| Q3TIR1 | Trappc13 | Trafficking protein particle complex subunit 13       | 96.87   | 8.87  | 46477  | 2  | 0.00454496 | 2.36846054 | 0.00925662 | 2.12968367 | 0.00428092 | 2.39619284 |
| O88545 | Cops6    | COP9 signalosome complex subunit 6                    | 168.65  | 8.33  | 35880  | 4  | 0.00289024 | 2.50720209 | 0.00295817 | 2.46247323 | 0.00935559 | 2.18048093 |
| P11103 | Parp1    | Poly [ADP-ribose] polymerase 1                        | 976.93  | 25.77 | 113100 | 18 | 0.00937351 | 1.33999928 | 8.5782E-05 | 1.64702984 | 1.2592E-05 | 1.42220583 |
| Q6A0A2 | Larp4b   | La-related protein 4B                                 | 64.5    | 2.29  | 81627  | 1  | 0.0096202  | 5.40469251 | 0.0051671  | 5.86774309 | 0.00617027 | 5.67490165 |
| Q9CYG7 | Tomm34   | Mitochondrial import receptor subunit TOM34           | 300.82  | 26.54 | 34278  | 6  | 0.0097182  | 1.72660016 | 0.00057325 | 1.64963674 | 0.00479124 | 1.6154123  |
| Q4QQT6 | Brix1    | Ribosome biogenesis protein BRX1 homolog              | 199.78  | 13.07 | 41115  | 5  | 0.00274098 | 0.48632593 | 0.00696295 | 0.59448842 | 0.00974651 | 0.65111495 |
| Q62192 | Cd180    | CD180 antigen                                         | 200.21  | 6.96  | 74302  | 3  | 0.00070231 | 3.62070511 | 0.00855097 | 2.57665573 | 0.00985371 | 2.54043644 |
| P05132 | Prkaca   | cAMP-dependent protein kinase catalytic subunit alpha | 277.34  | 16.24 | 40571  | 5  | 0.00025125 | 3.02003462 | 0.0081253  | 1.86260395 | 0.00994378 | 1.86277539 |
| Q3UIA2 | Arhgap17 | Rho GTPase-activating protein 17                      | 126.71  | 2.6   | 92202  | 2  | 0.00328174 | 1.67060298 | 0.00021863 | 1.69824467 | 0.00996226 | 1.3961404  |
| Q6ZQ08 | Cnot1    | CCR4-NOT transcription complex subunit 1              | 124.51  | 1.22  | 266808 | 3  | 0.00094143 | 3.14599573 | 0.00330019 | 2.58478315 | 0.00996849 | 2.24987767 |
| P62317 | Snrpd2   | Small nuclear ribonucleoprotein Sm D2                 | 359.22  | 52.54 | 13527  | 7  | 0.00036893 | 0.43743745 | 0.00997535 | 0.69937996 | 0.00504802 | 0.656274   |
| Q68FL6 | Mars     | Methionine--tRNA ligase, cytoplasmic                  | 821.32  | 21.4  | 101431 | 14 | 0.00231857 | 2.28413376 | 0.00380766 | 2.23174803 | 0.00998413 | 1.92522304 |
| O08739 | Ampd3    | AMP deaminase 3                                       | 42.12   | 0.91  | 88652  | 1  | 0.00089072 | 5.03781335 | 0.00998884 | 2.95916924 | 0.00925168 | 2.9308127  |
| Q9CVB6 | Arpc2    | Actin-related protein 2/3 complex subunit 2           | 913.72  | 46.33 | 34357  | 15 | 0.00216966 | 2.00882027 | 0.00394201 | 1.75275136 | 0.01002415 | 1.54101254 |
| Q9CPN8 | Igf2bp3  | Insulin-like growth factor 2 mRNA-binding protein 3   | 718.01  | 25.04 | 63575  | 12 | 0.00231054 | 1.78544989 | 0.00520482 | 1.58613127 | 0.01005202 | 1.49411623 |
| P68101 | Eif2s1   | Eukaryotic translation initiation factor 2 subunit 1  | 875.77  | 56.19 | 36108  | 15 | 0.00122016 | 1.77990786 | 0.00120487 | 1.76006107 | 0.01011524 | 1.50134903 |
| Q9ESL4 | Map3k20  | Mitogen-activated protein kinase kinase kinase 20     | 49.37   | 1.37  | 91720  | 1  | 0.00596638 | 2.41320931 | 0.00559181 | 2.37155768 | 0.01020082 | 2.2402711  |
| Q64674 | Srm      | Spermidine synthase                                   | 395.57  | 28.48 | 33995  | 7  | 0.008966   | 1.90247721 | 0.0088168  | 1.90474247 | 0.01023651 | 1.79640871 |
| P42225 | Stat1    | Signal transducer and activator of transcription 1    | 206.83  | 6.54  | 87197  | 3  | 0.01049524 | 2.8001083  | 0.00021956 | 4.11852707 | 0.0078638  | 3.40421503 |
| Q9D8W5 | Psmid12  | 26S proteasome non-ATPase regulatory subunit 12       | 660.49  | 26.75 | 52895  | 12 | 0.00192831 | 2.01469473 | 0.0060445  | 1.73240867 | 0.01051386 | 1.65360899 |
| Q64737 | Gart     | Trifunctional purine biosynthetic protein adenosine-3 | 1890.06 | 40.79 | 107503 | 29 | 0.01057131 | 1.70642623 | 0.00766986 | 1.76470249 | 0.00515051 | 1.7992495  |
| Q9QXK3 | Copg2    | Coatomer subunit gamma-2                              | 486.4   | 11.14 | 97681  | 8  | 0.00024675 | 2.04776473 | 0.00659819 | 1.81102758 | 0.01058971 | 1.56907055 |
| P47860 | Pfklp    | ATP-dependent 6-phosphofructokinase, platelet type    | 723.76  | 13.58 | 85720  | 9  | 0.00116711 | 1.96167276 | 0.00304995 | 1.70476886 | 0.0107005  | 1.54213843 |
| P63028 | Tpt1     | Translationally-controlled tumor protein              | 252.57  | 44.19 | 19462  | 4  | 0.01081335 | 3.1603284  | 0.00340094 | 3.82131594 | 0.00375839 | 2.8316569  |
| Q9D0F9 | Pgm1     | Phosphoglucomutase-1                                  | 431.85  | 17.08 | 61418  | 7  | 0.00712609 | 1.80880529 | 0.00639796 | 1.82094558 | 0.01089535 | 1.72682847 |
| A2AGT5 | Ckap5    | Cytoskeleton-associated protein 5                     | 457.24  | 5.81  | 225635 | 8  | 0.00148374 | 2.32080989 | 0.00437409 | 2.12821428 | 0.01101292 | 1.86263448 |
| P61982 | Ywhag    | 14-3-3 protein gamma                                  | 778.16  | 50.2  | 28303  | 14 | 0.01102109 | 3.43726853 | 5.5187E-05 | 3.30040113 | 0.0007996  | 2.70817269 |
| Q9DBL7 | Coasy    | Bifunctional coenzyme A synthase                      | 248.51  | 14.03 | 62023  | 5  | 0.00276322 | 1.97941254 | 0.0046899  | 1.87399365 | 0.01107071 | 1.71773872 |
| Q8R016 | Blmh     | Bleomycin hydrolase                                   | 445.03  | 25.71 | 52511  | 9  | 0.01110962 | 3.00131526 | 0.00375562 | 2.60631235 | 0.01072846 | 2.29179313 |

|        |         |                                                                          |         |       |        |    |            |            |            |            |            |            |
|--------|---------|--------------------------------------------------------------------------|---------|-------|--------|----|------------|------------|------------|------------|------------|------------|
| Q99KK7 | Dpp3    | Dipeptidyl peptidase 3                                                   | 655.5   | 29.67 | 82898  | 12 | 0.00303878 | 2.08946436 | 0.00236496 | 2.1470463  | 0.01111488 | 1.8024507  |
| P57780 | Actn4   | Alpha-actinin-4                                                          | 1551.8  | 35.31 | 104977 | 25 | 0.00242179 | 2.09795296 | 0.00160951 | 1.8922955  | 0.01118874 | 1.60534069 |
| Q9CQV8 | Ywhab   | 14-3-3 protein beta/alpha                                                | 847.91  | 48.37 | 28086  | 13 | 0.01125804 | 3.72619374 | 7.4442E-05 | 3.74242923 | 0.00096917 | 2.95242764 |
| O35593 | Psm14   | 26S proteasome non-ATPase regulatory subunit 14                          | 324.09  | 27.1  | 34577  | 6  | 0.00252834 | 2.67970453 | 0.007176   | 2.35039481 | 0.0112923  | 2.20631872 |
| P62329 | Tmsb4x  | Thymosin beta-4                                                          | 241.93  | 68.18 | 5053   | 4  | 0.00079647 | 2.2575374  | 0.00251354 | 1.85855477 | 0.01135099 | 1.63757322 |
| P68254 | Ywhaq   | 14-3-3 protein theta                                                     | 757.04  | 44.08 | 27778  | 12 | 0.01149333 | 3.86422706 | 6.3998E-05 | 3.97172384 | 0.00095664 | 3.09582993 |
| O89053 | Coro1a  | Coronin-1A                                                               | 1683.42 | 52.93 | 50989  | 27 | 0.01153418 | 1.26428259 | 0.00873765 | 1.28930416 | 0.00540547 | 1.24534617 |
| Q91YQ5 | Rpn1    | Dolichyl-diphosphooligosaccharide--protein glycosyltransferase subunit 1 | 1542.48 | 52.96 | 68528  | 26 | 0.01164191 | 0.77430334 | 0.00237197 | 0.69387136 | 0.00922413 | 0.76775143 |
| P97823 | Lypl1   | Acyl-protein thioesterase 1                                              | 243.92  | 26.52 | 24688  | 4  | 0.00981292 | 2.20438901 | 0.00504534 | 2.35535751 | 0.01169479 | 2.0547268  |
| Q8VEE4 | Rpa1    | Replication protein A 70 kDa DNA-binding subunit                         | 669.48  | 23.76 | 69037  | 13 | 0.00864025 | 1.28815915 | 0.00305208 | 1.36794389 | 0.01169795 | 1.26487447 |
| Q3TC93 | Hs1bp3  | HCLS1-binding protein 3                                                  | 64.99   | 7.09  | 43691  | 2  | 0.0118285  | 4.3982344  | 0.00153068 | 3.65552526 | 0.0034517  | 3.01263051 |
| Q9WVQ5 | Apip    | Methylthioribulose-1-phosphate dehydratase                               | 149.19  | 15.35 | 26949  | 3  | 0.0011709  | 3.80861917 | 0.01185165 | 2.72759373 | 0.01017985 | 2.793871   |
| P68510 | Ywhah   | 14-3-3 protein eta                                                       | 540.26  | 32.52 | 28212  | 10 | 0.01185252 | 4.24173441 | 8.3016E-05 | 4.21242647 | 0.00104642 | 3.30018323 |
| P61924 | Copz1   | Coatomer subunit zeta-1                                                  | 104.24  | 22.03 | 20198  | 3  | 0.01188518 | 2.8487158  | 0.00203767 | 3.21401831 | 0.00150165 | 2.92397124 |
| Q9JJU8 | Sh3bgr1 | SH3 domain-binding glutamic acid-rich-like protein                       | 362.73  | 70.18 | 12811  | 6  | 0.00384538 | 1.7702329  | 0.00158112 | 1.88170617 | 0.01193199 | 1.59758825 |
| Q60902 | Eps15l1 | Epidermal growth factor receptor substrate 15-like 1                     | 40.21   | 0.88  | 99309  | 1  | 0.01196475 | 7.58522997 | 0.00297321 | 6.90367382 | 0.00217316 | 6.73479465 |
| Q3ZAV8 | Edc4    | Enhancer of mRNA-decapping protein 4                                     | 254.96  | 5.12  | 152596 | 4  | 0.00282114 | 2.73189985 | 0.00614262 | 2.46379115 | 0.01198324 | 2.365578   |
| P85972 | Vcl     | Vinculin                                                                 | 822.95  | 16.79 | 116615 | 16 | 0.00010328 | 3.34406623 | 0.00343084 | 2.24702026 | 0.01199627 | 1.97484408 |
| O89023 | Tpp1    | Tripeptidyl-peptidase 1                                                  | 296.49  | 13.7  | 61342  | 5  | 0.0003403  | 2.38501797 | 0.0071549  | 1.62971152 | 0.01202099 | 1.5266068  |
| Q68FD5 | Cltc    | Clathrin heavy chain 1                                                   | 4125.47 | 48.42 | 191557 | 66 | 0.00059639 | 1.74239566 | 0.00408221 | 1.42125781 | 0.01207601 | 1.33447101 |
| Q8BFY9 | Tnpo1   | Transportin-1                                                            | 422.59  | 8.91  | 102357 | 8  | 0.00314217 | 2.52869094 | 0.0117011  | 2.14415203 | 0.01215523 | 2.14197289 |
| Q62465 | Vat1    | Synaptic vesicle membrane protein VAT-1 homolog                          | 696.42  | 37.19 | 43097  | 12 | 2.4693E-05 | 3.7232436  | 0.00160321 | 1.94428401 | 0.01216195 | 1.65079689 |
| O35643 | Ap1b1   | AP-1 complex subunit beta-1                                              | 1039.42 | 27.47 | 103935 | 18 | 0.00651075 | 1.59468982 | 0.01216399 | 1.51999839 | 0.00738988 | 1.57306288 |
| Q9JM76 | Arcp3   | Actin-related protein 2/3 complex subunit 3                              | 372.7   | 44.38 | 20525  | 7  | 0.01232484 | 1.38658435 | 0.00251276 | 1.65860434 | 0.00698978 | 1.42848097 |
| Q61655 | Ddx19a  | ATP-dependent RNA helicase DDX19A                                        | 562.17  | 30.54 | 53933  | 10 | 0.01236185 | 1.59606029 | 0.00349113 | 1.82853262 | 0.00183726 | 1.85919246 |
| Q9R0N0 | Galk1   | Galactokinase                                                            | 443.6   | 24.49 | 42295  | 9  | 0.00086948 | 2.79198867 | 0.00443582 | 2.34589072 | 0.01236571 | 2.01293141 |
| Q11011 | Npepps  | Puromycin-sensitive aminopeptidase                                       | 553.2   | 11.3  | 103325 | 10 | 0.00153296 | 2.23537255 | 0.00191186 | 2.11147298 | 0.01258513 | 1.74998017 |
| P27870 | Vav1    | Proto-oncogene vav                                                       | 383.45  | 11.12 | 98137  | 8  | 4.6431E-05 | 2.60801711 | 0.00795862 | 1.62161135 | 0.01266437 | 1.55596119 |
| Q8CIE6 | Copa    | Coatomer subunit alpha                                                   | 1255.51 | 23.2  | 138432 | 23 | 0.00117866 | 1.80398437 | 0.00401636 | 1.59443144 | 0.01269316 | 1.46584444 |
| Q61699 | Hsph1   | Heat shock protein 105 kDa                                               | 570.99  | 15.27 | 96407  | 10 | 0.00742817 | 2.21300297 | 0.00975393 | 2.16231721 | 0.01292059 | 2.12031647 |
| Q9D8E6 | Rpl4    | 60S ribosomal protein L4                                                 | 1231.25 | 43.44 | 47154  | 19 | 0.01293427 | 0.79103727 | 0.00605106 | 1.31501654 | 0.00902844 | 1.29681625 |
| P62908 | Rps3    | 40S ribosomal protein S3                                                 | 1407.47 | 75.72 | 26674  | 25 | 0.00847714 | 1.6575241  | 0.01302561 | 1.61399595 | 0.00916213 | 1.62840332 |
| O35626 | Rasd1   | Dexamethasone-induced Ras-related protein 1                              | 38.44   | 2.5   | 31684  | 1  | 0.0057892  | 3.20477177 | 0.01306511 | 2.8785153  | 0.01145799 | 2.81527332 |
| Q9WUA3 | Pfkl    | ATP-dependent 6-phosphofructokinase, platelet type                       | 1615    | 44.9  | 85455  | 23 | 0.00097149 | 2.02539639 | 0.00344987 | 1.78819363 | 0.01307974 | 1.59650442 |
| Q64152 | Btf3    | Transcription factor BTF3                                                | 627.07  | 41.67 | 22031  | 9  | 0.01310571 | 1.50626455 | 0.00070093 | 1.83701155 | 0.00168054 | 1.74594055 |

|        |         |                                                            |         |       |        |    |            |            |            |            |            |            |
|--------|---------|------------------------------------------------------------|---------|-------|--------|----|------------|------------|------------|------------|------------|------------|
| Q9JLV6 | Pnkp    | Bifunctional polynucleotide phosphatase/kinase             | 384.78  | 21.65 | 57223  | 6  | 0.01333075 | 1.90586569 | 0.001088   | 2.18189934 | 0.0051578  | 1.8722446  |
| Q9JHU9 | Isyna1  | Inositol-3-phosphate synthase 1                            | 818.03  | 29.62 | 60932  | 14 | 0.01135643 | 1.69839714 | 0.00741395 | 1.79778404 | 0.01336193 | 1.67548929 |
| Q64701 | Rbl1    | Retinoblastoma-like protein 1                              | 57.19   | 0.85  | 119456 | 1  | 0.00853333 | 3.37485456 | 0.00615889 | 3.07850634 | 0.01337873 | 2.88814369 |
| P29391 | Ftl1    | Ferritin light chain 1                                     | 538.2   | 49.18 | 20802  | 9  | 0.01340982 | 1.56457006 | 0.00067923 | 1.8660712  | 0.00364122 | 1.6540009  |
| P29452 | Casp1   | Caspase-1                                                  | 368.14  | 20.4  | 45640  | 7  | 0.00129632 | 2.20153931 | 0.00456577 | 1.97592971 | 0.0135596  | 1.73820356 |
| P24547 | Impdh2  | Inosine-5'-monophosphate dehydrogenase 2                   | 1327.83 | 39.49 | 55815  | 21 | 0.00467539 | 1.9612914  | 0.00576235 | 1.93530609 | 0.01368977 | 1.77809452 |
| P97311 | Mcm6    | DNA replication licensing factor MCM6                      | 1179.58 | 31.06 | 92867  | 20 | 0.01379    | 1.12479118 | 0.00255667 | 1.33469709 | 0.00801658 | 1.18851543 |
| Q9EQK5 | Mvp     | Major vault protein                                        | 1635.94 | 43.32 | 95924  | 27 | 6.3272E-05 | 1.83480618 | 0.00277484 | 1.38014116 | 0.0138578  | 1.26922128 |
| O70456 | Sfn     | 14-3-3 protein sigma                                       | 158.96  | 12.1  | 27706  | 4  | 0.01386661 | 4.77773204 | 9.1009E-05 | 4.86969911 | 0.00101367 | 3.74191084 |
| P60892 | Prps1   | Ribose-phosphate pyrophosphokinase 1                       | 692     | 38.99 | 34834  | 14 | 0.00293677 | 1.77954687 | 0.01036453 | 1.60037607 | 0.01395034 | 1.55739398 |
| P97814 | Pstpip1 | Proline-serine-threonine phosphatase-interacting protein 1 | 136.51  | 8.92  | 47590  | 2  | 0.01404523 | 3.13393141 | 0.00230981 | 2.84721269 | 0.00535192 | 2.5712778  |
| O35344 | Kpna3   | Importin subunit alpha-4                                   | 219.47  | 9.21  | 57773  | 3  | 0.0030227  | 1.70229045 | 0.00064438 | 1.86730798 | 0.01405618 | 1.56949804 |
| Q8CI51 | Pdlim5  | PDZ and LIM domain protein 5                               | 341.34  | 16.24 | 63299  | 7  | 0.00201011 | 2.44149867 | 0.00369845 | 2.26256555 | 0.01411944 | 1.94005745 |
| Q91YI0 | Asl     | Argininosuccinate lyase                                    | 446.52  | 23.28 | 51739  | 9  | 0.00986581 | 4.56989509 | 0.00030277 | 2.74060914 | 0.01421357 | 2.57123115 |
| Q922D8 | Mthfd1  | C-1-tetrahydrofolate synthase, cytoplasmic                 | 1267.38 | 30.05 | 101200 | 25 | 0.01425468 | 1.60915838 | 0.00235756 | 1.84931023 | 0.01233698 | 1.61178568 |
| Q6P7P5 | Bzw1    | Basic leucine zipper and W2 domain-containing protein 1    | 165.36  | 12.65 | 48043  | 4  | 0.01429354 | 2.59191696 | 0.00396816 | 2.49533869 | 0.00230371 | 2.52230883 |
| Q9CS42 | Prps2   | Ribose-phosphate pyrophosphokinase 2                       | 700.74  | 38.05 | 34786  | 13 | 0.00587493 | 1.71125473 | 0.0119677  | 1.62513729 | 0.01434551 | 1.59075453 |
| Q8CG48 | Smc2    | Structural maintenance of chromosomes protein 2            | 717.19  | 15.03 | 134239 | 14 | 0.01440702 | 1.64848593 | 0.0036029  | 2.15783547 | 0.00237216 | 1.79214874 |
| P70698 | Ctps1   | CTP synthase 1                                             | 300.54  | 13.54 | 66682  | 6  | 0.00780097 | 1.9806349  | 0.00420713 | 2.10254935 | 0.014408   | 1.85297967 |
| Q80UG5 | Sept9   | Septin-9                                                   | 280.17  | 15.09 | 65575  | 6  | 0.00498564 | 1.90691751 | 0.0092532  | 1.77628273 | 0.01458151 | 1.70328967 |
| P41542 | Uso1    | General vesicular transport factor p115                    | 208.86  | 6.26  | 107162 | 5  | 0.01459747 | 5.60508157 | 0.00131092 | 3.61815312 | 0.011886   | 2.95517781 |
| O08539 | Bin1    | Myc box-dependent-interacting protein 1                    | 257.22  | 14.12 | 64470  | 5  | 0.00059749 | 1.70426064 | 0.0111887  | 1.52600394 | 0.01467834 | 1.43462441 |
| Q8K2H2 | Otud6b  | Deubiquitinase OTUD6B                                      | 56.43   | 4.42  | 33758  | 1  | 0.0058903  | 1.72767252 | 0.00421087 | 1.82136054 | 0.01468648 | 1.64671662 |
| O08807 | Prdx4   | Peroxiredoxin-4                                            | 450.91  | 46.72 | 31053  | 10 | 0.01262152 | 3.79366089 | 0.01395586 | 2.76811746 | 0.01479374 | 3.0136146  |
| Q8VE47 | Uba5    | Ubiquitin-like modifier-activating enzyme 5                | 172.25  | 12.16 | 44790  | 3  | 0.00536551 | 3.95120937 | 0.00584772 | 3.8229462  | 0.01487708 | 3.09335054 |
| P61759 | Vbp1    | Prefoldin subunit 3                                        | 245.47  | 32.14 | 22436  | 5  | 0.01306699 | 3.14104236 | 0.01488227 | 3.02429811 | 0.01121192 | 3.13734596 |
| Q8K1R7 | Nek9    | Serine/threonine-protein kinase Nek9                       | 179.81  | 5.39  | 107143 | 4  | 0.01282458 | 2.26772634 | 0.00289355 | 2.2724479  | 0.01496115 | 2.04977064 |
| Q9DBG5 | Plin3   | Perilipin-3                                                | 847.34  | 42.79 | 47262  | 13 | 5.7478E-05 | 2.69124804 | 0.00785389 | 1.72692256 | 0.01497033 | 1.59110506 |
| Q8K0C9 | Gmds    | GDP-mannose 4,6 dehydratase                                | 127.7   | 6.72  | 41985  | 2  | 0.01497472 | 4.15792285 | 0.01490694 | 3.41357701 | 0.00795831 | 3.70428436 |
| Q8VBW6 | Nae1    | NEDD8-activating enzyme E1 regulatory subunit              | 117.42  | 4.68  | 60274  | 2  | 0.0150448  | 4.29605847 | 0.00102076 | 3.68066202 | 0.00222686 | 2.99596093 |
| Q9R1T2 | Sae1    | SUMO-activating enzyme subunit 1                           | 772     | 46.57 | 38620  | 14 | 0.00873978 | 2.02017821 | 0.00278932 | 2.1745769  | 0.01508876 | 1.79045082 |
| Q99J77 | Nans    | Sialic acid synthase                                       | 490.18  | 37.05 | 40024  | 9  | 0.00571753 | 2.30610314 | 0.00793508 | 2.24277646 | 0.01523056 | 2.09708339 |
| Q80UM3 | Naa15   | N-alpha-acetyltransferase 15, NatA auxiliary subunit       | 438.56  | 14.1  | 100961 | 9  | 0.00085638 | 2.83885822 | 0.0152971  | 2.01687204 | 0.01366705 | 2.03877833 |
| Q922B2 | Dars    | Aspartate--tRNA ligase, cytoplasmic                        | 1347.24 | 53.09 | 57147  | 25 | 0.00882853 | 1.64928121 | 0.00420408 | 1.73333781 | 0.01535837 | 1.56821168 |
| P21300 | Akr1b7  | Aldose reductase-related protein 1                         | 337.12  | 13.92 | 35988  | 7  | 0.00124418 | 1.67543821 | 0.00198853 | 1.41934951 | 0.0153678  | 1.30021728 |



|        |          |                                                                                   |         |       |        |    |            |            |            |            |            |            |
|--------|----------|-----------------------------------------------------------------------------------|---------|-------|--------|----|------------|------------|------------|------------|------------|------------|
| Q9CR16 | Ppid     | Peptidyl-prolyl cis-trans isomerase D                                             | 365.23  | 17.3  | 40743  | 6  | 0.01543977 | 1.8817826  | 0.00019022 | 2.59762394 | 0.00120198 | 2.33159348 |
| P05201 | Got1     | Aspartate aminotransferase, cytoplasmic                                           | 924.57  | 44.79 | 46248  | 16 | 0.00053469 | 2.13319128 | 0.00535063 | 1.71883766 | 0.01548456 | 1.57214479 |
| P50518 | Atp6v1e1 | V-type proton ATPase subunit E 1                                                  | 463.81  | 41.59 | 26157  | 8  | 0.00731144 | 1.31380036 | 0.00890692 | 1.32786387 | 0.01548741 | 1.25813777 |
| Q91WQ3 | Yars     | Tyrosine--tRNA ligase, cytoplasmic                                                | 429.69  | 22.92 | 59105  | 10 | 0.00811271 | 1.82973205 | 0.00408499 | 1.9734649  | 0.01554316 | 1.68264335 |
| Q60865 | Caprin1  | Caprin-1                                                                          | 810.19  | 24.89 | 78169  | 14 | 0.01561813 | 1.84725197 | 0.00343468 | 2.03706762 | 0.00388513 | 1.98376526 |
| Q8C052 | Map1s    | Microtubule-associated protein 1S                                                 | 144.55  | 3.8   | 102939 | 3  | 0.00831686 | 2.34691435 | 0.0123184  | 2.17145469 | 0.01572284 | 2.09300365 |
| Q3V1L4 | Nt5c2    | Cytosolic purine 5'-nucleotidase                                                  | 252.59  | 10.18 | 64809  | 5  | 0.01572653 | 2.27276323 | 0.0092182  | 2.43344306 | 0.01030758 | 2.38417881 |
| P10518 | Alad     | Delta-aminolevulinic acid dehydratase                                             | 433.91  | 32.12 | 36024  | 7  | 0.01575555 | 2.45162431 | 0.00051783 | 2.68312291 | 0.00425123 | 2.19358104 |
| Q80X50 | Ubap2l   | Ubiquitin-associated protein 2-like                                               | 395.32  | 10.03 | 116799 | 6  | 0.01578892 | 1.87205897 | 0.00684492 | 2.03690191 | 0.00906395 | 1.97527899 |
| Q91XU1 | Qki      | Protein quaking                                                                   | 278.1   | 23.17 | 37643  | 5  | 0.00137872 | 1.50317479 | 0.00050254 | 1.5186154  | 0.01583223 | 1.43848811 |
| Q8BQM4 | Heatr3   | HEAT repeat-containing protein 3                                                  | 196.51  | 7.22  | 74305  | 4  | 0.01583844 | 2.39157976 | 0.01497644 | 2.42281052 | 0.0150015  | 2.42077633 |
| P61965 | Wdr5     | WD repeat-containing protein 5                                                    | 83.17   | 4.19  | 36588  | 1  | 0.00770024 | 3.20484955 | 0.01504891 | 2.75348509 | 0.01586185 | 2.71117771 |
| Q80YW0 | Cyth4    | Cytohesin-4                                                                       | 46.49   | 2.54  | 45285  | 1  | 0.00389308 | 3.36576861 | 0.01188443 | 2.69482828 | 0.01592088 | 2.583298   |
| P62869 | Elob     | Elongin-B                                                                         | 518.34  | 66.95 | 13170  | 10 | 0.01592281 | 2.12597761 | 0.00958745 | 2.1082206  | 0.01505218 | 1.98930319 |
| P31230 | Aimp1    | Aminoacyl tRNA synthase complex-interacting multifunctional protein 1             | 401.65  | 45.16 | 33997  | 8  | 0.00119817 | 1.75613977 | 0.01594302 | 1.44267214 | 0.0050613  | 1.4865485  |
| D3ZYR1 | Fcho2    | F-BAR domain only protein 2                                                       | 49.33   | 2.97  | 88712  | 1  | 0.00435618 | 4.28453116 | 0.01619426 | 4.95990748 | 0.00209817 | 4.63544887 |
| Q8R180 | Ero1a    | ERO1-like protein alpha                                                           | 441.46  | 17.89 | 54084  | 8  | 0.01043578 | 2.48756702 | 0.01623229 | 2.30877581 | 0.01229108 | 2.39453963 |
| P35979 | Rpl12    | 60S ribosomal protein L12                                                         | 472.11  | 49.7  | 17805  | 6  | 0.0162397  | 1.32336812 | 0.00121557 | 1.52298826 | 0.00133828 | 1.53906608 |
| P43277 | Hist1h1d | Histone H1.3                                                                      | 813.93  | 38.01 | 22100  | 13 | 0.01634447 | 0.59091289 | 0.00684338 | 0.50916791 | 0.00829423 | 0.506775   |
| P80315 | Cct4     | T-complex protein 1 subunit delta                                                 | 2112.64 | 60.67 | 58066  | 29 | 0.01391766 | 1.57542115 | 0.00502424 | 1.73844345 | 0.01635686 | 1.54408258 |
| O70593 | Sgta     | Small glutamine-rich tetratricopeptide repeat-containing protein alpha            | 316.14  | 23.89 | 34157  | 6  | 0.00879279 | 1.81703353 | 0.01669315 | 1.72117893 | 0.01224964 | 1.77985101 |
| Q920A5 | Scepe1   | Retinoid-inducible serine carboxypeptidase                                        | 331.76  | 19.03 | 50965  | 7  | 0.0004099  | 2.8752249  | 0.00983286 | 2.06660727 | 0.01670195 | 1.89895759 |
| Q68FL4 | Ahcyl2   | Putative adenosylhomocysteinase 3                                                 | 238.46  | 7.01  | 66899  | 5  | 0.01670437 | 2.65994044 | 0.00287117 | 3.34846301 | 0.01365973 | 2.76222077 |
| Q99M31 | Hspa14   | Heat shock 70 kDa protein 14                                                      | 198.91  | 10.81 | 54650  | 4  | 0.01671701 | 2.00172747 | 0.01162644 | 2.12728439 | 0.01426866 | 2.0404933  |
| Q8R1Q8 | Dync1li1 | Cytoplasmic dynein 1 light intermediate chain 1                                   | 437.14  | 22.18 | 56614  | 7  | 0.00291871 | 2.08694765 | 0.00646816 | 2.00165858 | 0.0167581  | 1.73824271 |
| Q64261 | Cdk6     | Cyclin-dependent kinase 6                                                         | 254.71  | 26.69 | 37028  | 6  | 0.00678524 | 2.52218393 | 0.00405253 | 2.62715599 | 0.01675877 | 2.1791706  |
| Q9D0R2 | Tars     | Threonine--tRNA ligase, cytoplasmic                                               | 1509.11 | 42.52 | 83356  | 27 | 0.00208139 | 2.39805316 | 0.00847284 | 2.04525472 | 0.01678169 | 1.88727945 |
| Q8R317 | Ubqln1   | Ubiquilin-1                                                                       | 106.21  | 5.5   | 61976  | 2  | 0.00425588 | 2.16641368 | 0.00798955 | 2.15652315 | 0.01691308 | 1.97832078 |
| Q9Z0N1 | Eif2s3x  | Eukaryotic translation initiation factor 2 subunit 3, X-linked                    | 1076    | 43.64 | 51065  | 18 | 0.00194641 | 1.55654939 | 0.00681801 | 1.43493524 | 0.01695843 | 1.34670194 |
| P11983 | Tcp1     | T-complex protein 1 subunit alpha                                                 | 2145.54 | 64.57 | 60449  | 31 | 0.01716887 | 1.5139812  | 0.00757772 | 1.61480301 | 0.01718228 | 1.52430482 |
| O08618 | Prpsap2  | Phosphoribosyl pyrophosphate synthase-associated protein 2                        | 179.36  | 11.92 | 40867  | 3  | 0.01744194 | 1.76333784 | 0.0048627  | 2.06253887 | 0.01336708 | 1.79432297 |
| Q91WU5 | As3mt    | Arsenite methyltransferase                                                        | 146.66  | 13.3  | 41794  | 3  | 0.01745615 | 2.60141817 | 0.0018034  | 2.93221593 | 0.0145237  | 2.26337155 |
| Q8BU30 | Iars     | Isoleucine--tRNA ligase, cytoplasmic                                              | 391.51  | 7.21  | 144271 | 8  | 0.00092738 | 2.9502803  | 0.00194861 | 2.6659746  | 0.01754628 | 2.0694212  |
| P15864 | Hist1h1c | Histone H1.2                                                                      | 908.99  | 43.4  | 21267  | 14 | 0.01757661 | 0.59979847 | 0.00731404 | 0.51570212 | 0.00936554 | 0.5211681  |
| P36876 | Ppp2r2a  | Serine/threonine-protein phosphatase 2A 55 kDa regulatory subunit B alpha isoform | 410.72  | 18.79 | 51678  | 8  | 0.01187824 | 1.80279655 | 0.00855695 | 1.87381665 | 0.01778083 | 1.69215495 |
| Q9QYI3 | Dnajc7   | DnaJ homolog subfamily C member 7                                                 | 224.76  | 8.1   | 56476  | 3  | 0.01779663 | 1.90192445 | 0.00404674 | 2.18229088 | 0.00267067 | 2.17642848 |
| Q01730 | Rsu1     | Ras suppressor protein 1                                                          | 148.7   | 24.19 | 31550  | 3  | 0.01753895 | 2.17210426 | 0.00143004 | 2.77437088 | 0.01792899 | 2.18314966 |

|        |         |                                                                                   |         |       |        |    |            |            |            |            |            |            |
|--------|---------|-----------------------------------------------------------------------------------|---------|-------|--------|----|------------|------------|------------|------------|------------|------------|
| P35738 | Bckdhb  | 2-oxoisovalerate dehydrogenase subunit beta, mitochondrial                        | 69.84   | 2.82  | 42823  | 1  | 0.00245432 | 5.19677231 | 0.01796007 | 3.43924875 | 0.00582005 | 4.26739506 |
| O70325 | Gpx4    | Phospholipid hydroperoxide glutathione peroxidase                                 | 95.59   | 11.68 | 22229  | 2  | 0.00020075 | 2.7238284  | 0.00622928 | 1.89466517 | 0.01806753 | 1.84572476 |
| P62774 | Mtpn    | Myotrophin                                                                        | 239.8   | 35.59 | 12861  | 3  | 0.01822485 | 2.01811078 | 0.00163008 | 2.80908485 | 0.00573606 | 2.36491178 |
| Q64105 | Spr     | Sepiapterin reductase                                                             | 763.56  | 59.39 | 27883  | 12 | 0.01825109 | 1.68781506 | 0.0005578  | 2.0902804  | 0.00197497 | 1.84630512 |
| Q76MZ3 | Ppp2r1a | Serine/threonine-protein phosphatase 2A 65 kDa regulatory subunit A alpha isoform | 1267.77 | 41.77 | 65323  | 20 | 0.0022453  | 1.86307563 | 0.00934005 | 1.6280552  | 0.01859034 | 1.52956639 |
| Q9WTM5 | Ruvbl2  | RuvB-like 2                                                                       | 874.24  | 33.26 | 51113  | 15 | 0.01870116 | 1.19455657 | 0.01833478 | 1.19119116 | 0.01198862 | 1.19434253 |
| P62196 | Psmc5   | 26S proteasome regulatory subunit 8                                               | 759.97  | 40.39 | 45626  | 13 | 0.01892546 | 1.19654694 | 0.00841795 | 1.46347409 | 0.00012766 | 1.44623033 |
| Q8CHP8 | Pgp     | Glycerol-3-phosphate phosphatase                                                  | 436.34  | 35.2  | 34541  | 8  | 0.01912144 | 2.04701376 | 0.00747113 | 2.33961052 | 0.01425761 | 2.14426835 |
| P81799 | Nagk    | N-acetyl-D-glucosamine kinase                                                     | 56.74   | 2.92  | 37196  | 1  | 0.00022515 | 5.63744467 | 0.00190332 | 3.90399187 | 0.01914992 | 2.68400621 |
| Q6A0A9 | FAM120A | Constitutive coactivator of PPAR-gamma-like protein 1                             | 371.15  | 9.71  | 121646 | 8  | 0.01917921 | 1.41516103 | 6.7606E-05 | 1.52395975 | 0.00024157 | 1.42359259 |
| Q91VX2 | Ubap2   | Ubiquitin-associated protein 2                                                    | 204.92  | 5.57  | 117966 | 4  | 0.01922225 | 2.52669895 | 0.0031892  | 3.29481862 | 0.0046678  | 3.25023138 |
| Q53UA7 | Taok3   | Serine/threonine-protein kinase TAO3                                              | 164.73  | 5.01  | 105474 | 4  | 0.00191131 | 1.61005469 | 0.00966163 | 1.58426721 | 0.01928865 | 1.49265275 |
| Q8C0M9 | Asrg11  | Isoaspartyl peptidase/L-asparaginase                                              | 169.81  | 11.04 | 33950  | 3  | 0.01183379 | 2.24578458 | 0.01939157 | 2.22358014 | 0.01209901 | 2.23781103 |
| P31750 | Akt1    | RAC-alpha serine/threonine-protein kinase                                         | 48.16   | 1.67  | 55707  | 1  | 0.00081614 | 3.25913108 | 0.0028756  | 2.63246496 | 0.01948558 | 2.10121201 |
| Q9Z1F9 | Uba2    | SUMO-activating enzyme subunit 2                                                  | 895.4   | 44.83 | 70569  | 16 | 0.0196474  | 1.80132431 | 0.00839548 | 1.99801439 | 0.01479177 | 1.85577346 |
| Q8K2Z4 | Ncapd2  | Condensin complex subunit 1                                                       | 266.42  | 6.03  | 155665 | 6  | 0.00086854 | 2.5805551  | 0.00993117 | 1.96535389 | 0.01972548 | 1.87743138 |
| Q9D1A2 | Cndp2   | Cytosolic non-specific dipeptidase                                                | 693.95  | 35.37 | 52767  | 13 | 0.00076686 | 2.58556017 | 0.00368463 | 1.97943954 | 0.01983001 | 1.69705581 |
| P03995 | Gfap    | Glial fibrillary acidic protein                                                   | 164.37  | 6.05  | 49900  | 3  | 0.01991236 | 3.11645348 | 0.00348299 | 1.82536956 | 0.01084924 | 1.65745195 |
| Q5XIG8 | Strap   | Serine-threonine kinase receptor-associated protein                               | 524.02  | 46.57 | 38456  | 8  | 0.02005119 | 2.11047004 | 0.01138976 | 2.26597335 | 0.01936298 | 2.11604368 |
| O88844 | Idh1    | Isocitrate dehydrogenase [NADP] cytoplasmic                                       | 804.68  | 35.27 | 46674  | 14 | 0.00297626 | 2.12810284 | 0.00825953 | 1.93935448 | 0.02018182 | 1.72393153 |
| Q9Z2Y8 | Plpbp   | Pyridoxal phosphate homeostasis protein                                           | 82.71   | 4.74  | 30049  | 1  | 0.01910448 | 3.34310623 | 0.00310046 | 4.2883222  | 0.02019238 | 3.72675389 |
| Q8BMA6 | Srp68   | Signal recognition particle subunit SRP68                                         | 165.72  | 6.72  | 70574  | 3  | 0.00033855 | 1.88335488 | 0.0203037  | 1.50378622 | 0.00669376 | 1.46670078 |
| P08030 | Aprt    | Adenine phosphoribosyltransferase                                                 | 923.16  | 78.89 | 19724  | 14 | 0.02040937 | 1.85381064 | 0.01227667 | 1.79366531 | 0.01384766 | 1.68824455 |
| P62843 | Rps15   | 40S ribosomal protein S15                                                         | 323.18  | 39.31 | 17040  | 5  | 0.00174931 | 2.65549357 | 0.020456   | 2.03774884 | 0.00631697 | 2.28970388 |
| P80313 | Cct7    | T-complex protein 1 subunit eta                                                   | 2365.11 | 69.49 | 59652  | 36 | 0.00613542 | 1.79371213 | 0.0080474  | 1.73947852 | 0.02074624 | 1.60494262 |
| Q8R0H9 | Gga1    | ADP-ribosylation factor-binding protein GGA1                                      | 176.33  | 7.56  | 69972  | 4  | 0.00365921 | 2.41912544 | 0.00245565 | 2.51737435 | 0.02078925 | 1.96944561 |
| P51855 | Gss     | Glutathione synthetase                                                            | 236.54  | 14.14 | 52247  | 4  | 0.00111509 | 2.0950239  | 0.00333389 | 1.91726387 | 0.02093064 | 1.56120363 |
| Q99MD9 | Nasp    | Nuclear autoantigenic sperm protein                                               | 531.58  | 14.88 | 83954  | 7  | 0.02105134 | 1.63055917 | 0.00443536 | 1.90488985 | 0.00565787 | 1.86231024 |
| Q99KQ4 | Nampt   | Nicotinamide phosphoribosyltransferase                                            | 468.5   | 22.81 | 55447  | 9  | 0.00228495 | 3.02127711 | 0.0095988  | 2.38541165 | 0.02113686 | 2.15953189 |
| Q8K2I4 | Manba   | Beta-mannosidase                                                                  | 285.63  | 6.6   | 100831 | 6  | 0.00377655 | 3.89620192 | 0.00721638 | 3.07340391 | 0.02114637 | 2.58637776 |
| Q9WVA4 | Tagln2  | Transgelin-2                                                                      | 1756.11 | 79.4  | 22395  | 24 | 0.01591698 | 1.46577594 | 0.00210889 | 1.67197219 | 0.02116969 | 1.40823054 |
| Q9WUA2 | Farsb   | Phenylalanine--tRNA ligase beta subunit                                           | 563.32  | 21.9  | 65697  | 12 | 0.01407065 | 1.63949902 | 0.01028005 | 1.69248441 | 0.02127068 | 1.55805299 |
| Q9Z0S1 | Bpnt1   | 3'(2'),5'-bisphosphate nucleotidase 1                                             | 407.94  | 30.19 | 33196  | 7  | 0.01681864 | 2.21436274 | 0.02143726 | 2.10314073 | 0.01921319 | 2.15883069 |
| P0C0A1 | Vps25   | Vacuolar protein-sorting-associated protein 25                                    | 121.19  | 21.02 | 20762  | 3  | 0.00042836 | 1.93622525 | 0.00249991 | 2.18546916 | 0.02151336 | 2.21987222 |

|        |          |                                                              |         |       |        |    |            |            |            |            |            |            |
|--------|----------|--------------------------------------------------------------|---------|-------|--------|----|------------|------------|------------|------------|------------|------------|
| Q8VBT6 | Apobr    | Apolipoprotein B receptor                                    | 546.98  | 14.65 | 102705 | 12 | 0.00726428 | 1.75178986 | 0.02159432 | 1.60301839 | 0.01571384 | 1.62228704 |
| Q6P8X1 | Snx6     | Sorting nexin-6                                              | 187.77  | 15.02 | 46649  | 4  | 0.02179279 | 2.64103636 | 0.00245634 | 2.5573875  | 0.00984359 | 2.21288145 |
| Q91YR9 | Ptgr1    | Prostaglandin reductase 1                                    | 402.74  | 27.36 | 35560  | 8  | 0.00049085 | 2.60948212 | 0.00868969 | 1.91291091 | 0.02186233 | 1.74016559 |
| Q921M7 | Fam49b   | Protein FAM49B                                               | 700.82  | 35.49 | 36776  | 11 | 0.01431855 | 1.75724807 | 0.01258085 | 1.75199264 | 0.02205364 | 1.66346916 |
| Q80U87 | Usp8     | Ubiquitin carboxyl-terminal hydrolase 8                      | 305.92  | 7.96  | 122611 | 7  | 0.01038526 | 1.98851831 | 0.00654616 | 2.05181481 | 0.02209117 | 1.80719322 |
| P62482 | Kcnab2   | Voltage-gated potassium channel subunit beta-2               | 227.05  | 22.62 | 41021  | 5  | 0.00263218 | 3.19421431 | 0.00563724 | 2.82678233 | 0.02226025 | 2.33339684 |
| Q62348 | Tsn      | Translin                                                     | 380.23  | 31.14 | 26201  | 7  | 0.0222828  | 1.71803743 | 0.00302405 | 2.02021335 | 0.01062554 | 1.78304869 |
| O54940 | Bnip2    | BCL2/adenovirus E1B 19 kDa protein-interacting protein 2     | 69.71   | 7.67  | 37769  | 2  | 0.02238415 | 1.91530514 | 0.00666301 | 2.28902636 | 0.0191228  | 1.95313972 |
| P80317 | Cct6a    | T-complex protein 1 subunit zeta                             | 1456.67 | 53.3  | 58004  | 26 | 0.00881098 | 1.62161497 | 0.00807926 | 1.61717316 | 0.02240464 | 1.47400785 |
| Q62448 | Eif4g2   | Eukaryotic translation initiation factor 4 gamma 2           | 512.45  | 14.68 | 102106 | 10 | 0.00983686 | 1.94889311 | 0.02252496 | 1.78972125 | 0.01028153 | 1.92954784 |
| Q9CQ75 | Ndufa2   | NADH dehydrogenase [ubiquinone] 1 alpha subcomplex subunit 2 | 75.5    | 14.14 | 10916  | 1  | 6.4274E-05 | 0.54986125 | 0.00246301 | 0.77002219 | 0.02272733 | 0.85793421 |
| Q9ERK4 | Cse1l    | Exportin-2                                                   | 802.11  | 18.54 | 110455 | 15 | 0.00698213 | 2.79270048 | 0.00789034 | 1.54449041 | 0.02273709 | 1.42079041 |
| Q03265 | Atp5f1a  | ATP synthase subunit alpha, mitochondrial                    | 2770.93 | 62.39 | 59753  | 40 | 0.023085   | 0.79802334 | 0.00297033 | 0.67760753 | 0.01852161 | 0.80316051 |
| P24155 | Thop1    | Thimet oligopeptidase                                        | 192.1   | 5.53  | 78385  | 4  | 0.00927121 | 2.92439622 | 0.01012575 | 2.77871981 | 0.02328128 | 2.46475306 |
| Q9WUM4 | Coro1c   | Coronin-1C                                                   | 861.13  | 36.08 | 53121  | 13 | 4.791E-05  | 1.87862627 | 0.00161111 | 1.47205383 | 0.02335657 | 1.27143632 |
| Q3THS6 | Mat2a    | S-adenosylmethionine synthase isoform type-2                 | 561.82  | 31.9  | 43689  | 12 | 0.00743236 | 2.05894028 | 0.02359826 | 1.78548524 | 0.01270424 | 1.9405132  |
| P22509 | Fbl      | rRNA 2'-O-methyltransferase fibrillarin                      | 918.82  | 58.1  | 34222  | 16 | 0.00556789 | 0.51812812 | 0.00958939 | 0.58978314 | 0.02361586 | 0.67461054 |
| Q7TQH0 | Atxn2l   | Ataxin-2-like protein                                        | 476.95  | 12.2  | 110649 | 9  | 0.02367249 | 1.68172305 | 0.00467551 | 2.03439096 | 0.00452857 | 2.00516972 |
| Q9D662 | Sec23b   | Protein transport protein Sec23B                             | 697.68  | 21.51 | 86437  | 11 | 0.00573604 | 1.65128942 | 0.01500205 | 1.52518487 | 0.02367749 | 1.45807484 |
| Q91YJ3 | Thyn1    | Thymocyte nuclear protein 1                                  | 78.47   | 6.64  | 26178  | 2  | 0.01829602 | 2.22878817 | 0.00907211 | 2.50987416 | 0.02434082 | 2.15513556 |
| P27612 | Plaa     | Phospholipase A-2-activating protein                         | 554.38  | 17.76 | 87221  | 10 | 0.00699567 | 2.30887631 | 0.00971758 | 2.20197639 | 0.0244399  | 1.97738065 |
| P0C0A2 | Vps36    | Vacuolar protein-sorting-associated protein 36               | 173.53  | 11.14 | 43718  | 4  | 0.0245385  | 2.09247278 | 0.01082761 | 1.77229739 | 0.00583723 | 1.88201853 |
| Q8R3C0 | Mcmbp    | Mini-chromosome maintenance complex-binding protein          | 370.98  | 17.45 | 72891  | 7  | 0.02455498 | 1.76461179 | 0.00064883 | 2.26161631 | 0.00128187 | 2.11301557 |
| P04256 | Hnrnpa1  | Heterogeneous nuclear ribonucleoprotein A1                   | 1476.03 | 55.31 | 34212  | 21 | 0.00553341 | 0.57075028 | 0.01747623 | 0.68097114 | 0.02476358 | 0.70446812 |
| Q9CRB9 | Chchd3   | MICOS complex subunit Mic19                                  | 349.08  | 19.82 | 26335  | 6  | 0.02477653 | 0.73182971 | 0.01033072 | 0.69387607 | 0.01990358 | 0.74677104 |
| Q8BH43 | Wasf2    | Wiskott-Aldrich syndrome protein family member 2             | 243.43  | 10.66 | 54074  | 4  | 0.02479965 | 1.64335568 | 0.0141539  | 1.76279647 | 0.02319507 | 1.63956364 |
| P51807 | Dynl1    | Dynein light chain Tctex-type 1                              | 61.35   | 15.93 | 12483  | 1  | 0.0203321  | 7.64231856 | 0.01506194 | 17.7155665 | 0.02487123 | 9.54979849 |
| P43275 | Hist1h1a | Histone H1.1                                                 | 511.19  | 36.15 | 21785  | 9  | 0.00899657 | 0.54657376 | 0.01061498 | 0.55716017 | 0.02492405 | 0.64936396 |
| Q9JLT4 | Txnr2    | Thioredoxin reductase 2, mitochondrial                       | 176.76  | 5.15  | 56603  | 2  | 0.00107655 | 2.67792653 | 0.01858993 | 1.47283462 | 0.02494514 | 1.43157569 |
| Q9CRC8 | Lrrc40   | Leucine-rich repeat-containing protein 40                    | 133.78  | 4.32  | 68076  | 2  | 0.017739   | 2.08485868 | 0.0137397  | 2.19980219 | 0.02501882 | 1.98221815 |
| P26638 | Sars     | Serine--tRNA ligase, cytoplasmic                             | 726.71  | 29.69 | 58389  | 14 | 0.00143947 | 2.23433598 | 0.00955815 | 1.81522605 | 0.02567245 | 1.62111582 |
| P51859 | Hdgf     | Hepatoma-derived growth factor                               | 430.74  | 49.37 | 26269  | 8  | 0.007835   | 1.62608083 | 0.01427802 | 1.53840245 | 0.02571553 | 1.46526639 |
| Q8R2E9 | Ero1b    | ERO1-like protein beta                                       | 223.18  | 8.99  | 53518  | 4  | 0.02575067 | 2.36895812 | 0.0198256  | 2.31144143 | 0.02474293 | 2.25667638 |

|        |         |                                                                   |         |       |        |    |            |            |            |            |            |            |
|--------|---------|-------------------------------------------------------------------|---------|-------|--------|----|------------|------------|------------|------------|------------|------------|
| O70194 | Eif3d   | Eukaryotic translation initiation factor 3 subunit D              | 987.19  | 39.42 | 63989  | 16 | 0.02576396 | 1.59469095 | 0.00644004 | 1.84514978 | 0.00798843 | 1.80884568 |
| Q9DCD0 | Pgd     | 6-phosphogluconate dehydrogenase, decarboxylating                 | 1873.08 | 56.52 | 53247  | 26 | 0.01545419 | 1.52022219 | 0.0061289  | 1.63372804 | 0.02581678 | 1.46010803 |
| P18654 | Rps6ka3 | Ribosomal protein S6 kinase alpha-3                               | 78.01   | 2.57  | 83694  | 2  | 0.02269832 | 2.04322164 | 0.01834554 | 2.08062546 | 0.02584691 | 1.99303192 |
| Q6AYH5 | Dctn2   | Dynactin subunit 2                                                | 166.19  | 8.21  | 44148  | 3  | 0.02587724 | 4.18954422 | 0.00203875 | 4.57825432 | 0.00332793 | 3.28801946 |
| Q60864 | Stip1   | Stress-induced-phosphoprotein 1                                   | 1023.65 | 37.57 | 62582  | 19 | 0.02592044 | 1.57235119 | 0.0073792  | 1.7885527  | 0.01830062 | 1.62442215 |
| O88342 | Wdr1    | WD repeat-containing protein 1                                    | 1345.48 | 49.83 | 66407  | 20 | 0.00109779 | 2.06149052 | 0.01039161 | 1.64264009 | 0.02592046 | 1.51088301 |
| Q9CQX2 | Cyb5b   | Cytochrome b5 type B                                              | 95.89   | 15.75 | 16318  | 2  | 0.02075421 | 0.47104351 | 0.0055933  | 0.69418288 | 0.02596132 | 0.7857803  |
| Q91YR5 | Mettl13 | Methyltransferase-like protein 13                                 | 87.05   | 3.01  | 78757  | 2  | 0.00152169 | 3.33328474 | 0.00470925 | 2.4975636  | 0.02599988 | 2.1365429  |
| Q63468 | Prpsap1 | Phosphoribosyl pyrophosphate synthase-associated protein 1        | 397.12  | 25.84 | 39436  | 7  | 0.02607853 | 1.80693771 | 0.0050533  | 2.22854087 | 0.01865443 | 1.88603495 |
| P21708 | Mapk3   | Mitogen-activated protein kinase 3                                | 385.13  | 23.16 | 43081  | 9  | 0.00149636 | 2.24713392 | 0.02614598 | 1.61092082 | 0.0238451  | 1.62544307 |
| Q05816 | Fabp5   | Fatty acid-binding protein 5                                      | 1148.5  | 80    | 15137  | 16 | 0.00012907 | 3.1508602  | 0.01748774 | 1.8161267  | 0.02618138 | 1.73604111 |
| Q8R050 | Gspt1   | Eukaryotic peptide chain release factor GTP-binding subunit ERF3A | 416.34  | 21.7  | 68625  | 9  | 0.02168708 | 1.36202467 | 0.0262134  | 1.35544363 | 0.00801792 | 1.45358505 |
| Q9CPV4 | Glod4   | Glyoxalase domain-containing protein 4                            | 677.95  | 56.71 | 33317  | 16 | 0.00779255 | 2.2280222  | 0.00911942 | 2.00870778 | 0.02653183 | 1.77128063 |
| Q8BFT2 | Haus4   | HAUS augmin-like complex subunit 4                                | 40.47   | 7.16  | 42197  | 1  | 0.00228087 | 9.77083389 | 0.00060917 | 8.23616149 | 0.02658017 | 6.84280266 |
| Q02053 | Uba1    | Ubiquitin-like modifier-activating enzyme 1                       | 1796.89 | 34.5  | 117809 | 27 | 0.00209868 | 2.06682097 | 0.00490703 | 1.88356472 | 0.02665266 | 1.60087125 |
| Q9JL16 | Scly    | Selenocysteine lyase                                              | 153.62  | 15.97 | 47174  | 4  | 0.01032159 | 2.1785711  | 0.02449783 | 1.8818543  | 0.02666113 | 1.87909002 |
| Q0P5W1 | Vps8    | Vacuolar protein sorting-associated protein 8 homolog             | 37.15   | 0.49  | 161146 | 1  | 0.02395222 | 2.12453747 | 0.02673245 | 2.10042688 | 0.02453819 | 2.42493212 |
| O54747 | Pold1   | DNA polymerase delta catalytic subunit                            | 298.75  | 6.26  | 123601 | 7  | 0.00171009 | 2.23122762 | 0.00809476 | 1.8887157  | 0.02676927 | 1.77697325 |
| Q9WTP7 | Ak3     | GTP:AMP phosphotransferase AK3, mitochondrial                     | 259.55  | 31.72 | 25426  | 4  | 0.00046134 | 3.13276516 | 0.02691562 | 2.25021312 | 0.00327518 | 2.48598356 |
| P56383 | Atp5mc2 | ATP synthase F(0) complex subunit C2, mitochondrial               | 220.62  | 26.03 | 15476  | 2  | 0.02495472 | 0.03492645 | 0.02693479 | 0.05645733 | 0.02676338 | 0.05713911 |
| Q9Z0R6 | Itsn2   | Intersectin-2                                                     | 44.16   | 0.72  | 188908 | 1  | 0.01033173 | 2.76783894 | 0.02712908 | 2.39817546 | 0.01983257 | 2.51451294 |
| Q9D0I9 | Rars    | Arginine--tRNA ligase, cytoplasmic                                | 1329.99 | 40    | 75674  | 23 | 0.0014037  | 2.28704016 | 0.01906184 | 1.65611646 | 0.02723894 | 1.5974007  |
| Q80TY0 | Fnbp1   | Formin-binding protein 1                                          | 434.16  | 17.05 | 71344  | 8  | 0.02739869 | 2.53916906 | 0.0008792  | 2.74140269 | 0.0036831  | 2.39114342 |
| Q8BVY0 | Rsl1d1  | Ribosomal L1 domain-containing protein 1                          | 1118.56 | 40.71 | 50421  | 14 | 0.01085156 | 0.56861849 | 0.0170327  | 0.61137556 | 0.02740042 | 0.67178217 |
| Q9D7H3 | RtcA    | RNA 3'-terminal phosphate cyclase                                 | 185.8   | 12.02 | 39254  | 3  | 0.01219012 | 2.12236153 | 0.01548305 | 2.06913062 | 0.02757937 | 1.92512627 |
| P28740 | Kif2a   | Kinesin-like protein KIF2A                                        | 116.47  | 3.4   | 79756  | 2  | 0.02761306 | 2.45429703 | 0.02066024 | 2.90763025 | 0.0215449  | 2.67771205 |
| Q9JL18 | Sart3   | Squamous cell carcinoma antigen recognized by T-cells 3           | 366.2   | 9.88  | 109619 | 7  | 0.02288147 | 1.81526031 | 0.0219199  | 1.84836466 | 0.02765219 | 1.78668711 |
| Q8BKC5 | Ipo5    | Importin-5                                                        | 778.2   | 19.05 | 123591 | 14 | 0.00103119 | 2.29716036 | 0.00765254 | 1.74111687 | 0.02782527 | 1.67006497 |
| Q4KM73 | Cmpk1   | UMP-CMP kinase                                                    | 380.87  | 47.45 | 22169  | 8  | 0.02787168 | 1.43788524 | 6.1307E-05 | 2.01510611 | 0.00602171 | 1.63567625 |
| P53811 | Pitpnb  | Phosphatidylinositol transfer protein beta isoform                | 221.46  | 27.68 | 31487  | 6  | 0.01257108 | 1.96824696 | 0.02792894 | 1.84734165 | 0.01276518 | 1.97140375 |
| Q3V1V3 | Esf1    | ESF1 homolog                                                      | 48.98   | 1.42  | 98048  | 1  | 0.01055273 | 2.18722877 | 0.02794448 | 1.88440495 | 0.02223978 | 1.95910341 |
| P97369 | Ncf4    | Neutrophil cytosol factor 4                                       | 670.34  | 50.74 | 38707  | 12 | 0.00469536 | 1.29481554 | 0.02814651 | 1.27098724 | 0.01227834 | 1.24105181 |
| O88902 | Ptpn23  | Tyrosine-protein phosphatase non-receptor type 23                 | 87.02   | 1.73  | 163454 | 2  | 0.02444372 | 3.3556974  | 0.02817442 | 2.56206067 | 0.02458962 | 2.65945608 |
| Q9QYB1 | Clic4   | Chloride intracellular channel protein 4                          | 921.84  | 57.31 | 28729  | 13 | 0.0158789  | 1.99627491 | 0.00392684 | 2.08250765 | 0.02821028 | 1.68461814 |



|        |         |                                                                                 |         |       |        |    |            |            |            |            |            |            |
|--------|---------|---------------------------------------------------------------------------------|---------|-------|--------|----|------------|------------|------------|------------|------------|------------|
| P98078 | Dab2    | Disabled homolog 2                                                              | 1050.78 | 29.63 | 82312  | 15 | 0.02835007 | 1.513779   | 0.00603409 | 1.73381721 | 0.0131615  | 1.62052403 |
| P97930 | Dtymk   | Thymidylate kinase                                                              | 129.43  | 16.04 | 23915  | 3  | 0.02853903 | 2.63740429 | 0.01606885 | 2.83954051 | 0.01955781 | 2.75423001 |
| O35303 | Dnm1l   | Dynamin-1-like protein                                                          | 296.86  | 8.61  | 83908  | 6  | 0.00996664 | 2.26018515 | 0.01154429 | 2.30301187 | 0.02858712 | 1.98157394 |
| Q80X80 | C2cd2l  | Phospholipid transfer protein C2CD2L                                            | 53.79   | 1.42  | 76329  | 1  | 0.00386636 | 3.26660375 | 0.01959963 | 2.91523395 | 0.0287533  | 2.4369395  |
| Q8K2T1 | Nmral1  | NmrA-like family domain-containing protein 1                                    | 111.05  | 7.77  | 34376  | 3  | 0.02557357 | 2.31253356 | 0.01374884 | 2.53752836 | 0.02876229 | 2.28285862 |
| D3ZLZ7 | Impdh1  | Inosine-5'-monophosphate dehydrogenase 1                                        | 229.12  | 6.61  | 55293  | 4  | 0.00797383 | 2.38931879 | 0.02215604 | 2.06092452 | 0.02879207 | 1.99476559 |
| P53996 | Cnbp    | Cellular nucleic acid-binding protein                                           | 330.92  | 43.26 | 19592  | 6  | 0.02834141 | 1.49134195 | 0.02886572 | 1.59774735 | 0.00319163 | 1.78562024 |
| Q9Z1D1 | Eif3g   | Eukaryotic translation initiation factor 3 subunit G                            | 286.33  | 14.69 | 35638  | 5  | 0.02892087 | 1.65160598 | 0.00768709 | 1.52133001 | 0.00504867 | 1.73185838 |
| Q99JW2 | Acy1    | Aminoacylase-1                                                                  | 645.02  | 33.09 | 45781  | 9  | 0.01472537 | 1.79324325 | 0.01051971 | 1.81407272 | 0.02905433 | 1.63196116 |
| Q9JL35 | Hmgn5   | High mobility group nucleosome-binding domain-containing protein 5              | 149.55  | 10.1  | 45344  | 4  | 0.02527542 | 0.50740918 | 0.00807204 | 1.42439494 | 0.02915977 | 1.23901352 |
| Q8C0C7 | Farsa   | Phenylalanine--tRNA ligase alpha subunit                                        | 426.86  | 15.94 | 57599  | 9  | 0.02917258 | 1.60787486 | 0.00657947 | 1.87635883 | 0.01493252 | 1.7222437  |
| P28352 | Apex1   | DNA-(apurinic or apyrimidinic site) lyase                                       | 455.02  | 35.33 | 35490  | 7  | 0.02956896 | 1.34403452 | 0.00100195 | 1.55098555 | 0.00302843 | 1.44211409 |
| Q8CI33 | Cwf19l1 | CWF19-like protein 1                                                            | 80.37   | 5.4   | 60193  | 2  | 0.02319798 | 2.53810028 | 0.01021588 | 2.49364198 | 0.02959012 | 2.18078353 |
| Q07813 | Bax     | Apoptosis regulator BAX                                                         | 354.61  | 40.62 | 21395  | 5  | 0.00703195 | 1.53482362 | 0.02968716 | 1.56337712 | 0.01021255 | 1.4750221  |
| P70315 | Was     | Wiskott-Aldrich syndrome protein homolog                                        | 155.03  | 13.08 | 54192  | 3  | 0.02972752 | 1.89485362 | 0.01430815 | 2.08118404 | 0.02567498 | 1.92870939 |
| P84091 | Ap2m1   | AP-2 complex subunit mu                                                         | 534.71  | 31.26 | 49655  | 12 | 0.01998741 | 1.65306408 | 0.02985574 | 1.59249466 | 0.02986191 | 1.5861732  |
| Q9JMH6 | Txnrd1  | Thioredoxin reductase 1, cytoplasmic                                            | 1055.88 | 42.09 | 67084  | 15 | 0.00057595 | 2.31336997 | 0.00713241 | 1.84782982 | 0.02990972 | 1.56522259 |
| Q99K01 | Pdxcl   | Pyridoxal-dependent decarboxylase domain-containing protein 1                   | 76.39   | 2.8   | 87335  | 2  | 0.02999661 | 2.90676381 | 0.01900477 | 2.46196601 | 0.01928968 | 2.56004913 |
| Q5U211 | Snx3    | Sorting nexin-3                                                                 | 327.21  | 52.47 | 18762  | 6  | 0.03013961 | 1.43317384 | 0.00698745 | 1.62607385 | 0.01690616 | 1.49888259 |
| P10605 | Ctsb    | Cathepsin B                                                                     | 1457.13 | 63.72 | 37280  | 21 | 2.0479E-05 | 2.99719308 | 0.03018029 | 1.48687771 | 0.02411858 | 1.52592018 |
| Q6DGG1 | Abhd14b | Protein ABHD14B                                                                 | 72.93   | 10    | 22618  | 2  | 0.02615834 | 3.04490544 | 0.01113292 | 3.51425695 | 0.03036058 | 3.00677212 |
| Q99JF8 | Psip1   | PC4 and SFRS1-interacting protein                                               | 373.52  | 17.23 | 59697  | 7  | 0.00047579 | 0.72216714 | 0.03046361 | 0.80850161 | 0.02109551 | 0.83723915 |
| Q8BFQ8 | Gatd1   | Glutamine amidotransferase-like class 1 domain-containing protein 1             | 117.08  | 10.45 | 23277  | 2  | 0.03049839 | 1.95600172 | 0.0085287  | 2.29092412 | 0.02719874 | 2.00893158 |
| Q8R5A3 | Apbb1ip | Amyloid beta A4 precursor protein-binding family B member 1-interacting protein | 68.3    | 5.07  | 74319  | 2  | 0.03086109 | 3.78145633 | 0.0168605  | 4.2251539  | 0.01409451 | 4.37019467 |
| Q3TIV5 | Zc3h15  | Zinc finger CCCH domain-containing protein 15                                   | 188.14  | 8.22  | 48327  | 3  | 0.03092117 | 1.60340225 | 0.02610916 | 1.63019419 | 0.02483894 | 1.63466191 |
| Q9JHW2 | Nit2    | Omega-amidase NIT2                                                              | 523.68  | 35.87 | 30502  | 8  | 0.00300599 | 2.54664086 | 0.01248529 | 2.12730001 | 0.03127174 | 1.89235957 |
| Q3UQ44 | Iqgap2  | Ras GTPase-activating-like protein IQGAP2                                       | 100.96  | 1.14  | 180528 | 2  | 0.01107308 | 2.46881522 | 0.01327023 | 1.69969628 | 0.03140823 | 1.54440104 |
| Q9QUJ7 | Acsl4   | Long-chain-fatty-acid--CoA ligase 4                                             | 825.24  | 29.68 | 79077  | 16 | 0.00733325 | 1.63895862 | 0.02011737 | 1.47813783 | 0.03143998 | 1.42283008 |
| Q6PAR5 | Gapvd1  | GTPase-activating protein and VPS9 domain-containing protein 1                  | 154.87  | 3.02  | 162402 | 3  | 0.01937989 | 3.31629416 | 0.00102121 | 3.30095853 | 0.03161005 | 2.3527487  |
| P39749 | Fen1    | Flap endonuclease 1                                                             | 554.75  | 21.43 | 42315  | 9  | 0.03165576 | 1.41058337 | 0.00186412 | 1.79222631 | 0.00278405 | 1.64896842 |
| P53534 | Pygb    | Glycogen phosphorylase, brain form                                              | 585.22  | 16.71 | 96174  | 10 | 0.00067332 | 2.75619703 | 0.00741779 | 1.97380091 | 0.03167476 | 1.67080699 |

|        |          |                                                                        |         |       |        |    |            |            |            |            |            |            |
|--------|----------|------------------------------------------------------------------------|---------|-------|--------|----|------------|------------|------------|------------|------------|------------|
| Q9ERS5 | Plekha2  | Pleckstrin homology domain-containing family A member 2                | 91.66   | 5.65  | 47380  | 2  | 0.01513436 | 2.48156028 | 0.03180204 | 2.00530654 | 0.02074058 | 2.19334537 |
| Q9D8N0 | Eef1g    | Elongation factor 1-gamma                                              | 1473.49 | 69.57 | 50061  | 24 | 0.03189915 | 1.34002173 | 0.00377747 | 1.57401246 | 0.00551659 | 1.51320451 |
| Q9D906 | Atg7     | Ubiquitin-like modifier-activating enzyme ATG7                         | 277.77  | 13.47 | 77520  | 7  | 0.00155614 | 2.74976396 | 0.02274053 | 2.07666246 | 0.03198312 | 1.95449299 |
| Q8VD75 | Hip1     | Huntingtin-interacting protein 1                                       | 62.6    | 1.65  | 115202 | 1  | 0.03063469 | 4.19969695 | 0.01118964 | 5.31449526 | 0.03203105 | 4.1385218  |
| O09131 | Gsto1    | Glutathione S-transferase omega-1                                      | 84.83   | 7.92  | 27498  | 2  | 0.01124545 | 2.38148677 | 0.01269984 | 2.35357993 | 0.03203408 | 2.00621172 |
| Q4AEF8 | Copg1    | Coatomer subunit gamma-1                                               | 709.58  | 20.02 | 97614  | 12 | 0.00490394 | 2.22834477 | 0.02087532 | 1.83385605 | 0.03220122 | 1.75184592 |
| P80318 | Cct3     | T-complex protein 1 subunit gamma                                      | 1368.41 | 40.92 | 60630  | 24 | 0.02494954 | 1.602542   | 0.02316399 | 1.61826474 | 0.03225362 | 1.55349957 |
| Q9EPB4 | Pycard   | Apoptosis-associated speck-like protein containing a CARD              | 168.67  | 25.39 | 21459  | 3  | 0.03232989 | 1.98337564 | 0.00675571 | 2.52268986 | 0.00608977 | 2.29609569 |
| P62715 | Ppp2cb   | Serine/threonine-protein phosphatase 2A catalytic subunit beta isoform | 493.98  | 33.33 | 35575  | 9  | 0.02554984 | 1.71768905 | 0.01414021 | 1.85720761 | 0.03233938 | 1.68238655 |
| B2RXC1 | Trappc11 | Trafficking protein particle complex subunit 11                        | 47.95   | 0.79  | 128396 | 1  | 0.01158165 | 3.67539798 | 0.01586301 | 3.31444746 | 0.03235666 | 2.92188254 |
| Q9D7X3 | Dusp3    | Dual specificity protein phosphatase 3                                 | 600.66  | 59.46 | 20472  | 10 | 0.03236122 | 1.52825599 | 0.01453617 | 1.65690639 | 0.03110593 | 1.5601306  |
| Q99K85 | Psat1    | Phosphoserine aminotransferase                                         | 1514.64 | 60.27 | 40473  | 25 | 0.03240678 | 1.71207157 | 0.01850544 | 1.8170888  | 0.02742656 | 1.73610321 |
| P61750 | Arf4     | ADP-ribosylation factor 4                                              | 645.19  | 47.22 | 20397  | 9  | 0.00412807 | 1.76858598 | 0.03252268 | 1.46779995 | 0.00328631 | 1.9458076  |
| Q569Z6 | Thrap3   | Thyroid hormone receptor-associated protein 3                          | 312.61  | 9.25  | 108178 | 6  | 0.02748633 | 0.52883361 | 0.0232733  | 0.50489851 | 0.03256746 | 0.55125339 |
| Q8K298 | Anln     | Anillin                                                                | 413.93  | 10.17 | 122794 | 7  | 0.03257044 | 1.69697771 | 0.00454052 | 2.03699755 | 0.00397209 | 1.99343935 |
| P97371 | Psme1    | Proteasome activator complex subunit 1                                 | 295.29  | 24.9  | 28673  | 5  | 0.03262202 | 3.19165899 | 0.00101359 | 3.28665246 | 0.00279131 | 3.02589185 |
| Q8BMP6 | Acbd3    | Golgi resident protein GCP60                                           | 395.69  | 20.76 | 60181  | 7  | 0.00724925 | 3.0110474  | 0.02897764 | 2.35181742 | 0.03279109 | 2.26976933 |
| Q6AYA1 | Gar1     | H/ACA ribonucleoprotein complex subunit 1                              | 104.08  | 9.73  | 23011  | 2  | 0.01487469 | 0.50046505 | 0.03295576 | 0.60757817 | 0.02443859 | 0.57667368 |
| P04692 | Tpm1     | Tropomyosin alpha-1 chain                                              | 379.17  | 16.9  | 32681  | 7  | 0.02640114 | 2.43778701 | 0.01614003 | 2.10337603 | 0.03299187 | 1.89836652 |
| Q68FH4 | Galk2    | N-acetylgalactosamine kinase                                           | 108.72  | 5.02  | 50503  | 2  | 0.00091134 | 2.83970106 | 0.03300472 | 1.88578266 | 0.02396572 | 1.92862257 |
| Q9DAR7 | Dcps     | m7GpppX diphosphatase                                                  | 448.69  | 35.5  | 38988  | 9  | 0.03304333 | 1.95285444 | 0.01939035 | 2.11271681 | 0.02539074 | 2.04718891 |
| P23116 | Eif3a    | Eukaryotic translation initiation factor 3 subunit A                   | 910.71  | 14.21 | 161936 | 19 | 0.00020487 | 2.20640573 | 0.03316074 | 1.40494163 | 0.01818073 | 1.49489702 |
| Q80X41 | Vrk1     | Serine/threonine-protein kinase VRK1                                   | 203.91  | 16.82 | 49741  | 4  | 0.01386292 | 1.69121135 | 0.03323877 | 1.54397168 | 0.03303116 | 1.52225371 |
| P49718 | Mcm5     | DNA replication licensing factor MCM5                                  | 1088.75 | 30.97 | 82343  | 22 | 0.02021719 | 1.35439576 | 0.03337235 | 1.32663044 | 0.02876108 | 1.32694993 |
| Q62048 | Pea15    | Astrocytic phosphoprotein PEA-15                                       | 156.7   | 16.92 | 15054  | 3  | 0.00332339 | 4.70052465 | 0.03345378 | 3.24375799 | 0.01854606 | 3.39020857 |
| Q8C0L6 | Paox     | Peroxisomal N(1)-acetyl-spermine/spermidine oxidase                    | 82.37   | 3.17  | 55447  | 1  | 0.03364952 | 2.5670389  | 0.02364806 | 2.49629956 | 0.01609777 | 2.59070652 |
| Q5XJY5 | Arcn1    | Coatomer subunit delta                                                 | 892.83  | 36.01 | 57229  | 18 | 0.02753361 | 1.50215053 | 0.01758785 | 1.57170575 | 0.03381315 | 1.47567564 |
| P49962 | Srp9     | Signal recognition particle 9 kDa protein                              | 44.99   | 12.79 | 10194  | 1  | 0.00094136 | 5.60311029 | 0.00024891 | 4.88468117 | 0.03382904 | 4.09627394 |
| Q922Q8 | Lrrc59   | Leucine-rich repeat-containing protein 59                              | 315.59  | 36.81 | 34877  | 7  | 0.01667011 | 1.78825333 | 0.01555039 | 1.54062892 | 0.03384204 | 1.55137995 |
| Q6P9P6 | Kif11    | Kinesin-like protein KIF11                                             | 112.39  | 3.99  | 118027 | 3  | 0.03385794 | 1.92335581 | 0.00268442 | 2.54029491 | 0.00686566 | 2.26332316 |
| P60517 | Gabarap  | Gamma-aminobutyric acid receptor-associated protein                    | 186.83  | 21.37 | 13918  | 3  | 0.02510424 | 1.84957362 | 0.03391111 | 1.7130242  | 0.02417201 | 1.81874297 |
| Q6P9R2 | Oxsr1    | Serine/threonine-protein kinase OSR1                                   | 41.43   | 1.52  | 58214  | 1  | 0.03410695 | 1.99127624 | 0.00835677 | 2.44078635 | 0.01021707 | 2.3380876  |

|        |          |                                                                  |         |       |        |    |            |            |            |            |            |            |
|--------|----------|------------------------------------------------------------------|---------|-------|--------|----|------------|------------|------------|------------|------------|------------|
| Q4G009 | Mcts1    | Malignant T-cell-amplified sequence 1                            | 121.98  | 10.44 | 20550  | 1  | 0.0023828  | 13.9927819 | 0.03440864 | 10.8786286 | 0.00039476 | 10.3651978 |
| P61222 | Abce1    | ATP-binding cassette sub-family E member 1                       | 1040.79 | 34.89 | 67314  | 16 | 0.0344203  | 1.67962367 | 0.01855876 | 1.79291047 | 0.02765818 | 1.72464744 |
| Q62384 | Zpr1     | Zinc finger protein ZPR1                                         | 148.03  | 7.63  | 50715  | 3  | 0.02504749 | 1.55288962 | 0.00200199 | 1.94646891 | 0.03467827 | 1.58293665 |
| Q9CWP6 | Mospd2   | Motile sperm domain-containing protein 2                         | 103.84  | 3.47  | 59855  | 2  | 0.00484372 | 2.42637039 | 0.01197965 | 2.15775567 | 0.034681   | 2.06755492 |
| P68181 | Prkacb   | cAMP-dependent protein kinase catalytic subunit beta             | 261.26  | 16.24 | 40708  | 5  | 0.00053281 | 3.1200536  | 0.03482485 | 1.85278755 | 0.02755713 | 1.92354936 |
| Q9DCH4 | Eif3f    | Eukaryotic translation initiation factor 3 subunit F             | 516.21  | 24.93 | 37984  | 8  | 0.0348276  | 1.39231244 | 0.01311286 | 1.48395965 | 0.0145969  | 1.47717062 |
| Q9Z1G3 | Atp6v1c1 | V-type proton ATPase subunit C 1                                 | 516.22  | 26.18 | 43888  | 9  | 0.00100687 | 3.77436925 | 0.00043125 | 2.47400422 | 0.03492681 | 1.67990873 |
| Q8JZY2 | Commd10  | COMM domain-containing protein 10                                | 42.59   | 5.94  | 22812  | 1  | 0.00193122 | 7.19970388 | 0.00145113 | 7.21872514 | 0.03498156 | 5.73667926 |
| Q78PY7 | Snd1     | Staphylococcal nuclease domain-containing protein 1              | 2541.63 | 56.15 | 102088 | 42 | 0.03513285 | 1.30835456 | 0.00681769 | 1.46504178 | 0.01536156 | 1.39505751 |
| O88447 | Klc1     | Kinesin light chain 1                                            | 104.17  | 4.44  | 61450  | 2  | 0.01298295 | 2.19436592 | 0.03356468 | 1.92050885 | 0.03520995 | 1.90638956 |
| Q5U2Q3 |          | Ester hydrolase C11orf54 homolog                                 | 54.76   | 8.89  | 34993  | 2  | 0.00270843 | 4.05774483 | 0.0036853  | 3.5502903  | 0.03527855 | 2.51502304 |
| P51432 | Plcb3    | 1-phosphatidylinositol 4,5-bisphosphate phosphodiesterase beta-3 | 298.04  | 7.46  | 139487 | 6  | 0.00581496 | 1.62950908 | 0.00984982 | 1.5697995  | 0.03537489 | 1.38812528 |
| Q6WVG3 | Kctd12   | BTB/POZ domain-containing protein KCTD12                         | 561.19  | 42.2  | 35892  | 9  | 0.00481228 | 1.70037067 | 0.00778501 | 1.62230335 | 0.03538933 | 1.41385112 |
| Q924C1 | Xpo5     | Exportin-5                                                       | 293.84  | 6.64  | 136973 | 6  | 0.00031783 | 4.7852063  | 0.00081399 | 4.16114196 | 0.03542043 | 3.19264384 |
| Q9QZ88 | Vps29    | Vacuolar protein sorting-associated protein 29                   | 200.28  | 37.36 | 20496  | 5  | 0.01554225 | 2.23149234 | 0.03544596 | 1.98174118 | 0.02849725 | 2.04685737 |
| P50247 | Ahcy     | Adenosylhomocysteinase                                           | 1277.03 | 48.15 | 47688  | 19 | 0.00865937 | 1.81062348 | 0.01084522 | 1.73920659 | 0.03561447 | 1.53885752 |
| Q9CZY3 | Ube2v1   | Ubiquitin-conjugating enzyme E2 variant 1                        | 398.85  | 36.05 | 16355  | 7  | 0.03562241 | 1.37253271 | 0.0002751  | 1.97070951 | 0.00319165 | 1.69286413 |
| Q4QQR9 | Memo1    | Protein MEMO1                                                    | 49.26   | 4.71  | 33679  | 1  | 0.02793829 | 2.69034494 | 0.03578646 | 2.68119828 | 0.01007878 | 2.76798191 |
| P97834 | Gps1     | COP9 signalosome complex subunit 1                               | 267.39  | 15.07 | 53428  | 6  | 0.02776538 | 1.66369159 | 0.00278338 | 1.88325713 | 0.03579633 | 1.55629145 |
| Q6MG61 | Clic1    | Chloride intracellular channel protein 1                         | 1265.48 | 61.41 | 26981  | 19 | 0.03330939 | 1.5954734  | 0.01102953 | 1.80366427 | 0.03583151 | 1.57434316 |
| A2AN08 | Ubr4     | E3 ubiquitin-protein ligase UBR4                                 | 309.76  | 1.31  | 572290 | 5  | 0.00379788 | 2.69392161 | 0.00410482 | 2.62825525 | 0.03628783 | 2.21989244 |
| O35142 | Copb2    | Coatomer subunit beta'                                           | 807.7   | 26.52 | 102551 | 15 | 0.03646716 | 1.57487994 | 0.0175581  | 1.68256182 | 0.02818023 | 1.60655784 |
| Q01405 | Sec23a   | Protein transport protein Sec23A                                 | 220.37  | 8.89  | 86162  | 4  | 0.00504031 | 2.80340493 | 0.01665716 | 2.37215928 | 0.03668994 | 2.10304789 |
| Q5M823 | Nudcd2   | NudC domain-containing protein 2                                 | 356.7   | 43.95 | 17674  | 6  | 0.03673043 | 1.49592356 | 0.00560284 | 1.82210844 | 0.00934993 | 1.70521178 |
| P12368 | Prkar2a  | cAMP-dependent protein kinase type II-alpha regulatory subunit   | 251.98  | 12.97 | 45480  | 4  | 0.0076977  | 2.19849552 | 0.03686259 | 1.80877584 | 0.02724734 | 1.90179655 |
| Q505F5 | Lrrc47   | Leucine-rich repeat-containing protein 47                        | 210.41  | 12.39 | 63590  | 5  | 0.0368914  | 1.43892369 | 0.00918532 | 1.7244512  | 0.01911416 | 1.51930946 |
| O70551 | Srpk1    | SRSF protein kinase 1                                            | 288.67  | 11.27 | 73088  | 5  | 0.03694438 | 1.39154269 | 0.01120884 | 1.50903915 | 0.00998488 | 1.5639052  |
| Q8VBV7 | Cops8    | COP9 signalosome complex subunit 8                               | 216.54  | 29.67 | 23256  | 4  | 0.0137117  | 2.06696369 | 0.03735951 | 1.7985526  | 0.03208029 | 1.83769242 |
| Q8CIN4 | Pak2     | Serine/threonine-protein kinase PAK 2                            | 936.55  | 36.45 | 57930  | 14 | 0.03739615 | 1.62742915 | 0.02283569 | 1.72904564 | 0.03178667 | 1.67245612 |
| Q64514 | Tpp2     | Tripeptidyl-peptidase 2                                          | 987.35  | 24.25 | 139879 | 19 | 0.0190834  | 1.7309961  | 0.01032464 | 1.85295568 | 0.03752324 | 1.60162751 |
| Q9WVA3 | Bub3     | Mitotic checkpoint protein BUB3                                  | 519.29  | 29.45 | 36955  | 9  | 0.03758294 | 1.16280411 | 0.00548172 | 1.32025427 | 0.00950476 | 1.2498106  |
| P62959 | Hint1    | Histidine triad nucleotide-binding protein 1                     | 189.29  | 42.06 | 13777  | 4  | 0.03772266 | 1.96953401 | 0.00718104 | 2.4649992  | 0.01896049 | 2.1588903  |

|        |          |                                                               |         |       |        |    |            |            |            |            |            |            |
|--------|----------|---------------------------------------------------------------|---------|-------|--------|----|------------|------------|------------|------------|------------|------------|
| Q9D338 | Mrpl19   | 39S ribosomal protein L19, mitochondrial                      | 249.54  | 15.07 | 33578  | 5  | 0.00219165 | 0.62928712 | 0.00472933 | 0.66682781 | 0.03790645 | 0.80445381 |
| Q9CWU9 | Nup37    | Nucleoporin Nup37                                             | 133.98  | 10.12 | 36732  | 2  | 0.01648098 | 0.42865755 | 0.03795016 | 0.54609225 | 0.03087784 | 0.51583678 |
| P12382 | Pfkl     | ATP-dependent 6-phosphofructokinase, liver type               | 754.16  | 21.67 | 85360  | 13 | 0.01240803 | 1.67711805 | 0.01824917 | 1.58802836 | 0.03805607 | 1.47055124 |
| P47754 | Capza2   | F-actin-capping protein subunit alpha-2                       | 401.02  | 24.83 | 32967  | 7  | 0.00242873 | 1.96239845 | 0.00269612 | 1.66900955 | 0.03818559 | 1.40613416 |
| Q62698 | Dync1li2 | Cytoplasmic dynein 1 light intermediate chain 2               | 284.19  | 13.08 | 54745  | 5  | 0.00165954 | 1.93592489 | 0.01150579 | 1.6233118  | 0.03822907 | 1.45276705 |
| Q62393 | Tpd52    | Tumor protein D52                                             | 191.8   | 16.07 | 24313  | 3  | 0.00227854 | 2.79002527 | 0.02609633 | 1.98441487 | 0.03840087 | 1.88321012 |
| Q9WV85 | Nme3     | Nucleoside diphosphate kinase 3                               | 75.17   | 10.06 | 19099  | 1  | 0.00412503 | 3.29895788 | 0.03744537 | 2.27534707 | 0.0384134  | 2.28103686 |
| O35127 | Grec10   | Protein C10                                                   | 38.07   | 14.29 | 13194  | 1  | 0.03848278 | 8.19008198 | 0.0005245  | 12.1591855 | 0.02087886 | 10.3536615 |
| O08583 | Alyref   | THO complex subunit 4                                         | 441.15  | 47.06 | 26940  | 6  | 0.02467885 | 0.70762516 | 0.03853796 | 0.73920926 | 0.03264928 | 0.72969592 |
| Q3UMB9 | Washc4   | WASH complex subunit 4                                        | 106.43  | 1.11  | 136370 | 2  | 0.02172397 | 3.52350083 | 0.01893298 | 2.79761354 | 0.03858686 | 2.47275331 |
| B5DF89 | Cul3     | Cullin-3                                                      | 174.39  | 9.51  | 88932  | 4  | 0.00514582 | 4.58092308 | 0.01313269 | 3.3102099  | 0.03862098 | 2.82680425 |
| Q8BV14 | Qdpr     | Dihydropteridine reductase                                    | 199.9   | 26.56 | 25570  | 4  | 0.01029954 | 1.90806325 | 0.01711479 | 1.78978448 | 0.0386828  | 1.6321442  |
| O08553 | Dpysl2   | Dihydropyrimidinase-related protein 2                         | 1562.05 | 53.5  | 62278  | 23 | 0.00135738 | 1.43842065 | 0.00524517 | 1.31096077 | 0.03870129 | 1.19198161 |
| Q9D2R0 | Aacs     | Acetoacetyl-CoA synthetase                                    | 118.49  | 4.17  | 75200  | 3  | 0.00621554 | 2.28281804 | 0.03872101 | 1.80063754 | 0.0287363  | 1.86804921 |
| P32233 | Drg1     | Developmentally-regulated GTP-binding protein 1               | 303.57  | 16.08 | 40512  | 5  | 0.00659155 | 1.86633573 | 0.01646357 | 1.73057007 | 0.03923894 | 1.54857111 |
| Q91X52 | Dcxr     | L-xylulose reductase                                          | 44.07   | 4.51  | 25746  | 1  | 0.00790074 | 2.48875894 | 0.0091447  | 1.92331926 | 0.03955561 | 1.64170293 |
| P07356 | Anxa2    | Annexin A2                                                    | 1472.16 | 72.27 | 38676  | 26 | 0.00490676 | 1.408946   | 0.02266175 | 0.78347043 | 0.04012568 | 0.82489948 |
| P37996 | Arl3     | ADP-ribosylation factor-like protein 3                        | 191.8   | 25.82 | 20457  | 4  | 0.01430676 | 2.30452968 | 0.00277201 | 2.81685125 | 0.04021907 | 2.22176737 |
| Q8VCN5 | Cth      | Cystathionine gamma-lyase                                     | 407.83  | 22.61 | 43567  | 7  | 0.00031213 | 2.50249452 | 0.00700793 | 1.80907322 | 0.04028802 | 1.52873748 |
| Q62167 | Ddx3x    | ATP-dependent RNA helicase DDX3X                              | 1692.59 | 47.58 | 73101  | 27 | 0.0403282  | 1.25286044 | 0.00996668 | 1.35067254 | 0.00328671 | 1.44947427 |
| P54775 | Psmc4    | 26S proteasome regulatory subunit 6B                          | 397.47  | 23.92 | 47408  | 8  | 0.02589231 | 1.32897337 | 0.0408869  | 1.283073   | 0.02722925 | 1.31879254 |
| Q7M0E3 | Dstn     | Destrin                                                       | 579.56  | 56.36 | 18534  | 10 | 0.00302958 | 1.60938827 | 0.0033767  | 1.5984852  | 0.04117704 | 1.31975424 |
| Q8CGC7 | Eprs     | Bifunctional glutamate/proline--tRNA ligase                   | 2295.82 | 34.06 | 170079 | 37 | 0.00118517 | 1.52717134 | 0.01281153 | 1.31936742 | 0.04137631 | 1.23498104 |
| Q99K48 | Nono     | Non-POU domain-containing octamer-binding protein             | 1396.54 | 55.39 | 54541  | 25 | 0.04139219 | 0.75819945 | 0.02480958 | 0.72052812 | 0.03842278 | 0.7540708  |
| P70677 | Casp3    | Caspase-3                                                     | 354.9   | 25.63 | 31475  | 6  | 0.019862   | 1.72863752 | 0.02351185 | 1.68444416 | 0.04140357 | 1.58102025 |
| Q8BVE3 | Atp6v1h  | V-type proton ATPase subunit H                                | 268.1   | 13.04 | 55855  | 5  | 7.6532E-05 | 2.39097828 | 0.03434317 | 1.37942623 | 0.04146795 | 1.3666072  |
| Q91V12 | Acot7    | Cytosolic acyl coenzyme A thioester hydrolase                 | 406.28  | 29.66 | 42537  | 8  | 0.00408185 | 2.0363066  | 0.01304695 | 1.78420048 | 0.04156825 | 1.59083312 |
| D2XV59 | Gtpbp1   | GTP-binding protein 1                                         | 230.46  | 10.01 | 72489  | 5  | 0.04183858 | 1.88486314 | 0.0124351  | 2.29960298 | 0.01405486 | 2.18625803 |
| P35123 | Usp4     | Ubiquitin carboxyl-terminal hydrolase 4                       | 210.45  | 7.9   | 108343 | 5  | 0.00312159 | 2.99738262 | 0.04209273 | 2.35784899 | 0.00424737 | 2.89694595 |
| P21107 | Tpm3     | Tropomyosin alpha-3 chain                                     | 568.34  | 22.46 | 32994  | 10 | 0.02733401 | 1.98969991 | 0.0282618  | 1.9159598  | 0.04228981 | 1.81689497 |
| Q5FWK3 | Arhgap1  | Rho GTPase-activating protein 1                               | 140.86  | 7.06  | 50411  | 2  | 0.01685281 | 11.1369596 | 0.00270337 | 16.4619828 | 0.04229152 | 9.59707927 |
| Q00519 | Xdh      | Xanthine dehydrogenase/oxidase                                | 738.76  | 15.43 | 146562 | 13 | 0.00015012 | 3.23680502 | 0.0061936  | 1.74644935 | 0.04245798 | 1.35874068 |
| O35309 | Nmi      | N-myc-interactor                                              | 116.7   | 9.55  | 35236  | 2  | 0.04253335 | 1.70346164 | 0.00264707 | 2.08329381 | 0.00515331 | 1.98192659 |
| Q9CR95 | Necap1   | Adaptin ear-binding coat-associated protein 1                 | 132.55  | 17.45 | 29639  | 2  | 0.03013629 | 1.96537292 | 0.02223195 | 1.98034956 | 0.04261839 | 1.82446575 |
| Q9Z0P5 | Twf2     | Twinfilin-2                                                   | 386.7   | 32.95 | 39471  | 7  | 0.04269537 | 1.64708903 | 0.01501042 | 1.79281608 | 0.02647635 | 1.68991575 |
| Q9DBC7 | Prkar1a  | cAMP-dependent protein kinase type I-alpha regulatory subunit | 449.12  | 22.57 | 43185  | 8  | 4.9381E-05 | 2.06571075 | 0.00038663 | 1.63937819 | 0.04283384 | 1.46067522 |



|        |           |                                                              |         |       |        |    |            |            |            |            |            |            |
|--------|-----------|--------------------------------------------------------------|---------|-------|--------|----|------------|------------|------------|------------|------------|------------|
| Q5U2Q7 | Etf1      | Eukaryotic peptide chain release factor subunit 1            | 304.23  | 22.43 | 49031  | 6  | 0.04286367 | 1.34441247 | 0.00251615 | 1.68008915 | 0.00924098 | 1.52229636 |
| Q6NSR8 | Npepl1    | Probable aminopeptidase NPEPL1                               | 286.72  | 11.83 | 55940  | 5  | 0.00674902 | 2.70859917 | 0.01716453 | 2.30134053 | 0.04296953 | 2.031501   |
| Q9EPU0 | Upf1      | Regulator of nonsense transcripts 1                          | 1036.76 | 19.4  | 123967 | 21 | 0.04376353 | 1.45405509 | 0.01842643 | 1.57547892 | 0.02701764 | 1.52092804 |
| Q9CZ30 | Ola1      | Obg-like ATPase 1                                            | 564.72  | 28.03 | 44730  | 9  | 0.01069915 | 2.08774723 | 0.00776947 | 2.19304201 | 0.04379448 | 1.74518376 |
| Q9ER72 | Cars      | Cysteine--tRNA ligase, cytoplasmic                           | 507.15  | 14.56 | 94860  | 9  | 0.00992589 | 2.33597751 | 0.02188659 | 2.04807095 | 0.04383337 | 1.86471612 |
| P80316 | Cct5      | T-complex protein 1 subunit epsilon                          | 1538.34 | 51.2  | 59624  | 25 | 0.02545638 | 1.56915029 | 0.01708744 | 1.62515589 | 0.04387035 | 1.45922202 |
| Q9D706 | Rpap3     | RNA polymerase II-associated protein 3                       | 131.8   | 4.39  | 74096  | 2  | 0.04391325 | 2.20376233 | 0.03623854 | 2.25650373 | 0.04398423 | 2.18917422 |
| Q8R4Y8 | Rttm      | Rotatin                                                      | 42.11   | 0.31  | 248489 | 1  | 0.04408714 | 1.79529634 | 0.01557504 | 2.07710133 | 0.02544574 | 1.91509694 |
| Q09200 | B4galnt1  | Beta-1,4 N-acetylgalactosaminyltransferase 1                 | 113.11  | 9.94  | 59212  | 3  | 0.00660038 | 0.57383532 | 0.00520198 | 0.57649387 | 0.04420314 | 0.71887314 |
| P63036 | Dnaja1    | DnaJ homolog subfamily A member 1                            | 276.26  | 19.9  | 44868  | 6  | 0.04450916 | 1.81655888 | 0.01917993 | 2.03156081 | 0.00879353 | 2.2472844  |
| P84228 | Hist1h3b  | Histone H3.2                                                 | 804.84  | 61.76 | 15388  | 11 | 0.04447161 | 0.39996312 | 0.03185105 | 0.32791502 | 0.04458144 | 0.39974697 |
| Q3UM45 | Ppp1r7    | Protein phosphatase 1 regulatory subunit 7                   | 1027.28 | 55.12 | 41292  | 17 | 0.01864154 | 2.246219   | 0.02247962 | 2.17191552 | 0.04461091 | 1.95425902 |
| Q8BUM3 | Ptpn7     | Tyrosine-protein phosphatase non-receptor type 7             | 112.28  | 8.91  | 40351  | 2  | 0.0448619  | 2.68650473 | 0.00057152 | 3.38434311 | 0.02690104 | 2.45593036 |
| Q9Z2X2 | Psmd10    | 26S proteasome non-ATPase regulatory subunit 10              | 82.89   | 3.46  | 25084  | 1  | 0.01427506 | 3.52656052 | 0.04487895 | 2.83928713 | 0.02246421 | 3.19891758 |
| P17182 | Eno1      | Alpha-enolase                                                | 2960.96 | 79.26 | 47141  | 39 | 0.04508769 | 1.43658738 | 0.02331475 | 1.53084117 | 0.04291125 | 1.44789491 |
| Q91VD9 | Ndufs1    | NADH-ubiquinone oxidoreductase 75 kDa subunit, mitochondrial | 703.16  | 25.45 | 79777  | 15 | 0.01820928 | 0.8092941  | 0.00384501 | 0.73289326 | 0.04526031 | 0.84688518 |
| Q9CR00 | Psmd9     | 26S proteasome non-ATPase regulatory subunit 9               | 49.21   | 5.41  | 24720  | 1  | 0.04532657 | 2.75849161 | 0.0340702  | 2.93308186 | 0.02046598 | 3.19175454 |
| P30999 | Ctnnd1    | Catenin delta-1                                              | 200.81  | 6.18  | 104925 | 5  | 0.03626734 | 2.15984194 | 0.03076198 | 3.32916991 | 0.04534447 | 2.7489958  |
| Q9D2Y4 | Mlkl      | Mixed lineage kinase domain-like protein                     | 67.31   | 2.97  | 54317  | 1  | 0.02480055 | 1.85679304 | 0.03769801 | 1.75794588 | 0.0454153  | 1.72656748 |
| Q9CWJ9 | Atic      | Bifunctional purine biosynthesis protein PURH                | 2010.74 | 67.74 | 64217  | 32 | 0.04548552 | 1.50153227 | 0.01101045 | 1.7369973  | 0.02030211 | 1.63242602 |
| P70188 | Kifap3    | Kinesin-associated protein 3                                 | 42.04   | 2.52  | 91291  | 1  | 0.00248435 | 18.0613651 | 0.04613183 | 6.72135589 | 0.00922201 | 7.62473867 |
| D3ZBE5 | Nek7      | Serine/threonine-protein kinase Nek7                         | 60.98   | 7.95  | 34529  | 2  | 0.00374869 | 2.59616697 | 0.04616344 | 2.15346752 | 0.01269672 | 2.21630448 |
| Q9D2M8 | Ube2v2    | Ubiquitin-conjugating enzyme E2 variant 2                    | 408.32  | 41.38 | 16367  | 8  | 0.04619601 | 1.41152097 | 0.00053926 | 2.0664603  | 0.00380215 | 1.79617315 |
| Q6P6S4 | Sil1      | Nucleotide exchange factor SIL1                              | 49.28   | 1.72  | 52350  | 1  | 0.046246   | 2.565896   | 0.02429618 | 2.73368817 | 0.03705415 | 2.45725295 |
| P23514 | Copb1     | Coatomer subunit beta                                        | 657.7   | 17.52 | 107011 | 13 | 0.00894391 | 2.20636821 | 0.0432292  | 1.77929244 | 0.04642483 | 1.76206448 |
| O54988 | Slk       | STE20-like serine/threonine-protein kinase                   | 481.02  | 11.03 | 141457 | 9  | 0.04645911 | 1.50117884 | 0.01281353 | 1.69198294 | 0.01276802 | 1.72488125 |
| Q9JK81 | Myg1      | UPF0160 protein MYG1, mitochondrial                          | 436.13  | 21.32 | 42723  | 7  | 0.03072474 | 1.67905327 | 0.01689453 | 1.79718193 | 0.04646068 | 1.59114799 |
| Q9CQM9 | Glrx3     | Glutaredoxin-3                                               | 479.38  | 30.56 | 37778  | 8  | 0.00495524 | 1.7436533  | 0.00026678 | 2.03046773 | 0.04651796 | 1.38145029 |
| Q8K183 | Pdxk      | Pyridoxal kinase                                             | 258.76  | 17.31 | 35015  | 5  | 0.00889626 | 2.83510027 | 0.04510878 | 2.13307989 | 0.04673556 | 2.12218728 |
| P60521 | Gabarapl2 | Gamma-aminobutyric acid receptor-associated protein-like 2   | 179.61  | 36.75 | 13667  | 4  | 0.03921387 | 2.22170779 | 0.04685111 | 2.14044015 | 0.03580816 | 2.23080701 |
| Q9EQ80 | Nif311    | NIF3-like protein 1                                          | 368.02  | 19.95 | 41746  | 7  | 0.01674472 | 1.89863458 | 0.04688723 | 1.65869462 | 0.04655195 | 1.66672059 |
| Q4V7A6 | Phf10     | PHD finger protein 10                                        | 39.26   | 2.41  | 55884  | 1  | 0.03185501 | 2.99353673 | 0.0471534  | 2.15917081 | 0.00814992 | 2.35377681 |
| Q62418 | Dbnl      | Drebrin-like protein                                         | 700.57  | 32.34 | 48700  | 10 | 0.01682224 | 1.37300291 | 0.03040573 | 1.31533077 | 0.047234   | 1.30933304 |

|        |         |                                                                         |         |       |        |    |            |            |            |            |            |            |
|--------|---------|-------------------------------------------------------------------------|---------|-------|--------|----|------------|------------|------------|------------|------------|------------|
| P35564 | Canx    | Calnexin                                                                | 1249.29 | 39.09 | 67278  | 21 | 0.00607282 | 0.70920296 | 0.00902048 | 0.753786   | 0.04724129 | 0.83642015 |
| Q3TIU4 | Pde12   | 2',5'-phosphodiesterase 12                                              | 76.18   | 4.11  | 67514  | 2  | 0.04727068 | 2.04270056 | 0.03740219 | 2.11884319 | 0.04533644 | 2.05632319 |
| Q91YE6 | Ipo9    | Importin-9                                                              | 336.01  | 8.84  | 116052 | 7  | 0.01685411 | 1.82242043 | 0.00327989 | 1.63690602 | 0.04737175 | 1.52295377 |
| Q61210 | Arhgef1 | Rho guanine nucleotide exchange factor 1                                | 523.33  | 12.83 | 102805 | 9  | 0.04669278 | 1.27927069 | 0.04737774 | 1.28649875 | 0.04494501 | 1.30170203 |
| P70248 | Myo1f   | Unconventional myosin-I <sub>f</sub>                                    | 294.48  | 6.01  | 125947 | 7  | 0.00048511 | 2.78274901 | 0.01087168 | 1.61892479 | 0.04749891 | 1.5420117  |
| P54726 | Rad23a  | UV excision repair protein RAD23 homolog A                              | 282.73  | 20.66 | 39706  | 4  | 0.02078726 | 2.10686412 | 0.02281707 | 2.1050761  | 0.04754148 | 1.87093827 |
| P63328 | Ppp3ca  | Serine/threonine-protein phosphatase 2B catalytic subunit alpha isoform | 374.49  | 16.51 | 58644  | 7  | 0.00211905 | 2.04558791 | 0.00113029 | 1.94839832 | 0.04757993 | 1.48348555 |
| P53564 | Cux1    | Homeobox protein cut-like 1                                             | 56.26   | 0.59  | 165596 | 1  | 0.01806286 | 5.14078699 | 0.02222401 | 4.55228004 | 0.04781955 | 4.90156058 |
| Q9QY17 | Pacsin2 | Protein kinase C and casein kinase substrate in neurons 2 protein       | 164.27  | 8.4   | 55978  | 4  | 0.03278299 | 2.65403605 | 0.04814826 | 2.5481087  | 0.02948353 | 2.30109697 |
| D3ZZW6 | Hils1   | Spermatid-specific linker histone H1-like protein                       | 37.27   | 4.14  | 18617  | 1  | 0.00591348 | 2.68232286 | 0.00619043 | 2.68735178 | 0.04828504 | 1.97591675 |
| Q2L4X1 | Bzw2    | Basic leucine zipper and W2 domain-containing protein 2                 | 136.41  | 8.83  | 48063  | 3  | 0.04870979 | 1.38972401 | 0.00467761 | 1.65985865 | 0.0035787  | 1.75159308 |
| O54950 | Prkag1  | 5'-AMP-activated protein kinase subunit gamma-1                         | 155.82  | 13.33 | 37520  | 3  | 0.02267605 | 2.02648124 | 0.02594943 | 2.00884327 | 0.04873687 | 1.82003508 |
| Q3T114 | Prrc1   | Protein PRRC1                                                           | 65.9    | 2.93  | 46295  | 1  | 0.01471589 | 2.61174957 | 0.04883931 | 2.15295752 | 0.00842624 | 2.839727   |
| O88531 | Ppt1    | Palmitoyl-protein thioesterase 1                                        | 424.97  | 23.86 | 34490  | 6  | 0.00348864 | 1.9568391  | 0.03103069 | 1.52361431 | 0.04885753 | 1.45676124 |
| Q9CPS7 | Pno1    | RNA-binding protein PNO1                                                | 292.98  | 38.31 | 27454  | 7  | 0.00349394 | 2.11890905 | 0.04902705 | 1.55192702 | 0.04017384 | 1.59297504 |
| Q9CSU0 | Rprd1b  | Regulation of nuclear pre-mRNA domain-containing protein 1B             | 189.71  | 16.56 | 36884  | 4  | 0.04913131 | 1.73028017 | 0.00488359 | 1.66085243 | 0.00893427 | 1.57861466 |
| Q04447 | Ckb     | Creatine kinase B-type                                                  | 1790.38 | 66.4  | 42713  | 25 | 0.0491478  | 1.47892056 | 0.01004071 | 1.76684578 | 0.03959317 | 1.51347965 |
| P11440 | Cdk1    | Cyclin-dependent kinase 1                                               | 541.72  | 49.49 | 34107  | 12 | 0.04942752 | 1.76354296 | 0.0095037  | 2.17797979 | 0.01074166 | 2.15261071 |
| Q8R1B4 | Eif3c   | Eukaryotic translation initiation factor 3 subunit C                    | 910.54  | 18.22 | 105531 | 16 | 0.02649007 | 1.49482651 | 0.02962143 | 1.47350258 | 0.04958901 | 1.40682081 |
| O88685 | Psmc3   | 26S proteasome regulatory subunit 6A                                    | 957.78  | 43.89 | 49549  | 17 | 0.04965019 | 1.22943331 | 0.00152084 | 1.52752929 | 0.01287581 | 1.39083591 |
| Q62885 | Unc119  | Protein unc-119 homolog A                                               | 107.48  | 9.17  | 27048  | 2  | 0.04498137 | 2.14743468 | 0.03004954 | 2.28171108 | 0.04988146 | 2.1550637  |
| Q9D4H8 | Cul2    | Cullin-2                                                                | 49.27   | 1.74  | 86877  | 1  | 9.065E-05  | 8.85064584 | 0.0499042  | 3.78866862 | 0.00757467 | 4.89111594 |
| P49186 | Mapk9   | Mitogen-activated protein kinase 9                                      | 110.91  | 4.96  | 48017  | 2  | 0.04993052 | 2.68130885 | 0.01559938 | 3.311814   | 0.02072695 | 3.20738608 |
