# Supplementary material for: Does size matter? A proteomics-informed comparison of the effects of polystyrene beads of different sizes on macrophages
Source: Royal Society of Chemistry journal article supplement (doi:10.1039/d2en00214k), 2022-01-01
Supplement: d2en00214k13.pdf [file d2en00214k13.pdf]

Supplementary Table 6: list of proteins which abundance is significantly modified in response to cell exposure to 100 nm PS particles only

| acc number | gene_name | description                                                                                   | protein_set_s<br>core | coverage | MW     | #peptides | T test 0.1<br>µm | Ratio 0.1<br>µm/ctrl |
|------------|-----------|-----------------------------------------------------------------------------------------------|-----------------------|----------|--------|-----------|------------------|----------------------|
| O09172     | Gclm      | Glutamate--cysteine ligase regulatory subunit                                                 | 154.92                | 13.5     | 30535  | 3         | 0.03312297       | 1.36465257           |
| P25799     | Nfkb1     | Nuclear factor NF-kappa-B p105 subunit                                                        | 47.84                 | 1.65     | 105615 | 1         | 0.03520527       | 1.76825337           |
| P97376     | Frg1      | Protein FRG1                                                                                  | 73.39                 | 5.04     | 29127  | 1         | 0.04734874       | 1.71650466           |
| Q91YT7     | Ythdf2    | YTH domain-containing family protein 2                                                        | 163.47                | 5.53     | 62280  | 3         | 0.02022707       | 1.79404538           |
| Q8R1N4     | Nudcd3    | NudC domain-containing protein 3                                                              | 40.24                 | 3.31     | 40890  | 1         | 0.02957532       | 2.12355726           |
| P47809     | Map2k4    | Dual specificity mitogen-activated protein kinase 4                                           | 60.38                 | 4.28     | 44114  | 1         | 0.03718528       | 1.78279109           |
| Q9CYA0     | Creld2    | Cysteine-rich with EGF-like domain protein 2                                                  | 150.97                | 12       | 38220  | 3         | 0.03724787       | 2.8290225            |
| Q4KM92     | Pus1      | tRNA pseudouridine synthase A                                                                 | 56.88                 | 2.36     | 47515  | 1         | 0.04372878       | 2.02036107           |
| Q9QYJ0     | Dnaja2    | DnaJ homolog subfamily A member 2                                                             | 366.82                | 27.43    | 45746  | 7         | 0.0267656        | 1.40016914           |
| Q5BJP6     | Gfm2      | Ribosome-releasing factor 2, mitochondrial                                                    | 76.57                 | 2.7      | 85914  | 2         | 0.03941526       | 1.94117183           |
| P00375     | Dhfr      | Dihydrofolate reductase                                                                       | 231.23                | 33.69    | 21606  | 5         | 0.0264804        | 2.53603104           |
| Q62095     | Ddx3y     | ATP-dependent RNA helicase DDX3Y                                                              | 1169.83               | 30.09    | 73428  | 20        | 0.01929652       | 1.38625484           |
| P25322     | Ccnd1     | G1/S-specific cyclin-D1                                                                       | 101.89                | 9.49     | 33429  | 2         | 0.02561405       | 1.99320096           |
| Q3B7D1     | Ube2z     | Ubiquitin-conjugating enzyme E2 Z                                                             | 50.67                 | 2.25     | 38352  | 1         | 0.03133215       | 423672.444           |
| Q9CQV5     | Mrps24    | 28S ribosomal protein S24, mitochondrial                                                      | 41.99                 | 4.79     | 18901  | 1         | 0.02833895       | 2.61373218           |
| Q9CQJ2     | Pih1d1    | PIH1 domain-containing protein 1                                                              | 83.14                 | 10.69    | 32209  | 2         | 0.03646495       | 1.89456043           |
| Q99J09     | Wdr77     | Methylosome protein 50                                                                        | 124.01                | 11.4     | 36943  | 3         | 0.04626939       | 1.95863048           |
| P58044     | Idi1      | Isopentenyl-diphosphate Delta-isomerase 1                                                     | 213.48                | 29.07    | 26289  | 4         | 0.03287828       | 1.96497662           |
| P47713     | Pla2g4a   | Cytosolic phospholipase A2                                                                    | 290.87                | 10.56    | 85222  | 6         | 0.03986666       | 1.43684647           |
| P62082     | Rps7      | 40S ribosomal protein S7                                                                      | 473.09                | 40.21    | 22127  | 9         | 0.04673078       | 1.28179053           |
| P20611     | Acp2      | Lysosomal acid phosphatase                                                                    | 119.29                | 4.49     | 48320  | 2         | 0.04364179       | 2.47627032           |
| Q9D7S7     | Rpl2211   | 60S ribosomal protein L22-like 1                                                              | 294.61                | 45.08    | 14467  | 4         | 0.02509847       | 1.3854026            |
| Q6PGB6     | Naa50     | N-alpha-acetyltransferase 50                                                                  | 171.35                | 23.67    | 19414  | 3         | 0.02659503       | 1.95146319           |
| Q6PDG5     | Smarcc2   | SWI/SNF complex subunit SMARCC2                                                               | 341.55                | 6.51     | 132604 | 6         | 0.03045108       | 1.17016569           |
| P29595     | Nedd8     | NEDD8                                                                                         | 173.17                | 41.98    | 8972   | 3         | 0.04614172       | 1.660407             |
| P62830     | Rpl23     | 60S ribosomal protein L23                                                                     | 558.84                | 61.43    | 14865  | 9         | 0.03980129       | 1.26498253           |
| Q4LDD4     | Arap1     | Arf-GAP with Rho-GAP domain, ANK repeat and PH domain-containing protein 1                    | 44.15                 | 0.96     | 162276 | 1         | 0.00046882       | 8.53414965           |
| Q9CQW9     | Ifitm3    | Interferon-induced transmembrane protein 3                                                    | 423.19                | 48.91    | 14954  | 6         | 0.0269421        | 1.52033954           |
| Q5PPI1     | Srsf9     | Serine/arginine-rich splicing factor 9                                                        | 71.68                 | 8.6      | 25498  | 2         | 0.01509905       | 0.57451592           |
| Q99KP6     | Prpf19    | Pre-mRNA-processing factor 19                                                                 | 730.57                | 46.03    | 55239  | 15        | 0.00489168       | 1.19349666           |
| P12970     | Rpl7a     | 60S ribosomal protein L7a                                                                     | 1176.68               | 53.76    | 29977  | 20        | 0.045144         | 1.32066875           |
| Q61990     | Pcbp2     | Poly(rC)-binding protein 2                                                                    | 955.25                | 46.96    | 38222  | 13        | 0.02598166       | 1.29807873           |
| Q9R1J0     | Nsdhl     | Sterol-4-alpha-carboxylate 3-dehydrogenase, decarboxylating                                   | 96.75                 | 8.29     | 40686  | 2         | 0.01960483       | 1.72525787           |
| O35343     | Kpna4     | Importin subunit alpha-3                                                                      | 216.89                | 7.1      | 57923  | 2         | 0.04053912       | 1.74756567           |
| O35887     | Calu      | Calumenin                                                                                     | 154.25                | 18.73    | 37064  | 3         | 0.04208812       | 1.93308865           |
| Q80TE0     | Rpap1     | RNA polymerase II-associated protein 1                                                        | 57.46                 | 0.92     | 155270 | 1         | 0.00073177       | 7.94421962           |
| Q9QYJ3     | Dnajb1    | DnaJ homolog subfamily B member 1                                                             | 217.97                | 15.59    | 38167  | 4         | 0.02077183       | 2.26299164           |
| Q91ZR2     | Snx18     | Sorting nexin-18                                                                              | 184.15                | 8.63     | 67904  | 4         | 0.04860602       | 1.26592739           |
| Q6AXS5     | Serbp1    | Plasminogen activator inhibitor 1 RNA-binding protein                                         | 750.73                | 43.24    | 44754  | 14        | 0.03951473       | 1.49275467           |
| P17095     | Hmga1     | High mobility group protein HMG-I/HMG-Y                                                       | 98.23                 | 23.36    | 11614  | 2         | 0.04871008       | 0.73321711           |
| Q8BH61     | F13a1     | Coagulation factor XIII A chain                                                               | 43.47                 | 2.19     | 83207  | 1         | 9.5774E-05       | 10.5821355           |
| Q80ZK0     | Mrps10    | 28S ribosomal protein S10, mitochondrial                                                      | 48.64                 | 11.25    | 18698  | 1         | 0.04160827       | 1.59279703           |
| O70454     | Bud31     | Protein BUD31 homolog                                                                         | 180.02                | 20.83    | 17000  | 4         | 0.03157364       | 1.40901651           |
| Q6PDV7     | Rpl10     | 60S ribosomal protein L10                                                                     | 531.95                | 41.12    | 24604  | 10        | 0.01305406       | 1.31226793           |
| Q6PDM2     | Srsf1     | Serine/arginine-rich splicing factor 1                                                        | 544.95                | 33.47    | 27745  | 10        | 0.03489762       | 0.73548388           |
| Q8CI75     | Dis3l2    | DIS3-like exonuclease 2                                                                       | 39.65                 | 1.15     | 97775  | 1         | 0.02301618       | 3.34071561           |
| Q9CPT4     | Mydgf     | Myeloid-derived growth factor                                                                 | 112.19                | 16.27    | 17982  | 2         | 0.04700819       | 2.15957548           |
| P58681     | Tlr7      | Toll-like receptor 7                                                                          | 118.74                | 2.29     | 121837 | 2         | 0.04239818       | 2.61040678           |
| Q8BGR9     | Ublep1    | Ubiquitin-like domain-containing CTD phosphatase 1                                            | 96.65                 | 6.6      | 36837  | 2         | 0.01156591       | 2.86644791           |
| P58389     | Ptpa      | Serine/threonine-protein phosphatase 2A activator                                             | 93.03                 | 5.88     | 36710  | 1         | 0.02719907       | 3.08930295           |
| Q8VEJ4     | Nle1      | Notchless protein homolog 1                                                                   | 229.67                | 13.61    | 53134  | 5         | 0.0346349        | 1.36661864           |
| Q61656     | Ddx5      | Probable ATP-dependent RNA helicase DDX5                                                      | 1979.67               | 53.58    | 69290  | 35        | 0.0412524        | 1.14145659           |
| P35601     | Rfc1      | Replication factor C subunit 1                                                                | 78.45                 | 1.06     | 125985 | 1         | 0.0299269        | 2.30312402           |
| P14115     | Rpl27a    | 60S ribosomal protein L27a                                                                    | 313.86                | 31.08    | 16605  | 5         | 0.00754182       | 1.42469916           |
| Q6AY79     | Hgh1      | Protein HGH1 homolog                                                                          | 39.73                 | 3.31     | 43132  | 1         | 0.00106014       | 5.29029271           |
| Q8R3C6     | Rbm19     | Probable RNA-binding protein 19                                                               | 38.38                 | 1.05     | 106083 | 1         | 0.02978767       | 2.02816663           |
| O54941     | Smarce1   | SWI/SNF-related matrix-associated actin-dependent regulator of chromatin subfamily E member 1 | 80.67                 | 5.6      | 46638  | 2         | 0.02059125       | 2.17184103           |

|        |          |                                              |        |       |       |   |            |            |
|--------|----------|----------------------------------------------|--------|-------|-------|---|------------|------------|
| Q07797 | Lgals3bp | Galectin-3-binding protein                   | 389.03 | 17.85 | 64491 | 6 | 0.03150463 | 1.43003024 |
| Q9R1Q6 | Tmem176b | Transmembrane protein 176B                   | 48.2   | 5.7   | 28367 | 1 | 0.00967174 | 3.85278509 |
| P21956 | Mfge8    | Lactadherin                                  | 112.39 | 6.7   | 51241 | 3 | 0.02641544 | 1.52432714 |
| Q61704 | Itih3    | Inter-alpha-trypsin inhibitor heavy chain H3 | 125.95 | 2.47  | 99358 | 3 | 0.00225946 | 1.83072819 |
