# Supplementary material for: Does size matter? A proteomics-informed comparison of the effects of polystyrene beads of different sizes on macrophages
Source: Royal Society of Chemistry journal article supplement (doi:10.1039/d2en00214k), 2022-01-01
Supplement: d2en00214k14.pdf [file d2en00214k14.pdf]

Supplementary Table 7: list of proteins which abundance is significantly modified in response to cell exposure to 1 micrometer PS particles only

| acc number | gene_name | description                                                   | protein_set_score | coverage | MW     | #peptides | T test 1 $\mu$ m | Ratio 1 $\mu$ m/ctrl |
|------------|-----------|---------------------------------------------------------------|-------------------|----------|--------|-----------|------------------|----------------------|
| Q8VCT3     | Rnpep     | Aminopeptidase B                                              | 1093.15           | 38.46    | 72416  | 17        | 0.03043867       | 1.5129328            |
| P68433     | Hist1h3a  | Histone H3.1                                                  | 745.88            | 61.76    | 15404  | 11        | 0.03723589       | 0.33432056           |
| D4A2Z8     | Dhx36     | ATP-dependent DNA/RNA helicase DHX36                          | 220.46            | 6.4      | 113843 | 4         | 0.0479486        | 1.9701595            |
| P02301     | H3f3c     | Histone H3.3C                                                 | 574.81            | 54.41    | 15315  | 9         | 0.03770303       | 0.33489212           |
| Q3T1J9     | Mob1a     | MOB kinase activator 1A                                       | 183.3             | 18.98    | 25080  | 5         | 0.03545395       | 1.69509344           |
| Q91WT8     | Rbm47     | RNA-binding protein 47                                        | 42.72             | 3.39     | 64062  | 1         | 0.0398106        | 2.51921891           |
| Q6GQT9     | Nomo1     | Nodal modulator 1                                             | 806.74            | 18.45    | 133420 | 14        | 0.0451961        | 0.48896775           |
| Q69ZS7     | Hbs11     | HBS1-like protein                                             | 101.36            | 2.79     | 75100  | 2         | 0.02782663       | 2.39306433           |
| P06745     | Gpi       | Glucose-6-phosphate isomerase                                 | 2083.16           | 58.06    | 62767  | 34        | 0.02044202       | 1.69220508           |
| P11499     | Hsp90ab1  | Heat shock protein HSP 90-beta                                | 4353.79           | 70.03    | 83281  | 63        | 0.03799392       | 1.62704511           |
| P16460     | Ass1      | Argininosuccinate synthase                                    | 287.23            | 13.11    | 46584  | 6         | 0.02476753       | 1.65638329           |
| Q75Q40     | Tomm40    | Mitochondrial import receptor subunit TOM40 homolog           | 539.18            | 39.34    | 37919  | 9         | 0.02353867       | 0.60987432           |
| Q8VIJ6     | Sfpq      | Splicing factor, proline- and glutamine-rich                  | 1483.98           | 33.19    | 75442  | 24        | 0.04320463       | 0.77990621           |
| Q91VY9     | Znf622    | Zinc finger protein 622                                       | 61.8              | 4.41     | 53451  | 1         | 0.03788661       | 1.76899696           |
| O88738     | Birc6     | Baculoviral IAP repeat-containing protein 6                   | 111.77            | 0.8      | 532170 | 3         | 0.03919258       | 1.76741588           |
| O88543     | Cops3     | COP9 signalosome complex subunit 3                            | 347.55            | 21.28    | 47832  | 7         | 0.00432053       | 1.65203403           |
| Q9QZL0     | Ripk3     | Receptor-interacting serine/threonine-protein kinase 3        | 73.14             | 5.76     | 53322  | 2         | 0.0115275        | 2.0604972            |
| P62855     | Rps26     | 40S ribosomal protein S26                                     | 194.42            | 24.35    | 13015  | 3         | 0.04533591       | 1.35787438           |
| Q9JJ78     | Pbk       | Lymphokine-activated killer T-cell-originated protein kinase  | 54.25             | 3.94     | 36745  | 1         | 0.02231156       | 2.16334858           |
| P35585     | Ap1m1     | AP-1 complex subunit mu-1                                     | 223.66            | 14.89    | 48543  | 5         | 0.04962847       | 1.79525547           |
| Q8K0V4     | Cnot3     | CCR4-NOT transcription complex subunit 3                      | 47.01             | 2.53     | 81946  | 1         | 0.02826517       | 7.01943922           |
| Q9CZW4     | Acsl3     | Long-chain-fatty-acid--CoA ligase 3                           | 321.46            | 9.17     | 80492  | 5         | 0.04005057       | 1.94620571           |
| Q91VR2     | Atp5f1c   | ATP synthase subunit gamma, mitochondrial                     | 482.45            | 28.52    | 32886  | 9         | 0.02634531       | 0.73268693           |
| Q3TDD9     | Ppp1r21   | Protein phosphatase 1 regulatory subunit 21                   | 43.24             | 1.92     | 88338  | 1         | 0.03940278       | 1.67834526           |
| Q80VD1     | Fam98b    | Protein FAM98B                                                | 252.46            | 13.29    | 45349  | 5         | 0.04524084       | 1.82458539           |
| P63280     | Ube2i     | SUMO-conjugating enzyme UBC9                                  | 275.56            | 27.85    | 18007  | 5         | 0.01147093       | 1.60569575           |
| P15429     | Eno3      | Beta-enolase                                                  | 668.53            | 19.82    | 47014  | 7         | 0.03630315       | 1.62924079           |
| Q9EST5     | Anp32b    | Acidic leucine-rich nuclear phosphoprotein 32 family member B | 373.31            | 25.74    | 31079  | 8         | 0.042213         | 1.43818454           |
| O08579     | Emd       | Emerin                                                        | 335.04            | 47.88    | 29436  | 7         | 0.03338261       | 0.7493132            |
| P11497     | Acaca     | Acetyl-CoA carboxylase 1                                      | 179.64            | 2.6      | 265194 | 4         | 0.03176953       | 2.03235397           |
| P28063     | Psmb8     | Proteasome subunit beta type-8                                | 602.14            | 42.39    | 30260  | 10        | 0.01865922       | 1.46406553           |
| Q63228     | Gmfb      | Glia maturation factor beta                                   | 271.63            | 35.21    | 16736  | 4         | 0.04469895       | 1.38261519           |
| Q5U2R0     | Mat2b     | Methionine adenosyltransferase 2 subunit beta                 | 152.24            | 9.58     | 37375  | 3         | 0.01868739       | 1.6369411            |
| Q8CGI1     | Fam193a   | Protein FAM193A                                               | 37.06             | 0.81     | 136714 | 1         | 0.01169309       | 1.75439715           |
| P17751     | Tpi1      | Triosephosphate isomerase                                     | 1513.19           | 74.25    | 32192  | 21        | 0.01885117       | 1.73955611           |
| Q9CRA8     | Exosc5    | Exosome complex component RRP46                               | 106.4             | 9.79     | 25194  | 2         | 0.01425812       | 2.01898853           |
| Q641Z8     | Pef1      | Peflin                                                        | 63.59             | 4.59     | 30012  | 1         | 0.04444665       | 2.22215035           |
| Q9R1P1     | Psmb3     | Proteasome subunit beta type-3                                | 809.18            | 51.71    | 22965  | 13        | 0.04327078       | 1.48450621           |
| P01902     | H2-K1     | H-2 class I histocompatibility antigen, K-D alpha chain       | 430.13            | 23.1     | 41490  | 8         | 0.01165795       | 0.6008847            |
| O35095     | Ncdn      | Neurochondrin                                                 | 96.84             | 4.39     | 78923  | 2         | 0.01474375       | 2.815497             |
| Q7TNC4     | Luc7l2    | Putative RNA-binding protein Luc7-like 2                      | 347.62            | 20.41    | 46583  | 7         | 0.04910451       | 1.46655696           |
| Q8C878     | Uba3      | NEDD8-activating enzyme E1 catalytic subunit                  | 158.9             | 14.07    | 51737  | 3         | 0.03302853       | 2.28630695           |
| Q8C166     | Cpne1     | Copine-1                                                      | 634.77            | 27.05    | 58887  | 12        | 0.04973723       | 0.79197995           |
| Q62422     | Ostf1     | Osteoclast-stimulating factor 1                               | 344.67            | 34.42    | 23783  | 6         | 0.01271472       | 1.73464214           |
| P10639     | Txn       | Thioredoxin                                                   | 234.83            | 35.24    | 11675  | 4         | 0.04438198       | 1.67043517           |
| P59328     | Wdhd1     | WD repeat and HMG-box DNA-binding protein 1                   | 159.33            | 4.3      | 124254 | 5         | 0.00028523       | 1.38040641           |
| Q9D1E6     | Tbcb      | Tubulin-folding cofactor B                                    | 44.83             | 8.2      | 27386  | 1         | 0.04985664       | 2.69318231           |
| Q00422     | Gabpa     | GA-binding protein alpha chain                                | 82.78             | 3.96     | 51344  | 2         | 0.00021839       | 3.40862091           |
| Q3TCJ1     | Abraxas2  | BRISC complex subunit Abraxas 2                               | 218.47            | 14.7     | 46943  | 4         | 0.02761151       | 1.97761788           |
| Q60931     | Vdac3     | Voltage-dependent anion-selective channel protein 3           | 407.52            | 28.98    | 30753  | 6         | 0.03707122       | 0.66713182           |
| Q8VC03     | Eml3      | Echinoderm microtubule-associated protein-like 3              | 142.55            | 4.12     | 95695  | 3         | 0.03516049       | 2.03618729           |

|        |         |                                                                  |         |       |        |    |            |            |
|--------|---------|------------------------------------------------------------------|---------|-------|--------|----|------------|------------|
| Q3U9G9 | Lbr     | Lamin-B receptor                                                 | 552.18  | 17.73 | 71440  | 10 | 0.04983745 | 0.47576062 |
| Q62523 | Zyx     | Zyxin                                                            | 398.79  | 21.99 | 60546  | 9  | 0.01714292 | 1.28669386 |
| Q9JK23 | Psmg1   | Proteasome assembly chaperone 1                                  | 190.57  | 13.15 | 33104  | 3  | 0.02602944 | 1.91547287 |
| P33610 | Prim2   | DNA primase large subunit                                        | 253.3   | 11.09 | 58408  | 4  | 0.02986141 | 2.0696751  |
| Q91VC3 | Eif4a3  | Eukaryotic initiation factor 4A-III                              | 707.67  | 27.49 | 46840  | 11 | 0.04019697 | 0.83359075 |
| Q60605 | Myl6    | Myosin light polypeptide 6                                       | 753.38  | 66.23 | 16930  | 11 | 0.04685827 | 1.18873988 |
| Q64521 | Gpd2    | Glycerol-3-phosphate dehydrogenase, mitochondrial                | 650.57  | 22.01 | 80954  | 10 | 0.02185706 | 0.64080982 |
| O35900 | Lsm2    | U6 snRNA-associated Sm-like protein LSM2                         | 120.7   | 20    | 10835  | 1  | 0.00799141 | 2.13094294 |
| Q8VBT0 | Tmx1    | Thioredoxin-related transmembrane protein 1                      | 171.11  | 12.59 | 31396  | 3  | 0.00329008 | 0.74068343 |
| Q9JK38 | Gnpnat1 | Glucosamine 6-phosphate N-acetyltransferase                      | 68.79   | 5.98  | 20791  | 1  | 0.00980558 | 4.51066399 |
| P14733 | Lmnb1   | Lamin-B1                                                         | 2214.53 | 59.69 | 66786  | 40 | 0.04523892 | 0.66284586 |
| O35129 | Phb2    | Prohibitin-2                                                     | 1314.53 | 74.25 | 33296  | 22 | 0.00613952 | 0.67416531 |
| Q9CRA5 | Golph3  | Golgi phosphoprotein 3                                           | 131.4   | 10.4  | 33752  | 2  | 0.03167397 | 1.93742197 |
| O08709 | Prdx6   | Peroxisredoxin-6                                                 | 857.43  | 72.77 | 24871  | 15 | 0.04389868 | 1.70348817 |
| P37727 | Chm     | Rab proteins geranylgeranyltransferase component A 1             | 43.48   | 1.38  | 72480  | 1  | 0.02611004 | 1.91791934 |
| Q8C7X2 | Emc1    | ER membrane protein complex subunit 1                            | 955.99  | 25.88 | 111605 | 17 | 0.01057493 | 0.70370891 |
| P70296 | Pebp1   | Phosphatidylethanolamine-binding protein 1                       | 318.11  | 49.73 | 20830  | 5  | 0.02443297 | 1.59669048 |
| O88377 | Pip4k2b | Phosphatidylinositol 5-phosphate 4-kinase type-2 beta            | 62.76   | 3.37  | 47264  | 1  | 0.00159718 | 163976.969 |
| Q6PAM1 | Txlna   | Alpha-taxilin                                                    | 167.46  | 6.14  | 62369  | 2  | 0.02838982 | 2.24038644 |
| Q9CQT1 | Mri1    | Methylthioribose-1-phosphate isomerase                           | 419.89  | 29    | 39411  | 7  | 0.02115044 | 1.6592354  |
| Q61166 | Mapre1  | Microtubule-associated protein RP/EB family member 1             | 323.06  | 30.6  | 30016  | 6  | 0.04180373 | 1.29682673 |
| O70199 | Ugdh    | UDP-glucose 6-dehydrogenase                                      | 51.94   | 1.83  | 54892  | 1  | 0.00051761 | 5.49470452 |
| Q6AYT7 | Abhd12  | Monoacylglycerol lipase ABHD12                                   | 475.06  | 31.41 | 45296  | 10 | 0.03561373 | 0.63534647 |
| Q9Z2U0 | Psma7   | Proteasome subunit alpha type-7                                  | 682.84  | 53.23 | 27855  | 12 | 0.01248645 | 1.72260325 |
| Q3TJZ6 | Fam98a  | Protein FAM98A                                                   | 182.92  | 8.35  | 55055  | 4  | 0.04891632 | 1.68482887 |
| Q9CR60 | Golt1b  | Vesicle transport protein GOT1B                                  | 151.02  | 10.87 | 15422  | 2  | 0.03830082 | 0.52854875 |
| Q3V300 | Kif22   | Kinesin-like protein KIF22                                       | 199.06  | 5.3   | 73190  | 3  | 0.03958963 | 2.48199654 |
| Q07832 | Plk1    | Serine/threonine-protein kinase PLK1                             | 52.95   | 2.16  | 68301  | 1  | 0.03089502 | 2.32259666 |
| Q99LX0 | Park7   | Protein/nucleic acid deglycase DJ-1                              | 862.06  | 85.71 | 20021  | 14 | 0.03701703 | 1.53238343 |
| P16884 | Nefh    | Neurofilament heavy polypeptide                                  | 82.43   | 1.59  | 115378 | 2  | 0.0436048  | 2.11830561 |
| Q5SUF2 | Luc7l3  | Luc7-like protein 3                                              | 482.02  | 21.76 | 51450  | 7  | 0.01311282 | 1.44890002 |
| Q99JH1 | Rpp25l  | Ribonuclease P protein subunit p25-like protein                  | 38.46   | 5.52  | 17675  | 1  | 0.04058182 | 2.19308716 |
| Q8CAQ8 | Immt    | MICOS complex subunit Mic60                                      | 1617.9  | 46.24 | 83900  | 26 | 0.01519396 | 0.68102017 |
| P21619 | Lmnb2   | Lamin-B2                                                         | 520.9   | 15.94 | 67318  | 9  | 0.04824758 | 0.78205048 |
| O35841 | Api5    | Apoptosis inhibitor 5                                            | 603.03  | 27.18 | 56785  | 9  | 0.03374434 | 1.40528045 |
| Q32PX7 | Fubp1   | Far upstream element-binding protein 1                           | 712.51  | 27.39 | 67197  | 14 | 0.02813214 | 1.35228736 |
| P54313 | Gnb2    | Guanine nucleotide-binding protein G(I)/G(S)/G(T) subunit beta-2 | 1122.22 | 60.29 | 37331  | 16 | 0.01037126 | 0.71657762 |
| P67778 | Phb     | Prohibitin                                                       | 1327.9  | 83.46 | 29820  | 20 | 0.01994326 | 0.71137331 |
| Q3UMY5 | Eml4    | Echinoderm microtubule-associated protein-like 4                 | 105.37  | 3.64  | 110027 | 2  | 0.01230848 | 2.1701783  |
| Q8BMZ5 | Tsen34  | tRNA-splicing endonuclease subunit Sen34                         | 86.17   | 7.59  | 34196  | 2  | 0.04733272 | 1.90708053 |
| P0C5H9 | Manf    | Mesencephalic astrocyte-derived neurotrophic factor              | 36.47   | 7.82  | 20388  | 1  | 0.0176572  | 2.83733187 |
| Q499W2 | Gins4   | DNA replication complex GINS protein SLD5                        | 80.44   | 12.56 | 26062  | 2  | 0.01776032 | 2.10674748 |
| Q6PGH2 | Jpt2    | Jupiter microtubule associated homolog 2                         | 162.14  | 21.58 | 20020  | 3  | 0.0322535  | 1.40668341 |
| P05555 | Itgam   | Integrin alpha-M                                                 | 1525.94 | 24.02 | 127481 | 25 | 0.02242427 | 0.7133324  |
| P63174 | Rpl38   | 60S ribosomal protein L38                                        | 218.48  | 48.57 | 8218   | 4  | 0.02429784 | 1.72946665 |
| Q6AXS3 | Dek     | Protein DEK                                                      | 210.5   | 10.58 | 42892  | 4  | 0.03425415 | 1.22273393 |
| Q9DCN2 | Cyb5r3  | NADH-cytochrome b5 reductase 3                                   | 772.85  | 35.88 | 34128  | 11 | 0.0359292  | 0.70086439 |
| P30285 | Cdk4    | Cyclin-dependent kinase 4                                        | 129.44  | 8.25  | 33751  | 2  | 0.04757625 | 1.60756841 |
| Q8CCP0 | Nemf    | Nuclear export mediator factor Nemf                              | 82.61   | 2.91  | 121188 | 2  | 0.02049413 | 2.0155918  |

|        |            |                                                                              |         |       |        |    |            |            |
|--------|------------|------------------------------------------------------------------------------|---------|-------|--------|----|------------|------------|
| Q8BGA5 | Krr1       | KRR1 small subunit processome component homolog                              | 129.86  | 7.89  | 43538  | 3  | 0.03898191 | 1.86222461 |
| A1L1L2 | Tmem214    | Transmembrane protein 214                                                    | 65.71   | 2.04  | 76566  | 1  | 0.04708803 | 0.53527204 |
| Q9D358 | Acp1       | Low molecular weight phosphotyrosine protein phosphatase                     | 444.4   | 60.76 | 18192  | 6  | 0.02331313 | 1.80703951 |
| P04550 | Ptms       | Parathymosin                                                                 | 73.71   | 10.78 | 11559  | 1  | 0.03768423 | 1.26577869 |
| Q63584 | Tmed10     | Transmembrane emp24 domain-containing protein 10                             | 412.94  | 27.85 | 24858  | 7  | 0.02772931 | 0.83496116 |
| Q8CG45 | Akr7a2     | Aflatoxin B1 aldehyde reductase member 2                                     | 74.93   | 4.09  | 40675  | 1  | 0.01894509 | 1.97274119 |
| Q9D883 | U2af1      | Splicing factor U2AF 35 kDa subunit                                          | 333.06  | 22.18 | 27815  | 5  | 0.04231988 | 1.43111939 |
| P11167 | Slc2a1     | Solute carrier family 2, facilitated glucose transporter member 1            | 270.66  | 9.96  | 53963  | 4  | 0.04507204 | 0.58050465 |
| Q62351 | Tfrc       | Transferrin receptor protein 1                                               | 1069.33 | 26.34 | 85731  | 20 | 0.0040118  | 0.71556726 |
| Q9D7E3 | Ovca2      | Esterase OVCA2                                                               | 42.82   | 4.89  | 24246  | 1  | 0.02982408 | 2.52234383 |
| Q04931 | Ssrp1      | FACT complex subunit SSRP1                                                   | 254.85  | 11.42 | 80914  | 5  | 0.02416706 | 1.37458503 |
| Q9DB77 | Uqcrc2     | Cytochrome b-c1 complex subunit 2, mitochondrial                             | 1094.11 | 41.94 | 48235  | 17 | 0.0125106  | 0.79083924 |
| P97822 | Anp32e     | Acidic leucine-rich nuclear phosphoprotein 32 family member E                | 248.96  | 17.69 | 29622  | 4  | 0.01591827 | 2.07585116 |
| Q9JHI5 | Ivd        | Isovaleryl-CoA dehydrogenase, mitochondrial                                  | 323.11  | 16.75 | 46325  | 7  | 0.0439386  | 0.74509161 |
| Q66HG8 | Ik         | Protein Red                                                                  | 98.65   | 7.18  | 65588  | 3  | 0.04657352 | 1.93458884 |
| P24452 | Capg       | Macrophage-capping protein                                                   | 1306.43 | 42.61 | 39240  | 16 | 0.04811746 | 1.52623626 |
| P09411 | Pgk1       | Phosphoglycerate kinase 1                                                    | 2549.8  | 77.94 | 44550  | 37 | 0.0434175  | 1.57687514 |
| E9Q4Z2 | Acacb      | Acetyl-CoA carboxylase 2                                                     | 63.4    | 1.35  | 275750 | 2  | 0.04642434 | 2.74407605 |
| Q8BGA9 | Oxa11      | Mitochondrial inner membrane protein OXA1L                                   | 40.43   | 2.08  | 48220  | 1  | 0.02961093 | 0.74373643 |
| Q9DC69 | Ndufa9     | NADH dehydrogenase [ubiquinone] 1 alpha subcomplex subunit 9, mitochondrial  | 366.92  | 23.61 | 42525  | 6  | 0.0470649  | 0.64375434 |
| Q91WD5 | Ndufs2     | NADH dehydrogenase [ubiquinone] iron-sulfur protein 2, mitochondrial         | 338.61  | 16.41 | 52626  | 5  | 0.03339481 | 0.53582119 |
| Q8BGS2 | Bola2      | Bola-like protein 2                                                          | 91.62   | 20.93 | 10215  | 2  | 0.02876429 | 2.02866144 |
| Q8BZA9 | Tigar      | Fructose-2,6-bisphosphatase TIGAR                                            | 181.81  | 19.33 | 29191  | 3  | 0.03230321 | 1.53530782 |
| Q3TBD2 | Arhgap45   | Rho GTPase-activating protein 45                                             | 175.73  | 3.94  | 122902 | 3  | 0.02632791 | 2.08733204 |
| Q9D211 | Cdkn2aipnl | CDKN2AIP N-terminal-like protein 1                                           | 78.86   | 18.97 | 13209  | 2  | 0.00224408 | 3.47603424 |
| P53994 | Rab2a      | Ras-related protein Rab-2A                                                   | 478.13  | 38.68 | 23548  | 8  | 0.03796646 | 0.74945196 |
| P54731 | Faf1       | FAS-associated factor 1                                                      | 93.16   | 2     | 73863  | 2  | 0.03970739 | 1.9884257  |
| P62962 | Pfn1       | Profilin-1                                                                   | 1196.8  | 94.29 | 14957  | 18 | 0.03795342 | 1.61346034 |
| P30904 | Mif        | Macrophage migration inhibitory factor                                       | 183.07  | 17.39 | 12477  | 3  | 0.0415687  | 1.67002505 |
| P14882 | Pcca       | Propionyl-CoA carboxylase alpha chain, mitochondrial                         | 41.72   | 2.04  | 81623  | 1  | 0.0414621  | 0.0541788  |
| Q6ZQI3 | Mlec       | Malectin                                                                     | 128.98  | 9.97  | 32342  | 2  | 0.04029815 | 0.70262675 |
| P25206 | Mcm3       | DNA replication licensing factor MCM3                                        | 1298.46 | 33.5  | 91546  | 20 | 0.04303963 | 1.27138186 |
| Q9Z0U1 | Tjp2       | Tight junction protein ZO-2                                                  | 87.57   | 2.66  | 131280 | 3  | 0.02901394 | 2.5689343  |
| Q9QZ73 | Dcun1d1    | DCN1-like protein 1                                                          | 45.08   | 5.02  | 30097  | 1  | 0.04694835 | 1.80065898 |
| O35522 | Psmb9      | Proteasome subunit beta type-9                                               | 259.13  | 29.68 | 23427  | 5  | 0.02624169 | 1.51588457 |
| Q99LC3 | Ndufa10    | NADH dehydrogenase [ubiquinone] 1 alpha subcomplex subunit 10, mitochondrial | 337.17  | 19.44 | 40603  | 6  | 0.0433896  | 0.61648904 |
| P56480 | Atp5f1b    | ATP synthase subunit beta, mitochondrial                                     | 2393.99 | 69    | 56300  | 35 | 0.02765187 | 0.70452828 |
| O09117 | Syp11      | Synaptophysin-like protein 1                                                 | 83.03   | 4.21  | 28899  | 2  | 0.03781233 | 0.70878187 |
| P51881 | Slc25a5    | ADP/ATP translocase 2                                                        | 1922.33 | 78.19 | 32931  | 28 | 0.04856131 | 0.6802426  |
| P62254 | Ube2g1     | Ubiquitin-conjugating enzyme E2 G1                                           | 45.17   | 5.88  | 19509  | 1  | 0.04888212 | 1.76812537 |
| P70218 | Map4k1     | Mitogen-activated protein kinase kinase kinase 1                             | 41.66   | 1.09  | 91535  | 1  | 0.00453171 | 4.18298884 |
| Q80WJ7 | Mtdh       | Protein LYRIC                                                                | 398.5   | 15.89 | 63846  | 7  | 0.03086256 | 0.80648447 |
| P48962 | Slc25a4    | ADP/ATP translocase 1                                                        | 1241.76 | 60.07 | 32904  | 21 | 0.0434826  | 0.70042386 |
| P49717 | Mcm4       | DNA replication licensing factor MCM4                                        | 1020.22 | 25.87 | 96736  | 17 | 0.03397562 | 1.2346481  |
| Q5FVM3 | Retreg1    | Reticulophagy regulator 1                                                    | 64.63   | 2.29  | 52782  | 1  | 0.02942384 | 3.24240832 |
| Q9ERS2 | Ndufa13    | NADH dehydrogenase [ubiquinone] 1 alpha subcomplex subunit 13                | 147.52  | 13.89 | 16860  | 3  | 0.00870406 | 0.77353867 |

|        |         |                                                                               |        |       |       |    |            |            |
|--------|---------|-------------------------------------------------------------------------------|--------|-------|-------|----|------------|------------|
| Q3SWU3 | Hnrmpdl | Heterogeneous nuclear ribonucleoprotein D-like                                | 123.18 | 16.46 | 35294 | 3  | 0.00704577 | 0.65139699 |
| Q99L45 | Eif2s2  | Eukaryotic translation initiation factor 2 subunit 2                          | 516.94 | 38.07 | 38092 | 10 | 0.03625873 | 1.32251233 |
| P36916 | Gnl1    | Guanine nucleotide-binding protein-like 1                                     | 138.93 | 5.27  | 68771 | 3  | 0.03862605 | 2.27083925 |
| P54311 | Gnb1    | Guanine nucleotide-binding protein G(I)/G(S)/G(T) subunit beta-1              | 561.43 | 31.76 | 37377 | 9  | 0.04838997 | 0.71644009 |
| Q9D892 | Itpa    | Inosine triphosphate pyrophosphatase                                          | 69.54  | 5.56  | 21897 | 1  | 0.03452095 | 1.94651247 |
| P35434 | Atp5f1d | ATP synthase subunit delta, mitochondrial                                     | 182.54 | 15.48 | 17595 | 3  | 0.03433022 | 0.75619665 |
| P47758 | Srprb   | Signal recognition particle receptor subunit beta                             | 333.17 | 31.97 | 29579 | 6  | 0.01357665 | 0.74200775 |
| B0BN18 | Pfdn2   | Prefoldin subunit 2                                                           | 174.48 | 22.73 | 16580 | 3  | 0.01759836 | 1.68329694 |
| Q8BRN9 | Cc2d1b  | Coiled-coil and C2 domain-containing protein 1B                               | 70.91  | 2.71  | 93091 | 1  | 0.04145188 | 2.24243709 |
| P32067 | Ssb     | Lupus La protein homolog                                                      | 849.81 | 33.49 | 47756 | 14 | 0.01404927 | 1.29962385 |
| Q9CZ13 | Uqcrc1  | Cytochrome b-c1 complex subunit 1, mitochondrial                              | 686.76 | 36.88 | 52852 | 12 | 0.01704214 | 0.7084771  |
| P97797 | Sirpa   | Tyrosine-protein phosphatase non-receptor type substrate 1                    | 167.75 | 8.97  | 56425 | 3  | 0.04629281 | 0.78300758 |
| P59017 | Bcl2l13 | Bcl-2-like protein 13                                                         | 41.92  | 6.45  | 46719 | 1  | 0.01560829 | 0.26098947 |
| Q8R146 | Apeh    | Acylamino-acid-releasing enzyme                                               | 300.03 | 13.25 | 81581 | 5  | 0.04081602 | 2.18264891 |
| P62835 | Rap1a   | Ras-related protein Rap-1A                                                    | 826    | 75    | 20987 | 13 | 0.03854453 | 0.86795704 |
| O54734 | Ddost   | Dolichyl-diphosphooligosaccharide--protein glycosyltransferase 48 kDa subunit | 855.66 | 39.46 | 49028 | 13 | 0.04823851 | 0.79491894 |
