# Supplementary material for: Does size matter? A proteomics-informed comparison of the effects of polystyrene beads of different sizes on macrophages
Source: Royal Society of Chemistry journal article supplement (doi:10.1039/d2en00214k), 2022-01-01
Supplement: d2en00214k15.pdf [file d2en00214k15.pdf]

Supplementary Table 8: list of proteins which abundance is significantly modified in response to cell exposure to 10 micrometers PS particles only

| acc number | gene_name  | description                                           | protein_set_score | coverage | MW     | #peptides | T test 10 $\mu$ m | ratio 10 $\mu$ m/ctrl |
|------------|------------|-------------------------------------------------------|-------------------|----------|--------|-----------|-------------------|-----------------------|
| Q8CHM7     | Hac11      | 2-hydroxyacyl-CoA lyase 1                             | 35.49             | 1.38     | 63616  | 1         | 0.00103131        | 114423.065            |
| Q9DBB8     | Dhdh       | Trans-1,2-dihydrobenzene-1,2-diol dehydrogenase       | 57.41             | 3.6      | 36301  | 1         | 0.03095805        | 2.53325757            |
| P46460     | Nsf        | Vesicle-fusing ATPase                                 | 1002.63           | 26.75    | 82613  | 17        | 0.00995622        | 1.26470001            |
| Q9WV32     | Arpc1b     | Actin-related protein 2/3 complex subunit 1B          | 943.68            | 56.18    | 41064  | 16        | 0.01401055        | 1.35958458            |
| Q5DQR4     | Stxbp5l    | Syntaxin-binding protein 5-like                       | 39.04             | 0.93     | 131844 | 1         | 0.03121855        | 1.92836955            |
| P56380     | Nudt2      | Bis(5'-nucleosyl)-tetraphosphatase [asymmetrical]     | 58.76             | 5.44     | 16989  | 1         | 0.00967413        | 2.79225382            |
| P39052     | Dnm2       | Dynamamin-2                                           | 959.39            | 24.6     | 98230  | 19        | 0.00649374        | 1.48021129            |
| O88569     | Hnrnpa2b1  | Heterogeneous nuclear ribonucleoproteins A2/B1        | 2156.49           | 66.86    | 37403  | 28        | 0.01232795        | 0.58024091            |
| Q7TNG5     | Eml2       | Echinoderm microtubule-associated protein-like 2      | 152.47            | 9.4      | 70734  | 3         | 0.0197952         | 2.16611198            |
| Q8R404     | Mic13      | MICOS complex subunit MIC13                           | 72.83             | 33.61    | 13373  | 2         | 0.01978335        | 1.9633823             |
| Q3TDN2     | Faf2       | FAS-associated factor 2                               | 64.36             | 2.7      | 52471  | 1         | 0.01856693        | 1.92676694            |
| P26817     | Grk2       | Beta-adrenergic receptor kinase 1                     | 417.71            | 14.22    | 79785  | 9         | 0.01786779        | 1.54137887            |
| Q921F4     | Hnrnp1l    | Heterogeneous nuclear ribonucleoprotein L-like        | 420.45            | 17.77    | 64125  | 7         | 0.0023345         | 1.93666313            |
| Q3ULJ0     | Gpd11      | Glycerol-3-phosphate dehydrogenase 1-like protein     | 152.89            | 10.54    | 38226  | 3         | 0.03245336        | 1.82724               |
| Q8JZN5     | Acad9      | Acyl-CoA dehydrogenase family member 9, mitochondrial | 411.4             | 13.6     | 68722  | 8         | 0.02447541        | 1.69731438            |
| P99028     | Uqcrh      | Cytochrome b-c1 complex subunit 6, mitochondrial      | 49.72             | 20.22    | 10435  | 1         | 0.00919064        | 0.54476739            |
| Q11136     | Pepd       | Xaa-Pro dipeptidase                                   | 613.22            | 24.75    | 55029  | 11        | 0.00490075        | 2.10540499            |
| Q8BTY2     | Slc4a7     | Sodium bicarbonate cotransporter 3                    | 137               | 3.87     | 116514 | 3         | 0.04391624        | 4.71258204            |
| Q8BL97     | Srsf7      | Serine/arginine-rich splicing factor 7                | 374.51            | 22.1     | 30818  | 8         | 0.02762868        | 0.5454023             |
| O35382     | Exoc4      | Exocyst complex component 4                           | 109.49            | 3.38     | 110545 | 2         | 0.02791135        | 2.24808361            |
| Q9R1C7     | Prpf40a    | Pre-mRNA-processing factor 40 homolog A               | 172.11            | 5.14     | 108481 | 3         | 0.00247031        | 1.74094741            |
| P28271     | Aco1       | Cytoplasmic aconitate hydratase                       | 242.46            | 7.76     | 98126  | 5         | 0.03298348        | 1.75288802            |
| Q80UU2     | Rpp38      | Ribonuclease P protein subunit p38                    | 42.67             | 3.57     | 31129  | 1         | 0.04530645        | 2.78405564            |
| P68368     | Tuba4a     | Tubulin alpha-4A chain                                | 2081.07           | 60.27    | 49924  | 30        | 0.0083177         | 1.74684098            |
| Q3V0K9     | Pls1       | Plastin-1                                             | 651.95            | 7.3      | 70408  | 11        | 0.01378457        | 2.38292608            |
| P70290     | Mpp1       | 55 kDa erythrocyte membrane protein                   | 264.75            | 13.73    | 52227  | 5         | 0.02243023        | 1.86847418            |
| P48193     | Epb41      | Protein 4.1                                           | 214.64            | 8.16     | 95911  | 6         | 0.01055574        | 1.349381              |
| Q99N27     | Snx1       | Sorting nexin-1                                       | 517.91            | 18.39    | 59044  | 9         | 0.01865755        | 1.88332886            |
| Q6P069     | Sri        | Sorcin                                                | 114.87            | 11.62    | 21627  | 2         | 0.01990951        | 2.53468565            |
| Q66H50     | Far1       | Fatty acyl-CoA reductase 1                            | 278.78            | 15.53    | 59268  | 5         | 0.00330977        | 0.50237227            |
| Q8BLN5     | Lss        | Lanosterol synthase                                   | 50.39             | 1.64     | 83141  | 1         | 0.01711236        | 2.59881896            |
| Q91YU8     | Ppan       | Suppressor of SW14 1 homolog                          | 200.54            | 9.36     | 52756  | 4         | 0.03920366        | 0.64911872            |
| Q9DC61     | Pmpca      | Mitochondrial-processing peptidase subunit alpha      | 190.19            | 12.79    | 58279  | 4         | 0.0007781         | 1.88690031            |
| P35922     | Fmr1       | Synaptic functional regulator FMR1                    | 186.6             | 6.03     | 68989  | 3         | 0.04709514        | 1.34285042            |
| O70404     | Vamp8      | Vesicle-associated membrane protein 8                 | 70.24             | 16.83    | 11451  | 2         | 0.02411946        | 1.38383685            |
| Q8BMD8     | Slc25a24   | Calcium-binding mitochondrial carrier protein SCaMC-1 | 381.77            | 27.37    | 52902  | 8         | 0.00088194        | 1.50571302            |
| Q8R4R6     | Nup35      | Nucleoporin NUP35                                     | 284.53            | 29.54    | 34786  | 6         | 0.04171081        | 0.49001616            |
| Q9D855     | Uqcrb      | Cytochrome b-c1 complex subunit 7                     | 38.76             | 9.01     | 13527  | 1         | 0.01964793        | 3.20467027            |
| P26040     | Ezr        | Ezrin                                                 | 1063.09           | 20.48    | 69407  | 17        | 0.0491082         | 1.47419035            |
| P26041     | Msn        | Moesin                                                | 3455.891          | 67.94    | 67767  | 55        | 0.01774231        | 1.50229486            |
| Q9ER88     | Dap3       | 28S ribosomal protein S29, mitochondrial              | 255.45            | 13.3     | 44699  | 4         | 0.04578958        | 1.55736428            |
| Q61207     | Psap       | Prosaposin                                            | 146.14            | 5.57     | 61422  | 3         | 0.00577969        | 2.00173867            |
| Q61462     | Cyba       | Cytochrome b-245 light chain                          | 36.45             | 3.65     | 20748  | 1         | 0.00456931        | 0.56511364            |
| Q05144     | Rac2       | Ras-related C3 botulinum toxin substrate 2            | 569.5             | 55.21    | 21441  | 10        | 0.01077756        | 1.56689397            |
| Q4QRB4     | Tubb3      | Tubulin beta-3 chain                                  | 1717.98           | 38.89    | 50419  | 26        | 0.01288737        | 1.77290912            |
| P0CC09     | Hist2h2aa3 | Histone H2A type 2-A 3                                | 783.08            | 58.46    | 14095  | 9         | 0.02677283        | 0.23753055            |
| Q9WUB4     | Dctn6      | Dynactin subunit 6                                    | 40.93             | 9.47     | 20670  | 1         | 0.01264455        | 2.39060875            |
| A2A432     | Cul4b      | Cullin-4B                                             | 188.72            | 3.2      | 110699 | 4         | 0.03445436        | 1.43655863            |
| Q9QVP9     | Ptk2b      | Protein-tyrosine kinase 2-beta                        | 324.75            | 7.63     | 115794 | 6         | 0.00707352        | 2.14264294            |

|        |           |                                                                                               |         |       |        |    |            |            |
|--------|-----------|-----------------------------------------------------------------------------------------------|---------|-------|--------|----|------------|------------|
| P27601 | Gna13     | Guanine nucleotide-binding protein subunit alpha-13                                           | 45.3    | 2.65  | 44055  | 1  | 0.00744753 | 3.99742208 |
| O35405 | Pld3      | Phospholipase D3                                                                              | 119.57  | 6.97  | 54389  | 2  | 0.01563888 | 1.44538782 |
| Q9CR51 | Atp6v1g1  | V-type proton ATPase subunit G 1                                                              | 237.23  | 36.44 | 13724  | 3  | 0.03411705 | 1.36159699 |
| Q920Q4 | Vps16     | Vacuolar protein sorting-associated protein 16 homolog                                        | 165.2   | 6.2   | 94928  | 3  | 0.00092836 | 3.20800462 |
| O55131 | Sept7     | Septin-7                                                                                      | 558.53  | 28.67 | 50550  | 10 | 0.00421421 | 1.50803424 |
| P40142 | Tkt       | Transketolase                                                                                 | 2339.46 | 60.51 | 67630  | 35 | 0.03312203 | 1.55656044 |
| Q64522 | Hist2h2ab | Histone H2A type 2-B                                                                          | 594.15  | 57.69 | 14013  | 7  | 0.02214729 | 0.15431597 |
| Q9Z0H3 | Smarb1    | SWI/SNF-related matrix-associated actin-dependent regulator of chromatin subfamily B member 1 | 145.36  | 7.79  | 44141  | 2  | 0.04680762 | 0.61691396 |
| Q62625 | Map1lc3b  | Microtubule-associated proteins 1A/1B light chain 3B                                          | 59.17   | 9.86  | 16394  | 2  | 0.02985878 | 2.03107769 |
| Q922Q1 | Marc2     | Mitochondrial amidoxime reducing component 2                                                  | 395.54  | 36.09 | 38194  | 9  | 0.04424054 | 0.69197073 |
| O70133 | Dhx9      | ATP-dependent RNA helicase A                                                                  | 2133.99 | 27.17 | 149475 | 37 | 0.0492269  | 0.71232173 |
| Q9CPQ1 | Cox6c     | Cytochrome c oxidase subunit 6C                                                               | 148.04  | 48.68 | 8469   | 3  | 0.02699581 | 1.51952271 |
| P01900 | H2-D1     | H-2 class I histocompatibility antigen, D-D alpha chain                                       | 494.02  | 31.23 | 41110  | 10 | 0.02204534 | 1.29223611 |
| Q14C51 | Ptcd3     | Pentatricopeptide repeat domain-containing protein 3, mitochondrial                           | 76.14   | 3.5   | 77796  | 2  | 0.00395843 | 1.49459697 |
| Q8QZZ7 | Tprkb     | EKC/KEOPS complex subunit Tprkb                                                               | 127.57  | 10.29 | 19556  | 2  | 0.03190643 | 2.66133625 |
| O89112 | Lanc1l    | LanC-like protein 1                                                                           | 112.57  | 6.02  | 45341  | 2  | 0.00649552 | 3.288913   |
| Q9DBH5 | Lman2     | Vesicular integral-membrane protein VIP36                                                     | 239.28  | 20.67 | 40430  | 5  | 0.02705431 | 1.67948783 |
| O09044 | Snap23    | Synaptosomal-associated protein 23                                                            | 61.12   | 6.67  | 23261  | 1  | 0.02286721 | 1.91126916 |
| B0BNF1 | Sept8     | Septin-8                                                                                      | 301.53  | 17.42 | 51252  | 6  | 0.01391366 | 2.72820171 |
| P05943 | S100a10   | Protein S100-A10                                                                              | 76.63   | 17.89 | 11075  | 1  | 0.00580994 | 2.48181249 |
| P53563 | Bcl2l1    | Bcl-2-like protein 1                                                                          | 131.51  | 14.16 | 26158  | 2  | 0.01703365 | 1.41257646 |
| O54783 | Chkb      | Choline/ethanolamine kinase                                                                   | 56.35   | 5.33  | 45100  | 1  | 0.00099418 | 5.16189275 |
| Q68FR7 | Ltv1      | Protein LTV1 homolog                                                                          | 57.63   | 2.55  | 53562  | 1  | 0.02503165 | 3.09972878 |
| P62960 | Ybx1      | Nuclease-sensitive element-binding protein 1                                                  | 954.34  | 49.07 | 35730  | 11 | 0.01295742 | 1.49139137 |
| Q4V7C7 | Actr3     | Actin-related protein 3                                                                       | 1214.16 | 60.05 | 47357  | 21 | 0.00305077 | 2.00344021 |
| P43247 | Msh2      | DNA mismatch repair protein Msh2                                                              | 690.67  | 13.48 | 104151 | 11 | 0.02770002 | 1.69006561 |
| A9UMV8 | H2afj     | Histone H2A.J                                                                                 | 646.79  | 58.91 | 14045  | 8  | 0.03489401 | 0.26332684 |
| O89017 | Lgmn      | Legumain                                                                                      | 53.01   | 2.76  | 49373  | 1  | 0.00600115 | 3.92173995 |
| Q9D8U8 | Snx5      | Sorting nexin-5                                                                               | 737.63  | 47.77 | 46797  | 15 | 0.01457515 | 1.5952763  |
| Q61390 | Cct6b     | T-complex protein 1 subunit zeta-2                                                            | 295.82  | 13.75 | 58185  | 7  | 0.03118866 | 1.49573849 |
| Q8VDM4 | Psm2      | 26S proteasome non-ATPase regulatory subunit 2                                                | 1200.03 | 30.95 | 100203 | 20 | 0.00692264 | 1.85454293 |
| O35092 | Timm17a   | Mitochondrial import inner membrane translocase subunit Tim17-A                               | 93.75   | 29.82 | 18038  | 2  | 0.03505455 | 0.42592945 |
| P02262 |           | Histone H2A type 1                                                                            | 644.55  | 58.46 | 14077  | 8  | 0.03607446 | 0.26000611 |
| Q9R0C8 | Vav3      | Guanine nucleotide exchange factor VAV3                                                       | 65.16   | 3.54  | 97968  | 2  | 0.00650475 | 1.91878783 |
| Q80Y81 | Elac2     | Zinc phosphodiesterase ELAC protein 2                                                         | 257.12  | 11.07 | 92719  | 7  | 0.04372088 | 1.43106051 |
| P46737 | Brcc3     | Lys-63-specific deubiquitinase BRCC36                                                         | 128.43  | 8.25  | 33340  | 2  | 0.01090307 | 3.6474222  |
| P26645 | Marcks    | Myristoylated alanine-rich C-kinase substrate                                                 | 158.86  | 18.77 | 29661  | 4  | 0.00158242 | 2.1529555  |
| P70699 | Gaa       | Lysosomal alpha-glucosidase                                                                   | 769.46  | 20.25 | 106248 | 12 | 0.01982544 | 1.49557536 |
| O88544 | Cops4     | COP9 signalosome complex subunit 4                                                            | 427.04  | 26.11 | 46285  | 7  | 0.03545119 | 1.73882914 |
| Q7TMQ7 | Wdr91     | WD repeat-containing protein 91                                                               | 206.18  | 7.22  | 83421  | 4  | 0.00393802 | 2.4190404  |
| Q6PFR5 | Tra2a     | Transformer-2 protein homolog alpha                                                           | 175.87  | 11.39 | 32316  | 3  | 0.03268065 | 0.51124908 |
| Q9CQ62 | Decr1     | 2,4-dienoyl-CoA reductase, mitochondrial                                                      | 110.5   | 9.25  | 36214  | 2  | 0.03799681 | 1.89381909 |
| Q8BJ71 | Nup93     | Nuclear pore complex protein Nup93                                                            | 489.85  | 12.7  | 93281  | 10 | 0.0294241  | 1.5971349  |
| Q8C3J5 | Dock2     | Dedicator of cytokinesis protein 2                                                            | 377.72  | 5.36  | 211704 | 8  | 0.00600651 | 2.06353638 |
| P16446 | Pitpna    | Phosphatidylinositol transfer protein alpha isoform                                           | 271.48  | 28.78 | 31907  | 5  | 0.01635808 | 1.86273373 |
| F1LQ48 | Hnrnp1    | Heterogeneous nuclear ribonucleoprotein L                                                     | 1818.88 | 60.03 | 67903  | 26 | 0.03475306 | 0.61432382 |

|        |          |                                                          |          |       |        |    |            |            |
|--------|----------|----------------------------------------------------------|----------|-------|--------|----|------------|------------|
| P18665 | Mrpl3    | 39S ribosomal protein L3, mitochondrial                  | 51.24    | 2.02  | 38253  | 1  | 0.0315131  | 2.95230005 |
| Q8CI08 | Slain2   | SLAIN motif-containing protein 2                         | 79.49    | 4.13  | 62378  | 2  | 0.0092536  | 3.62775023 |
| Q6PB66 | Lrpprc   | Leucine-rich PPR motif-containing protein, mitochondrial | 1213.73  | 19.76 | 156615 | 20 | 0.00224733 | 1.96143756 |
| F1M775 | Diaph1   | Protein diaphanous homolog 1                             | 115.93   | 2.69  | 140409 | 2  | 0.047943   | 2.20412846 |
| P26043 | Rdx      | Radixin                                                  | 1456.89  | 34.82 | 68543  | 26 | 0.04860993 | 1.48873192 |
| Q09014 | Nef1     | Neutrophil cytosol factor 1                              | 306.56   | 13.85 | 44667  | 4  | 0.02946938 | 1.44938631 |
| P68369 | Tuba1a   | Tubulin alpha-1A chain                                   | 2545.34  | 75.61 | 50136  | 37 | 0.03867877 | 1.52460803 |
| Q922L6 | Nelfcd   | Negative elongation factor D                             | 77.28    | 3.05  | 66276  | 2  | 0.00876471 | 3.16344213 |
| Q9DCL9 | Paics    | Multifunctional protein ADE2                             | 593.84   | 32.71 | 47006  | 12 | 0.0217679  | 1.61987506 |
| Q91WM3 | Rrp9     | U3 small nucleolar RNA-interacting protein 2             | 255.29   | 12.63 | 52107  | 6  | 0.03537476 | 0.46356213 |
| Q9CY94 | Gins3    | DNA replication complex GINS protein PSF3                | 56.5     | 7.41  | 24577  | 2  | 0.01137787 | 3.09364573 |
| P62305 | Snrpe    | Small nuclear ribonucleoprotein E                        | 296.15   | 69.57 | 10804  | 6  | 0.01667005 | 0.5738766  |
| P55770 | Snu13    | NHP2-like protein 1                                      | 375.77   | 44.53 | 14174  | 7  | 0.01446369 | 0.74222834 |
| Q9CRB2 | Nhp2     | H/ACA ribonucleoprotein complex subunit 2                | 198.85   | 23.53 | 17247  | 3  | 0.01881052 | 0.28320519 |
| P59999 | Arpe4    | Actin-related protein 2/3 complex subunit 4              | 556.58   | 51.79 | 19667  | 9  | 0.03748189 | 1.3885504  |
| Q9CY57 | Chtop    | Chromatin target of PRMT1 protein                        | 264.65   | 10.44 | 26585  | 3  | 0.03460368 | 0.53418231 |
| Q91W86 | Vps11    | Vacuolar protein sorting-associated protein 11 homolog   | 73       | 3.51  | 107719 | 2  | 0.00515475 | 2.25663666 |
| Q8VDV3 | Rab3il1  | Guanine nucleotide exchange factor for Rab-3A            | 173.82   | 8.09  | 42713  | 2  | 0.02560533 | 1.89937402 |
| Q4V886 | Paf1     | RNA polymerase II-associated factor 1 homolog            | 70.45    | 2.62  | 60546  | 1  | 0.00621353 | 7.5116E-06 |
| O35691 | Pnn      | Pinin                                                    | 286.07   | 7.17  | 82436  | 6  | 0.01367147 | 0.65456988 |
| Q64232 | Tecr     | Very-long-chain enoyl-CoA reductase                      | 149.15   | 7.79  | 36123  | 3  | 0.00514171 | 0.33930562 |
| P09405 | Ncl      | Nucleolin                                                | 2666.021 | 42.15 | 76723  | 40 | 0.00250299 | 0.44677949 |
| Q9D6Y9 | Gbe1     | 1,4-alpha-glucan-branching enzyme                        | 37.14    | 1.85  | 80364  | 1  | 0.03524366 | 2.91185944 |
| P09811 | Pygl     | Glycogen phosphorylase, liver form                       | 145.66   | 3.76  | 97483  | 3  | 0.00199619 | 2.36232798 |
| Q9JK91 | Mlh1     | DNA mismatch repair protein Mlh1                         | 40.28    | 1.05  | 84670  | 1  | 0.03374073 | 3.18003247 |
| Q4FZY0 | Efh2     | EF-hand domain-containing protein D2                     | 1133.68  | 59    | 26759  | 18 | 0.02286848 | 1.60812696 |
| P55194 | Sh3bp1   | SH3 domain-binding protein 1                             | 114.68   | 4.71  | 74172  | 2  | 0.04446756 | 1.84272858 |
| C0HKD8 | Mfap1a   | Microfibrillar-associated protein 1A                     | 146.5    | 9.57  | 51954  | 3  | 0.0272733  | 0.47624901 |
| P20650 | Ppm1a    | Protein phosphatase 1A                                   | 62.49    | 3.14  | 42417  | 1  | 0.01242056 | 1.70081605 |
| P05213 | Tuba1b   | Tubulin alpha-1B chain                                   | 2653.02  | 78.71 | 50152  | 39 | 0.04889328 | 1.50004837 |
| P27661 | H2afx    | Histone H2AX                                             | 530.51   | 52.45 | 15143  | 7  | 0.04647837 | 0.24446847 |
| Q6URK4 | Hnrnpa3  | Heterogeneous nuclear ribonucleoprotein A3               | 1382.9   | 50.66 | 39652  | 24 | 0.03699614 | 0.67466464 |
| O35130 | Emg1     | Ribosomal RNA small subunit methyltransferase NEP1       | 311.22   | 40.16 | 26974  | 6  | 0.01316299 | 0.52782021 |
| P24369 | Ppib     | Peptidyl-prolyl cis-trans isomerase B                    | 682.61   | 51.39 | 23713  | 13 | 0.01595769 | 1.60267003 |
| P35821 | Ptpn1    | Tyrosine-protein phosphatase non-receptor type 1         | 289.01   | 15.51 | 49593  | 5  | 0.03930394 | 1.2438258  |
| P18242 | Ctsd     | Cathepsin D                                              | 1911.02  | 69.27 | 44954  | 30 | 0.04931034 | 1.87718289 |
| Q8BGH2 | Samm50   | Sorting and assembly machinery component 50 homolog      | 636.53   | 35.18 | 51864  | 13 | 0.03099964 | 1.50254686 |
| O08730 | Gyg1     | Glycogenin-1                                             | 50.71    | 3     | 37378  | 1  | 0.02506521 | 2.46067477 |
| O55126 | Nipsnap2 | Protein NipSnap homolog 2                                | 74.39    | 9.25  | 32933  | 2  | 0.02915366 | 1.8834629  |
| Q9D0G0 | Mrps30   | 28S ribosomal protein S30, mitochondrial                 | 146.17   | 7.69  | 49939  | 3  | 0.02544097 | 0.61952284 |
| Q8VCW8 | Acsf2    | Acyl-CoA synthetase family member 2, mitochondrial       | 249.2    | 13.33 | 67951  | 4  | 0.00604673 | 2.54824818 |
| Q8BX09 | Rbbp5    | Retinoblastoma-binding protein 5                         | 134.19   | 5.58  | 59098  | 3  | 0.03816977 | 0.76423784 |
| Q8R5A6 | Tbc1d22a | TBC1 domain family member 22A                            | 40.01    | 1.55  | 59362  | 1  | 0.02233927 | 3.29630895 |
| P0C0S6 | H2afz    | Histone H2A.Z                                            | 523.12   | 56.25 | 13553  | 8  | 0.04821317 | 0.23534126 |
| P51146 | Rab4b    | Ras-related protein Rab-4B                               | 197.1    | 18.78 | 23629  | 3  | 0.00103523 | 2.37296763 |
| Q62639 | Rheb     | GTP-binding protein Rheb                                 | 119.81   | 23.37 | 20479  | 3  | 0.00409952 | 2.40209761 |
| P52760 | Rida     | 2-iminobutanoate/2-iminopropanoate deaminase             | 141.2    | 29.63 | 14255  | 3  | 0.01109614 | 2.70692612 |
| Q810F4 | Fam3c    | Protein FAM3C                                            | 125.28   | 11.01 | 24714  | 2  | 0.04084438 | 1.40936965 |
| Q60866 | Pter     | Phosphotriesterase-related protein                       | 149.41   | 11.75 | 39218  | 3  | 0.00107942 | 2.46095071 |
| Q9D5V5 | Cul5     | Cullin-5                                                 | 113.82   | 3.33  | 90974  | 2  | 0.00289413 | 1.91161365 |

|        |          |                                                         |         |       |        |    |            |            |
|--------|----------|---------------------------------------------------------|---------|-------|--------|----|------------|------------|
| Q9Z204 | Hnrnpc   | Heterogeneous nuclear ribonucleoproteins C1/C2          | 786.93  | 37.7  | 34385  | 12 | 0.02524308 | 0.68455267 |
| P05964 | S100a6   | Protein S100-A6                                         | 256.42  | 40.45 | 10035  | 4  | 0.0298912  | 1.7135163  |
| O89079 | Cope     | Coatomer subunit epsilon                                | 321.85  | 21.75 | 34567  | 4  | 0.0026022  | 2.55870457 |
| P28867 | Prkcd    | Protein kinase C delta type                             | 295.61  | 10.53 | 77547  | 6  | 0.02323535 | 1.7558747  |
| Q8BG51 | Rhot1    | Mitochondrial Rho GTPase 1                              | 172.8   | 5.71  | 72242  | 4  | 0.04731649 | 0.75475694 |
| Q9Z2G9 | Htatip2  | Oxidoreductase HTATIP2                                  | 77.88   | 11.16 | 26870  | 2  | 0.00431992 | 2.11419566 |
| Q5EGY4 | Ykt6     | Synaptobrevin homolog YKT6                              | 151.14  | 22.73 | 22369  | 3  | 0.04042102 | 2.02952281 |
| Q64012 | Raly     | RNA-binding protein Raly                                | 512.55  | 32.37 | 33188  | 9  | 0.03612064 | 0.50908117 |
| O08700 | Vps45    | Vacuolar protein sorting-associated protein 45          | 226.2   | 8.95  | 64894  | 4  | 0.00696473 | 2.28487688 |
| Q9WTX6 | Cul1     | Cullin-1                                                | 158.66  | 8.51  | 89692  | 4  | 0.04313887 | 1.42736334 |
| Q8BK72 | Mrps27   | 28S ribosomal protein S27, mitochondrial                | 146.92  | 9.16  | 47779  | 3  | 0.03844309 | 2.15657913 |
| Q8VE37 | Rcc1     | Regulator of chromosome condensation                    | 719.9   | 32.54 | 44931  | 11 | 0.03905085 | 0.58031362 |
| P01897 | H2-L     | H-2 class I histocompatibility antigen, L-D alpha chain | 177.68  | 13.81 | 40711  | 4  | 0.00180334 | 1.77200512 |
| P62331 | Arf6     | ADP-ribosylation factor 6                               | 340.18  | 30.29 | 20082  | 5  | 0.01142122 | 1.98198103 |
| Q5SF07 | Igf2bp2  | Insulin-like growth factor 2 mRNA-binding protein 2     | 167.13  | 5.74  | 65584  | 4  | 0.03346174 | 1.56202421 |
| Q9R0Q9 | Mpdu1    | Mannose-P-dolichol utilization defect 1 protein         | 113.79  | 10.12 | 26498  | 2  | 0.02204619 | 2.17943983 |
| Q8VE97 | Srsf4    | Serine/arginine-rich splicing factor 4                  | 149.19  | 6.95  | 55979  | 3  | 0.03553438 | 0.65148786 |
| Q6A065 | Cep170   | Centrosomal protein of 170 kDa                          | 124.31  | 1.57  | 175050 | 3  | 0.04973787 | 1.78590461 |
| P97449 | Anpep    | Aminopeptidase N                                        | 185.55  | 3     | 109651 | 2  | 1.9124E-05 | 6.87677242 |
| Q8BTW3 | Exosc6   | Exosome complex component MTR3                          | 56.69   | 5.86  | 28370  | 1  | 0.00691842 | 0.39687868 |
| Q91VM9 | Ppa2     | Inorganic pyrophosphatase 2, mitochondrial              | 78.7    | 8.18  | 38115  | 2  | 0.04918984 | 1.76498144 |
| Q498R3 | Dnajc10  | DnaJ homolog subfamily C member 10                      | 74.22   | 2.14  | 90747  | 2  | 0.00714732 | 2.76740814 |
| Q9EQ06 | Hsd17b11 | Estradiol 17-beta-dehydrogenase 11                      | 108.06  | 11.74 | 32881  | 2  | 0.01566954 | 1.51610485 |
| P61314 | Rpl15    | 60S ribosomal protein L15                               | 571.13  | 48.04 | 24146  | 10 | 0.00154871 | 0.69380028 |
| Q6ZQL4 | Wdr43    | WD repeat-containing protein 43                         | 573.44  | 24.82 | 75381  | 11 | 0.03870463 | 0.54005507 |
| P16045 | Lgals1   | Galectin-1                                              | 590.81  | 54.07 | 14866  | 7  | 0.03699696 | 1.76094566 |
| Q8R164 | Bphl     | Valacyclovir hydrolase                                  | 82.81   | 7.9   | 32851  | 2  | 0.0443709  | 2.18883308 |
| P23249 | Mov10    | Putative helicase MOV-10                                | 135.6   | 4.88  | 113583 | 3  | 0.01394547 | 1.99387735 |
| Q62825 | Exoc3    | Exocyst complex component 3                             | 39.4    | 1.46  | 86497  | 1  | 0.03223375 | 1.89177819 |
| Q58NB6 | Dhrs9    | Dehydrogenase/reductase SDR family member 9             | 52.71   | 3.76  | 35242  | 1  | 0.00188443 | 3.87583856 |
| Q7TSV4 | Pgm2     | Phosphoglucomutase-2                                    | 95.08   | 3.23  | 68748  | 2  | 0.00628131 | 3.07168053 |
| Q9QXZ0 | Macf1    | Microtubule-actin cross-linking factor 1                | 609.27  | 2.18  | 831878 | 12 | 0.01242847 | 1.80689626 |
| Q9D6F9 | Tubb4a   | Tubulin beta-4A chain                                   | 2308.44 | 71.62 | 49586  | 36 | 0.03966064 | 1.5635388  |
| O35326 | Srsf5    | Serine/arginine-rich splicing factor 5                  | 196.89  | 14.5  | 30891  | 4  | 0.03062226 | 0.67863118 |
| P24527 | Lta4h    | Leukotriene A-4 hydrolase                               | 376.51  | 15.06 | 69051  | 7  | 0.0493268  | 1.95638808 |
| Q9CXW2 | Mrps22   | 28S ribosomal protein S22, mitochondrial                | 119.39  | 5.57  | 41192  | 2  | 0.04226864 | 1.41285381 |
| Q8K1X4 | Nckap11  | Nck-associated protein 1-like                           | 521.71  | 11.11 | 128905 | 10 | 0.00161569 | 1.84236785 |
| Q8R5J9 | Arl6ip5  | PRA1 family protein 3                                   | 78.42   | 19.68 | 21558  | 2  | 0.03296697 | 2.0875106  |
| P47738 | Aldh2    | Aldehyde dehydrogenase, mitochondrial                   | 1529.5  | 57.23 | 56538  | 24 | 0.00504484 | 1.61126816 |
| O55142 | Rpl35a   | 60S ribosomal protein L35a                              | 172.8   | 28.18 | 12554  | 5  | 0.01128631 | 0.79779313 |
| Q61703 | Itih2    | Inter-alpha-trypsin inhibitor heavy chain H2            | 136.59  | 4.44  | 105928 | 3  | 0.01766911 | 2.39201642 |
| Q6PDI5 | Ecpas    | Proteasome adapter and scaffold protein ECM29           | 95.38   | 0.98  | 203703 | 2  | 0.01685674 | 2.61295134 |
| Q9JIY5 | Htra2    | Serine protease HTRA2, mitochondrial                    | 173.32  | 17.47 | 49348  | 4  | 0.0337417  | 1.73349812 |
| P68372 | Tubb4b   | Tubulin beta-4B chain                                   | 2882.93 | 83.6  | 49831  | 44 | 0.04463704 | 1.56084533 |
| Q3UQ84 | Tars2    | Threonine--tRNA ligase, mitochondrial                   | 96.72   | 2.63  | 81700  | 2  | 0.04232756 | 1.90073177 |
| Q921I1 | Tf       | Serotransferrin                                         | 119.06  | 4.3   | 76724  | 3  | 0.00793863 | 1.65656428 |
| Q9QXX4 | Slc25a13 | Calcium-binding mitochondrial carrier protein Aralar2   | 1066.73 | 39.5  | 74467  | 20 | 0.0439408  | 1.25555229 |
| Q80VA0 | Galnt7   | N-acetylgalactosaminyltransferase 7                     | 196.84  | 8.98  | 75419  | 4  | 0.00776906 | 1.87753973 |
| Q8R127 | Sccpdh   | Saccharopine dehydrogenase-like oxidoreductase          | 189.76  | 13.75 | 47129  | 4  | 0.02376021 | 1.88335971 |

|        |            |                                                                                                         |         |       |        |    |            |            |
|--------|------------|---------------------------------------------------------------------------------------------------------|---------|-------|--------|----|------------|------------|
| Q510E7 | Tmed9      | Transmembrane emp24 domain-containing protein 9                                                         | 314     | 20    | 27028  | 6  | 0.03796479 | 1.28257335 |
| Q99P91 | Gpnmb      | Transmembrane glycoprotein NMB                                                                          | 156.74  | 7.67  | 63676  | 4  | 2.8021E-05 | 4.17719252 |
| Q922K7 | Nop2       | Probable 28S rRNA (cytosine-C(5))-methyltransferase                                                     | 857.22  | 24.84 | 86752  | 15 | 0.01785066 | 0.67193534 |
| P14152 | Mdh1       | Malate dehydrogenase, cytoplasmic                                                                       | 504.53  | 44.61 | 36511  | 9  | 0.01223572 | 1.96131455 |
| P01896 |            | H-2 class I histocompatibility antigen, alpha chain                                                     | 182.26  | 27.03 | 20454  | 4  | 0.01360889 | 1.66189179 |
| Q9CR59 | Gadd45gpl1 | Growth arrest and DNA damage-inducible proteins-interacting protein 1                                   | 51.98   | 4.05  | 25820  | 1  | 0.02625971 | 1.64051839 |
| Q6PEC4 | Skp1       | S-phase kinase-associated protein 1                                                                     | 199.83  | 20.86 | 18672  | 2  | 0.01806877 | 0.57972029 |
| Q9D8B3 | Chmp4b     | Charged multivesicular body protein 4b                                                                  | 299.1   | 21.43 | 24936  | 4  | 0.03258381 | 1.56955104 |
| Q4V8K2 | Ctnnb1     | Beta-catenin-like protein 1                                                                             | 89.81   | 2.84  | 64948  | 2  | 0.03969234 | 1.48692809 |
| E9PVX6 | Mki67      | Proliferation marker protein Ki-67                                                                      | 2692.99 | 22.88 | 350864 | 50 | 0.00353468 | 0.56124023 |
| Q8BLF1 | Nceh1      | Neutral cholesterol ester hydrolase 1                                                                   | 696.11  | 37.25 | 45740  | 11 | 0.00309767 | 2.21547622 |
| Q8R323 | Rfc3       | Replication factor C subunit 3                                                                          | 205.16  | 11.24 | 40526  | 3  | 0.01276586 | 1.67081911 |
| P17439 | Gba        | Glucosylceramidase                                                                                      | 214.42  | 21.55 | 57622  | 5  | 0.00927505 | 1.77693728 |
| P34960 | Mmp12      | Macrophage metalloelastase                                                                              | 47.02   | 1.69  | 54971  | 1  | 0.0001736  | 9.00525028 |
| O89001 | Cpd        | Carboxypeptidase D                                                                                      | 87.69   | 1.6   | 152406 | 2  | 0.0429091  | 1.81051446 |
| Q921X6 | Polr3f     | DNA-directed RNA polymerase III subunit RPC6                                                            | 38.8    | 3.48  | 35652  | 1  | 0.00363736 | 18.6971306 |
| Q8BP27 | Sfr1       | Swi5-dependent recombination DNA repair protein 1 homolog                                               | 39.05   | 3.76  | 35183  | 1  | 0.04720824 | 2.28584286 |
| O35075 | Dscr3      | Down syndrome critical region protein 3 homolog                                                         | 45.31   | 6.4   | 32970  | 1  | 0.00576954 | 3.95293499 |
| Q920B9 | Supt16h    | FACT complex subunit SPT16                                                                              | 687.13  | 16.62 | 119825 | 13 | 0.01880479 | 1.19954467 |
| Q6P5D8 | Smchd1     | Structural maintenance of chromosomes flexible hinge domain-containing protein 1                        | 692.49  | 7.32  | 225648 | 12 | 0.00755937 | 0.34586263 |
| Q9CPQ8 | Atp5mg     | ATP synthase subunit g, mitochondrial                                                                   | 227     | 33.01 | 11425  | 4  | 0.0276785  | 1.62758949 |
| O88712 | Ctbp1      | C-terminal-binding protein 1                                                                            | 228.09  | 13.83 | 47745  | 5  | 0.01624813 | 1.52507257 |
| P61202 | Cops2      | COP9 signalosome complex subunit 2                                                                      | 73.66   | 2.93  | 51597  | 1  | 0.01055102 | 3.59443156 |
| P19253 | Rpl13a     | 60S ribosomal protein L13a                                                                              | 566.97  | 43.35 | 23464  | 11 | 1.7828E-05 | 0.51772024 |
| P51569 | Gla        | Alpha-galactosidase A                                                                                   | 270.09  | 14.32 | 47643  | 4  | 1.3112E-05 | 3.79340336 |
| Q9D051 | Pdhb       | Pyruvate dehydrogenase E1 component subunit beta, mitochondrial                                         | 542.36  | 25.07 | 38937  | 8  | 0.0208454  | 1.22011726 |
| Q3UW53 | Fam129a    | Protein Niban                                                                                           | 859.21  | 21.6  | 102649 | 18 | 0.02561319 | 1.29952012 |
| Q9EPL9 | Acox3      | Peroxisomal acyl-coenzyme A oxidase 3                                                                   | 253.98  | 11.71 | 78404  | 6  | 0.03756495 | 2.27338738 |
| Q8R307 | Vps18      | Vacuolar protein sorting-associated protein 18 homolog                                                  | 87.02   | 2.47  | 110219 | 2  | 0.00552191 | 2.32395024 |
| Q9WU81 | Slc37a2    | Glucose-6-phosphate exchanger SLC37A2                                                                   | 280.73  | 14.37 | 55073  | 5  | 0.04250166 | 1.38100869 |
| Q9ES97 | Rtn3       | Reticulon-3                                                                                             | 122.99  | 4.98  | 103879 | 2  | 0.00059138 | 1.96933003 |
| O35604 | Npc1       | NPC intracellular cholesterol transporter 1                                                             | 57.72   | 0.94  | 142885 | 1  | 0.00068937 | 2.86849964 |
| Q9D2L9 | Fam111a    | Protein FAM111A                                                                                         | 73      | 2.12  | 69949  | 1  | 0.04993804 | 0.84097345 |
| P51908 | Apobec1    | C->U-editing enzyme APOBEC-1                                                                            | 98.89   | 11.35 | 27522  | 2  | 0.00208591 | 2.64360409 |
| Q6VN19 | Ranbp10    | Ran-binding protein 10                                                                                  | 143.56  | 4.19  | 67188  | 2  | 0.00015698 | 5.23600053 |
| P60898 | Polr2i     | DNA-directed RNA polymerase II subunit RPB9                                                             | 38.02   | 5.6   | 14523  | 1  | 0.04104141 | 0.34710532 |
| P31996 | Cd68       | Macrosialin                                                                                             | 125.97  | 8.9   | 34818  | 3  | 0.00027466 | 1.97812635 |
| Q9QWR8 | Naga       | Alpha-N-acetylgalactosaminidase                                                                         | 395.16  | 23.61 | 47235  | 6  | 0.0050932  | 1.70618512 |
| Q99L04 | Dhrs1      | Dehydrogenase/reductase SDR family member 1                                                             | 287.44  | 28.12 | 34005  | 6  | 0.03069634 | 1.56323738 |
| Q9CQZ6 | Ndufb3     | NADH dehydrogenase [ubiquinone] 1 beta subcomplex subunit 3                                             | 41.01   | 10.58 | 11692  | 1  | 0.04315781 | 2.24488739 |
| Q3TCN2 | Plbd2      | Putative phospholipase B-like 2                                                                         | 104.71  | 4.55  | 66289  | 2  | 0.0210875  | 2.15194453 |
| Q9EPB5 | Serhl      | Serine hydrolase-like protein                                                                           | 45.97   | 2.89  | 35311  | 1  | 0.01241235 | 1.52568388 |
| Q61543 | Glg1       | Golgi apparatus protein 1                                                                               | 951.04  | 17.45 | 133734 | 16 | 0.02830048 | 1.17886713 |
| Q8BMF4 | Dlat       | Dihydrolipoylysine-residue acetyltransferase component of pyruvate dehydrogenase complex, mitochondrial | 479.33  | 18.85 | 67942  | 9  | 0.00762104 | 1.28251584 |
| P35276 | Rab3d      | Ras-related protein Rab-3D                                                                              | 254.56  | 17.81 | 24416  | 4  | 0.03408198 | 1.53232201 |

|        |          |                                                                 |         |       |        |    |            |            |
|--------|----------|-----------------------------------------------------------------|---------|-------|--------|----|------------|------------|
| Q8K411 | Pitrm1   | Presequence protease, mitochondrial                             | 253.68  | 9.46  | 117372 | 6  | 0.03442228 | 2.09191227 |
| Q9CWK3 | Cd2bp2   | CD2 antigen cytoplasmic tail-binding protein 2                  | 89.39   | 7.02  | 37694  | 2  | 0.02106895 | 0.71399831 |
| Q61464 | Znf638   | Zinc finger protein 638                                         | 65.49   | 0.66  | 218134 | 1  | 0.04169636 | 0.19232157 |
| Q64518 | Atp2a3   | Sarcoplasmic/endoplasmic reticulum calcium ATPase 3             | 533.94  | 8     | 113638 | 7  | 0.04440043 | 1.33028394 |
| Q18P16 | Cd84     | SLAM family member 5                                            | 48.89   | 3.34  | 37378  | 1  | 0.04717218 | 2.23764112 |
| P23780 | Glb1     | Beta-galactosidase                                              | 629.76  | 20.25 | 73121  | 11 | 0.0025192  | 1.60490304 |
| Q9Z219 | Sucla2   | Succinate--CoA ligase [ADP-forming] subunit beta, mitochondrial | 277.61  | 12.74 | 50114  | 6  | 0.04442315 | 1.37805426 |
| Q9CPP0 | Npm3     | Nucleoplasmin-3                                                 | 196.37  | 21.14 | 19023  | 3  | 0.00345931 | 0.29316506 |
| Q922U1 | Prpf3    | U4/U6 small nuclear ribonucleoprotein Prp3                      | 179.75  | 6.15  | 77455  | 4  | 0.03945429 | 0.72419451 |
| O08759 | Ube3a    | Ubiquitin-protein ligase E3A                                    | 54.96   | 3.33  | 99819  | 2  | 0.00889535 | 2.37493975 |
| P63081 | Atp6v0c  | V-type proton ATPase 16 kDa proteolipid subunit                 | 322.64  | 31.61 | 15808  | 5  | 0.00034887 | 2.20209311 |
| P56135 | Atp5mf   | ATP synthase subunit f, mitochondrial                           | 131.47  | 23.86 | 10344  | 3  | 0.01000115 | 1.42431291 |
| O08917 | Flot1    | Flotillin-1                                                     | 182.81  | 13.08 | 47513  | 4  | 0.04305257 | 1.61431943 |
| Q8R1I1 | Uqcr10   | Cytochrome b-c1 complex subunit 9                               | 48.11   | 10.94 | 7446   | 1  | 0.03995045 | 1.78206292 |
| Q571E4 | Galns    | N-acetylgalactosamine-6-sulfatase                               | 304.38  | 18.85 | 57673  | 7  | 0.00278567 | 1.86000638 |
| Q8K4Z3 | Naxe     | NAD(P)H-hydrate epimerase                                       | 233.85  | 24.82 | 30973  | 4  | 0.01607626 | 1.7556786  |
| Q9Z1T1 | Ap3b1    | AP-3 complex subunit beta-1                                     | 60.43   | 1.72  | 122740 | 2  | 0.00074245 | 3.663269   |
| G3X982 | Aox3     | Aldehyde oxidase 3                                              | 63.4    | 1.27  | 146902 | 2  | 0.00211969 | 1.96049804 |
| P10107 | Anxa1    | Annexin A1                                                      | 1643.03 | 68.21 | 38734  | 26 | 0.00100283 | 1.52869975 |
| Q9CR68 | Uqcrfs1  | Cytochrome b-c1 complex subunit Rieske, mitochondrial           | 468.94  | 44.89 | 29368  | 7  | 0.01507219 | 0.39010988 |
| P55302 | Lrpap1   | Alpha-2-macroglobulin receptor-associated protein               | 260.71  | 15.28 | 42215  | 6  | 0.00115831 | 1.8812901  |
| Q6P7Q1 | Babam2   | BRISC and BRCA1-A complex member 2                              | 156.94  | 10.18 | 43559  | 3  | 0.03605698 | 2.01016288 |
| O35639 | Anxa3    | Annexin A3                                                      | 1492.23 | 53.25 | 36384  | 23 | 0.00166396 | 1.64168458 |
| Q9D7B6 | Acad8    | Isobutyryl-CoA dehydrogenase, mitochondrial                     | 94.39   | 6.54  | 45020  | 2  | 0.04415912 | 2.19051531 |
| P11240 | Cox5a    | Cytochrome c oxidase subunit 5A, mitochondrial                  | 231.57  | 16.44 | 16130  | 4  | 0.02017298 | 1.41123881 |
| Q07076 | Anxa7    | Annexin A7                                                      | 656     | 21.6  | 49925  | 10 | 0.00237087 | 1.19845911 |
| P24270 | Cat      | Catalase                                                        | 1157.96 | 48.39 | 59795  | 18 | 0.00453172 | 2.34327034 |
| P12265 | Gusb     | Beta-glucuronidase                                              | 1068.84 | 36.27 | 74195  | 19 | 0.01538065 | 1.53805747 |
| Q6NV83 | U2surp   | U2 snRNP-associated SURP motif-containing protein               | 284.9   | 6.9   | 118261 | 7  | 0.03113387 | 1.40876739 |
| P48036 | Anxa5    | Annexin A5                                                      | 1600.34 | 69.91 | 35752  | 25 | 0.00085079 | 1.85406963 |
| Q80W54 | Zmpste24 | CAAX prenyl protease 1 homolog                                  | 109.11  | 7.37  | 54735  | 3  | 0.02756925 | 1.80146834 |
| P13084 | Npm1     | Nucleophosmin                                                   | 1367.38 | 54.45 | 32560  | 20 | 0.02272755 | 0.70893111 |
| Q3UMU9 | Hdgfl2   | Hepatoma-derived growth factor-related protein 2                | 64.15   | 1.35  | 74291  | 1  | 0.00011114 | 0.10374275 |
| Q99LQ7 | Tmem189  | Transmembrane protein 189                                       | 37.2    | 3.69  | 31134  | 1  | 0.00438846 | 1.67376544 |
| P11250 | Rpl34    | 60S ribosomal protein L34                                       | 153.17  | 20.51 | 13507  | 3  | 1.2663E-05 | 0.34866962 |
| Q91YJ2 | Snx4     | Sorting nexin-4                                                 | 51.9    | 2     | 51778  | 1  | 0.0404853  | 2.01679753 |
| Q9D771 | Tmem206  | Transmembrane protein 206                                       | 155.94  | 21.14 | 40178  | 4  | 0.01838677 | 1.7684349  |
| Q3UGP9 | Lrrc58   | Leucine-rich repeat-containing protein 58                       | 61.05   | 6.01  | 40139  | 2  | 0.00829761 | 0.48185285 |
| P61967 | Ap1s1    | AP-1 complex subunit sigma-1A                                   | 35.15   | 4.43  | 18733  | 1  | 0.01378897 | 3.27431889 |
| Q9Z0J0 | Npc2     | NPC intracellular cholesterol transporter 2                     | 125.05  | 24.83 | 16442  | 3  | 0.0019881  | 3.1105686  |
| Q8C1Y8 | Ccz1     | Vacuolar fusion protein CCZ1 homolog                            | 43.23   | 2.71  | 55505  | 1  | 0.00881627 | 3.09008039 |
| P35279 | Rab6a    | Ras-related protein Rab-6A                                      | 581.69  | 35.58 | 23590  | 10 | 0.02788064 | 1.45661079 |
| P35980 | Rpl18    | 60S ribosomal protein L18                                       | 472.26  | 30.85 | 21645  | 7  | 0.00494186 | 0.68155886 |
| Q9QYR9 | Acot2    | Acyl-coenzyme A thioesterase 2, mitochondrial                   | 199.17  | 11.48 | 49657  | 4  | 0.02467854 | 1.62563695 |
| P14106 | C1qb     | Complement C1q subcomponent subunit B                           | 220.41  | 16.6  | 26717  | 4  | 0.04720966 | 0.65262134 |
| D3ZU57 | Riox1    | Ribosomal oxygenase 1                                           | 36.43   | 2.01  | 67455  | 1  | 0.0483792  | 0.16287133 |
| O35955 | Psmb10   | Proteasome subunit beta type-10                                 | 329.37  | 28.57 | 29063  | 5  | 0.02669771 | 0.76397497 |
| O54774 | Ap3d1    | AP-3 complex subunit delta-1                                    | 99.76   | 2.75  | 135081 | 2  | 0.04057704 | 1.98563121 |
| P51863 | Atp6v0d1 | V-type proton ATPase subunit d 1                                | 399.27  | 25.36 | 40301  | 8  | 0.01787113 | 1.91353315 |
| Q66HA6 | Arl8b    | ADP-ribosylation factor-like protein 8B                         | 614.67  | 67.2  | 21539  | 12 | 0.03531184 | 1.57869756 |

|        |        |                                                             |         |       |        |    |            |            |
|--------|--------|-------------------------------------------------------------|---------|-------|--------|----|------------|------------|
| P45952 | Acadm  | Medium-chain specific acyl-CoA dehydrogenase, mitochondrial | 522.56  | 31.12 | 46481  | 11 | 0.02634563 | 1.44040644 |
| Q8C0L0 | Tmx4   | Thioredoxin-related transmembrane protein 4                 | 146.54  | 7.46  | 37131  | 2  | 0.00549224 | 1.32449091 |
| Q0P678 | Zc3h18 | Zinc finger CCCH domain-containing protein 18               | 36.96   | 2.64  | 105694 | 1  | 0.04840894 | 0.08796529 |
| P08905 | Lyz2   | Lysozyme C-2                                                | 288.13  | 31.76 | 16689  | 3  | 0.03393092 | 1.57482452 |
| P51174 | Acadl  | Long-chain specific acyl-CoA dehydrogenase, mitochondrial   | 1052.21 | 40.47 | 47908  | 18 | 0.00904715 | 1.68121502 |
| Q62087 | Pon3   | Serum paraoxonase/lactonase 3                               | 584.62  | 21.19 | 39351  | 8  | 0.01454023 | 1.61671407 |
| P39032 | Rpl36  | 60S ribosomal protein L36                                   | 155.51  | 19.05 | 12268  | 3  | 0.03664268 | 0.69475546 |
| Q9ERG0 | Lima1  | LIM domain and actin-binding protein 1                      | 277.7   | 10.89 | 84060  | 6  | 0.04149077 | 1.56584397 |
| P26350 | Ptma   | Prothymosin alpha                                           | 549.84  | 36.04 | 12254  | 6  | 0.04522971 | 0.50516499 |
| Q9JIK5 | Ddx21  | Nucleolar RNA helicase 2                                    | 2381.58 | 52.53 | 93551  | 39 | 0.01418107 | 0.79888927 |
| O35459 | Ech1   | Delta(3,5)-Delta(2,4)-dienoyl-CoA isomerase, mitochondrial  | 213.73  | 10.4  | 36118  | 3  | 0.02929722 | 1.29278301 |
| P28798 | Grn    | Granulins                                                   | 729.37  | 37.18 | 63458  | 15 | 0.00031945 | 1.64649311 |
| O70370 | Ctss   | Cathepsin S                                                 | 640.11  | 39.12 | 38475  | 8  | 0.03597166 | 1.4549338  |
| Q8BG07 | Pld4   | Phospholipase D4                                            | 797.23  | 31.41 | 56154  | 12 | 0.01824432 | 1.59742702 |
| Q9WUU7 | Ctsz   | Cathepsin Z                                                 | 758.66  | 53.92 | 33996  | 13 | 0.00128586 | 1.46018619 |
