# Supplementary material for: Does size matter? A proteomics-informed comparison of the effects of polystyrene beads of different sizes on macrophages
Source: Royal Society of Chemistry journal article supplement (doi:10.1039/d2en00214k), 2022-01-01
Supplement: d2en00214k16.pdf [file d2en00214k16.pdf]

Supplementary Table 9: results of the pathway analysis by the David tool on the proteins modulated in response to 0.1 µm polystyrene particles

selection of clusters by a FDR cutoff value of 0.1

Annotation Cluster 1 Enrichment Score: 33.88072958076219

| Category         | Term                                                       | Count | %                | PValue               | Genes                                                                                                                                                                                                                                                                                                                                                                                                                                                                                                                                                                                                  | FDR                  |
|------------------|------------------------------------------------------------|-------|------------------|----------------------|--------------------------------------------------------------------------------------------------------------------------------------------------------------------------------------------------------------------------------------------------------------------------------------------------------------------------------------------------------------------------------------------------------------------------------------------------------------------------------------------------------------------------------------------------------------------------------------------------------|----------------------|
| GOTERM_MF_DIRECT | GO:0098641~cadherin binding involved in cell-cell adhesion | 73    | 8.17469204927212 | 8.25764313235833E-38 | Q61510, O70456, Q62448, P19096, Q9Z0P5, Q8BTM8, P12970, Q62167, Q6PAR5, Q80U87, P42225, Q9JHJ0, Q91VX2, Q60902, Q5FWK3, P61027, P25444, P07356, P84228, Q6Y7W8, Q8BH43, Q8BK64, P51432, P30999, Q62418, Q9CPV4, Q6NZJ6, Q8VDJ3, P57776, Q9QXS1, P54823, Q9DBG5, P42932, E9PVA8, O88844, Q9JLQ0, Q922Q8, P60229, Q9WVA4, Q8BVY0, Q9Z0N1, Q6ZQ58, Q78PY7, Q62261, Q9JKF1, Q7TQH0, Q99K01, Q9CWJ9, P63101, A2AGT5, Q8VDD5, Q9QYJ3, O54988, Q8K298, Q2L4X1, P62259, Q80UG5, P26039, Q9Z0G0, Q3UZ39, Q9CQV8, Q8CI51, Q9D8N0, Q9CZ30, Q9EQP2, Q3UEB3, P60122, P58252, P17182, P22682, Q9WUA3, Q8CIN4, Q9D0I9 | 3.77787173305394E-35 |
|                  |                                                            |       |                  |                      | Q61510, O70456, Q62448, P19096, Q9Z0P5, Q8BTM8, P12970, Q62167, Q6PAR5, Q80U87, P42225, Q9JHJ0, Q91VX2, Q60902, Q5FWK3, P61027, P25444, P07356, P84228, Q6Y7W8, Q8BH43, Q8BK64, P51432, P30999, Q62418, Q9CPV4, Q6NZJ6, Q8VDJ3, P57776, Q9QXS1, P54823, Q9DBG5, P42932, E9PVA8, O88844, Q9JLQ0, Q922Q8, P60229, Q9WVA4, Q8BVY0, Q9Z0N1, Q6ZQ58, Q78PY7, Q62261, Q9JKF1, Q7TQH0, Q99K01, Q9CWJ9, P63101, A2AGT5, Q8VDD5, Q9QYJ3, O54988, Q8K298, Q2L4X1, P62259, Q80UG5, P26039, Q9Z0G0, Q3UZ39, Q9CQV8, Q8CI51, Q9D8N0, Q9CZ30, Q9EQP2, Q3UEB3, P60122, P58252, P17182, P22682, Q9WUA3, Q8CIN4, Q9D0I9 |                      |
|                  |                                                            |       |                  |                      | O70456, Q62448, Q9Z0P5, P12970, Q6PAR5, Q80U87, P42225, Q91VX2, Q60902, Q5FWK3, P61027, P25444, P84228, Q6Y7W8, Q8BH43, Q8BK64, P51432, Q62418, Q9CPV4, Q6NZJ6, Q8VDJ3, P57776, Q9QXS1, P54823, Q9DBG5, O88844, Q922Q8, P60229, Q9WVA4, Q9Z0N1, Q6ZQ58, Q78PY7, Q7TQH0, Q99K01, Q9CWJ9, P63101, A2AGT5, Q9QYJ3, O54988, Q8K298, Q2L4X1, P26039, Q9Z0G0, Q3UZ39, Q9CQV8, Q8CI51, Q9D8N0, Q9CZ30, Q9EQP2, Q3UEB3, P17182, Q9WUA3, Q9D0I9                                                                                                                                                                 |                      |
| GOTERM_CC_DIRECT | GO:0005913~cell-cell adherens junction                     | 73    | 8.17469204927212 | 2.26018500126768E-36 | Q61510, O70456, Q62448, P19096, Q9Z0P5, Q8BTM8, P12970, Q62167, Q6PAR5, Q80U87, P42225, Q9JHJ0, Q91VX2, Q60902, Q5FWK3, P61027, P25444, P07356, P84228, Q6Y7W8, Q8BH43, Q8BK64, P51432, P30999, Q62418, Q9CPV4, Q6NZJ6, Q8VDJ3, P57776, Q9QXS1, P54823, Q9DBG5, P42932, E9PVA8, O88844, Q9JLQ0, Q922Q8, P60229, Q9WVA4, Q8BVY0, Q9Z0N1, Q6ZQ58, Q78PY7, Q62261, Q9JKF1, Q7TQH0, Q99K01, Q9CWJ9, P63101, A2AGT5, Q8VDD5, Q9QYJ3, O54988, Q8K298, Q2L4X1, P62259, Q80UG5, P26039, Q9Z0G0, Q3UZ39, Q9CQV8, Q8CI51, Q9D8N0, Q9CZ30, Q9EQP2, Q3UEB3, P60122, P58252, P17182, P22682, Q9WUA3, Q8CIN4, Q9D0I9 | 2.92128911413847E-34 |
|                  |                                                            |       |                  |                      | Q61510, O70456, Q62448, P19096, Q9Z0P5, Q8BTM8, P12970, Q62167, Q6PAR5, Q80U87, P42225, Q9JHJ0, Q91VX2, Q60902, Q5FWK3, P61027, P25444, P07356, P84228, Q6Y7W8, Q8BH43, Q8BK64, P51432, P30999, Q62418, Q9CPV4, Q6NZJ6, Q8VDJ3, P57776, Q9QXS1, P54823, Q9DBG5, O88844, Q922Q8, P60229, Q9WVA4, Q9Z0N1, Q6ZQ58, Q78PY7, Q7TQH0, Q99K01, Q9CWJ9, P63101, A2AGT5, Q9QYJ3, O54988, Q8K298, Q2L4X1, P26039, Q9Z0G0, Q3UZ39, Q9CQV8, Q8CI51, Q9D8N0, Q9CZ30, Q9EQP2, Q3UEB3, P17182, Q9WUA3, Q9D0I9                                                                                                         |                      |
|                  |                                                            |       |                  |                      | O70456, Q62448, Q9Z0P5, P12970, Q6PAR5, Q80U87, P42225, Q91VX2, Q60902, Q5FWK3, P61027, P25444, P84228, Q6Y7W8, Q8BH43, Q8BK64, P51432, Q62418, Q9CPV4, Q6NZJ6, Q8VDJ3, P57776, Q9QXS1, P54823, Q9DBG5, O88844, Q922Q8, P60229, Q9WVA4, Q9Z0N1, Q6ZQ58, Q78PY7, Q7TQH0, Q99K01, Q9CWJ9, P63101, A2AGT5, Q9QYJ3, O54988, Q8K298, Q2L4X1, P26039, Q9Z0G0, Q3UZ39, Q9CQV8, Q8CI51, Q9D8N0, Q9CZ30, Q9EQP2, Q3UEB3, P17182, Q9WUA3, Q9D0I9                                                                                                                                                                 |                      |
| GOTERM_BP_DIRECT | GO:0098609~cell-cell adhesion                              | 53    | 5.93505039193729 | 1.22126850950545E-29 | Q61510, O70456, Q62448, P19096, Q9Z0P5, Q8BTM8, P12970, Q62167, Q6PAR5, Q80U87, P42225, Q9JHJ0, Q91VX2, Q60902, Q5FWK3, P61027, P25444, P07356, P84228, Q6Y7W8, Q8BH43, Q8BK64, P51432, Q62418, Q9CPV4, Q6NZJ6, Q8VDJ3, P57776, Q9QXS1, P54823, Q9DBG5, O88844, Q922Q8, P60229, Q9WVA4, Q9Z0N1, Q6ZQ58, Q78PY7, Q7TQH0, Q99K01, Q9CWJ9, P63101, A2AGT5, Q9QYJ3, O54988, Q8K298, Q2L4X1, P26039, Q9Z0G0, Q3UZ39, Q9CQV8, Q8CI51, Q9D8N0, Q9CZ30, Q9EQP2, Q3UEB3, P17182, Q9WUA3, Q9D0I9                                                                                                                 | 3.00798433891192E-26 |
|                  |                                                            |       |                  |                      | Q61510, O70456, Q62448, P19096, Q9Z0P5, Q8BTM8, P12970, Q62167, Q6PAR5, Q80U87, P42225, Q9JHJ0, Q91VX2, Q60902, Q5FWK3, P61027, P25444, P07356, P84228, Q6Y7W8, Q8BH43, Q8BK64, P51432, Q62418, Q9CPV4, Q6NZJ6, Q8VDJ3, P57776, Q9QXS1, P54823, Q9DBG5, O88844, Q922Q8, P60229, Q9WVA4, Q9Z0N1, Q6ZQ58, Q78PY7, Q7TQH0, Q99K01, Q9CWJ9, P63101, A2AGT5, Q9QYJ3, O54988, Q8K298, Q2L4X1, P26039, Q9Z0G0, Q3UZ39, Q9CQV8, Q8CI51, Q9D8N0, Q9CZ30, Q9EQP2, Q3UEB3, P17182, Q9WUA3, Q9D0I9                                                                                                                 |                      |
|                  |                                                            |       |                  |                      | O70456, Q62448, Q9Z0P5, P12970, Q6PAR5, Q80U87, P42225, Q91VX2, Q60902, Q5FWK3, P61027, P25444, P84228, Q6Y7W8, Q8BH43, Q8BK64, P51432, Q62418, Q9CPV4, Q6NZJ6, Q8VDJ3, P57776, Q9QXS1, P54823, Q9DBG5, O88844, Q922Q8, P60229, Q9WVA4, Q9Z0N1, Q6ZQ58, Q78PY7, Q7TQH0, Q99K01, Q9CWJ9, P63101, A2AGT5, Q9QYJ3, O54988, Q8K298, Q2L4X1, P26039, Q9Z0G0, Q3UZ39, Q9CQV8, Q8CI51, Q9D8N0, Q9CZ30, Q9EQP2, Q3UEB3, P17182, Q9WUA3, Q9D0I9                                                                                                                                                                 |                      |

Annotation Cluster 2 Enrichment Score: 21.388455818116206

| Category | Term | Count | % | PValue | Genes | FDR |
|----------|------|-------|---|--------|-------|-----|
|----------|------|-------|---|--------|-------|-----|

|             |                    |     |                  |                      |                                                                                                                                                                                                                                                                                                                                                                                                                                                                                                                                                                                                                                                                                                                                                                                                                                                                                                                                                                                                                                                                                                                                                                                                                                                                                                                                               |                      |
|-------------|--------------------|-----|------------------|----------------------|-----------------------------------------------------------------------------------------------------------------------------------------------------------------------------------------------------------------------------------------------------------------------------------------------------------------------------------------------------------------------------------------------------------------------------------------------------------------------------------------------------------------------------------------------------------------------------------------------------------------------------------------------------------------------------------------------------------------------------------------------------------------------------------------------------------------------------------------------------------------------------------------------------------------------------------------------------------------------------------------------------------------------------------------------------------------------------------------------------------------------------------------------------------------------------------------------------------------------------------------------------------------------------------------------------------------------------------------------|----------------------|
| UP_KEYWORDS | Nucleotide-binding | 161 | 18.0291153415454 | 5.43175311558991E-33 | <p>Q9JMH9, Q8K1R7, Q8CG48, Q61316, Q5U3K5, Q9WTP7, Q8K1J6, Q9DBL7, Q922B2, P11440, Q61035, P68181, Q61036, P12382, Q9EPU0, Q8BML9, Q9JLV6, P62196, Q62095, Q05D44, Q6P9R2, P61027, P49138, P46664, Q8BU30, Q569Z6, Q9DBC7, Q9QXB9, P58389, Q03265, Q9WUK4, Q9ER72, P18654, Q02053, Q68FL6, Q8K183, O88685, Q9JHU4, P32921, Q61655, Q6P9P6, Q6P3D0, Q91VR5, Q61656, Q9Z255, Q2NL51, Q80X41, Q5SUR0, Q8CGC7, Q8VDD5, Q9CZD3, Q91V92, Q8BMJ2, P04184, P26638, Q8CFI2, Q80UG5, Q9CZ30, Q3V1L4, P97855, P32233, Q6PA06, Q9D2R0, O54950, P60122, P33174, Q64261, Q04447, Q99LE6, Q9D1G2, Q8BH69, Q8CIN4, Q3UFY7, P07742, P54775, Q8BFR5, P97386, Q8C0C7, B2RQC6, P46471, Q61879, Q9D2Y4, P37913, Q8VE47, Q9CS42, Q62167, P63085, P61222, Q9Z1F9, Q3THS6, P46467, P05132, Q8R1Q8, Q9WV85, Q91WQ3, P97311, Q3TRM8, Q9WTM5, O08638, P61082, P70698, P54823, P35601, P42932, Q8R050, Q68FH4, P61750, Q8BP47, Q61699, P28740, P54276, Q9Z0N1, O70551, Q9R0N0, P11983, P50516, P70248, P31750, Q922D8, Q9JM14, P49718, O54984, Q04899, Q03963, P61087, Q9QUJ7, O54988, P62334, Q9D7H3, O35626, P80315, P97494, P80314, Q9Z1Q9, Q9ESL4, Q9CQN1, P80313, Q64737, Q61183, P97930, P51855, Q9EQP2, P62192, Q99M31, Q3THK7, O08810, Q3UM18, Q9D0R2, Q9WUA2, P47809, P58252, P84078, P51859, Q6URW6, Q9WUA3, P80318, P80317, Q6P542, Q8BGQ7, Q9D0I9, P80316</p> | 3.82938594649088E-31 |
|             |                    |     |                  |                      | <p>Q9JMH9, Q8K1R7, Q8CG48, Q61316, Q8K1J6, Q9DBL7, Q922B2, P11440, Q61035, P68181, Q61036, P12382, Q9EPU0, Q8BML9, Q9JLV6, P62196, Q62095, Q6P9R2, P49138, Q8BU30, Q569Z6, P58389, Q03265, Q9WUK4, Q9ER72, P18654, Q02053, Q68FL6, Q8K183, O88685, Q9JHU4, P32921, Q61655, Q6P9P6, Q91VR5, Q61656, Q9Z255, Q2NL51, Q80X41, Q5SUR0, Q8CGC7, Q8VDD5, Q9CZD3, Q91V92, Q8BMJ2, P04184, P26638, Q8CFI2, Q9CZ30, P97855, Q9D2R0, O54950, P60122, P33174, Q64261, Q04447, Q99LE6, Q9D1G2, Q8BH69, Q8CIN4, P07742, P54775, P97386, Q8C0C7, B2RQC6, P46471, Q61879, Q9D2Y4, P37913, Q8VE47, Q9CS42, Q62167, P63085, P61222, Q9Z1F9, Q3THS6, P46467, P05132, Q8R1Q8, Q9WV85, Q91WQ3, P97311, Q3TRM8, Q9WTM5, O08638, P61082, P70698, P54823, P35601, P42932, Q68FH4, Q8BP47, Q61699, P28740, P54276, O70551, Q9R0N0, P11983, P50516, P70248, P31750, Q922D8, P49718, O54984, Q04899, Q03963, P61087, Q9QUJ7, O54988, P62334, Q9D7H3, P80315, P97494, P80314, Q9Z1Q9, Q9ESL4, Q9CQN1, P80313, Q64737, Q61183, P97930, P51855, Q9EQP2, P62192, Q99M31, Q3THK7, Q9D0R2, Q9WUA2, P47809, Q6URW6, Q9WUA3, P80318, P80317, Q6P542, Q8BGQ7, Q9D0I9, P80316</p>                                                                                                                                                                                                 |                      |
| UP_KEYWORDS | ATP-binding        | 137 | 15.3415453527436 | 9.12062341842937E-32 | <p>Q9JMH9, Q8K1R7, Q8CG48, Q61316, Q8K1J6, Q9DBL7, Q922B2, P11440, Q61035, P68181, Q61036, P12382, Q9EPU0, Q8BML9, Q9JLV6, P62196, Q62095, Q6P9R2, P49138, Q8BU30, Q569Z6, P58389, Q03265, Q9WUK4, Q9ER72, P18654, Q02053, Q68FL6, Q8K183, O88685, Q9JHU4, P32921, Q61655, Q6P9P6, Q91VR5, Q61656, Q9Z255, Q2NL51, Q80X41, Q5SUR0, Q8CGC7, Q8VDD5, Q9CZD3, Q91V92, Q8BMJ2, P04184, P26638, Q8CFI2, Q9CZ30, P97855, Q9D2R0, O54950, P60122, P33174, Q64261, Q04447, Q99LE6, Q9D1G2, Q8BH69, Q8CIN4, P07742, P54775, P97386, Q8C0C7, B2RQC6, P46471, Q61879, Q9D2Y4, P37913, Q8VE47, Q9CS42, Q62167, P63085, P61222, Q9Z1F9, Q3THS6, P46467, P05132, Q8R1Q8, Q9WV85, Q91WQ3, P97311, Q3TRM8, Q9WTM5, O08638, P61082, P70698, P54823, P35601, P42932, Q68FH4, Q8BP47, Q61699, P28740, P54276, O70551, Q9R0N0, P11983, P50516, P70248, P31750, Q922D8, P49718, O54984, Q04899, Q03963, P61087, Q9QUJ7, O54988, P62334, Q9D7H3, P80315, P97494, P80314, Q9Z1Q9, Q9ESL4, Q9CQN1, P80313, Q64737, Q61183, P97930, P51855, Q9EQP2, P62192, Q99M31, Q3THK7, Q9D0R2, Q9WUA2, P47809, Q6URW6, Q9WUA3, P80318, P80317, Q6P542, Q8BGQ7, Q9D0I9, P80316</p>                                                                                                                                                                                                 | 5.14403160799416E-30 |
|             |                    |     |                  |                      | <p>Q9JMH9, Q8K1R7, Q8CG48, Q61316, Q8K1J6, Q9DBL7, Q922B2, P11440, Q61035, P68181, Q61036, P12382, Q9EPU0, Q8BML9, Q9JLV6, P62196, Q62095, Q6P9R2, P49138, Q8BU30, Q569Z6, P58389, Q03265, Q9WUK4, Q9ER72, P18654, Q02053, Q68FL6, Q8K183, O88685, Q9JHU4, P32921, Q61655, Q6P9P6, Q91VR5, Q61656, Q9Z255, Q2NL51, Q80X41, Q5SUR0, Q8CGC7, Q8VDD5, Q9CZD3, Q91V92, Q8BMJ2, P04184, P26638, Q8CFI2, Q9CZ30, P97855, Q9D2R0, O54950, P60122, P33174, Q64261, Q04447, Q99LE6, Q9D1G2, Q8BH69, Q8CIN4, P07742, P54775, P97386, Q8C0C7, B2RQC6, P46471, Q61879, Q9D2Y4, P37913, Q8VE47, Q9CS42, Q62167, P63085, P61222, Q9Z1F9, Q3THS6, P46467, P05132, Q8R1Q8, Q9WV85, Q91WQ3, P97311, Q3TRM8, Q9WTM5, O08638, P61082, P70698, P54823, P35601, P42932, Q68FH4, Q8BP47, Q61699, P28740, P54276, O70551, Q9R0N0, P11983, P50516, P70248, P31750, Q922D8, P49718, O54984, Q04899, Q03963, P61087, Q9QUJ7, O54988, P62334, Q9D7H3, P80315, P97494, P80314, Q9Z1Q9, Q9ESL4, Q9CQN1, P80313, Q64737, Q61183, P97930, P51855, Q9EQP2, P62192, Q99M31, Q3THK7, Q9D0R2, Q9WUA2, P47809, Q6URW6, Q9WUA3, P80318, P80317, Q6P542, Q8BGQ7, Q9D0I9, P80316</p>                                                                                                                                                                                                 |                      |

|                                               |     |                 |                      |                                                                                                                                                                                                                                                                                                                                                                                                                                                                                                                                                                                                                                                                                                                                                                                                                                                                                                                                                                                                                                                                                                                                                                                                                                                                                                                                                                                                                                                                                       |                      |
|-----------------------------------------------|-----|-----------------|----------------------|---------------------------------------------------------------------------------------------------------------------------------------------------------------------------------------------------------------------------------------------------------------------------------------------------------------------------------------------------------------------------------------------------------------------------------------------------------------------------------------------------------------------------------------------------------------------------------------------------------------------------------------------------------------------------------------------------------------------------------------------------------------------------------------------------------------------------------------------------------------------------------------------------------------------------------------------------------------------------------------------------------------------------------------------------------------------------------------------------------------------------------------------------------------------------------------------------------------------------------------------------------------------------------------------------------------------------------------------------------------------------------------------------------------------------------------------------------------------------------------|----------------------|
| GOTERM_MF_DIRECTGO:0000166~nucleotide binding | 178 | 19.93281075028  | 1.89087123323823E-26 | <p>Q9JMH9, Q8K1R7, Q8CG48, Q61316, Q5U3K5, Q9WTP7, Q8K1J6, Q9DBL7, Q922B2, P11440, Q61035, P68181, Q61036, P12382, Q9EPU0, Q9JLV6, P62196, Q62095, Q05D44, Q6P9R2, P61027, P49138, P46664, Q8BU30, Q569Z6, Q9DBC7, Q9QXB9, P58389, Q03265, Q9WUK4, Q9ER72, P18654, Q02053, Q68FL6, Q8K183, O88685, Q9JHU4, P32921, Q61655, Q6P9P6, Q6P3D0, Q91VR5, Q61656, Q9Z255, Q2NL51, Q80X41, Q99K48, Q9Z1D1, Q62189, Q5SUR0, Q8CGC7, Q8VDD5, Q9CZD3, Q91V92, Q8BMJ2, Q6NVF9, P04184, P26638, O35309, Q8CFI2, Q80UG5, Q9CZ30, Q3V1L4, P97855, P32233, Q6PA06, Q9D2R0, O54950, O08583, P60122, P33174, Q64261, Q04447, Q8R4X3, Q99LE6, Q9D1G2, Q8BH69, Q8CIN4, Q3UFY7, Q9CQI7, P07742, P54775, Q8BFR5, P97386, Q8C0C7, B2RQC6, P46471, Q61879, Q9D2Y4, P37913, Q8VE47, Q9CS42, Q62167, P63085, P61222, Q9Z1F9, Q3THS6, P46467, P05132, Q8R1Q8, Q9WV85, Q91WQ3, Q9CPN8, P97311, Q3TRM8, P29341, Q9JL18, Q6PDM2, Q9WTM5, O08638, Q6A0A2, P61082, P70698, P54823, P35601, P42932, Q8R050, Q68FH4, P61750, Q8BP47, Q61699, P28740, P54276, Q9Z0N1, O70551, Q8R3C6, Q9R0N0, P11983, P50516, P70248, P31750, Q922D8, Q9JM14, P49718, O54984, Q04899, Q03963, P61087, Q9QUJ7, O54988, P62334, Q9D7H3, O35626, P80315, P97494, P80314, Q9Z1Q9, Q9ESL4, Q9CQN1, P80313, Q64737, P97379, Q61183, P97930, P51855, Q9EQP2, P62192, Q99020, Q99M31, Q3THK7, Q3UEB3, O08810, Q3UM18, Q9D0R2, Q9WUA2, P47809, P58252, P84078, P51859, Q6URW6, P24547, Q9WUA3, P80318, P80317, Q6P542, Q8BGQ7, Q9D0I9, P80316</p> | 5.76715726137661E-24 |
| GOTERM_MF_DIRECTGO:0005524~ATP binding        | 143 | 16.013437849944 | 3.54161757023658E-22 | <p>Q9JMH9, Q8K1R7, Q8CG48, Q61316, Q9Z0P5, Q9WTP7, Q8K1J6, Q9DBL7, Q922B2, P11440, Q61035, P68181, Q61036, P12382, Q9EPU0, Q8BML9, Q9JLV6, P62196, Q62095, Q6P9R2, P49138, Q8BU30, Q569Z6, P58389, Q03265, Q9WUK4, Q9ER72, P18654, Q02053, Q68FL6, Q8K183, O88685, Q9JHU4, P32921, Q9CXY6, Q61655, Q6P9P6, Q91VR5, Q61656, Q9Z255, Q2NL51, Q80X41, Q5SUR0, Q8CGC7, Q8VDD5, Q9CZD3, Q91V92, Q8BMJ2, P04184, P26638, Q8CFI2, Q8BH61, Q9CZ30, P97855, Q9D2R0, O54950, P60122, P33174, Q64261, Q04447, Q9DBQ7, Q99LE6, Q9D1G2, Q8BH69, Q8CIN4, P07742, P54775, P97386, Q8C0C7, B2RQC6, P46471, Q61879, Q9D2Y4, P37913, Q8VE47, Q9CS42, Q62167, P63085, P61222, Q9Z1F9, Q3THS6, P46467, P05132, Q8R1Q8, Q9WV85, Q91WQ3, P97311, Q3TRM8, Q9WTM5, O08638, P61082, P70698, P54823, P35601, P42932, Q68FH4, Q8BP47, Q61699, P28740, P54276, O70551, Q9R0N0, P11983, P50516, P70248, P31750, Q922D8, P49718, O54984, Q04899, Q03963, P61087, Q9QYJ0, Q9QUJ7, O54988, P62334, Q9D7H3, P80315, P97494, P80314, Q9Z1Q9, Q9ESL4, Q9CQN1, P80313, Q64737, Q61183, P97930, P51855, Q9EQP2, P62192, Q99M31, Q3THK7, Q9D0R2, Q9WUA2, P47809, Q6URW6, Q9WUA3, P80318, P80317, Q6P542, Q8BGQ7, Q9D0I9, P80316</p>                                                                                                                                                                                                                                                                                         | 6.48116015353294E-20 |

|                             |                                                               |       |                  |                      |                                                                                                                                                                                                                                                                                                                                                                                                                                                                                                                                                                                                                                                                                                        |                      |
|-----------------------------|---------------------------------------------------------------|-------|------------------|----------------------|--------------------------------------------------------------------------------------------------------------------------------------------------------------------------------------------------------------------------------------------------------------------------------------------------------------------------------------------------------------------------------------------------------------------------------------------------------------------------------------------------------------------------------------------------------------------------------------------------------------------------------------------------------------------------------------------------------|----------------------|
| UP_SEQ_FEATURE              | nucleotide phosphate-binding region:ATP                       | 85    | 9.51847704367301 | 5.19573859541068E-11 | P54775, Q8CG48, Q9JMH9, Q8K1R7, P46471, Q61879, Q9DBL7, Q62167, Q9CS42, P11440, P68181, Q61036, P12382, Q9EPU0, Q9JLV6, P63085, P62196, Q62095, Q3THS6, Q9Z1F9, Q6P9R2, P49138, P46467, P05132, Q8R1Q8, Q569Z6, P97311, Q3TRM8, Q03265, Q9WTM5, O08638, Q9WUK4, P54823, P18654, P35601, Q02053, Q68FH4, Q8K183, O88685, Q9JHU4, Q6P9P6, Q61655, Q91VR5, Q61656, P28740, P54276, O70551, Q2NL51, Q80X41, Q9R0N0, P50516, P70248, P31750, Q5SUR0, Q922D8, P49718, Q8CGC7, Q8VDD5, Q9CZD3, O54984, Q91V92, Q03963, Q04899, O54988, P04184, P26638, P62334, Q9ESL4, Q64737, Q9CZ30, P97930, P51855, Q9EQP2, P62192, Q3THK7, P47809, P60122, P33174, Q64261, Q04447, Q6URW6, Q9D1G2, Q8BH69, Q9WUA3, Q8CIN4 | 1.02304092943636E-07 |
|                             |                                                               |       |                  |                      | P54775, Q8CG48, Q8BFR5, Q9JMH9, P46471, Q61879, Q5U3K5, Q9WTP7, Q9DBL7, Q62167, Q9EPU0, Q9JLV6, P61222, P62196, Q62095, Q05D44, P61027, P46467, P46664, Q8R1Q8, P97311, Q9QXB9, Q03265, Q9WTM5, O08638, Q9WUK4, P54823, P70698, P35601, Q8R050, P61750, O88685, Q9JHU4, Q6P9P6, Q61655, Q91VR5, Q61656, P28740, P54276, Q9Z0N1, Q9JKF1, P50516, P70248, Q922D8, P49718, Q8VDD5, O54984, P04184, P62334, Q00P19, Q80UG5, O35626, Q9CZ30, P97930, P32233, Q9EQP2, Q6PA06, P62192, O08810, Q3UM18, P60122, P33174, P58252, P84078, Q6URW6, Q99LE6, Q9D1G2, Q6P542                                                                                                                                         |                      |
| INTERPRO                    | IPR027417:P-loop containing nucleoside triphosphate hydrolase | 68    | 7.61478163493841 | 2.70887916785413E-08 |                                                                                                                                                                                                                                                                                                                                                                                                                                                                                                                                                                                                                                                                                                        | 4.42149277508635E-06 |
| <b>Annotation Cluster 3</b> |                                                               |       |                  |                      |                                                                                                                                                                                                                                                                                                                                                                                                                                                                                                                                                                                                                                                                                                        |                      |
| Category                    | Enrichment Score: 8.540858437494068<br>Term                   | Count | %                | PValue               | Genes                                                                                                                                                                                                                                                                                                                                                                                                                                                                                                                                                                                                                                                                                                  | FDR                  |
| UP_KEYWORDS                 | Protein biosynthesis                                          | 43    | 4.81522956326988 | 1.04429686114307E-27 | P32921, Q8BFR5, Q62448, P10711, Q9Z0N1, Q8C0C7, O70194, P31230, Q9DCH4, Q9Z1D1, Q922B2, Q61035, Q8CGC7, Q8BML9, Q9CZD3, Q03963, Q8BMJ2, P63242, Q8BMJ3, Q05D44, P26638, Q8BU30, Q9Z1Q9, Q91WQ3, Q99JX4, Q9D8N0, Q99LC8, Q6NZJ6, Q8R1B4, Q9ER72, P57776, O08810, Q9D0R2, Q68FL6, Q9WUA2, Q8R050, Q8BP47, P58252, Q61749, P23116, P60229, Q8BGQ7, Q9D0I9                                                                                                                                                                                                                                                                                                                                                 | 4.90819524737241E-26 |
| UP_KEYWORDS                 | Aminoacyl-tRNA synthetase                                     | 19    | 2.12765957446808 | 3.50251491486403E-17 | P32921, Q9Z1Q9, Q91WQ3, Q8C0C7, Q922B2, Q9ER72, Q61035, Q9D0R2, Q68FL6, Q8CGC7, Q9WUA2, Q8BML9, Q8BP47, Q9CZD3, Q8BMJ2, P26638, Q8BU30, Q8BGQ7, Q9D0I9                                                                                                                                                                                                                                                                                                                                                                                                                                                                                                                                                 | 8.97917459992415E-16 |
| GOTERM_MF_DIRECT            | GO:0004812~aminoacyl-tRNA ligase activity                     | 19    | 2.12765957446808 | 2.18751227150796E-15 | P32921, Q9Z1Q9, Q91WQ3, Q8BH61, Q8C0C7, Q922B2, Q9ER72, Q61035, Q9D0R2, Q68FL6, Q8CGC7, Q9WUA2, Q8BP47, Q9CZD3, Q8BMJ2, P26638, Q8BU30, Q8BGQ7, Q9D0I9                                                                                                                                                                                                                                                                                                                                                                                                                                                                                                                                                 | 2.85939104061398E-13 |
| GOTERM_BP_DIRECT            | GO:0006418~tRNA aminoacylation for protein translation        | 18    | 2.01567749160134 | 4.8898385307608E-15  | P32921, Q9Z1Q9, Q91WQ3, Q8BH61, P31230, Q922B2, Q9ER72, Q61035, Q9D0R2, Q68FL6, Q8CGC7, Q8BML9, Q8BP47, Q9CZD3, Q8BMJ2, P26638, Q8BU30, Q9D0I9                                                                                                                                                                                                                                                                                                                                                                                                                                                                                                                                                         | 4.01455743375462E-12 |
| UP_KEYWORDS                 | Ligase                                                        | 43    | 4.81522956326988 | 8.99331198749337E-14 | P32921, Q61510, P97386, Q9R1T2, B2RQC6, Q8C0C7, Q922B2, P37913, A2AN08, Q61035, Q5SUR0, Q922D8, Q99PP7, Q8CGC7, Q8BML9, Q9CZD3, Q99KP6, Q8BMJ2, Q9Z1F9, Q9QUJ7, P26638, P46664, Q8BU30, Q9D7H3, P97494, Q9Z1Q9, Q91WQ3, Q62318, Q64737, P51855, Q9ER72, P61082, Q3THK7, P70698, Q9D2R0, Q9D0R2, Q02053, Q68FL6, Q9WUA2, Q8BP47, P22682, Q8BGQ7, Q9D0I9                                                                                                                                                                                                                                                                                                                                                 | 1.81150998605224E-12 |
| GOTERM_MF_DIRECT            | GO:0016874~ligase activity                                    | 42    | 4.70324748040314 | 3.33506726117029E-09 | P32921, Q61510, P97386, Q9R1T2, B2RQC6, Q8C0C7, Q922B2, P37913, A2AN08, Q61035, Q5SUR0, Q922D8, Q99PP7, Q8CGC7, Q9CZD3, Q99KP6, Q8BMJ2, Q9Z1F9, Q9QUJ7, P26638, P46664, Q8BU30, Q9D7H3, P97494, Q9Z1Q9, Q91WQ3, Q62318, Q64737, P51855, Q9ER72, P61082, Q3THK7, P70698, Q9D2R0, Q9D0R2, Q02053, Q68FL6, Q9WUA2, Q8BP47, P22682, Q8BGQ7, Q9D0I9                                                                                                                                                                                                                                                                                                                                                         | 3.81448317996352E-07 |

|                             |                                                                  |       |                   |                      |                                                                                                                                                                                                                                                                                                                                                                                                        |                      |
|-----------------------------|------------------------------------------------------------------|-------|-------------------|----------------------|--------------------------------------------------------------------------------------------------------------------------------------------------------------------------------------------------------------------------------------------------------------------------------------------------------------------------------------------------------------------------------------------------------|----------------------|
| KEGG_PATHWAY                | mmu00970:Aminoacyl-tRNA biosynthesis                             | 19    | 2.12765957446808  | 8.76919154725896E-09 | P32921, Q9Z1Q9, Q91WQ3, Q8C0C7, Q922B2, Q9ER72, Q61035, Q9D0R2, Q68FL6, Q8CGC7, Q9WUA2, Q8BML9, Q8BP47, Q9CZD3, Q8BMJ2, P26638, Q8BU30, Q8BGQ7, Q9D0I9                                                                                                                                                                                                                                                 | 9.64611070198486E-07 |
| UP_SEQ_FEATURE              | short sequence motif:"HIGH" region                               | 9     | 1.00783874580067  | 1.41003448315905E-07 | P32921, Q68FL6, Q9Z1Q9, Q8CGC7, Q91WQ3, Q8BMJ2, Q8BU30, Q9ER72, Q9D0I9                                                                                                                                                                                                                                                                                                                                 | 0.000137138020892    |
| INTERPRO                    | IPR014729:Rossmann-like alpha/beta/alpha sandwich fold           | 12    | 1.3437849944009   | 3.36769827544882E-07 | P32921, Q68FL6, Q9Z1Q9, Q8CGC7, Q8BML9, Q91WQ3, Q8BMJ2, Q9DBL7, Q8BU30, Q3THK7, Q9ER72, Q9D0I9                                                                                                                                                                                                                                                                                                         | 3.24173042085191E-05 |
| INTERPRO                    | IPR001412:Aminoacyl-tRNA synthetase, class I, conserved site     | 8     | 0.895856662933931 | 3.9721679765374E-07  | P32921, Q68FL6, Q9Z1Q9, Q8CGC7, Q8BML9, Q8BMJ2, Q8BU30, Q9D0I9                                                                                                                                                                                                                                                                                                                                         | 3.24173042085191E-05 |
| UP_SEQ_FEATURE              | short sequence motif:"KMSKS" region                              | 8     | 0.895856662933931 | 9.51551211847182E-07 | P32921, Q68FL6, Q9Z1Q9, Q8CGC7, Q91WQ3, Q8BMJ2, Q8BU30, Q9ER72                                                                                                                                                                                                                                                                                                                                         | 0.000374720867225    |
| INTERPRO                    | IPR006195:Aminoacyl-tRNA synthetase, class II                    | 8     | 0.895856662933931 | 1.12654918173837E-06 | Q8CGC7, Q8BP47, Q8C0C7, Q9CZD3, P26638, Q922B2, Q61035, Q9D0R2                                                                                                                                                                                                                                                                                                                                         | 8.27450373986836E-05 |
| INTERPRO                    | IPR009080:Aminoacyl-tRNA synthetase, class 1a, anticodon-binding | 6     | 0.671892497200448 | 6.21542626048933E-05 | Q68FL6, Q9Z1Q9, Q8BMJ2, Q8BU30, Q9ER72, Q9D0I9                                                                                                                                                                                                                                                                                                                                                         | 0.003804358823608    |
| <b>Annotation Cluster 4</b> | Enrichment Score: 7.16237599917099                               |       |                   |                      |                                                                                                                                                                                                                                                                                                                                                                                                        |                      |
| Category                    | Term                                                             | Count | %                 | PValue               | Genes                                                                                                                                                                                                                                                                                                                                                                                                  | FDR                  |
| UP_KEYWORDS                 | Actin-binding                                                    | 29    | 3.2474804031355   | 2.61002940668022E-08 | O89053, Q7TPR4, Q61879, Q9Z0P5, Q62261, Q8BTM8, P70248, Q9JHJ0, P21107, Q8VDD5, Q9CVB6, Q9JM76, P47754, Q8K298, Q8BQ30, Q8BH43, P97376, Q8VD75, O70200, Q62418, O08638, Q9WUM4, Q9D2V7, Q9QXS1, P13020, P57780, Q6URW6, Q9CQI6, O88342                                                                                                                                                                 | 3.68014146341911E-07 |
| GOTERM_MF_DIRECT            | GO:0051015~actin filament binding                                | 22    | 2.46360582306831  | 8.50716731441449E-08 | O89053, Q9JMH9, Q7TPR4, P97376, Q8VD75, Q61879, O70200, Q62418, Q8BTM8, O08539, Q9WUM4, Q71LX4, Q3UQ44, Q8VDD5, Q9CVB6, Q9JM76, P58252, P57780, Q6URW6, O88342, Q8C052, P26039                                                                                                                                                                                                                         | 5.70146351784828E-06 |
| GOTERM_MF_DIRECT            | GO:0003779~actin binding                                         | 37    | 4.14333706606943  | 1.46703889292032E-07 | O89053, Q7TPR4, Q61879, Q9Z0P5, Q62261, Q8BTM8, Q71LX4, P70248, Q9JHJ0, P21107, Q8VDD5, Q9CVB6, P68510, Q9JM76, P47754, P61982, Q8K298, P26039, Q8BQ30, Q8BH43, Q9Z0G0, P97376, Q8C151, Q8VD75, O70200, Q62418, O08638, Q9WUM4, Q9D2V7, Q9QXS1, P97814, P70315, P13020, P57780, Q6URW6, Q9CQI6, O88342                                                                                                 | 8.94893724681394E-06 |
| <b>Annotation Cluster 5</b> | Enrichment Score: 7.008903138754214                              |       |                   |                      |                                                                                                                                                                                                                                                                                                                                                                                                        |                      |
| Category                    | Term                                                             | Count | %                 | PValue               | Genes                                                                                                                                                                                                                                                                                                                                                                                                  | FDR                  |
| GOTERM_CC_DIRECT            | GO:0030529~intracellular ribonucleoprotein complex               | 49    | 5.48712206047032  | 1.21322104090703E-16 | P62918, Q9EQK5, P35979, Q9D7S7, P62082, Q6P5F9, P12970, P14115, Q61990, Q80ZK0, O09167, P62317, P25444, P62830, P29341, Q9WTM5, Q60591, Q9D7A6, P62320, P14131, P57780, P62889, P49962, P62843, Q9CXY6, Q91VR5, Q61656, P99027, Q80WS3, Q9JKF1, Q8BMA6, Q62189, P67984, Q8CGC7, Q6NVF9, Q924T2, P62852, P62908, Q9CQJ2, P97379, Q9D338, Q99020, Q3UEB3, Q9CQV5, P60122, P58252, Q9D8E6, P62702, Q9CQI7 | 7.84044097686166E-15 |
| UP_KEYWORDS                 | Ribonucleoprotein                                                | 36    | 4.03135498320269  | 2.57268649762329E-10 | P62918, P35979, Q9EQK5, P99027, Q9D7S7, Q9CQK8, P62082, Q80WS3, Q8BMA6, P14115, Q61990, P12970, Q62189, Q80ZK0, P67984, P63323, O09167, P62317, Q924T2, P25444, P62852, P62830, P62908, Q9D338, Q9D7A6, Q99020, Q3UEB3, Q9CQV5, P62320, P14131, Q9D8E6, P62702, P62889, P49962, P62843, Q9CQI7                                                                                                         | 4.53435995206105E-09 |
| GOTERM_CC_DIRECT            | GO:0005840~ribosome                                              | 25    | 2.79955207166853  | 1.47531169955735E-07 | P62918, P35979, P99027, Q9D7S7, P62082, P14115, P12970, Q80ZK0, P67984, O09167, Q924T2, P25444, P62852, P62830, P62908, Q9D338, P35564, Q99M31, Q9CQV5, P14131, Q9D8E6, P62702, P62889, Q6P542, P62843                                                                                                                                                                                                 | 3.81368074335574E-06 |
| UP_KEYWORDS                 | Ribosomal protein                                                | 23    | 2.57558790593505  | 1.22690622346629E-06 | P62918, P62908, P35979, P99027, Q9D7S7, Q9D338, P62082, P12970, P14115, Q9CQV5, Q80ZK0, P14131, P67984, P63323, Q9D8E6, O09167, P62702, P62889, Q924T2, P25444, P62852, P62830, P62843                                                                                                                                                                                                                 | 1.3307213654519E-05  |

|                                                                 |                                                                             |       |                   |                      |                                                                                                                                                                                                                                        |                      |
|-----------------------------------------------------------------|-----------------------------------------------------------------------------|-------|-------------------|----------------------|----------------------------------------------------------------------------------------------------------------------------------------------------------------------------------------------------------------------------------------|----------------------|
| KEGG_PATHWAY                                                    | mmu03010:Ribosome                                                           | 22    | 2.46360582306831  | 3.95788466244988E-05 | P62918, P62908, P35979, P99027, Q9D7S7, Q9D338, P62082, P12970, P14115, Q80ZK0, P14131, P67984, P63323, Q9D8E6, O09167, P62702, P62889, Q924T2, P25444, P62852, P62830, P62843                                                         | 0.001741469251478    |
| GOTERM_CC_DIRECT                                                | GO:0022625~cytosolic large ribosomal subunit                                | 13    | 1.45576707726764  | 0.000139807490362    | P62918, P35979, P99027, Q9D7S7, P12970, P14115, P67984, P63323, Q9D8E6, O09167, P62889, P62830, Q8BVY0                                                                                                                                 | 0.002190317349007    |
| GOTERM_MF_DIRECT                                                | GO:0003735~structural constituent of ribosome                               | 22    | 2.46360582306831  | 0.002771165718843    | P62918, P62908, P35979, P99027, Q9D7S7, Q9D338, P62082, P14115, Q9CQV5, Q80ZK0, P14131, P67984, P63323, Q9D8E6, O09167, P62702, P62889, Q924T2, P25444, P62852, P62830, P62843                                                         | 0.06037182458908     |
| <b>Annotation Cluster 6</b> Enrichment Score: 6.874711952375081 |                                                                             |       |                   |                      |                                                                                                                                                                                                                                        |                      |
| Category                                                        | Term                                                                        | Count | %                 | PValue               | Genes                                                                                                                                                                                                                                  | FDR                  |
| GOTERM_CC_DIRECT                                                | GO:0000502~proteasome complex                                               | 29    | 3.2474804031355   | 5.15257484483323E-23 | Q9D8W5, P54775, P46471, O35593, Q9WUP7, Q9R1P4, Q9CR00, P61290, Q9CZH3, O35226, P62196, Q9Z2U1, P26516, P62334, O09061, P97371, P97372, Q3TXS7, Q9JMA1, P70195, Q9EST4, P62192, P54726, Q99J14, Q922Y1, Q9QUM9, O88685, Q8R317, Q9Z2X2 | 3.80554456396968E-21 |
| UP_KEYWORDS                                                     | Proteasome                                                                  | 25    | 2.79955207166853  | 3.54509365545851E-21 | Q9D8W5, P54775, P46471, O35593, Q9WUP7, Q9R1P4, Q9CR00, P61290, O35226, P62196, Q9Z2U1, P26516, P62334, O09061, P97371, P97372, Q3TXS7, Q9JMA1, P70195, P62192, P54726, Q99J14, Q9QUM9, O88685, Q8R317                                 | 1.11079601204367E-19 |
| KEGG_PATHWAY                                                    | mmu03050:Proteasome                                                         | 20    | 2.23964165733483  | 5.08170507165565E-13 | P97372, Q9D8W5, P54775, Q3TXS7, P70195, P46471, O35593, Q9R1P4, P62192, P61290, Q99J14, O35226, P62196, Q9Z2U1, Q9QUM9, O88685, P26516, P62334, O09061, P97371                                                                         | 1.11797511576424E-10 |
| GOTERM_CC_DIRECT                                                | GO:0008540~proteasome regulatory particle, base subcomplex                  | 11    | 1.23180291153415  | 1.26193618905255E-12 | P54775, O35226, Q3TXS7, P46471, P62196, P62192, O88685, Q8BJY1, P62334, Q9CR00, Q9Z2X2                                                                                                                                                 | 6.52421009740169E-11 |
| GOTERM_CC_DIRECT                                                | GO:0022624~proteasome accessory complex                                     | 12    | 1.3437849944009   | 1.81161688214238E-12 | Q9D8W5, P54775, Q99J14, O35226, Q3TXS7, P46471, P62196, O35593, P62192, O88685, Q8BJY1, P62334                                                                                                                                         | 8.51459934606918E-11 |
| GOTERM_CC_DIRECT                                                | GO:0031597~cytosolic proteasome complex                                     | 8     | 0.895856662933931 | 1.05856209854079E-08 | P54775, P46471, P62196, O35593, Q9WUP7, P62192, O88685, P62334                                                                                                                                                                         | 3.42047878090994E-07 |
| GOTERM_CC_DIRECT                                                | GO:0031595~nuclear proteasome complex                                       | 7     | 0.783874580067189 | 6.90977952254155E-08 | Q9D8W5, P54775, P46471, P62196, P62192, O88685, P62334                                                                                                                                                                                 | 1.98464222952999E-06 |
| INTERPRO                                                        | IPR005937:26S proteasome subunit P45                                        | 6     | 0.671892497200448 | 3.58339590976844E-07 | P54775, P46471, P62196, P62192, O88685, P62334                                                                                                                                                                                         | 3.24173042085191E-05 |
| GOTERM_MF_DIRECT                                                | GO:0036402~proteasome-activating ATPase activity                            | 6     | 0.671892497200448 | 6.43050340315827E-07 | P54775, P46471, P62196, P62192, O88685, P62334                                                                                                                                                                                         | 3.26883922993879E-05 |
| GOTERM_BP_DIRECT                                                | GO:0045899~positive regulation of RNA polymerase II transcriptional preinit | 6     | 0.671892497200448 | 5.94830119781498E-05 | P54775, P46471, P62196, P62192, O88685, P62334                                                                                                                                                                                         | 0.007234431634192    |
| INTERPRO                                                        | IPR003959:ATPase, AAA-type, core                                            | 9     | 1.00783874580067  | 0.000298409142106    | P54775, P46471, P62196, P62192, O88685, P46467, Q9WUK4, P62334, P35601                                                                                                                                                                 | 0.015655822491194    |
| INTERPRO                                                        | IPR003960:ATPase, AAA-type, conserved site                                  | 7     | 0.783874580067189 | 0.000341453589796    | P54775, P46471, P62196, P62192, O88685, P46467, P62334                                                                                                                                                                                 | 0.017296390462439    |
| GOTERM_BP_DIRECT                                                | GO:0030163~protein catabolic process                                        | 9     | 1.00783874580067  | 0.000456295850684    | P54775, Q9D4H8, P46471, P62196, Q9D906, P62192, O88685, P62334, P31750                                                                                                                                                                 | 0.034056263037421    |
| INTERPRO                                                        | IPR003593:AAA+ ATPase domain                                                | 15    | 1.67973124300112  | 0.00075693763269     | P54775, P46471, Q9WTM5, P62192, Q9WUK4, P35601, P61222, P60122, P62196, O88685, Q99LE6, P46467, Q9JHU4, P62334, Q6P542                                                                                                                 | 0.030052469795193    |
| SMART                                                           | SM00382:AAA                                                                 | 15    | 1.67973124300112  | 0.000890808836471    | P54775, P46471, Q9WTM5, P62192, Q9WUK4, P35601, P61222, P60122, P62196, O88685, Q99LE6, P46467, Q9JHU4, P62334, Q6P542                                                                                                                 | 0.024843668661584    |
| KEGG_PATHWAY                                                    | mmu05169:Epstein-Barr virus infection                                       | 18    | 2.01567749160134  | 0.001209630829409    | Q9D8W5, P54775, Q3TXS7, P46471, O35593, P62192, P31750, Q04207, Q99J14, O35226, P47809, Q03963, P62196, P25799, O88685, P26516, P62334, P42227                                                                                         | 0.017741252164662    |
| GOTERM_MF_DIRECT                                                | GO:0017025~TBP-class protein binding                                        | 6     | 0.671892497200448 | 0.001308829305995    | P54775, P46471, P62196, P62192, O88685, P62334                                                                                                                                                                                         | 0.032366994999614    |
| <b>Annotation Cluster 7</b> Enrichment Score: 6.562235809367333 |                                                                             |       |                   |                      |                                                                                                                                                                                                                                        |                      |
| Category                                                        | Term                                                                        | Count | %                 | PValue               | Genes                                                                                                                                                                                                                                  | FDR                  |

|                  |                                                                                |    |                   |                      |                                                                                                                                                                                                                                                                                                |                      |
|------------------|--------------------------------------------------------------------------------|----|-------------------|----------------------|------------------------------------------------------------------------------------------------------------------------------------------------------------------------------------------------------------------------------------------------------------------------------------------------|----------------------|
| UP_KEYWORDS      | Chaperone                                                                      | 36 | 4.03135498320269  | 1.28671271825218E-16 | Q99L47, P11983, Q9CR00, Q9CZH3, P61222, Q61081, P62075, Q64152, Q9QYJ0, Q9QYJ3, P0C7N9, P80315, P80314, Q8BK64, Q9CQN1, P80313, P54103, P61759, Q9CR16, Q9WU28, Q9EST4, P35564, Q8BJY1, Q99M31, Q64378, O08997, P42932, O08583, Q9CYG7, Q9CQI6, Q9CWM4, Q9QYI3, P80318, P80317, Q9Z2X2, P80316 | 3.02377488789263E-15 |
| GOTERM_BP_DIRECT | GO:1904874~positive regulation of telomerase RNA localization to Cajal body    | 10 | 1.11982082866741  | 8.9804718117527E-10  | P80315, P80314, P80313, P42932, P60122, P11983, Q9WTM5, P80318, P80317, P80316                                                                                                                                                                                                                 | 4.42378041446938E-07 |
| GOTERM_BP_DIRECT | GO:1904871~positive regulation of protein localization to Cajal body           | 8  | 0.895856662933931 | 1.12413926123429E-09 | P80315, P80314, P80313, P42932, P11983, P80318, P80317, P80316                                                                                                                                                                                                                                 | 4.61459166736675E-07 |
| GOTERM_CC_DIRECT | GO:0005832~chaperonin-containing T-complex                                     | 8  | 0.895856662933931 | 3.28164587534659E-09 | P80315, P80314, P80313, P42932, P11983, P80318, P80317, P80316                                                                                                                                                                                                                                 | 1.13107394503612E-07 |
| GOTERM_BP_DIRECT | GO:0006457~protein folding                                                     | 23 | 2.57558790593505  | 5.56277961063175E-09 | P80315, P80314, Q8BK64, Q9CQN1, P80313, P61759, Q9CR16, Q9WU28, Q99L47, P11983, P35564, Q64378, Q8R180, P42932, Q61081, Q9QYJ0, Q9QYJ3, Q9CWM4, P80318, Q8BGQ7, P80317, P80316, Q8R1N4                                                                                                         | 1.95730374014086E-06 |
| GOTERM_MF_DIRECT | GO:0051082~unfolded protein binding                                            | 18 | 2.01567749160134  | 6.33263421101452E-09 | P80315, P80314, Q9CQN1, P80313, Q9WU28, Q99L47, P11983, P35564, Q8BQM4, P42932, Q61081, Q9QYJ0, Q9QYJ3, Q9CWM4, P80318, P80317, P80316, Q8R1N4                                                                                                                                                 | 6.43817811453142E-07 |
| INTERPRO         | IPR027410:TCP-1-like chaperonin intermediate domain                            | 8  | 0.895856662933931 | 8.68541583576768E-09 | P80315, P80314, P80313, P42932, P11983, P80318, P80317, P80316                                                                                                                                                                                                                                 | 3.18971896568568E-06 |
| INTERPRO         | IPR002194:Chaperonin TCP-1, conserved site                                     | 8  | 0.895856662933931 | 8.68541583576768E-09 | P80315, P80314, P80313, P42932, P11983, P80318, P80317, P80316                                                                                                                                                                                                                                 | 3.18971896568568E-06 |
| INTERPRO         | IPR017998:Chaperone tailless complex polypeptide 1 (TCP-1)                     | 8  | 0.895856662933931 | 2.31357521551534E-08 | P80315, P80314, P80313, P42932, P11983, P80318, P80317, P80316                                                                                                                                                                                                                                 | 4.24830248949004E-06 |
| GOTERM_CC_DIRECT | GO:0002199~zona pellucida receptor complex                                     | 8  | 0.895856662933931 | 1.37193317232973E-07 | P80315, P80314, P80313, P42932, P11983, P80318, P80317, P80316                                                                                                                                                                                                                                 | 3.73310236891826E-06 |
| INTERPRO         | IPR027409:GroEL-like apical domain                                             | 8  | 0.895856662933931 | 2.18694916472059E-07 | P80315, P80314, P80313, P42932, P11983, P80318, P80317, P80316                                                                                                                                                                                                                                 | 2.47125255613427E-05 |
| INTERPRO         | IPR027413:GroEL-like equatorial domain                                         | 8  | 0.895856662933931 | 2.18694916472059E-07 | P80315, P80314, P80313, P42932, P11983, P80318, P80317, P80316                                                                                                                                                                                                                                 | 2.47125255613427E-05 |
| GOTERM_BP_DIRECT | GO:1904851~positive regulation of establishment of protein localization to tel | 7  | 0.783874580067189 | 2.81670370336046E-07 | P80315, P80314, P80313, P42932, P11983, P80317, P80316                                                                                                                                                                                                                                         | 7.70837913486311E-05 |
| INTERPRO         | IPR002423:Chaperonin Cpn60/TCP-1                                               | 8  | 0.895856662933931 | 3.9721679765374E-07  | P80315, P80314, P80313, P42932, P11983, P80318, P80317, P80316                                                                                                                                                                                                                                 | 3.24173042085191E-05 |
| GOTERM_BP_DIRECT | GO:1901998~toxin transport                                                     | 11 | 1.23180291153415  | 6.48242126646055E-07 | P80315, P80314, P80313, P42932, P61924, P29452, Q8R0H9, P11983, P80318, P80317, P80316                                                                                                                                                                                                         | 0.000145147305266    |
| GOTERM_BP_DIRECT | GO:0032212~positive regulation of telomere maintenance via telomerase          | 10 | 1.11982082866741  | 2.74917944464889E-06 | P80315, P80314, P80313, P42932, Q9JLV6, P63085, P11983, P80318, P80317, P80316                                                                                                                                                                                                                 | 0.00052086376709     |
| GOTERM_BP_DIRECT | GO:0007339~binding of sperm to zona pellucida                                  | 9  | 1.00783874580067  | 6.43944412919921E-05 | P80315, P80314, P80313, P42932, P11983, P80318, P80317, Q80X50, P80316                                                                                                                                                                                                                         | 0.007234431634192    |
| GOTERM_BP_DIRECT | GO:0050821~protein stabilization                                               | 16 | 1.79171332586786  | 0.000160561181118    | P80315, P80314, P80313, P11438, Q8VD75, Q8BTM8, P11983, Q9QUR7, Q91YE6, P17047, P42932, Q61081, Q80UM3, P80318, P80317, P80316                                                                                                                                                                 | 0.0146467477442      |
| GOTERM_CC_DIRECT | GO:0044297~cell body                                                           | 13 | 1.45576707726764  | 0.000412563429801    | P80315, P80314, Q9CXW3, P80313, P03995, P11983, P42932, P51807, O09131, Q91V12, P80318, P80317, P80316                                                                                                                                                                                         | 0.005469110082235    |

**Annotation Cluster 8** Enrichment Score: 5.773752457285372

| Category         | Term                                                          | Count | %                | PValue               | Genes                                                                                                                                                  | FDR                  |
|------------------|---------------------------------------------------------------|-------|------------------|----------------------|--------------------------------------------------------------------------------------------------------------------------------------------------------|----------------------|
| GOTERM_BP_DIRECT | GO:0006413~translational initiation                           | 19    | 2.12765957446808 | 1.12627335718676E-12 | Q62448, Q99JX4, Q6ZQ58, Q9Z0N1, Q99LC8, Q9DCH4, O70194, Q9Z1D1, Q6NZJ6, Q8R1B4, Q62167, P61222, Q62095, Q8BMJ3, Q61749, Q05D44, P23116, P60229, Q6P542 | 6.93502819687747E-10 |
| UP_KEYWORDS      | Initiation factor                                             | 15    | 1.67973124300112 | 1.83219510915517E-08 | Q62448, Q99JX4, Q9Z0N1, Q99LC8, Q9DCH4, O70194, Q9Z1D1, Q6NZJ6, Q8R1B4, Q03963, Q8BMJ3, Q61749, Q05D44, P23116, P60229                                 | 2.71936326727241E-07 |
| GOTERM_CC_DIRECT | GO:0005852~eukaryotic translation initiation factor 3 complex | 9     | 1.00783874580067 | 3.54557556111695E-08 | Q99JX4, P61222, Q9DCH4, O70194, P23116, Q9Z1D1, Q8R1B4, P60229, Q62167                                                                                 | 1.07827209711616E-06 |
| GOTERM_BP_DIRECT | GO:0006446~regulation of translational initiation             | 11    | 1.23180291153415 | 3.51118540957044E-07 | Q62448, Q99JX4, Q99LC8, Q9DCH4, Q05D44, O70194, P23116, Q9Z1D1, Q6NZJ6, Q8R1B4, P60229                                                                 | 8.648049663772E-05   |

|                  |                                                                      |    |                   |                      |                                                                                                                                                                                        |                      |
|------------------|----------------------------------------------------------------------|----|-------------------|----------------------|----------------------------------------------------------------------------------------------------------------------------------------------------------------------------------------|----------------------|
| UP_SEQ_FEATURE   | domain:PCI                                                           | 9  | 1.00783874580067  | 4.07279173049243E-07 | Q9D8W5, Q8VBV7, Q8BV13, Q99JI4, Q99JX4, Q9CZ04, P23116, Q8R1B4, P60229                                                                                                                 | 0.000200483172933    |
| SMART            | SM00088:PINT                                                         | 8  | 0.895856662933931 | 4.49805112513618E-07 | Q9D8W5, Q8BV13, Q99JI4, Q99JX4, Q9CZ04, P23116, Q8R1B4, P60229                                                                                                                         | 3.76336944136393E-05 |
| GOTERM_MF_DIRECT | GO:0003743~translation initiation factor activity                    | 15 | 1.67973124300112  | 4.90661852804581E-07 | Q62448, Q99JX4, Q9Z0N1, Q99LC8, Q9DCH4, O70194, Q9Z1D1, Q6NZJ6, Q8R1B4, Q03963, Q8BMJ3, Q61749, Q05D44, P23116, P60229                                                                 | 2.8059724707262E-05  |
| INTERPRO         | IPR000717:Proteasome component (PCI) domain                          | 8  | 0.895856662933931 | 6.84068614579653E-07 | Q9D8W5, Q8BV13, Q99JI4, Q99JX4, Q9CZ04, P23116, Q8R1B4, P60229                                                                                                                         | 5.28893049903953E-05 |
| GOTERM_BP_DIRECT | GO:0001731~formation of translation preinitiation complex            | 9  | 1.00783874580067  | 3.38240967748298E-06 | Q99JX4, Q9Z0N1, Q9DCH4, O70194, P23116, Q9Z1D1, Q8R1B4, P25444, P60229                                                                                                                 | 0.000595062502546    |
| GOTERM_CC_DIRECT | GO:0033290~eukaryotic 48S preinitiation complex                      | 7  | 0.783874580067189 | 9.86494551033019E-06 | Q99JX4, Q9DCH4, O70194, P23116, Q9Z1D1, Q8R1B4, P60229                                                                                                                                 | 0.000196160647263    |
| GOTERM_CC_DIRECT | GO:0016282~eukaryotic 43S preinitiation complex                      | 7  | 0.783874580067189 | 9.86494551033019E-06 | Q99JX4, Q9DCH4, O70194, P23116, Q9Z1D1, Q8R1B4, P60229                                                                                                                                 | 0.000196160647263    |
| GOTERM_CC_DIRECT | GO:0071541~eukaryotic translation initiation factor 3 complex, eIF3m | 5  | 0.559910414333707 | 0.000118947780283    | Q99JX4, Q9DCH4, O70194, P23116, Q8R1B4                                                                                                                                                 | 0.001983742013103    |
| KEGG_PATHWAY     | mmu03013:RNA transport                                               | 23 | 2.57558790593505  | 0.000146149345697    | Q62448, Q9Z0N1, Q99LC8, P29341, Q9DCH4, O70194, Q9Z1D1, Q8K1J6, Q6NZJ6, Q924C1, P70168, Q6P5F9, Q8R1B4, Q61584, Q9EPU0, Q8CIG8, O08583, Q8BMJ3, Q61749, Q05D44, P23116, Q9CWU9, P60229 | 0.003451321689556    |

**Annotation Cluster 9** Enrichment Score: 4.9469867867081865

| Category         | Term                         | Count | %                | PValue               | Genes                                                                                                                                                                                                                                                                                                                                                                                                                                                                                                                                                                                                                                                                                                                          | FDR                  |
|------------------|------------------------------|-------|------------------|----------------------|--------------------------------------------------------------------------------------------------------------------------------------------------------------------------------------------------------------------------------------------------------------------------------------------------------------------------------------------------------------------------------------------------------------------------------------------------------------------------------------------------------------------------------------------------------------------------------------------------------------------------------------------------------------------------------------------------------------------------------|----------------------|
| UP_KEYWORDS      | Protein transport            | 50    | 5.59910414333707 | 2.17527578609148E-09 | P98078, Q6P5F9, O08547, P17427, P17426, Q8BKC5, Q6P8X1, Q91YE6, O35643, Q8CIE6, Q01405, P62075, Q64152, P63242, P61027, P46467, Q9CT10, Q9CR16, Q8BFY9, Q9CR95, P61750, P57780, Q9QXK3, Q9D906, P52293, Q5XJY5, Q91ZR2, Q9ERK4, Q61655, Q9WU78, P61924, Q99MD9, P70168, Q9D662, Q8C0E2, P84091, O35344, O35343, Q8BPX9, Q8R0H9, Q924C1, Q9D2V7, Q3UM18, Q9QZ88, Q6PGL7, P84078, O88746, P60521, Q9CWU9, Q3UMB9                                                                                                                                                                                                                                                                                                                 | 3.40793206487665E-08 |
| GOTERM_BP_DIRECT | GO:0015031~protein transport | 52    | 5.82306830907055 | 1.48775137696149E-07 | P98078, Q6P5F9, O08547, P17427, P17426, Q8BKC5, Q6P8X1, Q91YE6, O35643, Q8CIE6, Q01405, P62075, Q64152, P63242, P61027, O88531, P46467, Q9CT10, Q9CR16, Q8BFY9, Q9CR95, P61750, P57780, Q9QXK3, Q9D906, Q5XJY5, P50396, Q91ZR2, Q9ERK4, Q61655, Q9WU78, P61924, Q99MD9, P70168, Q9D662, Q8C0E2, P84091, Q8VDD5, O35344, O35343, Q8BPX9, Q8R0H9, Q924C1, Q9D2V7, Q3UM18, Q9QZ88, Q6PGL7, P84078, O88746, P60521, Q9CWU9, Q3UMB9                                                                                                                                                                                                                                                                                                 | 4.5804145518202E-05  |
| UP_KEYWORDS      | Transport                    | 88    | 9.85442329227324 | 0.001417733693606    | P98078, P53564, Q8BVE3, Q3UBX0, Q6P5F9, O08547, P17427, P17426, Q8BKC5, Q62048, Q6P8X1, Q91YE6, P63168, O35643, Q8CIE6, Q01405, P62075, Q64152, P63242, P61027, Q9CQH3, P46467, Q8R1Q8, Q9CT10, Q9CPN8, Q9CR16, Q8BFY9, Q62418, Q9CR95, Q6PDM2, Q03265, Q8VDJ3, Q9CQX2, P53811, O08997, Q8R180, Q9Z1G3, Q9CQ75, Q9DBG5, P61750, P57780, Q9QXK3, P62482, Q9D906, P52293, Q9JHU4, Q5XJY5, Q91ZR2, Q9ERK4, Q61655, Q9WU78, B2RXC1, P61924, Q99MD9, Q8R2E9, P50516, P70168, P31750, Q9D662, Q8C0E2, P84091, O35344, P50518, O54984, P51807, O35343, Q8BPX9, P56383, Q9QYB1, Q91YT0, Q8VBT6, Q8R0H9, P97379, P97855, Q924C1, Q9D2V7, Q3UM18, Q9QZ88, Q6PGL7, Q91VD9, Q05816, O08583, P84078, O88746, Q3U0V1, P60521, Q9CWU9, Q3UMB9 | 0.007543413237679    |

**Annotation Cluster 10** Enrichment Score: 4.863316553080941

| Category | Term | Count | % | PValue | Genes | FDR |
|----------|------|-------|---|--------|-------|-----|
|----------|------|-------|---|--------|-------|-----|



|                  |                                     |    |                  |                      |                                                                                                                                                                                                                                                                                                                                                                                                                                                                                                                                                                                                                                                          |                      |
|------------------|-------------------------------------|----|------------------|----------------------|----------------------------------------------------------------------------------------------------------------------------------------------------------------------------------------------------------------------------------------------------------------------------------------------------------------------------------------------------------------------------------------------------------------------------------------------------------------------------------------------------------------------------------------------------------------------------------------------------------------------------------------------------------|----------------------|
| UP_KEYWORDS      | Cell division                       | 33 | 3.69540873460246 | 1.03752616323386E-06 | Q91ZR2, Q8CG48, Q6P9P6, Q8K1R7, Q9WU78, P97386, P28740, Q8BFT2, Q8R3C0, Q80X41, Q68FD5, P37913, P11440, P49718, A2AGT5, P51807, Q8K2Z4, Q1HFZ0, P46467, Q8K298, P25322, Q8R1Q8, Q80UG5, P62908, Q8CI75, Q9D2X5, Q99P69, P60122, Q9JLQ0, Q64261, Q9CWU9, Q9WVA3, Q8BK67<br>Q64701, Q91ZR2, Q8CG48, Q6P9P6, Q8K1R7, Q9WU78, P97386, P28740, Q8BFT2, Q8R3C0, Q8VBW6, Q99MD9, Q80X41, Q68FD5, Q61074, P37913, P11440, P61290, Q80U87, Q9QUR7, P49718, A2AGT5, P63085, P51807, Q8K2Z4, Q1HFZ0, Q60749, P46467, Q8K298, P25322, Q8R1Q8, Q8CFI2, Q80UG5, P62908, Q9ESL4, P97311, Q8CI75, Q9D2X5, P18654, Q99P69, P60122, Q9JLQ0, Q64261, Q9CWU9, Q9WVA3, Q8BK67 | 1.21909324179979E-05 |
| UP_KEYWORDS      | Cell cycle                          | 46 | 5.1511758118701  | 1.18511975800538E-06 | Q91ZR2, Q8CG48, Q6P9P6, Q8K1R7, P28740, Q8BFT2, Q8R3C0, Q80X41, Q68FD5, P11440, A2AGT5, P51807, Q8K2Z4, Q1HFZ0, Q8K298, Q8R1Q8, P62908, Q8CI75, Q9D2X5, Q99P69, P60122, Q9JLQ0, Q9CWU9, Q9WVA3, Q8BK67                                                                                                                                                                                                                                                                                                                                                                                                                                                   | 1.3307213654519E-05  |
| UP_KEYWORDS      | Mitosis                             | 25 | 2.79955207166853 | 6.55225765650144E-06 | Q91ZR2, Q8CG48, Q6P9P6, Q8K1R7, P28740, Q8BFT2, Q8R3C0, Q80X41, Q68FD5, P11440, A2AGT5, P51807, Q8K2Z4, Q1HFZ0, Q8K298, Q8R1Q8, P62908, Q8CI75, Q9D2X5, Q99P69, P60122, Q9JLQ0, Q9CWU9, Q9WVA3, Q8BK67                                                                                                                                                                                                                                                                                                                                                                                                                                                   | 6.15912219711135E-05 |
| GOTERM_BP_DIRECT | GO:0051301~cell division            | 33 | 3.69540873460246 | 3.67266014935758E-05 | Q91ZR2, Q8CG48, Q6P9P6, Q8K1R7, Q9WU78, P97386, P28740, Q8BFT2, Q8R3C0, Q80X41, P37913, P11440, P49718, A2AGT5, P51807, Q8K2Z4, Q1HFZ0, P46467, P27546, Q8K298, P25322, Q8R1Q8, Q80UG5, P62908, Q8CI75, Q9D2X5, Q99P69, P60122, Q9JLQ0, Q64261, Q9CWU9, Q9WVA3, Q8BK67                                                                                                                                                                                                                                                                                                                                                                                   | 0.004760927340983    |
| GOTERM_BP_DIRECT | GO:0007067~mitotic nuclear division | 26 | 2.91153415453527 | 0.00010865419601     | Q91ZR2, Q8CG48, Q6P9P6, Q8K1R7, P28740, Q8BFT2, Q8R3C0, Q80X41, Q68FD5, P11440, Q9DBR7, A2AGT5, P51807, Q8K2Z4, Q1HFZ0, Q8K298, Q8R1Q8, P62908, Q8CI75, Q9D2X5, Q99P69, P60122, Q9JLQ0, Q9CWU9, Q9WVA3, Q8BK67                                                                                                                                                                                                                                                                                                                                                                                                                                           | 0.010292895568159    |
| GOTERM_BP_DIRECT | GO:0007049~cell cycle               | 44 | 4.92721164613662 | 0.000205551747639    | Q64701, Q91ZR2, Q8CG48, Q6P9P6, Q8K1R7, Q9WU78, P97386, P28740, Q8BFT2, Q8R3C0, Q8VBW6, Q99MD9, Q80X41, Q61074, P37913, P11440, P61290, Q80U87, Q9QUR7, P49718, A2AGT5, P63085, Q8K2Z4, Q1HFZ0, Q60749, P46467, Q8K298, P25322, Q8R1Q8, Q8CFI2, Q80UG5, P62908, Q9ESL4, P97311, Q8CI75, Q9D2X5, P18654, Q99P69, P60122, Q9JLQ0, Q64261, Q9CWU9, Q9WVA3, Q8BK67                                                                                                                                                                                                                                                                                           | 0.017881220420622    |

**Annotation Cluster 11** Enrichment Score: 4.497162829121329

| Category       | Term                           | Count | %                 | PValue               | Genes                                          | FDR                  |
|----------------|--------------------------------|-------|-------------------|----------------------|------------------------------------------------|----------------------|
| INTERPRO       | IPR000738:WHEP-TRS             | 6     | 0.671892497200448 | 3.58339590976844E-07 | P32921, Q68FL6, Q8CGC7, Q8BH61, Q9CZD3, Q61035 | 3.24173042085191E-05 |
| SMART          | SM00991:SM00991                | 6     | 0.671892497200448 | 3.94811793585588E-07 | P32921, Q68FL6, Q8CGC7, Q8BH61, Q9CZD3, Q61035 | 3.76336944136393E-05 |
| INTERPRO       | IPR009068:S15/NS1, RNA-binding | 5     | 0.559910414333707 | 5.47799197704691E-05 | P32921, Q68FL6, Q8CGC7, Q9CZD3, Q61035         | 0.003498769658383    |
| UP_SEQ_FEATURE | domain:WHEP-TRS                | 4     | 0.447928331466965 | 0.000271058365123    | P32921, Q68FL6, Q9CZD3, Q61035                 | 0.048519447356932    |

**Annotation Cluster 12** Enrichment Score: 4.063436394191277

| Category     | Term                                 | Count | %                | PValue              | Genes                                                                                                                                                                                                                                                                  | FDR                  |
|--------------|--------------------------------------|-------|------------------|---------------------|------------------------------------------------------------------------------------------------------------------------------------------------------------------------------------------------------------------------------------------------------------------------|----------------------|
| KEGG_PATHWAY | mmu01130:Biosynthesis of antibiotics | 33    | 3.69540873460246 | 1.7865004115296E-07 | Q99K85, Q99JW2, Q9DCD0, Q9WTP7, Q9CQ60, Q9R1J0, Q3TW96, Q93092, Q9CS42, Q5SUR0, Q8CAY6, Q9CWJ9, P12382, P58044, Q8JZK9, Q91V92, Q9Z0S1, Q9D0F9, P47856, Q9WV85, Q91Y10, Q3TRM8, Q64737, Q08739, Q8VCN5, P54822, Q8VEE0, Q9JHU9, O88844, Q8CHP8, P17182, Q9WUA3, P05201 | 1.31010030178837E-05 |
| KEGG_PATHWAY | mmu01230:Biosynthesis of amino acids | 13    | 1.45576707726764 | 0.000820170702319   | Q99K85, Q99JW2, Q91Y10, Q93092, Q9CS42, Q8VCN5, P12382, Q8VEE0, Q3THS6, O88844, P17182, Q9WUA3, P05201                                                                                                                                                                 | 0.016403414046382    |
| KEGG_PATHWAY | mmu01200:Carbon metabolism           | 15    | 1.67973124300112 | 0.004403352418593   | Q99K85, Q3TRM8, Q9DCD0, Q9R0P3, Q9CQ60, Q93092, Q9CS42, Q8CAY6, P12382, Q8VEE0, O88844, Q8CHP8, P17182, Q9WUA3, P05201                                                                                                                                                 | 0.048436876604523    |

**Annotation Cluster 13** Enrichment Score: 4.043509348525895

| Category                                                          | Term                                                                       | Count | %                 | PValue               | Genes                                                                                                                                                                                                                                                                                                                          | FDR                  |
|-------------------------------------------------------------------|----------------------------------------------------------------------------|-------|-------------------|----------------------|--------------------------------------------------------------------------------------------------------------------------------------------------------------------------------------------------------------------------------------------------------------------------------------------------------------------------------|----------------------|
| UP_SEQ_FEATURE                                                    | nucleotide phosphate-binding region:NADP                                   | 15    | 1.67973124300112  | 2.08945689526069E-07 | P23591, Q91YR9, Q8BVI4, Q64105, Q99MZ7, Q922D8, P62482, O88844, P45377, Q8K2T1, Q91Z53, P48758, Q91X52, P00375, P21300                                                                                                                                                                                                         | 0.000137138020892    |
| UP_KEYWORDS                                                       | NADP                                                                       | 20    | 2.23964165733483  | 6.27338543170864E-06 | P23591, Q91YR9, P19096, Q9JMH6, Q9DCD0, Q8BVI4, Q64105, Q99MZ7, Q922D8, Q8K0C9, Q9JLT4, P62482, O88844, P45377, Q8K2T1, Q91Z53, P48758, Q91X52, P00375, P21300                                                                                                                                                                 | 6.10032652324771E-05 |
| UP_SEQ_FEATURE                                                    | binding site:NADP                                                          | 8     | 0.895856662933931 | 4.95118584634787E-05 | Q8K0C9, Q91YR9, P62482, O88844, Q8K2T1, Q91Z53, Q64105, Q922D8                                                                                                                                                                                                                                                                 | 0.011921138533456    |
| UP_KEYWORDS                                                       | Oxidoreductase                                                             | 40    | 4.47928331466965  | 0.000214008286471    | P23591, P09528, Q91YR9, O08807, P19096, P99029, Q9JMH6, Q9DCD0, Q8R2E9, Q8BVI4, Q9R1J0, Q64105, Q62465, Q922D8, Q8C0L6, Q9JLT4, P61982, P45377, Q91Z53, P62259, Q91YT0, P21300, Q00519, Q91X52, O70325, Q9CQV8, Q8BSY0, P68254, Q8R180, Q99MZ7, P20108, Q91VD9, Q9Z0X1, P62482, O88844, O09131, P24547, P48758, P07742, P00375 | 0.001471959433775    |
| <b>Annotation Cluster 14</b> Enrichment Score: 3.8190555663749297 |                                                                            |       |                   |                      |                                                                                                                                                                                                                                                                                                                                |                      |
| Category                                                          | Term                                                                       | Count | %                 | PValue               | Genes                                                                                                                                                                                                                                                                                                                          | FDR                  |
| UP_KEYWORDS                                                       | Purine biosynthesis                                                        | 8     | 0.895856662933931 | 6.29139679100756E-08 | Q9CWXJ9, Q64737, P24547, P46664, Q3THK7, Q5SUR0, P54822, Q922D8                                                                                                                                                                                                                                                                | 8.448447119353E-07   |
| GOTERM_BP_DIRECT                                                  | GO:0006164~purine nucleotide biosynthetic process                          | 8     | 0.895856662933931 | 7.18266001293964E-06 | Q9CWXJ9, Q64737, P24547, P46664, Q3THK7, Q5SUR0, P54822, Q922D8                                                                                                                                                                                                                                                                | 0.001179392774125    |
| GOTERM_BP_DIRECT                                                  | GO:0006189~de novo IMP biosynthetic process                                | 4     | 0.447928331466965 | 0.001121247956221    | Q9CWXJ9, Q64737, Q5SUR0, P54822                                                                                                                                                                                                                                                                                                | 0.070811120927489    |
| <b>Annotation Cluster 15</b> Enrichment Score: 3.5114946149023094 |                                                                            |       |                   |                      |                                                                                                                                                                                                                                                                                                                                |                      |
| Category                                                          | Term                                                                       | Count | %                 | PValue               | Genes                                                                                                                                                                                                                                                                                                                          | FDR                  |
| GOTERM_MF_DIRECT                                                  | GO:0008641~small protein activating enzyme activity                        | 6     | 0.671892497200448 | 2.35520201600397E-05 | Q9R1T2, Q9Z1F9, Q8VBW6, Q9D906, Q8VE47, Q02053                                                                                                                                                                                                                                                                                 | 0.000936960802019    |
| INTERPRO                                                          | IPR000594:UBA/THIF-type NAD/FAD binding fold                               | 6     | 0.671892497200448 | 2.37046626033684E-05 | Q9R1T2, Q9Z1F9, Q8VBW6, Q9D906, Q8VE47, Q02053                                                                                                                                                                                                                                                                                 | 0.001582824971107    |
| <b>Annotation Cluster 16</b> Enrichment Score: 3.464097031686257  |                                                                            |       |                   |                      |                                                                                                                                                                                                                                                                                                                                |                      |
| Category                                                          | Term                                                                       | Count | %                 | PValue               | Genes                                                                                                                                                                                                                                                                                                                          | FDR                  |
| INTERPRO                                                          | IPR006195:Aminoacyl-tRNA synthetase, class II                              | 8     | 0.895856662933931 | 1.12654918173837E-06 | Q8CGC7, Q8BP47, Q8C0C7, Q9CZD3, P26638, Q922B2, Q61035, Q9D0R2                                                                                                                                                                                                                                                                 | 8.27450373986836E-05 |
| INTERPRO                                                          | IPR002314:Aminoacyl-tRNA synthetase, class II (G/ H/ P/ S), conserved doma | 4     | 0.447928331466965 | 0.002312820943201    | Q8CGC7, Q9CZD3, P26638, Q9D0R2                                                                                                                                                                                                                                                                                                 | 0.070781957615872    |
| <b>Annotation Cluster 17</b> Enrichment Score: 3.2927390997003294 |                                                                            |       |                   |                      |                                                                                                                                                                                                                                                                                                                                |                      |
| Category                                                          | Term                                                                       | Count | %                 | PValue               | Genes                                                                                                                                                                                                                                                                                                                          | FDR                  |
| UP_KEYWORDS                                                       | DNA replication                                                            | 14    | 1.56774916013438  | 1.54883782818429E-05 | P97386, P97311, Q8R3C0, Q99MD9, Q9WUK4, P39749, P37913, Q9CQ71, P35601, Q8VEE4, P49718, O35654, P17918, P07742                                                                                                                                                                                                                 | 0.000140894279854    |
| KEGG_PATHWAY                                                      | mmu03030:DNA replication                                                   | 10    | 1.11982082866741  | 8.29077370649117E-05 | Q8VEE4, P49718, O35654, P97311, P17918, P37913, Q9CQ71, Q9WUK4, P39749, P35601                                                                                                                                                                                                                                                 | 0.003039950359047    |
| GOTERM_BP_DIRECT                                                  | GO:0006260~DNA replication                                                 | 16    | 1.79171332586786  | 0.000102179000032    | P54103, P97386, P97311, Q8R3C0, Q99MD9, Q9WUK4, P39749, P37913, Q9CQ71, P35601, Q8VEE4, P49718, Q9EPU0, O35654, P17918, P07742                                                                                                                                                                                                 | 0.010115370053237    |
| KEGG_PATHWAY                                                      | mmu03430:Mismatch repair                                                   | 8     | 0.895856662933931 | 0.000120035765666    | Q8VEE4, O35654, P54276, P17918, P37913, Q9CQ71, Q9WUK4, P35601                                                                                                                                                                                                                                                                 | 0.003451321689556    |
| KEGG_PATHWAY                                                      | mmu03420:Nucleotide excision repair                                        | 9     | 1.00783874580067  | 0.002414218476252    | Q8VEE4, O35654, Q3U1J4, P17918, P37913, Q9CQ71, Q9WUK4, P54726, P35601                                                                                                                                                                                                                                                         | 0.027954108672389    |
| <b>Annotation Cluster 18</b> Enrichment Score: 3.2455611193619545 |                                                                            |       |                   |                      |                                                                                                                                                                                                                                                                                                                                |                      |
| Category                                                          | Term                                                                       | Count | %                 | PValue               | Genes                                                                                                                                                                                                                                                                                                                          | FDR                  |
| UP_KEYWORDS                                                       | mRNA processing                                                            | 29    | 3.2474804031355   | 1.56037341188773E-06 | Q91VR5, Q61656, O70551, Q9CQQ8, Q99K48, Q62384, Q62189, Q9JKP5, Q9DAR7, Q99KP6, Q6NVF9, Q3TIU4, P62317, Q60749, Q9DBR1, Q569Z6, Q0VGB7, P97376, Q9JLI8, P29341, Q6PDM2, Q61183, O08810, Q3UEB3, P62320, P16110, O08583, Q3U0V1, Q9CQI7                                                                                         | 1.62972334130496E-05 |

|                                                                   |                                                            |       |                   |                      |                                                                                                                                                                                                                                        |                      |
|-------------------------------------------------------------------|------------------------------------------------------------|-------|-------------------|----------------------|----------------------------------------------------------------------------------------------------------------------------------------------------------------------------------------------------------------------------------------|----------------------|
| UP_KEYWORDS                                                       | mRNA splicing                                              | 23    | 2.57558790593505  | 1.85998967566938E-05 | Q0VGB7, Q61656, P97376, O70551, Q9CQQ8, Q9JLI8, P29341, Q99K48, Q6PDM2, Q62384, Q62189, O08810, Q3UEB3, Q9JKP5, P62320, Q9DAR7, O08583, P16110, Q99KP6, Q3U0V1, P62317, Q569Z6, Q9CQI7                                                 | 0.000163911590168    |
| GOTERM_BP_DIRECT                                                  | GO:0006397~mRNA processing                                 | 29    | 3.2474804031355   | 8.29247722434613E-05 | Q91VR5, Q61656, O70551, Q99K48, Q62384, Q62189, Q9JKP5, Q9DAR7, Q99KP6, Q6NVF9, Q3TIU4, P62317, Q60749, P05132, Q9DBR1, Q569Z6, Q0VGB7, P97376, Q9JLI8, P29341, Q6PDM2, Q61183, O08810, Q3UEB3, P62320, P16110, O08583, Q3U0V1, Q9CQI7 | 0.008880161479811    |
| UP_KEYWORDS                                                       | Spliceosome                                                | 13    | 1.45576707726764  | 0.000527217655643    | Q61656, P97376, Q9CQQ8, P29341, Q6PDM2, Q62189, O08810, P62320, O08583, P16110, Q99KP6, P62317, Q9CQI7                                                                                                                                 | 0.003303897308697    |
| GOTERM_BP_DIRECT                                                  | GO:0008380~RNA splicing                                    | 22    | 2.46360582306831  | 0.000603078061376    | Q0VGB7, Q61656, P97376, O70551, Q9JLI8, P29341, Q99K48, Q6PDM2, Q62384, Q62189, O08810, Q3UEB3, Q9JKP5, P62320, Q9DAR7, O08583, P16110, Q99KP6, Q3U0V1, P62317, Q569Z6, Q9CQI7                                                         | 0.042762870924881    |
| GOTERM_CC_DIRECT                                                  | GO:0071013~catalytic step 2 spliceosome                    | 10    | 1.11982082866741  | 0.009583378702083    | P62320, Q61656, P97376, Q99KP6, Q9CQQ8, P29341, Q6PDM2, P62317, O08810, Q9CQI7                                                                                                                                                         | 0.072861864543776    |
| GOTERM_CC_DIRECT                                                  | GO:0005681~spliceosomal complex                            | 12    | 1.3437849944009   | 0.012944475226979    | P62320, Q61656, O08583, P16110, P97376, Q99KP6, P29341, Q6PDM2, P62317, O08810, Q62189, Q9CQI7                                                                                                                                         | 0.091675256059566    |
| <b>Annotation Cluster 19</b> Enrichment Score: 3.216174223679425  |                                                            |       |                   |                      |                                                                                                                                                                                                                                        |                      |
| Category                                                          | Term                                                       | Count | %                 | PValue               | Genes                                                                                                                                                                                                                                  | FDR                  |
| INTERPRO                                                          | IPR024969:Rpn11/EIF3F C-terminal domain                    | 4     | 0.447928331466965 | 0.00018426972214     | Q9DCH4, O35593, O88545, P26516                                                                                                                                                                                                         | 0.010411239300921    |
| SMART                                                             | SM00232:JAB_MPN                                            | 5     | 0.559910414333707 | 0.000723032576984    | Q76N33, Q9DCH4, O35593, O88545, P26516                                                                                                                                                                                                 | 0.022685147102862    |
| INTERPRO                                                          | IPR000555:JAB1/Mov34/MPN/PAD-1                             | 5     | 0.559910414333707 | 0.000940047780329    | Q76N33, Q9DCH4, O35593, O88545, P26516                                                                                                                                                                                                 | 0.034523254732585    |
| UP_SEQ_FEATURE                                                    | domain:MPN                                                 | 5     | 0.559910414333707 | 0.001090288247402    | Q76N33, Q9DCH4, O35593, O88545, P26516                                                                                                                                                                                                 | 0.119265419951889    |
| <b>Annotation Cluster 20</b> Enrichment Score: 3.215399339830062  |                                                            |       |                   |                      |                                                                                                                                                                                                                                        |                      |
| Category                                                          | Term                                                       | Count | %                 | PValue               | Genes                                                                                                                                                                                                                                  | FDR                  |
| INTERPRO                                                          | IPR023409:14-3-3 protein, conserved site                   | 7     | 0.783874580067189 | 1.50334513332797E-08 | P63101, O70456, Q9CQV8, P68510, P68254, P61982, P62259                                                                                                                                                                                 | 3.8624607819365E-06  |
| INTERPRO                                                          | IPR000308:14-3-3 protein                                   | 7     | 0.783874580067189 | 5.828232065999E-08   | P63101, O70456, Q9CQV8, P68510, P68254, P61982, P62259                                                                                                                                                                                 | 8.56167290495253E-06 |
| SMART                                                             | SM00101:14_3_3                                             | 7     | 0.783874580067189 | 6.52100186603694E-08 | P63101, O70456, Q9CQV8, P68510, P68254, P61982, P62259                                                                                                                                                                                 | 1.63677146837527E-05 |
| INTERPRO                                                          | IPR023410:14-3-3 domain                                    | 7     | 0.783874580067189 | 1.69466887644541E-07 | P63101, O70456, Q9CQV8, P68510, P68254, P61982, P62259                                                                                                                                                                                 | 2.26315325408937E-05 |
| PIR_SUPERFAMILY                                                   | PIRSF000868:14-3-3 protein                                 | 7     | 0.783874580067189 | 4.79320149114403E-07 | P63101, O70456, Q9CQV8, P68510, P68254, P61982, P62259                                                                                                                                                                                 | 5.03286156570123E-05 |
| UP_SEQ_FEATURE                                                    | site:Interaction with phosphoserine on interacting protein | 7     | 0.783874580067189 | 1.86782798650331E-06 | P63101, O70456, Q9CQV8, P68510, P68254, P61982, P62259                                                                                                                                                                                 | 0.000525393329346    |
| KEGG_PATHWAY                                                      | mmu04114:Oocyte meiosis                                    | 16    | 1.79171332586786  | 0.001144501115447    | Q9CQV8, P68254, P11440, P18654, P68181, Q76MZ3, P63101, P68510, P63085, P63328, P0DP26, O54988, P61982, P62715, P05132, P62259                                                                                                         | 0.017741252164662    |
| KEGG_PATHWAY                                                      | mmu04110:Cell cycle                                        | 15    | 1.67973124300112  | 0.007942823413915    | Q64701, O70456, Q9CQV8, P97311, P68254, P11440, P63101, P49718, P68510, Q64261, P17918, P61982, Q9WVA3, P25322, P62259                                                                                                                 | 0.072809214627559    |
| <b>Annotation Cluster 21</b> Enrichment Score: 3.168653057469934  |                                                            |       |                   |                      |                                                                                                                                                                                                                                        |                      |
| Category                                                          | Term                                                       | Count | %                 | PValue               | Genes                                                                                                                                                                                                                                  | FDR                  |
| KEGG_PATHWAY                                                      | mmu00030:Pentose phosphate pathway                         | 9     | 1.00783874580067  | 0.000156878258616    | Q91YP3, P12382, Q8VEE0, Q9DCD0, Q9CQ60, Q9WUA3, Q9D0F9, Q93092, Q9CS42                                                                                                                                                                 | 0.003451321689556    |
| GOTERM_MF_DIRECT                                                  | GO:0048029~monosaccharide binding                          | 6     | 0.671892497200448 | 0.000332780516517    | P12382, P16110, Q8VEE0, Q8CGY8, Q9CQ60, Q93092                                                                                                                                                                                         | 0.010499799055629    |
| <b>Annotation Cluster 22</b> Enrichment Score: 2.9038329971221266 |                                                            |       |                   |                      |                                                                                                                                                                                                                                        |                      |
| Category                                                          | Term                                                       | Count | %                 | PValue               | Genes                                                                                                                                                                                                                                  | FDR                  |
| UP_KEYWORDS                                                       | Elongation factor                                          | 7     | 0.783874580067189 | 8.2284948590384E-05  | Q8BFR5, P10711, P58252, Q9D8N0, P63242, P57776, O08810                                                                                                                                                                                 | 0.00062714474331     |
| GOTERM_MF_DIRECT                                                  | GO:0003746~translation elongation factor activity          | 7     | 0.783874580067189 | 0.000637259352399    | Q8BFR5, P10711, P58252, Q9D8N0, P63242, P57776, O08810                                                                                                                                                                                 | 0.017755455761237    |
| <b>Annotation Cluster 23</b> Enrichment Score: 2.8600012085370294 |                                                            |       |                   |                      |                                                                                                                                                                                                                                        |                      |
| Category                                                          | Term                                                       | Count | %                 | PValue               | Genes                                                                                                                                                                                                                                  | FDR                  |

|                                                                   |                                                                              |       |                   |                      |                                                                                                                                                                |                   |
|-------------------------------------------------------------------|------------------------------------------------------------------------------|-------|-------------------|----------------------|----------------------------------------------------------------------------------------------------------------------------------------------------------------|-------------------|
| UP_KEYWORDS                                                       | Endocytosis                                                                  | 15    | 1.67973124300112  | 3.81629618512232E-05 | Q91ZR2, Q91ZX7, P98078, Q8VD75, Q80TY0, Q62418, Q9Z0R6, Q9CR95, O08539, P17427, P97814, P17426, P84091, Q6PAR5, Q60902                                         | 0.000316528095354 |
| GOTERM_BP_DIRECT                                                  | GO:0006897~endocytosis                                                       | 20    | 2.23964165733483  | 0.000102673264852    | Q8BH43, Q91ZR2, Q91ZX7, P98078, Q8BVE3, Q8VD75, Q80TY0, Q62418, Q9Z0R6, Q9CR95, O08539, P17427, P97814, P17426, P84091, Q6PAR5, Q6P8X1, O08553, Q60902, Q8BL66 | 0.010115370053237 |
| UP_KEYWORDS                                                       | Coated pit                                                                   | 8     | 0.895856662933931 | 0.001111682854171    | Q91ZX7, P98078, Q80TY0, Q60902, Q68FD5, P17427, P17426, P84091                                                                                                 | 0.006397848262782 |
| GOTERM_CC_DIRECT                                                  | GO:0005905~clathrin-coated pit                                               | 9     | 1.00783874580067  | 0.001656136203265    | Q91ZX7, P98078, Q80TY0, Q9CR95, Q60902, Q68FD5, P17427, P17426, P84091                                                                                         | 0.016373601413773 |
| <b>Annotation Cluster 24</b> Enrichment Score: 2.664318982756836  |                                                                              |       |                   |                      |                                                                                                                                                                |                   |
| Category                                                          | Term                                                                         | Count | %                 | PValue               | Genes                                                                                                                                                          | FDR               |
| INTERPRO                                                          | IPR017926:Glutamine amidotransferase                                         | 4     | 0.447928331466965 | 0.00087228730895     | B2RQC6, Q3THK7, P70698, Q5SUR0                                                                                                                                 | 0.032856155303782 |
| GOTERM_BP_DIRECT                                                  | GO:0006541~glutamine metabolic process                                       | 6     | 0.671892497200448 | 0.000895017093113    | B2RQC6, Q3THK7, P47856, P70698, Q5SUR0, Q9JHW2                                                                                                                 | 0.058011239482539 |
| UP_KEYWORDS                                                       | Glutamine amidotransferase                                                   | 4     | 0.447928331466965 | 0.001808295894618    | Q3THK7, P47856, P70698, Q5SUR0                                                                                                                                 | 0.00927162623316  |
| <b>Annotation Cluster 25</b> Enrichment Score: 2.5790777804976757 |                                                                              |       |                   |                      |                                                                                                                                                                |                   |
| Category                                                          | Term                                                                         | Count | %                 | PValue               | Genes                                                                                                                                                          | FDR               |
| INTERPRO                                                          | IPR013041:Coatomer/clathrin adaptor appendage, Ig-like subdomain             | 5     | 0.559910414333707 | 0.000669926697959    | O35643, Q8R0H9, Q9QXK3, P17427, P17426                                                                                                                         | 0.027336731091705 |
| GOTERM_CC_DIRECT                                                  | GO:0030117~membrane coat                                                     | 7     | 0.783874580067189 | 0.000725676155433    | O35643, Q8CIE6, P61924, Q9QXK3, Q68FD5, P17427, P17426                                                                                                         | 0.008932727913309 |
| INTERPRO                                                          | IPR009028:Coatomer/clathrin adaptor appendage, C-terminal subdomain          | 4     | 0.447928331466965 | 0.00087228730895     | O35643, Q9QXK3, P17427, P17426                                                                                                                                 | 0.032856155303782 |
| INTERPRO                                                          | IPR008152:Clathrin adaptor, alpha/beta/gamma-adaptin, appendage, Ig-like su  | 4     | 0.447928331466965 | 0.003376207682554    | O35643, Q8R0H9, P17427, P17426                                                                                                                                 | 0.095377867032156 |
| SMART                                                             | SM00809:Alpha_adaptinC2                                                      | 4     | 0.447928331466965 | 0.003581500675026    | O35643, Q8R0H9, P17427, P17426                                                                                                                                 | 0.0691505130332   |
| GOTERM_CC_DIRECT                                                  | GO:0030131~clathrin adaptor complex                                          | 5     | 0.559910414333707 | 0.004747227331017    | O35643, Q8R0H9, P17427, P17426, P84091                                                                                                                         | 0.042315802243725 |
| <b>Annotation Cluster 26</b> Enrichment Score: 2.569620879648123  |                                                                              |       |                   |                      |                                                                                                                                                                |                   |
| Category                                                          | Term                                                                         | Count | %                 | PValue               | Genes                                                                                                                                                          | FDR               |
| GOTERM_CC_DIRECT                                                  | GO:0008180~COP9 signalosome                                                  | 7     | 0.783874580067189 | 0.001230991473026    | Q8VBV7, Q8BV13, P63168, Q8VDD5, Q9CZ04, Q03265, O88545                                                                                                         | 0.013450572740493 |
| UP_KEYWORDS                                                       | Signalosome                                                                  | 4     | 0.447928331466965 | 0.003686560310303    | Q8VBV7, Q8BV13, Q9CZ04, O88545                                                                                                                                 | 0.016501746150881 |
| <b>Annotation Cluster 27</b> Enrichment Score: 2.445688237855775  |                                                                              |       |                   |                      |                                                                                                                                                                |                   |
| Category                                                          | Term                                                                         | Count | %                 | PValue               | Genes                                                                                                                                                          | FDR               |
| INTERPRO                                                          | IPR004161:Translation elongation factor EFTu/EF1A, domain 2                  | 6     | 0.671892497200448 | 9.38046678400298E-05 | Q8BFR5, Q8R050, Q9Z0N1, P58252, Q05D44, O08810                                                                                                                 | 0.00551196228228  |
| INTERPRO                                                          | IPR009000:Translation elongation/initiation factor/Ribosomal, beta-barrel    | 7     | 0.783874580067189 | 0.000515169003137    | Q8BFR5, Q8R050, Q9Z0N1, P58252, Q05D44, O08810, Q8BGQ7                                                                                                         | 0.023649477050261 |
| INTERPRO                                                          | IPR000795:Elongation factor, GTP-binding domain                              | 6     | 0.671892497200448 | 0.000606268748722    | Q8BFR5, Q8R050, Q9Z0N1, P58252, Q05D44, O08810                                                                                                                 | 0.026988145208267 |
| <b>Annotation Cluster 28</b> Enrichment Score: 2.3747755673357    |                                                                              |       |                   |                      |                                                                                                                                                                |                   |
| Category                                                          | Term                                                                         | Count | %                 | PValue               | Genes                                                                                                                                                          | FDR               |
| GOTERM_CC_DIRECT                                                  | GO:0030117~membrane coat                                                     | 7     | 0.783874580067189 | 0.000725676155433    | O35643, Q8CIE6, P61924, Q9QXK3, Q68FD5, P17427, P17426                                                                                                         | 0.008932727913309 |
| GOTERM_CC_DIRECT                                                  | GO:0030126~COPI vesicle coat                                                 | 4     | 0.447928331466965 | 0.008822437760591    | Q8CIE6, P61924, Q9QXK3, Q5XJY5                                                                                                                                 | 0.068077616749634 |
| <b>Annotation Cluster 29</b> Enrichment Score: 2.3642976995714995 |                                                                              |       |                   |                      |                                                                                                                                                                |                   |
| Category                                                          | Term                                                                         | Count | %                 | PValue               | Genes                                                                                                                                                          | FDR               |
| SMART                                                             | SM00165:UBA                                                                  | 8     | 0.895856662933931 | 0.000204381089233    | Q922Y1, Q91VX2, P56399, P61087, P22682, P54726, Q8R317, Q80X50                                                                                                 | 0.008836527267224 |
| INTERPRO                                                          | IPR009060:UBA-like                                                           | 9     | 1.00783874580067  | 0.001103257714486    | Q922Y1, Q91VX2, P56399, P61087, P22682, P54726, Q8R317, Q80X50, Q6P5G6                                                                                         | 0.039528916648289 |
| INTERPRO                                                          | IPR015940:Ubiquitin-associated/translation elongation factor EF1B, N-termina | 8     | 0.895856662933931 | 0.002047584129957    | Q922Y1, Q91VX2, P56399, P61087, P22682, P54726, Q8R317, Q80X50                                                                                                 | 0.066842246375716 |
| <b>Annotation Cluster 30</b> Enrichment Score: 2.3630367821479115 |                                                                              |       |                   |                      |                                                                                                                                                                |                   |
| Category                                                          | Term                                                                         | Count | %                 | PValue               | Genes                                                                                                                                                          | FDR               |

|                                                                   |                                                      |       |                   |                      |                                                                                                                                                                        |                   |
|-------------------------------------------------------------------|------------------------------------------------------|-------|-------------------|----------------------|------------------------------------------------------------------------------------------------------------------------------------------------------------------------|-------------------|
| UP_KEYWORDS                                                       | DNA recombination                                    | 9     | 1.00783874580067  | 0.002204085773633    | Q8VEE4, P97386, P28352, P60122, Q99K48, Q9WTM5, Q9WUP7, P37913, Q9CQ71                                                                                                 | 0.010904424353763 |
| UP_KEYWORDS                                                       | DNA repair                                           | 20    | 2.23964165733483  | 0.002640147463894    | P62908, P97386, P28352, P54276, Q9Z255, Q3U1J4, Q99K48, O35593, Q9WTM5, Q9WUP7, P11103, P39749, P37913, Q9CQ71, P54726, Q8VEE4, Q9JLV6, P60122, Q99KP6, P17918         | 0.012408693080302 |
| UP_KEYWORDS                                                       | DNA damage                                           | 21    | 2.35162374020157  | 0.009096418905288    | P62908, P97386, P28352, P54276, Q9Z255, Q3U1J4, Q99K48, O35593, Q9WTM5, Q9WUP7, P11103, P39749, P37913, Q9CQ71, P54726, Q8VEE4, Q9JLV6, P60122, Q99KP6, P17918, P49138 | 0.036645573304159 |
| <b>Annotation Cluster 31</b> Enrichment Score: 2.3623257815888565 |                                                      |       |                   |                      |                                                                                                                                                                        |                   |
| Category                                                          | Term                                                 | Count | %                 | PValue               | Genes                                                                                                                                                                  | FDR               |
| UP_KEYWORDS                                                       | TPR repeat                                           | 15    | 1.67973124300112  | 0.000326240676303    | Q60864, Q8BSY0, O70145, Q99MD9, Q8CGY8, Q9CR16, Q9D2X5, Q99L47, Q64378, Q9CYG7, O88447, Q80UM3, Q5SW19, Q9D706, Q9QYI3                                                 | 0.002190473112318 |
| SMART                                                             | SM00028:TPR                                          | 14    | 1.56774916013438  | 0.000446907748807    | Q60864, Q8BSY0, O70145, Q99MD9, Q8CGY8, Q9CR16, Q9D2X5, Q99L47, Q64378, Q9CYG7, O88447, Q80UM3, Q9D706, Q9QYI3                                                         | 0.016024834992922 |
| UP_SEQ_FEATURE                                                    | repeat:TPR 3                                         | 15    | 1.67973124300112  | 0.000647795050102    | Q60864, Q8BSY0, O70145, Q99MD9, Q8CGY8, Q9CR16, Q9D2X5, Q99L47, Q64378, Q9CYG7, O88447, Q80UM3, Q5SW19, Q9D706, Q9QYI3                                                 | 0.100309912461739 |
| INTERPRO                                                          | IPR019734:Tetratricopeptide repeat                   | 14    | 1.56774916013438  | 0.000660753306421    | Q60864, Q8BSY0, O70145, Q99MD9, Q8CGY8, Q9CR16, Q9D2X5, Q99L47, Q64378, Q9CYG7, O88447, Q80UM3, Q9D706, Q9QYI3                                                         | 0.027336731091705 |
| INTERPRO                                                          | IPR001440:Tetratricopeptide TPR-1                    | 6     | 0.671892497200448 | 0.001202514508142    | Q60864, Q9CYG7, O70145, Q8CGY8, Q9D706, Q64378                                                                                                                         | 0.042059376487158 |
| INTERPRO                                                          | IPR011990:Tetratricopeptide-like helical             | 18    | 2.01567749160134  | 0.001261035274539    | Q60864, Q8BSY0, O70145, Q9JLI8, Q99MD9, Q8CGY8, Q9CR16, Q68FD5, Q9D2X5, Q99L47, Q64378, Q99J14, Q9CYG7, O88447, Q80UM3, Q5SW19, Q9D706, Q9QYI3                         | 0.043080484146449 |
| INTERPRO                                                          | IPR013026:Tetratricopeptide repeat-containing domain | 13    | 1.45576707726764  | 0.001381214692085    | Q60864, Q8BSY0, O70145, Q99MD9, Q8CGY8, Q9CR16, Q99L47, Q64378, Q9CYG7, O88447, Q80UM3, Q9D706, Q9QYI3                                                                 | 0.046113735969838 |
| <b>Annotation Cluster 32</b> Enrichment Score: 2.3542239936537666 |                                                      |       |                   |                      |                                                                                                                                                                        |                   |
| Category                                                          | Term                                                 | Count | %                 | PValue               | Genes                                                                                                                                                                  | FDR               |
| GOTERM_CC_DIRECT                                                  | GO:0015935~small ribosomal subunit                   | 7     | 0.783874580067189 | 0.000599238169022    | P62908, P14131, P62702, Q924T2, P25444, P62852, P62843                                                                                                                 | 0.007745153334615 |
| GOTERM_CC_DIRECT                                                  | GO:0022627~cytosolic small ribosomal subunit         | 9     | 1.00783874580067  | 0.000720875786436    | P62908, P14131, P63323, P62702, P62082, P25444, P62852, Q62167, P62843                                                                                                 | 0.008932727913309 |
| <b>Annotation Cluster 33</b> Enrichment Score: 2.346081648361987  |                                                      |       |                   |                      |                                                                                                                                                                        |                   |
| Category                                                          | Term                                                 | Count | %                 | PValue               | Genes                                                                                                                                                                  | FDR               |
| INTERPRO                                                          | IPR001494:Importin-beta, N-terminal                  | 7     | 0.783874580067189 | 1.94588343630614E-05 | Q91YE6, Q9ERK4, Q8BFY9, Q924C1, P70168, Q6P5F9, Q8BKC5                                                                                                                 | 0.001361191794254 |
| SMART                                                             | SM00913:SM00913                                      | 6     | 0.671892497200448 | 0.000211231727503    | Q91YE6, Q9ERK4, Q8BFY9, Q924C1, P70168, Q6P5F9                                                                                                                         | 0.008836527267224 |
| UP_SEQ_FEATURE                                                    | domain:Importin N-terminal                           | 6     | 0.671892497200448 | 0.000250515489755    | Q91YE6, Q9ERK4, Q8BFY9, P70168, Q6P5F9, Q8BKC5                                                                                                                         | 0.048519447356932 |
| GOTERM_MF_DIRECT                                                  | GO:0008536~Ran GTPase binding                        | 8     | 0.895856662933931 | 0.00030643682235     | Q91YE6, Q9ERK4, Q9CT10, Q8BFY9, Q924C1, P70168, Q6P5F9, Q8BKC5                                                                                                         | 0.010013917587499 |
| UP_SEQ_FEATURE                                                    | repeat:HEAT 6                                        | 7     | 0.783874580067189 | 0.000679498877226    | A2AGT5, Q9QXK3, Q8BFY9, P70168, Q6P5F9, Q8BKC5, Q76MZ3                                                                                                                 | 0.100309912461739 |
| UP_SEQ_FEATURE                                                    | repeat:HEAT 2                                        | 9     | 1.00783874580067  | 0.000812541579811    | Q8BQM4, A2AGT5, Q9QXK3, Q9DBQ7, Q8BFY9, P70168, Q6P5F9, Q8BKC5, Q76MZ3                                                                                                 | 0.100309912461739 |
| UP_SEQ_FEATURE                                                    | repeat:HEAT 1                                        | 9     | 1.00783874580067  | 0.000812541579811    | Q8BQM4, A2AGT5, Q9QXK3, Q9DBQ7, Q8BFY9, P70168, Q6P5F9, Q8BKC5, Q76MZ3                                                                                                 | 0.100309912461739 |
| UP_SEQ_FEATURE                                                    | repeat:HEAT 4                                        | 8     | 0.895856662933931 | 0.000815113559872    | A2AGT5, Q9QXK3, Q9DBQ7, Q8BFY9, P70168, Q6P5F9, Q8BKC5, Q76MZ3                                                                                                         | 0.100309912461739 |
| <b>Annotation Cluster 34</b> Enrichment Score: 2.2985441125723307 |                                                      |       |                   |                      |                                                                                                                                                                        |                   |
| Category                                                          | Term                                                 | Count | %                 | PValue               | Genes                                                                                                                                                                  | FDR               |

|                                                                   |                                                                |       |                   |                     |                                                                                                                                                                                                                                                                        |                   |
|-------------------------------------------------------------------|----------------------------------------------------------------|-------|-------------------|---------------------|------------------------------------------------------------------------------------------------------------------------------------------------------------------------------------------------------------------------------------------------------------------------|-------------------|
| UP_KEYWORDS                                                       | SH3-binding                                                    | 9     | 1.00783874580067  | 0.000798446177658   | Q9JJU8, Q9JLQ0, Q3UIA2, Q5FWK3, Q60749, Q8BPU7, Q61036, Q9ESS2, Q80U87                                                                                                                                                                                                 | 0.004894822219555 |
| GOTERM_MF_DIRECT                                                  | GO:0017124~SH3 domain binding                                  | 13    | 1.45576707726764  | 0.003153260407963   | Q9WU78, P29351, Q3UIA2, P70315, Q9ESS2, Q61036, Q80U87, Q9JJU8, Q9JLQ0, Q5FWK3, Q60749, Q8BPU7, P22682                                                                                                                                                                 | 0.067098448215957 |
| <b>Annotation Cluster 35</b> Enrichment Score: 2.2824731423621722 |                                                                |       |                   |                     |                                                                                                                                                                                                                                                                        |                   |
| Category                                                          | Term                                                           | Count | %                 | PValue              | Genes                                                                                                                                                                                                                                                                  | FDR               |
| GOTERM_MF_DIRECT                                                  | GO:0004177~aminopeptidase activity                             | 7     | 0.783874580067189 | 0.000783398107006   | Q64514, Q99KK7, O08663, Q6P1B1, Q6NSR8, Q8R016, Q11011                                                                                                                                                                                                                 | 0.021082625526779 |
| UP_KEYWORDS                                                       | Aminopeptidase                                                 | 6     | 0.671892497200448 | 0.001006574242508   | Q64514, Q99KK7, O08663, Q6P1B1, Q6NSR8, Q11011                                                                                                                                                                                                                         | 0.005913623674736 |
| <b>Annotation Cluster 36</b> Enrichment Score: 2.2331888578166095 |                                                                |       |                   |                     |                                                                                                                                                                                                                                                                        |                   |
| Category                                                          | Term                                                           | Count | %                 | PValue              | Genes                                                                                                                                                                                                                                                                  | FDR               |
| GOTERM_BP_DIRECT                                                  | GO:0061136~regulation of proteasomal protein catabolic process | 7     | 0.783874580067189 | 3.1618284308173E-05 | P97372, Q9JMA1, O35593, Q9WUP7, P05132, P61290, P97371                                                                                                                                                                                                                 | 0.004326435236168 |
| GOTERM_MF_DIRECT                                                  | GO:0061133~endopeptidase activator activity                    | 4     | 0.447928331466965 | 0.00470875539517    | P97372, O35593, P61290, P97371                                                                                                                                                                                                                                         | 0.094494024502219 |
| GOTERM_CC_DIRECT                                                  | GO:0008537~proteasome activator complex                        | 3     | 0.335946248600224 | 0.007920738658179   | P97372, P61290, P97371                                                                                                                                                                                                                                                 | 0.064126464678606 |
| <b>Annotation Cluster 37</b> Enrichment Score: 2.21044117980303   |                                                                |       |                   |                     |                                                                                                                                                                                                                                                                        |                   |
| Category                                                          | Term                                                           | Count | %                 | PValue              | Genes                                                                                                                                                                                                                                                                  | FDR               |
| UP_KEYWORDS                                                       | Protease                                                       | 33    | 3.69540873460246  | 0.001330649885822   | Q6P1B1, P29452, B2RRE7, P56399, Q8K2H2, O35593, Q9DCH4, Q9WUP7, Q9R1P4, Q8C0M9, P61290, Q80U87, P62196, Q9Z2U1, O09061, O89023, Q64514, Q8R5H1, P10605, Q9JMA1, P70195, Q6NSR8, Q76N33, Q920A5, P35123, P70677, Q99KK7, O08663, Q9QUM9, Q8R016, Q8BHG1, Q9D1A2, Q11011 | 0.007216216688497 |
| UP_KEYWORDS                                                       | Thiol protease                                                 | 13    | 1.45576707726764  | 0.001740594126442   | P10605, Q8R5H1, P29452, B2RRE7, Q9JMA1, P56399, Q9DCH4, Q8K2H2, Q9WUP7, P35123, P70677, Q80U87, Q8R016                                                                                                                                                                 | 0.009089769326976 |
| <b>Annotation Cluster 38</b> Enrichment Score: 2.0514495825981833 |                                                                |       |                   |                     |                                                                                                                                                                                                                                                                        |                   |
| Category                                                          | Term                                                           | Count | %                 | PValue              | Genes                                                                                                                                                                                                                                                                  | FDR               |
| UP_KEYWORDS                                                       | Redox-active center                                            | 9     | 1.00783874580067  | 0.000143373794576   | P20108, Q9JLT4, O08807, Q9CQM5, P99029, Q80Y14, Q9JMH6, Q8R2E9, Q8R180                                                                                                                                                                                                 | 0.001010785251761 |
| <b>Annotation Cluster 39</b> Enrichment Score: 1.9602095445402905 |                                                                |       |                   |                     |                                                                                                                                                                                                                                                                        |                   |
| Category                                                          | Term                                                           | Count | %                 | PValue              | Genes                                                                                                                                                                                                                                                                  | FDR               |
| INTERPRO                                                          | IPR004087:K Homology domain                                    | 7     | 0.783874580067189 | 0.002270938168644   | Q9CPS7, Q9CPN8, Q3U0V1, Q60749, Q8VDJ3, Q61990, Q61584                                                                                                                                                                                                                 | 0.070781957615872 |
| SMART                                                             | SM00322:KH                                                     | 7     | 0.783874580067189 | 0.002504740781806   | Q9CPS7, Q9CPN8, Q3U0V1, Q60749, Q8VDJ3, Q61990, Q61584                                                                                                                                                                                                                 | 0.062868993623321 |
| <b>Annotation Cluster 40</b> Enrichment Score: 1.8461163831498977 |                                                                |       |                   |                     |                                                                                                                                                                                                                                                                        |                   |
| Category                                                          | Term                                                           | Count | %                 | PValue              | Genes                                                                                                                                                                                                                                                                  | FDR               |
| KEGG_PATHWAY                                                      | mmu03420:Nucleotide excision repair                            | 9     | 1.00783874580067  | 0.002414218476252   | Q8VEE4, O35654, Q3UIJ4, P17918, P37913, Q9CQ71, Q9WUK4, P54726, P35601                                                                                                                                                                                                 | 0.027954108672389 |
| <b>Annotation Cluster 41</b> Enrichment Score: 1.8413090281197508 |                                                                |       |                   |                     |                                                                                                                                                                                                                                                                        |                   |
| Category                                                          | Term                                                           | Count | %                 | PValue              | Genes                                                                                                                                                                                                                                                                  | FDR               |
| GOTERM_CC_DIRECT                                                  | GO:0005903~brush border                                        | 12    | 1.3437849944009   | 0.000127312798568   | Q9JMH9, Q9Z0G0, Q7TPR4, Q8VDD5, P57780, Q61879, Q8BTM8, Q6URW6, P47754, O08638, Q9QXS1, Q91XS2                                                                                                                                                                         | 0.002056897401865 |
| UP_KEYWORDS                                                       | Motor protein                                                  | 14    | 1.56774916013438  | 0.000345117921759   | Q6P9P6, Q9JMH9, P28740, Q61879, O08638, P70248, P63168, Q8VDD5, P33174, P51807, O88447, Q6URW6, Q9JHU4, Q8R1Q8                                                                                                                                                         | 0.002263331486888 |
| INTERPRO                                                          | IPR027401:Myosin-like IQ motif-containing domain               | 6     | 0.671892497200448 | 0.000355821194791   | Q9JMH9, Q8VDD5, Q61879, Q6URW6, O08638, Q9JKF1                                                                                                                                                                                                                         | 0.017423377838263 |
| GOTERM_CC_DIRECT                                                  | GO:0001725~stress fiber                                        | 10    | 1.11982082866741  | 0.000817870652367   | P21107, Q7TPR4, Q8VDD5, P57780, Q61879, Q6URW6, O08638, P07356, P97814, Q80UG5                                                                                                                                                                                         | 0.009833468076131 |
| GOTERM_MF_DIRECT                                                  | GO:0003774~motor activity                                      | 11    | 1.23180291153415  | 0.001348715236776   | Q9QUR7, P63168, Q9JMH9, Q8VDD5, P51807, Q61879, Q6URW6, O08638, Q9JHU4, P70248, Q8R1Q8                                                                                                                                                                                 | 0.032475643201315 |
| GOTERM_CC_DIRECT                                                  | GO:0097513~myosin II filament                                  | 3     | 0.335946248600224 | 0.004060710455295   | Q8VDD5, Q61879, Q6URW6                                                                                                                                                                                                                                                 | 0.036831356234872 |

|                                                                   |                                                    |       |                   |                   |                                                                                        |                   |
|-------------------------------------------------------------------|----------------------------------------------------|-------|-------------------|-------------------|----------------------------------------------------------------------------------------|-------------------|
| GOTERM_CC_DIRECT                                                  | GO:0042641~actomyosin                              | 4     | 0.447928331466965 | 0.006803402650435 | Q9JMH9, Q8VDD5, Q61879, Q6URW6                                                         | 0.057661625742212 |
| UP_KEYWORDS                                                       | Calmodulin-binding                                 | 11    | 1.23180291153415  | 0.017856042544492 | Q3UQ44, Q8VDD5, Q61879, Q62261, Q6URW6, P63328, O08638, Q9JKF1, P70248, A2AN08, Q8VCN5 | 0.06713871996729  |
| UP_KEYWORDS                                                       | Myosin                                             | 6     | 0.671892497200448 | 0.021119713236213 | Q9JMH9, Q8VDD5, Q61879, Q6URW6, O08638, P70248                                         | 0.073542218741895 |
| <b>Annotation Cluster 42</b> Enrichment Score: 1.8274588188480465 |                                                    |       |                   |                   |                                                                                        |                   |
| Category                                                          | Term                                               | Count | %                 | PValue            | Genes                                                                                  | FDR               |
| GOTERM_CC_DIRECT                                                  | GO:0030863~cortical cytoskeleton                   | 8     | 0.895856662933931 | 0.000116897087311 | P21107, Q7TPR4, Q8VDD5, P57780, Q8BTM8, Q62261, P47754, Q9ES52                         | 0.001983742013103 |
| SMART                                                             | SM00033:CH                                         | 9     | 1.00783874580067  | 0.002883586712278 | Q3UQ44, P27870, Q7TPR4, P57780, Q8BTM8, Q62261, Q9JKF1, Q9QXS1, Q9WVA4                 | 0.06579820588925  |
| <b>Annotation Cluster 43</b> Enrichment Score: 1.8079701248952593 |                                                    |       |                   |                   |                                                                                        |                   |
| Category                                                          | Term                                               | Count | %                 | PValue            | Genes                                                                                  | FDR               |
| UP_KEYWORDS                                                       | Nucleotide metabolism                              | 6     | 0.671892497200448 | 0.000819088433107 | Q9WV85, Q9JM14, Q6P3D0, Q3V1L4, O08739, Q3UFY7                                         | 0.004914530598641 |
| <b>Annotation Cluster 44</b> Enrichment Score: 1.77418682420174   |                                                    |       |                   |                   |                                                                                        |                   |
| Category                                                          | Term                                               | Count | %                 | PValue            | Genes                                                                                  | FDR               |
| SMART                                                             | SM00185:ARM                                        | 9     | 1.00783874580067  | 0.000128325693458 | O35643, Q8BNU0, O35344, P30999, E9PVA8, O35343, P70188, P52293, P70168                 | 0.008052437264504 |
| INTERPRO                                                          | IPR000225:Armadillo                                | 9     | 1.00783874580067  | 0.000256723105174 | O35643, Q8BNU0, O35344, P30999, E9PVA8, O35343, P70188, P52293, P70168                 | 0.013967638574108 |
| GOTERM_BP_DIRECT                                                  | GO:0006607~NLS-bearing protein import into nucleus | 6     | 0.671892497200448 | 0.000394170478476 | O35344, O35343, Q8BFY9, P52293, P70168, Q8BKC5                                         | 0.030338809015172 |
| COG_ONTOLOGY                                                      | Intracellular trafficking and secretion            | 10    | 1.11982082866741  | 0.000666035065785 | Q01405, O35344, Q9QXK3, O35343, Q8BFY9, P52293, P70168, O08547, Q9D662, Q8BKC5         | 0.009324490920996 |
| GOTERM_MF_DIRECT                                                  | GO:0008139~nuclear localization sequence binding   | 6     | 0.671892497200448 | 0.002470816138548 | O35344, O35343, Q8BFY9, P52293, P70168, Q8BKC5                                         | 0.055141384555407 |
| <b>Annotation Cluster 45</b> Enrichment Score: 1.740919079615381  |                                                    |       |                   |                   |                                                                                        |                   |
| Category                                                          | Term                                               | Count | %                 | PValue            | Genes                                                                                  | FDR               |
| UP_KEYWORDS                                                       | Citrullination                                     | 11    | 1.23180291153415  | 0.001135118976629 | P03995, O08583, Q62318, Q9D8E6, P43274, P43275, P43277, P25444, P15864, P84228, Q99JF8 | 0.00640207102819  |
| GOTERM_MF_DIRECT                                                  | GO:0031490~chromatin DNA binding                   | 9     | 1.00783874580067  | 0.004750519264592 | Q04207, P28352, P57780, P43274, P43275, Q9WTM5, P43277, P15864, P42227                 | 0.094494024502219 |
| <b>Annotation Cluster 46</b> Enrichment Score: 1.699769025784726  |                                                    |       |                   |                   |                                                                                        |                   |
| Category                                                          | Term                                               | Count | %                 | PValue            | Genes                                                                                  | FDR               |
| UP_KEYWORDS                                                       | Threonine protease                                 | 5     | 0.559910414333707 | 0.005497897342676 | P70195, Q9Z2U1, Q9QUM9, Q9R1P4, O09061                                                 | 0.023852416163608 |
| GOTERM_CC_DIRECT                                                  | GO:0005839~proteasome core complex                 | 5     | 0.559910414333707 | 0.005761400535585 | P70195, Q9Z2U1, Q9QUM9, Q9R1P4, O09061                                                 | 0.049644067948293 |
| <b>Annotation Cluster 47</b> Enrichment Score: 1.6459982135692277 |                                                    |       |                   |                   |                                                                                        |                   |
| Category                                                          | Term                                               | Count | %                 | PValue            | Genes                                                                                  | FDR               |
| KEGG_PATHWAY                                                      | mmu00480:Glutathione metabolism                    | 9     | 1.00783874580067  | 0.009793831553797 | P97494, O70325, O88844, Q9DCD0, O09172, P51855, O09131, Q64674, P07742                 | 0.082870882378281 |
| UP_KEYWORDS                                                       | Glutathione biosynthesis                           | 3     | 0.335946248600224 | 0.020742051400234 | P97494, O09172, P51855                                                                 | 0.073542218741895 |
| <b>Annotation Cluster 48</b> Enrichment Score: 1.638906603236534  |                                                    |       |                   |                   |                                                                                        |                   |
| Category                                                          | Term                                               | Count | %                 | PValue            | Genes                                                                                  | FDR               |
| GOTERM_CC_DIRECT                                                  | GO:0097255~R2TP complex                            | 4     | 0.447928331466965 | 0.001613827983022 | P60122, Q9CQJ2, Q9WTM5, Q9D706                                                         | 0.016359785631815 |
| <b>Annotation Cluster 49</b> Enrichment Score: 1.5982722223370445 |                                                    |       |                   |                   |                                                                                        |                   |
| Category                                                          | Term                                               | Count | %                 | PValue            | Genes                                                                                  | FDR               |
| UP_KEYWORDS                                                       | Amino-acid biosynthesis                            | 6     | 0.671892497200448 | 0.001224119349834 | Q99K85, Q91YI0, Q8VCN5, P05201, Q9WVQ5, Q922D8                                         | 0.006768659934379 |
| <b>Annotation Cluster 50</b> Enrichment Score: 1.4517064727056772 |                                                    |       |                   |                   |                                                                                        |                   |
| Category                                                          | Term                                               | Count | %                 | PValue            | Genes                                                                                  | FDR               |

|                                                                   |                               |       |                   |                      |                                                                                                                                                                                                                                                                                                                                                                                                                                                                                                                                                                                                                                                                                                                 |                   |
|-------------------------------------------------------------------|-------------------------------|-------|-------------------|----------------------|-----------------------------------------------------------------------------------------------------------------------------------------------------------------------------------------------------------------------------------------------------------------------------------------------------------------------------------------------------------------------------------------------------------------------------------------------------------------------------------------------------------------------------------------------------------------------------------------------------------------------------------------------------------------------------------------------------------------|-------------------|
| UP_KEYWORDS                                                       | Redox-active center           | 9     | 1.00783874580067  | 0.000143373794576    | P20108, Q9JLT4, O08807, Q9CQM5, P99029, Q80Y14, Q9JMH6, Q8R2E9, Q8R180                                                                                                                                                                                                                                                                                                                                                                                                                                                                                                                                                                                                                                          | 0.001010785251761 |
| <b>Annotation Cluster 51</b> Enrichment Score: 1.3858343533266806 |                               |       |                   |                      |                                                                                                                                                                                                                                                                                                                                                                                                                                                                                                                                                                                                                                                                                                                 |                   |
| Category                                                          | Term                          | Count | %                 | PValue               | Genes                                                                                                                                                                                                                                                                                                                                                                                                                                                                                                                                                                                                                                                                                                           | FDR               |
| UP_KEYWORDS                                                       | Transferase                   | 86    | 9.63045912653975  | 3.99522763552965E-05 | Q91YR5, Q9CWQ0, Q61510, Q8K1R7, B2RQC6, P19096, Q8CGY8, Q9WTP7, Q8K1J6, Q9DBL7, Q9CS42, P11440, P68181, Q61036, Q8CAY6, P12382, Q9JLV6, P63085, Q8BY71, Q3THS6, Q9Z120, Q6P9R2, Q1HFEZ0, Q9JKX6, P49138, P05132, Q3TX08, Q9WV85, Q9DBC7, Q3TRM8, Q6PGB6, P13439, Q91YQ5, Q9JLI6, P22907, Q64674, Q9DBG6, P18654, Q09200, Q68FH4, Q9D270, Q8VHI3, Q8K183, O09131, Q91WU5, Q99K85, Q9Z255, O70551, Q2NL51, Q80X41, P11103, Q9R0N0, Q80WS3, Q99KQ4, Q3TW96, P31750, Q93092, Q9CQ65, Q9CWJ9, Q80TE0, Q8CIG8, Q91V92, Q8JZK9, Q03963, Q04899, P61087, O54988, P04184, P47856, Q8CFI2, Q8VE10, Q9ESL4, Q8BH61, Q64737, P97930, Q61183, O35654, P47809, Q64261, Q04447, P08030, Q9D1G2, Q8BH69, Q9WUA3, Q8CIN4, P05201 | 0.000321901198063 |
| GOTERM_MF_DIRECT:GO:0016740-transferase activity                  |                               | 86    | 9.63045912653975  | 0.000640360699586    | Q91YR5, Q9CWQ0, Q61510, Q8K1R7, B2RQC6, P19096, Q8CGY8, Q9WTP7, Q8K1J6, Q9DBL7, Q9CS42, P11440, P68181, Q61036, Q8CAY6, P12382, Q9JLV6, P63085, Q8BY71, Q3THS6, Q9Z120, Q6P9R2, Q1HFEZ0, Q9JKX6, P49138, P05132, Q3TX08, Q9WV85, Q3TRM8, Q6PGB6, P13439, Q91YQ5, Q9JLI6, P22907, Q64674, Q9DBG6, P18654, Q09200, Q68FH4, Q9D270, Q8VHI3, Q8K183, O09131, Q91WU5, Q99K85, Q9Z255, O70551, Q2NL51, Q80X41, P11103, Q9R0N0, Q80WS3, Q99KQ4, Q3TW96, P31750, Q93092, Q9CQ65, Q9CWJ9, Q80TE0, Q8CIG8, Q91V92, Q8JZK9, Q03963, Q04899, P61087, O54988, P04184, P47856, Q8CFI2, Q8VE10, Q9ESL4, Q8BH61, Q64737, P97930, Q61183, O35654, P47809, Q64261, Q04447, P08030, Q9D1G2, Q8BH69, Q9WUA3, Q8CIN4, P05201         | 0.017755455761237 |
| <b>Annotation Cluster 52</b> Enrichment Score: 1.3829206920248907 |                               |       |                   |                      |                                                                                                                                                                                                                                                                                                                                                                                                                                                                                                                                                                                                                                                                                                                 |                   |
| Category                                                          | Term                          | Count | %                 | PValue               | Genes                                                                                                                                                                                                                                                                                                                                                                                                                                                                                                                                                                                                                                                                                                           | FDR               |
| UP_KEYWORDS                                                       | mRNA transport                | 9     | 1.00783874580067  | 0.007811048090155    | Q61655, O08583, Q9CPN8, Q3U0V1, P63242, P97379, Q6PDM2, Q6P5F9, Q9CWU9                                                                                                                                                                                                                                                                                                                                                                                                                                                                                                                                                                                                                                          | 0.03239287590329  |
| <b>Annotation Cluster 53</b> Enrichment Score: 1.36593875031153   |                               |       |                   |                      |                                                                                                                                                                                                                                                                                                                                                                                                                                                                                                                                                                                                                                                                                                                 |                   |
| Category                                                          | Term                          | Count | %                 | PValue               | Genes                                                                                                                                                                                                                                                                                                                                                                                                                                                                                                                                                                                                                                                                                                           | FDR               |
| UP_KEYWORDS                                                       | Thiol protease                | 13    | 1.45576707726764  | 0.001740594126442    | P10605, Q8R5H1, P29452, B2RRE7, Q9JMA1, P56399, Q9DCH4, Q8K2H2, Q9WUP7, P35123, P70677, Q80U87, Q8R016                                                                                                                                                                                                                                                                                                                                                                                                                                                                                                                                                                                                          | 0.009089769326976 |
| <b>Annotation Cluster 54</b> Enrichment Score: 1.343885102196996  |                               |       |                   |                      |                                                                                                                                                                                                                                                                                                                                                                                                                                                                                                                                                                                                                                                                                                                 |                   |
| Category                                                          | Term                          | Count | %                 | PValue               | Genes                                                                                                                                                                                                                                                                                                                                                                                                                                                                                                                                                                                                                                                                                                           | FDR               |
| KEGG_PATHWAY                                                      | mmu03410:Base excision repair | 7     | 0.783874580067189 | 0.011133068575857    | O35654, P97386, P28352, P11103, P17918, P37913, P39749                                                                                                                                                                                                                                                                                                                                                                                                                                                                                                                                                                                                                                                          | 0.090713892099577 |
| <b>Annotation Cluster 55</b> Enrichment Score: 1.2096845686327968 |                               |       |                   |                      |                                                                                                                                                                                                                                                                                                                                                                                                                                                                                                                                                                                                                                                                                                                 |                   |
| Category                                                          | Term                          | Count | %                 | PValue               | Genes                                                                                                                                                                                                                                                                                                                                                                                                                                                                                                                                                                                                                                                                                                           | FDR               |



|                                                                   |                                          |       |                   |                   |                                                                                                                                                                                                                                                                                                                                                                                                                                        |                   |
|-------------------------------------------------------------------|------------------------------------------|-------|-------------------|-------------------|----------------------------------------------------------------------------------------------------------------------------------------------------------------------------------------------------------------------------------------------------------------------------------------------------------------------------------------------------------------------------------------------------------------------------------------|-------------------|
| UP_KEYWORDS                                                       | Mitochondrion                            | 53    | 5.93505039193729  | 0.003164710399439 | Q8BFR5, Q9DCB8, Q9WTP7, Q8K1J6, Q9DBL7, Q62167, P11440, P63168, Q80ZK0, Q8BMP6, P61222, Q9CRB9, P62075, Q3TIU4, Q9CQH3, P05132, Q3U5F4, O70325, Q2YDW2, Q9CPV4, Q03265, Q9CQX2, Q02053, Q9CQ75, Q07813, Q9CYG7, Q8BP40, Q8BKZ9, P97287, P99029, Q62465, Q9JLT4, Q9CZD3, Q9QUJ7, Q9EPB4, P56383, Q924T2, Q9QYB1, Q91YT0, P62908, Q9CQN1, Q9CQR4, P28352, Q9D338, Q8WTY4, Q9D172, P39749, Q9CQV5, P20108, Q91VD9, Q9Z0X1, Q80Y14, Q9JK81 | 0.014630300535111 |
| <b>Annotation Cluster 56</b> Enrichment Score: 1.1967759216316445 |                                          |       |                   |                   |                                                                                                                                                                                                                                                                                                                                                                                                                                        |                   |
| Category                                                          | Term                                     | Count | %                 | PValue            | Genes                                                                                                                                                                                                                                                                                                                                                                                                                                  | FDR               |
| UP_KEYWORDS                                                       | Signal recognition particle              | 3     | 0.335946248600224 | 0.020742051400234 | Q9D7A6, P49962, Q8BMA6                                                                                                                                                                                                                                                                                                                                                                                                                 | 0.073542218741895 |
| <b>Annotation Cluster 57</b> Enrichment Score: 1.1466822540494708 |                                          |       |                   |                   |                                                                                                                                                                                                                                                                                                                                                                                                                                        |                   |
| Category                                                          | Term                                     | Count | %                 | PValue            | Genes                                                                                                                                                                                                                                                                                                                                                                                                                                  | FDR               |
| UP_KEYWORDS                                                       | Iron-sulfur                              | 7     | 0.783874580067189 | 0.015602084078854 | Q91VD9, Q9DCB8, Q80Y14, Q9CQM9, Q8WTY4, Q00519, Q91YT0                                                                                                                                                                                                                                                                                                                                                                                 | 0.060271064523791 |
| UP_KEYWORDS                                                       | 2Fe-2S                                   | 4     | 0.447928331466965 | 0.031163664750255 | Q91VD9, Q80Y14, Q8WTY4, Q00519                                                                                                                                                                                                                                                                                                                                                                                                         | 0.104620874518714 |
| <b>Annotation Cluster 58</b> Enrichment Score: 1.1200593042378628 |                                          |       |                   |                   |                                                                                                                                                                                                                                                                                                                                                                                                                                        |                   |
| Category                                                          | Term                                     | Count | %                 | PValue            | Genes                                                                                                                                                                                                                                                                                                                                                                                                                                  | FDR               |
| UP_KEYWORDS                                                       | Helicase                                 | 12    | 1.3437849944009   | 0.004126336626741 | Q61655, P49718, Q9EPU0, Q91VR5, Q61656, P60122, P97311, Q62095, Q9WTM5, P97855, Q62167, P54823                                                                                                                                                                                                                                                                                                                                         | 0.018181670761577 |
| <b>Annotation Cluster 59</b> Enrichment Score: 1.0877418023605847 |                                          |       |                   |                   |                                                                                                                                                                                                                                                                                                                                                                                                                                        |                   |
| Category                                                          | Term                                     | Count | %                 | PValue            | Genes                                                                                                                                                                                                                                                                                                                                                                                                                                  | FDR               |
| KEGG_PATHWAY                                                      | mmu00052:Galactose metabolism            | 7     | 0.783874580067189 | 0.007140747601959 | P12382, Q3TRM8, Q9R0N0, P45377, Q9WUA3, Q9D0F9, P21300                                                                                                                                                                                                                                                                                                                                                                                 | 0.068302803149174 |
| KEGG_PATHWAY                                                      | mmu00051:Fructose and mannose metabolism | 7     | 0.783874580067189 | 0.009660722173136 | P23591, P12382, Q8K0C9, Q3TRM8, P45377, Q9WUA3, P21300                                                                                                                                                                                                                                                                                                                                                                                 | 0.082870882378281 |
| <b>Annotation Cluster 60</b> Enrichment Score: 1.037098471235627  |                                          |       |                   |                   |                                                                                                                                                                                                                                                                                                                                                                                                                                        |                   |
| Category                                                          | Term                                     | Count | %                 | PValue            | Genes                                                                                                                                                                                                                                                                                                                                                                                                                                  | FDR               |
| UP_KEYWORDS                                                       | Porphyrin biosynthesis                   | 3     | 0.335946248600224 | 0.027053303235536 | P10518, P70697, P22907                                                                                                                                                                                                                                                                                                                                                                                                                 | 0.092996936179125 |
| <b>Annotation Cluster 61</b> Enrichment Score: 0.9624449823963407 |                                          |       |                   |                   |                                                                                                                                                                                                                                                                                                                                                                                                                                        |                   |
| Category                                                          | Term                                     | Count | %                 | PValue            | Genes                                                                                                                                                                                                                                                                                                                                                                                                                                  | FDR               |
| UP_KEYWORDS                                                       | Cholesterol biosynthesis                 | 4     | 0.447928331466965 | 0.02737143866265  | P58044, Q8JZK9, Q9D1G2, Q9R1J0                                                                                                                                                                                                                                                                                                                                                                                                         | 0.092996936179125 |
| <b>Annotation Cluster 62</b> Enrichment Score: 0.8929607605814427 |                                          |       |                   |                   |                                                                                                                                                                                                                                                                                                                                                                                                                                        |                   |
| Category                                                          | Term                                     | Count | %                 | PValue            | Genes                                                                                                                                                                                                                                                                                                                                                                                                                                  | FDR               |
| UP_KEYWORDS                                                       | Exonuclease                              | 6     | 0.671892497200448 | 0.021119713236213 | Q91VR5, P28352, Q8CI75, Q3TIU4, P39749, Q9DBR1                                                                                                                                                                                                                                                                                                                                                                                         | 0.073542218741895 |
